# Supplementary material for: The pan-cancer landscape of netrin family reveals potential oncogenic biomarkers
Source: Sci Rep. 2020 Mar 23;10:5224. doi: 10.1038/s41598-020-62117-5 (PMC7090012; doi:10.1038/s41598-020-62117-5)
Supplement: Supplementary file 1 — Dataset 1. [file 41598_2020_62117_MOESM1_ESM.xlsx]

## Sheet: Title Page
The pan-cancer landscape of netrin family reveals potential oncogenic biomarkers
Wenjun Hao1,8, Meng Yu2,8, Jiaxing Lin3, Bitian Liu4, Haotian Xing3, Jieping Yang3, Dan Sun3, Feilong Chen3, Mingzhe Jiang3, Chaozhi Tang3, Xizhe Zhang5,6, Yongkang Zhao6,7 and Yuyan Zhu3,7*
1.Department of Urology, The First Affiliated Hospital of Dalian Medical University, Dalian 116011, China
2.Department of Reproductive Biology and Transgenic Animal, China Medical University, Shenyang 110001, China
3.Department of Urology, The First Affiliated Hospital of China Medical University, Shenyang 110001, China
4.Department of Urology, The Second Affiliated Hospital of China Medical University, Shenyang 110001, China
5.School of Computer Science and Engineering, Northeastern University, Shenyang, Liaoning, China
6.National Institute of Health and Medical Big Data, China Medical University, Shenyang, Liaoning, China
7.Joint Laboratory of Artificial Intelligence and Precision Medicine of China Medical University and Northeastern University, Northeastern University, Shenyang, Liaoning, China
8.These authors contributed equally
* Corresponding author: Yuyan Zhu, e-mail: yyzhu@cmu.edu.cn

## Sheet: NTN1（64）
Genetic Ancestry Groups	Case ID	Project	Primary Site	Gender	# Mutations	Percentage of mutation	DNA Change	Type	Consequences	damaging score	VEST3	Prediction(VEST3)	REVEL	Prediction(REVEL)	Impact
EA	TCGA-K4-A3WU	TCGA-BLCA	Bladder	Male	1	21（32.8%） VI domain（51-283）	chr17:g.9022594C>T	Missense	P74L	0.74	0.401	Tolerable	0.578	Damaging	MODHPOVEP: MODERATE, SIFT: deleterious - score 0.03, PolyPhen: possibly_damaging - score 0.542
AA	TCGA-AX-A2HC	TCGA-UCEC	Corpus uteri	Female	2		chr17:g.9022673G>T	Missense	K100N	0.48	0.205	Tolerable	0.422	Damaging	MOTOPOVEP: MODERATE, SIFT: tolerated - score 0.06, PolyPhen: possibly_damaging - score 0.816
EA	TCGA-BR-4184	TCGA-STAD	Stomach	Male	1		chr17:g.9022701G>A	Missense	D110N	0.91	0.277	Tolerable	0.885	Damaging	MODHPRVEP: MODERATE, SIFT: deleterious - score 0, PolyPhen: probably_damaging - score 1
EAA	TCGA-DD-AACI	TCGA-LIHC	Liver and intrahepatic bile ducts	Male	1		chr17:g.9022714C>T	Missense	P114L	0.7	0.786	Damaging	0.569	Damaging	MODHPOVEP: MODERATE, SIFT: deleterious - score 0.04, PolyPhen: possibly_damaging - score 0.636
EA	TCGA-AA-3697	TCGA-COAD	Colon	Male	1		chr17:g.9022738delCCGAGAAC…	Frameshift	E123Cfs*19						HI----VEP: HIGH
EA	TCGA-DF-A2KU	TCGA-UCEC	Corpus uteri	Female	2		chr17:g.9022795A>C	Missense	K141T	0.74	0.87	Damaging	0.704	Damaging	MODHPRVEP: MODERATE, SIFT: deleterious - score 0.01, PolyPhen: probably_damaging - score 1
EA	TCGA-BR-8589	TCGA-STAD	Stomach	Male	1		chr17:g.9022795A>C	Missense	K141T	0.74	0.87	Damaging	0.704	Damaging	MODHPRVEP: MODERATE, SIFT: deleterious - score 0.01, PolyPhen: probably_damaging - score 1
EA	TCGA-DK-A3WW	TCGA-BLCA	Bladder	Male	1		chr17:g.9022800G>A	Missense	E143K	0.87	0.949	Damaging	0.814	Damaging	MODHPRVEP: MODERATE, SIFT: deleterious - score 0, PolyPhen: probably_damaging - score 0.999
EA	TCGA-D5-6530	TCGA-COAD	Colon	Male	1		chr17:g.9022803G>C	Missense	V144L	0.43	0.563	Damaging	0.358	Tolerable	MOTOPOVEP: MODERATE, SIFT: tolerated - score 1, PolyPhen: possibly_damaging - score 0.544
EA	TCGA-XF-A9SV	TCGA-BLCA	Bladder	Male	1		chr17:g.9022837G>A	Missense	R155Q	0.83	0.852	Damaging	0.74	Damaging	MOTOPRVEP: MODERATE, SIFT: tolerated - score 0.05, PolyPhen: probably_damaging - score 0.999
EA	TCGA-60-2724	TCGA-LUSC	Bronchus and lung	Male	1		chr17:g.9022869G>T	Missense	D166Y	0.96	0.914	Damaging	0.873	Damaging	MODHPRVEP: MODERATE, SIFT: deleterious - score 0, PolyPhen: probably_damaging - score 0.995
EA	TCGA-BR-8360	TCGA-STAD	Stomach	Male	1		chr17:g.9022879G>A	Missense	R169H	0.61	0.331	Tolerable	0.432	Damaging	MOTOPOVEP: MODERATE, SIFT: tolerated - score 0.12, PolyPhen: possibly_damaging - score 0.76
EA	TCGA-BR-4361	TCGA-STAD	Stomach	Female	1		chr17:g.9022899T>C	Missense	F176L	0.74	0.356	Tolerable	0.708	Damaging	MODHBEVEP: MODERATE, SIFT: deleterious - score 0.02, PolyPhen: benign - score 0.02
EA	TCGA-66-2794	TCGA-LUSC	Bronchus and lung	Male	1		chr17:g.9023007C>T	Missense	P212S	0.87	0.586	Damaging	0.805	Damaging	MOTOPRVEP: MODERATE, SIFT: tolerated - score 0.05, PolyPhen: probably_damaging - score 0.967
EA	TCGA-G2-A2EF	TCGA-BLCA	Bladder	Male	1		chr17:g.9023028G>A	Missense	A219T	0.87	0.701	Damaging	0.713	Damaging	MODHPRVEP: MODERATE, SIFT: deleterious - score 0.02, PolyPhen: probably_damaging - score 1
NA	TCGA-VQ-A8PP	TCGA-STAD	Stomach	Male	1		chr17:g.9023038C>T	Missense	T222M	0.83	0.786	Damaging	0.706	Damaging	MODHPRVEP: MODERATE, SIFT: deleterious - score 0.03, PolyPhen: probably_damaging - score 1
EA	TCGA-FU-A23L	TCGA-CESC	Cervix uteri	Female	1		chr17:g.9023056C>T	Missense	S228L	0.91	0.585	Damaging	0.677	Damaging	MODHPOVEP: MODERATE, SIFT: deleterious - score 0.01, PolyPhen: possibly_damaging - score 0.869
EA	TCGA-DB-A4X9	TCGA-LGG	Brain	Female	1		chr17:g.9023061C>A	Missense	H230N	0.52	0.559	Damaging	0.313	Tolerable	MOTOPOVEP: MODERATE, SIFT: tolerated - score 0.3, PolyPhen: possibly_damaging - score 0.566
EA	TCGA-EY-A215	TCGA-UCEC	Corpus uteri	Female	1		chr17:g.9023088C>T	Stop Gained	Q239*						HI----VEP: HIGH
EAA	TCGA-ED-A8O6	TCGA-LIHC	Liver and intrahepatic bile ducts	Female	1		chr17:g.9023115C>T	Missense	R248C	0.87	0.617	Damaging	0.771	Damaging	MODHPRVEP: MODERATE, SIFT: deleterious - score 0, PolyPhen: probably_damaging - score 0.946
NA	TCGA-A5-A1OF	TCGA-UCEC	Corpus uteri	Female	2		chr17:g.9023121G>A	Missense	A250T	0.22	0.041	Tolerable	0.141	Tolerable	MOTOBEVEP: MODERATE, SIFT: tolerated - score 0.21, PolyPhen: benign - score 0.008
EA	TCGA-IQ-A61H	TCGA-HNSC	Other and unspecified parts of tongue	Male	1	4（6.25%） V-1 domain（285-333）	chr17:g.9023233delGCAACGGC…	Frameshift	C287Sfs*136						HI----VEP: HIGH
AA	TCGA-WS-AB45	TCGA-COAD	Colon	Female	1		chr17:g.9023256G>A	Missense	V295M	0.43	0.276	Tolerable	0.149	Tolerable	MOTOPOVEP: MODERATE, SIFT: tolerated - score 0.13, PolyPhen: possibly_damaging - score 0.61
EAA	TCGA-AJ-A3EL	TCGA-UCEC	Corpus uteri	Female	1		chr17:g.9023268G>A	Missense	D299N	0.52	0.103	Tolerable	0.079	Tolerable	MOTOPOVEP: MODERATE, SIFT: tolerated - score 0.21, PolyPhen: possibly_damaging - score 0.512
EA	TCGA-VQ-A91K	TCGA-STAD	Stomach	Male	1		chr17:g.9023302C>T	Missense	T310M	0.91	0.953	Damaging	0.666	Damaging	MODHPRVEP: MODERATE, SIFT: deleterious - score 0, PolyPhen: probably_damaging - score 0.999
EA	TCGA-33-6737	TCGA-LUSC	Bronchus and lung	Male	1	15(23.4%) V-2 domain（341-392）	chr17:g.9162836C>T	Missense	R348W	0.7	0.796	Damaging	0.55	Damaging	MODHPRVEP: MODERATE, SIFT: deleterious - score 0, PolyPhen: probably_damaging - score 0.971
EA	TCGA-VQ-A8P2	TCGA-STAD	Stomach	Male	1		chr17:g.9162846G>A	Missense	R351H	0.78	0.676	Damaging	0.403	Damaging	MODHPOVEP: MODERATE, SIFT: deleterious - score 0, PolyPhen: possibly_damaging - score 0.885
EAA	TCGA-BR-8680	TCGA-STAD	Stomach	Male	1		chr17:g.9162846G>A	Missense	R351H	0.78	0.676	Damaging	0.403	Damaging	MODHPOVEP: MODERATE, SIFT: deleterious - score 0, PolyPhen: possibly_damaging - score 0.885
EA	TCGA-AA-A00N	TCGA-COAD	Colon	Male	1		chr17:g.9162873C>T	Missense	S360L	0.87	0.89	Damaging	0.542	Damaging	MODHPOVEP: MODERATE, SIFT: deleterious - score 0.03, PolyPhen: possibly_damaging - score 0.593
AA	TCGA-AX-A2HC	TCGA-UCEC	Corpus uteri	Female	2		chr17:g.9162879G>A	Missense	R362H	0.78	0.74	Damaging	0.42	Damaging	MODHPRVEP: MODERATE, SIFT: deleterious - score 0.02, PolyPhen: probably_damaging - score 0.931
EA	TCGA-28-5213	TCGA-GBM	Brain	Male	1		chr17:g.9162887G>A	Missense	G365R	0.87	0.992	Damaging	0.745	Damaging	MODHPRVEP: MODERATE, SIFT: deleterious - score 0, PolyPhen: probably_damaging - score 0.982
EA	TCGA-CN-A497	TCGA-HNSC	Larynx	Male	1		chr17:g.9162888G>T	Missense	G365V	0.91	0.907	Damaging	0.685	Damaging	MODHPRVEP: MODERATE, SIFT: deleterious - score 0, PolyPhen: probably_damaging - score 0.926
EA	TCGA-AA-3845	TCGA-COAD	Colon	Female	1		chr17:g.9162893G>A	Missense	V367I	0.52	0.37	Tolerable	0.285	Tolerable	MOTOPOVEP: MODERATE, SIFT: tolerated - score 0.1, PolyPhen: possibly_damaging - score 0.669
EA	TCGA-D1-A1NZ	TCGA-UCEC	Corpus uteri	Female	1		chr17:g.9162897G>A	Missense	C368Y	0.96	0.997	Damaging	0.948	Damaging	MODHPRVEP: MODERATE, SIFT: deleterious - score 0, PolyPhen: probably_damaging - score 0.958
AA	TCGA-C5-A7UI	TCGA-CESC	Cervix uteri	Female	1		chr17:g.9162903A>G	Missense	N370S	0.57	0.162	Tolerable	0.292	Tolerable	MOTOBEVEP: MODERATE, SIFT: tolerated - score 0.08, PolyPhen: benign - score 0.101
EAA	TCGA-CD-A4MI	TCGA-STAD	Stomach	Male	1		chr17:g.9162909G>A	Missense	R372H	0.87	0.793	Damaging	0.645	Damaging	MODHPRVEP: MODERATE, SIFT: deleterious - score 0, PolyPhen: probably_damaging - score 0.97
EA	TCGA-KK-A59V	TCGA-PRAD	Prostate gland	Male	1		chr17:g.9162923G>A	Missense	G377S	0.96	0.969	Damaging	0.902	Damaging	MODHPRVEP: MODERATE, SIFT: deleterious - score 0, PolyPhen: probably_damaging - score 0.989
EA	TCGA-F7-A624	TCGA-HNSC	Other and unspecified parts of mouth	Male	1		chr17:g.9162960G>A	Missense	R389H	0.91	0.869	Damaging	0.528	Damaging	MODHPRVEP: MODERATE, SIFT: deleterious - score 0, PolyPhen: probably_damaging - score 0.995
EA	TCGA-UZ-A9Q0	TCGA-KIRP	Kidney	Male	1		chr17:g.9162960G>T	Missense	R389L	0.91	0.969	Damaging	0.707	Damaging	MODHPRVEP: MODERATE, SIFT: deleterious - score 0, PolyPhen: probably_damaging - score 0.949
EA	TCGA-QK-A64Z	TCGA-HNSC	Palate	Female	1		chr17:g.9162987G>T	Missense	R398L	0.78	0.896	Damaging	0.491	Damaging	MODHPRVEP: MODERATE, SIFT: deleterious - score 0, PolyPhen: probably_damaging - score 0.984
EA	TCGA-14-0862	TCGA-GBM	Brain	Male	1	2(3.13%) linker（393-403）	chr17:g.9162989A>T	Stop Gained	K399*						HI----VEP: HIGH
EA	TCGA-AX-A3FS	TCGA-UCEC	Corpus uteri	Female	1		chr17:g.9162992G>A	Missense	A400T	0.61	0.709	Damaging	0.197	Tolerable	MODHPRVEP: MODERATE, SIFT: deleterious - score 0.02, PolyPhen: probably_damaging - score 0.981
EA	TCGA-VS-A9UZ	TCGA-CESC	Cervix uteri	Female	1	4（6.25%） V-3 domain（404-445）	chr17:g.9179884delGTGACG	Inframe Deletion	V429_T430del						MO----VEP: MODERATE
EA	TCGA-DF-A2KN	TCGA-UCEC	Corpus uteri	Female	1		chr17:g.9179884G>A	Missense	V429M	0.91	0.857	Damaging	0.636	Damaging	MODHPRVEP: MODERATE, SIFT: deleterious - score 0, PolyPhen: probably_damaging - score 0.997
AA	TCGA-N1-A6IA	TCGA-SARC	Uterus, NOS	Female	1		chr17:g.9179890G>C	Missense	G431R	0.96	0.917	Damaging	0.865	Damaging	MODHPRVEP: MODERATE, SIFT: deleterious - score 0, PolyPhen: probably_damaging - score 1
AA	TCGA-12-0775	TCGA-GBM	Brain	Female	1		chr17:g.9179933delG	Frameshift	R445Pfs*8						HI----VEP: HIGH
EA	TCGA-S9-A7J3	TCGA-LGG	Brain	Female	1	10(15.6%) linker(446-487)	chr17:g.9179936C>T	Missense	S446F	0.87	0.826	Damaging	0.547	Damaging	MODHPRVEP: MODERATE, SIFT: deleterious - score 0, PolyPhen: probably_damaging - score 1
EA	TCGA-D5-6540	TCGA-COAD	Colon	Male	1		chr17:g.9182928C>T	Missense	A457V	0.22	0.196	Tolerable	0.05	Tolerable	MOTOBEVEP: MODERATE, SIFT: tolerated - score 0.48, PolyPhen: benign - score 0
NA	TCGA-VQ-A8PO	TCGA-STAD	Stomach	Male	1		chr17:g.9182933C>A	Missense	P459T	0.48	0.824	Damaging	0.193	Tolerable	MOTOPOVEP: MODERATE, SIFT: tolerated - score 0.24, PolyPhen: possibly_damaging - score 0.908
EA	TCGA-EI-6883	TCGA-READ	Rectum	Male	1		chr17:g.9182933C>A	Missense	P459T	0.48	0.824	Damaging	0.193	Tolerable	MOTOPOVEP: MODERATE, SIFT: tolerated - score 0.24, PolyPhen: possibly_damaging - score 0.908
EA	TCGA-AG-3883	TCGA-READ	Rectum	Male	1		chr17:g.9182933C>A	Missense	P459T	0.48	0.824	Damaging	0.193	Tolerable	MOTOPOVEP: MODERATE, SIFT: tolerated - score 0.24, PolyPhen: possibly_damaging - score 0.908
EA	TCGA-AJ-A3BG	TCGA-UCEC	Corpus uteri	Female	2		chr17:g.9182949G>A	Missense	S464N	0.43	0.271	Tolerable	0.071	Tolerable	MOTOBEVEP: MODERATE, SIFT: tolerated - score 0.23, PolyPhen: benign - score 0.159
EA	TCGA-44-6144	TCGA-LUAD	Bronchus and lung	Male	1		chr17:g.9182954G>T	Missense	V466L	0.09	0.133	Tolerable	0.041	Tolerable	MOTOBEVEP: MODERATE, SIFT: tolerated - score 0.4, PolyPhen: benign - score 0.003
EA	TCGA-AX-A2HD	TCGA-UCEC	Corpus uteri	Female	3		chr17:g.9182959G>T	Missense	E467D	0.3	0.635	Damaging	0.214	Tolerable	MOTOBEVEP: MODERATE, SIFT: tolerated - score 0.26, PolyPhen: benign - score 0.004
EA	TCGA-AX-A1CE	TCGA-UCEC	Corpus uteri	Female	1		chr17:g.9182960G>T	Stop Gained	E468*						HI----VEP: HIGH
EA	TCGA-06-5416	TCGA-GBM	Brain	Female	1		chr17:g.9221168A>G	Missense	D471G	0.57	0.809	Damaging	0.251	Tolerable	MOTOBEVEP: MODERATE, SIFT: tolerated - score 0.09, PolyPhen: benign - score 0.008
EA	TCGA-AA-A010	TCGA-COAD	Colon	Female	1	7（10.9%） NTR domain（488-594）	chr17:g.9221232G>T	Missense	K492N	0.7	0.125	Tolerable	0.318	Tolerable	MODHPRVEP: MODERATE, SIFT: deleterious - score 0, PolyPhen: probably_damaging - score 0.975
EA	TCGA-B5-A0JY	TCGA-UCEC	Corpus uteri	Female	1		chr17:g.9239678G>T	Missense	D509Y	0.65	0.611	Damaging	0.325	Tolerable	MODHPOVEP: MODERATE, SIFT: deleterious - score 0.01, PolyPhen: possibly_damaging - score 0.815
EA	TCGA-A5-A0G1	TCGA-UCEC	Corpus uteri	Female	1		chr17:g.9239724G>A	Missense	G524D	0.57	0.901	Damaging	0.346	Tolerable	MOTOPRVEP: MODERATE, SIFT: tolerated - score 0.14, PolyPhen: probably_damaging - score 0.95
NA	TCGA-A5-A1OF	TCGA-UCEC	Corpus uteri	Female	2		chr17:g.9239742G>A	Missense	R530H	0.7	0.51	Damaging	0.347	Tolerable	MODHPRVEP: MODERATE, SIFT: deleterious - score 0.01, PolyPhen: probably_damaging - score 1
EA	TCGA-VS-A9V3	TCGA-CESC	Cervix uteri	Female	1		chr17:g.9239844C>T	Missense	S564F	0.7	0.733	Damaging	0.233	Tolerable	MODHPRVEP: MODERATE, SIFT: deleterious - score 0.01, PolyPhen: probably_damaging - score 0.914
EA	TCGA-DK-A1AC	TCGA-BLCA	Bladder	Male	1		chr17:g.9239844C>T	Missense	S564F	0.7	0.733	Damaging	0.233	Tolerable	MODHPRVEP: MODERATE, SIFT: deleterious - score 0.01, PolyPhen: probably_damaging - score 0.914
EA	TCGA-CR-7371	TCGA-HNSC	Larynx	Female	1		chr17:g.9239931A>G	Missense	Q593R	0.52	0.451	Tolerable	0.194	Tolerable	MOTOPRVEP: MODERATE, SIFT: tolerated - score 0.08, PolyPhen: probably_damaging - score 0.996
AA	TCGA-NH-A5IV	TCGA-COAD	Colon	Female	2	1（1.56%） linker（595-604）	chr17:g.9239949G>A	Missense	G599D	0.57	0.671	Damaging	0.246	Tolerable	MODHPRVEP: MODERATE, SIFT: deleterious - score 0.05, PolyPhen: probably_damaging - score 1

## Sheet: NTN3（37）
Genetic Ancestry Groups	Case ID	Project	Primary Site	Gender	# Mutations	Percentage of mutation	DNA Change	Type	Consequences	damaging score	VEST3	Prediction(VEST3)	REVEL	Prediction(REVEL)	Impact
EA	TCGA-VQ-A8PT	TCGA-STAD	Stomach	Male	1	21（56.8%） VI domain（40-253）	chr16:g.2471879G>A	Missense	G60R	0.83	0.65	Damaging	0.788	Damaging	MODHPOVEP: MODERATE, SIFT: deleterious - score 0, PolyPhen: possibly_damaging - score 0.888
EAA	TCGA-LN-A4MQ	TCGA-ESCA	Esophagus	Male	1		chr16:g.2471981C>T	Missense	R94C	0.61	0.409	Tolerable	0.603	Damaging	MODHPOVEP: MODERATE, SIFT: deleterious - score 0.01, PolyPhen: possibly_damaging - score 0.904
AA	TCGA-NK-A7XE	TCGA-LUSC	Bronchus and lung	Male	1		chr16:g.2471999C>T	Missense	R100W	0.26	0.187	Tolerable	0.209	Tolerable	MODHPOVEP: MODERATE, SIFT: deleterious - score 0, PolyPhen: possibly_damaging - score 0.817
NA	TCGA-HT-8564	TCGA-LGG	Brain	Male	2		chr16:g.2472003C>T	Missense	A101V	0.09	0.03	Tolerable	0.132	Tolerable	MOTOBEVEP: MODERATE, SIFT: tolerated - score 0.49, PolyPhen: benign - score 0.007
EA	TCGA-AX-A2HD	TCGA-UCEC	Corpus uteri	Female	2		chr16:g.2472069G>A	Missense	R123H	0.39	0.137	Tolerable	0.178	Tolerable	MOTOBEVEP: MODERATE, SIFT: tolerated - score 0.05, PolyPhen: benign - score 0.058
EA	TCGA-CG-5721	TCGA-STAD	Stomach	Male	1		chr16:g.2472123G>A	Missense	G141D	0.87	0.899	Damaging	0.807	Damaging	MODHPRVEP: MODERATE, SIFT: deleterious - score 0, PolyPhen: probably_damaging - score 1
EA	TCGA-BR-8059	TCGA-STAD	Stomach	Male	1		chr16:g.2472135C>T	Missense	A145V	0.13	0.042	Tolerable	0.041	Tolerable	MOTOBEVEP: MODERATE, SIFT: tolerated - score 1, PolyPhen: benign - score 0.013
NA	TCGA-HT-8564	TCGA-LGG	Brain	Male	2		chr16:g.2472179C>T	Missense	R160C	0.65	0.741	Damaging	0.58	Damaging	MODHPRVEP: MODERATE, SIFT: deleterious - score 0, PolyPhen: probably_damaging - score 0.999
EA	TCGA-EY-A215	TCGA-UCEC	Corpus uteri	Female	2		chr16:g.2472223G>T	Missense	E174D	0.52	0.412	Tolerable	0.378	Tolerable	MODHPRVEP: MODERATE, SIFT: deleterious - score 0, PolyPhen: probably_damaging - score 0.994
NA	TCGA-DS-A1OC	TCGA-CESC	Cervix uteri	Female	1		chr16:g.2472245_2472246insA	Frameshift	L182Hfs*5						HI----VEP: HIGH
NA	TCGA-A5-A1OF	TCGA-UCEC	Corpus uteri	Female	1		chr16:g.2472255C>A	Missense	P185H	0.35	0.183	Tolerable	0.441	Damaging	MOTOPOVEP: MODERATE, SIFT: tolerated - score 0.06, PolyPhen: possibly_damaging - score 0.798
EA	TCGA-BG-A220	TCGA-UCEC	Corpus uteri	Female	1		chr16:g.2472298delC	Frameshift	P201Qfs*15						HI----VEP: HIGH
EA	TCGA-L5-A4OI	TCGA-ESCA	Esophagus	Male	1		chr16:g.2472298delC	Frameshift	P201Qfs*15						HI----VEP: HIGH
EA	TCGA-VQ-A91K	TCGA-STAD	Stomach	Male	1		chr16:g.2472298delC	Frameshift	P201Qfs*15						HI----VEP: HIGH
EA	TCGA-AA-3510	TCGA-COAD	Colon	Male	1		chr16:g.2472338G>T	Missense	D213Y	0.87	0.882	Damaging	0.861	Damaging	MODHPRVEP: MODERATE, SIFT: deleterious - score 0, PolyPhen: probably_damaging - score 0.992
EA	TCGA-D5-6922	TCGA-COAD	Colon	Male	1		chr16:g.2472348C>T	Missense	T216I	0.87	0.699	Damaging	0.79	Damaging	MODHPRVEP: MODERATE, SIFT: deleterious - score 0, PolyPhen: probably_damaging - score 0.985
EA	TCGA-DF-A2KU	TCGA-UCEC	Corpus uteri	Female	1		chr16:g.2472410G>T	Stop Gained	E237*						HI----VEP: HIGH
EA	TCGA-IB-7651	TCGA-PAAD	Pancreas	Female	3		chr16:g.2472416G>A	Missense	V239I	0.13	0.015	Tolerable	0.138	Tolerable	MOTOBEVEP: MODERATE, SIFT: tolerated - score 0.19, PolyPhen: benign - score 0.001
NA	TCGA-VQ-A924	TCGA-STAD	Stomach	Male	1		chr16:g.2472416G>A	Missense	V239I	0.13	0.015	Tolerable	0.138	Tolerable	MOTOBEVEP: MODERATE, SIFT: tolerated - score 0.19, PolyPhen: benign - score 0.001
EA	TCGA-CV-7254	TCGA-HNSC	Other and ill-defined sites in lip, oral cavity and pharynx	Male	1		chr16:g.2472434G>C	Missense	A245P	0.52	0.718	Damaging	0.576	Damaging	MODHPOVEP: MODERATE, SIFT: deleterious - score 0, PolyPhen: possibly_damaging - score 0.533
EA	TCGA-18-3409	TCGA-LUSC	Bronchus and lung	Male	1		chr16:g.2472449C>T	Stop Gained	Q250*						HI----VEP: HIGH
EA	TCGA-EO-A3AU	TCGA-UCEC	Corpus uteri	Female	1	1（2.7%） linker（254）	chr16:g.2472462G>A	Missense	R254H	0.78	0.637	Damaging	0.515	Damaging	MODHPRVEP: MODERATE, SIFT: deleterious - score 0, PolyPhen: probably_damaging - score 0.994
EA	TCGA-95-7039	TCGA-LUAD	Bronchus and lung	Female	1	3（8.1%） V-1 domain（255-298）	chr16:g.2472509G>T	Missense	G270C	0.7	0.524	Damaging	0.347	Tolerable	MODHPRVEP: MODERATE, SIFT: deleterious - score 0, PolyPhen: probably_damaging - score 0.984
EA	TCGA-AP-A1DV	TCGA-UCEC	Corpus uteri	Female	1		chr16:g.2472530C>T	Missense	R277W	0.48	0.297	Tolerable	0.246	Tolerable	MODHPOVEP: MODERATE, SIFT: deleterious - score 0, PolyPhen: possibly_damaging - score 0.904
EA	TCGA-EI-7002	TCGA-READ	Rectum	Male	1		chr16:g.2472560C>T	Missense	R287C	0.83	0.756	Damaging	0.623	Damaging	MODHPRVEP: MODERATE, SIFT: deleterious - score 0, PolyPhen: probably_damaging - score 0.999
EA	TCGA-A6-2677	TCGA-COAD	Colon	Female	1	1（2.7%） linker（299-310）	chr16:g.2472608C>T	Missense	R303W	0.48	0.378	Tolerable	0.202	Tolerable	MODHBEVEP: MODERATE, SIFT: deleterious - score 0.01, PolyPhen: benign - score 0.02
EA	TCGA-N7-A4Y0	TCGA-UCS	Uterus, NOS	Female	1	5(13.5%) V-2 domain（311-366）	chr16:g.2472734G>A	Missense	R321H	0.83	0.526	Damaging	0.455	Damaging	MODHPRVEP: MODERATE, SIFT: deleterious - score 0, PolyPhen: probably_damaging - score 0.999
EA	TCGA-IB-7651	TCGA-PAAD	Pancreas	Female	3		chr16:g.2472740A>C	Missense	N323T	0.7	0.408	Tolerable	0.55	Damaging	MODHPRVEP: MODERATE, SIFT: deleterious - score 0, PolyPhen: probably_damaging - score 0.997
EA	TCGA-BH-A18G	TCGA-BRCA	Breast	Female	1		chr16:g.2472740A>T	Missense	N323I	0.74	0.728	Damaging	0.629	Damaging	MODHPRVEP: MODERATE, SIFT: deleterious - score 0, PolyPhen: probably_damaging - score 0.999
EA	TCGA-G4-6320	TCGA-COAD	Colon	Male	1		chr16:g.2472797G>A	Missense	R342Q	0.7	0.54	Damaging	0.321	Tolerable	MODHPRVEP: MODERATE, SIFT: deleterious - score 0.03, PolyPhen: probably_damaging - score 0.996
EA	TCGA-DI-A1BU	TCGA-UCEC	Corpus uteri	Female	1		chr16:g.2472824A>G	Missense	H351R	0.7	0.687	Damaging	0.458	Damaging	MODHPRVEP: MODERATE, SIFT: deleterious - score 0.02, PolyPhen: probably_damaging - score 0.996
EA	TCGA-EE-A29S	TCGA-SKCM	Skin	Male	1	1(2.7%) linker(367-373)	chr16:g.2472889G>A	Missense	A373T	0.64	0.459	Tolerable	0.178	Tolerable	MODHPRVEP: MODERATE, SIFT: deleterious - score 0.02, PolyPhen: probably_damaging - score 0.993
EA	TCGA-D1-A17Q	TCGA-UCEC	Corpus uteri	Female	1	3(8.1%) V-3 domain（374-416）	chr16:g.2472990G>A	Missense	D375N	0.65	0.106	Tolerable	0.324	Tolerable	MOTOPRVEP: MODERATE, SIFT: tolerated - score 0.18, PolyPhen: probably_damaging - score 0.998
AA	TCGA-AP-A0LM	TCGA-UCEC	Corpus uteri	Female	1		chr16:g.2473089G>A	Missense	A408T	0.78	0.677	Damaging	0.45	Damaging	MODHPRVEP: MODERATE, SIFT: deleterious - score 0.01, PolyPhen: probably_damaging - score 0.998
EA	TCGA-OR-A5JM	TCGA-ACC	Adrenal gland	Female	1		chr16:g.2473111G>A	Missense	R415H	0.74	0.646	Damaging	0.432	Damaging	MODHPRVEP: MODERATE, SIFT: deleterious - score 0.01, PolyPhen: probably_damaging - score 0.999
EA	TCGA-IB-7651	TCGA-PAAD	Pancreas	Female	3	2(5.4%) linker(417-456)	chr16:g.2473430C>A	Missense	D440E	0.22	0.202	Tolerable	0.047	Tolerable	MOTOBEVEP: MODERATE, SIFT: tolerated - score 0.38, PolyPhen: benign - score 0.069
EA	TCGA-DU-6392	TCGA-LGG	Brain	Female	1		chr16:g.2473468G>A	Missense	R453H	0.57	0.363	Tolerable	0.167	Tolerable	MOTOPRVEP: MODERATE, SIFT: tolerated - score 0.12, PolyPhen: probably_damaging - score 0.994
						NTR domain（457-570）

## Sheet: NTN4（120）
Genetic Ancestry Groups	Case ID	Project	Primary Site	Gender	# Mutations	Percentage of mutation	DNA Change	Type	Consequences	damaging score	VEST3	Prediction(VEST3)	REVEL	Prediction(REVEL)	Impact
EA	TCGA-EE-A29M	TCGA-SKCM	Skin	Female	1	1（0.83%） linker（1-33）	chr12:g.95787433C>T	Missense	E31K	0.57	0.565	Damaging	0.158	Tolerable	MOTOPOVEP: MODERATE, SIFT: tolerated - score 0.1, PolyPhen: possibly_damaging - score 0.735
EA	TCGA-BR-8591	TCGA-STAD	Stomach	Male	1	42（35%） VI domain（34-260）	chr12:g.95787415G>A	Missense	R37W	0.83	0.499	Tolerable	0.534	Damaging	MODHPOVEP: MODERATE, SIFT: deleterious - score 0.03, PolyPhen: possibly_damaging - score 0.832
AA	TCGA-NH-A8F8	TCGA-COAD	Colon	Male	1		chr12:g.95787415G>A	Missense	R37W	0.83	0.499	Tolerable	0.534	Damaging	MODHPOVEP: MODERATE, SIFT: deleterious - score 0.03, PolyPhen: possibly_damaging - score 0.832
EA	TCGA-D3-A1Q6	TCGA-SKCM	Skin	Male	1		chr12:g.95787410C>T	Missense	M38I	0.52	0.864	Damaging	0.244	Tolerable	MOTOBEVEP: MODERATE, SIFT: tolerated - score 0.34, PolyPhen: benign - score 0.129
EAA	TCGA-A5-A0G2	TCGA-UCEC	Corpus uteri	Female	5		chr12:g.95787390C>T	Missense	R45Q	0.87	0.873	Damaging	0.751	Damaging	MODHPRVEP: MODERATE, SIFT: deleterious - score 0, PolyPhen: probably_damaging - score 1
EA	TCGA-EB-A85J	TCGA-SKCM	Skin	Female	1		chr12:g.95787390C>T	Missense	R45Q	0.87	0.873	Damaging	0.751	Damaging	MODHPRVEP: MODERATE, SIFT: deleterious - score 0, PolyPhen: probably_damaging - score 1
EAA	TCGA-EO-A3AV	TCGA-UCEC	Corpus uteri	Female	1		chr12:g.95787349C>T	Missense	E59K	0.91	0.945	Damaging	0.818	Damaging	MODHPRVEP: MODERATE, SIFT: deleterious - score 0, PolyPhen: probably_damaging - score 0.981
EA	TCGA-AG-A002	TCGA-READ	Rectum	Male	3		chr12:g.95787349C>T	Missense	E59K	0.91	0.945	Damaging	0.818	Damaging	MODHPRVEP: MODERATE, SIFT: deleterious - score 0, PolyPhen: probably_damaging - score 0.981
EA	TCGA-EI-6917	TCGA-READ	Rectum	Male	1		chr12:g.95787349C>T	Missense	E59K	0.91	0.945	Damaging	0.818	Damaging	MODHPRVEP: MODERATE, SIFT: deleterious - score 0, PolyPhen: probably_damaging - score 0.981
EA	TCGA-AA-A010	TCGA-COAD	Colon	Female	1		chr12:g.95787349C>T	Missense	E59K	0.91	0.945	Damaging	0.818	Damaging	MODHPRVEP: MODERATE, SIFT: deleterious - score 0, PolyPhen: probably_damaging - score 0.981
EA	TCGA-HT-8110	TCGA-LGG	Brain	Male	1		chr12:g.95787321G>A	Missense	T68M	0.3	0.238	Tolerable	0.222	Tolerable	MODHBEVEP: MODERATE, SIFT: deleterious - score 0.04, PolyPhen: benign - score 0.425
EA	TCGA-AA-3492	TCGA-COAD	Colon	Female	1		chr12:g.95787286A>G	Missense	C80R	0.91	0.955	Damaging	0.796	Damaging	MODHPRVEP: MODERATE, SIFT: deleterious - score 0, PolyPhen: probably_damaging - score 1
AA	TCGA-AX-A2HC	TCGA-UCEC	Corpus uteri	Female	4		chr12:g.95787268G>T	Missense	H86N	0.22	0.096	Tolerable	0.159	Tolerable	MOTOBEVEP: MODERATE, SIFT: tolerated - score 0.52, PolyPhen: benign - score 0.021
EA	TCGA-AR-A2LE	TCGA-BRCA	Breast	Female	1		chr12:g.95787249G>A	Missense	S92F	0.57	0.356	Tolerable	0.412	Damaging	MODHPOVEP: MODERATE, SIFT: deleterious - score 0.04, PolyPhen: possibly_damaging - score 0.571
EA	TCGA-EE-A2MR	TCGA-SKCM	Skin	Male	2		chr12:g.95787220G>A	Missense	P102S	0.78	0.791	Damaging	0.569	Damaging	MOTOPRVEP: MODERATE, SIFT: tolerated - score 0.07, PolyPhen: probably_damaging - score 1
EA	TCGA-14-0865	TCGA-GBM	Brain	Male	1		chr12:g.95787207C>T	Stop Gained	W106*						HI----VEP: HIGH
EA	TCGA-GU-A767	TCGA-BLCA	Bladder	Male	1		chr12:g.95787201G>A	Missense	S108F	0.91	0.841	Damaging	0.822	Damaging	MODHPRVEP: MODERATE, SIFT: deleterious - score 0, PolyPhen: probably_damaging - score 0.991
EA	TCGA-G4-6302	TCGA-COAD	Colon	Female	1		chr12:g.95787198G>A	Missense	A109V	0.74	0.416	Tolerable	0.494	Damaging	MODHPOVEP: MODERATE, SIFT: deleterious - score 0, PolyPhen: possibly_damaging - score 0.71
EA	TCGA-FW-A3R5	TCGA-SKCM	Skin	Male	4		chr12:g.95787196C>T	Missense	E110K	0.26	0.327	Tolerable	0.229	Tolerable	MOTOBEVEP: MODERATE, SIFT: tolerated - score 0.36, PolyPhen: benign - score 0.155
EA	TCGA-12-0828	TCGA-GBM	Brain	Male	1		chr12:g.95787194C>G	Missense	E110D	0.43	0.141	Tolerable	0.175	Tolerable	MOTOPOVEP: MODERATE, SIFT: tolerated - score 0.24, PolyPhen: possibly_damaging - score 0.491
EA	TCGA-IH-A3EA	TCGA-SKCM	Skin	Male	1		chr12:g.95787160C>T	Missense	E122K	0.87	0.933	Damaging	0.734	Damaging	MODHPRVEP: MODERATE, SIFT: deleterious - score 0, PolyPhen: probably_damaging - score 0.997
EA	TCGA-D1-A17Q	TCGA-UCEC	Corpus uteri	Female	1		chr12:g.95787149G>T	Missense	F125L	0.87	0.895	Damaging	0.789	Damaging	MODHPRVEP: MODERATE, SIFT: deleterious - score 0, PolyPhen: probably_damaging - score 0.986
EA	TCGA-AX-A0J0	TCGA-UCEC	Corpus uteri	Female	1		chr12:g.95787149G>T	Missense	F125L	0.87	0.895	Damaging	0.789	Damaging	MODHPRVEP: MODERATE, SIFT: deleterious - score 0, PolyPhen: probably_damaging - score 0.986
EA	TCGA-AP-A1DV	TCGA-UCEC	Corpus uteri	Female	1		chr12:g.95787149G>T	Missense	F125L	0.87	0.895	Damaging	0.789	Damaging	MODHPRVEP: MODERATE, SIFT: deleterious - score 0, PolyPhen: probably_damaging - score 0.986
EA	TCGA-B5-A3FA	TCGA-UCEC	Corpus uteri	Female	2		chr12:g.95787115G>A	Missense	P137S	0.78	0.835	Damaging	0.633	Damaging	MODHPRVEP: MODERATE, SIFT: deleterious - score 0.02, PolyPhen: probably_damaging - score 0.989
EA	TCGA-FR-A726	TCGA-SKCM	Skin	Male	1		chr12:g.95787097C>T	Missense	V143M	0.7	0.508	Damaging	0.611	Damaging	MODHPRVEP: MODERATE, SIFT: deleterious - score 0.01, PolyPhen: probably_damaging - score 0.972
EA	TCGA-AP-A059	TCGA-UCEC	Corpus uteri	Female	4		chr12:g.95787060T>G	Missense	K155T	0.22	0.453	Tolerable	0.236	Tolerable	MOTOBEVEP: MODERATE, SIFT: tolerated - score 0.14, PolyPhen: benign - score 0.052
EAA	TCGA-LN-A5U6	TCGA-ESCA	Esophagus	Male	2		chr12:g.95787059C>A	Missense	K155N	0.43	0.239	Tolerable	0.312	Tolerable	MODHPOVEP: MODERATE, SIFT: deleterious - score 0.04, PolyPhen: possibly_damaging - score 0.456
EAA	TCGA-LN-A5U6	TCGA-ESCA	Esophagus	Male	2		chr12:g.95787058G>A	Missense	P156S	0.65	0.491	Tolerable	0.516	Damaging	MODHPOVEP: MODERATE, SIFT: deleterious - score 0.04, PolyPhen: possibly_damaging - score 0.61
EA	TCGA-FI-A2D5	TCGA-UCEC	Corpus uteri	Female	2		chr12:g.95787042G>A	Missense	A161V	0.87	0.767	Damaging	0.826	Damaging	MODHPRVEP: MODERATE, SIFT: deleterious - score 0, PolyPhen: probably_damaging - score 0.973
EA	TCGA-2W-A8YY	TCGA-CESC	Cervix uteri	Female	3		chr12:g.95787042G>A	Missense	A161V	0.87	0.767	Damaging	0.826	Damaging	MODHPRVEP: MODERATE, SIFT: deleterious - score 0, PolyPhen: probably_damaging - score 0.973
EA	TCGA-06-0185	TCGA-GBM	Brain	Male	1		chr12:g.95787034A>G	Missense	C164R	0.96	0.989	Damaging	0.947	Damaging	MODHPRVEP: MODERATE, SIFT: deleterious - score 0, PolyPhen: probably_damaging - score 1
AA	TCGA-06-A7TK	TCGA-GBM	Brain	Male	1		chr12:g.95787028C>T	Missense	A166T	0.26	0.246	Tolerable	0.112	Tolerable	MOTOBEVEP: MODERATE, SIFT: tolerated - score 0.07, PolyPhen: benign - score 0.013
AA	TCGA-AX-A2HC	TCGA-UCEC	Corpus uteri	Female	4		chr12:g.95786989C>T	Missense	A179T	0.61	0.444	Tolerable	0.39	Tolerable	MOTOPOVEP: MODERATE, SIFT: tolerated - score 0.05, PolyPhen: possibly_damaging - score 0.746
EA	TCGA-HT-A74H	TCGA-LGG	Brain	Male	1		chr12:g.95786989C>T	Missense	A179T	0.61	0.444	Tolerable	0.39	Tolerable	MOTOPOVEP: MODERATE, SIFT: tolerated - score 0.05, PolyPhen: possibly_damaging - score 0.746
EA	TCGA-19-5956	TCGA-GBM	Brain	Female	1		chr12:g.95786989C>T	Missense	A179T	0.61	0.444	Tolerable	0.39	Tolerable	MOTOPOVEP: MODERATE, SIFT: tolerated - score 0.05, PolyPhen: possibly_damaging - score 0.746
EA	TCGA-AA-3831	TCGA-COAD	Colon	Male	1		chr12:g.95738115G>T	Stop Gained	Y205*						HI----VEP: HIGH
EA	TCGA-21-1080	TCGA-LUSC	Bronchus and lung	Male	1		chr12:g.95738114C>T	Missense	D206N	0.13	0.054	Tolerable	0.116	Tolerable	MOTOBEVEP: MODERATE, SIFT: tolerated - score 0.47, PolyPhen: benign - score 0.001
EA	TCGA-IB-7651	TCGA-PAAD	Pancreas	Female	1		chr12:g.95738075G>T	Missense	L219M	0.74	0.667	Damaging	0.599	Damaging	MOTOPRVEP: MODERATE, SIFT: tolerated - score 0.07, PolyPhen: probably_damaging - score 1
EA	TCGA-52-7622	TCGA-LUSC	Bronchus and lung	Female	1		chr12:g.95738061G>T	Missense	N223K	0.65	0.334	Tolerable	0.526	Damaging	MODHPOVEP: MODERATE, SIFT: deleterious - score 0.02, PolyPhen: possibly_damaging - score 0.651
EA	TCGA-KQ-A41R	TCGA-BLCA	Bladder	Female	1		chr12:g.95738020T>C	Missense	Q237R	0.17	0.171	Tolerable	0.16	Tolerable	MOTOBEVEP: MODERATE, SIFT: tolerated - score 0.36, PolyPhen: benign - score 0.014
EA	TCGA-44-8119	TCGA-LUAD	Bronchus and lung	Male	1		chr12:g.95737979A>G	Missense	Y251H	0.96	0.739	Damaging	0.919	Damaging	MODHPRVEP: MODERATE, SIFT: deleterious - score 0, PolyPhen: probably_damaging - score 0.992
EA	TCGA-FR-A7U9	TCGA-SKCM	Skin	Female	1		chr12:g.95737952C>T	Missense	G260S	0.91	0.897	Damaging	0.892	Damaging	MODHPRVEP: MODERATE, SIFT: deleterious - score 0, PolyPhen: probably_damaging - score 1
EA	TCGA-GN-A266	TCGA-SKCM	Skin	Male	1	4（3.33%） V-1 domain（262-318）	chr12:g.95737943A>T	Missense	F263I	0.65	0.54	Damaging	0.215	Tolerable	MODHPOVEP: MODERATE, SIFT: deleterious - score 0.01, PolyPhen: possibly_damaging - score 0.555
EA	TCGA-91-6829	TCGA-LUAD	Bronchus and lung	Male	1		chr12:g.95737928C>G	Missense	A268P	0.96	0.959	Damaging	0.705	Damaging	MODHPRVEP: MODERATE, SIFT: deleterious - score 0, PolyPhen: probably_damaging - score 0.998
EA	TCGA-D3-A1Q4	TCGA-SKCM	Skin	Female	1		chr12:g.95737907G>A	Missense	H275Y	0.17	0.109	Tolerable	0.083	Tolerable	MOTOBEVEP: MODERATE, SIFT: tolerated - score 0.06, PolyPhen: benign - score 0.028
EA	TCGA-64-5774	TCGA-LUAD	Bronchus and lung	Male	1		chr12:g.95713289T>C	Missense	Q305R	0.61	0.45	Tolerable	0.382	Tolerable	MODHBEVEP: MODERATE, SIFT: deleterious - score 0, PolyPhen: benign - score 0.297
EA	TCGA-BA-A4IG	TCGA-HNSC	Oropharynx	Male	1	6（5%） linker（319-331）	chr12:g.95713245C>T	Missense	D320N	0.17	0.033	Tolerable	0.088	Tolerable	MOTOBEVEP: MODERATE, SIFT: tolerated - score 0.92, PolyPhen: benign - score 0.116
EA	TCGA-MV-A51V	TCGA-BLCA	Bladder	Male	1		chr12:g.95713236T>G	Missense	T323P	0.78	0.699	Damaging	0.385	Tolerable	MODHPRVEP: MODERATE, SIFT: deleterious - score 0, PolyPhen: probably_damaging - score 0.985
EA	TCGA-EO-A22U	TCGA-UCEC	Corpus uteri	Female	1		chr12:g.95713235G>A	Missense	T323M	0.7	0.265	Tolerable	0.243	Tolerable	MODHPOVEP: MODERATE, SIFT: deleterious - score 0.03, PolyPhen: possibly_damaging - score 0.833
EA	TCGA-MX-A5UJ	TCGA-STAD	Stomach	Female	1		chr12:g.95713230delC	Frameshift	A325Lfs*76						HI----VEP: HIGH
EA	TCGA-FW-A3R5	TCGA-SKCM	Skin	Male	4		chr12:g.95713221C>T	Missense	E328K	0.65	0.578	Damaging	0.407	Damaging	MOTOPOVEP: MODERATE, SIFT: tolerated - score 0.14, PolyPhen: possibly_damaging - score 0.845
EA	TCGA-FS-A1ZZ	TCGA-SKCM	Skin	Female	1		chr12:g.95713221C>T	Missense	E328K	0.65	0.578	Damaging	0.407	Damaging	MOTOPOVEP: MODERATE, SIFT: tolerated - score 0.14, PolyPhen: possibly_damaging - score 0.845
EA	TCGA-AP-A059	TCGA-UCEC	Corpus uteri	Female	4	18(15%) V-2 domain（332-383）	chr12:g.95710622C>A	Missense	K333N	0.39	0.262	Tolerable	0.129	Tolerable	MOTOPOVEP: MODERATE, SIFT: tolerated - score 0.15, PolyPhen: possibly_damaging - score 0.678
AA	TCGA-33-4533	TCGA-LUSC	Bronchus and lung	Female	1		chr12:g.95710614C>G	Missense	G336A	0.78	0.806	Damaging	0.384	Tolerable	MODHPRVEP: MODERATE, SIFT: deleterious - score 0, PolyPhen: probably_damaging - score 0.909
EA	TCGA-AB-2808	TCGA-LAML	Hematopoietic and reticuloendothelial systems	Male	1		chr12:g.95710600A>G	Missense	C341R	1	0.998	Damaging	0.935	Damaging	MODHPOVEP: MODERATE, SIFT: deleterious - score 0, PolyPhen: possibly_damaging - score 0.863
EA	TCGA-D3-A51G	TCGA-SKCM	Skin	Male	1		chr12:g.95710591C>T	Missense	D344N	0.7	0.118	Tolerable	0.438	Damaging	MODHBEVEP: MODERATE, SIFT: deleterious - score 0.03, PolyPhen: benign - score 0.179
EA	TCGA-2W-A8YY	TCGA-CESC	Cervix uteri	Female	3		chr12:g.95710588C>T	Missense	V345I	0.04	0.059	Tolerable	0.022	Tolerable	MOTOBEVEP: MODERATE, SIFT: tolerated - score 0.5, PolyPhen: benign - score 0.001
EA	TCGA-VQ-A8P2	TCGA-STAD	Stomach	Male	1		chr12:g.95710561G>A	Missense	R354C	0.78	0.74	Damaging	0.341	Tolerable	MOTOPOVEP: MODERATE, SIFT: tolerated - score 0.05, PolyPhen: possibly_damaging - score 0.832
NA	TCGA-YG-AA3N	TCGA-SKCM	Skin	Male	1		chr12:g.95710561G>A	Missense	R354C	0.78	0.74	Damaging	0.341	Tolerable	MOTOPOVEP: MODERATE, SIFT: tolerated - score 0.05, PolyPhen: possibly_damaging - score 0.832
EA	TCGA-D3-A8GO	TCGA-SKCM	Skin	Female	1		chr12:g.95710561G>A	Missense	R354C	0.78	0.74	Damaging	0.341	Tolerable	MOTOPOVEP: MODERATE, SIFT: tolerated - score 0.05, PolyPhen: possibly_damaging - score 0.832
EA	TCGA-OR-A5LE	TCGA-ACC	Adrenal gland	Male	1		chr12:g.95710560C>T	Missense	R354H	0.52	0.63	Damaging	0.298	Tolerable	MOTOBEVEP: MODERATE, SIFT: tolerated - score 0.16, PolyPhen: benign - score 0.032
EAA	TCGA-DD-AADF	TCGA-LIHC	Liver and intrahepatic bile ducts	Female	1		chr12:g.95710558T>C	Missense	S355G	0.57	0.481	Tolerable	0.288	Tolerable	MODHPOVEP: MODERATE, SIFT: deleterious - score 0, PolyPhen: possibly_damaging - score 0.482
EA	TCGA-UC-A7PG	TCGA-CESC	Cervix uteri	Female	2		chr12:g.95710540C>T	Missense	D361N	0.13	0.066	Tolerable	0.065	Tolerable	MOTOBEVEP: MODERATE, SIFT: tolerated - score 1, PolyPhen: benign - score 0.003
EA	TCGA-BT-A20R	TCGA-BLCA	Bladder	Female	1		chr12:g.95710487G>C	Missense	F378L	0.83	0.757	Damaging	0.639	Damaging	MODHBEVEP: MODERATE, SIFT: deleterious - score 0.02, PolyPhen: benign - score 0.262
EA	TCGA-EE-A2MT	TCGA-SKCM	Skin	Male	1		chr12:g.95710483G>A	Missense	R380C	0.91	0.9	Damaging	0.607	Damaging	MODHPRVEP: MODERATE, SIFT: deleterious - score 0, PolyPhen: probably_damaging - score 0.988
EA	TCGA-EE-A2A5	TCGA-SKCM	Skin	Male	1		chr12:g.95710483G>A	Missense	R380C	0.91	0.9	Damaging	0.607	Damaging	MODHPRVEP: MODERATE, SIFT: deleterious - score 0, PolyPhen: probably_damaging - score 0.988
EA	TCGA-DA-A95V	TCGA-SKCM	Skin	Female	1		chr12:g.95710480C>T	Missense	D381N	0.57	0.179	Tolerable	0.131	Tolerable	MOTOBEVEP: MODERATE, SIFT: tolerated - score 0.05, PolyPhen: benign - score 0.35
EA	TCGA-24-0970	TCGA-OV	Ovary	Female	1		chr12:g.95710480C>T	Missense	D381N	0.57	0.179	Tolerable	0.131	Tolerable	MOTOBEVEP: MODERATE, SIFT: tolerated - score 0.05, PolyPhen: benign - score 0.35
EA	TCGA-55-8620	TCGA-LUAD	Bronchus and lung	Male	1		chr12:g.95710479T>A	Missense	D381V	0.91	0.953	Damaging	0.69	Damaging	MODHPRVEP: MODERATE, SIFT: deleterious - score 0, PolyPhen: probably_damaging - score 0.976
EA	TCGA-AX-A2HD	TCGA-UCEC	Corpus uteri	Female	3		chr12:g.95710474G>A	Missense	R383W	0.48	0.587	Damaging	0.322	Tolerable	MODHPOVEP: MODERATE, SIFT: deleterious - score 0.01, PolyPhen: possibly_damaging - score 0.849
EA	TCGA-D1-A15X	TCGA-UCEC	Corpus uteri	Female	1	3(2.5%) linker （384-394）	chr12:g.95683711G>A	Missense	P394L	0.18	0.104	Tolerable	0.189	Tolerable	MOTOBEVEP: MODERATE, SIFT: tolerated - score 0.23, PolyPhen: benign - score 0.003
EA	TCGA-AA-A02W	TCGA-COAD	Colon	Female	1		chr12:g.95683711G>A	Missense	P394L	0.18	0.104	Tolerable	0.189	Tolerable	MOTOBEVEP: MODERATE, SIFT: tolerated - score 0.23, PolyPhen: benign - score 0.003
EA	TCGA-AA-A01R	TCGA-COAD	Colon	Male	1		chr12:g.95683711G>A	Missense	P394L	0.18	0.104	Tolerable	0.189	Tolerable	MOTOBEVEP: MODERATE, SIFT: tolerated - score 0.23, PolyPhen: benign - score 0.003
EA	TCGA-AG-A01N	TCGA-READ	Rectum	Female	1	10(8.3%) V-3 domain（395-443）	chr12:g.95683707A>C	Missense	C395W	0.87	0.98	Damaging	0.842	Damaging	MODHPRVEP: MODERATE, SIFT: deleterious - score 0, PolyPhen: probably_damaging - score 1
EA	TCGA-AA-3693	TCGA-COAD	Colon	Female	1		chr12:g.95683707A>C	Missense	C395W	0.87	0.98	Damaging	0.842	Damaging	MODHPRVEP: MODERATE, SIFT: deleterious - score 0, PolyPhen: probably_damaging - score 1
NA	TCGA-5L-AAT0	TCGA-BRCA	Breast	Female	3		chr12:g.95683688A>T	Missense	S402T	0.43	0.278	Tolerable	0.153	Tolerable	MOTOBEVEP: MODERATE, SIFT: tolerated - score 0.19, PolyPhen: benign - score 0.437
NA	TCGA-5L-AAT0	TCGA-BRCA	Breast	Female	3		chr12:g.95683687G>A	Missense	S402L	0.91	0.89	Damaging	0.615	Damaging	MODHPRVEP: MODERATE, SIFT: deleterious - score 0, PolyPhen: probably_damaging - score 0.969
EA	TCGA-06-1802	TCGA-GBM	Brain	Male	1		chr12:g.95683652delC	Frameshift	D414Tfs*56						HI----VEP: HIGH
EA	TCGA-D3-A8GI	TCGA-SKCM	Skin	Male	1		chr12:g.95683631G>A	Missense	P421S	0.48	0.382	Tolerable	0.105	Tolerable	MOTOBEVEP: MODERATE, SIFT: tolerated - score 0.4, PolyPhen: benign - score 0.326
EA	TCGA-A6-5665	TCGA-COAD	Colon	Female	1		chr12:g.95683607G>A	Stop Gained	R429*						HI----VEP: HIGH
EA	TCGA-BF-AAOX	TCGA-SKCM	Skin	Male	1		chr12:g.95683606C>T	Missense	R429Q	0.48	0.121	Tolerable	0.194	Tolerable	MOTOBEVEP: MODERATE, SIFT: tolerated - score 0.06, PolyPhen: benign - score 0.042
EA	TCGA-BR-8296	TCGA-STAD	Stomach	Female	1		chr12:g.95683591C>G	Missense	C434S	0.96	0.999	Damaging	0.935	Damaging	MODHPRVEP: MODERATE, SIFT: deleterious - score 0.03, PolyPhen: probably_damaging - score 0.919
EA	TCGA-EE-A2MR	TCGA-SKCM	Skin	Male	2		chr12:g.95683567C>T	Missense	G442E	0.74	0.649	Damaging	0.313	Tolerable	MODHPRVEP: MODERATE, SIFT: deleterious - score 0.01, PolyPhen: probably_damaging - score 0.943
EA	TCGA-A5-A0G1	TCGA-UCEC	Corpus uteri	Female	2	16（13.3%） linker(444-517)	chr12:g.95683553G>A	Stop Gained	R447*						HI----VEP: HIGH
EA	TCGA-DM-A1DB	TCGA-COAD	Colon	Male	1		chr12:g.95683537G>A	Missense	A452V	0.52	0.444	Tolerable	0.139	Tolerable	MOTOBEVEP: MODERATE, SIFT: tolerated - score 0.06, PolyPhen: benign - score 0.135
NA	TCGA-UF-A719	TCGA-HNSC	Floor of mouth	Male	1		chr12:g.95683524G>T	Missense	D456E	0.52	0.515	Damaging	0.153	Tolerable	MOTOBEVEP: MODERATE, SIFT: tolerated - score 0.06, PolyPhen: benign - score 0.333
AA	TCGA-BK-A13B	TCGA-UCEC	Corpus uteri	Female	1		chr12:g.95683523G>A	Missense	P457S	0.52	0.378	Tolerable	0.156	Tolerable	MOTOBEVEP: MODERATE, SIFT: tolerated - score 0.08, PolyPhen: benign - score 0.191
EA	TCGA-WE-A8ZT	TCGA-SKCM	Skin	Female	1		chr12:g.95683514C>T	Missense	G460R	0.83	0.933	Damaging	0.533	Damaging	MODHPRVEP: MODERATE, SIFT: deleterious - score 0, PolyPhen: probably_damaging - score 0.994
AA	TCGA-L9-A7SV	TCGA-LUAD	Bronchus and lung	Male	1		chr12:g.95683514C>A	Stop Gained	G460*						HI----VEP: HIGH
AA	TCGA-AX-A2HC	TCGA-UCEC	Corpus uteri	Female	4		chr12:g.95682815C>A	Missense	D468Y	0.57	0.85	Damaging	0.194	Tolerable	MOTOBEVEP: MODERATE, SIFT: tolerated - score 0.06, PolyPhen: benign - score 0.052
EAA	TCGA-DD-AAVX	TCGA-LIHC	Liver and intrahepatic bile ducts	Male	2		chr12:g.95682804C>G	Missense	W471C	0.43	0.919	Damaging	0.265	Tolerable	MOTOPOVEP: MODERATE, SIFT: tolerated - score 0.11, PolyPhen: possibly_damaging - score 0.497
EAA	TCGA-DD-AAVX	TCGA-LIHC	Liver and intrahepatic bile ducts	Male	2		chr12:g.95682803A>G	Missense	Y472H	0.09	0.266	Tolerable	0.085	Tolerable	MOTOBEVEP: MODERATE, SIFT: tolerated - score 0.5, PolyPhen: benign - score 0.001
EA	TCGA-19-5950	TCGA-GBM	Brain	Female	1		chr12:g.95682799T>G	Missense	H473P	0.3	0.646	Damaging	0.199	Tolerable	MOTOBEVEP: MODERATE, SIFT: tolerated - score 0.18, PolyPhen: benign - score 0.065
EA	TCGA-66-2783	TCGA-LUSC	Bronchus and lung	Male	1		chr12:g.95682761C>T	Missense	E486K	0.26	0.339	Tolerable	0.101	Tolerable	MOTOBEVEP: MODERATE, SIFT: tolerated - score 0.1, PolyPhen: benign - score 0.006
EA	TCGA-FW-A3R5	TCGA-SKCM	Skin	Male	4		chr12:g.95682744C>T	Stop Gained	W491*						HI----VEP: HIGH
AA	TCGA-B5-A3FC	TCGA-UCEC	Corpus uteri	Female	1		chr12:g.95682730C>A	Missense	G496V	0.52	0.925	Damaging	0.258	Tolerable	MOTOBEVEP: MODERATE, SIFT: tolerated - score 0.17, PolyPhen: benign - score 0.126
AA	TCGA-AJ-A6NU	TCGA-UCEC	Corpus uteri	Female	1		chr12:g.95670138C>T	Missense	E507K	0.52	0.651	Damaging	0.153	Tolerable	MOTOBEVEP: MODERATE, SIFT: tolerated - score 0.29, PolyPhen: benign - score 0.014
EA	TCGA-C5-A1ME	TCGA-CESC	Cervix uteri	Female	1		chr12:g.95670138C>A	Stop Gained	E507*						HI----VEP: HIGH
EA	TCGA-W3-AA1V	TCGA-SKCM	Skin	Male	1		chr12:g.95670129C>T	Missense	E510K	0.7	0.866	Damaging	0.237	Tolerable	MODHPOVEP: MODERATE, SIFT: deleterious - score 0, PolyPhen: possibly_damaging - score 0.899
EA	TCGA-AP-A1DK	TCGA-UCEC	Corpus uteri	Female	2	19（15.8%） NTR domain（518-621）	chr12:g.95670096C>A	Stop Gained	G521*						HI----VEP: HIGH
EA	TCGA-EE-A29E	TCGA-SKCM	Skin	Male	2		chr12:g.95670078C>T	Missense	V527M	0.74	0.72	Damaging	0.245	Tolerable	MODHPRVEP: MODERATE, SIFT: deleterious - score 0, PolyPhen: probably_damaging - score 0.979
EA	TCGA-EE-A29E	TCGA-SKCM	Skin	Male	2		chr12:g.95670077C>T	Splice Donor	X527_splice						HI----VEP: HIGH
EA	TCGA-75-6205	TCGA-LUAD	Bronchus and lung	Female	1		chr12:g.95665960A>G	Missense	S534P	0.61	0.941	Damaging	0.332	Tolerable	MODHPRVEP: MODERATE, SIFT: deleterious - score 0, PolyPhen: probably_damaging - score 0.962
EA	TCGA-AG-A02N	TCGA-READ	Rectum	Male	1		chr12:g.95665932T>C	Missense	E543G	0.74	0.807	Damaging	0.33	Tolerable	MODHPRVEP: MODERATE, SIFT: deleterious - score 0, PolyPhen: probably_damaging - score 0.999
EA	TCGA-DX-A8BH	TCGA-SARC	Connective, subcutaneous and other soft tissues	Male	1		chr12:g.95665930C>G	Missense	V544L	0.65	0.768	Damaging	0.17	Tolerable	MOTOPRVEP: MODERATE, SIFT: tolerated - score 0.06, PolyPhen: probably_damaging - score 1
AA	TCGA-AP-A0LM	TCGA-UCEC	Corpus uteri	Female	1		chr12:g.95665911T>G	Missense	K550T	0.74	0.678	Damaging	0.293	Tolerable	MODHPRVEP: MODERATE, SIFT: deleterious - score 0, PolyPhen: probably_damaging - score 1
EA	TCGA-28-1760	TCGA-GBM	Brain	Male	1		chr12:g.95665902T>A	Missense	K553I	0.7	0.534	Damaging	0.35	Tolerable	MODHPOVEP: MODERATE, SIFT: deleterious - score 0, PolyPhen: possibly_damaging - score 0.812
EA	TCGA-B5-A0JY	TCGA-UCEC	Corpus uteri	Female	1		chr12:g.95665882A>T	Missense	F560I	0.13	0.172	Tolerable	0.021	Tolerable	MOTOBEVEP: MODERATE, SIFT: tolerated - score 0.4, PolyPhen: benign - score 0.024
EA	TCGA-16-0848	TCGA-GBM	Brain	Male	1		chr12:g.95665879G>A	Stop Gained	R561*						HI----VEP: HIGH
AA	TCGA-LL-A7SZ	TCGA-BRCA	Breast	Female	1		chr12:g.95665879G>A	Stop Gained	R561*						HI----VEP: HIGH
EA	TCGA-2W-A8YY	TCGA-CESC	Cervix uteri	Female	3		chr12:g.95665870G>A	Stop Gained	R564*						HI----VEP: HIGH
EA	TCGA-C5-A7UE	TCGA-CESC	Cervix uteri	Female	1		chr12:g.95665855C>T	Missense	E569K	0.61	0.839	Damaging	0.28	Tolerable	MOTOPOVEP: MODERATE, SIFT: tolerated - score 0.06, PolyPhen: possibly_damaging - score 0.708
EA	TCGA-MA-AA41	TCGA-CESC	Cervix uteri	Female	1		chr12:g.95665843C>T	Missense	D573N	0.13	0.062	Tolerable	0.071	Tolerable	MOTOBEVEP: MODERATE, SIFT: tolerated - score 1, PolyPhen: benign - score 0.001
EA	TCGA-06-0219	TCGA-GBM	Brain	Male	1		chr12:g.95659196C>T	Missense	E593K	0.61	0.832	Damaging	0.273	Tolerable	MOTOPOVEP: MODERATE, SIFT: tolerated - score 0.05, PolyPhen: possibly_damaging - score 0.734
EA	TCGA-GN-A4U8	TCGA-SKCM	Skin	Male	1		chr12:g.95659161C>T	Missense	M604I	0.65	0.557	Damaging	0.21	Tolerable	MODHPRVEP: MODERATE, SIFT: deleterious - score 0.02, PolyPhen: probably_damaging - score 0.925
EA	TCGA-AP-A059	TCGA-UCEC	Corpus uteri	Female	4		chr12:g.95659155G>T	Missense	S606R	0.65	0.91	Damaging	0.523	Damaging	MODHPRVEP: MODERATE, SIFT: deleterious - score 0, PolyPhen: probably_damaging - score 1
EA	TCGA-AZ-6598	TCGA-COAD	Colon	Female	1		chr12:g.95659135G>T	Missense	P613H	0.7	0.516	Damaging	0.267	Tolerable	MODHPRVEP: MODERATE, SIFT: deleterious - score 0.01, PolyPhen: probably_damaging - score 0.93
EA	TCGA-F5-6814	TCGA-READ	Rectum	Male	1		chr12:g.95659130G>A	Missense	L615F	0.65	0.802	Damaging	0.149	Tolerable	MOTOPRVEP: MODERATE, SIFT: tolerated - score 0.07, PolyPhen: probably_damaging - score 0.976
EAA	TCGA-CA-6717	TCGA-COAD	Colon	Male	1	1（0.83%） linker（622-628）	chr12:g.95659099C>A	Missense	R625I	0.43	0.574	Damaging	0.118	Tolerable	MOTOBEVEP: MODERATE, SIFT: tolerated - score 0.07, PolyPhen: benign - score 0.007

## Sheet: NTN5（33）
Genetic Ancestry Groups	Case ID	Project	Primary Site	Gender	# Mutations	Percentage of mutation	DNA Change	Type	Consequences	damaging score	VEST3	Prediction(VEST3)	REVEL	Prediction(REVEL)	Impact
EAA	TCGA-E7-A7XN	TCGA-BLCA	Bladder	Male	1	12(36.4%) linker (1-156)	chr19:g.48670926C>G	Missense	D21H	0.17	0.125	Tolerable	0.086	Tolerable	MOTOBEVEP: MODERATE, SIFT: tolerated - score 0.22, PolyPhen: benign - score 0.019
EA	TCGA-NC-A5HK	TCGA-LUSC	Bronchus and lung	Female	1		chr19:g.48670920G>T	Missense	Q23K	0.04	0.115	Tolerable	0.034	Tolerable	MOTOBEVEP: MODERATE, SIFT: tolerated - score 0.18, PolyPhen: benign - score 0.034
EA	TCGA-D5-6930	TCGA-COAD	Colon	Male	1		chr19:g.48670913C>T	Missense	R25H	0	0.098	Tolerable	0.002	Tolerable	MOTOBEVEP: MODERATE, SIFT: tolerated - score 0.16, PolyPhen: benign - score 0.002
EA	TCGA-A6-6780	TCGA-COAD	Colon	Male	1		chr19:g.48670872C>T	Missense	V39M	0	0.013	Tolerable	0.012	Tolerable	MOTOBEVEP: MODERATE, SIFT: tolerated - score 0.26, PolyPhen: benign - score 0.003
EA	TCGA-68-7756	TCGA-LUSC	Bronchus and lung	Male	1		chr19:g.48670845C>A	Missense	A48S	0	0.079	Tolerable	0.009	Tolerable	MOTOBEVEP: MODERATE, SIFT: tolerated - score 0.69, PolyPhen: benign - score 0.002
EA	TCGA-VQ-A8PX	TCGA-STAD	Stomach	Male	1		chr19:g.48670818C>T	Missense	A57T	0	0.021	Tolerable	0.002	Tolerable	MOTOBEVEP: MODERATE, SIFT: tolerated - score 0.44, PolyPhen: benign - score 0.01
EA	TCGA-66-2787	TCGA-LUSC	Bronchus and lung	Male	1		chr19:g.48670808_48670809insT	Frameshift	T60Nfs*60						HI----VEP: HIGH
EAA	TCGA-FB-A7DR	TCGA-PAAD	Pancreas	Male	1		chr19:g.48670746G>A	Missense	R81C	0.61	0.772	Damaging	0.262	Tolerable	MODHPOVEP: MODERATE, SIFT: deleterious - score 0, PolyPhen: possibly_damaging - score 0.863
EA	TCGA-F4-6570	TCGA-COAD	Colon	Female	1		chr19:g.48670739C>T	Missense	C83Y	0.52	0.898	Damaging	0.309	Tolerable	MODHPOVEP: MODERATE, SIFT: deleterious - score 0, PolyPhen: possibly_damaging - score 0.855
EA	TCGA-T2-A6X2	TCGA-HNSC	Gum	Male	1		chr19:g.48670632C>T	Missense	E119K	0.04	0.227	Tolerable	0.015	Tolerable	MOTOBEVEP: MODERATE, SIFT: tolerated - score 0.09, PolyPhen: benign - score 0.011
EA	TCGA-W3-AA21	TCGA-SKCM	Skin	Male	1		chr19:g.48670605C>T	Missense	G128S	0.09	0.154	Tolerable	0.031	Tolerable	MOTOBEVEP: MODERATE, SIFT: tolerated - score 0.42, PolyPhen: benign - score 0.045
AA	TCGA-51-4079	TCGA-LUSC	Bronchus and lung	Female	1		chr19:g.48670587C>A	Missense	A134S	0.04	0.081	Tolerable	0.077	Tolerable	MODHBEVEP: MODERATE, SIFT: deleterious - score 0.02, PolyPhen: benign - score 0.1
AA	TCGA-AY-A69D	TCGA-COAD	Colon	Female	1	1（3%） V-1 domain（157-199）	chr19:g.48670455G>A	Missense	R178C	0.61	0.7	Damaging	0.391	Tolerable	MODHPRVEP: MODERATE, SIFT: deleterious - score 0, PolyPhen: probably_damaging - score 0.958
EA	TCGA-D3-A3MU	TCGA-SKCM	Skin	Male	1	1（3%） linker（200-211）	chr19:g.48670365G>A	Missense	P208S	0.22	0.288	Tolerable	0.086	Tolerable	MOTOBEVEP: MODERATE, SIFT: tolerated - score 0.13, PolyPhen: benign - score 0.113
EAA	TCGA-AJ-A3EL	TCGA-UCEC	Corpus uteri	Female	1	6(18.2%) V-2 domain（212-264）	chr19:g.48664743C>T	Missense	R219Q	0.39	0.39	Tolerable	0.189	Tolerable	MODHBEVEP: MODERATE, SIFT: deleterious - score 0.03, PolyPhen: benign - score 0.062
EA	TCGA-CM-5861	TCGA-COAD	Colon	Female	1		chr19:g.48664741G>A	Missense	R220C	0.74	0.772	Damaging	0.395	Tolerable	MODHPRVEP: MODERATE, SIFT: deleterious - score 0, PolyPhen: probably_damaging - score 0.946
EA	TCGA-EE-A2A2	TCGA-SKCM	Skin	Male	1		chr19:g.48664702C>T	Missense	G233S	0.39	0.64	Damaging	0.298	Tolerable	MOTOPRVEP: MODERATE, SIFT: tolerated - score 0.55, PolyPhen: probably_damaging - score 0.994
EA	TCGA-FI-A2D0	TCGA-UCEC	Corpus uteri	Female	1		chr19:g.48664678G>A	Missense	R241W	0.61	0.729	Damaging	0.327	Tolerable	MODHPRVEP: MODERATE, SIFT: deleterious - score 0.01, PolyPhen: probably_damaging - score 0.941
EA	TCGA-F7-A624	TCGA-HNSC	Other and unspecified parts of mouth	Male	1		chr19:g.48664654G>A	Missense	R249W	0.83	0.644	Damaging	0.542	Damaging	MODHPRVEP: MODERATE, SIFT: deleterious - score 0, PolyPhen: probably_damaging - score 0.99
EA	TCGA-KK-A59Y	TCGA-PRAD	Prostate gland	Male	1		chr19:g.48664622C>A	Missense	W259C	0.52	0.92	Damaging	0.445	Damaging	MODHPRVEP: MODERATE, SIFT: deleterious - score 0.01, PolyPhen: probably_damaging - score 0.943
NA	TCGA-AJ-A3EK	TCGA-UCEC	Corpus uteri	Female	2	1(3%) linker（265-274）	chr19:g.48664581C>G	Missense	R273T	0.39	0.666	Damaging	0.174	Tolerable	MODHBEVEP: MODERATE, SIFT: deleterious - score 0.03, PolyPhen: benign - score 0.343
EA	TCGA-78-8662	TCGA-LUAD	Bronchus and lung	Female	1	2(6%) v-3 domain(275-317)	chr19:g.48664275T>C	Missense	I280V	0.17	0.383	Tolerable	0.102	Tolerable	MOTOBEVEP: MODERATE, SIFT: tolerated - score 1, PolyPhen: benign - score 0.058
EA	TCGA-A5-A0G1	TCGA-UCEC	Corpus uteri	Female	1		chr19:g.48664239C>A	Missense	G292W	0.91	0.926	Damaging	0.856	Damaging	MODHPRVEP: MODERATE, SIFT: deleterious - score 0, PolyPhen: probably_damaging - score 0.999
EA	TCGA-18-3409	TCGA-LUSC	Bronchus and lung	Male	1	6(18.2%) linker (318-361)	chr19:g.48663808G>A	Missense	P326L	0.26	0.348	Tolerable	0.104	Tolerable	MODHBEVEP: MODERATE, SIFT: deleterious - score 0.03, PolyPhen: benign - score 0.059
EA	TCGA-AP-A059	TCGA-UCEC	Corpus uteri	Female	1		chr19:g.48663797T>A	Missense	T330S	0.17	0.141	Tolerable	0.111	Tolerable	MOTOPOVEP: MODERATE, SIFT: tolerated - score 0.63, PolyPhen: possibly_damaging - score 0.888
EA	TCGA-CM-6162	TCGA-COAD	Colon	Female	1		chr19:g.48663776C>A	Missense	G337C	0.04	0.173	Tolerable	0.062	Tolerable	MOTOPOVEP: MODERATE, SIFT: tolerated - score 0.17, PolyPhen: possibly_damaging - score 0.503
EA	TCGA-EE-A2GM	TCGA-SKCM	Skin	Female	1		chr19:g.48663760C>A	Splice Donor	X342_splice						HI----VEP: HIGH
EAA	TCGA-EO-A3B0	TCGA-UCEC	Corpus uteri	Female	1		chr19:g.48663759A>G	Splice Donor	X342_splice						HI----VEP: HIGH
EA	TCGA-FS-A1ZA	TCGA-SKCM	Skin	Female	1		chr19:g.48663513G>A	Missense	S352L	0.57	0.437	Tolerable	0.307	Tolerable	MODHPOVEP: MODERATE, SIFT: deleterious - score 0.02, PolyPhen: possibly_damaging - score 0.787
EA	TCGA-B5-A0JY	TCGA-UCEC	Corpus uteri	Female	1	1(3%) NTR domain（362-468）	chr19:g.48663487G>A	Missense	R361W	0.22	0.167	Tolerable	0.061	Tolerable	MODHBEVEP: MODERATE, SIFT: deleterious - score 0.05, PolyPhen: benign - score 0.007
EA	TCGA-DI-A1BU	TCGA-UCEC	Corpus uteri	Female	1	3(9.1%) linker (469-489)	chr19:g.48662041A>G	Missense	V369A	0.32	0.266	Tolerable	0.145	Tolerable	MOTOPOVEP: MODERATE, SIFT: tolerated - score 0.74, PolyPhen: possibly_damaging - score 0.771
EA	TCGA-EY-A215	TCGA-UCEC	Corpus uteri	Female	3		chr19:g.48662035C>T	Missense	R371H	0	0.073	Tolerable	0.019	Tolerable	MOTOBEVEP: MODERATE, SIFT: tolerated - score 0.55, PolyPhen: benign - score 0.006
EA	TCGA-D3-A8GP	TCGA-SKCM	Skin	Male	1		chr19:g.48661685C>T	Missense	E488K	0.04	0.148	Tolerable	0.018	Tolerable	MOTLBEVEP: MODERATE, SIFT: tolerated_low_confidence - score 0.25, PolyPhen: benign - score 0.004

## Sheet: NTNG1（161）
Genetic Ancestry Groups	Case ID	Project	Primary Site	Gender	# Mutations	Percentage of mutation	DNA Change	Type	Consequences	damaging score	VEST3	Prediction(VEST3)	REVEL	Prediction(REVEL)	Impact
EA	TCGA-OR-A5K5	TCGA-ACC	Adrenal gland	Female	1	30(18.6%) linker (1-68)	chr1:g.107148611C>A	Missense	F6L	0.17	0.221	Tolerable	0.038	Tolerable	MOTLBEVEP: MODERATE, SIFT: tolerated_low_confidence - score 0.85, PolyPhen: benign - score 0.004
AA	TCGA-EY-A1GU	TCGA-UCEC	Corpus uteri	Female	2		chr1:g.107148616C>T	Missense	S8L	0.48	0.627	Damaging	0.168	Tolerable	MODLBEVEP: MODERATE, SIFT: deleterious_low_confidence - score 0.03, PolyPhen: benign - score 0.029
EAA	TCGA-AJ-A3EL	TCGA-UCEC	Corpus uteri	Female	1		chr1:g.107148616C>T	Missense	S8L	0.48	0.627	Damaging	0.168	Tolerable	MODLBEVEP: MODERATE, SIFT: deleterious_low_confidence - score 0.03, PolyPhen: benign - score 0.029
EAA	TCGA-EO-A3AV	TCGA-UCEC	Corpus uteri	Female	2		chr1:g.107148616C>T	Missense	S8L	0.48	0.627	Damaging	0.168	Tolerable	MODLBEVEP: MODERATE, SIFT: deleterious_low_confidence - score 0.03, PolyPhen: benign - score 0.029
EA	TCGA-YD-A89C	TCGA-SKCM	Skin	Female	1		chr1:g.107148627C>T	Missense	L12F	0.57	0.504	Damaging	0.125	Tolerable	MOTLPOVEP: MODERATE, SIFT: tolerated_low_confidence - score 0.06, PolyPhen: possibly_damaging - score 0.899
EA	TCGA-29-1694	TCGA-OV	Ovary	Female	1		chr1:g.107148631G>A	Stop Gained	W13*						HI----VEP: HIGH
EA	TCGA-HF-7133	TCGA-STAD	Stomach	Female	1		chr1:g.107148631G>A	Stop Gained	W13*						HI----VEP: HIGH
EA	TCGA-ER-A197	TCGA-SKCM	Skin	Female	1		chr1:g.107148633G>A	Missense	V14I	0.52	0.328	Tolerable	0.06	Tolerable	MOTLBEVEP: MODERATE, SIFT: tolerated_low_confidence - score 0.1, PolyPhen: benign - score 0.23
EA	TCGA-VQ-A8P3	TCGA-STAD	Stomach	Male	1		chr1:g.107148634T>G	Missense	V14G	0.57	0.809	Damaging	0.228	Tolerable	MODLBEVEP: MODERATE, SIFT: deleterious_low_confidence - score 0, PolyPhen: benign - score 0.23
EA	TCGA-CG-4449	TCGA-STAD	Stomach	Male	1		chr1:g.107148640T>A	Missense	V16E	0.61	0.899	Damaging	0.486	Damaging	MODHPRVEP: MODERATE, SIFT: deleterious - score 0, PolyPhen: probably_damaging - score 0.929
EA	TCGA-DA-A1I5	TCGA-SKCM	Skin	Female	2		chr1:g.107148643C>T	Missense	S17F	0.52	0.669	Damaging	0.218	Tolerable	MODHPOVEP: MODERATE, SIFT: deleterious - score 0.03, PolyPhen: possibly_damaging - score 0.737
AA	TCGA-G4-6309	TCGA-COAD	Colon	Female	1		chr1:g.107148654C>G	Missense	Q21E	0.7	0.789	Damaging	0.299	Tolerable	MOTOPRVEP: MODERATE, SIFT: tolerated - score 0.06, PolyPhen: probably_damaging - score 0.983
EA	TCGA-63-A5MU	TCGA-LUSC	Bronchus and lung	Male	1		chr1:g.107148655A>G	Missense	Q21R	0.74	0.938	Damaging	0.487	Damaging	MOTOPRVEP: MODERATE, SIFT: tolerated - score 0.09, PolyPhen: probably_damaging - score 0.989
EA	TCGA-BH-A0BQ	TCGA-BRCA	Breast	Female	1		chr1:g.107148674G>T	Missense	W27C	0.74	0.955	Damaging	0.511	Damaging	MODHPRVEP: MODERATE, SIFT: deleterious - score 0.03, PolyPhen: probably_damaging - score 0.971
EA	TCGA-BG-A222	TCGA-UCEC	Corpus uteri	Female	2		chr1:g.107148682A>G	Missense	Y30C	0.78	0.931	Damaging	0.722	Damaging	MODHPRVEP: MODERATE, SIFT: deleterious - score 0, PolyPhen: probably_damaging - score 0.999
EA	TCGA-EE-A181	TCGA-SKCM	Skin	Female	1		chr1:g.107148684G>A	Missense	D31N	0.7	0.269	Tolerable	0.38	Tolerable	MODHPRVEP: MODERATE, SIFT: deleterious - score 0.01, PolyPhen: probably_damaging - score 0.991
EA	TCGA-ER-A19O	TCGA-SKCM	Skin	Male	1		chr1:g.107148685A>G	Missense	D31G	0.78	0.95	Damaging	0.76	Damaging	MODHPRVEP: MODERATE, SIFT: deleterious - score 0.03, PolyPhen: probably_damaging - score 0.996
EA	TCGA-DM-A1HB	TCGA-COAD	Colon	Male	1		chr1:g.107148711G>A	Missense	E40K	0.57	0.497	Tolerable	0.186	Tolerable	MODHBEVEP: MODERATE, SIFT: deleterious - score 0.05, PolyPhen: benign - score 0.243
EA	TCGA-EB-A431	TCGA-SKCM	Skin	Male	1		chr1:g.107148718G>A	Missense	G42E	0.74	0.641	Damaging	0.523	Damaging	MODHPRVEP: MODERATE, SIFT: deleterious - score 0.01, PolyPhen: probably_damaging - score 0.968
EA	TCGA-97-7938	TCGA-LUAD	Bronchus and lung	Female	1		chr1:g.107148743delC	Frameshift	Q51Sfs*7						HI----VEP: HIGH
EA	TCGA-L9-A444	TCGA-LUAD	Bronchus and lung	Female	1		chr1:g.107148748C>A	Missense	P52Q	0.87	0.946	Damaging	0.85	Damaging	MODHPRVEP: MODERATE, SIFT: deleterious - score 0, PolyPhen: probably_damaging - score 1
EA	TCGA-55-8208	TCGA-LUAD	Bronchus and lung	Female	1		chr1:g.107148754C>A	Missense	S54Y	0.57	0.471	Tolerable	0.183	Tolerable	MODHPOVEP: MODERATE, SIFT: deleterious - score 0.01, PolyPhen: possibly_damaging - score 0.901
EA	TCGA-22-A5C4	TCGA-LUSC	Bronchus and lung	Male	1		chr1:g.107148760A>T	Missense	D56V	0.74	0.987	Damaging	0.693	Damaging	MODHPRVEP: MODERATE, SIFT: deleterious - score 0.02, PolyPhen: probably_damaging - score 1
EA	TCGA-B7-A5TJ	TCGA-STAD	Stomach	Male	1		chr1:g.107148779A>T	Missense	K62N	0.48	0.13	Tolerable	0.087	Tolerable	MOTOPOVEP: MODERATE, SIFT: tolerated - score 0.07, PolyPhen: possibly_damaging - score 0.635
EAA	TCGA-VQ-A8E2	TCGA-STAD	Stomach	Male	1		chr1:g.107148783A>G	Missense	K64E	0.39	0.311	Tolerable	0.194	Tolerable	MODHBEVEP: MODERATE, SIFT: deleterious - score 0.02, PolyPhen: benign - score 0.437
EA	TCGA-EE-A29M	TCGA-SKCM	Skin	Female	1		chr1:g.107148789G>A	Missense	D66N	0.65	0.25	Tolerable	0.236	Tolerable	MODHPRVEP: MODERATE, SIFT: deleterious - score 0, PolyPhen: probably_damaging - score 0.999
NA	TCGA-A5-A1OF	TCGA-UCEC	Corpus uteri	Female	2		chr1:g.107148793C>A	Missense	P67H	0.87	0.882	Damaging	0.667	Damaging	MODHPRVEP: MODERATE, SIFT: deleterious - score 0, PolyPhen: probably_damaging - score 1
EAA	TCGA-BS-A0UV	TCGA-UCEC	Corpus uteri	Female	1		chr1:g.107148796C>T	Missense	P68L	0.78	0.903	Damaging	0.645	Damaging	MODHPRVEP: MODERATE, SIFT: deleterious - score 0.01, PolyPhen: probably_damaging - score 1
EAA	TCGA-HU-A4GQ	TCGA-STAD	Stomach	Male	1		chr1:g.107148796C>T	Missense	P68L	0.78	0.903	Damaging	0.645	Damaging	MODHPRVEP: MODERATE, SIFT: deleterious - score 0.01, PolyPhen: probably_damaging - score 1
EA	TCGA-O2-A5IB	TCGA-LUSC	Bronchus and lung	Female	1		chr1:g.107148796C>T	Missense	P68L	0.78	0.903	Damaging	0.645	Damaging	MODHPRVEP: MODERATE, SIFT: deleterious - score 0.01, PolyPhen: probably_damaging - score 1
EA	TCGA-55-5899	TCGA-LUAD	Bronchus and lung	Male	2	74（46%） VI domain（69-295）	chr1:g.107148798G>T	Missense	D69Y	0.7	0.673	Damaging	0.5	Damaging	MODHPRVEP: MODERATE, SIFT: deleterious - score 0, PolyPhen: probably_damaging - score 0.975
EA	TCGA-BR-8360	TCGA-STAD	Stomach	Male	1		chr1:g.107148801A>G	Missense	I70V	0.48	0.388	Tolerable	0.36	Tolerable	MODHBEVEP: MODERATE, SIFT: deleterious - score 0.05, PolyPhen: benign - score 0.392
EA	TCGA-EE-A182	TCGA-SKCM	Skin	Female	1		chr1:g.107148819C>T	Missense	P76S	0.87	0.779	Damaging	0.768	Damaging	MODHPRVEP: MODERATE, SIFT: deleterious - score 0.01, PolyPhen: probably_damaging - score 0.999
EA	TCGA-AA-3510	TCGA-COAD	Colon	Male	1		chr1:g.107148830C>A	Missense	F79L	0.7	0.525	Damaging	0.581	Damaging	MODHBEVEP: MODERATE, SIFT: deleterious - score 0.04, PolyPhen: benign - score 0.02
EA	TCGA-78-7155	TCGA-LUAD	Bronchus and lung	Male	2		chr1:g.107148840G>C	Splice Donor	X82_splice						HI----VEP: HIGH
EA	TCGA-61-1740	TCGA-OV	Ovary	Female	1		chr1:g.107324277delCATAGGGC…	Splice Acceptor	X83_splice						HI----VEP: HIGH
EA	TCGA-06-1802	TCGA-GBM	Brain	Male	1		chr1:g.107324292A>G	Missense	Y86C	0.87	0.905	Damaging	0.762	Damaging	MODHPRVEP: MODERATE, SIFT: deleterious - score 0.03, PolyPhen: probably_damaging - score 1
EA	TCGA-04-1331	TCGA-OV	Ovary	Female	1		chr1:g.107324296G>A	Missense	M87I	0.65	0.868	Damaging	0.432	Damaging	MODHPOVEP: MODERATE, SIFT: deleterious - score 0.01, PolyPhen: possibly_damaging - score 0.907
EA	TCGA-A6-4105	TCGA-COAD	Colon	Male	1		chr1:g.107324298G>T	Missense	C88F	0.87	0.981	Damaging	0.735	Damaging	MODHPRVEP: MODERATE, SIFT: deleterious - score 0, PolyPhen: probably_damaging - score 1
EA	TCGA-55-8620	TCGA-LUAD	Bronchus and lung	Male	1		chr1:g.107324306G>C	Missense	E91Q	0.65	0.736	Damaging	0.406	Damaging	MODHPRVEP: MODERATE, SIFT: deleterious - score 0.03, PolyPhen: probably_damaging - score 0.994
AA	TCGA-B5-A3FC	TCGA-UCEC	Corpus uteri	Female	5		chr1:g.107324316C>T	Missense	A94V	0.87	0.816	Damaging	0.714	Damaging	MODHPRVEP: MODERATE, SIFT: deleterious - score 0, PolyPhen: probably_damaging - score 0.998
AA	TCGA-AJ-A8CW	TCGA-UCEC	Corpus uteri	Female	1		chr1:g.107324338delC	Frameshift	P103Lfs*3						HI----VEP: HIGH
EA	TCGA-GN-A4U4	TCGA-SKCM	Skin	Male	1		chr1:g.107324363G>A	Missense	E110K	0.65	0.868	Damaging	0.496	Damaging	MODHPOVEP: MODERATE, SIFT: deleterious - score 0, PolyPhen: possibly_damaging - score 0.905
EA	TCGA-DF-A2KU	TCGA-UCEC	Corpus uteri	Female	2		chr1:g.107324375C>T	Missense	P114S	0.65	0.734	Damaging	0.323	Tolerable	MOTOPRVEP: MODERATE, SIFT: tolerated - score 0.06, PolyPhen: probably_damaging - score 0.998
EAA	TCGA-ZJ-A8QR	TCGA-CESC	Cervix uteri	Female	1		chr1:g.107324408G>C	Missense	E125Q	0.22	0.107	Tolerable	0.155	Tolerable	MODHBEVEP: MODERATE, SIFT: deleterious - score 0.02, PolyPhen: benign - score 0.139
AA	TCGA-VQ-A8DZ	TCGA-STAD	Stomach	Male	1		chr1:g.107324433A>C	Missense	N133T	0.74	0.52	Damaging	0.551	Damaging	MODHPRVEP: MODERATE, SIFT: deleterious - score 0, PolyPhen: probably_damaging - score 1
EAA	TCGA-A5-A0G2	TCGA-UCEC	Corpus uteri	Female	6		chr1:g.107324445C>A	Missense	S137Y	0.74	0.7	Damaging	0.586	Damaging	MODHPOVEP: MODERATE, SIFT: deleterious - score 0.03, PolyPhen: possibly_damaging - score 0.585
EA	TCGA-NC-A5HR	TCGA-LUSC	Bronchus and lung	Female	1		chr1:g.107324452C>G	Missense	S139R	0.43	0.418	Tolerable	0.207	Tolerable	MODHPOVEP: MODERATE, SIFT: deleterious - score 0, PolyPhen: possibly_damaging - score 0.56
EA	TCGA-85-8481	TCGA-LUSC	Bronchus and lung	Male	1		chr1:g.107324486A>T	Missense	T151S	0.65	0.776	Damaging	0.57	Damaging	MODHPRVEP: MODERATE, SIFT: deleterious - score 0.05, PolyPhen: probably_damaging - score 0.998
EA	TCGA-69-8255	TCGA-LUAD	Bronchus and lung	Male	1		chr1:g.107324498G>T	Missense	G155W	0.87	0.919	Damaging	0.818	Damaging	MODHPRVEP: MODERATE, SIFT: deleterious - score 0, PolyPhen: probably_damaging - score 1
EAA	TCGA-HU-8602	TCGA-STAD	Stomach	Female	1		chr1:g.107324501C>T	Missense	R156C	0.96	0.951	Damaging	0.946	Damaging	MODHPRVEP: MODERATE, SIFT: deleterious - score 0, PolyPhen: probably_damaging - score 1
EA	TCGA-BR-6452	TCGA-STAD	Stomach	Female	3		chr1:g.107324517T>C	Missense	I161T	0.7	0.7	Damaging	0.635	Damaging	MODHPRVEP: MODERATE, SIFT: deleterious - score 0, PolyPhen: probably_damaging - score 0.977
EA	TCGA-BS-A0VI	TCGA-UCEC	Corpus uteri	Female	1		chr1:g.107324526A>C	Missense	K164T	0.91	0.889	Damaging	0.882	Damaging	MODHPRVEP: MODERATE, SIFT: deleterious - score 0, PolyPhen: probably_damaging - score 1
EA	TCGA-D7-A4YX	TCGA-STAD	Stomach	Male	1		chr1:g.107324543C>T	Stop Gained	R170*						HI----VEP: HIGH
EA	TCGA-43-2581	TCGA-LUSC	Bronchus and lung	Female	3		chr1:g.107324544G>T	Missense	R170L	0.57	0.659	Damaging	0.32	Tolerable	MODHPRVEP: MODERATE, SIFT: deleterious - score 0, PolyPhen: probably_damaging - score 0.928
EA	TCGA-AP-A1DK	TCGA-UCEC	Corpus uteri	Female	1		chr1:g.107324561C>T	Stop Gained	Q176*						HI----VEP: HIGH
EA	TCGA-ER-A194	TCGA-SKCM	Skin	Male	1		chr1:g.107324576G>A	Missense	D181N	0.65	0.177	Tolerable	0.434	Damaging	MODHPRVEP: MODERATE, SIFT: deleterious - score 0, PolyPhen: probably_damaging - score 1
AA	TCGA-EO-A22R	TCGA-UCEC	Corpus uteri	Female	3		chr1:g.107324604C>A	Missense	P190H	0.83	0.859	Damaging	0.624	Damaging	MODHPRVEP: MODERATE, SIFT: deleterious - score 0, PolyPhen: probably_damaging - score 0.999
EA	TCGA-B5-A11E	TCGA-UCEC	Corpus uteri	Female	4		chr1:g.107324610C>T	Missense	S192F	0.65	0.706	Damaging	0.399	Tolerable	MODHPRVEP: MODERATE, SIFT: deleterious - score 0.01, PolyPhen: probably_damaging - score 0.992
EA	TCGA-56-8628	TCGA-LUSC	Bronchus and lung	Male	1		chr1:g.107324628A>G	Missense	Q198R	0.39	0.32	Tolerable	0.355	Tolerable	MOTOBEVEP: MODERATE, SIFT: tolerated - score 0.44, PolyPhen: benign - score 0.288
EA	TCGA-AA-3984	TCGA-COAD	Colon	Female	1		chr1:g.107324634C>T	Missense	T200M	0.74	0.671	Damaging	0.574	Damaging	MODHPRVEP: MODERATE, SIFT: deleterious - score 0.01, PolyPhen: probably_damaging - score 0.985
EA	TCGA-69-7978	TCGA-LUAD	Bronchus and lung	Male	1		chr1:g.107324636G>T	Missense	V201F	0.52	0.53	Damaging	0.425	Damaging	MOTOPRVEP: MODERATE, SIFT: tolerated - score 0.07, PolyPhen: probably_damaging - score 0.913
EAA	TCGA-BS-A0UF	TCGA-UCEC	Corpus uteri	Female	1		chr1:g.107324649T>C	Missense	I205T	0.87	0.94	Damaging	0.857	Damaging	MODHPRVEP: MODERATE, SIFT: deleterious - score 0, PolyPhen: probably_damaging - score 1
EA	TCGA-BR-8487	TCGA-STAD	Stomach	Female	1		chr1:g.107324664A>G	Missense	Y210C	0.96	0.878	Damaging	0.895	Damaging	MODHPRVEP: MODERATE, SIFT: deleterious - score 0, PolyPhen: probably_damaging - score 1
EA	TCGA-55-A492	TCGA-LUAD	Bronchus and lung	Female	1		chr1:g.107324699C>T	Missense	H222Y	0.39	0.418	Tolerable	0.379	Tolerable	MODHPOVEP: MODERATE, SIFT: deleterious - score 0.01, PolyPhen: possibly_damaging - score 0.753
EA	TCGA-97-7937	TCGA-LUAD	Bronchus and lung	Male	1		chr1:g.107324706A>T	Missense	E224V	0.83	0.802	Damaging	0.748	Damaging	MODHPRVEP: MODERATE, SIFT: deleterious - score 0, PolyPhen: probably_damaging - score 1
EA	TCGA-GM-A2DD	TCGA-BRCA	Breast	Female	1		chr1:g.107324709T>A	Missense	I225N	0.87	0.837	Damaging	0.747	Damaging	MODHPRVEP: MODERATE, SIFT: deleterious - score 0, PolyPhen: probably_damaging - score 0.999
EA	TCGA-EJ-5504	TCGA-PRAD	Prostate gland	Male	1		chr1:g.107324724C>T	Missense	A230V	0.83	0.809	Damaging	0.404	Damaging	MODHPRVEP: MODERATE, SIFT: deleterious - score 0.02, PolyPhen: probably_damaging - score 1
EA	TCGA-AG-A016	TCGA-READ	Rectum	Male	1		chr1:g.107324724C>T	Missense	A230V	0.83	0.809	Damaging	0.404	Damaging	MODHPRVEP: MODERATE, SIFT: deleterious - score 0.02, PolyPhen: probably_damaging - score 1
EA	TCGA-CM-5861	TCGA-COAD	Colon	Female	1		chr1:g.107324726delT	Frameshift	F232Lfs*31						HI----VEP: HIGH
EA	TCGA-F5-6814	TCGA-READ	Rectum	Male	3		chr1:g.107324729T>G	Missense	F232V	0.78	0.839	Damaging	0.448	Damaging	MODHPRVEP: MODERATE, SIFT: deleterious - score 0, PolyPhen: probably_damaging - score 0.988
EAA	TCGA-CA-6718	TCGA-COAD	Colon	Male	1		chr1:g.107324741C>A	Missense	R236S	0.17	0.397	Tolerable	0.176	Tolerable	MOTOBEVEP: MODERATE, SIFT: tolerated - score 0.19, PolyPhen: benign - score 0.39
EA	TCGA-49-4488	TCGA-LUAD	Bronchus and lung	Female	1		chr1:g.107324744C>A	Missense	L237I	0.65	0.365	Tolerable	0.441	Damaging	MODHPRVEP: MODERATE, SIFT: deleterious - score 0, PolyPhen: probably_damaging - score 0.968
AA	TCGA-B5-A3FC	TCGA-UCEC	Corpus uteri	Female	5		chr1:g.107324747C>T	Missense	R238C	0.74	0.63	Damaging	0.499	Damaging	MODHPRVEP: MODERATE, SIFT: deleterious - score 0.01, PolyPhen: probably_damaging - score 0.92
EA	TCGA-BR-7851	TCGA-STAD	Stomach	Male	1		chr1:g.107324747C>T	Missense	R238C	0.74	0.63	Damaging	0.499	Damaging	MODHPRVEP: MODERATE, SIFT: deleterious - score 0.01, PolyPhen: probably_damaging - score 0.92
EA	TCGA-AD-6899	TCGA-COAD	Colon	Male	1		chr1:g.107324747C>T	Missense	R238C	0.74	0.63	Damaging	0.499	Damaging	MODHPRVEP: MODERATE, SIFT: deleterious - score 0.01, PolyPhen: probably_damaging - score 0.92
EA	TCGA-FP-8099	TCGA-STAD	Stomach	Male	1		chr1:g.107324748G>A	Missense	R238H	0.35	0.152	Tolerable	0.167	Tolerable	MOTOBEVEP: MODERATE, SIFT: tolerated - score 0.63, PolyPhen: benign - score 0.004
EA	TCGA-44-A4SS	TCGA-LUAD	Bronchus and lung	Male	1		chr1:g.107324754T>C	Missense	M240T	0.65	0.954	Damaging	0.625	Damaging	MODHPRVEP: MODERATE, SIFT: deleterious - score 0.04, PolyPhen: probably_damaging - score 0.96
EA	TCGA-FS-A1ZP	TCGA-SKCM	Skin	Male	1		chr1:g.107324760C>T	Missense	S242F	0.78	0.962	Damaging	0.582	Damaging	MODHPRVEP: MODERATE, SIFT: deleterious - score 0, PolyPhen: probably_damaging - score 1
AA	TCGA-B5-A11U	TCGA-UCEC	Corpus uteri	Female	1		chr1:g.107324766A>G	Missense	Y244C	0.87	0.928	Damaging	0.65	Damaging	MODHPRVEP: MODERATE, SIFT: deleterious - score 0, PolyPhen: probably_damaging - score 1
EA	TCGA-BR-6802	TCGA-STAD	Stomach	Male	1		chr1:g.107324766A>G	Missense	Y244C	0.87	0.928	Damaging	0.65	Damaging	MODHPRVEP: MODERATE, SIFT: deleterious - score 0, PolyPhen: probably_damaging - score 1
EA	TCGA-56-8622	TCGA-LUSC	Bronchus and lung	Male	1		chr1:g.107324796G>A	Missense	R254K	0.43	0.245	Tolerable	0.221	Tolerable	MOTOBEVEP: MODERATE, SIFT: tolerated - score 0.51, PolyPhen: benign - score 0.273
EA	TCGA-BT-A42E	TCGA-BLCA	Bladder	Male	1		chr1:g.107324796G>C	Missense	R254T	0.78	0.73	Damaging	0.688	Damaging	MODHPRVEP: MODERATE, SIFT: deleterious - score 0, PolyPhen: probably_damaging - score 0.987
EA	TCGA-60-2714	TCGA-LUSC	Bronchus and lung	Female	1		chr1:g.107324818C>A	Missense	D261E	0.61	0.751	Damaging	0.592	Damaging	MODHPRVEP: MODERATE, SIFT: deleterious - score 0, PolyPhen: probably_damaging - score 0.999
EA	TCGA-EE-A29B	TCGA-SKCM	Skin	Male	1		chr1:g.107324823G>A	Missense	R263K	0.78	0.851	Damaging	0.65	Damaging	MODHPRVEP: MODERATE, SIFT: deleterious - score 0, PolyPhen: probably_damaging - score 0.998
EA	TCGA-D3-A8GM	TCGA-SKCM	Skin	Male	1		chr1:g.107324838G>A	Missense	R268K	0.48	0.428	Tolerable	0.311	Tolerable	MOTOBEVEP: MODERATE, SIFT: tolerated - score 0.21, PolyPhen: benign - score 0.068
EA	TCGA-EI-6506	TCGA-READ	Rectum	Female	1		chr1:g.107324846G>A	Missense	V271I	0.26	0.08	Tolerable	0.19	Tolerable	MOTOBEVEP: MODERATE, SIFT: tolerated - score 0.17, PolyPhen: benign - score 0.022
EA	TCGA-2J-AAB4	TCGA-PAAD	Pancreas	Male	1		chr1:g.107324846G>A	Missense	V271I	0.26	0.08	Tolerable	0.19	Tolerable	MOTOBEVEP: MODERATE, SIFT: tolerated - score 0.17, PolyPhen: benign - score 0.022
EA	TCGA-F4-6569	TCGA-COAD	Colon	Male	1		chr1:g.107324846G>A	Missense	V271I	0.26	0.08	Tolerable	0.19	Tolerable	MOTOBEVEP: MODERATE, SIFT: tolerated - score 0.17, PolyPhen: benign - score 0.022
EA	TCGA-37-3792	TCGA-LUSC	Bronchus and lung	Male	1		chr1:g.107324849G>T	Missense	G272W	0.87	0.93	Damaging	0.764	Damaging	MODHPRVEP: MODERATE, SIFT: deleterious - score 0, PolyPhen: probably_damaging - score 1
EA	TCGA-EE-A2MM	TCGA-SKCM	Skin	Female	2		chr1:g.107324850G>A	Missense	G272E	0.83	0.955	Damaging	0.647	Damaging	MODHPRVEP: MODERATE, SIFT: deleterious - score 0, PolyPhen: probably_damaging - score 0.998
EA	TCGA-DI-A1BU	TCGA-UCEC	Corpus uteri	Female	2		chr1:g.107324853A>G	Missense	E273G	0.39	0.324	Tolerable	0.318	Tolerable	MOTOBEVEP: MODERATE, SIFT: tolerated - score 1, PolyPhen: benign - score 0.177
EA	TCGA-XF-A9SY	TCGA-BLCA	Bladder	Female	1		chr1:g.107324862T>C	Missense	V276A	0.65	0.864	Damaging	0.527	Damaging	MODHPRVEP: MODERATE, SIFT: deleterious - score 0.04, PolyPhen: probably_damaging - score 0.995
EA	TCGA-UY-A9PD	TCGA-BLCA	Bladder	Male	1		chr1:g.107324862T>C	Missense	V276A	0.65	0.864	Damaging	0.527	Damaging	MODHPRVEP: MODERATE, SIFT: deleterious - score 0.04, PolyPhen: probably_damaging - score 0.995
EAA	TCGA-93-8067	TCGA-LUAD	Bronchus and lung	Male	1		chr1:g.107324864G>A	Missense	D277N	0.74	0.204	Tolerable	0.405	Damaging	MOTOPRVEP: MODERATE, SIFT: tolerated - score 0.16, PolyPhen: probably_damaging - score 0.999
EA	TCGA-C5-A1BI	TCGA-CESC	Cervix uteri	Female	1		chr1:g.107324867G>A	Missense	E278K	0.57	0.752	Damaging	0.37	Tolerable	MOTOBEVEP: MODERATE, SIFT: tolerated - score 0.1, PolyPhen: benign - score 0.302
EA	TCGA-DF-A2KU	TCGA-UCEC	Corpus uteri	Female	2		chr1:g.107324879G>A	Missense	A282T	0.3	0.162	Tolerable	0.182	Tolerable	MOTOBEVEP: MODERATE, SIFT: tolerated - score 0.37, PolyPhen: benign - score 0.043
EA	TCGA-CG-5721	TCGA-STAD	Stomach	Male	1		chr1:g.107324883G>A	Missense	R283H	0.74	0.707	Damaging	0.676	Damaging	MODHPRVEP: MODERATE, SIFT: deleterious - score 0.03, PolyPhen: probably_damaging - score 0.995
EA	TCGA-AA-3947	TCGA-COAD	Colon	Female	1		chr1:g.107324883G>A	Missense	R283H	0.74	0.707	Damaging	0.676	Damaging	MODHPRVEP: MODERATE, SIFT: deleterious - score 0.03, PolyPhen: probably_damaging - score 0.995
EA	TCGA-CN-A497	TCGA-HNSC	Larynx	Male	1		chr1:g.107324892A>G	Missense	Y286C	0.96	0.949	Damaging	0.913	Damaging	MODHPRVEP: MODERATE, SIFT: deleterious - score 0, PolyPhen: probably_damaging - score 1
EA	TCGA-13-1481	TCGA-OV	Ovary	Female	1		chr1:g.107324893C>G	Stop Gained	Y286*						HI----VEP: HIGH
EA	TCGA-60-2706	TCGA-LUSC	Bronchus and lung	Male	1		chr1:g.107324893C>G	Stop Gained	Y286*						HI----VEP: HIGH
EA	TCGA-KK-A7B4	TCGA-PRAD	Prostate gland	Male	1		chr1:g.107324915C>T	Stop Gained	R294*						HI----VEP: HIGH
EA	TCGA-D3-A3MU	TCGA-SKCM	Skin	Male	1		chr1:g.107324919G>A	Missense	G295E	0.91	0.965	Damaging	0.796	Damaging	MODHPRVEP: MODERATE, SIFT: deleterious - score 0.01, PolyPhen: probably_damaging - score 1
EA	TCGA-05-4427	TCGA-LUAD	Bronchus and lung	Female	1	13（8.1%） V-1 domain（297-341）	chr1:g.107395155T>A	Missense	C297S	0.96	0.944	Damaging	0.981	Damaging	MOTOPOVEP: MODERATE, SIFT: tolerated - score 0.06, PolyPhen: possibly_damaging - score 0.689
EA	TCGA-CG-4465	TCGA-STAD	Stomach	Female	1		chr1:g.107395177C>T	Missense	T304I	0.57	0.526	Damaging	0.306	Tolerable	MODHBEVEP: MODERATE, SIFT: deleterious - score 0.01, PolyPhen: benign - score 0.372
EA	TCGA-44-3918	TCGA-LUAD	Bronchus and lung	Female	1		chr1:g.107395179G>C	Missense	V305L	0.17	0.101	Tolerable	0.058	Tolerable	MOTOBEVEP: MODERATE, SIFT: tolerated - score 0.86, PolyPhen: benign - score 0.01
EA	TCGA-78-7155	TCGA-LUAD	Bronchus and lung	Male	2		chr1:g.107395199C>A	Missense	S311R	0.3	0.286	Tolerable	0.024	Tolerable	MODHBEVEP: MODERATE, SIFT: deleterious - score 0.02, PolyPhen: benign - score 0.151
AA	TCGA-A5-A7WJ	TCGA-UCEC	Corpus uteri	Female	1		chr1:g.107395227A>G	Missense	T321A	0.78	0.863	Damaging	0.659	Damaging	MODHBEVEP: MODERATE, SIFT: deleterious - score 0.03, PolyPhen: benign - score 0.324
EA	TCGA-BQ-5880	TCGA-KIRP	Kidney	Male	1		chr1:g.107395228C>A	Missense	T321N	0.91	0.58	Damaging	0.697	Damaging	MODHPRVEP: MODERATE, SIFT: deleterious - score 0, PolyPhen: probably_damaging - score 0.981
EA	TCGA-33-6737	TCGA-LUSC	Bronchus and lung	Male	1		chr1:g.107395236C>G	Missense	P324A	0.48	0.536	Damaging	0.181	Tolerable	MOTOBEVEP: MODERATE, SIFT: tolerated - score 0.16, PolyPhen: benign - score 0.026
EA	TCGA-DA-A1I5	TCGA-SKCM	Skin	Female	2		chr1:g.107395236C>T	Missense	P324S	0.57	0.555	Damaging	0.19	Tolerable	MOTOBEVEP: MODERATE, SIFT: tolerated - score 0.14, PolyPhen: benign - score 0.279
EA	TCGA-55-A4DG	TCGA-LUAD	Bronchus and lung	Male	1		chr1:g.107395265T>A	Stop Gained	Y333*						HI----VEP: HIGH
EA	TCGA-AP-A1DV	TCGA-UCEC	Corpus uteri	Female	2		chr1:g.107395273G>A	Missense	R336Q	0.43	0.228	Tolerable	0.169	Tolerable	MOTOBEVEP: MODERATE, SIFT: tolerated - score 0.1, PolyPhen: benign - score 0.097
AA	TCGA-EY-A1GU	TCGA-UCEC	Corpus uteri	Female	2		chr1:g.107395273G>A	Missense	R336Q	0.43	0.228	Tolerable	0.169	Tolerable	MOTOBEVEP: MODERATE, SIFT: tolerated - score 0.1, PolyPhen: benign - score 0.097
EAA	TCGA-EO-A3B0	TCGA-UCEC	Corpus uteri	Female	3		chr1:g.107395276C>A	Missense	P337H	0.83	0.546	Damaging	0.491	Damaging	MODHPRVEP: MODERATE, SIFT: deleterious - score 0.02, PolyPhen: probably_damaging - score 0.912
EA	TCGA-58-8388	TCGA-LUSC	Bronchus and lung	Male	1		chr1:g.107395285C>G	Missense	P340R	0.52	0.511	Damaging	0.172	Tolerable	MODHPOVEP: MODERATE, SIFT: deleterious - score 0.04, PolyPhen: possibly_damaging - score 0.654
EAA	TCGA-DD-AACV	TCGA-LIHC	Liver and intrahepatic bile ducts	Male	1	6(1.3%) linker (342-363)	chr1:g.107395302A>G	Missense	I346V	0.39	0.32	Tolerable	0.097	Tolerable	MOTOBEVEP: MODERATE, SIFT: tolerated - score 0.09, PolyPhen: benign - score 0.011
EA	TCGA-BT-A20O	TCGA-BLCA	Bladder	Male	1		chr1:g.107395311G>C	Missense	G349R	0.78	0.942	Damaging	0.558	Damaging	MODHPRVEP: MODERATE, SIFT: deleterious - score 0, PolyPhen: probably_damaging - score 0.987
EA	TCGA-93-7348	TCGA-LUAD	Bronchus and lung	Female	1		chr1:g.107395312G>A	Missense	G349D	0.7	0.943	Damaging	0.586	Damaging	MODHPRVEP: MODERATE, SIFT: deleterious - score 0, PolyPhen: probably_damaging - score 0.943
EA	TCGA-EB-A430	TCGA-SKCM	Skin	Male	1		chr1:g.107407697C>T	Missense	S359F	0.55	0.85	Damaging	0.308	Tolerable	MODHBEVEP: MODERATE, SIFT: deleterious - score 0.05, PolyPhen: benign - score 0.035
EA	TCGA-BR-8361	TCGA-STAD	Stomach	Female	1		chr1:g.107407702_107407703insT	Frameshift	G362Wfs*2						HI----VEP: HIGH
EA	TCGA-EE-A2MT	TCGA-SKCM	Skin	Male	1		chr1:g.107407703T>G	Missense	I361S	0.45	0.867	Damaging	0.219	Tolerable	MOTOBEVEP: MODERATE, SIFT: tolerated - score 0.24, PolyPhen: benign - score 0.004
EA	TCGA-AA-3845	TCGA-COAD	Colon	Female	1	8（7.2%） V-2 domain（364-417）	chr1:g.107430765G>A	Missense	G368D	0.52	0.889	Damaging	0.419	Damaging	MOTOBEVEP: MODERATE, SIFT: tolerated - score 0.21, PolyPhen: benign - score 0.098
EA	TCGA-AP-A1E0	TCGA-UCEC	Corpus uteri	Female	2		chr1:g.107430806G>T	Missense	V382F	0.52	0.579	Damaging	0.207	Tolerable	MODHBEVEP: MODERATE, SIFT: deleterious - score 0.03, PolyPhen: benign - score 0.295
EA	TCGA-50-5946	TCGA-LUAD	Bronchus and lung	Male	1		chr1:g.107430812T>C	Missense	C384R	0.91	0.999	Damaging	0.935	Damaging	MODHBEVEP: MODERATE, SIFT: deleterious - score 0.02, PolyPhen: benign - score 0.014
EA	TCGA-AX-A3G8	TCGA-UCEC	Corpus uteri	Female	1		chr1:g.107430815G>A	Missense	V385M	0.52	0.771	Damaging	0.332	Tolerable	MODHPOVEP: MODERATE, SIFT: deleterious - score 0.03, PolyPhen: possibly_damaging - score 0.677
EA	TCGA-EY-A1GQ	TCGA-UCEC	Corpus uteri	Female	1		chr1:g.107430824A>G	Missense	K388E	0.57	0.765	Damaging	0.322	Tolerable	MODHPOVEP: MODERATE, SIFT: deleterious - score 0.01, PolyPhen: possibly_damaging - score 0.634
EA	TCGA-Z2-A8RT	TCGA-SKCM	Skin	Female	1		chr1:g.107430851G>A	Missense	E397K	0.7	0.608	Damaging	0.406	Damaging	MODHBEVEP: MODERATE, SIFT: deleterious - score 0.02, PolyPhen: benign - score 0.186
EAA	TCGA-HU-A4GH	TCGA-STAD	Stomach	Male	1		chr1:g.107430852A>C	Missense	E397A	0.52	0.686	Damaging	0.409	Damaging	MOTOBEVEP: MODERATE, SIFT: tolerated - score 0.09, PolyPhen: benign - score 0.186
AA	TCGA-55-7725	TCGA-LUAD	Bronchus and lung	Female	1		chr1:g.107430899G>A	Missense	D413N	0.52	0.2	Tolerable	0.28	Tolerable	MODHPOVEP: MODERATE, SIFT: deleterious - score 0.04, PolyPhen: possibly_damaging - score 0.697
EA	TCGA-BR-6452	TCGA-STAD	Stomach	Female	3	2（7.2%） linker（418-419）	chr1:g.107430916A>G	Missense	I418M	0.43	0.63	Damaging	0.204	Tolerable	MOTOBEVEP: MODERATE, SIFT: tolerated - score 0.07, PolyPhen: benign - score 0.095
EA	TCGA-56-8625	TCGA-LUSC	Bronchus and lung	Female	1		chr1:g.107436664G>A	Splice Acceptor	X419_splice						HI----VEP: HIGH
EA	TCGA-GV-A3QI	TCGA-BLCA	Bladder	Male	1	12(9.8%) V-3 domain（420-457）	chr1:g.107436671A>T	Missense	Y421F	0.35	0.233	Tolerable	0.118	Tolerable	MOTOBEVEP: MODERATE, SIFT: tolerated - score 0.16, PolyPhen: benign - score 0.001
NA	TCGA-VQ-A924	TCGA-STAD	Stomach	Male	1		chr1:g.107436694C>T	Missense	H429Y	0.43	0.478	Tolerable	0.373	Tolerable	MOTOBEVEP: MODERATE, SIFT: tolerated - score 0.3, PolyPhen: benign - score 0
EA	TCGA-FW-A3R5	TCGA-SKCM	Skin	Male	2		chr1:g.107436694C>T	Missense	H429Y	0.43	0.478	Tolerable	0.373	Tolerable	MOTOBEVEP: MODERATE, SIFT: tolerated - score 0.3, PolyPhen: benign - score 0
EA	TCGA-55-8085	TCGA-LUAD	Bronchus and lung	Male	1		chr1:g.107436694C>T	Missense	H429Y	0.43	0.478	Tolerable	0.373	Tolerable	MOTOBEVEP: MODERATE, SIFT: tolerated - score 0.3, PolyPhen: benign - score 0
EA	TCGA-AP-A1E0	TCGA-UCEC	Corpus uteri	Female	2		chr1:g.107436700C>T	Missense	R431C	0.78	0.859	Damaging	0.496	Damaging	MODHBEVEP: MODERATE, SIFT: deleterious - score 0.02, PolyPhen: benign - score 0.006
EA	TCGA-AG-A002	TCGA-READ	Rectum	Male	1		chr1:g.107436700C>T	Missense	R431C	0.78	0.859	Damaging	0.496	Damaging	MODHBEVEP: MODERATE, SIFT: deleterious - score 0.02, PolyPhen: benign - score 0.006
EA	TCGA-05-4410	TCGA-LUAD	Bronchus and lung	Male	1		chr1:g.107436705T>A	Stop Gained	C432*						HI----VEP: HIGH
EA	TCGA-IQ-A61J	TCGA-HNSC	Other and unspecified parts of tongue	Male	1		chr1:g.107436745G>A	Missense	G446R	0.91	0.94	Damaging	0.797	Damaging	MODHUNVEP: MODERATE, SIFT: deleterious - score 0, PolyPhen: unknown - score 0
EA	TCGA-85-8353	TCGA-LUSC	Bronchus and lung	Male	1		chr1:g.107436755G>A	Missense	C449Y	0.91	0.997	Damaging	0.926	Damaging	MODHBEVEP: MODERATE, SIFT: deleterious - score 0, PolyPhen: benign - score 0.126
AA	TCGA-B5-A3FC	TCGA-UCEC	Corpus uteri	Female	5		chr1:g.107436757G>A	Missense	D450N	0.43	0.15	Tolerable	0.196	Tolerable	MODHUNVEP: MODERATE, SIFT: deleterious - score 0.04, PolyPhen: unknown - score 0
AA	TCGA-A6-5661	TCGA-COAD	Colon	Female	1		chr1:g.107436769C>T	Missense	P454S	0.61	0.574	Damaging	0.362	Tolerable	MOTOUNVEP: MODERATE, SIFT: tolerated - score 0.06, PolyPhen: unknown - score 0
EA	TCGA-HZ-A4BH	TCGA-PAAD	Pancreas	Male	1		chr1:g.107436770C>T	Missense	P454L	0.65	0.609	Damaging	0.384	Tolerable	MODHUNVEP: MODERATE, SIFT: deleterious - score 0.01, PolyPhen: unknown - score 0
EA	TCGA-EE-A3AG	TCGA-SKCM	Skin	Male	1	16(9.9%) linker (458-539)	chr1:g.107436790G>C	Missense	G461R	0.74	0.9	Damaging	0.556	Damaging	MODHUNVEP: MODERATE, SIFT: deleterious - score 0.02, PolyPhen: unknown - score 0
EA	TCGA-B5-A0JZ	TCGA-UCEC	Corpus uteri	Female	1		chr1:g.107436799C>T	Missense	P464S	0.45	0.274	Tolerable	0.16	Tolerable	MOTOBEVEP: MODERATE, SIFT: tolerated - score 0.25, PolyPhen: benign - score 0.019
EA	TCGA-VQ-A8P2	TCGA-STAD	Stomach	Male	2		chr1:g.107480611C>T	Missense	P464L	0.55	0.501	Damaging	0.32	Tolerable	MODHBEVEP: MODERATE, SIFT: deleterious - score 0.01, PolyPhen: benign - score 0.217
EA	TCGA-CV-A6JE	TCGA-HNSC	Other and unspecified parts of mouth	Male	1		chr1:g.107480623delACA	Inframe Deletion	N469del						MO----VEP: MODERATE
AA	TCGA-QG-A5Z2	TCGA-COAD	Colon	Male	1		chr1:g.107480637C>T	Missense	H473Y	0.48	0.439	Tolerable	0.428	Damaging	MOTOBEVEP: MODERATE, SIFT: tolerated - score 0.76, PolyPhen: benign - score 0.296
EA	TCGA-75-7025	TCGA-LUAD	Bronchus and lung	Male	1		chr1:g.107480684C>G	Missense	C488W	0.65	0.986	Damaging	0.865	Damaging	MODHPRVEP: MODERATE, SIFT: deleterious - score 0, PolyPhen: probably_damaging - score 0.999
EA	TCGA-FD-A3B6	TCGA-BLCA	Bladder	Male	1		chr1:g.107480691G>T	Missense	A491S	0.35	0.376	Tolerable	0.27	Tolerable	MOTOBEVEP: MODERATE, SIFT: tolerated - score 0.15, PolyPhen: benign - score 0.044
EA	TCGA-L5-A88W	TCGA-ESCA	Esophagus	Male	1		chr1:g.107480721C>T	Missense	R501W	0.78	0.678	Damaging	0.544	Damaging	MODHPRVEP: MODERATE, SIFT: deleterious - score 0.01, PolyPhen: probably_damaging - score 0.918
EA	TCGA-D7-A4Z0	TCGA-STAD	Stomach	Female	1		chr1:g.107480728A>G	Missense	E503G	0.52	0.514	Damaging	0.234	Tolerable	MODHPOVEP: MODERATE, SIFT: deleterious - score 0.02, PolyPhen: possibly_damaging - score 0.49
EA	TCGA-BR-8382	TCGA-STAD	Stomach	Female	1		chr1:g.107480744C>A	Stop Gained	C508*						HI----VEP: HIGH
EA	TCGA-55-8506	TCGA-LUAD	Bronchus and lung	Female	1		chr1:g.107480760C>A	Missense	Q514K	0.22	0.313	Tolerable	0.088	Tolerable	MOTOBEVEP: MODERATE, SIFT: tolerated - score 0.64, PolyPhen: benign - score 0.066
EA	TCGA-97-A4M0	TCGA-LUAD	Bronchus and lung	Female	1		chr1:g.107480763G>T	Missense	G515C	0.48	0.414	Tolerable	0.274	Tolerable	MOTOPOVEP: MODERATE, SIFT: tolerated - score 0.28, PolyPhen: possibly_damaging - score 0.592
NA	TCGA-A5-A0VQ	TCGA-UCEC	Corpus uteri	Female	1		chr1:g.107480766G>A	Missense	A516T	0.13	0.177	Tolerable	0.07	Tolerable	MOTOBEVEP: MODERATE, SIFT: tolerated - score 0.12, PolyPhen: benign - score 0.425
EA	TCGA-G4-6586	TCGA-COAD	Colon	Female	1		chr1:g.107480767C>T	Missense	A516V	0.39	0.207	Tolerable	0.184	Tolerable	MOTOPOVEP: MODERATE, SIFT: tolerated - score 0.14, PolyPhen: possibly_damaging - score 0.588
EA	TCGA-DI-A1BU	TCGA-UCEC	Corpus uteri	Female	2		chr1:g.107480779G>A	Missense	G520D	0.09	0.302	Tolerable	0.092	Tolerable	MOTOBEVEP: MODERATE, SIFT: tolerated - score 0.24, PolyPhen: benign - score 0
EA	TCGA-OR-A5KB	TCGA-ACC	Adrenal gland	Female	2		chr1:g.107480809T>A	Missense	L530Q	0.48	0.504	Damaging	0.392	Tolerable	MODHUNVEP: MODERATE, SIFT: deleterious - score 0.01, PolyPhen: unknown - score 0

## Sheet: NTNG2（98）
Genetic Ancestry Groups	Case ID	Project	Primary Site	Gender	# Mutations	Percentage of mutation	DNA Change	Type	Consequences	damaging score	VEST3	Prediction(VEST3)	REVEL	Prediction(REVEL)	Impact
EA	TCGA-FI-A2D5	TCGA-UCEC	Corpus uteri	Female	1	7(7.1%) linker (1-56)	chr9:g.132166865C>A	Missense	L12I	0.35	0.162	Tolerable	0.041	Tolerable	MOTOUNVEP: MODERATE, SIFT: tolerated - score 0.24, PolyPhen: unknown - score 0
AA	TCGA-C5-A1MH	TCGA-CESC	Cervix uteri	Female	1		chr9:g.132166916G>C	Missense	D29H	0.74	0.666	Damaging	0.512	Damaging	MODHPRVEP: MODERATE, SIFT: deleterious - score 0, PolyPhen: probably_damaging - score 0.944
EA	TCGA-12-0778	TCGA-GBM	Brain	Male	1		chr9:g.132166919G>C	Missense	E30Q	0.52	0.244	Tolerable	0.066	Tolerable	MODHBEVEP: MODERATE, SIFT: deleterious - score 0.01, PolyPhen: benign - score 0.138
EA	TCGA-CG-5721	TCGA-STAD	Stomach	Male	1		chr9:g.132166937T>C	Missense	F36L	0.52	0.461	Tolerable	0.09	Tolerable	MODHBEVEP: MODERATE, SIFT: deleterious - score 0.04, PolyPhen: benign - score 0.063
EA	TCGA-AA-A00N	TCGA-COAD	Colon	Male	1		chr9:g.132166964C>T	Missense	R45C	0.43	0.46	Tolerable	0.167	Tolerable	MODHPOVEP: MODERATE, SIFT: deleterious - score 0.02, PolyPhen: possibly_damaging - score 0.787
EA	TCGA-K4-A83P	TCGA-BLCA	Bladder	Male	1		chr9:g.132166972delG	Frameshift	D48Tfs*5						HI----VEP: HIGH
AA	TCGA-44-7669	TCGA-LUAD	Bronchus and lung	Male	1		chr9:g.132166998C>T	Missense	P56L	0.78	0.889	Damaging	0.432	Damaging	MODHPRVEP: MODERATE, SIFT: deleterious - score 0, PolyPhen: probably_damaging - score 1
EA	TCGA-AA-3492	TCGA-COAD	Colon	Female	1	54（55.1%） VI domain（57-284）	chr9:g.132167003G>T	Missense	G58C	0.74	0.636	Damaging	0.351	Tolerable	MODHPRVEP: MODERATE, SIFT: deleterious - score 0, PolyPhen: probably_damaging - score 0.988
EA	TCGA-FW-A3R5	TCGA-SKCM	Skin	Male	2		chr9:g.132167015G>A	Missense	G62R	0.91	0.908	Damaging	0.847	Damaging	MODHPRVEP: MODERATE, SIFT: deleterious - score 0, PolyPhen: probably_damaging - score 1
EA	TCGA-AD-6895	TCGA-COAD	Colon	Male	1		chr9:g.132167020delC	Frameshift	P65Lfs*69						HI----VEP: HIGH
EA	TCGA-FU-A23L	TCGA-CESC	Cervix uteri	Female	1		chr9:g.132167035C>G	Missense	F68L	0.7	0.668	Damaging	0.684	Damaging	MODHBEVEP: MODERATE, SIFT: deleterious - score 0.04, PolyPhen: benign - score 0.147
EA	TCGA-90-A4ED	TCGA-LUSC	Bronchus and lung	Male	1		chr9:g.132197966G>A	Missense	E72K	0.74	0.91	Damaging	0.575	Damaging	MOTOPRVEP: MODERATE, SIFT: tolerated - score 0.06, PolyPhen: probably_damaging - score 0.946
EAA	TCGA-BR-8680	TCGA-STAD	Stomach	Male	1		chr9:g.132197987A>G	Missense	N79D	0.26	0.069	Tolerable	0.24	Tolerable	MOTOBEVEP: MODERATE, SIFT: tolerated - score 0.69, PolyPhen: benign - score 0.002
EA	TCGA-NC-A5HI	TCGA-LUSC	Bronchus and lung	Female	1		chr9:g.132198029A>G	Missense	R93G	0.17	0.438	Tolerable	0.302	Tolerable	MOTOBEVEP: MODERATE, SIFT: tolerated - score 0.1, PolyPhen: benign - score 0.003
EA	TCGA-56-8625	TCGA-LUSC	Bronchus and lung	Female	1		chr9:g.132198072G>A	Stop Gained	W107*						HI----VEP: HIGH
EA	TCGA-IG-A5B8	TCGA-ESCA	Esophagus	Male	1		chr9:g.132198086T>C	Missense	W112R	0.91	0.971	Damaging	0.885	Damaging	MODHPRVEP: MODERATE, SIFT: deleterious - score 0, PolyPhen: probably_damaging - score 1
EA	TCGA-DJ-A3VM	TCGA-THCA	Thyroid gland	Female	1		chr9:g.132198093G>T	Missense	R114L	0.83	0.944	Damaging	0.529	Damaging	MODHPRVEP: MODERATE, SIFT: deleterious - score 0.01, PolyPhen: probably_damaging - score 0.913
EAA	TCGA-A5-A0G2	TCGA-UCEC	Corpus uteri	Female	1		chr9:g.132198129C>T	Missense	S126L	0.78	0.656	Damaging	0.67	Damaging	MODHPRVEP: MODERATE, SIFT: deleterious - score 0, PolyPhen: probably_damaging - score 0.959
EA	TCGA-D7-A6EZ	TCGA-STAD	Stomach	Male	1		chr9:g.132198139G>C	Missense	K129N	0.83	0.325	Tolerable	0.738	Damaging	MODHPRVEP: MODERATE, SIFT: deleterious - score 0, PolyPhen: probably_damaging - score 1
AA	TCGA-33-AASB	TCGA-LUSC	Bronchus and lung	Male	1		chr9:g.132198139G>T	Missense	K129N	0.83	0.325	Tolerable	0.738	Damaging	MODHPRVEP: MODERATE, SIFT: deleterious - score 0, PolyPhen: probably_damaging - score 1
EA	TCGA-64-1677	TCGA-LUAD	Bronchus and lung	Female	2		chr9:g.132198143G>A	Missense	V131M	0.43	0.145	Tolerable	0.348	Tolerable	MODHPOVEP: MODERATE, SIFT: deleterious - score 0, PolyPhen: possibly_damaging - score 0.66
EA	TCGA-WE-A8K1	TCGA-SKCM	Skin	Male	1		chr9:g.132198164G>A	Missense	V138M	0.52	0.399	Tolerable	0.153	Tolerable	MODHPOVEP: MODERATE, SIFT: deleterious - score 0, PolyPhen: possibly_damaging - score 0.903
EA	TCGA-BR-6852	TCGA-STAD	Stomach	Female	1		chr9:g.132198182G>A	Missense	G144S	0.7	0.724	Damaging	0.362	Tolerable	MODHPRVEP: MODERATE, SIFT: deleterious - score 0.01, PolyPhen: probably_damaging - score 0.998
EA	TCGA-D1-A176	TCGA-UCEC	Corpus uteri	Female	1		chr9:g.132198192C>T	Missense	T147M	0.83	0.56	Damaging	0.334	Tolerable	MODHPRVEP: MODERATE, SIFT: deleterious - score 0.01, PolyPhen: probably_damaging - score 0.994
EA	TCGA-IB-7651	TCGA-PAAD	Pancreas	Female	7		chr9:g.132198192C>T	Missense	T147M	0.83	0.56	Damaging	0.334	Tolerable	MODHPRVEP: MODERATE, SIFT: deleterious - score 0.01, PolyPhen: probably_damaging - score 0.994
EA	TCGA-BG-A222	TCGA-UCEC	Corpus uteri	Female	1		chr9:g.132198199G>T	Missense	M149I	0.87	0.952	Damaging	0.699	Damaging	MODHPRVEP: MODERATE, SIFT: deleterious - score 0, PolyPhen: probably_damaging - score 0.985
EA	TCGA-VQ-A8P2	TCGA-STAD	Stomach	Male	4		chr9:g.132198200G>A	Missense	V150I	0.22	0.067	Tolerable	0.141	Tolerable	MOTOBEVEP: MODERATE, SIFT: tolerated - score 0.45, PolyPhen: benign - score 0.016
EA	TCGA-68-A59J	TCGA-LUSC	Bronchus and lung	Female	1		chr9:g.132198215C>A	Missense	L155M	0.39	0.249	Tolerable	0.068	Tolerable	MOTOPOVEP: MODERATE, SIFT: tolerated - score 0.14, PolyPhen: possibly_damaging - score 0.52
EA	TCGA-IP-7968	TCGA-STAD	Stomach	Male	1		chr9:g.132198224G>A	Missense	G158R	0.96	0.902	Damaging	0.814	Damaging	MODHPRVEP: MODERATE, SIFT: deleterious - score 0, PolyPhen: probably_damaging - score 0.999
EA	TCGA-C5-A1MJ	TCGA-CESC	Cervix uteri	Female	1		chr9:g.132198228G>A	Missense	R159H	0.65	0.797	Damaging	0.387	Tolerable	MODHPRVEP: MODERATE, SIFT: deleterious - score 0.01, PolyPhen: probably_damaging - score 0.999
EA	TCGA-D5-6535	TCGA-COAD	Colon	Female	1		chr9:g.132198234G>A	Stop Gained	W161*						HI----VEP: HIGH
EA	TCGA-CR-6481	TCGA-HNSC	Tonsil	Male	1		chr9:g.132198257G>A	Missense	E169K	0.57	0.509	Damaging	0.141	Tolerable	MOTOBEVEP: MODERATE, SIFT: tolerated - score 0.2, PolyPhen: benign - score 0.402
AA	TCGA-B5-A3FC	TCGA-UCEC	Corpus uteri	Female	3		chr9:g.132198260G>T	Missense	D170Y	0.87	0.966	Damaging	0.826	Damaging	MODHPRVEP: MODERATE, SIFT: deleterious - score 0, PolyPhen: probably_damaging - score 1
AA	TCGA-NH-A5IV	TCGA-COAD	Colon	Female	2		chr9:g.132198269G>A	Missense	E173K	0.57	0.528	Damaging	0.35	Tolerable	MODHPOVEP: MODERATE, SIFT: deleterious - score 0, PolyPhen: possibly_damaging - score 0.698
AA	TCGA-A6-5661	TCGA-COAD	Colon	Female	1		chr9:g.132198275T>C	Missense	F175L	0.87	0.822	Damaging	0.918	Damaging	MODHPRVEP: MODERATE, SIFT: deleterious - score 0, PolyPhen: probably_damaging - score 0.993
AA	TCGA-EO-A22R	TCGA-UCEC	Corpus uteri	Female	3		chr9:g.132198299C>T	Missense	R183C	0.7	0.84	Damaging	0.514	Damaging	MODHPRVEP: MODERATE, SIFT: deleterious - score 0, PolyPhen: probably_damaging - score 0.912
EA	TCGA-VF-A8AE	TCGA-TGCT	Testis	Male	1		chr9:g.132198300G>A	Missense	R183H	0.61	0.56	Damaging	0.287	Tolerable	MOTOPOVEP: MODERATE, SIFT: tolerated - score 0.11, PolyPhen: possibly_damaging - score 0.758
EA	TCGA-BR-8487	TCGA-STAD	Stomach	Female	1		chr9:g.132198308T>C	Missense	S186P	0.3	0.126	Tolerable	0.264	Tolerable	MOTOPOVEP: MODERATE, SIFT: tolerated - score 0.12, PolyPhen: possibly_damaging - score 0.551
NA	TCGA-A5-A1OF	TCGA-UCEC	Corpus uteri	Female	1		chr9:g.132198315C>T	Missense	S188F	0.61	0.28	Tolerable	0.356	Tolerable	MOTOPOVEP: MODERATE, SIFT: tolerated - score 0.09, PolyPhen: possibly_damaging - score 0.581
NA	TCGA-VQ-A924	TCGA-STAD	Stomach	Male	1		chr9:g.132198326C>T	Missense	R192C	0.87	0.943	Damaging	0.71	Damaging	MODHPRVEP: MODERATE, SIFT: deleterious - score 0, PolyPhen: probably_damaging - score 0.993
EA	TCGA-43-2581	TCGA-LUSC	Bronchus and lung	Female	1		chr9:g.132198338A>T	Missense	T196S	0.83	0.801	Damaging	0.758	Damaging	MODHPRVEP: MODERATE, SIFT: deleterious - score 0, PolyPhen: probably_damaging - score 0.947
EA	TCGA-22-5478	TCGA-LUSC	Bronchus and lung	Male	1		chr9:g.132198357delG	Frameshift	A203Qfs*166						HI----VEP: HIGH
EA	TCGA-94-A5I6	TCGA-LUSC	Bronchus and lung	Male	1		chr9:g.132198386C>T	Missense	R212C	0.83	0.743	Damaging	0.589	Damaging	MODHPRVEP: MODERATE, SIFT: deleterious - score 0, PolyPhen: probably_damaging - score 0.965
EA	TCGA-AP-A1E1	TCGA-UCEC	Corpus uteri	Female	1		chr9:g.132198399G>A	Missense	R216Q	0.61	0.422	Tolerable	0.319	Tolerable	MODHPOVEP: MODERATE, SIFT: deleterious - score 0.01, PolyPhen: possibly_damaging - score 0.517
EA	TCGA-22-5472	TCGA-LUSC	Bronchus and lung	Male	1		chr9:g.132198404C>A	Missense	R218S	0.87	0.946	Damaging	0.552	Damaging	MODHPRVEP: MODERATE, SIFT: deleterious - score 0, PolyPhen: probably_damaging - score 1
EA	TCGA-A8-A08X	TCGA-BRCA	Breast	Female	1		chr9:g.132198405G>A	Missense	R218H	0.87	0.874	Damaging	0.594	Damaging	MODHPRVEP: MODERATE, SIFT: deleterious - score 0.05, PolyPhen: probably_damaging - score 1
AA	TCGA-B5-A3FC	TCGA-UCEC	Corpus uteri	Female	3		chr9:g.132198410G>A	Missense	A220T	0.7	0.518	Damaging	0.256	Tolerable	MODHPRVEP: MODERATE, SIFT: deleterious - score 0, PolyPhen: probably_damaging - score 0.962
EA	TCGA-AB-2833	TCGA-LAML	Hematopoietic and reticuloendothelial systems	Male	1		chr9:g.132198423_132198424insC	Frameshift	D226Rfs*141						HI----VEP: HIGH
EA	TCGA-06-5416	TCGA-GBM	Brain	Female	3		chr9:g.132198428G>A	Missense	D226N	0.48	0.081	Tolerable	0.144	Tolerable	MOTOBEVEP: MODERATE, SIFT: tolerated - score 0.25, PolyPhen: benign - score 0.169
EA	TCGA-D5-6928	TCGA-COAD	Colon	Male	2		chr9:g.132198428G>A	Missense	D226N	0.48	0.081	Tolerable	0.144	Tolerable	MOTOBEVEP: MODERATE, SIFT: tolerated - score 0.25, PolyPhen: benign - score 0.169
EA	TCGA-CM-4743	TCGA-COAD	Colon	Male	1		chr9:g.132198434C>T	Missense	R228C	0.7	0.663	Damaging	0.447	Damaging	MOTOPOVEP: MODERATE, SIFT: tolerated - score 0.06, PolyPhen: possibly_damaging - score 0.83
EA	TCGA-AA-3966	TCGA-COAD	Colon	Female	1		chr9:g.132198438A>C	Missense	N229T	0.61	0.451	Tolerable	0.582	Damaging	MODHPOVEP: MODERATE, SIFT: deleterious - score 0, PolyPhen: possibly_damaging - score 0.588
EA	TCGA-DU-6392	TCGA-LGG	Brain	Female	1		chr9:g.132198458C>T	Missense	R236W	0.65	0.957	Damaging	0.44	Damaging	MODHPRVEP: MODERATE, SIFT: deleterious - score 0, PolyPhen: probably_damaging - score 0.996
EA	TCGA-06-0190	TCGA-GBM	Brain	Male	1		chr9:g.132198509C>T	Missense	R253C	0.91	0.988	Damaging	0.921	Damaging	MODHPRVEP: MODERATE, SIFT: deleterious - score 0, PolyPhen: probably_damaging - score 0.997
NA	TCGA-VS-A9UU	TCGA-CESC	Cervix uteri	Female	1		chr9:g.132198510G>A	Missense	R253H	0.96	0.974	Damaging	0.906	Damaging	MODHPRVEP: MODERATE, SIFT: deleterious - score 0, PolyPhen: probably_damaging - score 0.992
EA	TCGA-AG-3898	TCGA-READ	Rectum	Male	1		chr9:g.132198531C>T	Missense	A260V	0.87	0.884	Damaging	0.689	Damaging	MODHPOVEP: MODERATE, SIFT: deleterious - score 0, PolyPhen: possibly_damaging - score 0.876
EA	TCGA-CK-4951	TCGA-COAD	Colon	Female	2		chr9:g.132198551C>A	Missense	Q267K	0.61	0.755	Damaging	0.45	Damaging	MOTOBEVEP: MODERATE, SIFT: tolerated - score 0.4, PolyPhen: benign - score 0.035
EA	TCGA-58-A46K	TCGA-LUSC	Bronchus and lung	Male	1		chr9:g.132198554C>T	Missense	R268W	0.78	0.691	Damaging	0.58	Damaging	MODHPRVEP: MODERATE, SIFT: deleterious - score 0, PolyPhen: probably_damaging - score 0.987
EA	TCGA-85-8353	TCGA-LUSC	Bronchus and lung	Male	1		chr9:g.132198555G>A	Missense	R268Q	0.57	0.47	Tolerable	0.328	Tolerable	MODHPOVEP: MODERATE, SIFT: deleterious - score 0.02, PolyPhen: possibly_damaging - score 0.616
EA	TCGA-2W-A8YY	TCGA-CESC	Cervix uteri	Female	1		chr9:g.132198559G>T	Missense	E269D	0.22	0.136	Tolerable	0.111	Tolerable	MOTOBEVEP: MODERATE, SIFT: tolerated - score 0.55, PolyPhen: benign - score 0.004
EA	TCGA-FS-A1ZZ	TCGA-SKCM	Skin	Female	1		chr9:g.132198596G>A	Missense	E282K	0.48	0.666	Damaging	0.356	Tolerable	MOTOBEVEP: MODERATE, SIFT: tolerated - score 0.82, PolyPhen: benign - score 0.139
EA	TCGA-B5-A3FA	TCGA-UCEC	Corpus uteri	Female	1	2（2%） linker（285-286）	chr9:g.132198605G>A	Missense	G285S	0.74	0.458	Tolerable	0.603	Damaging	MODHPOVEP: MODERATE, SIFT: deleterious - score 0, PolyPhen: possibly_damaging - score 0.576
AA	TCGA-L9-A7SV	TCGA-LUAD	Bronchus and lung	Male	1		chr9:g.132226849G>T	Missense	R286S	0.57	0.891	Damaging	0.369	Tolerable	MODHBEVEP: MODERATE, SIFT: deleterious - score 0.03, PolyPhen: benign - score 0.059
EA	TCGA-D8-A1XQ	TCGA-BRCA	Breast	Female	1	18（18.4%） V-1 domain（287-328）	chr9:g.132226868G>A	Missense	A293T	0.78	0.836	Damaging	0.551	Damaging	MODHBEVEP: MODERATE, SIFT: deleterious - score 0.01, PolyPhen: benign - score 0.403
EA	TCGA-AD-6965	TCGA-COAD	Colon	Male	1		chr9:g.132226873C>A	Missense	N294K	0.48	0.128	Tolerable	0.137	Tolerable	MOTOBEVEP: MODERATE, SIFT: tolerated - score 0.08, PolyPhen: benign - score 0.031
EA	TCGA-AX-A2HD	TCGA-UCEC	Corpus uteri	Female	1		chr9:g.132226886C>T	Missense	R299C	0.39	0.313	Tolerable	0.181	Tolerable	MODHPOVEP: MODERATE, SIFT: deleterious - score 0.04, PolyPhen: possibly_damaging - score 0.576
EA	TCGA-ZB-A966	TCGA-THYM	Thymus	Female	1		chr9:g.132226886C>T	Missense	R299C	0.39	0.313	Tolerable	0.181	Tolerable	MODHPOVEP: MODERATE, SIFT: deleterious - score 0.04, PolyPhen: possibly_damaging - score 0.576
AA	TCGA-EY-A1GP	TCGA-UCEC	Corpus uteri	Female	1		chr9:g.132226889G>A	Missense	E300K	0.43	0.434	Tolerable	0.288	Tolerable	MOTOBEVEP: MODERATE, SIFT: tolerated - score 0.65, PolyPhen: benign - score 0.019
EA	TCGA-CG-5723	TCGA-STAD	Stomach	Male	1		chr9:g.132226889G>A	Missense	E300K	0.43	0.434	Tolerable	0.288	Tolerable	MOTOBEVEP: MODERATE, SIFT: tolerated - score 0.65, PolyPhen: benign - score 0.019
EA	TCGA-CN-A63Y	TCGA-HNSC	Tonsil	Male	1		chr9:g.132226907G>A	Missense	E306K	0.61	0.472	Tolerable	0.237	Tolerable	MODHPOVEP: MODERATE, SIFT: deleterious - score 0.01, PolyPhen: possibly_damaging - score 0.642
EA	TCGA-05-4382	TCGA-LUAD	Bronchus and lung	Male	1		chr9:g.132226907G>C	Missense	E306Q	0.48	0.149	Tolerable	0.121	Tolerable	MOTOBEVEP: MODERATE, SIFT: tolerated - score 0.12, PolyPhen: benign - score 0.161
EA	TCGA-M7-A725	TCGA-PRAD	Prostate gland	Male	1		chr9:g.132226911G>T	Missense	C307F	1	0.988	Damaging	0.964	Damaging	MODHPRVEP: MODERATE, SIFT: deleterious - score 0, PolyPhen: probably_damaging - score 0.956
EA	TCGA-D1-A167	TCGA-UCEC	Corpus uteri	Female	1		chr9:g.132226913G>A	Missense	E308K	0.65	0.88	Damaging	0.407	Damaging	MOTOPOVEP: MODERATE, SIFT: tolerated - score 0.13, PolyPhen: possibly_damaging - score 0.74
EAA	TCGA-AX-A2HJ	TCGA-UCEC	Corpus uteri	Female	1		chr9:g.132226917A>G	Missense	H309R	0.78	0.836	Damaging	0.625	Damaging	MODHPRVEP: MODERATE, SIFT: deleterious - score 0.02, PolyPhen: probably_damaging - score 0.997
EA	TCGA-EY-A215	TCGA-UCEC	Corpus uteri	Female	1		chr9:g.132226928G>A	Missense	G313S	1	0.958	Damaging	0.934	Damaging	MODHPRVEP: MODERATE, SIFT: deleterious - score 0.01, PolyPhen: probably_damaging - score 0.981
AA	TCGA-WS-AB45	TCGA-COAD	Colon	Female	1		chr9:g.132226928G>A	Missense	G313S	1	0.958	Damaging	0.934	Damaging	MODHPRVEP: MODERATE, SIFT: deleterious - score 0.01, PolyPhen: probably_damaging - score 0.981
EA	TCGA-06-5416	TCGA-GBM	Brain	Female	3		chr9:g.132226934G>A	Missense	D315N	0.61	0.1	Tolerable	0.306	Tolerable	MODHPOVEP: MODERATE, SIFT: deleterious - score 0, PolyPhen: possibly_damaging - score 0.479
AA	TCGA-B5-A3FC	TCGA-UCEC	Corpus uteri	Female	3		chr9:g.132226947G>A	Missense	C319Y	0.96	0.983	Damaging	0.97	Damaging	MODHPRVEP: MODERATE, SIFT: deleterious - score 0, PolyPhen: probably_damaging - score 0.953
EA	TCGA-HZ-A9TJ	TCGA-PAAD	Pancreas	Male	1		chr9:g.132226962G>A	Missense	R324H	0.43	0.355	Tolerable	0.236	Tolerable	MOTOBEVEP: MODERATE, SIFT: tolerated - score 0.21, PolyPhen: benign - score 0.02
EA	TCGA-56-7221	TCGA-LUSC	Bronchus and lung	Male	1		chr9:g.132226962G>T	Missense	R324L	0.39	0.473	Tolerable	0.233	Tolerable	MOTOBEVEP: MODERATE, SIFT: tolerated - score 0.11, PolyPhen: benign - score 0.004
EA	TCGA-44-7670	TCGA-LUAD	Bronchus and lung	Female	1		chr9:g.132226968G>T	Missense	R326L	0.48	0.485	Tolerable	0.202	Tolerable	MODHBEVEP: MODERATE, SIFT: deleterious - score 0.02, PolyPhen: benign - score 0.006
EA	TCGA-CM-6680	TCGA-COAD	Colon	Female	1	7(7.1%) linker (329-352)	chr9:g.132226976C>T	Missense	R329W	0.52	0.615	Damaging	0.322	Tolerable	MODHPOVEP: MODERATE, SIFT: deleterious - score 0, PolyPhen: possibly_damaging - score 0.854
EA	TCGA-E5-A4TZ	TCGA-BLCA	Bladder	Male	1		chr9:g.132226977G>A	Missense	R329Q	0.43	0.292	Tolerable	0.124	Tolerable	MOTOBEVEP: MODERATE, SIFT: tolerated - score 0.08, PolyPhen: benign - score 0.007
EA	TCGA-CG-5728	TCGA-STAD	Stomach	Female	1		chr9:g.132226983G>A	Missense	G331D	0.87	0.954	Damaging	0.688	Damaging	MODHPRVEP: MODERATE, SIFT: deleterious - score 0, PolyPhen: probably_damaging - score 0.996
EA	TCGA-CK-4951	TCGA-COAD	Colon	Female	2		chr9:g.132226994C>T	Missense	P335S	0.78	0.728	Damaging	0.437	Damaging	MODHPRVEP: MODERATE, SIFT: deleterious - score 0.01, PolyPhen: probably_damaging - score 0.982
AA	TCGA-99-8025	TCGA-LUAD	Bronchus and lung	Female	1		chr9:g.132227018G>A	Missense	A343T	0.22	0.099	Tolerable	0.086	Tolerable	MOTOBEVEP: MODERATE, SIFT: tolerated - score 0.75, PolyPhen: benign - score 0.012
AA	TCGA-49-AAR2	TCGA-LUAD	Bronchus and lung	Male	1		chr9:g.132230575C>A	Missense	A345D	0.36	0.648	Damaging	0.131	Tolerable	MOTOBEVEP: MODERATE, SIFT: tolerated - score 0.35, PolyPhen: benign - score 0.013
EA	TCGA-IB-7651	TCGA-PAAD	Pancreas	Female	7		chr9:g.132230593G>A	Missense	G351D	0.5	0.719	Damaging	0.124	Tolerable	MOTOBEVEP: MODERATE, SIFT: tolerated - score 0.1, PolyPhen: benign - score 0.212
AA	TCGA-EO-A22R	TCGA-UCEC	Corpus uteri	Female	3	3（3.1%） V-2 domain（353-401）	chr9:g.132239113G>C	Missense	C355S	0.96	0.957	Damaging	0.972	Damaging	MODHPRVEP: MODERATE, SIFT: deleterious - score 0.03, PolyPhen: probably_damaging - score 0.989
EA	TCGA-AZ-6601	TCGA-COAD	Colon	Male	1		chr9:g.132239188C>T	Missense	T380M	0.91	0.883	Damaging	0.693	Damaging	MODHPRVEP: MODERATE, SIFT: deleterious - score 0, PolyPhen: probably_damaging - score 0.993
EA	TCGA-2J-AAB6	TCGA-PAAD	Pancreas	Male	1		chr9:g.132239190C>T	Stop Gained	R381*						HI----VEP: HIGH
EA	TCGA-55-5899	TCGA-LUAD	Bronchus and lung	Male	1	2（2%） linker（402-408）	chr9:g.132239258G>T	Missense	E403D	0.57	0.616	Damaging	0.388	Tolerable	MOTOBEVEP: MODERATE, SIFT: tolerated - score 0.22, PolyPhen: benign - score 0.075
EA	TCGA-XF-AAN0	TCGA-BLCA	Bladder	Male	1		chr9:g.132240909G>A	Splice Acceptor	X408_splice						HI----VEP: HIGH
EA	TCGA-DX-AB30	TCGA-SARC	Connective, subcutaneous and other soft tissues	Female	1	3（3.1%） V-3 domain（409-456）	chr9:g.132240927A>G	Missense	I414V	0.35	0.157	Tolerable	0.134	Tolerable	MOTOBEVEP: MODERATE, SIFT: tolerated - score 0.63, PolyPhen: benign - score 0.079
EA	TCGA-E5-A4U1	TCGA-BLCA	Bladder	Male	1		chr9:g.132240942G>A	Missense	D419N	0.48	0.066	Tolerable	0.269	Tolerable	MOTOPRVEP: MODERATE, SIFT: tolerated - score 0.16, PolyPhen: probably_damaging - score 0.983
EAA	TCGA-HU-A4GQ	TCGA-STAD	Stomach	Male	3		chr9:g.132240991G>T	Missense	G435V	0.96	0.96	Damaging	0.903	Damaging	MODHPRVEP: MODERATE, SIFT: deleterious - score 0.01, PolyPhen: probably_damaging - score 0.987
EAA	TCGA-CC-A5UE	TCGA-LIHC	Liver and intrahepatic bile ducts	Male	1	2 (2%) linker (457-530)	chr9:g.132241889C>A	Missense	D457E	0.52	0.363	Tolerable	0.543	Damaging	MODHPRVEP: MODERATE, SIFT: deleterious - score 0.01, PolyPhen: probably_damaging - score 0.998
EA	TCGA-IB-7651	TCGA-PAAD	Pancreas	Female	7		chr9:g.132241948G>A	Missense	C477Y	0.87	0.956	Damaging	0.972	Damaging	MODHPRVEP: MODERATE, SIFT: deleterious - score 0, PolyPhen: probably_damaging - score 1

## Sheet: Total 
Cancer	NTN1	NTN3	NTN4	NTN5	NTNG1	NTNG2	Total
ACC		1（1.09%）	1（1.09%）		2（2.17%）		92
BLCA	5（1.09%）		4（0.97%）	1（0.24%）	6（1.46%）	4（0.97%）	412
BRCA		1（0.10%）	3（0.30%）		2（0.20%）	2（0.20%）	986
CESC	4（1.38%）	1（0.35%）	5（1.73%）		2（0.69%）	5（1.73%）	289
CHOL							51
COAD	8（2.01%）	4（1.00%）	12（3.01%）	6（1.50%）	14（3.51%）	14（3.51%）	399
DLBC							37
ESCA		1（0.54%）	2（1.09%）		1（0.54%）	1（0.54%）	184
GBM	4（1.02%）		10（2.54%）		1（0.25%）	3（0.76%）	393
HNSC	5（0.98%）	1（0.20%）	2（0.39%）	2（0.39%）	3（0.59%）	2（0.39%）	508
KICH							66
KIRC							336
KIRP	1（0.36%）				1（0.36%）		281
LAML			1（0.70%）			1（0.70%）	143
LGG	2（0.39%）	2（0.39%）	2（0.39%）			1（0.20%）	508
LIHC	2（0.55%）		2（0.55%）		1（0.27%）	1（0.27%）	364
LUAD	1（0.18%）	1（0.18%）	6（1.06%）	1（0.18%）	25（4.23%）	8（1.41%）	567
LUSC	3（0.61%）	2（0.41%）	4（0.81%）	5（1.02%）	15（3.05%）	12（2.44%）	492
MESO							82
OV			1（0.23%）		4（0.92%）		436
PAAD		1（0.56%）	1（0.56%）	1（0.56%）	2（1.12%）	3（2.81%）	178
PCPG						1（0.56%）	179
PRAD	1（0.20%）			1（0.20%）	2（0.40%）		495
READ	2（1.46%）	1（0.73%）	5（3.65%）		4（2.92%）	1（0.73%）	137
SARC	1（0.42%）		1（0.42%）			1（0.42%）	237
SKCM		1（0.21%）	24（5.14%）	6（1.28%）	20（4.28%）	3（0.64%）	467
STAD	10（2.29%）	5（1.14%）	4（0.92%）	1（0.23%）	23（5.26%）	11（2.52%）	437
TGCT						1（0.69%）	144
THCA						1（0.20%）	492
THYM						1（0.81%）	123
UCEC	13(2.45%)	10（1.89%）	19（3.58%）	9（1.70%）	25（4.72%）	14（2.64%）	530
UCS		1（1.75%）					57
UVM							80
The numbers here represent the number of people with netrin mutations.
