# Supplementary material for: The pan-cancer landscape of netrin family reveals potential oncogenic biomarkers
Source: Sci Rep. 2020 Mar 23;10:5224. doi: 10.1038/s41598-020-62117-5 (PMC7090012; doi:10.1038/s41598-020-62117-5)
Supplement: Supplementary file 2 — Dataset 2. [file 41598_2020_62117_MOESM2_ESM.xlsx]

## Sheet: Sheet1
The pan-cancer landscape of netrin family reveals potential oncogenic biomarkers
Wenjun Hao1,8, Meng Yu2,8, Jiaxing Lin3, Bitian Liu4, Haotian Xing3, Jieping Yang3, Dan Sun3, Feilong Chen3, Mingzhe Jiang3, Chaozhi Tang3, Xizhe Zhang5,6, Yongkang Zhao6,7 and Yuyan Zhu3,7*
1.Department of Urology, The First Affiliated Hospital of Dalian Medical University, Dalian 116011, China
2.Department of Reproductive Biology and Transgenic Animal, China Medical University, Shenyang 110001, China
3.Department of Urology, The First Affiliated Hospital of China Medical University, Shenyang 110001, China
4.Department of Urology, The Second Affiliated Hospital of China Medical University, Shenyang 110001, China
5.School of Computer Science and Engineering, Northeastern University, Shenyang, Liaoning, China
6.National Institute of Health and Medical Big Data, China Medical University, Shenyang, Liaoning, China
7.Joint Laboratory of Artificial Intelligence and Precision Medicine of China Medical University and Northeastern University, Northeastern University, Shenyang, Liaoning, China
8.These authors contributed equally
* Corresponding author: Yuyan Zhu, e-mail: yyzhu@cmu.edu.cn
Cancer	TCGA SampleId	FusionPair	E-value	Tier	Frame	5' Gene Junction	3' Gene Junction	CNV	Somatic Muts	WGS
SARC	TCGA-DX-A23V-01A	DRAM1__NTN4	0.037	tier1	Out-of-frame	Chr12:102271698/1	Chr12:96063922/-1	DRAM1 NTN4	DRAM1 NTN4	NA
ACC	TCGA-OR-A5JA-01A	NTN4__PAH	0.044	tier1	Out-of-frame	Chr12:96076483/-1	Chr12:103288696/-1	NTN4 PAH	NTN4 PAH	NA
UCEC	TCGA-A5-A7WK-01A	NTN1__RANGAP1	0.074	tier1	Out-of-frame	Chr17:8926708/1	Chr22:41664160/-1	NTN1 RANGAP1	NTN1 RANGAP1	NA
SARC	TCGA-DX-AB2G-01A	NTN4__LETMD1	0.078	tier1	In-frame	Chr12:96180717/-1	Chr12:51450133/1	NTN4 LETMD1	NTN4 LETMD1	NA
SARC	TCGA-X6-A8C6-01A	R3HDM2__NTN4	0.16	tier1	5UTR-CDS	Chr12:57789532/-1	Chr12:96077487/-1	R3HDM2 NTN4	R3HDM2 NTN4	NA
SARC	TCGA-DX-A3M1-01A	NTN4__TRHDE	0.21	tier1	Out-of-frame	Chr12:96104219/-1	Chr12:72680461/1	NTN4 TRHDE	NTN4 TRHDE	validated
BRCA	TCGA-AR-A1AV-01A	DNAJC22__NTN4	0.34	tier1	5UTR-CDS	Chr12:49741334/1	Chr12:96131922/-1	DNAJC22 NTN4	DNAJC22 NTN4	NA
SKCM	TCGA-D3-A5GS-06A	WARS2__NTNG1	0.47	tier1	Out-of-frame	Chr1:119618973/-1	Chr1:108023233/1	WARS2 NTNG1	WARS2 NTNG1	NA
SARC	TCGA-DX-A1L3-01A	NTN4__KIFAP3	0.53	tier1	In-frame	Chr12:96180717/-1	Chr1:169930376/-1	NTN4 KIFAP3	NTN4 KIFAP3	validated
LUAD	TCGA-05-4430-01A	HSPG2__NTNG1	2.4	tier1	Out-of-frame	Chr1:22222415/-1	Chr1:107866904/1	HSPG2 NTNG1	HSPG2 NTNG1	NA
LUAD	TCGA-69-7979-01A	MKL1__NTNG1	2.6	tier1	5UTR-CDS	Chr22:41032482/-1	Chr1:107937776/1	MKL1 NTNG1	MKL1 NTNG1	NA
BRCA	TCGA-EW-A2FW-01A	FAM69A__NTNG1	5.2	tier1	Out-of-frame	Chr1:93426933/-1	Chr1:108023233/1	FAM69A NTNG1	FAM69A NTNG1	NA
SARC	TCGA-DX-A3M1-01A	NTN4__NUP107	1.6	tier2	In-frame	Chr12:96131644/-1	Chr12:69135593/1	NTN4 NUP107	NTN4 NUP107	non-validated
ACC	TCGA-OR-A5JA-01A	FRS2__NTN4	0.25	tier3	5UTR-CDS	Chr12:69864310/1	Chr12:96063922/-1	FRS2 NTN4	FRS2 NTN4	NA
SKCM	TCGA-D9-A4Z5-01A	NTNG1__CALN1	0.46	tier3	Out-of-frame	Chr1:107691461/1	Chr7:71252887/-1	NTNG1 CALN1	NTNG1 CALN1	NA
LUAD	TCGA-05-4427-01A	NTN4__CCDC38	1.2	tier3	Out-of-frame	Chr12:96180717/-1	Chr12:96292243/-1	NTN4 CCDC38	NTN4 CCDC38	NA
LUSC	TCGA-21-5784-01A	NTN1__STX8	0.2	tier4	In-frame	Chr17:9086286/1	Chr17:9153962/-1	NTN1 STX8	NTN1 STX8	NA
