# Supplementary material for: The pan-cancer landscape of netrin family reveals potential oncogenic biomarkers
Source: Sci Rep. 2020 Mar 23;10:5224. doi: 10.1038/s41598-020-62117-5 (PMC7090012; doi:10.1038/s41598-020-62117-5)
Supplement: Supplementary file 3 — Dataset 3. [file 41598_2020_62117_MOESM3_ESM.xlsx]

## Sheet: Title Page
The pan-cancer landscape of netrin family reveals potential oncogenic biomarkers
Wenjun Hao1,8, Meng Yu2,8, Jiaxing Lin3, Bitian Liu4, Haotian Xing3, Jieping Yang3, Dan Sun3, Feilong Chen3, Mingzhe Jiang3, Chaozhi Tang3, Xizhe Zhang5,6, Yongkang Zhao6,7 and Yuyan Zhu3,7*
1.Department of Urology, The First Affiliated Hospital of Dalian Medical University, Dalian 116011, China
2.Department of Reproductive Biology and Transgenic Animal, China Medical University, Shenyang 110001, China
3.Department of Urology, The First Affiliated Hospital of China Medical University, Shenyang 110001, China
4.Department of Urology, The Second Affiliated Hospital of China Medical University, Shenyang 110001, China
5.School of Computer Science and Engineering, Northeastern University, Shenyang, Liaoning, China
6.National Institute of Health and Medical Big Data, China Medical University, Shenyang, Liaoning, China
7.Joint Laboratory of Artificial Intelligence and Precision Medicine of China Medical University and Northeastern University, Northeastern University, Shenyang, Liaoning, China
8.These authors contributed equally
* Corresponding author: Yuyan Zhu, e-mail: yyzhu@cmu.edu.cn

## Sheet: NTN1
	Median (Tumor)	Median (Normal)	Log2(Fold Change)	adjp
ACC	0.19	0.19
BLCA	0.62	4.89	-1.863	4.36e-12
BRCA	3.34	3.69
CESC	2.88	6.68
CHOL	0.44	1.08
COAD	0.69	8.03	-2.418	1.1e-92
DLBC	0.17	0.02
ESCA	5.53	12.99	-1.1	4.56e-16
GBM	19.71	1.53	3.033	2.94e-82
HNSC	5.21	7.77
KICH	20.22	1.21	3.263	1.18e-21
KIRC	0.36	1.49
KIRP	0.18	1.3
LAML	1.39	0.02	1.228	0.00112
LGG	22.61	1.53	3.222	2.68e-124
LIHC	1.99	2
LUAD	1.83	3.52
LUSC	5.5	3.66
OV	4.92	0.48	2.001	3.25e-32
PAAD	2.02	0.78
PCPG	0.21	0.2
PRAD	1.5	3.74
READ	0.76	8.63	-2.451	2.62e-40
SARC	5.41	3.59
SKCM	0.38	6.17	-2.376	5.36e-159
STAD	2.9	5.62
TGCT	0.66	4.15	-1.633	2.82e-07
THCA	0.27	1.67	-1.072	1.61e-99
THYM	8.28	0.02	3.186	2.78e-84
UCEC	4.83	7.9
UCS	3.29	7.42

## Sheet: NTN3
	Median (Tumor)	Median (Normal)	Log2(Fold Change)	adjp
ACC	0.02	0.03
BLCA	0.01	0.01
BRCA	0.04	0.06
CESC	0.06	0.04
CHOL	0.06	0.19
COAD	0.01	0.02
DLBC	0.02	0
ESCA	0.09	0.02
GBM	0.23	0.14
HNSC	0.02	0.02
KICH	0.09	0.04
KIRC	0.01	0.04
KIRP	0.01	0.05
LAML	0.19	0.02
LGG	0.38	0.14
LIHC	0.07	0.08
LUAD	0.04	0.03
LUSC	0.07	0.03
OV	0.18	0.02
PAAD	0.02	0.01
PCPG	0.11	0.01
PRAD	0.02	0.04
READ	0.01	0.02
SARC	0.12	0
SKCM	0.07	0.02
STAD	0.05	0.02
TGCT	0.09	0.39
THCA	0.02	0.06
THYM	0.12	0
UCEC	0.04	0.06
UCS	0.36	0.06

## Sheet: NTN4
	Median (Tumor)	Median (Normal)	Log2(Fold Change)	adjp
ACC	11.64	15.04
BLCA	12.85	19.08
BRCA	33.67	55.74
CESC	6.24	15.04
CHOL	13.41	6.34
COAD	5.5	8.78
DLBC	0.37	0.05
ESCA	7.24	7.23
GBM	2.43	7.63	-1.331	5.47e-21
HNSC	5	8.16
KICH	15.19	57.31	-1.849	1.41e-06
KIRC	39.24	92.61	-1.218	1.99e-11
KIRP	25.64	66.99	-1.352	3e-05
LAML	0.09	0.03
LGG	10.01	7.63
LIHC	3.42	5.93
LUAD	16.48	31.48
LUSC	8.63	31.31	-1.747	1.44e-69
OV	8.29	28.43	-1.663	4.2e-20
PAAD	19.92	12.92
PCPG	4.9	15.21
PRAD	20.22	33.91
READ	5.41	8.63
SARC	9.59	36.38
SKCM	1.5	7.58	-1.779	8.75e-64
STAD	9	18.82
TGCT	3.36	8.47	-1.119	3.75e-16
THCA	4.78	13.66	-1.343	1.54e-65
THYM	6.2	0.05	2.777	3.89e-80
UCEC	6.15	11.96
UCS	3.61	10.81	-1.357	0.000206

## Sheet: NTN5
	Median (Tumor)	Median (Normal)	Log2(Fold Change)	adjp
ACC	0.38	0.46
BLCA	0.23	0.31
BRCA	0.25	1.08
CESC	0.29	1.45
CHOL	0.29	0.11
COAD	0.1	0.52
DLBC	0.12	0.1
ESCA	0.28	0.47
GBM	0.41	1.22
HNSC	0.11	0.07
KICH	0.27	0.28
KIRC	0.19	0.08
KIRP	0.35	0.26
LAML	0.54	0.1
LGG	0.55	1.22
LIHC	0.11	0.15
LUAD	0.19	0.55
LUSC	0.24	0.57
OV	0.4	3.56	-1.702	1.72e-64
PAAD	0.25	0.18
PCPG	0.43	0.34
PRAD	0.59	1.64
READ	0.08	0.57
SARC	0.21	0.14
SKCM	0.19	1.44	-1.033	1.92e-117
STAD	0.16	0.22
TGCT	0.12	1.2
THCA	0.43	1.69
THYM	1.21	0.1	1.006	2.84e-82
UCEC	0.41	1.97	-1.075	3.93e-21
UCS	0.57	2.25	-1.05	0.000193

## Sheet: NTNG1
	Median (Tumor)	Median (Normal)	Log2(Fold Change)	adjp
ACC	0.01	0.08
BLCA	0.1	2.01	-1.45	2.55e-16
BRCA	0.13	0.18
CESC	0.06	2.13	-1.562	1.56e-09
CHOL	0.01	0
COAD	0.03	0.7
DLBC	0.45	0.01
ESCA	0.06	0.09
GBM	3.76	6.19
HNSC	0.05	0.07
KICH	0.22	3.55	-1.899	8.73e-06
KIRC	0.04	4.16	-2.312	1.14e-85
KIRP	0.23	4.62	-2.193	9.5e-25
LAML	0.07	0
LGG	1.66	6.19	-1.435	1.22e-20
LIHC	0	0.01
LUAD	0.24	3.06	-1.711	2.9e-93
LUSC	0.11	2.98	-1.844	2.37e-126
OV	0.33	0.19
PAAD	0.29	0.06
PCPG	6.66	0.04
PRAD	1.93	2.92
READ	0.04	0.78
SARC	1.41	9.18
SKCM	0.14	0.52
STAD	0.07	0.13
TGCT	2.8	1.11
THCA	0.03	0.16
THYM	0.15	0.01
UCEC	0.12	0.29
UCS	1.52	0.31

## Sheet: NTNG2
	Median (Tumor)	Median (Normal)	Log2(Fold Change)	adjp
ACC	0.61	2.09
BLCA	0.28	0.8
BRCA	0.33	0.27
CESC	0.22	0.72
CHOL	0.23	0.03
COAD	0.36	0.44
DLBC	0.79	9.58	-2.563	3.77e-33
ESCA	0.67	0.31
GBM	2.5	11.43	-1.828	8.69e-53
HNSC	0.28	0.11
KICH	0.15	0.3
KIRC	0.49	0.23
KIRP	0.21	0.27
LAML	10.64	0.08	3.43	1.18e-07
LGG	11.3	11.43
LIHC	0.06	0.1
LUAD	0.43	2.45	-1.271	8.44e-40
LUSC	0.43	2.49	-1.287	8.76e-86
OV	1.31	0.27
PAAD	0.79	0.53
PCPG	4.44	1.66
PRAD	1.46	3.88
READ	0.31	0.48
SARC	0.76	0.87
SKCM	0.25	0.44
STAD	0.93	0.39
TGCT	0.54	3.3	-1.481	3.44e-48
THCA	0.29	0.48
THYM	0.6	9.57	-2.719	6.76e-71
UCEC	0.27	0.63
UCS	0.33	0.73
