# Supplementary material for: The pan-cancer landscape of netrin family reveals potential oncogenic biomarkers
Source: Sci Rep. 2020 Mar 23;10:5224. doi: 10.1038/s41598-020-62117-5 (PMC7090012; doi:10.1038/s41598-020-62117-5)
Supplement: Supplementary file 4 — Dataset 4. [file 41598_2020_62117_MOESM4_ESM.xlsx]

## Sheet: Sheet1
The pan-cancer landscape of netrin family reveals potential oncogenic biomarkers
Wenjun Hao1,8, Meng Yu2,8, Jiaxing Lin3, Bitian Liu4, Haotian Xing3, Jieping Yang3, Dan Sun3, Feilong Chen3, Mingzhe Jiang3, Chaozhi Tang3, Xizhe Zhang5,6, Yongkang Zhao6,7 and Yuyan Zhu3,7*
1.Department of Urology, The First Affiliated Hospital of Dalian Medical University, Dalian 116011, China
2.Department of Reproductive Biology and Transgenic Animal, China Medical University, Shenyang 110001, China
3.Department of Urology, The First Affiliated Hospital of China Medical University, Shenyang 110001, China
4.Department of Urology, The Second Affiliated Hospital of China Medical University, Shenyang 110001, China
5.School of Computer Science and Engineering, Northeastern University, Shenyang, Liaoning, China
6.National Institute of Health and Medical Big Data, China Medical University, Shenyang, Liaoning, China
7.Joint Laboratory of Artificial Intelligence and Precision Medicine of China Medical University and Northeastern University, Northeastern University, Shenyang, Liaoning, China
8.These authors contributed equally
* Corresponding author: Yuyan Zhu, e-mail: yyzhu@cmu.edu.cn
	NTN1	NTN3	NTN4	NTN5	NTNG1	NTNG2
ACC	0.89	0.0085	0.0089	0.027	0.71	0.0012
BLCA	0.0048	0.33	9.6e-05	0.0024	0.0005	0.094
BRCA	0.8	0.0078	0.48	0.0017	0.94	0.0287
CESC	0.0258	0.24	0.9	0.96	0.5	0.0317
CHOL	0.5	0.58	0.78	0.83	0.66	0.31
COAD	1	0.069	0.61	0.005	0.68	0.25
DLBC	0.8	0.51	0.41	0.86	0.45	0.6
ESCA	0.66	0.75	0.85	0.26	0.0127	0.97
GBM	0.33	0.14	0.62	0.73	0.015	0.92
HNSC	0.0093	0.0435	0.52	0.0368	0.15	0.18
KICH	0.35	0.1	0.93	0.46	0.59	0.21
KIRC	0.022	0.0294	1.9e-11	5.7e-05	3.7e-06	1.1e-05
KIRP	0.0122	0.0025	0.0095	0.52	0.0371	0.0027
LAML	0.73	0.16	0.25	0.23	0.066	0.42
LGG	0.17	0.41	7.1e-05	0.75	2.5e-06	1.8e-07
LIHC	0.28	0.0018	0.76	0.8	1.6e-06	0.0432
LUAD	0.81	0.19	0.52	0.52	0.3	0.0428
LUSC	0.12	0.79	0.0048	0.28	0.12	0.0383
MESO	0.18	1	0.99	0.5	0.048	0.4
OV	0.0133	0.92	0.24	0.0058	0.35	0.78
PAAD	0.44	0.0291	0.0017	0.0009	0.33	0.0281
PCPG	0.45	0.16	0.46	0.57	0.0071	0.68
PRAD	0.47	0.93	0.89	0.63	0.66	0.033
READ	0.038	0.97	0.23	0.77	0.69	0.86
SARC	0.21	0.084	0.5	0.18	0.76	0.0164
SKCM	0.2	0.4	0.0034	0.19	0.93	0.0038
STAD	0.0026	0.29	0.0367	0.0011	0.0006	0.49
TGCT	0.51	0.3	0.76	0.43	0.84	0.17
THCA	0.0052	0.0176	0.99	0.35	0.89	0.0396
THYM	0.0283	0.62	0.39	0.18	0.27	0.62
UCEC	0.0494	0.0352	0.43	0.88	0.0003	0.91
UCS	0.77	0.32	0.39	0.23	0.95	0.73
UVM	0.015	0.8	0.63	0.66	0.042	0.008
The above figures represent the P value of the survival analysis.
red-the high expression of gene has worse survival in cancer
blue-the low expression of gene has worse survival in cancer
