# Supplementary material for: The pan-cancer landscape of netrin family reveals potential oncogenic biomarkers
Source: Sci Rep. 2020 Mar 23;10:5224. doi: 10.1038/s41598-020-62117-5 (PMC7090012; doi:10.1038/s41598-020-62117-5)
Supplement: Supplementary file 5 — Dataset 5. [file 41598_2020_62117_MOESM5_ESM.xlsx]

## Sheet: Sheet1
The pan-cancer landscape of netrin family reveals potential oncogenic biomarkers
Wenjun Hao1,8, Meng Yu2,8, Jiaxing Lin3, Bitian Liu4, Haotian Xing3, Jieping Yang3, Dan Sun3, Feilong Chen3, Mingzhe Jiang3, Chaozhi Tang3, Xizhe Zhang5,6, Yongkang Zhao6,7 and Yuyan Zhu3,7*
1.Department of Urology, The First Affiliated Hospital of Dalian Medical University, Dalian 116011, China
2.Department of Reproductive Biology and Transgenic Animal, China Medical University, Shenyang 110001, China
3.Department of Urology, The First Affiliated Hospital of China Medical University, Shenyang 110001, China
4.Department of Urology, The Second Affiliated Hospital of China Medical University, Shenyang 110001, China
5.School of Computer Science and Engineering, Northeastern University, Shenyang, Liaoning, China
6.National Institute of Health and Medical Big Data, China Medical University, Shenyang, Liaoning, China
7.Joint Laboratory of Artificial Intelligence and Precision Medicine of China Medical University and Northeastern University, Northeastern University, Shenyang, Liaoning, China
8.These authors contributed equally
* Corresponding author: Yuyan Zhu, e-mail: yyzhu@cmu.edu.cn
Type	Cancer	Gene	Target Gene/Attribute	Statistic	P-value	FDR (BH)
Expression	BLCA	NTN1	Tumor_purity (Spearman Correlation)	-0.3625	8.915e-14	9.807e-13
Expression	BLCA	NTN1	pathologic_stage (Kruskal-Wallis Test)	18.77	0.0003052	0.001679
Expression	BLCA	NTN1	race (Kruskal-Wallis Test)	14.84	0.0005978	0.002192
Expression	BLCA	NTN1	pathology_T_stage (Kruskal-Wallis Test)	14.6	0.005611	0.01543
Expression	BLCA	NTN1	overall_survival (Cox Regression Test)	0.09302	0.009977	0.02195
Expression	LGG	NTN1	histological_type (Kruskal-Wallis Test)	35.55	1.91e-08	1.337e-07
Expression	LGG	NTN1	Tumor_purity (Spearman Correlation)	-0.2239	7.023e-07	2.458e-06
Expression	LGG	NTN1	radiation_therapy (Wilcox Test)	0.02452	0.004281	0.009989
Expression	BRCA	NTN1	PAM50 (Kruskal-Wallis Test)	43.72	1.733e-09	2.946e-08
Expression	BRCA	NTN1	race (Kruskal-Wallis Test)	17.42	0.0001651	0.001403
Expression	BRCA	NTN1	HER2.Status (Wilcox Test)	-0.1813	0.00526	0.02981
Expression	CESC	NTN1	histological_type (Kruskal-Wallis Test)	17.75	0.003272	0.03599
Expression	COADREAD	NTN1	Tumor_purity (Spearman Correlation)	-0.383	3.111e-14	4.355e-13
Expression	COADREAD	NTN1	number_of_lymph_nodes (Spearman Correlation)	0.1767	0.001123	0.007861
Expression	COADREAD	NTN1	pathology_N_stage (Kruskal-Wallis Test)	9.773	0.007547	0.03522
Expression	LUSC	NTN1	years_to_birth (Spearman Correlation)	0.1979	1.573e-05	0.0001888
Expression	OV	NTN1	Tumor_purity (Spearman Correlation)	-0.1557	0.007492	0.04495
Expression	PARD	NTN1	Tumor_purity (Spearman Correlation)	-0.2917	3.959e-11	3.563e-10
Expression	SARC	NTN1	histological_type (Kruskal-Wallis Test)	33.83	0.0001976	0.001383
Expression	STAD	NTN1	histological_type (Kruskal-Wallis Test)	26.65	0.0001687	0.002024
Expression	STAD	NTN1	years_to_birth (Spearman Correlation)	-0.1843	0.0003721	0.002232
Expression	STAD	NTN1	race (Kruskal-Wallis Test)	9.297	0.009574	0.03829
Expression	TGCT	NTN1	radiation_therapy (Wilcox Test)	-0.6433	1.575e-06	1.418e-05
Expression	TGCT	NTN1	years_to_birth (Spearman Correlation)	-0.2482	0.004407	0.01373
Expression	TGCT	NTN1	pathologic_stage (Kruskal-Wallis Test)	13.03	0.004576	0.01373
Expression	THYM	NTN1	histological_type (Kruskal-Wallis Test)	42.64	4.362e-08	2.181e-07
Expression	THYM	NTN1	years_to_birth (Spearman Correlation)	0.2411	0.008542	0.02136
Expression	THCA	NTN1	Tumor_purity (Spearman Correlation)	-0.2855	1.203e-10	1.564e-09
Expression	UCEC	NTN1	MSI_phenotype (Wilcox Test)	0.1447	0.006394	0.03836
Methylation	LGG	NTN1	histological_type (Kruskal-Wallis Test)	42.95	4.723e-10	2.028e-09
Methylation	LGG	NTN1	Tumor_purity (Spearman Correlation)	0.2777	5.794e-10	2.028e-09
Methylation	LGG	NTN1	radiation_therapy (Wilcox Test)	-0.03364	1.47e-05	3.429e-05
Methylation	LGG	NTN1	years_to_birth (Spearman Correlation)	-0.1777	9.057e-05	0.0001585
Methylation	LGG	NTN1	overall_survival (Cox Regression Test)	-9.059	0.0004943	0.000692
Methylation	BRCA	NTN1	Tumor_purity (Spearman Correlation)	-0.4792	6.836e-45	1.162e-43
Methylation	BRCA	NTN1	PAM50 (Kruskal-Wallis Test)	34.52	1.541e-07	1.31e-06
Methylation	BRCA	NTN1	histological_type (Kruskal-Wallis Test)	36.33	2.383e-06	1.35e-05
Methylation	BRCA	NTN1	years_to_birth (Spearman Correlation)	-0.1146	0.001616	0.006869
Methylation	COADREAD	NTN1	Tumor_purity (Spearman Correlation)	0.1497	0.003536	0.0495
Methylation	ESCA	NTN1	years_to_birth (Spearman Correlation)	0.2859	0.0001047	0.001152
Methylation	ESCA	NTN1	race (Kruskal-Wallis Test)	13.14	0.001404	0.00772
Methylation	ESCA	NTN1	pathology_T_stage (Kruskal-Wallis Test)	14.03	0.002869	0.01052
Methylation	ESCA	NTN1	radiation_therapy (Wilcox Test)	-0.03702	0.009678	0.02662
Methylation	GBM	NTN1	Tumor_purity (Spearman Correlation)	-0.4136	1.217e-06	8.519e-06
Methylation	HNSC	NTN1	Tumor_purity (Spearman Correlation)	-0.1757	5.919e-05	0.0007103
Methylation	HNSC	NTN1	overall_survival (Cox Regression Test)	1.294	0.0008107	0.004864
Methylation	HNSC	NTN1	histological_type (Kruskal-Wallis Test)	13.06	0.001459	0.005835
Methylation	KIRP	NTN1	Tumor_purity (Spearman Correlation)	0.2537	3.147e-05	0.0003147
Methylation	KIRP	NTN1	pathology_N_stage (Kruskal-Wallis Test)	12.21	0.00223	0.01115
Methylation	KIRP	NTN1	pathology_T_stage (Kruskal-Wallis Test)	12.89	0.004889	0.0163
Methylation	LIHC	NTN1	Tumor_purity (Spearman Correlation)	-0.265	5.681e-07	6.818e-06
Methylation	LUSC	NTN1	Tumor_purity (Spearman Correlation)	-0.2515	1.883e-06	2.26e-05
Methylation	PCPG	NTN1	histological_type (Kruskal-Wallis Test)	10.24	0.005964	0.04175
Methylation	PRAD	NTN1	Tumor_purity (Spearman Correlation)	0.419	2.028e-22	1.825e-21
Methylation	SKCM	NTN1	Tumor_purity (Spearman Correlation)	0.4776	6.596e-07	5.936e-06
Methylation	THYM	NTN1	histological_type (Kruskal-Wallis Test)	51.02	8.565e-10	4.283e-09
Methylation	THYM	NTN1	years_to_birth (Spearman Correlation)	-0.294	0.001013	0.002534
Methylation	THCA	NTN1	Tumor_purity (Spearman Correlation)	0.4473	1.428e-25	1.857e-24
Methylation	THCA	NTN1	pathology_N_stage (Wilcox Test)	-0.02844	0.001698	0.01104
Methylation	THCA	NTN1	number_of_lymph_nodes (Spearman Correlation)	-0.1345	0.008158	0.03037
Methylation	THCA	NTN1	histological_type (Kruskal-Wallis Test)	11.49	0.009344	0.03037
Methylation	UCS	NTN1	Tumor_purity (Spearman Correlation)	0.4473	1.428e-25	1.857e-24
Methylation	UCS	NTN1	pathology_N_stage (Wilcox Test)	-0.02844	0.001698	0.01104
Methylation	UCS	NTN1	number_of_lymph_nodes (Spearman Correlation)	-0.1345	0.008158	0.03037
Methylation	UCS	NTN1	histological_type (Kruskal-Wallis Test)	11.49	0.009344	0.03037
Methylation	UCEC	NTN1	histological_type (Kruskal-Wallis Test)	73.71	9.849e-17	5.909e-16
Methylation	UCEC	NTN1	overall_survival (Cox Regression Test)	1.605	0.0003964	0.001189
Expression	ACC	NTN3	Tumor_purity (Spearman Correlation)	0.3349	0.002551	0.03062
Expression	LGG	NTN3	Tumor_purity (Spearman Correlation)	0.2195	1.174e-06	8.218e-06
Expression	LGG	NTN3	histological_type (Kruskal-Wallis Test)	19.94	4.669e-05	0.0001634
Expression	BRCA	NTN3	Tumor_purity (Spearman Correlation)	0.1115	0.0003092	0.005256
Expression	COADREAD	NTN3	overall_survival (Cox Regression Test)	0.7218	8.231e-05	0.001152
Expression	ESCA	NTN3	race (Kruskal-Wallis Test)	34.95	2.57e-08	2.827e-07
Expression	ESCA	NTN3	years_to_birth (Spearman Correlation)	-0.2518	0.0006969	0.003833
Expression	ESCA	NTN3	radiation_therapy (Wilcox Test)	0.323	0.01307	0.04792
Expression	ESCA	NTN3	pathologic_stage (Kruskal-Wallis Test)	9.702	0.02128	0.04982
Expression	ESCA	NTN3	pathology_T_stage (Kruskal-Wallis Test)	9.566	0.02264	0.04982
Expression	HNSC	NTN3	number_of_lymph_nodes (Spearman Correlation)	0.1471	0.003344	0.04013
Expression	OV	NTN3	Tumor_purity (Spearman Correlation)	0.2266	8.881e-05	0.0005329
Expression	OV	NTN3	years_to_birth (Spearman Correlation)	0.2118	0.0003091	0.0009272
Expression	PRAD	NTN3	Tumor_purity (Spearman Correlation)	-0.1259	0.005127	0.02784
Expression	PRAD	NTN3	pathology_T_stage (Kruskal-Wallis Test)	10.17	0.006187	0.02784
Expression	SARC	NTN3	histological_type (Kruskal-Wallis Test)	41.89	7.834e-06	5.483e-05
Expression	SARC	NTN3	years_to_birth (Spearman Correlation)	-0.1698	0.006679	0.02338
Expression	STAD	NTN3	years_to_birth (Spearman Correlation)	-0.2011	0.0001004	0.001204
Expression	STAD	NTN3	race (Kruskal-Wallis Test)	10.77	0.004583	0.0275
Expression	THCA	NTN3	histological_type (Kruskal-Wallis Test)	35.54	9.367e-08	1.218e-06
Expression	THCA	NTN3	Tumor_purity (Spearman Correlation)	0.2275	3.59e-07	2.334e-06
Expression	THCA	NTN3	pathology_N_stage (Wilcox Test)	-0.3082	4.747e-06	2.057e-05
Expression	THCA	NTN3	number_of_lymph_nodes (Spearman Correlation)	-0.2019	6.783e-05	0.0002204
Expression	THCA	NTN3	overall_survival (Cox Regression Test)	0.8117	0.0005417	0.00128
Expression	THCA	NTN3	pathologic_stage (Kruskal-Wallis Test)	17.38	0.000591	0.00128
Expression	THCA	NTN3	pathology_T_stage (Kruskal-Wallis Test)	14.43	0.002377	0.004414
Methylation	LGG	NTN3	years_to_birth (Spearman Correlation)	-0.2576	1.024e-08	7.166e-08
Methylation	LGG	NTN3	overall_survival (Cox Regression Test)	-4.867	3.305e-08	1.157e-07
Methylation	LGG	NTN3	radiation_therapy (Wilcox Test)	-0.07573	0.002529	0.005901
Methylation	LGG	NTN3	Tumor_purity (Spearman Correlation)	0.111	0.0149	0.02607
Methylation	BRCA	NTN3	PAM50 (Kruskal-Wallis Test)	19.58	0.0002071	0.003521
Methylation	CESC	NTN3	Tumor_purity (Spearman Correlation)	-0.2221	0.0002276	0.002503
Methylation	COADREAD	NTN3	histological_type (Kruskal-Wallis Test)	21.27	9.257e-05	0.001296
Methylation	ESCA	NTN3	years_to_birth (Spearman Correlation)	0.2859	0.0001047	0.001152
Methylation	ESCA	NTN3	race (Kruskal-Wallis Test)	13.14	0.001404	0.00772
Methylation	ESCA	NTN3	pathology_T_stage (Kruskal-Wallis Test)	14.03	0.002869	0.01052
Methylation	ESCA	NTN3	radiation_therapy (Wilcox Test)	-0.03702	0.009678	0.02662
Methylation	GBM	NTN3	Tumor_purity (Spearman Correlation)	-0.6207	5.496e-15	3.847e-14
Methylation	HNSC	NTN3	Tumor_purity (Spearman Correlation)	-0.2698	4.481e-10	5.377e-09
Methylation	HNSC	NTN3	histological_type (Kruskal-Wallis Test)	9.982	0.0068	0.0408
Methylation	KIRC	NTN3	pathology_M_stage (Wilcox Test)	0.04609	0.006416	0.04105
Methylation	KIRC	NTN3	race (Kruskal-Wallis Test)	9.605	0.00821	0.04105
Methylation	KIRP	NTN3	Tumor_purity (Spearman Correlation)	0.2569	2.48e-05	0.000248
Methylation	KIRP	NTN3	pathologic_stage (Kruskal-Wallis Test)	12.94	0.004769	0.02384
Methylation	KIRP	NTN3	pathology_T_stage (Kruskal-Wallis Test)	11.85	0.007929	0.02643
Methylation	KIRP	NTN3	overall_survival (Cox Regression Test)	-2.549	0.01783	0.04457
Methylation	LIHC	NTN3	Tumor_purity (Spearman Correlation)	-0.2859	6.251e-08	7.501e-07
Methylation	LIHC	NTN3	years_to_birth (Spearman Correlation)	-0.1429	0.007753	0.04652
Methylation	LUSC	NTN3	Tumor_purity (Spearman Correlation)	-0.3562	6.544e-12	7.853e-11
Methylation	PCPG	NTN3	histological_type (Kruskal-Wallis Test)	26.38	1.865e-06	1.305e-05
Methylation	PRAD	NTN3	pathology_T_stage (Kruskal-Wallis Test)	9.664	0.00797	0.0274
Methylation	PRAD	NTN3	residual_tumor (Kruskal-Wallis Test)	9.504	0.008633	0.0274
Methylation	PRAD	NTN3	Tumor_purity (Spearman Correlation)	0.1172	0.009132	0.0274
Methylation	PRAD	NTN3	pathology_N_stage (Wilcox Test)	-0.08932	0.0238	0.04454
Methylation	PRAD	NTN3	number_of_lymph_nodes (Kruskal-Wallis Test)	20.51	0.02474	0.04454
Methylation	SARC	NTN3	histological_type (Kruskal-Wallis Test)	37.58	4.498e-05	0.0003148
Methylation	THYM	NTN3	histological_type (Kruskal-Wallis Test)	45.41	1.199e-08	5.996e-08
Methylation	THYM	NTN3	years_to_birth (Spearman Correlation)	-0.3063	0.0006	0.0015
Methylation	UCEC	NTN3	MSI_phenotype (Wilcox Test)	-0.09986	4.79e-05	0.0002874
Expression	BLCA	NTN4	years_to_birth (Spearman Correlation)	-0.1686	0.0007427	0.00817
Expression	LGG	NTN4	overall_survival (Cox Regression Test)	-0.4046	9.799e-11	6.859e-10
Expression	LGG	NTN4	years_to_birth (Spearman Correlation)	-0.2822	3.057e-10	1.07e-09
Expression	LGG	NTN4	Tumor_purity (Spearman Correlation)	0.1854	4.3e-05	0.0001003
Expression	BRCA	NTN4	ER.Status (Wilcox Test)	0.1543	0.003495	0.008945
Expression	BRCA	NTN4	histological_type (Kruskal-Wallis Test)	92.68	8.413e-18	7.151e-17
Expression	BRCA	NTN4	PAM50 (Kruskal-Wallis Test)	238.8	1.692e-51	2.877e-50
Expression	BRCA	NTN4	pathologic_stage (Kruskal-Wallis Test)	19.14	0.0002559	0.0008699
Expression	BRCA	NTN4	pathology_T_stage (Kruskal-Wallis Test)	28	3.638e-06	1.546e-05
Expression	BRCA	NTN4	PR.Status (Wilcox Test)	0.1444	0.003683	0.008945
Expression	BRCA	NTN4	race (Kruskal-Wallis Test)	70.16	5.827e-16	3.302e-15
Expression	COADREAD	NTN4	overall_survival (Cox Regression Test)	0.7218	8.231e-05	0.001152
Expression	GBM	NTN4	years_to_birth (Spearman Correlation)	-0.3159	0.0001148	0.0008036
Expression	HNSC	NTN4	Tumor_purity (Spearman Correlation)	-0.2009	4.921e-06	5.905e-05
Expression	KIRC	NTN4	Tumor_purity (Spearman Correlation)	0.2995	3.583e-12	3.583e-11
Expression	KIRC	NTN4	overall_survival (Cox Regression Test)	-0.3122	1.61e-08	8.05e-08
Expression	KIRC	NTN4	pathology_T_stage (Kruskal-Wallis Test)	20.1	0.0001617	0.000539
Expression	KIRC	NTN4	pathologic_stage (Kruskal-Wallis Test)	17.13	0.0006639	0.00166
Expression	KIRC	NTN4	pathology_M_stage (Wilcox Test)	-0.06855	0.008068	0.01614
Expression	KIRC	NTN4	pathology_N_stage (Wilcox Test)	-0.09524	0.01588	0.02647
Expression	LIHC	NTN4	Tumor_purity (Spearman Correlation)	-0.1766	0.001022	0.01226
Expression	LUAD	NTN4	Tumor_purity (Spearman Correlation)	-0.233	1.711e-07	2.053e-06
Expression	LUSC	NTN4	Tumor_purity (Spearman Correlation)	-0.2806	5.055e-10	6.066e-09
Expression	OV	NTN4	years_to_birth (Spearman Correlation)	-0.2326	7.132e-05	0.0004279
Expression	OV	NTN4	Tumor_purity (Spearman Correlation)	-0.2095	0.0002974	0.0008922
Expression	PAAD	NTN4	histological_type (Kruskal-Wallis Test)	12.8	0.001658	0.0199
Expression	PAAD	NTN4	overall_survival (Cox Regression Test)	0.3252	0.003733	0.0224
Expression	PCPG	NTN4	histological_type (Kruskal-Wallis Test)	15.05	0.0005394	0.003776
Expression	PARD	NTN4	Tumor_purity (Spearman Correlation)	-0.2544	1.012e-08	9.108e-08
Expression	SARC	NTN4	histological_type (Kruskal-Wallis Test)	124.7	5.51e-22	3.857e-21
Expression	SARC	NTN4	years_to_birth (Spearman Correlation)	0.2464	7.194e-05	0.0002518
Expression	STAD	NTN4	histological_type (Kruskal-Wallis Test)	38.67	8.294e-07	9.953e-06
Expression	STAD	NTN4	number_of_lymph_nodes (Spearman Correlation)	0.1946	0.0003334	0.002
Expression	STAD	NTN4	overall_survival (Cox Regression Test)	0.2023	0.007839	0.03037
Expression	STAD	NTN4	race (Kruskal-Wallis Test)	9.186	0.01012	0.03037
Expression	STAD	NTN4	years_to_birth (Spearman Correlation)	-0.1279	0.01398	0.03355
Expression	TGCT	NTN4	radiation_therapy (Wilcox Test)	-0.264	2.188e-05	0.0001969
Expression	TGCT	NTN4	pathologic_stage (Kruskal-Wallis Test)	12.16	0.006855	0.03085
Expression	THYM	NTN4	histological_type (Kruskal-Wallis Test)	42.41	4.867e-08	2.434e-07
Expression	THCA	NTN4	Tumor_purity (Spearman Correlation)	-0.3523	9.073e-16	1.179e-14
Expression	THCA	NTN4	number_of_lymph_nodes (Spearman Correlation)	0.1775	0.0004745	0.003084
Expression	THCA	NTN4	pathology_N_stage (Wilcox Test)	0.04455	0.006389	0.02769
Expression	THCA	NTN4	histological_type (Kruskal-Wallis Test)	10.88	0.0124	0.04028
Expression	UCEC	NTN4	histological_type (Kruskal-Wallis Test)	16.26	0.0002939	0.001764
Methylation	BLCA	NTN4	Tumor_purity (Spearman Correlation)	-0.4114	1.097e-17	1.206e-16
Methylation	BLCA	NTN4	years_to_birth (Spearman Correlation)	0.1722	0.0005326	0.002929
Methylation	BLCA	NTN4	race (Kruskal-Wallis Test)	13.43	0.001215	0.004456
Methylation	LGG	NTN4	years_to_birth (Spearman Correlation)	-0.2576	1.024e-08	7.166e-08
Methylation	LGG	NTN4	overall_survival (Cox Regression Test)	-4.867	3.305e-08	1.157e-07
Methylation	LGG	NTN4	radiation_therapy (Wilcox Test)	-0.07573	0.002529	0.005901
Methylation	LGG	NTN4	Tumor_purity (Spearman Correlation)	0.111	0.0149	0.02607
Methylation	BRCA	NTN4	histological_type (Kruskal-Wallis Test)	30.75	2.826e-05	0.0004804
Methylation	BRCA	NTN4	PAM50 (Kruskal-Wallis Test)	15.98	0.001147	0.009753
Methylation	CESC	NTN4	histological_type (Kruskal-Wallis Test)	17.59	0.003506	0.03857
Methylation	COADREAD	NTN4	Tumor_purity (Spearman Correlation)	0.2182	1.877e-05	0.0002628
Methylation	GBM	NTN4	years_to_birth (Spearman Correlation)	0.275	0.001246	0.008723
Methylation	KICH	NTN4	Tumor_purity (Spearman Correlation)	-0.4275	0.0003828	0.003445
Methylation	KIRC	NTN4	Tumor_purity (Spearman Correlation)	-0.5695	1.044e-27	1.044e-26
Methylation	KIRC	NTN4	overall_survival (Cox Regression Test)	4.305	0.0003145	0.001572
Methylation	KIRC	NTN4	race (Kruskal-Wallis Test)	9.703	0.007816	0.02605
Methylation	KIRC	NTN4	pathology_T_stage (Kruskal-Wallis Test)	10.79	0.01294	0.03236
Methylation	KIRP	NTN4	Tumor_purity (Spearman Correlation)	-0.469	8.696e-16	8.696e-15
Methylation	KIRP	NTN4	pathology_T_stage (Kruskal-Wallis Test)	20.41	0.0001396	0.000698
Methylation	KIRP	NTN4	pathologic_stage (Kruskal-Wallis Test)	17.11	0.0006715	0.002238
Methylation	KIRP	NTN4	overall_survival (Cox Regression Test)	3.352	0.001011	0.002528
Methylation	KIRP	NTN4	pathology_N_stage (Kruskal-Wallis Test)	7.443	0.0242	0.0484
Methylation	LIHC	NTN4	Tumor_purity (Spearman Correlation)	0.2334	1.148e-05	0.0001378
Methylation	LUAD	NTN4	Tumor_purity (Spearman Correlation)	-0.2149	5.669e-06	6.803e-05
Methylation	DLBC	NTN4	years_to_birth (Spearman Correlation)	-0.4317	0.003067	0.01533
Methylation	PAAD	NTN4	overall_survival (Cox Regression Test)	-3.003	0.000845	0.01014
Methylation	PAAD	NTN4	pathologic_stage (Kruskal-Wallis Test)	13.15	0.004327	0.02596
Methylation	PAAD	NTN4	pathology_T_stage (Kruskal-Wallis Test)	11.19	0.01074	0.04298
Methylation	PRAD	NTN4	Tumor_purity (Spearman Correlation)	0.2153	1.366e-06	1.23e-05
Methylation	SARC	NTN4	histological_type (Kruskal-Wallis Test)	49.14	3.843e-07	2.69e-06
Methylation	SARC	NTN4	radiation_therapy (Wilcox Test)	-0.6001	3.797e-05	0.0001329
Methylation	SKCM	NTN4	Tumor_purity (Spearman Correlation)	0.5073	9.794e-08	8.815e-07
Methylation	STAD	NTN4	race (Kruskal-Wallis Test)	13.12	0.001414	0.01696
Methylation	THYM	NTN4	years_to_birth (Spearman Correlation)	-0.2831	0.001579	0.007896
Methylation	THCA	NTN4	histological_type (Kruskal-Wallis Test)	36.66	5.443e-08	7.076e-07
Methylation	THCA	NTN4	Tumor_purity (Spearman Correlation)	0.1939	1.49e-05	9.685e-05
Methylation	UCS	NTN4	histological_type (Kruskal-Wallis Test)	36.66	5.443e-08	7.076e-07
Methylation	UCS	NTN4	Tumor_purity (Spearman Correlation)	0.1939	1.49e-05	9.685e-05
Methylation	UCEC	NTN4	MSI_phenotype (Wilcox Test)	-0.4984	1.14e-12	6.841e-12
Methylation	UCEC	NTN4	histological_type (Kruskal-Wallis Test)	32.25	9.913e-08	2.974e-07
Expression	ACC	NTN5	Tumor_purity (Spearman Correlation)	0.4267	8.8e-05	0.001056
Expression	ACC	NTN5	overall_survival (Cox Regression Test)	0.2826	0.003996	0.01602
Expression	ACC	NTN5	pathology_N_stage (Wilcox Test)	0.6597	0.004006	0.01602
Expression	BLCA	NTN5	Tumor_purity (Spearman Correlation)	0.153	0.002237	0.0246
Expression	LGG	NTN5	histological_type (Kruskal-Wallis Test)	74.36	7.123e-17	4.986e-16
Expression	LGG	NTN5	Tumor_purity (Spearman Correlation)	-0.2246	6.497e-07	2.274e-06
Expression	LGG	NTN5	years_to_birth (Spearman Correlation)	-0.1229	0.006999	0.01633
Expression	BRCA	NTN5	race (Kruskal-Wallis Test)	53.22	2.771e-12	4.711e-11
Expression	BRCA	NTN5	histological_type (Kruskal-Wallis Test)	64.22	6.229e-12	5.294e-11
Expression	BRCA	NTN5	PAM50 (Kruskal-Wallis Test)	43.92	1.57e-09	8.896e-09
Expression	HNSC	NTN5	histological_type (Kruskal-Wallis Test)	12.71	0.001734	0.02081
Expression	HNSC	NTN5	number_of_lymph_nodes (Spearman Correlation)	0.1403	0.005163	0.02938
Expression	HNSC	NTN5	Tumor_purity (Spearman Correlation)	0.1187	0.007346	0.02938
Expression	HNSC	NTN5	radiation_therapy (Wilcox Test)	0.218	0.01531	0.04594
Expression	KICH	NTN5	Tumor_purity (Spearman Correlation)	0.3684	0.002534	0.02281
Expression	KIRC	NTN5	overall_survival (Cox Regression Test)	0.2238	0.0006711	0.006711
Expression	KIRC	NTN5	race (Kruskal-Wallis Test)	12.92	0.001565	0.007827
Expression	LIHC	NTN5	race (Kruskal-Wallis Test)	17.58	0.0005372	0.006446
Expression	LUAD	NTN5	race (Kruskal-Wallis Test)	21.62	7.832e-05	0.0009398
Expression	LUAD	NTN5	pathology_T_stage (Kruskal-Wallis Test)	14.03	0.002858	0.01715
Expression	LUSC	NTN5	Tumor_purity (Spearman Correlation)	0.1396	0.002319	0.02783
Expression	PAAD	NTN5	overall_survival (Cox Regression Test)	-0.3287	0.001237	0.01484
Expression	PCPG	NTN5	histological_type (Kruskal-Wallis Test)	11.94	0.002549	0.01784
Expression	SARC	NTN5	histological_type (Kruskal-Wallis Test)	68.55	8.447e-11	5.913e-10
Expression	THYM	NTN5	histological_type (Kruskal-Wallis Test)	22.25	0.0004703	0.002352
Expression	THCA	NTN5	histological_type (Kruskal-Wallis Test)	18.83	0.0002963	0.003852
Expression	THCA	NTN5	Tumor_purity (Spearman Correlation)	0.1341	0.002931	0.01905
Expression	THCA	NTN5	pathology_N_stage (Wilcox Test)	-0.1691	0.005381	0.02332
Methylation	ACC	NTN5	Tumor_purity (Spearman Correlation)	-0.7194	5.598e-14	6.717e-13
Methylation	ACC	NTN5	pathologic_stage (Kruskal-Wallis Test)	16.48	0.0009036	0.005421
Methylation	ACC	NTN5	pathology_T_stage (Kruskal-Wallis Test)	12.87	0.004916	0.01967
Methylation	ACC	NTN5	pathology_N_stage (Wilcox Test)	-0.124	0.01395	0.04184
Methylation	LGG	NTN5	Tumor_purity (Spearman Correlation)	0.4274	8.826e-23	6.178e-22
Methylation	LGG	NTN5	overall_survival (Cox Regression Test)	-6.376	4.188e-12	1.466e-11
Methylation	LGG	NTN5	histological_type (Kruskal-Wallis Test)	50.74	9.582e-12	2.236e-11
Methylation	LGG	NTN5	radiation_therapy (Wilcox Test)	-0.01602	1.947e-05	3.407e-05
Methylation	BRCA	NTN5	Tumor_purity (Spearman Correlation)	0.3403	4.609e-22	7.836e-21
Methylation	BRCA	NTN5	race (Kruskal-Wallis Test)	14.08	0.000874	0.007429
Methylation	BRCA	NTN5	histological_type (Kruskal-Wallis Test)	21.45	0.001522	0.008623
Methylation	BRCA	NTN5	Median_overall_survival (Wilcox Test)	0.01775	0.002167	0.00921
Methylation	COADREAD	NTN5	Tumor_purity (Spearman Correlation)	0.452	1.961e-20	2.746e-19
Methylation	HNSC	NTN5	Tumor_purity (Spearman Correlation)	-0.1475	0.0007705	0.009246
Methylation	HNSC	NTN5	pathologic_stage (Kruskal-Wallis Test)	12.27	0.006512	0.03907
Methylation	KIRC	NTN5	Tumor_purity (Spearman Correlation)	0.4001	3.408e-13	3.408e-12
Methylation	KIRC	NTN5	pathology_T_stage (Kruskal-Wallis Test)	20.18	0.0001556	0.0007781
Methylation	KIRC	NTN5	pathologic_stage (Kruskal-Wallis Test)	13.46	0.003733	0.01244
Methylation	KIRC	NTN5	pathology_N_stage (Wilcox Test)	-0.05431	0.01726	0.04316
Methylation	KIRP	NTN5	Tumor_purity (Spearman Correlation)	0.1781	0.003753	0.03753
Methylation	LIHC	NTN5	Tumor_purity (Spearman Correlation)	-0.1819	0.0006724	0.008069
Methylation	LUAD	NTN5	Tumor_purity (Spearman Correlation)	0.1676	0.0004268	0.005122
Methylation	LUAD	NTN5	pathology_T_stage (Kruskal-Wallis Test)	16.07	0.001098	0.006588
Methylation	LUAD	NTN5	radiation_therapy (Wilcox Test)	0.01563	0.01076	0.04303
Methylation	PAAD	NTN5	overall_survival (Cox Regression Test)	4.324	0.007373	0.04448
Methylation	PAAD	NTN5	pathologic_stage (Kruskal-Wallis Test)	11.99	0.007414	0.04448
Methylation	PRAD	NTN5	Tumor_purity (Spearman Correlation)	0.2096	2.606e-06	2.345e-05
Methylation	STAD	NTN5	histological_type (Kruskal-Wallis Test)	21.4	0.001553	0.01864
Methylation	THYM	NTN5	histological_type (Kruskal-Wallis Test)	34.23	2.143e-06	1.072e-05
Methylation	THCA	NTN5	histological_type (Kruskal-Wallis Test)	36.66	5.443e-08	7.076e-07
Methylation	THCA	NTN5	Tumor_purity (Spearman Correlation)	0.1939	1.49e-05	9.685e-05
Methylation	UCS	NTN5	Tumor_purity (Spearman Correlation)	-0.2991	1.261e-11	1.64e-10
Methylation	UCS	NTN5	histological_type (Kruskal-Wallis Test)	15.08	0.001748	0.01136
Methylation	UCEC	NTN5	histological_type (Kruskal-Wallis Test)	38.89	3.59e-09	2.154e-08
Expression	BLCA	NTNG1	Tumor_purity (Spearman Correlation)	-0.2164	1.365e-05	0.0001502
Expression	BLCA	NTNG1	pathologic_stage (Kruskal-Wallis Test)	21.28	9.224e-05	0.0005073
Expression	BLCA	NTNG1	overall_survival (Cox Regression Test)	0.1197	0.0002422	0.000888
Expression	BLCA	NTNG1	pathology_N_stage (Kruskal-Wallis Test)	17.59	0.0005353	0.001472
Expression	BLCA	NTNG1	number_of_lymph_nodes (Spearman Correlation)	0.1972	0.0007642	0.001681
Expression	BLCA	NTNG1	pathology_T_stage (Kruskal-Wallis Test)	16.85	0.002068	0.00346
Expression	BLCA	NTNG1	race (Kruskal-Wallis Test)	12.24	0.002202	0.00346
Expression	LGG	NTNG1	overall_survival (Cox Regression Test)	0.3135	3.039e-06	2.128e-05
Expression	LGG	NTNG1	Tumor_purity (Spearman Correlation)	-0.1991	1.086e-05	3.8e-05
Expression	BRCA	NTNG1	Tumor_purity (Spearman Correlation)	-0.2323	3.035e-14	5.16e-13
Expression	BRCA	NTNG1	histological_type (Kruskal-Wallis Test)	40.32	3.944e-07	3.352e-06
Expression	BRCA	NTNG1	race (Kruskal-Wallis Test)	14.8	0.0006101	0.003457
Expression	COADREAD	NTNG1	Tumor_purity (Spearman Correlation)	-0.4458	2.827e-19	3.958e-18
Expression	ESCA	NTNG1	pathology_T_stage (Kruskal-Wallis Test)	13.69	0.003364	0.037
Expression	HNSC	NTNG1	Tumor_purity (Spearman Correlation)	-0.2498	1.12e-08	1.343e-07
Expression	KIRC	NTNG1	Tumor_purity (Spearman Correlation)	-0.1878	1.73e-05	0.000173
Expression	KIRC	NTNG1	overall_survival (Cox Regression Test)	0.1234	0.0005231	0.002616
Expression	KIRC	NTNG1	pathology_T_stage (Kruskal-Wallis Test)	13.13	0.004367	0.01456
Expression	KIRC	NTNG1	pathology_N_stage (Wilcox Test)	1.178	0.006741	0.01685
Expression	KIRP	NTNG1	pathology_T_stage (Kruskal-Wallis Test)	14.94	0.001871	0.01266
Expression	KIRP	NTNG1	pathologic_stage (Kruskal-Wallis Test)	14.29	0.002532	0.01266
Expression	LIHC	NTNG1	Tumor_purity (Spearman Correlation)	-0.1938	0.0003066	0.00368
Expression	LUAD	NTNG1	Tumor_purity (Spearman Correlation)	-0.1948	1.35e-05	0.000162
Expression	LUSC	NTNG1	Tumor_purity (Spearman Correlation)	-0.329	2.004e-13	2.405e-12
Expression	LUSC	NTNG1	years_to_birth (Spearman Correlation)	0.1295	0.004988	0.02993
Expression	MESO	NTNG1	overall_survival (Cox Regression Test)	-0.1843	0.001512	0.01512
Expression	MESO	NTNG1	pathology_N_stage (Kruskal-Wallis Test)	12.49	0.005871	0.02936
Expression	PCPG	NTNG1	histological_type (Kruskal-Wallis Test)	11.94	0.002549	0.01784
Expression	PARD	NTNG1	Tumor_purity (Spearman Correlation)	-0.1509	0.0007735	0.006961
Expression	STAD	NTNG1	histological_type (Kruskal-Wallis Test)	37.72	1.273e-06	1.528e-05
Expression	STAD	NTNG1	overall_survival (Cox Regression Test)	0.1354	0.0006162	0.003697
Expression	STAD	NTNG1	years_to_birth (Spearman Correlation)	-0.159	0.002185	0.008741
Expression	STAD	NTNG1	pathology_T_stage (Kruskal-Wallis Test)	13.96	0.002963	0.008888
Expression	THCA	NTNG1	Tumor_purity (Spearman Correlation)	-0.4167	5.222e-22	6.789e-21
Expression	THCA	NTNG1	histological_type (Kruskal-Wallis Test)	21.7	7.54e-05	0.0004901
Expression	UCEC	NTNG1	MSI_phenotype (Wilcox Test)	1.124	0.002212	0.01327
Methylation	LGG	NTNG1	overall_survival (Cox Regression Test)	-4.698	1e-36	1e-36
Methylation	LGG	NTNG1	Tumor_purity (Spearman Correlation)	0.5313	2.183e-36	7.641e-36
Methylation	LGG	NTNG1	radiation_therapy (Wilcox Test)	-0.06748	5.696e-05	0.0001329
Methylation	LGG	NTNG1	histological_type (Kruskal-Wallis Test)	15	0.0005525	0.0009668
Methylation	LGG	NTNG1	years_to_birth (Spearman Correlation)	-0.1284	0.004839	0.006774
Methylation	BRCA	NTNG1	PAM50 (Kruskal-Wallis Test)	80.45	2.458e-17	4.178e-16
Methylation	BRCA	NTNG1	Tumor_purity (Spearman Correlation)	0.1205	0.0008751	0.006017
Methylation	BRCA	NTNG1	years_to_birth (Spearman Correlation)	0.1161	0.00141	0.006017
Methylation	BRCA	NTNG1	ER.Status (Wilcox Test)	0.2517	0.001416	0.006017
Methylation	BRCA	NTNG1	histological_type (Kruskal-Wallis Test)	17.8	0.006749	0.02295
Methylation	BRCA	NTNG1	PR.Status (Wilcox Test)	0.2946	0.01165	0.033
Methylation	COADREAD	NTNG1	Tumor_purity (Spearman Correlation)	0.371	8.875e-14	1.243e-12
Methylation	ESCA	NTNG1	race (Kruskal-Wallis Test)	34.51	3.209e-08	3.529e-07
Methylation	ESCA	NTNG1	pathology_T_stage (Kruskal-Wallis Test)	24.23	2.233e-05	0.0001228
Methylation	ESCA	NTNG1	years_to_birth (Spearman Correlation)	0.2594	0.0004895	0.001795
Methylation	ESCA	NTNG1	pathologic_stage (Kruskal-Wallis Test)	13.55	0.003578	0.009839
Methylation	ESCA	NTNG1	residual_tumor (Kruskal-Wallis Test)	8.542	0.01397	0.03073
Methylation	HNSC	NTNG1	years_to_birth (Spearman Correlation)	0.139	0.001507	0.01808
Methylation	KICH	NTNG1	overall_survival (Cox Regression Test)	103.9	0.002667	0.024
Methylation	KIRP	NTNG1	pathologic_stage (Kruskal-Wallis Test)	23.91	2.613e-05	0.0002613
Methylation	KIRP	NTNG1	pathology_T_stage (Kruskal-Wallis Test)	18	0.0004405	0.002203
Methylation	KIRP	NTNG1	pathology_N_stage (Kruskal-Wallis Test)	9.112	0.0105	0.03501
Methylation	LIHC	NTNG1	Tumor_purity (Spearman Correlation)	0.1667	0.001866	0.02239
Methylation	LUAD	NTNG1	Tumor_purity (Spearman Correlation)	0.1825	0.0001223	0.001467
Methylation	LUSC	NTNG1	Tumor_purity (Spearman Correlation)	0.211	6.927e-05	0.0008313
Methylation	LUSC	NTNG1	years_to_birth (Spearman Correlation)	-0.1481	0.005842	0.03505
Methylation	SARC	NTNG1	histological_type (Kruskal-Wallis Test)	29.33	0.0011	0.007697
Methylation	THYM	NTNG1	years_to_birth (Spearman Correlation)	-0.2587	0.00402	0.0201
Methylation	THYM	NTNG1	histological_type (Kruskal-Wallis Test)	14.29	0.01388	0.03117
Methylation	THYM	NTNG1	race (Kruskal-Wallis Test)	7.959	0.0187	0.03117
Methylation	UCEC	NTNG1	MSI_phenotype (Wilcox Test)	-0.03262	4.285e-07	2.571e-06
Methylation	UCEC	NTNG1	histological_type (Kruskal-Wallis Test)	8.578	0.01372	0.04116
Methylation	UVM	NTNG1	overall_survival (Cox Regression Test)	4.264	7.894e-05	0.0004736
Expression	LAML	NTNG2	years_to_birth (Spearman Correlation)	-0.2959	0.0002488	0.000995
Expression	LAML	NTNG2	overall_survival (Cox Regression Test)	-0.1205	0.004769	0.009538
Expression	ACC	NTNG2	Tumor_purity (Spearman Correlation)	0.4526	2.82e-05	0.0003384
Expression	ACC	NTNG2	overall_survival (Cox Regression Test)	0.3098	0.0004337	0.002602
Expression	BLCA	NTNG2	Tumor_purity (Spearman Correlation)	-0.5316	2.446e-30	2.691e-29
Expression	BLCA	NTNG2	pathologic_stage (Kruskal-Wallis Test)	23.82	2.717e-05	0.0001183
Expression	BLCA	NTNG2	pathology_T_stage (Kruskal-Wallis Test)	25.96	3.227e-05	0.0001183
Expression	BLCA	NTNG2	race (Kruskal-Wallis Test)	8.472	0.01446	0.03977
Expression	LGG	NTNG2	overall_survival (Cox Regression Test)	-0.6893	1e-27	1e-26
Expression	LGG	NTNG2	Tumor_purity (Spearman Correlation)	0.4638	5.031e-27	1.761e-26
Expression	LGG	NTNG2	histological_type (Kruskal-Wallis Test)	43.33	3.892e-10	9.081e-10
Expression	LGG	NTNG2	radiation_therapy (Wilcox Test)	-0.04828	1.621e-08	2.837e-08
Expression	LGG	NTNG2	years_to_birth (Spearman Correlation)	-0.1944	1.801e-05	2.522e-05
Expression	BRCA	NTNG2	Tumor_purity (Spearman Correlation)	-0.5001	4.144e-67	7.045e-66
Expression	BRCA	NTNG2	PAM50 (Kruskal-Wallis Test)	25.29	1.345e-05	0.0001143
Expression	BRCA	NTNG2	race (Kruskal-Wallis Test)	20.57	3.42e-05	0.0001938
Expression	BRCA	NTNG2	histological_type (Kruskal-Wallis Test)	25.9	0.000232	0.0009861
Expression	BRCA	NTNG2	years_to_birth (Spearman Correlation)	-0.07936	0.01057	0.03593
Expression	BRCA	NTNG2	Median_overall_survival (Wilcox Test)	-0.1512	0.01376	0.03899
Expression	CESC	NTNG2	Tumor_purity (Spearman Correlation)	-0.4154	9.938e-13	1.093e-11
Expression	COADREAD	NTNG2	Tumor_purity (Spearman Correlation)	-0.5739	1.915e-33	2.681e-32
Expression	ESCA	NTNG2	pathology_T_stage (Kruskal-Wallis Test)	24.06	2.425e-05	0.0002667
Expression	HNSC	NTNG2	Tumor_purity (Spearman Correlation)	-0.4278	4.585e-24	5.502e-23
Expression	KIRC	NTNG2	Tumor_purity (Spearman Correlation)	-0.3919	1.99e-20	1.99e-19
Expression	KIRC	NTNG2	overall_survival (Cox Regression Test)	0.2741	3.674e-08	1.837e-07
Expression	KIRC	NTNG2	pathology_T_stage (Kruskal-Wallis Test)	32.27	4.597e-07	1.532e-06
Expression	KIRC	NTNG2	pathologic_stage (Kruskal-Wallis Test)	31.6	6.362e-07	1.59e-06
Expression	KIRC	NTNG2	pathology_M_stage (Wilcox Test)	0.1993	0.0001643	0.0003286
Expression	KIRP	NTNG2	Tumor_purity (Spearman Correlation)	-0.3353	1.056e-08	1.056e-07
Expression	LIHC	NTNG2	Tumor_purity (Spearman Correlation)	-0.4118	1.787e-15	2.145e-14
Expression	LUAD	NTNG2	Tumor_purity (Spearman Correlation)	-0.3697	2.21e-17	2.652e-16
Expression	LUSC	NTNG2	Tumor_purity (Spearman Correlation)	-0.4004	1.108e-19	1.33e-18
Expression	OV	NTNG2	Tumor_purity (Spearman Correlation)	-0.3578	2.638e-10	1.583e-09
Expression	PCPG	NTNG2	histological_type (Kruskal-Wallis Test)	25.98	2.284e-06	1.599e-05
Expression	PCPG	NTNG2	years_to_birth (Spearman Correlation)	-0.2429	0.001324	0.004635
Expression	PRAD	NTNG2	overall_survival (Cox Regression Test)	-0.7941	0.002703	0.02432
Expression	SARC	NTNG2	histological_type (Kruskal-Wallis Test)	46.51	1.159e-06	8.11e-06
Expression	SKCM	NTNG2	Tumor_purity (Spearman Correlation)	-0.3702	0.0002053	0.001848
Expression	STAD	NTNG2	histological_type (Kruskal-Wallis Test)	43.31	1.013e-07	1.216e-06
Expression	STAD	NTNG2	pathology_T_stage (Kruskal-Wallis Test)	29.42	1.829e-06	1.097e-05
Expression	STAD	NTNG2	pathologic_stage (Kruskal-Wallis Test)	11.53	0.009189	0.03675
Expression	THYM	NTNG2	histological_type (Kruskal-Wallis Test)	19.74	0.001398	0.006989
Expression	THCA	NTNG2	Tumor_purity (Spearman Correlation)	-0.3797	2.988e-18	3.884e-17
Expression	THCA	NTNG2	years_to_birth (Spearman Correlation)	-0.1486	0.0008767	0.005699
Expression	THCA	NTNG2	histological_type (Kruskal-Wallis Test)	11.54	0.009129	0.03956
Expression	UCEC	NTNG2	Tumor_purity (Spearman Correlation)	-0.2378	0.002315	0.01389
Methylation	BLCA	NTNG2	Tumor_purity (Spearman Correlation)	0.1599	0.001371	0.01508
Methylation	LGG	NTNG2	Tumor_purity (Spearman Correlation)	-0.1508	0.000905	0.006335
Methylation	BRCA	NTNG2	Tumor_purity (Spearman Correlation)	0.169	2.802e-06	4.763e-05
Methylation	BRCA	NTNG2	race (Kruskal-Wallis Test)	11.92	0.002582	0.02195
Methylation	CESC	NTNG2	Tumor_purity (Spearman Correlation)	0.2233	0.0002105	0.002316
Methylation	COADREAD	NTNG2	Tumor_purity (Spearman Correlation)	0.3667	1.776e-13	2.487e-12
Methylation	ESCA	NTNG2	race (Kruskal-Wallis Test)	28.51	6.431e-07	7.074e-06
Methylation	ESCA	NTNG2	years_to_birth (Spearman Correlation)	0.2269	0.002256	0.01241
Methylation	ESCA	NTNG2	pathology_T_stage (Kruskal-Wallis Test)	13.45	0.003758	0.01378
Methylation	ESCA	NTNG2	pathologic_stage (Kruskal-Wallis Test)	10.71	0.01343	0.03694
Methylation	ESCA	NTNG2	pathology_N_stage (Kruskal-Wallis Test)	10.14	0.01739	0.03826
Methylation	GBM	NTNG2	race (Wilcox Test)	-0.05998	0.0009034	0.006324
Methylation	GBM	NTNG2	radiation_therapy (Wilcox Test)	0.06077	0.008914	0.0312
Methylation	GBM	NTNG2	histological_type (Kruskal-Wallis Test)	7.752	0.02074	0.04839
Methylation	KIRP	NTNG2	Tumor_purity (Spearman Correlation)	0.4503	1.54e-14	1.54e-13
Methylation	KIRP	NTNG2	overall_survival (Cox Regression Test)	-6.678	0.0007075	0.003538
Methylation	LIHC	NTNG2	years_to_birth (Spearman Correlation)	0.2456	3.801e-06	4.561e-05
Methylation	LIHC	NTNG2	race (Kruskal-Wallis Test)	16.85	0.0007598	0.004559
Methylation	PAAD	NTNG2	pathology_T_stage (Kruskal-Wallis Test)	14.82	0.001979	0.02375
Methylation	PRAD	NTNG2	Tumor_purity (Spearman Correlation)	0.3815	1.456e-18	1.311e-17
Methylation	THYM	NTNG2	histological_type (Kruskal-Wallis Test)	23.2	0.0003098	0.001549
Methylation	THCA	NTNG2	years_to_birth (Spearman Correlation)	0.4257	1.985e-23	2.581e-22
Methylation	THCA	NTNG2	pathologic_stage (Kruskal-Wallis Test)	42.72	2.821e-09	1.834e-08
Methylation	THCA	NTNG2	overall_survival (Cox Regression Test)	5.546	8.072e-06	3.498e-05
Methylation	THCA	NTNG2	Tumor_purity (Spearman Correlation)	0.1554	0.0005413	0.001759
Methylation	THCA	NTNG2	residual_tumor (Kruskal-Wallis Test)	7.774	0.02051	0.04986
Methylation	THCA	NTNG2	pathology_N_stage (Wilcox Test)	-0.04809	0.02301	0.04986
Methylation	UCEC	NTNG2	MSI_phenotype (Wilcox Test)	0.01039	0.002727	0.01636
