# Supplementary material for: The pan-cancer landscape of netrin family reveals potential oncogenic biomarkers
Source: Sci Rep. 2020 Mar 23;10:5224. doi: 10.1038/s41598-020-62117-5 (PMC7090012; doi:10.1038/s41598-020-62117-5)
Supplement: Supplementary file 6 — Dataset 6. [file 41598_2020_62117_MOESM6_ESM.xlsx]

## Sheet: Sheet1
The pan-cancer landscape of netrin family reveals potential oncogenic biomarkers
Wenjun Hao1,8, Meng Yu2,8, Jiaxing Lin3, Bitian Liu4, Haotian Xing3, Jieping Yang3, Dan Sun3, Feilong Chen3, Mingzhe Jiang3, Chaozhi Tang3, Xizhe Zhang5,6, Yongkang Zhao6,7 and Yuyan Zhu3,7*
1.Department of Urology, The First Affiliated Hospital of Dalian Medical University, Dalian 116011, China
2.Department of Reproductive Biology and Transgenic Animal, China Medical University, Shenyang 110001, China
3.Department of Urology, The First Affiliated Hospital of China Medical University, Shenyang 110001, China
4.Department of Urology, The Second Affiliated Hospital of China Medical University, Shenyang 110001, China
5.School of Computer Science and Engineering, Northeastern University, Shenyang, Liaoning, China
6.National Institute of Health and Medical Big Data, China Medical University, Shenyang, Liaoning, China
7.Joint Laboratory of Artificial Intelligence and Precision Medicine of China Medical University and Northeastern University, Northeastern University, Shenyang, Liaoning, China
8.These authors contributed equally
* Corresponding author: Yuyan Zhu, e-mail: yyzhu@cmu.edu.cn
	Breast	Breast	Breast	Breast	Breast	Breast	CNS	CNS	CNS	CNS	CNS	CNS	Kidney	Kidney	Kidney	Kidney	Kidney	Kidney	Kidney	Kidney	Lung	Lung	Lung	Lung	Lung	Lung	Lung	Lung	Lung	Melanoma	Melanoma	Melanoma	Melanoma	Melanoma	Melanoma	Melanoma	Melanoma	Melanoma	Ovary	Ovary	Ovary	Ovary	Ovary	Ovary	Ovary	Prostate	Prostate	Colon	Colon
	MS/MS count	MS/MS count	MS/MS count	MS/MS count	MS/MS count	MS/MS count	MS/MS count	MS/MS count	MS/MS count	MS/MS count	MS/MS count	MS/MS count	MS/MS count	MS/MS count	MS/MS count	MS/MS count	MS/MS count	MS/MS count	MS/MS count	MS/MS count	MS/MS count	MS/MS count	MS/MS count	MS/MS count	MS/MS count	MS/MS count	MS/MS count	MS/MS count	MS/MS count	MS/MS count	MS/MS count	MS/MS count	MS/MS count	MS/MS count	MS/MS count	MS/MS count	MS/MS count	MS/MS count	MS/MS count	MS/MS count	MS/MS count	MS/MS count	MS/MS count	MS/MS count	MS/MS count	MS/MS count	MS/MS count	MS/MS count	MS/MS count
	Breast	Breast	Breast	Breast	Breast	Breast	CNS	CNS	CNS	CNS	CNS	CNS	Kidney	Kidney	Kidney	Kidney	Kidney	Kidney	Kidney	Kidney	Lung	Lung	Lung	Lung	Lung	Lung	Lung	Lung	Lung	Melanoma	Melanoma	Melanoma	Melanoma	Melanoma	Melanoma	Melanoma	Melanoma	Melanoma	Ovary	Ovary	Ovary	Ovary	Ovary	Ovary	Ovary	Prostate	Prostate	Colon	Colon
	BT549	HS 578T	MCF7	MDA-MB-231	MDA-MB-468	T-47D	SF268	SF295	SF539	SNB-19	SNB-75	U251	786-O	A498	ACHN	CAKI	RXF 393	SN12C	TK-10	UO-31	A549	EKVX	HOP-62	HOP-92	NCI-H226	NCI-H23	NCI-H322M	NCI-H460	NCI-H522	LOX IMVI	M14	MALME-3M	MDA-MB-435	SK-MEL-2	SK-MEL-28	SK-MEL-5	UACC-257	UACC-62	IGROV1	OVCAR-3	OVCAR-4	OVCAR-5	OVCAR-8	SK-OV-3	NCI-ADR-RES	DU145	PC-3	Colo205	HCC 2998
NTN1	0	0	0	0	23	34	0	0	0	0	0	0	0	0	0	0	0	0	0	0	0	0	0	0	0	0	0	0	0	12	0	0	0	0	0	0	0	0	0	15	0	0	0	0	0	0	0	0	0
NTN4	0	6	0	0	20	0	0	0	18	6	3	6	0	0	0	0	0	40	0	20	3	1	0	0	1	0	0	5	3	0	0	0	0	0	0	0	0	0	40	0	0	1	0	31	0	1	10	0	0
[truncated: 11 more columns]
