# Supplementary material for: The pan-cancer landscape of netrin family reveals potential oncogenic biomarkers
Source: Sci Rep. 2020 Mar 23;10:5224. doi: 10.1038/s41598-020-62117-5 (PMC7090012; doi:10.1038/s41598-020-62117-5)
Supplement: Supplementary file 7 — Dataset 7. [file 41598_2020_62117_MOESM7_ESM.xlsx]

## Sheet: Title Page
The pan-cancer landscape of netrin family reveals potential oncogenic biomarkers
Wenjun Hao1,8, Meng Yu2,8, Jiaxing Lin3, Bitian Liu4, Haotian Xing3, Jieping Yang3, Dan Sun3, Feilong Chen3, Mingzhe Jiang3, Chaozhi Tang3, Xizhe Zhang5,6, Yongkang Zhao6,7 and Yuyan Zhu3,7*
1.Department of Urology, The First Affiliated Hospital of Dalian Medical University, Dalian 116011, China
2.Department of Reproductive Biology and Transgenic Animal, China Medical University, Shenyang 110001, China
3.Department of Urology, The First Affiliated Hospital of China Medical University, Shenyang 110001, China
4.Department of Urology, The Second Affiliated Hospital of China Medical University, Shenyang 110001, China
5.School of Computer Science and Engineering, Northeastern University, Shenyang, Liaoning, China
6.National Institute of Health and Medical Big Data, China Medical University, Shenyang, Liaoning, China
7.Joint Laboratory of Artificial Intelligence and Precision Medicine of China Medical University and Northeastern University, Northeastern University, Shenyang, Liaoning, China
8.These authors contributed equally
* Corresponding author: Yuyan Zhu, e-mail: yyzhu@cmu.edu.cn

## Sheet: NTN1
	RELA	RELA	EGR1	EGR1	EBF1	EBF1	ZNF552	ZNF552	ARNT	ARNT	SP1	SP1	SPDEF	SPDEF	TCF12	TCF12	TP53	TP53	CTCF	CTCF	MYC	MYC	PAX5	PAX5	YY1	YY1	ZBTB7A	ZBTB7A	NR2F2	NR2F2	EZH2	EZH2	HDAC2	HDAC2	CHD8	CHD8	RBBP5	RBBP5	SUZ12	SUZ12
Diseases or Studies	Pearson coefficient r	p-value(two tail, t-test)	Pearson coefficient r	p-value(two tail, t-test)	Pearson coefficient r	p-value(two tail, t-test)	Pearson coefficient r	p-value(two tail, t-test)	Pearson coefficient r	p-value(two tail, t-test)	Pearson coefficient r	p-value(two tail, t-test)	Pearson coefficient r	p-value(two tail, t-test)	Pearson coefficient r	p-value(two tail, t-test)	Pearson coefficient r	p-value(two tail, t-test)	Pearson coefficient r	p-value(two tail, t-test)	Pearson coefficient r	p-value(two tail, t-test)	Pearson coefficient r	p-value(two tail, t-test)	Pearson coefficient r	p-value(two tail, t-test)	Pearson coefficient r	p-value(two tail, t-test)	Pearson coefficient r	p-value(two tail, t-test)	Pearson coefficient r	p-value(two tail, t-test)	Pearson coefficient r	p-value(two tail, t-test)	Pearson coefficient r	p-value(two tail, t-test)	Pearson coefficient r	p-value(two tail, t-test)	Pearson coefficient r	p-value(two tail, t-test)
cholangiocarcinoma	-0.4425	0.00234	0.136	0.373	-0.0134	0.93	-0.0782	0.61	0.0146	0.924	-0.303	0.043	0.058	0.705	-0.2334	0.123	-0.2802	0.0623	-0.3693	0.0125	-0.1973	0.194	0.147	0.335	0.0354	0.817	-0.3284	0.0276	-0.3625	0.0144	-0.2726	0.07	-0.2246	0.138	-0.46	0.00148	-0.0632	0.68	-0.2286	0.131
diffuse large B-cell lymphoma	0.1611	0.279	0.1445	0.332	-0.1262	0.398	0.3057	0.0366	0.1293	0.386	0.1359	0.363	-0.0093	0.951	0.1452	0.33	0.1768	0.234	0.0378	0.801	-0.0966	0.518	-0.1923	0.195	0.1278	0.392	0.2156	0.146	0.2942	0.0448	-0.0113	0.94	-0.1527	0.305	0.1354	0.364	0.0846	0.572	0.1632	0.273
uterine carcinosarcoma	0.0918	0.497	0.2717	0.0409	-0.0482	0.722	0.4837	0.000138	0.178	0.185	0.4152	0.00132	0.2971	0.0248	0.4008	0.002	-0.0177	0.896	0.215	0.108	0.0716	0.597	-0.1085	0.422	0.355	0.00674	0.4004	0.00203	0.1128	0.404	-0.1014	0.453	-0.0558	0.68	-0.2421	0.0696	0.192	0.152	0.3812	0.00343
adrenocortical cancer	0.0386	0.739	-0.0364	0.753	0.4056	0.000253	-0.1197	0.3	-0.0752	0.516	0.0608	0.599	0.134	0.245	0.0998	0.388	0.0869	0.452	0.173	0.132	-0.0351	0.762	0.2208	0.0537	0.4291	9.88e-05	0.381	0.000629	-0.0119	0.918	0.018	0.876	0.1291	0.263	0.0503	0.664	0.0469	0.685	0.0568	0.624
uveal melanoma	0.0174	0.879	0.2317	0.04	0.5066	1.9e-06	-0.0079	0.945	0.1807	0.111	0.0922	0.419	-0.0667	0.559	0.283	0.0115	0.2721	0.0153	0.0179	0.876	0.0535	0.639	0.1683	0.138	0.1338	0.24	0.1884	0.0964	0.3085	0.00567	0.3359	0.00248	0.036	0.752	0.4045	0.000218	0.1904	0.0928	0.1665	0.143
mesothelioma	0.0723	0.506	0.0531	0.625	-0.0224	0.837	0.2342	0.029	0.0028	0.98	0.3739	0.000361	0.0027	0.98	0.4083	8.65e-05	0.4106	7.8e-05	0.3597	0.000622	0.0721	0.507	0.1737	0.108	0.2485	0.0203	0.0166	0.878	0.142	0.19	0.045	0.679	0.1851	0.086	0.3277	0.00195	0.0531	0.625	0.2211	0.0396
kidney chromophobe	0.1047	0.323	-0.4738	2.1e-06	-0.4513	7.14e-06	-0.1347	0.203	-0.5611	7.26e-09	-0.2607	0.0126	0.28	0.0072	-0.225	0.032	-0.4282	2.29e-05	-0.2637	0.0115	-0.4406	1.24e-05	0.0412	0.698	-0.2532	0.0154	0.4549	5.89e-06	-0.5793	1.79e-09	0.0787	0.458	-0.567	4.65e-09	0.0896	0.399	-0.4068	6.29e-05	0.0681	0.521
rectum adenocarcinoma	-0.0008	0.993	0.3481	0.000314	0.5461	2.42e-09	0.1509	0.128	0.4277	6.6e-06	0.2201	0.0255	0.3915	4.32e-05	0.1073	0.281	-0.0785	0.431	0.0052	0.958	-0.2533	0.00985	0.4983	8.52e-08	0.0763	0.444	0.0607	0.543	0.4543	1.43e-06	-0.4501	1.85e-06	-0.2161	0.0283	-0.0812	0.415	-0.1753	0.0765	-0.0529	0.595
thymoma	-0.0749	0.414	0.355	6.44e-05	0.2497	0.00574	0.045	0.624	0.315	0.000433	0.5604	2.32e-11	0.3264	0.000259	0.0522	0.57	-0.2843	0.00158	-0.0679	0.459	-0.0442	0.63	-0.2872	0.0014	0.3549	6.51e-05	0.1094	0.232	0.6552	3.56e-16	-0.4056	3.94e-06	0.0377	0.682	-0.3977	6.28e-06	-0.0038	0.967	0.0393	0.668
testicular germ cell tumor	0.0953	0.24	0.3117	8.3e-05	0.4476	5.89e-09	-0.0776	0.339	0.217	0.00688	0.216	0.00713	0.7735	6.53e-32	0.2357	0.00326	0.4221	4.97e-08	0.3445	1.21e-05	0.4033	2.15e-07	-0.6055	8.84e-17	-0.2036	0.0113	-0.1045	0.197	0.5974	2.88e-16	0.1789	0.0264	0.2109	0.00865	-0.2266	0.00471	-0.5343	9.6e-13	0.0085	0.916
glioblastoma multiforme	0.4881	1.27e-11	0.218	0.00417	-0.0459	0.551	0.0562	0.465	0.028	0.717	0.3369	6.63e-06	-0.1831	0.0165	0.3929	1.06e-07	0.4021	5.01e-08	0.3529	2.2e-06	0.2866	0.000144	0.0644	0.402	0.1639	0.0322	0.0965	0.209	-0.1329	0.0831	0.3297	1.06e-05	0.0302	0.695	0.2094	0.00598	-0.0538	0.485	0.3081	4.14e-05
pancreatic adenocarcinoma	0.0608	0.413	0.1463	0.0481	0.0586	0.431	0.1277	0.0849	0.1445	0.051	0.1688	0.0224	-0.0412	0.58	0.1226	0.0982	0.0933	0.209	0.0739	0.32	0.072	0.333	-0.033	0.657	0.0689	0.354	0.051	0.493	0.2646	0.000295	0.0851	0.252	0.2061	0.00513	0.0092	0.902	0.0069	0.926	0.1194	0.108
pheochromocytoma & paraganglioma	0.2202	0.0026	-0.031	0.675	0.2657	0.000257	0.1954	0.00768	0.2416	0.000921	0.233	0.00141	-0.0066	0.928	0.2758	0.000144	0.2128	0.00364	0.08	0.279	0.2753	0.000149	0.089	0.228	0.0692	0.349	0.0574	0.437	0.4241	1.79e-09	-0.0308	0.677	0.2103	0.00406	-0.0302	0.684	0.0889	0.229	0.3045	2.5e-05
esophageal carcinoma	0.0306	0.671	0.2301	0.00121	0.3255	3.42e-06	-0.0589	0.413	0.1057	0.141	0.1315	0.067	-0.1108	0.123	-0.0346	0.631	0.0904	0.209	-0.0359	0.619	-0.0274	0.704	-0.1647	0.0214	-0.0614	0.394	0.0367	0.611	0.1731	0.0155	-0.1413	0.0488	-0.082	0.255	0.0194	0.788	-0.0292	0.686	-0.1021	0.155
uterine corpus endometrioid carcinoma	0.1441	0.0398	0.1221	0.0819	0.182	0.00919	0.3128	5.24e-06	0.1106	0.115	0.1756	0.012	0.314	4.79e-06	0.2042	0.0034	0.1449	0.0386	0.1228	0.0801	0.117	0.0956	-0.1763	0.0117	0.1211	0.0844	0.1973	0.00467	0.1882	0.00703	-0.1153	0.101	0.1945	0.00531	-0.0139	0.843	-0.0057	0.936	0.0869	0.217
sarcoma	0.0274	0.658	0.0625	0.312	-0.0192	0.756	0.1015	0.0997	0.074	0.231	0.073	0.237	0.0052	0.933	0.18	0.00333	0.0925	0.134	-0.0118	0.849	-0.1702	0.00557	-0.1182	0.0551	0.0615	0.32	-0.086	0.164	0.3226	8.26e-08	-0.041	0.507	-0.0008	0.99	0.0568	0.358	0.1499	0.0147	0.1333	0.0303
cervical & endocervical cancer	0.1132	0.0469	0.1941	0.0006	0.14	0.0138	0.166	0.00343	0.1196	0.0356	0.1652	0.0036	0.2207	9.18e-05	0.2963	1.12e-07	0.3289	3.14e-09	0.2845	3.67e-07	-0.2045	0.000297	0.1029	0.0708	0.2101	0.000199	-0.0171	0.765	0.3907	1.05e-12	0.0901	0.114	0.1658	0.00347	0.1329	0.0195	0.1331	0.0193	0.254	6.14e-06
kidney papillary cell carcinoma	0.1725	0.00192	0.2353	2.06e-05	0.5062	2.73e-22	0.4566	6.13e-18	0.2701	8.99e-07	-0.0173	0.758	0.0144	0.797	0.3013	3.69e-08	-0.1611	0.0038	0.1584	0.00445	-0.1507	0.00684	0.2284	3.61e-05	0.2899	1.24e-07	0.1732	0.00184	0.0935	0.0943	-0.2143	0.000109	0.2298	3.22e-05	-0.1803	0.00118	0.4449	5.19e-17	0.2833	2.45e-07
colon adenocarcinoma	0.0964	0.0799	0.1661	0.00243	0.5712	4.7e-30	-0.0064	0.907	0.5263	5.65e-25	0.1206	0.0282	0.2915	6.65e-08	-0.0187	0.735	-0.0232	0.674	-0.0237	0.667	-0.4089	8.92e-15	0.384	4.51e-13	-0.0752	0.172	0.265	1.01e-06	0.4356	9.23e-17	-0.5026	1.36e-22	-0.3924	1.25e-13	-0.0376	0.495	-0.0823	0.135	-0.2834	1.56e-07
liver hepatocellular carcinoma	-0.0015	0.975	0.0101	0.836	-0.0137	0.779	0.0733	0.133	0.2609	5.61e-08	0.0247	0.613	-0.1553	0.00139	0.0527	0.281	0.0847	0.0825	-0.0763	0.118	-0.1351	0.00548	-0.0323	0.509	0.0672	0.168	0.0361	0.46	0.1072	0.0279	-0.0206	0.673	-0.1666	0.000596	-0.0721	0.14	0.1379	0.0046	0.0395	0.419
ovarian serous cystadenocarcinoma	0.2121	1.04e-05	0.1654	0.000618	0.1453	0.00267	0.1916	7.04e-05	0.1911	7.34e-05	0.1694	0.000454	-0.0311	0.523	0.0309	0.525	0.0028	0.955	0.0504	0.3	0.1455	0.00264	0.0253	0.603	0.0664	0.172	0.3086	7.87e-11	0.1325	0.00621	-0.0418	0.39	-0.1573	0.00114	-0.0308	0.527	0.0864	0.0751	0.0425	0.383
bladder urothelial carcinoma	0.0503	0.3	0.4482	1.94e-22	0.414	4.54e-19	-0.3291	3.24e-12	0.1801	0.000187	-0.0619	0.203	-0.1254	0.00957	0.1712	0.000386	0.0066	0.892	-0.0363	0.456	0.2918	8.25e-10	0.2844	2.29e-09	-0.0088	0.855	-0.157	0.00115	0.039	0.422	0.044	0.365	-0.0706	0.146	-0.154	0.00143	0.1493	0.00201	0.0107	0.825
stomach adenocarcinoma	0.0417	0.378	0.3735	2.42e-16	0.4806	2.18e-27	-0.0365	0.439	0.2169	3.42e-06	-0.0993	0.0352	-0.0935	0.0475	0.0253	0.592	0.02	0.673	-0.2984	1.04e-10	-0.1164	0.0135	0.1832	9.27e-05	-0.3268	1.16e-12	0.1745	0.0002	0.4028	5.58e-19	-0.5357	8.72e-35	-0.3891	1.03e-17	-0.0692	0.143	-0.2464	1.19e-07	-0.3484	2.75e-14
skin cutaneous melanoma	0.0468	0.311	0.0833	0.0713	0.0983	0.0331	-0.0848	0.0663	-0.0054	0.907	-0.1052	0.0226	0.0785	0.089	-0.1302	0.00471	0.1181	0.0104	-0.1197	0.00938	-0.1238	0.00721	-0.0338	0.465	-0.0794	0.0857	0.1357	0.00319	-0.1007	0.029	-0.0324	0.483	-0.1293	0.00499	-0.0411	0.374	-0.1115	0.0156	-0.1257	0.00638
brain lower grade glioma	0.4403	3.31e-26	0.0451	0.303	0.1836	2.4e-05	0.2404	2.61e-08	0.1671	0.000123	0.3938	7.55e-21	-0.3424	7.82e-16	0.3165	1.25e-13	0.3661	4.94e-18	0.2368	4.25e-08	0.4096	1.42e-22	-0.1111	0.011	0.2512	5.72e-09	-0.379	2.63e-19	-0.0234	0.593	0.2591	1.8e-09	0.2772	1.12e-10	0.1225	0.00502	-0.0477	0.276	0.2641	8.59e-10
prostate adenocarcinoma	0.1651	0.000103	0.3801	2.84e-20	0.4377	4.69e-27	0.1406	0.000963	0.3344	8.85e-16	0.3246	6.49e-15	-0.0692	0.106	0.2982	1.02e-12	0.1243	0.00357	0.219	2.24e-07	-0.0853	0.0459	0.1796	2.35e-05	0.1021	0.0168	0.3003	6.92e-13	0.3528	1.67e-17	-0.326	4.93e-15	0.1732	4.59e-05	-0.1435	0.000754	0.1967	3.48e-06	0.1714	5.5e-05
lung squamous cell carcinoma	0.0792	0.0639	0.0468	0.275	0.019	0.658	0.1138	0.00764	0.125	0.00337	0.229	5.92e-08	-0.0504	0.239	0.1929	5.4e-06	0.0762	0.0745	0.1706	5.98e-05	-0.0396	0.355	0.0417	0.329	-0.0355	0.407	0.1642	0.000113	0.2605	5.94e-10	0.0802	0.0605	0.0671	0.116	0.0998	0.0194	0.0204	0.633	0.1058	0.0132
head & neck squamous cell carcinoma	0.0972	0.021	0.2445	4.02e-09	0.329	1.05e-15	0.3198	7.12e-15	0.3248	2.53e-15	0.4145	7.91e-25	0.228	4.41e-08	0.4181	2.82e-25	0.3469	2.13e-17	0.2872	3.58e-12	-0.075	0.075	0.0278	0.511	0.1225	0.00357	0.1367	0.00113	0.395	1.67e-22	0.165	8.22e-05	0.2439	4.41e-09	-0.0307	0.467	0.2235	8.09e-08	0.3241	2.93e-15
thyroid carcinoma	-0.0978	0.0194	0.3256	1.44e-15	0.3016	1.79e-13	0.162	0.000101	0.1123	0.00725	0.1635	8.67e-05	-0.1137	0.00655	0.2845	4.28e-12	0.0428	0.308	0.0966	0.021	0.3624	3.65e-19	0.1677	5.67e-05	-0.1047	0.0123	-0.0051	0.904	0.2551	6.24e-10	-0.0087	0.836	0.1692	4.85e-05	-0.0425	0.311	0.1118	0.0075	0.1339	0.00134
lung adenocarcinoma	0.1284	0.00206	0.2061	6.31e-07	0.2054	6.89e-07	0.1466	0.000426	0.1614	0.000103	0.1875	6.12e-06	-0.008	0.848	0.1231	0.00313	0.1388	0.000855	0.1289	0.00198	-0.0595	0.155	0.1005	0.016	-0.0214	0.608	0.2618	1.89e-10	0.2111	3.32e-07	-0.0646	0.122	0.0984	0.0184	0.1677	5.37e-05	0.0075	0.859	0.0807	0.0533
kidney clear cell carcinoma	-0.1442	0.000384	0.069	0.0904	-0.1875	3.56e-06	0.4408	4.74e-30	-0.0771	0.0586	-0.1701	2.69e-05	-0.1386	0.000641	0.0971	0.0171	-0.2143	1.08e-07	0.0857	0.0353	-0.3678	9.32e-21	-0.0731	0.073	-0.0231	0.572	0.1261	0.00192	0.0504	0.216	-0.3885	3.64e-23	0.0519	0.204	-0.0453	0.267	0.1853	4.65e-06	0.1948	1.44e-06
breast invasive carcinoma	0.1035	0.000308	0.0548	0.0565	-0.0196	0.495	-0.0732	0.0108	0.1429	5.84e-07	0.0614	0.0325	-0.1281	7.66e-06	0.0613	0.0328	0.118	3.81e-05	-0.047	0.102	0.1628	1.21e-08	0.044	0.125	0	1	-0.0149	0.605	0.0541	0.0599	0.064	0.026	0.0911	0.00151	-0.0006	0.983	0.0236	0.411	0.0578	0.0444

## Sheet: NTN3
	AR	AR	ARNT	ARNT	BHLHE40	BHLHE40	CTCF	CTCF	E2F6	E2F6	EGR1	EGR1	KDM5A	KDM5A	KDM5B	KDM5B	KLF5	KLF5	MAX	MAX	MAZ	MAZ	MYC	MYC	SP1	SP1	SPDEF	SPDEF	T	T	TEAD4	TEAD4	USF1	USF1	ZBTB7A	ZBTB7A	ZNF552	ZNF552	EZH2	EZH2	HDAC1	HDAC1	RBBP5	RBBP5	SUZ12	SUZ12	CHD1	CHD1	SAP30
Diseases or Studies	Pearson coefficient r	p-value(two tail, t-test)	Pearson coefficient r	p-value(two tail, t-test)	Pearson coefficient r	p-value(two tail, t-test)	Pearson coefficient r	p-value(two tail, t-test)	Pearson coefficient r	p-value(two tail, t-test)	Pearson coefficient r	p-value(two tail, t-test)	Pearson coefficient r	p-value(two tail, t-test)	Pearson coefficient r	p-value(two tail, t-test)	Pearson coefficient r	p-value(two tail, t-test)	Pearson coefficient r	p-value(two tail, t-test)	Pearson coefficient r	p-value(two tail, t-test)	Pearson coefficient r	p-value(two tail, t-test)	Pearson coefficient r	p-value(two tail, t-test)	Pearson coefficient r	p-value(two tail, t-test)	Pearson coefficient r	p-value(two tail, t-test)	Pearson coefficient r	p-value(two tail, t-test)	Pearson coefficient r	p-value(two tail, t-test)	Pearson coefficient r	p-value(two tail, t-test)	Pearson coefficient r	p-value(two tail, t-test)	Pearson coefficient r	p-value(two tail, t-test)	Pearson coefficient r	p-value(two tail, t-test)	Pearson coefficient r	p-value(two tail, t-test)	Pearson coefficient r	p-value(two tail, t-test)	Pearson coefficient r	p-value(two tail, t-test)	Pearson coefficient r
cholangiocarcinoma	0.3568	0.0161	0.335	0.0245	-0.0753	0.623	-0.3663	0.0133	-0.2878	0.0552	0.343	0.0211	-0.0626	0.683	-0.1364	0.372	-0.3092	0.0388	-0.4525	0.00181	-0.2805	0.062	-0.1404	0.358	-0.2267	0.134	-0.3986	0.00669	-0.113	0.46	-0.4307	0.00315	-0.3226	0.0307	-0.3301	0.0268	-0.1763	0.247	-0.3839	0.00923	-0.4997	0.000475	0.0167	0.913	-0.1488	0.329	-0.2836	0.059	-0.2177
diffuse large B-cell lymphoma	0.1999	0.178	0.3325	0.0224	0.1823	0.22	0.4407	0.00193	0.1394	0.35	0.1892	0.203	0.4058	0.00466	0.3093	0.0344	0.1328	0.374	-0.0792	0.597	0.0775	0.605	0.3395	0.0196	0.4434	0.0018	-0.2963	0.0431	-0.1303	0.383	-0.2065	0.164	-0.2008	0.176	0.1728	0.245	0.1279	0.391	0.1562	0.294	0.2835	0.0534	0.4578	0.00121	0.5187	0.000188	0.2648	0.0721	-0.0136
uterine carcinosarcoma	0.2482	0.0626	0.5251	2.75e-05	-0.0866	0.522	0.3904	0.00268	0.2602	0.0506	-0.115	0.394	0.3347	0.0109	0.3051	0.021	0.0532	0.694	-0.2799	0.035	0.2799	0.035	0.2192	0.101	0.4269	0.000928	-0.2271	0.0894	0.1926	0.151	0.0881	0.515	-0.5018	6.98e-05	-0.3769	0.00385	0.0348	0.797	0.1291	0.338	-0.2369	0.076	0.2664	0.0452	0.5439	1.23e-05	0.3383	0.0101	-0.2073
adrenocortical cancer	0.082	0.478	-0.0942	0.415	0.1417	0.219	0.2622	0.0213	0.2585	0.0232	0.2175	0.0574	0.3209	0.00444	0.4095	0.000217	0.0094	0.935	0.1541	0.181	0.3822	0.000604	0.2666	0.0191	0.2143	0.0613	0.2185	0.0563	0.1733	0.132	-0.0127	0.912	-0.0967	0.403	0.1876	0.102	0.1555	0.177	0.3843	0.00056	0.0729	0.529	0.2468	0.0305	0.2687	0.0181	0.1286	0.265	0.1658
uveal melanoma	0.1089	0.339	0.3987	0.000273	0.2568	0.0223	0.4534	2.72e-05	0.3292	0.00306	0.0216	0.85	0.3317	0.00282	0.476	9.24e-06	0.423	0.000103	-0.181	0.11	0.0544	0.634	0.5316	4.63e-07	0.3909	0.000369	0.1043	0.361	-0.1255	0.27	-0.0319	0.78	0.0575	0.615	-0.0177	0.877	0.1958	0.0838	0.0706	0.536	-0.0124	0.913	0.2817	0.0119	0.2368	0.0357	0.1112	0.329	-0.0222
mesothelioma	0.3043	0.00416	0.3464	0.00101	-0.2536	0.0178	0.4563	8.91e-06	0.3408	0.00124	0.0297	0.785	0.3791	0.000293	0.3812	0.00027	0.1149	0.289	-0.082	0.45	0.397	0.000141	-0.0224	0.837	0.5355	9.11e-08	0.0034	0.975	0.206	0.0555	-0.243	0.0233	0.1065	0.326	-0.0634	0.56	0.2242	0.0368	0.2771	0.00938	-0.0011	0.992	0.3678	0.000457	0.1358	0.21	0.2125	0.0482	-0.253
kidney chromophobe	0.1422	0.179	-0.1977	0.0603	0.0376	0.723	0.1185	0.263	-0.1056	0.319	-0.3112	0.00267	0.2739	0.00862	0.0904	0.394	-0.2257	0.0315	0.3695	0.000313	0.4961	5.72e-07	0.008	0.94	0.2171	0.0388	0.3569	0.000514	-0.1095	0.301	-0.161	0.127	-0.075	0.48	0.2419	0.0209	-0.1603	0.129	0.337	0.00109	-0.0516	0.627	-0.0475	0.655	0.2126	0.043	0.118	0.265	0.0097
rectum adenocarcinoma	0.3492	0.000301	0.2654	0.00674	0.1598	0.107	-0.007	0.944	-0.0936	0.347	0.337	0.0005	0.0803	0.42	0.0879	0.377	-0.1875	0.058	0.0851	0.392	-0.072	0.47	-0.0935	0.347	0.0803	0.42	0.1549	0.118	0.068	0.495	-0.2652	0.00678	-0.036	0.718	0.017	0.865	-0.011	0.912	-0.2433	0.0133	0.0309	0.756	-0.0977	0.326	-0.1424	0.151	-0.0431	0.666	-0.0414
thymoma	0.0486	0.597	0.4599	1.11e-07	0.413	2.51e-06	-0.0649	0.479	0.3955	7.12e-06	0.2642	0.00341	0.5093	2.44e-09	0.3832	1.43e-05	0.3266	0.000256	-0.0388	0.673	-0.2421	0.00747	0.3151	0.000431	0.4092	3.17e-06	0.0911	0.32	0.1379	0.132	0.0476	0.604	-0.3359	0.000165	0.3088	0.000568	0.4169	1.97e-06	-0.1258	0.169	-0.0345	0.707	0.4002	5.41e-06	0.2522	0.00526	0.0762	0.406	-0.1035
testicular germ cell tumor	0.3132	7.64e-05	0.6502	7.18e-20	0.0581	0.474	0.3335	2.38e-05	0.0689	0.396	0.3436	1.28e-05	0.4529	3.69e-09	0.2804	0.000429	0.3247	3.98e-05	0.019	0.815	0.2714	0.000663	0.2577	0.00125	0.4067	1.66e-07	0.605	9.64e-17	-0.2917	0.000242	-0.497	5.54e-11	-0.1765	0.0285	0.0937	0.248	-0.1502	0.063	0.0712	0.38	0.0628	0.439	-0.1341	0.0972	0.3029	0.000134	-0.046	0.571	0.1985
glioblastoma multiforme	0.2102	0.00579	0.298	7.54e-05	0.0587	0.446	0.4037	4.38e-08	0.1187	0.122	0.1278	0.0959	0.2893	0.000124	0.3165	2.48e-05	0.0489	0.526	-0.1161	0.131	0.4244	7.27e-09	0.0373	0.628	0.393	1.06e-07	0.034	0.659	0.0458	0.552	-0.1715	0.0249	-0.0766	0.319	0.2418	0.00144	-0.1296	0.091	0.2671	0.000413	0.0426	0.58	0.2017	0.00817	0.407	3.31e-08	0.2245	0.00315	-0.0539
pancreatic adenocarcinoma	0.2002	0.00659	0.2316	0.00161	-0.0782	0.293	0.0949	0.201	0.1555	0.0356	0.1823	0.0135	0.1379	0.0627	-0.018	0.809	-0.2135	0.00371	0.1103	0.137	0.0736	0.322	0.1706	0.0209	0.0921	0.215	-0.1948	0.00823	0.0578	0.437	-0.1847	0.0123	0.0372	0.617	0.0213	0.774	0.1921	0.00917	-0.0589	0.428	-0.0722	0.331	0.12	0.106	0.1196	0.107	0.1998	0.0067	0.0921
pheochromocytoma & paraganglioma	-0.1663	0.0237	0.2389	0.00106	0.0421	0.569	0.2839	9e-05	0.2666	0.000244	0.2046	0.00522	0.4773	6.45e-12	0.3614	4.31e-07	-0.0063	0.932	-0.1672	0.0229	0.0157	0.832	-0.102	0.167	0.1946	0.00793	-0.1281	0.0823	0.1146	0.12	-0.3409	2.05e-06	-0.2158	0.00318	0.5665	4.28e-17	0.1887	0.0101	0.1616	0.028	-0.2051	0.00511	0.512	9.38e-14	0.1446	0.0496	-0.0145	0.844	0.2252
esophageal carcinoma	0.2637	0.000195	0.3261	3.28e-06	0.0141	0.845	0.3299	2.48e-06	0.3552	3.48e-07	0.2935	3.12e-05	0.3146	7.48e-06	0.3885	1.99e-08	-0.1595	0.026	0.1366	0.057	0.301	1.9e-05	-0.0013	0.986	0.2258	0.0015	-0.3654	1.5e-07	0.2285	0.00131	0.131	0.0679	0.0696	0.333	-0.2104	0.00315	-0.1046	0.146	0.2294	0.00125	-0.0398	0.581	0.283	6.11e-05	0.2214	0.00186	0.0792	0.271	0.1653
uterine corpus endometrioid carcinoma	0.1243	0.0766	0.3592	1.31e-07	0.0032	0.964	0.2418	0.000492	0.2632	0.000143	0.0717	0.308	0.2346	0.000731	0.303	1.05e-05	-0.0781	0.267	0.1714	0.0142	0.079	0.261	0.1436	0.0405	0.2317	0.000853	-0.029	0.68	0.2469	0.000371	0.0194	0.783	-0.125	0.0748	-0.1522	0.0297	0.1721	0.0138	0.2068	0.003	0.1665	0.0173	0.2537	0.000251	0.3186	3.41e-06	0.2147	0.00205	0.055
sarcoma	0.3205	1.01e-07	0.3291	4.38e-08	-0.1515	0.0137	0.3776	2.25e-10	0.2891	1.78e-06	0.1707	0.00542	0.3658	8.86e-10	0.418	1.37e-12	0.2297	0.000167	-0.1684	0.00611	0.3046	4.49e-07	-0.0876	0.156	0.4976	6.36e-18	0.0591	0.339	0.0278	0.653	-0.1887	0.00208	-0.1777	0.00378	-0.1631	0.00792	0.1711	0.00533	0.3809	1.54e-10	0.2155	0.000421	0.4889	2.85e-17	0.3997	1.5e-11	0.4207	9.51e-13	-0.0731
cervical & endocervical cancer	0.2004	0.000393	0.4338	1.31e-15	0.0582	0.308	0.3913	9.5e-13	0.3918	8.89e-13	0.1147	0.044	0.3649	3.66e-11	0.2419	1.72e-05	0.0419	0.464	0.0291	0.61	0.1687	0.00293	-0.1423	0.0123	0.4496	8.75e-17	-0.0691	0.226	-0.0036	0.95	-0.2182	0.00011	-0.0381	0.504	0.0671	0.239	0.1448	0.0108	0.2963	1.11e-07	0.2129	0.000163	0.4013	2.19e-13	0.3636	4.33e-11	0.2401	2e-05	0.1013
kidney papillary cell carcinoma	-0.0981	0.0792	0.3001	4.2e-08	0.048	0.392	0.1825	0.00102	0.057	0.308	0.111	0.047	0.2992	4.61e-08	0.1871	0.000757	-0.0651	0.245	-0.0823	0.141	-0.1095	0.0499	0.0274	0.625	0.017	0.762	-0.0275	0.623	0.0785	0.161	-0.146	0.00881	-0.1052	0.0598	0.0378	0.499	0.2951	7.2e-08	-0.1047	0.0609	0.0707	0.206	0.3372	5.64e-10	0.1743	0.00172	0.052	0.353	-0.156
colon adenocarcinoma	0.2073	0.000146	0.1499	0.00627	-0.0294	0.594	0.0394	0.474	-0.0314	0.57	0.0542	0.325	0.1642	0.00273	0.0519	0.347	-0.1833	0.000807	-0.0767	0.164	-0.0332	0.547	-0.1062	0.0536	0.1652	0.00257	-0.0271	0.623	0.0967	0.0788	-0.1012	0.066	0.0316	0.567	-0.044	0.425	0.004	0.942	-0.0275	0.618	-0.0419	0.447	0.0085	0.877	-0.0081	0.883	0.0882	0.109	-0.0939
liver hepatocellular carcinoma	0.2772	7.31e-09	0.4088	2.17e-18	0.2373	8.43e-07	0.2018	3.03e-05	0.0002	0.996	0.1172	0.0161	0.3987	1.7e-17	0.103	0.0345	0.0222	0.65	-0.0914	0.0609	0.139	0.00426	-0.0902	0.0644	0.2829	3.46e-09	-0.0124	0.799	-0.0344	0.482	-0.1713	0.000414	-0.2083	1.65e-05	0.0762	0.119	0.1342	0.00581	0.0855	0.0796	-0.0252	0.606	0.2656	3.15e-08	0.2812	4.32e-09	0.1635	0.000759	-0.0465
ovarian serous cystadenocarcinoma	0.0838	0.0846	0.3278	4.19e-12	-0.2771	6.24e-09	0.3931	3.74e-17	0.4185	1.88e-19	-0.0081	0.867	0.3007	2.48e-10	0.3687	3.97e-15	0.1017	0.0361	-0.0123	0.8	0.3238	7.84e-12	-0.0363	0.455	0.2295	1.74e-06	-0.0338	0.487	0.1912	7.3e-05	0.0412	0.397	-0.0411	0.398	-0.0184	0.706	0.0269	0.58	0.2166	6.64e-06	0.2517	1.45e-07	0.3665	5.89e-15	0.3809	3.98e-16	0.1769	0.000247	0.009
bladder urothelial carcinoma	0.038	0.434	0.317	2.14e-11	-0.088	0.0697	0.2484	2.07e-07	0.2724	1.11e-08	0.0213	0.662	0.176	0.000261	0.0739	0.128	-0.0958	0.0481	0.0717	0.14	0.301	2.27e-10	-0.1813	0.000168	0.1819	0.000161	-0.0349	0.472	0.1363	0.00483	0.0952	0.0497	0.0384	0.429	-0.1866	0.000107	-0.0206	0.671	0.3825	2.75e-16	0.1606	0.000881	0.3462	1.92e-13	0.2704	1.43e-08	0.1631	0.000726	0.2422
stomach adenocarcinoma	0.5092	4.65e-31	0.4042	4.07e-19	-0.1038	0.0278	0.0175	0.712	0.0163	0.73	0.2392	2.82e-07	0.2225	1.86e-06	0.1496	0.00146	-0.2903	3.48e-10	0.0149	0.752	0.0274	0.562	-0.0845	0.0732	0.0546	0.247	-0.1561	0.000891	0.1492	0.0015	-0.0873	0.0642	0.0141	0.766	0.1352	0.00405	0.178	0.000147	-0.208	8.59e-06	-0.2274	1.09e-06	0.0925	0.05	-0.0767	0.104	-0.0357	0.449	0.0105
skin cutaneous melanoma	0.0029	0.951	0.2111	3.89e-06	-0.0253	0.584	0.2193	1.59e-06	0.1833	6.41e-05	0.0734	0.112	0.2276	6.15e-07	0.2474	5.48e-08	0.0673	0.145	-0.1445	0.00169	0.2327	3.35e-07	0.1094	0.0176	0.1866	4.69e-05	0.057	0.218	-0.0378	0.414	-0.0001	0.999	0.0285	0.537	-0.1504	0.00108	0.1229	0.00762	0.0751	0.104	0.0477	0.302	0.2038	8.45e-06	0.1273	0.00573	0.0911	0.0483	0.0661
brain lower grade glioma	-0.0847	0.0528	0.3311	7.54e-15	-0.0671	0.125	0.3666	4.44e-18	0.2964	4.59e-12	-0.0565	0.197	0.395	5.65e-21	0.3977	2.89e-21	-0.0027	0.952	-0.0429	0.328	0.1259	0.00394	0.2361	4.65e-08	0.4068	2.89e-22	-0.2017	3.31e-06	0.0207	0.637	-0.1098	0.012	-0.0962	0.0278	0.0426	0.331	0.0903	0.0389	0.184	2.28e-05	-0.173	6.95e-05	0.2627	1.06e-09	0.408	2.15e-22	0.2832	4.22e-11	-0.1078
prostate adenocarcinoma	0.2863	8.49e-12	0.4647	1.04e-30	0.2014	2e-06	0.229	5.94e-08	0.3109	9.54e-14	0.1355	0.00148	0.3896	2.61e-21	0.3042	3.4e-13	0.0682	0.111	0.0585	0.171	0.3051	2.84e-13	0.15	0.000427	0.396	5.15e-22	-0.225	1.02e-07	0.1451	0.000658	-0.0473	0.269	0.1105	0.00963	0.2378	1.76e-08	0.074	0.0835	0.2297	5.4e-08	0.1445	0.000691	0.3295	2.43e-15	0.3232	8.56e-15	0.1782	2.73e-05	0.1437
lung squamous cell carcinoma	0.0979	0.022	0.1788	2.55e-05	-0.052	0.225	0.2124	5.2e-07	0.2645	3.16e-10	-0.0411	0.337	0.3115	8.49e-14	0.3003	7e-13	-0.0308	0.472	-0.0443	0.3	-0.1366	0.00135	-0.0498	0.244	0.2909	3.81e-12	-0.1871	1.04e-05	0.0447	0.297	-0.0077	0.858	-0.0044	0.918	0.0505	0.238	0.0437	0.308	0.1298	0.00233	-0.007	0.87	0.2378	1.76e-08	0.2574	9.67e-10	0.146	0.000608	-0.0587
head & neck squamous cell carcinoma	0.354	4.27e-18	0.3726	5.1e-20	0.1759	2.67e-05	0.3572	2.03e-18	0.4325	4.12e-27	0.1691	5.41e-05	0.2814	1e-11	-0.0809	0.0548	-0.0064	0.879	0.1182	0.00495	0.2829	7.66e-12	-0.2178	1.75e-07	0.4027	2.09e-23	0.1074	0.0107	0.1762	2.57e-05	-0.0155	0.713	0.1615	0.000117	-0.0019	0.963	0.2011	1.47e-06	0.3053	1.25e-13	0.1577	0.00017	0.4238	5.38e-26	0.3976	8.28e-23	0.3234	3.39e-15	0.3478
thyroid carcinoma	0.4562	1.08e-30	0.2963	4.9e-13	-0.2926	9.82e-13	0.3199	4.68e-15	0.1859	7.77e-06	0.3385	8.97e-17	0.3009	2.06e-13	0.0772	0.0654	-0.1655	7.09e-05	-0.0909	0.0299	0.1744	2.78e-05	-0.0155	0.712	0.2338	1.58e-08	-0.194	3.02e-06	0.2567	4.8e-10	0.2641	1.44e-10	-0.2251	5.4e-08	0.0112	0.789	0.1524	0.000257	-0.0833	0.0466	0.157	0.000165	0.343	3.32e-17	0.2916	1.18e-12	0.1165	0.00532	0.1694
lung adenocarcinoma	0.0009	0.982	0.2194	1.09e-07	0.0042	0.92	0.0657	0.116	0.1404	0.000741	0.0203	0.627	0.1568	0.000162	0.2452	2.63e-09	-0.1734	2.96e-05	-0.0656	0.117	0.2263	4.24e-08	-0.0171	0.682	0.0574	0.17	-0.1335	0.00135	0.1227	0.00323	-0.0082	0.845	0.0493	0.239	-0.0865	0.0382	0.0854	0.0408	0.2342	1.37e-08	0.1144	0.00606	0.1942	2.76e-06	0.2334	1.52e-08	0.0752	0.0717	0.0677
kidney clear cell carcinoma	-0.1048	0.01	-0.0034	0.933	0.0645	0.113	0.0519	0.204	0.0522	0.201	0.0307	0.452	0.114	0.00507	0.0813	0.0459	-0.0045	0.912	-0.0976	0.0165	-0.0486	0.234	-0.0855	0.0358	-0.0303	0.458	-0.0085	0.834	0.0412	0.312	-0.122	0.00269	-0.0963	0.018	0.04	0.326	0.136	0.00081	-0.046	0.259	-0.0142	0.728	0.0844	0.0384	0.1251	0.00208	-0.0599	0.142	-0.2321
breast invasive carcinoma	-0.0603	0.0358	0.1999	2.18e-12	-0.0276	0.336	-0.0043	0.88	0.1077	0.000173	-0.0206	0.473	0.2495	1.17e-18	0.0447	0.12	0.0416	0.148	-0.0916	0.00141	0.0872	0.00238	0.0947	0.000959	0.1274	8.58e-06	-0.0941	0.00104	0.0918	0.00138	-0.0224	0.436	-0.0218	0.448	-0.0649	0.024	-0.0219	0.446	0.0754	0.0086	-0.0248	0.388	0.1095	0.000134	0.1478	2.35e-07	0.073	0.0111	0.0376
[truncated: 1 more columns]

## Sheet: NTN4
	CDX2	CDX2	CEBPB	CEBPB	CTCF	CTCF	ESR2	ESR2	FOXA2	FOXA2	MBD3	MBD3	NANOG	NANOG	OTX2	OTX2	TFAP2C	TFAP2C	TP53	TP53	TP63	TP63	TP73	TP73	YY1	YY1	ZBTB7A	ZBTB7A	EZH2	EZH2	CHD8	CHD8	EED	EED	HDAC6	HDAC6	HDAC2	HDAC2
Diseases or Studies	Pearson coefficient r	p-value(two tail, t-test)	Pearson coefficient r	p-value(two tail, t-test)	Pearson coefficient r	p-value(two tail, t-test)	Pearson coefficient r	p-value(two tail, t-test)	Pearson coefficient r	p-value(two tail, t-test)	Pearson coefficient r	p-value(two tail, t-test)	Pearson coefficient r	p-value(two tail, t-test)	Pearson coefficient r	p-value(two tail, t-test)	Pearson coefficient r	p-value(two tail, t-test)	Pearson coefficient r	p-value(two tail, t-test)	Pearson coefficient r	p-value(two tail, t-test)	Pearson coefficient r	p-value(two tail, t-test)	Pearson coefficient r	p-value(two tail, t-test)	Pearson coefficient r	p-value(two tail, t-test)	Pearson coefficient r	p-value(two tail, t-test)	Pearson coefficient r	p-value(two tail, t-test)	Pearson coefficient r	p-value(two tail, t-test)	Pearson coefficient r	p-value(two tail, t-test)	Pearson coefficient r	p-value(two tail, t-test)
cholangiocarcinoma	-0.1353	0.376	0.0279	0.856	0.1987	0.191	-0.0051	0.973	0.2074	0.172	0.2418	0.11	-0.0839	0.584	0.2859	0.0569	0.1544	0.311	0.1519	0.319	-0.0255	0.868	0.3515	0.0179	0.1128	0.461	0.3831	0.00939	0.2736	0.0689	0.2383	0.115	0.2161	0.154	-0.4535	0.00176	0.2203	0.146
diffuse large B-cell lymphoma	0.1467	0.325	0.2114	0.154	0.4611	0.00111	-0.1879	0.206	0.3635	0.012	-0.4055	0.00469	0.0353	0.814	-0.1333	0.372	0.3148	0.0311	0.1561	0.295	0.19	0.201	-0.0968	0.518	0.469	0.000884	0.2739	0.0624	0.4547	0.00132	0.0693	0.643	0.2573	0.0808	-0.287	0.0505	0.2352	0.111
uterine carcinosarcoma	-0.0601	0.657	0.1138	0.399	0.0575	0.671	0.2098	0.117	-0.1608	0.232	-0.1345	0.319	0.0267	0.844	0.1098	0.416	0.5583	6.4e-06	-0.1273	0.345	0.2552	0.0553	0.2115	0.114	0.2019	0.132	0.2649	0.0464	0.0018	0.989	-0.169	0.209	-0.0478	0.724	-0.1493	0.268	-0.0407	0.764
adrenocortical cancer	0.0627	0.588	0.2192	0.0554	0.347	0.00199	0.1439	0.212	0.1905	0.0969	0.3581	0.00138	0.0666	0.565	0.2522	0.0269	0.271	0.0171	0.2404	0.0352	0.0736	0.524	0.3399	0.00249	0.4333	8.28e-05	0.357	0.00144	0.2568	0.0242	0.2508	0.0278	0.1511	0.19	0.0591	0.609	0.4324	8.61e-05
uveal melanoma	0.0728	0.524	-0.1221	0.284	0.3858	0.000446	0.1964	0.0828	0.0081	0.944	-0.2794	0.0126	0.2334	0.0385	-0.0402	0.725	0.2566	0.0225	-0.2837	0.0113	0.3857	0.000447	-0.2904	0.00943	0.5439	2.21e-07	0.0491	0.667	0.381	0.000532	-0.0245	0.83	0.4225	0.000105	-0.0673	0.556	0.5508	1.44e-07
mesothelioma	0.0703	0.517	0.0768	0.479	0.2441	0.0227	0.2458	0.0218	0.1952	0.0701	-0.3202	0.0025	-0.0066	0.951	0.1024	0.345	0.3606	0.000602	-0.1726	0.11	0.1596	0.14	-0.0394	0.717	0.401	0.000119	0.1146	0.291	-0.0912	0.401	-0.1106	0.308	-0.0656	0.546	-0.1865	0.0836	0.1075	0.322
kidney chromophobe	0.0564	0.595	-0.034	0.749	0.6359	1.26e-11	0.6733	2.64e-13	0.6213	4.99e-11	-0.0527	0.62	0.3427	0.000882	0.3485	0.000712	0.2994	0.00394	0.4768	1.77e-06	0.2965	0.00433	-0.0129	0.903	0.5444	2.43e-08	-0.1016	0.338	-0.0617	0.561	-0.0199	0.851	0.1071	0.312	0.5692	3.94e-09	0.6328	1.71e-11
rectum adenocarcinoma	0.1653	0.0952	-0.3477	0.000319	0.1012	0.309	0.3555	0.000229	0.1215	0.221	-0.3435	0.000382	0.0484	0.628	0.0221	0.825	0.1251	0.208	0.0732	0.463	0.3145	0.00122	-0.2404	0.0144	0.1377	0.166	0.045	0.651	-0.4025	2.51e-05	-0.1344	0.176	0.0143	0.886	-0.208	0.035	-0.0365	0.714
thymoma	-0.1786	0.05	0.0318	0.729	0.1229	0.179	-0.1127	0.218	-0.1607	0.0782	-0.368	3.29e-05	0.0863	0.347	-0.0588	0.522	0.1396	0.127	-0.259	0.00412	0.4767	3.25e-08	0.4542	1.67e-07	0.4812	2.31e-08	-0.0015	0.987	-0.3638	4.1e-05	-0.4431	3.59e-07	0.0846	0.356	-0.3718	2.68e-05	0.2047	0.0243
testicular germ cell tumor	0.5429	3.48e-13	-0.0152	0.852	0.3699	2.35e-06	-0.1512	0.0612	0.3779	1.35e-06	0.1325	0.101	-0.3572	5.44e-06	0.1682	0.037	-0.4678	9.55e-10	0.4101	1.28e-07	0.2975	0.000179	0.1418	0.0794	0.0818	0.313	-0.1335	0.0989	0.274	0.000585	-0.1467	0.0695	0.3124	8.02e-05	-0.3274	3.41e-05	0.3965	3.57e-07
glioblastoma multiforme	0.0622	0.419	-0.2248	0.00311	0.0735	0.34	-0.0951	0.216	-0.0363	0.637	-0.1002	0.192	0.002	0.979	0.0215	0.781	0.1548	0.0432	-0.3279	1.2e-05	-0.0253	0.742	0.0615	0.424	-0.1412	0.0655	0.0684	0.374	-0.1415	0.0649	-0.0563	0.465	-0.106	0.168	-0.0332	0.666	0.305	4.97e-05
pancreatic adenocarcinoma	0.3107	1.86e-05	0.0537	0.47	0.3746	1.74e-07	0.0701	0.346	0.0066	0.93	-0.2332	0.00149	0.1677	0.0233	0.0055	0.941	0.1972	0.00745	0.0939	0.206	0.2258	0.00211	0.0887	0.233	0.4259	1.85e-09	0.1894	0.0102	0.1792	0.0152	-0.161	0.0294	0.2663	0.000268	-0.1	0.178	0.2038	0.00566
pheochromocytoma & paraganglioma	0.057	0.441	0.2056	0.005	0.081	0.273	0.0584	0.429	0.0391	0.597	0.0465	0.529	-0.0617	0.404	0.0671	0.364	0.552	3.79e-16	0.1776	0.0156	0.3768	1.25e-07	-0.0414	0.576	0.0953	0.197	-0.135	0.0669	-0.0462	0.532	-0.0913	0.216	-0.1502	0.0412	-0.2364	0.00119	0.2485	0.00065
esophageal carcinoma	0.2151	0.00253	-0.1012	0.159	-0.2288	0.00129	0.226	0.00149	0.3462	7.16e-07	-0.2816	6.65e-05	0.0583	0.418	-0.0938	0.192	-0.3324	2.05e-06	-0.1841	0.00999	-0.3371	1.44e-06	-0.3633	1.79e-07	-0.2265	0.00146	-0.1494	0.0372	-0.2877	4.53e-05	-0.1771	0.0133	-0.0259	0.719	0.1204	0.0938	-0.2221	0.0018
uterine corpus endometrioid carcinoma	-0.1393	0.047	0.0862	0.22	0.3629	9.61e-08	0.4611	3.92e-12	-0.1944	0.00533	-0.4118	9.41e-10	0.0571	0.417	-0.1549	0.0269	0.046	0.513	0.0457	0.516	0.2456	0.000398	-0.0557	0.429	0.3942	5.43e-09	0.132	0.0599	-0.2434	0.000453	-0.2482	0.000345	0.1902	0.00643	-0.3039	9.96e-06	0.1313	0.0611
sarcoma	-0.1355	0.0277	0.2372	9.99e-05	0.1757	0.00418	0.097	0.116	-0.0342	0.58	0.0386	0.532	-0.1415	0.0215	-0.1032	0.0943	-0.0148	0.811	0.0009	0.989	0.1176	0.0563	-0.263	1.5e-05	-0.015	0.808	0.1575	0.0104	-0.2264	0.000208	-0.2052	0.000798	-0.1231	0.0456	-0.148	0.0161	-0.0264	0.67
cervical & endocervical cancer	-0.1053	0.0645	0.1556	0.00612	0.0288	0.614	0.071	0.213	0.045	0.431	-0.3052	4.4e-08	0.0325	0.569	-0.0628	0.271	-0.0027	0.962	-0.0448	0.433	-0.0832	0.144	-0.1229	0.0307	0.1991	0.000429	-0.0863	0.13	-0.2345	3.13e-05	-0.1691	0.00286	0.1437	0.0115	-0.1076	0.0588	-0.0031	0.957
kidney papillary cell carcinoma	0.025	0.655	-0.2126	0.000124	0.4359	2.54e-16	0.3081	1.74e-08	0.0807	0.149	-0.1389	0.0127	0.0062	0.912	0.0614	0.273	0.2905	1.16e-07	-0.0083	0.882	0.1894	0.000648	-0.2117	0.000133	0.4702	4.61e-19	0.296	6.49e-08	-0.1338	0.0164	-0.1651	0.003	0.0827	0.139	0.025	0.655	0.3576	4.09e-11
colon adenocarcinoma	0.0377	0.495	-0.2258	3.38e-05	-0.0385	0.485	0.219	5.89e-05	0.0243	0.66	-0.1507	0.00601	0.0608	0.27	0.1295	0.0185	0.0314	0.57	-0.1879	0.000591	0.225	3.62e-05	-0.219	5.86e-05	0.063	0.253	0.1061	0.0537	-0.3034	1.78e-08	-0.1543	0.0049	-0.1829	0.000831	-0.0506	0.359	-0.2569	2.18e-06
liver hepatocellular carcinoma	-0.0493	0.313	-0.033	0.499	0.3184	2.27e-11	0.1701	0.000456	0.037	0.449	-0.2916	1.07e-09	0.0174	0.722	-0.028	0.566	0.1672	0.000573	0.1418	0.00355	0.2345	1.14e-06	-0.0497	0.309	0.3452	3.17e-13	0.2808	4.58e-09	-0.117	0.0163	-0.2087	1.58e-05	0.0178	0.716	-0.074	0.13	0.0689	0.158
ovarian serous cystadenocarcinoma	0.0147	0.763	0.166	0.000589	-0.0258	0.595	0.2372	7.52e-07	-0.0727	0.134	-0.0654	0.179	0.0242	0.618	-0.1524	0.00162	0.4188	1.76e-19	-0.0662	0.173	0.0827	0.0885	0.0936	0.0537	0.08	0.0997	0.3222	1.01e-11	-0.1056	0.0295	-0.1441	0.0029	0.0365	0.453	0.0146	0.764	-0.2277	2.1e-06
bladder urothelial carcinoma	0.0054	0.912	0.0276	0.57	0.1236	0.0107	0.11	0.0232	-0.0904	0.0624	-0.2585	6.26e-08	0.0542	0.264	-0.1835	0.00014	0.1017	0.0358	-0.0297	0.541	0.1385	0.00419	0.0111	0.819	0.117	0.0157	0.1709	0.000395	-0.1552	0.00131	-0.0566	0.244	0.1173	0.0154	-0.023	0.636	0.0646	0.183
stomach adenocarcinoma	-0.1164	0.0135	0.0668	0.157	-0.154	0.00105	0.1111	0.0184	-0.0218	0.645	-0.2399	2.6e-07	0.1261	0.00739	0.0072	0.879	-0.006	0.898	-0.1448	0.00208	0.1543	0.00103	-0.2085	8.2e-06	-0.2135	4.91e-06	-0.064	0.175	-0.3897	9.04e-18	-0.128	0.00656	-0.1627	0.00053	-0.133	0.0047	-0.3954	2.7e-18
skin cutaneous melanoma	-0.0457	0.323	0.0245	0.597	0.2583	1.34e-08	-0.1481	0.00129	0.1324	0.00403	-0.1628	0.000396	0.1302	0.00469	0.1551	0.000743	0.3258	4.38e-13	0.1716	0.000186	0.2145	2.7e-06	0.0065	0.888	0.2801	6.4e-10	0.0387	0.402	-0.0151	0.744	-0.1256	0.00641	0.2535	2.51e-08	0.0352	0.447	0.2238	9.56e-07
brain lower grade glioma	0.0561	0.2	-0.177	4.7e-05	0.2833	4.17e-11	0.1117	0.0106	-0.235	5.42e-08	-0.1703	9.07e-05	-0.0567	0.196	-0.1809	3.17e-05	0.0436	0.319	-0.0544	0.214	-0.12	0.00599	-0.1055	0.0158	0.2097	1.31e-06	-0.0066	0.88	-0.0648	0.139	0.0715	0.103	-0.1539	0.000413	-0.1101	0.0117	0.2363	4.54e-08
lung squamous cell carcinoma	-0.1463	0.00059	0.3561	7.88e-18	0.3231	8.87e-15	0.2893	5.02e-12	0.5326	1.76e-41	-0.3873	4.68e-21	0.0503	0.24	-0.3065	2.2e-13	0.362	2.06e-18	0.0728	0.0885	0.8249	2.14e-137	0.561	9.6e-47	-0.3552	9.75e-18	0.3193	1.89e-14	-0.5947	1.04e-53	-0.262	4.73e-10	-0.2883	6.01e-12	-0.0415	0.332	-0.411	9.51e-24
prostate adenocarcinoma	0.12	0.00489	0.3324	1.34e-15	-0.1601	0.000168	-0.0841	0.0492	0.3257	5.24e-15	-0.2017	1.95e-06	0.0117	0.784	-0.1348	0.00156	-0.3207	1.41e-14	-0.0376	0.379	-0.4067	3.06e-23	-0.212	5.51e-07	0.1822	1.78e-05	0.0694	0.104	-0.3161	3.53e-14	-0.1585	0.000194	0.2176	2.7e-07	0.0116	0.786	0.2182	2.47e-07
head & neck squamous cell carcinoma	-0.031	0.462	-0.0829	0.049	0.2105	4.52e-07	0.0799	0.058	0.0704	0.0947	-0.1073	0.0108	0.0439	0.298	0.0806	0.0558	-0.0134	0.752	0.2575	5.38e-10	0.0323	0.444	0.111	0.00831	0.1214	0.00387	0.0554	0.189	-0.0639	0.13	-0.191	4.91e-06	-0.0383	0.364	0.0733	0.0822	0.0674	0.11
thyroid carcinoma	0.0796	0.0574	-0.0226	0.59	0.2608	2.48e-10	0.2589	3.37e-10	0.1809	1.37e-05	-0.3007	2.15e-13	-0.0174	0.679	-0.0428	0.307	0.1675	5.78e-05	0.123	0.00325	0.3572	1.25e-18	0.028	0.504	0.1841	9.52e-06	0.0578	0.168	0.1021	0.0146	-0.1526	0.000252	0.0563	0.179	-0.093	0.0263	0.2692	6.15e-11
lung adenocarcinoma	-0.1472	0.000403	0.028	0.504	-0.0233	0.578	-0.015	0.72	0.3067	5.77e-14	-0.0714	0.0872	0.1439	0.000544	-0.2573	3.91e-10	0.0912	0.0289	-0.0167	0.69	0.324	1.69e-15	0.1124	0.00703	-0.2309	2.21e-08	0.4098	1.19e-24	-0.4827	7.79e-35	-0.205	7.33e-07	-0.2735	2.64e-11	-0.0938	0.0246	-0.3116	2.15e-14
kidney clear cell carcinoma	-0.0565	0.166	-0.4743	3.81e-35	0.5446	7.09e-48	0.1071	0.00852	-0.1168	0.00409	-0.2064	3.17e-07	0.0378	0.354	0.0217	0.595	0.0755	0.0639	0.0267	0.513	0.0697	0.0871	-0.4078	1.43e-25	0.4481	4.02e-31	0.1607	7.38e-05	-0.3179	1.25e-15	0.0417	0.306	-0.0337	0.409	0.0108	0.792	0.4419	3.21e-30
breast invasive carcinoma	-0.219	1.25e-14	-0.1961	5.77e-12	0.0507	0.0778	0.1308	4.91e-06	-0.1897	2.77e-11	-0.1406	8.99e-07	0.0267	0.353	-0.1916	1.73e-11	0.0272	0.345	0.1136	7.33e-05	0.458	6.86e-64	0.1442	4.58e-07	0.0537	0.0616	0.2087	2.13e-13	-0.4355	2.87e-57	-0.0514	0.0736	-0.0214	0.456	-0.1454	3.73e-07	-0.2836	7.6e-24

## Sheet: NTN5
	AR	AR	KDM5A	KDM5A	SPDEF	SPDEF
Diseases or Studies	Pearson coefficient r	p-value(two tail, t-test)	Pearson coefficient r	p-value(two tail, t-test)	Pearson coefficient r	p-value(two tail, t-test)
cholangiocarcinoma	-0.0576	0.707	0.064	0.676	0.2387	0.114
diffuse large B-cell lymphoma	0.0881	0.556	-0.1135	0.448	-0.0017	0.991
uterine carcinosarcoma	-0.0686	0.612	-0.0496	0.714	-0.0476	0.725
adrenocortical cancer	-0.1082	0.349	0.1791	0.119	0.2747	0.0156
uveal melanoma	-0.0186	0.871	0.2436	0.0305	0.0285	0.803
mesothelioma	0.2973	0.00517	-0.0064	0.953	0.1555	0.15
kidney chromophobe	-0.1526	0.149	-0.1258	0.235	0.4585	4.88e-06
rectum adenocarcinoma	-0.0491	0.622	0.016	0.873	-0.0914	0.358
thymoma	-0.0201	0.827	-0.2938	0.00107	-0.2327	0.0102
testicular germ cell tumor	0.1774	0.0277	-0.0788	0.332	0.4181	6.85e-08
glioblastoma multiforme	0.1692	0.027	0.1537	0.0448	0.2925	0.000103
pancreatic adenocarcinoma	0.0004	0.995	-0.0531	0.475	-0.1971	0.00748
pheochromocytoma & paraganglioma	-0.0839	0.256	-0.0597	0.42	0.3939	2.9e-08
esophageal carcinoma	0.1837	0.0101	0.291	3.68e-05	-0.1586	0.0268
uterine corpus endometrioid carcinoma	0.398	3.75e-09	-0.1407	0.0447	0.2138	0.00213
sarcoma	-0.2836	2.83e-06	-0.0791	0.2	0.2669	1.1e-05
cervical & endocervical cancer	0.1022	0.0728	0.0292	0.609	-0.0521	0.361
kidney papillary cell carcinoma	0.1513	0.00661	-0.1362	0.0146	-0.0008	0.988
colon adenocarcinoma	0.1123	0.0412	-0.0348	0.528	-0.023	0.677
liver hepatocellular carcinoma	-0.0039	0.937	0.1353	0.00542	0.1371	0.00483
ovarian serous cystadenocarcinoma	0.1055	0.0296	0.0014	0.977	-0.0379	0.435
bladder urothelial carcinoma	0.1129	0.0198	-0.0738	0.128	0.0984	0.0425
stomach adenocarcinoma	0.2388	2.97e-07	0.219	2.73e-06	-0.1141	0.0154
skin cutaneous melanoma	0.0712	0.123	-0.0236	0.61	0.1567	0.000652
brain lower grade glioma	0.4821	8.61e-32	-0.0931	0.0333	0.232	7.99e-08
prostate adenocarcinoma	-0.2204	1.87e-07	-0.2502	2.87e-09	-0.0874	0.0408
lung squamous cell carcinoma	-0.084	0.0495	0.0682	0.111	0.0198	0.643
head & neck squamous cell carcinoma	0.07	0.0969	0.0049	0.908	0.0439	0.298
thyroid carcinoma	0.2445	3.23e-09	-0.3077	5.45e-14	0.0594	0.156
lung adenocarcinoma	0.0206	0.623	-0.0755	0.0708	-0.018	0.667
kidney clear cell carcinoma	-0.0189	0.644	-0.1227	0.00255	0.3166	1.67e-15
breast invasive carcinoma	0.037	0.198	-0.1616	1.54e-08	0.0854	0.00294

## Sheet: NTNG1
	CDX2	CDX2	CEBPB	CEBPB	ERG	ERG	FOS	FOS	GATA4	GATA4	HOXC9	HOXC9	MAFK	MAFK	MYOD1	MYOD1	NKX2-1	NKX2-1	RELA	RELA	SPDEF	SPDEF	TCF12	TCF12	TP53	TP53	YY1	YY1	EZH2	EZH2	CHD8	CHD8	RBBP5	RBBP5	SAP30	SAP30
Diseases or Studies	Pearson coefficient r	p-value(two tail, t-test)	Pearson coefficient r	p-value(two tail, t-test)	Pearson coefficient r	p-value(two tail, t-test)	Pearson coefficient r	p-value(two tail, t-test)	Pearson coefficient r	p-value(two tail, t-test)	Pearson coefficient r	p-value(two tail, t-test)	Pearson coefficient r	p-value(two tail, t-test)	Pearson coefficient r	p-value(two tail, t-test)	Pearson coefficient r	p-value(two tail, t-test)	Pearson coefficient r	p-value(two tail, t-test)	Pearson coefficient r	p-value(two tail, t-test)	Pearson coefficient r	p-value(two tail, t-test)	Pearson coefficient r	p-value(two tail, t-test)	Pearson coefficient r	p-value(two tail, t-test)	Pearson coefficient r	p-value(two tail, t-test)	Pearson coefficient r	p-value(two tail, t-test)	Pearson coefficient r	p-value(two tail, t-test)	Pearson coefficient r	p-value(two tail, t-test)
cholangiocarcinoma	0.1253	0.412	0.1205	0.43	0.3707	0.0122	-0.042	0.784	-0.255	0.0909	0.0832	0.587	0.0606	0.692	-0.1276	0.404	0.3171	0.0338	0.266	0.0774	0.1561	0.306	0.0332	0.829	0.0449	0.77	0.1572	0.302	0.2142	0.158	0.1479	0.332	0.0034	0.982	0.4781	0.000894
diffuse large B-cell lymphoma	-0.0205	0.891	-0.1134	0.448	-0.2957	0.0436	-0.0157	0.917	-0.1555	0.297	-0.0148	0.921	-0.3196	0.0285	-0.2265	0.126	0.101	0.5	-0.3929	0.0063	0.2838	0.0532	-0.2395	0.105	-0.1299	0.384	-0.2398	0.104	-0.1898	0.201	-0.2668	0.0698	-0.1424	0.34	0.1527	0.306
uterine carcinosarcoma	0.2404	0.0717	0.0684	0.613	0.2299	0.0854	0.3101	0.0189	0.2122	0.113	-0.0343	0.8	0.0491	0.717	-0.0249	0.854	0.2944	0.0262	-0.0388	0.774	0.4043	0.00182	0.3777	0.00377	0.0193	0.887	0.5709	3.53e-06	0.0104	0.939	-0.1423	0.291	0.1849	0.169	-0.1364	0.312
adrenocortical cancer	-0.0202	0.862	-0.0277	0.811	0.0364	0.754	0.036	0.756	-0.1089	0.346	-0.0276	0.811	-0.005	0.965	0.0151	0.897	0.1749	0.128	-0.0236	0.838	0.0975	0.399	-0.026	0.822	0.2058	0.0726	0.0241	0.835	0.0134	0.908	-0.0881	0.446	0.051	0.659	0.186	0.105
uveal melanoma	-0.135	0.235	-0.1133	0.32	0.003	0.979	-0.1592	0.161	0.4618	1.84e-05	-0.0794	0.487	0.1711	0.132	-0.1674	0.14	-0.0865	0.448	-0.0541	0.636	0.0533	0.641	-0.1287	0.258	-0.2079	0.0659	0.03	0.793	-0.173	0.127	-0.1031	0.366	0.1751	0.123	-0.2762	0.0137
mesothelioma	-0.1144	0.291	-0.0228	0.834	-0.2824	0.00805	0.0557	0.608	0.0118	0.914	-0.2698	0.0115	0.2146	0.0459	-0.251	0.019	-0.2201	0.0405	0.1143	0.292	0.072	0.508	0.0886	0.414	-0.0185	0.865	0.3286	0.00189	-0.1041	0.337	0.0151	0.89	0.0267	0.806	-0.215	0.0455
kidney chromophobe	-0.0874	0.41	0.1678	0.112	0.2511	0.0164	0.2765	0.00799	-0.1051	0.321	-0.0098	0.926	-0.1243	0.24	0.0703	0.508	0.2022	0.0546	-0.0828	0.435	-0.191	0.0698	0.2149	0.0408	0.1291	0.222	0.3041	0.00338	0.2381	0.023	0.0358	0.736	0.2424	0.0206	0.3093	0.00285
rectum adenocarcinoma	-0.1875	0.0578	-0.3431	0.000388	0.4936	1.18e-07	0.3274	0.000737	-0.1538	0.121	0.1737	0.0794	0.1258	0.205	0.2501	0.0108	-0.1306	0.189	-0.0174	0.861	0.1826	0.0649	0.0849	0.394	-0.1302	0.19	-0.1143	0.25	-0.492	1.3e-07	-0.0784	0.431	-0.1922	0.0518	-0.0528	0.596
thymoma	-0.0982	0.284	-0.1574	0.0847	0.2779	0.00203	0.2275	0.0121	0.1282	0.161	-0.0464	0.613	-0.0526	0.566	-0.0595	0.517	0.0684	0.456	-0.0292	0.75	-0.0254	0.782	0.1151	0.209	-0.0694	0.449	0.1716	0.0599	-0.164	0.0723	-0.191	0.0358	0.2774	0.00207	-0.1266	0.166
testicular germ cell tumor	-0.1734	0.0315	-0.0655	0.42	0.0785	0.333	0.1165	0.15	-0.1996	0.0131	-0.0656	0.419	0.0258	0.75	0.2423	0.00247	-0.1985	0.0136	-0.0331	0.684	-0.0326	0.689	0.136	0.0927	0.1585	0.0497	0.2461	0.00209	0.0077	0.924	0.086	0.289	0.1283	0.113	0.3213	4.84e-05
glioblastoma multiforme	0.0636	0.408	0.0674	0.381	0.1495	0.051	0.1088	0.156	0.071	0.356	0.0729	0.344	0.2292	0.00256	-0.0996	0.195	0.1088	0.156	-0.0875	0.255	-0.1158	0.132	-0.2655	0.000449	0.0072	0.925	-0.0623	0.418	-0.0916	0.233	0.0799	0.299	-0.0493	0.522	-0.0854	0.267
pancreatic adenocarcinoma	-0.2456	0.000805	0.1287	0.0826	0.5264	1.96e-14	0.1886	0.0106	-0.03	0.687	-0.0405	0.586	-0.1032	0.164	0.0866	0.244	0.1442	0.0514	0.0267	0.719	-0.0273	0.713	0.3166	1.27e-05	0.2137	0.00368	0.1402	0.0584	-0.0668	0.369	0.0163	0.827	0.1169	0.115	0.0175	0.814
pheochromocytoma & paraganglioma	-0.0911	0.217	-0.1731	0.0184	0.01	0.893	0.1759	0.0166	-0.1579	0.0318	0.0556	0.452	-0.1945	0.00799	-0.0512	0.489	-0.0334	0.652	-0.2723	0.000177	0.1455	0.0481	0.0191	0.797	-0.0993	0.179	0.1395	0.0582	-0.0285	0.7	-0.0579	0.434	0.2078	0.00454	0.2931	5.14e-05
esophageal carcinoma	-0.3008	1.94e-05	0.2117	0.00297	0.1444	0.0439	0.1354	0.0591	-0.1621	0.0236	-0.0502	0.486	-0.1315	0.0668	0.1321	0.0657	0.1063	0.139	-0.0308	0.669	-0.1854	0.00948	0.0241	0.738	0.0227	0.752	0.0345	0.632	-0.1661	0.0203	0.1017	0.157	0.0575	0.425	0.1375	0.0552
uterine corpus endometrioid carcinoma	-0.0283	0.688	-0.0792	0.26	0.1946	0.00528	0.1681	0.0162	0.0924	0.189	-0.0421	0.55	-0.0011	0.988	0.1915	0.00608	0.1385	0.0481	-0.0733	0.297	-0.2599	0.000174	0.3994	3.26e-09	0.0395	0.575	0.2464	0.000382	0.0128	0.856	-0.0227	0.748	0.3005	1.26e-05	-0.1134	0.106
sarcoma	0.0553	0.371	-0.0911	0.14	0.0373	0.546	-0.0039	0.95	0.0045	0.942	-0.0595	0.336	-0.1421	0.021	0.0313	0.612	0.0666	0.281	0.0315	0.61	0.0663	0.283	0.132	0.032	-0.0544	0.378	0.0744	0.228	-0.018	0.77	-0.0667	0.28	-0.0147	0.813	0.007	0.909
cervical & endocervical cancer	0.0292	0.609	-0.0503	0.378	0.2091	0.000214	0.0562	0.325	0.1092	0.0552	-0.0372	0.515	-0.0422	0.46	0.0967	0.0896	0.2069	0.000251	-0.0073	0.898	0.0942	0.0983	0.1766	0.00183	0.0105	0.854	0.1439	0.0113	-0.1043	0.067	0.0473	0.407	0.0753	0.187	-0.0768	0.178
kidney papillary cell carcinoma	-0.0404	0.471	-0.0911	0.103	0.2903	1.19e-07	0.2746	5.85e-07	-0.0843	0.132	0.0483	0.388	0.3714	6.16e-12	-0.1489	0.00752	0.125	0.0251	0.2291	3.41e-05	-0.0819	0.143	0.1893	0.000654	-0.0804	0.151	0.1054	0.0592	-0.1588	0.00435	-0.0172	0.759	0.12	0.0317	-0.1672	0.00266
colon adenocarcinoma	-0.097	0.0779	-0.1414	0.01	0.5387	2.66e-26	0.0911	0.0981	0.0095	0.864	0.1095	0.0464	-0.028	0.612	0.1887	0.000559	0.0095	0.863	-0.1059	0.0543	-0.0315	0.568	-0.0373	0.499	-0.1328	0.0156	-0.1728	0.0016	-0.478	2.67e-20	-0.1895	0.00053	-0.0869	0.115	-0.2018	0.00022
liver hepatocellular carcinoma	0.0652	0.182	-0.1256	0.00987	0.0801	0.101	0.1625	0.000819	0.0629	0.198	0.1957	5.27e-05	0.0731	0.134	0.2594	6.72e-08	0.2462	3.14e-07	0.1567	0.00126	0.1022	0.0361	0.1871	0.000112	0.1718	0.000397	0.1055	0.0305	0.1331	0.00623	0.2047	2.3e-05	0.0693	0.156	0.166	0.000629
ovarian serous cystadenocarcinoma	-0.1774	0.000237	-0.0985	0.0425	0.0974	0.0448	0.1659	0.000594	-0.0358	0.461	-0.0097	0.841	0.1005	0.0383	0.0599	0.218	0.0535	0.271	-0.0819	0.0917	-0.232	1.33e-06	0.1966	4.5e-05	0.0449	0.356	-0.0615	0.206	-0.041	0.4	-0.0015	0.976	0.0725	0.135	0.0056	0.909
bladder urothelial carcinoma	-0.106	0.0287	0.0474	0.329	0.3794	4.92e-16	0.0986	0.0419	0.118	0.0149	-0.059	0.224	-0.0626	0.197	0.0323	0.507	-0.0368	0.449	0.0328	0.5	-0.058	0.232	0.2878	1.44e-09	-0.027	0.578	-0.0616	0.205	-0.1478	0.00223	-0.1403	0.0037	0.1049	0.0304	0.264	3.18e-08
stomach adenocarcinoma	-0.1834	9.15e-05	-0.0052	0.912	0.4564	1.57e-24	0.1491	0.00152	-0.1101	0.0194	-0.1928	3.85e-05	-0.028	0.554	0.1992	2.08e-05	0.1202	0.0107	0.0027	0.954	-0.1394	0.00305	0.1091	0.0207	-0.087	0.0651	-0.2363	3.97e-07	-0.4034	4.92e-19	0.0215	0.649	-0.1479	0.00165	0.0639	0.176
skin cutaneous melanoma	-0.0188	0.684	0.0315	0.496	0.1573	0.000618	0.1279	0.00549	-0.0721	0.119	-0.0845	0.0672	-0.0176	0.703	0.0911	0.0483	0.0952	0.0392	0.0496	0.284	0.1442	0.00173	0.1936	2.38e-05	-0.0524	0.256	0.2003	1.21e-05	-0.0048	0.918	0.1505	0.00107	0.1501	0.0011	0.0114	0.805
brain lower grade glioma	-0.004	0.928	0.1451	0.000876	-0.0354	0.419	0.0907	0.0381	0.1365	0.00175	0.2132	8.58e-07	0.32	6.49e-14	-0.1443	0.000938	0.1815	2.98e-05	-0.4144	4.07e-23	0.2667	5.75e-10	-0.4069	2.8e-22	-0.1843	2.22e-05	0.0733	0.094	-0.0422	0.335	-0.3894	2.21e-20	0.1407	0.00126	-0.1354	0.00192
prostate adenocarcinoma	-0.1023	0.0166	0.3076	1.79e-13	0.4909	1.42e-34	0.3191	1.94e-14	0.1531	0.000322	-0.2313	4.34e-08	0.1545	0.000283	-0.1715	5.47e-05	0.4613	3.14e-30	0.1081	0.0114	0.3269	4.09e-15	0.2026	1.73e-06	-0.1289	0.00249	-0.3338	9.89e-16	-0.5447	1.19e-43	0.066	0.123	-0.1679	7.87e-05	-0.0842	0.0487
lung squamous cell carcinoma	-0.0793	0.0637	0.0579	0.176	-0.0997	0.0196	0.0538	0.208	-0.0751	0.0792	0.0064	0.881	-0.0238	0.579	-0.0045	0.917	-0.1755	3.6e-05	0.0608	0.155	-0.0552	0.197	0.1112	0.00919	-0.0349	0.415	0.1227	0.00401	-0.0334	0.435	-0.059	0.168	0.1147	0.00721	0.0668	0.118
head & neck squamous cell carcinoma	0.0448	0.288	0.0355	0.401	0.1823	1.32e-05	0.0668	0.113	0.1006	0.0168	0.0707	0.0935	-0.0557	0.187	0.0523	0.215	0.0891	0.0344	0.086	0.0412	0.1423	0.000703	0.234	1.89e-08	0.1323	0.00164	-0.0017	0.969	-0.092	0.0289	-0.0344	0.414	0.0389	0.357	0.1497	0.000359
thyroid carcinoma	0.1388	0.000884	0.1469	0.00043	0.0973	0.0201	0.1321	0.00156	0.2918	1.14e-12	-0.0097	0.817	0.0431	0.304	0.0905	0.0306	-0.2411	5.36e-09	0.1214	0.00366	-0.0552	0.188	0.2504	1.31e-09	0.1383	0.000918	-0.0614	0.143	0.199	1.65e-06	-0.0763	0.0686	0.1387	0.000893	0.0003	0.995
lung adenocarcinoma	-0.1787	1.66e-05	-0.0362	0.386	0.5302	6.24e-43	0.2923	9.12e-13	0.1439	0.000546	-0.214	2.26e-07	-0.0811	0.0523	-0.0123	0.768	0.0547	0.19	-0.1082	0.0095	-0.1754	2.37e-05	0.1184	0.00449	-0.0278	0.507	-0.1904	4.33e-06	-0.4018	1.11e-23	-0.1141	0.00622	-0.1555	0.000184	-0.1375	0.00096
kidney clear cell carcinoma	0.0537	0.188	-0.1152	0.00461	-0.1421	0.000465	0.0742	0.0686	0.0818	0.0446	0.0234	0.566	-0.124	0.00229	-0.0867	0.0333	0.139	0.00062	-0.2394	2.64e-09	-0.1598	8.1e-05	0.111	0.00634	-0.2102	1.91e-07	-0.0252	0.537	-0.3614	4.87e-20	-0.0296	0.467	0.221	4.2e-08	-0.5582	1.08e-50
breast invasive carcinoma	0.0367	0.202	0.0379	0.188	0.1844	9.88e-11	0.1219	2.08e-05	-0.0787	0.0061	0.0952	0.00091	-0.0207	0.471	0.004	0.89	0.0139	0.628	-0.0121	0.673	-0.011	0.702	0.1088	0.000148	0.0381	0.184	0.0558	0.0522	-0.041	0.153	-0.0344	0.231	0.0867	0.00252	0.0605	0.0351

## Sheet: NTNG2
	CEBPB	CEBPB	ERG	ERG	ETS1	ETS1	GABPA	GABPA	GATA1	GATA1	GATA2	GATA2	GATA3	GATA3	KDM5A	KDM5A	KDM5B	KDM5B	MYC	MYC	OTX2	OTX2	RUNX3	RUNX3	SPDEF	SPDEF	SPI1	SPI1	TCF4	TCF4	VDR	VDR	YY1	YY1	ZNF552	ZNF552	SAP30	SAP30	EZH2	EZH2	HDAC1	HDAC1	HDAC6	HDAC6	HDAC2	HDAC2	RBBP5	RBBP5
Diseases or Studies	Pearson coefficient r	p-value(two tail, t-test)	Pearson coefficient r	p-value(two tail, t-test)	Pearson coefficient r	p-value(two tail, t-test)	Pearson coefficient r	p-value(two tail, t-test)	Pearson coefficient r	p-value(two tail, t-test)	Pearson coefficient r	p-value(two tail, t-test)	Pearson coefficient r	p-value(two tail, t-test)	Pearson coefficient r	p-value(two tail, t-test)	Pearson coefficient r	p-value(two tail, t-test)	Pearson coefficient r	p-value(two tail, t-test)	Pearson coefficient r	p-value(two tail, t-test)	Pearson coefficient r	p-value(two tail, t-test)	Pearson coefficient r	p-value(two tail, t-test)	Pearson coefficient r	p-value(two tail, t-test)	Pearson coefficient r	p-value(two tail, t-test)	Pearson coefficient r	p-value(two tail, t-test)	Pearson coefficient r	p-value(two tail, t-test)	Pearson coefficient r	p-value(two tail, t-test)	Pearson coefficient r	p-value(two tail, t-test)	Pearson coefficient r	p-value(two tail, t-test)	Pearson coefficient r	p-value(two tail, t-test)	Pearson coefficient r	p-value(two tail, t-test)	Pearson coefficient r	p-value(two tail, t-test)	Pearson coefficient r	p-value(two tail, t-test)
cholangiocarcinoma	-0.1076	0.482	0.3294	0.0271	0.5178	0.00027	0.3814	0.00974	0.2024	0.182	0.3656	0.0135	0.556	7.32e-05	0.3247	0.0295	0.4056	0.0057	0.2952	0.049	0.0907	0.554	0.6642	6.55e-07	0.4899	0.000636	0.598	1.44e-05	0.6471	1.56e-06	0.4499	0.00193	0.1744	0.252	0.4067	0.00557	0.4361	0.00275	0.5815	2.8e-05	0.7286	1.4e-08	-0.1211	0.428	0.6251	4.42e-06	0.3359	0.0241
diffuse large B-cell lymphoma	0.2289	0.122	0.41	0.00421	0.2948	0.0443	0.0865	0.563	0.0323	0.829	0.2563	0.0821	0.7927	3.14e-11	0.3653	0.0116	0.3953	0.00596	0.0385	0.797	0.1061	0.478	0.4906	0.000464	-0.2829	0.054	0.3973	0.00568	0.2577	0.0804	0.3406	0.0191	0.2767	0.0598	0.3151	0.031	-0.1216	0.416	0.1913	0.198	-0.2062	0.164	-0.0493	0.742	0.0245	0.87	0.2678	0.0688
uterine carcinosarcoma	-0.033	0.807	0.4372	0.000672	0.0804	0.552	0.1329	0.324	0.2712	0.0413	0.1029	0.446	0.004	0.976	-0.1318	0.328	0.014	0.918	-0.305	0.021	0.0152	0.911	0.2364	0.0766	0.161	0.232	0.2058	0.125	0.1116	0.409	0.3455	0.00847	-0.1514	0.261	0.1293	0.338	-0.0245	0.857	0.0298	0.826	-0.1298	0.336	0.3402	0.00961	-0.0865	0.523	0.0635	0.639
adrenocortical cancer	-0.06	0.604	-0.1291	0.263	-0.2385	0.0367	0.2299	0.0442	-0.2842	0.0122	0.217	0.058	0.4884	6.59e-06	0.1969	0.086	0.4198	0.000144	0.3271	0.00369	0.1335	0.247	-0.1871	0.103	0.1333	0.248	-0.3811	0.000628	-0.0357	0.758	0.1352	0.241	0.2009	0.0798	0.2851	0.012	0.2331	0.0413	0.2853	0.0119	0.0785	0.497	0.0902	0.435	0.3064	0.00672	0.0817	0.48
uveal melanoma	0.5487	1.64e-07	0.3126	0.00504	0.0125	0.913	0.1621	0.153	0.159	0.162	0.4174	0.00013	0.4322	6.96e-05	0.2417	0.0319	-0.0843	0.46	-0.0264	0.818	0.5805	2.05e-08	0.1616	0.155	-0.2199	0.0515	0.5421	2.47e-07	0.5471	1.82e-07	0.357	0.00124	0.1798	0.113	-0.0408	0.721	0.625	7.41e-10	0.3905	0.000374	0.1364	0.231	-0.1438	0.206	0.0803	0.482	0.2989	0.00745
mesothelioma	-0.0082	0.94	0.4894	1.5e-06	0.4177	5.7e-05	-0.0776	0.475	0.007	0.949	0.4433	1.71e-05	0.0994	0.36	0.0694	0.523	-0.218	0.0425	0.0688	0.526	0.2424	0.0237	0.2775	0.00927	0.3492	0.000915	0.2583	0.0157	0.2958	0.0054	0.3438	0.00111	0.0296	0.786	-0.159	0.141	0.2133	0.0473	-0.0034	0.975	0.34	0.00127	-0.023	0.833	0.0753	0.488	-0.3411	0.00122
kidney chromophobe	0.1879	0.0745	0.1081	0.308	0.0871	0.412	0.0682	0.521	-0.0595	0.575	-0.0589	0.579	0.0482	0.65	-0.024	0.821	-0.0061	0.954	0.216	0.0397	0.0051	0.962	0.2912	0.00511	0.0542	0.61	0.2387	0.0227	0.0384	0.717	-0.1793	0.0891	-0.1263	0.233	-0.13	0.219	0.2586	0.0133	0.0489	0.646	0.1093	0.302	0.1214	0.252	0.0178	0.867	0.0294	0.782
rectum adenocarcinoma	0.2423	0.0137	0.4828	2.4e-07	0.4062	2.07e-05	0.0472	0.636	0.3257	0.000788	0.1734	0.0798	0.4088	1.81e-05	0.0581	0.56	0.0332	0.739	-0.0057	0.954	-0.1952	0.0482	0.3408	0.000427	-0.21	0.0332	0.6349	5.96e-13	0.5489	1.93e-09	-0.118	0.235	-0.0113	0.91	-0.2319	0.0184	0.0385	0.699	-0.0302	0.762	-0.1536	0.121	0.0827	0.406	-0.0366	0.714	-0.0234	0.815
thymoma	0.2369	0.00889	0.1461	0.11	-0.0642	0.484	-0.1047	0.253	-0.0027	0.977	0.0632	0.491	-0.1277	0.163	-0.065	0.479	-0.0954	0.298	-0.0021	0.982	0.1598	0.08	0.3119	0.000496	0.1187	0.195	0.261	0.00384	0.0119	0.897	0.1536	0.0927	-0.1268	0.166	0.0022	0.981	-0.0013	0.989	-0.0463	0.614	-0.2545	0.00484	0.0502	0.585	-0.2129	0.0191	-0.1271	0.165
testicular germ cell tumor	0.0817	0.314	0.4323	2.16e-08	0.3184	5.71e-05	-0.0722	0.373	0.2151	0.00738	0.2146	0.00754	0.0396	0.626	-0.0749	0.356	-0.1326	0.101	0.2195	0.00623	-0.1102	0.174	0.1957	0.015	0.2651	0.00089	0.1468	0.0693	0.5277	2.03e-12	0.3175	6.01e-05	-0.2256	0.0049	-0.4171	7.42e-08	0.2613	0.00106	-0.1456	0.0716	-0.2097	0.00905	0.2779	0.000484	-0.0927	0.253	-0.1984	0.0137
glioblastoma multiforme	-0.3102	3.64e-05	0.0573	0.456	0.1059	0.168	-0.2543	0.000789	0.0314	0.684	0.1228	0.11	-0.3182	2.22e-05	-0.1427	0.0626	0.1192	0.121	-0.0555	0.471	-0.0418	0.587	-0.2629	0.000514	0.3217	1.78e-05	-0.1301	0.0898	0.2115	0.00549	-0.2288	0.00261	-0.1498	0.0505	-0.1223	0.111	-0.2172	0.00433	-0.1907	0.0125	-0.4258	6.38e-09	0.2223	0.00348	0.0636	0.408	-0.0839	0.275
pancreatic adenocarcinoma	0.2272	0.00198	0.4038	1.44e-08	0.4199	3.26e-09	0.2526	0.000561	0.3625	4.6e-07	0.3072	2.33e-05	0.283	0.000104	-0.0557	0.454	0.0402	0.589	0.0638	0.391	-0.0905	0.223	0.3911	4.4e-08	-0.1861	0.0117	0.5403	2.91e-15	0.4535	1.15e-10	0.215	0.00347	0.0039	0.958	0.0614	0.409	0.2286	0.00186	-0.0988	0.183	-0.07	0.346	0.3315	4.55e-06	0.0783	0.292	-0.021	0.778
pheochromocytoma & paraganglioma	0.0903	0.222	0.4271	1.33e-09	0.4218	2.24e-09	0.0185	0.802	0.2274	0.00186	-0.135	0.0669	-0.1123	0.128	-0.1516	0.0394	0.1116	0.131	0.0669	0.366	0.247	0.000702	0.1112	0.132	0.1918	0.00892	0.0821	0.266	-0.0893	0.227	0.0203	0.784	-0.1868	0.0109	-0.0517	0.484	-0.0648	0.381	0.1213	0.1	0.3211	8.35e-06	0.0189	0.799	0.1851	0.0117	-0.3201	8.94e-06
esophageal carcinoma	0.3335	1.9e-06	0.3172	6.25e-06	0.3899	1.76e-08	0.2397	0.00074	0.3433	8.95e-07	0.2164	0.00238	0.2195	0.00205	0.1521	0.0338	0.0263	0.715	0.002	0.978	0.1254	0.0806	0.3317	2.17e-06	-0.203	0.00442	0.5833	3.6e-19	0.5513	6.72e-17	-0.1874	0.00872	0.1221	0.0891	-0.1457	0.0421	0.0993	0.167	0.0786	0.275	-0.0983	0.172	0.0556	0.44	0.0499	0.489	0.0501	0.486
uterine corpus endometrioid carcinoma	-0.0238	0.736	0.0787	0.263	0.0942	0.18	-0.0046	0.948	0.0713	0.311	0.2068	0.003	0.3189	3.33e-06	-0.037	0.6	0.0017	0.981	-0.0758	0.282	0.0223	0.752	0.1596	0.0226	-0.1096	0.119	0.2104	0.00252	0.223	0.00134	0.0123	0.861	-0.1728	0.0135	-0.1431	0.0412	0.0249	0.724	0.0089	0.9	-0.1264	0.0717	0.1165	0.0971	-0.0573	0.416	-0.0019	0.978
sarcoma	0.0319	0.605	-0.0116	0.851	-0.1101	0.0741	-0.0539	0.383	0.0995	0.107	0.1867	0.00232	0.1576	0.0104	-0.0898	0.146	0.0135	0.827	-0.0518	0.402	0.127	0.0392	0.2157	0.000415	0.0279	0.652	-0.0244	0.693	0.1028	0.0955	-0.0902	0.144	-0.0532	0.389	0.1188	0.0538	-0.1536	0.0125	-0.1522	0.0133	-0.0115	0.853	0.0866	0.161	-0.1928	0.00165	-0.1064	0.0844
cervical & endocervical cancer	-0.0156	0.785	0.1125	0.0482	0.2456	1.26e-05	0.0213	0.709	0.1934	0.000629	0.1018	0.0739	0.0776	0.174	0.0102	0.858	-0.0775	0.174	-0.0143	0.803	0.1293	0.023	0.0825	0.148	-0.1518	0.00752	0.4379	6.59e-16	0.3074	3.46e-08	-0.1381	0.0151	-0.0806	0.157	-0.0704	0.217	0.0804	0.159	-0.0532	0.352	-0.126	0.0268	0.0267	0.64	0.0416	0.466	-0.0706	0.216
kidney papillary cell carcinoma	0.3043	2.65e-08	0.1635	0.0033	0.2243	5.02e-05	0.098	0.0795	0.1895	0.000642	0.1907	0.000591	0.1764	0.00151	0.0908	0.104	0.15	0.0071	0.1255	0.0246	-0.0157	0.779	0.3483	1.39e-10	0.1167	0.0366	0.2074	0.000182	0.2383	1.59e-05	-0.0256	0.647	-0.0168	0.764	-0.0157	0.779	0.2335	2.37e-05	0.1297	0.0201	0.0568	0.31	-0.1202	0.0314	0.0588	0.293	-0.0472	0.399
colon adenocarcinoma	0.2624	1.3e-06	0.5634	4.04e-29	0.5409	1.52e-26	0.0469	0.395	0.1676	0.00222	0.2738	4.21e-07	0.3924	1.25e-13	0.2516	3.57e-06	0.1415	0.00994	0.0075	0.892	0.0117	0.831	0.4953	6.82e-22	-0.0968	0.0787	0.5632	4.34e-29	0.6245	3.43e-37	-0.1634	0.00287	-0.0275	0.618	-0.1463	0.00767	0.0369	0.503	-0.0468	0.396	-0.277	3.05e-07	0.0645	0.242	-0.0456	0.409	0.0405	0.463
liver hepatocellular carcinoma	-0.0374	0.445	0.1898	8.9e-05	0.3476	2.12e-13	0.0914	0.061	0.0999	0.0404	0.3086	9.76e-11	0.4325	1.29e-20	0.1293	0.00788	0.1951	5.56e-05	0.1515	0.00182	0.1114	0.0222	0.4916	5.34e-27	0.2386	7.33e-07	0.5332	2.68e-32	0.3368	1.27e-12	0.3127	5.3e-11	0.1187	0.0148	0.1165	0.0168	0.2123	1.11e-05	0.2336	1.26e-06	0.2745	1.03e-08	-0.2488	2.34e-07	0.2895	1.42e-09	0.0798	0.102
ovarian serous cystadenocarcinoma	0.1915	7.07e-05	0.2037	2.32e-05	0.1708	0.000404	0.0202	0.678	0.0412	0.397	0.0821	0.091	0.1452	0.00269	-0.0364	0.454	-0.1087	0.025	0.0079	0.871	-0.0168	0.729	0.1781	0.000224	0.1367	0.00476	0.2771	6.23e-09	0.056	0.249	0.1961	4.69e-05	0.0884	0.0686	0.0938	0.0534	0.0925	0.0568	0.109	0.0246	-0.0237	0.626	0.0394	0.418	-0.0866	0.0744	-0.0451	0.354
bladder urothelial carcinoma	0.2595	5.5e-08	0.368	4.16e-15	0.4068	2.08e-18	-0.1961	4.61e-05	0.413	5.56e-19	-0.1585	0.00103	-0.2187	5.21e-06	-0.0641	0.187	-0.2968	4.12e-10	0.0992	0.0408	-0.0281	0.563	0.5073	3.07e-29	-0.1883	9.2e-05	0.6405	1.45e-50	0.5803	1.06e-39	0.1131	0.0196	-0.2512	1.48e-07	-0.2884	1.33e-09	0.2541	1.06e-07	-0.0742	0.126	-0.3456	2.15e-13	-0.0359	0.459	-0.2436	3.57e-07	-0.0956	0.0486
stomach adenocarcinoma	0.3809	5.53e-17	0.3827	3.85e-17	0.4481	1.29e-23	0.0445	0.346	0.2092	7.68e-06	0.2923	2.57e-10	0.3824	4.08e-17	0.0311	0.511	-0.1454	0.00199	-0.0594	0.208	-0.0056	0.905	0.329	8.05e-13	-0.0462	0.328	0.4757	8.61e-27	0.479	3.49e-27	-0.0948	0.0445	-0.1269	0.00704	-0.1139	0.0156	0.0759	0.108	-0.1493	0.00149	-0.1318	0.00511	0.1179	0.0123	-0.0612	0.195	-0.0507	0.283
skin cutaneous melanoma	0.2647	5.66e-09	0.1854	5.25e-05	0.1184	0.0102	-0.0802	0.0824	0.1634	0.000375	0.2701	2.67e-09	0.4886	1.42e-29	-0.0678	0.142	-0.2797	6.79e-10	-0.2329	3.3e-07	-0.0927	0.0446	0.2076	5.67e-06	0.0218	0.638	0.5364	2.26e-36	0.206	6.71e-06	0.285	3.13e-10	-0.0802	0.0823	-0.0683	0.139	-0.005	0.913	-0.008	0.863	0.0845	0.0671	0.1146	0.0129	-0.1564	0.000666	-0.1549	0.000753
brain lower grade glioma	-0.2824	4.83e-11	-0.1665	0.000131	0.0842	0.0544	-0.075	0.0867	0.2074	1.72e-06	0.2072	1.76e-06	-0.369	2.56e-18	-0.2519	5.2e-09	0.178	4.25e-05	0.3648	6.6e-18	-0.3313	7.3e-15	-0.3917	1.28e-20	0.0822	0.0602	-0.2944	6.45e-12	0.1558	0.000348	-0.4487	2.81e-27	-0.2008	3.7e-06	-0.3022	1.65e-12	-0.1326	0.00238	-0.109	0.0126	-0.4146	3.87e-23	0.1554	0.00036	0.1171	0.00736	-0.216	6.15e-07
prostate adenocarcinoma	0.1799	2.26e-05	-0.2407	1.16e-08	0.4003	1.65e-22	0.089	0.0374	0.2515	2.36e-09	0.269	1.54e-10	0.226	8.86e-08	-0.0456	0.287	-0.2324	3.74e-08	-0.2113	5.99e-07	-0.01	0.815	0.2734	7.53e-11	0.084	0.0493	0.4474	2.5e-28	0.2592	7.26e-10	0.2655	2.71e-10	-0.2464	5.07e-09	-0.0514	0.23	-0.1044	0.0145	-0.1677	7.95e-05	-0.2456	5.69e-09	0.0767	0.0729	-0.2352	2.54e-08	-0.1214	0.00441
lung squamous cell carcinoma	0.1717	5.33e-05	0.1925	5.67e-06	0.0572	0.181	-0.0806	0.0595	0.1917	6.18e-06	0.0311	0.467	0.2243	1.12e-07	0.0224	0.601	-0.204	1.47e-06	-0.1509	0.000393	0.0085	0.843	0.0819	0.0555	-0.0327	0.445	0.1203	0.0048	0.1073	0.012	-0.1485	0.000487	-0.1806	2.12e-05	0.025	0.559	-0.0888	0.0378	-0.1383	0.00117	-0.2044	1.39e-06	0.0622	0.146	-0.2015	1.99e-06	-0.0131	0.759
head & neck squamous cell carcinoma	0.0441	0.295	0.2234	8.23e-08	0.355	3.39e-18	0.1378	0.00103	0.298	4.99e-13	0.3246	2.64e-15	0.2245	7.11e-08	0.1615	0.000117	-0.095	0.0241	-0.1723	3.89e-05	0.1286	0.00221	0.3823	4.5e-21	0.0535	0.204	0.4973	1.43e-36	0.542	2.18e-44	-0.0482	0.253	0.0302	0.474	0.0623	0.139	0.247	2.75e-09	0.0798	0.0582	-0.0367	0.384	0.27	7.08e-11	0.1773	2.28e-05	0.1402	0.000844
thyroid carcinoma	0.3348	2.01e-16	-0.0028	0.947	0.1869	6.91e-06	-0.0748	0.0741	0.1314	0.00165	0.0037	0.929	0.1915	4.05e-06	-0.0369	0.379	0.0982	0.019	0.241	5.43e-09	0.0202	0.631	0.2912	1.27e-12	0.0413	0.324	0.3303	5.32e-16	-0.0056	0.893	0.0519	0.216	-0.1209	0.00382	0.0489	0.243	-0.0641	0.126	0.2838	4.85e-12	0.0053	0.899	0.2286	3.32e-08	0.0565	0.178	-0.1873	6.58e-06
lung adenocarcinoma	0.1575	0.000151	0.1491	0.000338	0.1772	1.96e-05	-0.0681	0.103	-0.0374	0.371	0.1569	0.000161	0.056	0.18	0.0812	0.0518	-0.0226	0.589	-0.047	0.261	0.2927	8.33e-13	0.1264	0.00241	-0.0373	0.372	0.0929	0.026	0.2534	7.36e-10	-0.0452	0.28	-0.1665	6.12e-05	-0.0807	0.0533	0.1858	7.48e-06	0.142	0.000646	0.0021	0.961	0.1295	0.00188	0.08	0.0554	-0.0635	0.129
kidney clear cell carcinoma	0.3768	8.76e-22	0.0141	0.729	0.1495	0.00023	-0.0919	0.0241	0.1937	1.65e-06	-0.2291	1.27e-08	-0.0411	0.313	0.046	0.26	0.0837	0.0399	0.2545	2.27e-10	0.0721	0.0769	0.5228	1.36e-43	0.2991	6.32e-14	0.5186	8.18e-43	0.0939	0.0211	-0.2361	4.42e-09	-0.1592	8.62e-05	-0.2172	7.15e-08	0.3728	2.56e-21	0.4916	5.23e-38	0.1776	1.15e-05	0.1993	8.1e-07	-0.1123	0.00575	-0.2676	2.4e-11
breast invasive carcinoma	0.1246	1.36e-05	0.1629	1.17e-08	0.2971	3.94e-26	-0.1495	1.7e-07	0.223	3.99e-15	0.167	4.95e-09	-0.0688	0.0166	-0.112	9.34e-05	-0.0153	0.593	-0.1183	3.66e-05	0.021	0.466	0.3576	7.29e-38	0.021	0.464	0.5508	4.34e-97	0.3208	2.11e-30	0.224	3.03e-15	-0.1835	1.22e-10	-0.0971	0.000708	-0.0189	0.51	0.0646	0.0245	-0.1081	0.000162	0.0485	0.0916	-0.0463	0.107	-0.1336	3.06e-06
