# Supplementary material for: The pan-cancer landscape of netrin family reveals potential oncogenic biomarkers
Source: Sci Rep. 2020 Mar 23;10:5224. doi: 10.1038/s41598-020-62117-5 (PMC7090012; doi:10.1038/s41598-020-62117-5)
Supplement: Supplementary file 8 — Dataset 8. [file 41598_2020_62117_MOESM8_ESM.xlsx]

## Sheet: miRWalk_miRNA_Targets
The pan-cancer landscape of netrin family reveals potential oncogenic biomarkers
Wenjun Hao1,8, Meng Yu2,8, Jiaxing Lin3, Bitian Liu4, Haotian Xing3, Jieping Yang3, Dan Sun3, Feilong Chen3, Mingzhe Jiang3, Chaozhi Tang3, Xizhe Zhang5,6, Yongkang Zhao6,7 and Yuyan Zhu3,7*
1.Department of Urology, The First Affiliated Hospital of Dalian Medical University, Dalian 116011, China
2.Department of Reproductive Biology and Transgenic Animal, China Medical University, Shenyang 110001, China
3.Department of Urology, The First Affiliated Hospital of China Medical University, Shenyang 110001, China
4.Department of Urology, The Second Affiliated Hospital of China Medical University, Shenyang 110001, China
5.School of Computer Science and Engineering, Northeastern University, Shenyang, Liaoning, China
6.National Institute of Health and Medical Big Data, China Medical University, Shenyang, Liaoning, China
7.Joint Laboratory of Artificial Intelligence and Precision Medicine of China Medical University and Northeastern University, Northeastern University, Shenyang, Liaoning, China
8.These authors contributed equally
* Corresponding author: Yuyan Zhu, e-mail: yyzhu@cmu.edu.cn
mirnaid	refseqid	genesymbol	start	end	correlation	energy	seed	accessibility	au	phylopstem	phylopflank	me	number_of_pairings	binding_region_length	longest_consecutive_pairings	position	validated	TargetScan	miRDB
hsa-let-7a-5p	NM_014917	NTNG1	4148	4169	1	-20.9	0	0.0241104	0.559	0.832883	1.89013	-7.89564	17	21	6	3UTR		0	0
hsa-let-7a-5p	NM_014917	NTNG1	3983	4003	1	-16.8	0	0.00222982	0.456	0.464653	-0.000592366	-8.03672	11	14	9	3UTR		0	0
hsa-let-7a-2-3p	NM_014917	NTNG1	5578	5608	1	-26.8	0	1.66e-05	0.529	-0.448754	-0.204138	-8.30604	18	22	12	3UTR		0	0
hsa-let-7d-5p	NM_014917	NTNG1	4148	4168	1	-22.3	0	0.0161645	0.559	0.832883	1.89013	-7.75139	16	20	6	3UTR		0	0
hsa-let-7d-3p	NM_014917	NTNG1	3545	3560	1	-22.6	0	0.00195753	0.529	1.54615	1.72772	-20.1593	13	15	7	3UTR		0	0
hsa-let-7e-5p	NM_014917	NTNG1	4148	4169	1	-18.8	0	0.0241104	0.559	0.832883	1.89013	-7.89564	17	21	6	3UTR		0	0
hsa-miR-16-1-3p	NM_014917	NTNG1	4454	4476	1	-19.8	0	0.0184197	0.603	1.626	1.75205	-12.3581	16	22	6	3UTR		0	0
hsa-miR-17-5p	NM_014917	NTNG1	2515	2556	1	-21.3	0	0.000727989	0.574	3.10086	2.31701	-9.54656	19	27	14	3UTR		1	0
hsa-miR-17-3p	NM_014917	NTNG1	3839	3861	1	-19.8	0	0.0147669	0.603	1.13597	0.801372	-14.1648	16	22	10	3UTR		0	0
hsa-miR-18a-5p	NM_014917	NTNG1	5784	5824	1	-24.3	0	0.000190288	0.471	0.119687	0.0393964	-6.57398	19	22	11	3UTR		0	0
hsa-miR-18a-5p	NM_014917	NTNG1	4470	4491	1	-21	1	0.0058764	0.544	1.72514	1.70637	-6.08354	18	21	12	3UTR		0	0
hsa-miR-19b-2-5p	NM_014917	NTNG1	4524	4545	1	-16.6	0	0.0329617	0.559	0.611431	1.43232	-11.3217	18	21	10	3UTR		0	0
hsa-miR-20a-5p	NM_014917	NTNG1	2515	2556	1	-19.4	0	0.000727989	0.574	3.10086	2.31701	-9.54656	19	27	14	3UTR		1	0
hsa-miR-21-3p	NM_014917	NTNG1	4455	4476	1	-19.9	0	0.0184197	0.603	0.993395	1.80409	-21.0797	13	21	9	3UTR		0	0
hsa-miR-23a-5p	NM_014917	NTNG1	2590	2608	1	-26.7	1	0.131671	0.471	2.79668	4.19828	-7.3076	17	18	17	3UTR		0	0
hsa-miR-23a-5p	NM_014917	NTNG1	5279	5299	1	-25.5	1	0.0102982	0.485	-0.195987	-0.22225	-9.2861	15	20	10	3UTR		0	0
hsa-miR-23a-3p	NM_014917	NTNG1	4684	4714	1	-23	1	0.00234103	0.706	2.03061	1.76758	-3.93757	19	24	10	3UTR		0	0
hsa-miR-24-3p	NM_014917	NTNG1	3209	3232	1	-24.6	1	7.57e-05	0.588	1.23057	1.07153	-4.957	20	23	10	3UTR		0	0
hsa-miR-25-5p	NM_014917	NTNG1	3669	3719	1	-24	1	0.0140484	0.588	2.61224	2.2806	-3.93757	17	35	10	3UTR		0	0
hsa-miR-33a-3p	NM_014917	NTNG1	5967	6000	1	-25.9	0	0.0160561	0.618	-0.348407	-0.15223	-9.33931	16	19	9	3UTR		0	1
hsa-miR-92a-2-5p	NM_014917	NTNG1	2475	2503	1	-23	1	0.000506711	0.456	1.09475	1.73497	-6.23647	20	28	12	3UTR		0	0
hsa-miR-29b-1-5p	NM_014917	NTNG1	2562	2591	1	-20.9	0	0.000100753	0.5	2.74598	3.31144	-8.86514	18	22	12	3UTR		0	0
hsa-miR-29b-1-5p	NM_014917	NTNG1	5582	5604	1	-19.5	1	2.25e-05	0.5	-0.231407	-0.138029	-12.2085	15	22	9	3UTR		0	0
hsa-miR-29b-2-5p	NM_014917	NTNG1	5577	5603	1	-22.1	1	2.38e-05	0.5	-0.277812	-0.17697	-4.99396	19	26	10	3UTR		0	0
hsa-miR-29b-2-5p	NM_014917	NTNG1	3455	3475	1	-21.3	0	0.000348084	0.618	1.24778	1.87503	-10.1906	16	20	9	3UTR		0	0
hsa-miR-105-5p	NM_014917	NTNG1	4361	4378	1	-18.6	0	0.040511	0.691	0.850909	1.7085	-17.1102	13	17	11	3UTR		0	0
hsa-miR-106a-5p	NM_014917	NTNG1	2515	2556	1	-21.3	0	0.000727989	0.574	3.10086	2.31701	-9.54656	19	27	14	3UTR		1	0
hsa-miR-107	NM_014917	NTNG1	5912	5932	1	-23.7	0	0.0266954	0.441	-0.42916	-0.180023	-6.51454	17	20	10	3UTR		0	0
hsa-miR-129-1-3p	NM_014917	NTNG1	4911	4929	1	-17.8	1	0.000139527	0.544	0.016245	0.101053	-5.9255	12	18	8	3UTR		0	0
hsa-miR-148a-3p	NM_014917	NTNG1	3189	3230	1	-18.9	0	6.74e-05	0.588	0.901498	1.65589	-7.08104	14	17	9	3UTR		0	0
hsa-miR-139-5p	NM_014917	NTNG1	5458	5485	1	-24.1	1	0.00190405	0.485	-0.722448	-0.269342	-7.00542	18	21	9	3UTR		0	0
hsa-miR-139-5p	NM_014917	NTNG1	2508	2553	1	-23.2	1	0.00039495	0.588	2.74598	2.52028	-5.45975	18	24	12	3UTR		0	0
hsa-miR-183-3p	NM_014917	NTNG1	5754	5777	1	-18.7	0	0.00404903	0.5	-0.0571481	0.106262	-5.83853	17	23	6	3UTR		0	0
hsa-miR-187-3p	NM_014917	NTNG1	2399	2425	1	-22.5	0	0.0107757	0.529	1.21174	0.820971	-7.0388	18	26	10	3UTR		0	0
hsa-miR-204-3p	NM_014917	NTNG1	2593	2612	1	-22.4	0	0.126157	0.485	2.97718	4.17196	-17.0073	13	19	7	3UTR		0	0
hsa-miR-210-5p	NM_014917	NTNG1	2501	2554	1	-25.2	1	0.000479282	0.588	2.64459	2.34772	-7.14013	20	53	10	3UTR		0	0
hsa-miR-214-5p	NM_014917	NTNG1	3714	3763	1	-27	1	0.00538589	0.5	3.12016	1.86145	-11.2074	16	21	8	3UTR		0	0
hsa-miR-214-3p	NM_014917	NTNG1	4145	4162	1	-25.5	0	0.0016182	0.544	0.998789	1.89226	-13.9752	14	17	7	3UTR		0	0
hsa-miR-214-3p	NM_014917	NTNG1	2572	2592	1	-24.8	1	0.00248312	0.515	3.46186	3.84727	-8.02485	16	20	10	3UTR		0	0
hsa-miR-216a-3p	NM_014917	NTNG1	5452	5484	1	-22	1	0.00159315	0.485	-0.287756	-0.278398	-5.18008	16	21	9	3UTR		0	0
hsa-miR-221-3p	NM_014917	NTNG1	2217	2241	1	-21.3	0	0.0155726	0.544	0.812063	1.75983	-7.24999	15	19	11	3UTR		0	0
hsa-miR-222-3p	NM_014917	NTNG1	4257	4276	1	-25.4	0	3.12e-05	0.574	1.48437	1.72655	-6.19385	18	19	18	3UTR		0	0
hsa-miR-223-5p	NM_014917	NTNG1	2528	2547	1	-18.9	1	2.37e-05	0.559	3.82195	2.59779	-5.08246	17	19	14	3UTR		0	0
hsa-miR-200b-5p	NM_014917	NTNG1	3657	3697	1	-23.8	0	0.00445843	0.662	2.73364	2.40013	-9.69585	16	18	16	3UTR		0	0
hsa-let-7g-5p	NM_014917	NTNG1	2563	2594	1	-18.3	1	0.00357713	0.515	2.94877	3.91644	-3.79332	19	31	9	3UTR		0	0
hsa-miR-15b-5p	NM_014917	NTNG1	4141	4158	1	-18.9	1	0.000542431	0.529	1.25068	1.84764	-13.2745	15	17	11	3UTR		0	0
hsa-miR-15b-3p	NM_014917	NTNG1	3551	3576	1	-20.3	1	0.0102483	0.603	1.72393	1.73137	-6.03692	19	25	9	3UTR		0	0
hsa-miR-23b-3p	NM_014917	NTNG1	4684	4714	1	-20.4	1	0.00234103	0.706	2.17148	1.61556	-3.93757	16	20	10	3UTR		0	0
hsa-miR-122-5p	NM_014917	NTNG1	4529	4548	1	-20.3	1	0.0681265	0.588	0.634607	1.68088	-10.6729	18	19	18	3UTR		0	0
hsa-miR-130a-5p	NM_014917	NTNG1	2229	2244	1	-18.8	0	0.0217032	0.544	0.620622	1.83003	-16.8557	14	15	14	3UTR		0	0
hsa-miR-138-5p	NM_014917	NTNG1	4504	4526	1	-22.8	1	0.000848085	0.544	2.08574	1.09348	-5.9255	17	22	9	3UTR		0	0
hsa-miR-140-5p	NM_014917	NTNG1	2155	2195	1	-19.1	1	0.0199802	0.515	0.702517	0.676193	-6.6181	19	40	13	3UTR		0	0
hsa-miR-141-3p	NM_014917	NTNG1	2224	2240	1	-17.9	1	0.0149896	0.544	0.620621	1.80809	-5.9255	12	15	10	3UTR		0	0
hsa-miR-127-3p	NM_014917	NTNG1	2135	2154	1	-22.8	0	1.19e-05	0.382	0.0502862	0.83852	-10.1659	16	19	11	3UTR		0	0
hsa-miR-134-5p	NM_014917	NTNG1	2699	2727	1	-26.7	1	0.0145194	0.5	2.57194	3.30915	-8.57351	20	28	11	3UTR		0	0
hsa-miR-138-1-3p	NM_014917	NTNG1	5454	5474	1	-25	1	0.000709122	0.485	-0.547364	-0.364431	-13.2279	16	20	9	3UTR		0	0
hsa-miR-184	NM_014917	NTNG1	2641	2672	1	-23.8	1	0.0135925	0.574	4.4661	3.38797	-3.79332	21	31	12	3UTR		0	0
hsa-miR-188-3p	NM_014917	NTNG1	5155	5177	1	-20.2	0	0.000107103	0.574	-0.467153	-0.0556177	-8.02599	16	22	11	3UTR		0	0
hsa-miR-193a-5p	NM_014917	NTNG1	5239	5258	1	-24	1	0.00197773	0.485	-0.0704098	-0.148895	-8.00486	16	19	9	3UTR		0	0
hsa-miR-194-5p	NM_014917	NTNG1	6115	6141	1	-19.7	0	0.0107479	0.647	0.0710692	0.18787	-6.82535	19	26	11	3UTR		0	0
hsa-miR-206	NM_014917	NTNG1	4535	4563	1	-20.3	0	0.00107919	0.632	0.480104	1.65326	-10.6049	18	28	11	3UTR		0	0
hsa-miR-30c-1-3p	NM_014917	NTNG1	5233	5286	1	-24.1	1	0.0408152	0.515	-0.0635094	-0.154329	-4.90607	14	16	14	3UTR		0	0
hsa-miR-200a-3p	NM_014917	NTNG1	2218	2240	1	-17.9	1	0.0149896	0.544	0.980597	1.77153	-5.9255	12	15	10	3UTR		0	0
hsa-miR-302a-3p	NM_014917	NTNG1	2277	2295	1	-20.8	0	0.00852985	0.574	1.46882	2.05231	-7.48304	16	18	11	3UTR		0	0
hsa-miR-299-3p	NM_014917	NTNG1	4158	4172	1	-17.6	1	0.0529081	0.559	0.938093	1.78922	-5.81821	12	14	7	3UTR		0	0
hsa-miR-30e-3p	NM_014917	NTNG1	5951	5969	1	-19.3	1	6.07e-05	0.5	-0.259014	-0.242192	-5.61866	17	18	17	3UTR		0	0
hsa-miR-363-5p	NM_014917	NTNG1	2460	2487	1	-20.1	0	2e-05	0.441	1.63455	1.11491	-7.16235	11	14	6	3UTR		0	0
hsa-miR-363-5p	NM_014917	NTNG1	4703	4720	1	-19.1	1	0.00658544	0.691	1.18537	1.66541	-4.65016	15	17	12	3UTR		0	0
hsa-miR-365a-5p	NM_014917	NTNG1	2577	2601	1	-23.6	0	0.00639343	0.5	2.90197	3.69167	-13.4406	17	24	6	3UTR		0	0
hsa-miR-365b-5p	NM_014917	NTNG1	5812	5836	1	-27.5	1	0.028751	0.485	0.337807	0.0101406	-3.93757	19	24	10	3UTR		0	0
hsa-miR-367-5p	NM_014917	NTNG1	3826	3861	1	-21.6	1	0.0147669	0.603	0.306031	0.838549	-3.79332	15	17	15	3UTR		0	0
hsa-miR-369-5p	NM_014917	NTNG1	5789	5808	1	-17.5	1	1.97e-05	0.485	-0.0200906	0.0137976	-4.90607	14	19	9	3UTR		0	0
hsa-miR-372-5p	NM_014917	NTNG1	4912	4953	1	-19.4	1	0.00269012	0.632	0.0177366	0.112826	-3.93757	18	22	11	3UTR		0	0
hsa-miR-377-5p	NM_014917	NTNG1	3273	3297	1	-20.7	1	0.00497892	0.603	1.29697	1.23101	-6.76235	19	24	9	3UTR		0	0
hsa-miR-377-5p	NM_014917	NTNG1	4448	4463	1	-19.6	0	0.00829252	0.632	1.48437	1.74036	-8.17564	13	15	8	3UTR		0	0
hsa-miR-330-5p	NM_014917	NTNG1	5193	5213	1	-23.9	1	0.00392923	0.544	-0.0583339	-0.165197	-5.22701	18	20	14	3UTR		0	0
hsa-miR-330-5p	NM_014917	NTNG1	4897	4917	1	-22.9	1	0.00324593	0.574	0.205586	0.299381	-6.9638	18	20	12	3UTR		0	0
hsa-miR-330-3p	NM_014917	NTNG1	2527	2550	1	-21.4	0	0.000109143	0.559	3.21116	2.73525	-13.0924	18	23	7	3UTR		0	0
hsa-miR-328-5p	NM_014917	NTNG1	4147	4168	1	-32.6	0	0.0161645	0.559	1.65432	1.83384	-13.5494	17	21	6	3UTR		0	0
hsa-miR-342-3p	NM_014917	NTNG1	5430	5447	1	-24.6	1	0.000159623	0.382	-0.215307	-0.28836	-11.1852	15	17	9	3UTR		0	0
hsa-miR-342-3p	NM_014917	NTNG1	3210	3225	1	-19.8	1	0.000552635	0.603	0.864394	1.12997	-4.957	14	15	14	3UTR		0	0
hsa-miR-148b-3p	NM_014917	NTNG1	5973	5993	1	-20.1	1	0.0430588	0.559	-0.431624	-0.148573	-6.76235	18	20	15	3UTR		0	0
hsa-miR-148b-3p	NM_014917	NTNG1	3208	3230	1	-18.9	0	6.74e-05	0.588	1.05918	1.16405	-6.89492	14	17	9	3UTR		0	0
hsa-miR-148b-3p	NM_014917	NTNG1	2671	2688	1	-16.9	0	0.0284496	0.574	4.81889	3.41463	-8.66051	14	17	9	3UTR		0	0
hsa-miR-338-5p	NM_014917	NTNG1	4257	4270	1	-18.8	0	0.000104602	0.603	1.5481	1.79772	-20.4803	12	13	12	3UTR		0	0
hsa-miR-339-3p	NM_014917	NTNG1	4504	4525	1	-25.7	0	0.00128142	0.559	1.87063	1.16677	-13.4406	18	21	12	3UTR		0	0
hsa-miR-346	NM_014917	NTNG1	3749	3771	1	-26.1	0	0.232624	0.5	1.26343	1.5651	-10.2048	18	22	10	3UTR		0	0
hsa-miR-423-5p	NM_014917	NTNG1	3704	3723	1	-22.3	1	0.00175206	0.588	2.92243	1.73569	-4.79441	18	19	18	3UTR		0	0
hsa-miR-18b-5p	NM_014917	NTNG1	5805	5824	1	-20.8	0	0.000190288	0.471	-0.0103385	0.0649954	-6.57398	17	19	11	3UTR		0	0
hsa-miR-20b-5p	NM_014917	NTNG1	2515	2556	1	-21.5	0	0.000727989	0.574	3.10086	2.31701	-9.54656	19	27	14	3UTR		1	0
hsa-miR-20b-3p	NM_014917	NTNG1	4140	4158	1	-20.7	0	0.000542431	0.529	1.05949	1.91456	-6.74759	14	18	12	3UTR		0	0
hsa-miR-429	NM_014917	NTNG1	2226	2240	1	-15.9	1	0.0149896	0.544	0.692617	1.8271	-5.9255	12	14	10	3UTR		0	0
hsa-miR-431-5p	NM_014917	NTNG1	3725	3747	1	-20	1	0.000619241	0.515	2.35032	1.4047	-5.76291	13	22	9	3UTR		0	0
hsa-miR-433-5p	NM_014917	NTNG1	4320	4337	1	-21.1	0	0.00472757	0.706	0.354184	1.461	-8.33988	10	12	10	3UTR		0	0
hsa-miR-412-3p	NM_014917	NTNG1	3743	3767	1	-21.7	1	0.00525994	0.515	-0.347343	1.43445	-7.35355	18	24	9	3UTR		0	0
hsa-miR-483-5p	NM_014917	NTNG1	2950	2970	1	-20.9	1	0.00727455	0.632	2.5139	3.79125	-5.41313	18	20	9	3UTR		0	0
hsa-miR-489-5p	NM_014917	NTNG1	2475	2497	1	-20.4	1	0.000284715	0.441	1.16171	1.95141	-7.09331	17	22	9	3UTR		0	0
hsa-miR-490-3p	NM_014917	NTNG1	5736	5769	1	-34.4	1	0.000119166	0.559	-0.0242698	0.00738683	-4.957	19	23	16	3UTR		0	0
hsa-miR-511-5p	NM_014917	NTNG1	2355	2406	1	-23.9	1	0.000326367	0.5	1.17722	1.28455	-3.93757	19	35	11	3UTR		0	1
hsa-miR-146b-5p	NM_014917	NTNG1	3215	3259	1	-18.2	0	0.00194638	0.559	1.64228	0.991179	-6.46361	17	23	11	3UTR		0	0
hsa-miR-146b-3p	NM_014917	NTNG1	2742	2766	1	-24.9	0	0.00155536	0.5	1.29432	2.30356	-7.38222	18	24	10	3UTR		0	0
hsa-miR-432-5p	NM_014917	NTNG1	2496	2517	1	-21.7	0	0.000676335	0.456	1.88414	2.23073	-12.9282	17	21	11	3UTR		0	0
hsa-miR-494-5p	NM_014917	NTNG1	3749	3775	1	-22.7	0	0.000186434	0.485	0.464654	1.55554	-10.4278	20	26	11	3UTR		0	0
hsa-miR-193b-5p	NM_014917	NTNG1	2481	2500	1	-20.6	1	0.000683248	0.441	1.18887	2.1035	-8.55011	13	19	7	3UTR		0	0
hsa-miR-193b-3p	NM_014917	NTNG1	5554	5604	1	-25.7	1	2.25e-05	0.5	0.115542	-0.119916	-8.42926	16	19	14	3UTR		0	0
hsa-miR-497-3p	NM_014917	NTNG1	2469	2511	1	-17.5	0	0.00022842	0.441	1.24458	1.48783	-10.8357	12	15	11	3UTR		0	0
hsa-miR-181d-3p	NM_014917	NTNG1	5745	5768	1	-23	0	0.00013916	0.574	0.382526	0.0956033	-13.2346	17	23	7	3UTR		0	0
hsa-miR-512-5p	NM_014917	NTNG1	5453	5474	1	-22.8	0	0.000709122	0.485	-0.0076206	-0.344508	-9.18534	17	21	12	3UTR		0	0
hsa-miR-512-5p	NM_014917	NTNG1	5811	5843	1	-22.1	0	0.000185172	0.529	0.0821478	0.0489047	-6.51454	19	32	14	3UTR		0	0
hsa-miR-520e	NM_014917	NTNG1	3534	3558	1	-19	0	0.00230252	0.544	1.68347	1.81903	-9.54656	16	24	13	3UTR		0	0
hsa-miR-519c-3p	NM_014917	NTNG1	4449	4490	1	-21.6	1	0.00139902	0.559	1.66242	1.75311	-3.93757	20	23	13	3UTR		0	0
hsa-miR-520a-3p	NM_014917	NTNG1	5200	5221	1	-20.4	0	0.032709	0.529	-0.275681	-0.186026	-6.42973	18	21	8	3UTR		0	0
hsa-miR-519b-3p	NM_014917	NTNG1	4467	4490	1	-18.6	1	0.00139902	0.559	1.85518	1.93899	-6.76235	20	23	10	3UTR		0	0
hsa-miR-525-5p	NM_014917	NTNG1	5352	5368	1	-21.7	1	1.91e-09	0.471	0.0286038	-0.180592	-10.8446	14	16	10	3UTR		0	0
hsa-miR-520b	NM_014917	NTNG1	2700	2720	1	-20.7	0	0.0230435	0.515	2.32453	3.32254	-10.6336	17	20	11	3UTR		0	0
hsa-miR-518b	NM_014917	NTNG1	5358	5386	1	-21	0	0.00105256	0.456	-0.245253	-0.310094	-11.0902	16	28	10	3UTR		0	0
hsa-miR-524-5p	NM_014917	NTNG1	2799	2824	1	-21	1	0.00982146	0.721	5.45303	3.8436	-7.14013	19	25	10	3UTR		0	0
hsa-miR-517a-3p	NM_014917	NTNG1	3467	3485	1	-21.6	0	0.00134484	0.618	2.00529	1.80198	-9.6489	17	18	17	3UTR		0	0
hsa-miR-517b-3p	NM_014917	NTNG1	3467	3485	1	-21.6	0	0.00134484	0.618	2.00529	1.80198	-9.6489	17	18	17	3UTR		0	0
hsa-miR-517c-3p	NM_014917	NTNG1	3467	3485	1	-19.6	0	0.00134484	0.618	2.26965	1.80077	-10.2026	17	18	17	3UTR		0	0
hsa-miR-500a-3p	NM_014917	NTNG1	2501	2547	1	-24.5	1	2.37e-05	0.559	2.80037	2.37112	-3.93757	17	21	9	3UTR		0	0
hsa-miR-502-3p	NM_014917	NTNG1	2508	2548	1	-26	1	2.9e-05	0.544	2.74403	2.35503	-3.93757	18	22	10	3UTR		0	1
hsa-miR-502-3p	NM_014917	NTNG1	3680	3699	1	-21.1	1	0.00538332	0.662	2.39078	2.53026	-5.81384	16	19	7	3UTR		0	1
hsa-miR-503-5p	NM_014917	NTNG1	3633	3689	1	-23.1	1	0.0632133	0.618	2.56444	2.59083	-4.957	19	50	9	3UTR		0	0
hsa-miR-514a-5p	NM_014917	NTNG1	4838	4861	1	-19.8	0	0.0276868	0.618	0.61017	0.546613	-9.54656	17	23	13	3UTR		0	0
hsa-miR-532-5p	NM_014917	NTNG1	4948	4969	1	-20.1	0	0.0287643	0.676	0.0813879	0.0204534	-8.93978	17	21	11	3UTR		0	0
hsa-miR-455-3p	NM_014917	NTNG1	2280	2293	1	-19.9	0	0.0124688	0.574	1.79054	1.90169	-8.60958	11	13	9	3UTR		0	0
hsa-miR-487b-3p	NM_014917	NTNG1	6103	6117	1	-21	0	0.00584583	0.588	0.640606	0.102297	-10.8357	13	14	13	3UTR		0	0
hsa-miR-551a	NM_014917	NTNG1	3538	3557	1	-24.8	0	0.00189521	0.529	2.023	1.87503	-11.8972	16	19	11	3UTR		0	0
hsa-miR-92b-3p	NM_014917	NTNG1	5587	5607	1	-22.7	0	1.33e-05	0.515	-0.342092	-0.156141	-9.65801	16	20	10	3UTR		0	0
hsa-miR-555	NM_014917	NTNG1	5880	5920	1	-21.6	0	0.000495396	0.456	-0.0469081	-0.161738	-6.80703	13	16	8	3UTR		0	0
hsa-miR-555	NM_014917	NTNG1	5105	5123	1	-20.8	0	0.00375399	0.721	-0.0221104	-0.00309254	-5.69428	16	18	14	3UTR		0	0
hsa-miR-557	NM_014917	NTNG1	2144	2174	1	-26	1	3.26e-05	0.441	0.913102	0.7537	-6.76235	21	30	11	3UTR		0	0
hsa-miR-564	NM_014917	NTNG1	3394	3413	1	-21.1	0	0.00219068	0.647	1.18187	1.38197	-10.6827	15	19	11	3UTR		0	0
hsa-miR-570-5p	NM_014917	NTNG1	2394	2413	1	-22.7	0	5.42e-06	0.544	1.63755	0.749313	-10.3719	16	19	13	3UTR		0	0
hsa-miR-571	NM_014917	NTNG1	4258	4282	1	-21.3	0	7.66e-05	0.588	1.04642	1.90819	-5.72816	16	19	10	3UTR		0	0
hsa-miR-573	NM_014917	NTNG1	3170	3210	1	-19.2	1	0.00152963	0.559	0.289664	1.93833	-4.65016	17	21	8	3UTR		0	0
hsa-miR-573	NM_014917	NTNG1	4527	4548	1	-16.2	1	0.0681265	0.588	0.598189	1.63308	-5.81821	17	21	10	3UTR		0	0
hsa-miR-574-5p	NM_014917	NTNG1	2195	2217	1	-23.3	0	0.276025	0.574	0.883854	1.10468	-6.74759	17	22	12	3UTR		0	0
hsa-miR-578	NM_014917	NTNG1	3530	3552	1	-20.3	1	0.000101794	0.529	1.89398	1.78494	-7.3076	18	22	11	3UTR		0	0
hsa-miR-581	NM_014917	NTNG1	3528	3550	1	-18.7	0	3.03e-07	0.515	1.39929	1.90181	-6.07158	14	16	14	3UTR		0	0
hsa-miR-582-5p	NM_014917	NTNG1	5955	6007	1	-27	1	0.000646085	0.632	-0.210254	-0.206353	-6.08354	17	21	12	3UTR		0	0
hsa-miR-585-3p	NM_014917	NTNG1	2462	2487	1	-21.4	1	2e-05	0.441	0.50363	1.32696	-11.254	15	17	15	3UTR		0	0
hsa-miR-588	NM_014917	NTNG1	4259	4279	1	-19.3	1	5.79e-05	0.588	1.46313	1.86145	-8.06181	11	15	8	3UTR		0	0
hsa-miR-589-3p	NM_014917	NTNG1	5591	5616	1	-21.4	0	0.0173421	0.5	-0.521201	-0.161574	-16.9706	16	25	9	3UTR		0	0
hsa-miR-550a-3p	NM_014917	NTNG1	2153	2175	1	-24	0	0.000159948	0.441	0.620623	0.684968	-11.2881	16	22	6	3UTR		0	0
hsa-miR-598-5p	NM_014917	NTNG1	5784	5810	1	-22.4	1	2.72e-06	0.485	0.00136339	0.0657267	-5.52986	19	26	9	3UTR		0	0
hsa-miR-598-3p	NM_014917	NTNG1	2998	3012	1	-15.6	0	0.000710089	0.588	5.06102	4.85527	-7.61527	13	14	13	3UTR		0	0
hsa-miR-601	NM_014917	NTNG1	5265	5288	1	-24.4	0	0.113199	0.529	-0.33364	-0.202327	-12.6723	17	23	10	3UTR		0	0
hsa-miR-609	NM_014917	NTNG1	3167	3185	1	-20	0	0.00633533	0.647	1.14266	1.95294	-10.1722	15	18	7	3UTR		0	0
hsa-miR-611	NM_014917	NTNG1	5218	5245	1	-27.6	0	0.000141634	0.5	0.340133	-0.0999926	-7.07355	18	27	6	3UTR		0	0
hsa-miR-615-5p	NM_014917	NTNG1	5586	5601	1	-26.4	0	3.23e-05	0.485	-0.427823	-0.159763	-7.37138	14	15	14	3UTR		0	0
hsa-miR-618	NM_014917	NTNG1	3746	3767	1	-20.5	0	0.00525994	0.515	0.279705	1.58528	-6.51454	18	21	11	3UTR		0	0
hsa-miR-619-5p	NM_014917	NTNG1	4140	4162	1	-23	0	0.0016182	0.544	0.91786	1.86145	-9.70971	17	22	9	3UTR		0	0
hsa-miR-621	NM_014917	NTNG1	4139	4159	1	-22.8	0	0.000852336	0.544	1.46549	1.80409	-10.5724	18	20	12	3UTR		0	0
hsa-miR-628-3p	NM_014917	NTNG1	3979	4014	1	-24.4	1	0.014152	0.441	0.559627	0.0588911	-4.957	16	19	10	3UTR		0	0
hsa-miR-629-3p	NM_014917	NTNG1	5962	5999	1	-19.9	1	0.0176715	0.603	-0.237885	-0.114197	-8.97335	16	21	9	3UTR		0	0
hsa-miR-630	NM_014917	NTNG1	3395	3413	1	-18.8	1	0.00219068	0.647	1.30406	1.55363	-10.1092	14	18	10	3UTR		0	0
hsa-miR-638	NM_014917	NTNG1	2583	2609	1	-33	1	0.126749	0.485	1.72555	4.20513	-4.99396	22	26	10	3UTR		0	0
hsa-miR-642a-5p	NM_014917	NTNG1	3524	3562	1	-23.2	1	0.00155467	0.544	0.847389	1.87138	-11.254	18	38	9	3UTR		0	0
hsa-miR-644a	NM_014917	NTNG1	2244	2261	1	-20.5	0	0.0254706	0.544	1.71609	1.69402	-11.0886	14	17	11	3UTR		0	0
hsa-miR-650	NM_014917	NTNG1	3657	3690	1	-26	0	0.0642769	0.632	2.53807	2.56462	-9.54656	16	33	8	3UTR		0	0
hsa-miR-652-5p	NM_014917	NTNG1	5353	5371	1	-26.5	1	4.53e-10	0.471	-0.0704097	-0.231306	-7.39609	16	18	10	3UTR		0	0
hsa-miR-661	NM_014917	NTNG1	3953	3974	1	-27	0	0.00167284	0.574	0.340457	0.505017	-7.75705	18	21	7	3UTR		0	0
hsa-miR-662	NM_014917	NTNG1	2148	2166	1	-23.6	1	2.54e-05	0.412	0.687474	0.663032	-11.3749	12	18	7	3UTR		0	0
hsa-miR-662	NM_014917	NTNG1	5577	5598	1	-22.7	1	7.5e-06	0.485	-0.215307	-0.173347	-4.99396	15	21	7	3UTR		0	0
hsa-miR-654-5p	NM_014917	NTNG1	2683	2704	1	-22.7	0	0.023227	0.515	4.40361	3.41252	-17.4418	14	21	8	3UTR		0	0
hsa-miR-654-5p	NM_014917	NTNG1	5901	5919	1	-22.1	0	0.000898817	0.456	-0.63934	-0.220981	-12.8934	15	18	8	3UTR		0	0
hsa-miR-659-3p	NM_014917	NTNG1	5233	5258	1	-25.1	1	0.00197773	0.485	-0.0462597	-0.176969	-8.3038	18	25	9	3UTR		0	0
hsa-miR-758-3p	NM_014917	NTNG1	5873	5889	1	-18	0	0.00528453	0.471	-0.361409	-0.0973748	-8.49178	13	16	8	3UTR		0	0
hsa-miR-668-3p	NM_014917	NTNG1	5410	5429	1	-22.6	1	8.09e-06	0.456	-0.275681	-0.239457	-8.38244	15	19	8	3UTR		0	0
hsa-miR-668-3p	NM_014917	NTNG1	4256	4276	1	-21.2	1	3.12e-05	0.574	1.36077	1.84021	-7.14013	15	20	7	3UTR		0	0
hsa-miR-767-5p	NM_014917	NTNG1	3281	3300	1	-22	0	0.0105425	0.632	1.69688	1.22371	-13.8149	16	19	12	3UTR		0	0
hsa-miR-1271-3p	NM_014917	NTNG1	2534	2556	1	-25.6	1	0.000727989	0.574	4.43749	2.82592	-5.03583	19	22	8	3UTR		0	0
hsa-miR-1301-5p	NM_014917	NTNG1	5458	5474	1	-23.7	1	0.000709122	0.485	-0.33364	-0.263908	-7.61919	15	16	15	3UTR		0	0
hsa-miR-1185-2-3p	NM_014917	NTNG1	2719	2738	1	-21.5	1	0.0681694	0.471	2.07612	2.69313	-8.57351	15	19	11	3UTR		0	0
hsa-miR-449c-3p	NM_014917	NTNG1	3743	3768	1	-24.4	0	0.0091854	0.529	1.419	1.76054	-10.3856	20	25	11	3UTR		0	0
hsa-miR-766-3p	NM_014917	NTNG1	5579	5604	1	-27.1	0	2.25e-05	0.5	-0.549953	-0.186026	-16.3364	15	18	12	3UTR		0	0
hsa-miR-378d	NM_014917	NTNG1	5894	5912	1	-21.8	1	0.000743983	0.426	0.210206	-0.202696	-4.65016	16	18	9	3UTR		0	0
hsa-miR-670-5p	NM_014917	NTNG1	4512	4535	1	-21	1	0.00175007	0.529	1.67432	1.22307	-5.22671	17	23	14	3UTR		0	0
hsa-miR-670-5p	NM_014917	NTNG1	3459	3479	1	-19.8	1	0.000385429	0.618	1.64228	1.85555	-6.76235	18	20	12	3UTR		0	0
hsa-miR-2113	NM_014917	NTNG1	5589	5609	1	-21.1	1	2.34e-05	0.529	-0.360204	-0.149801	-4.84971	17	20	14	3UTR		0	0
hsa-miR-761	NM_014917	NTNG1	3988	4002	1	-26.4	1	0.00196423	0.471	0.0789913	0.104566	-5.76291	13	14	13	3UTR		0	0
hsa-miR-891a-3p	NM_014917	NTNG1	2172	2195	1	-21.6	1	0.0199802	0.515	0.57884	0.671806	-6.25121	19	23	7	3UTR		0	0
hsa-miR-450b-5p	NM_014917	NTNG1	3140	3161	1	-21.2	1	0.000397251	0.632	2.48252	3.28115	-4.957	18	21	9	3UTR		0	0
hsa-miR-892b	NM_014917	NTNG1	3542	3560	1	-22.2	0	0.00195753	0.529	1.24562	1.72285	-9.30909	15	18	10	3UTR		0	0
hsa-miR-744-5p	NM_014917	NTNG1	2476	2501	1	-23.7	1	0.000226706	0.441	1.0106	2.00844	-4.76182	17	25	7	3UTR		0	0
hsa-miR-885-3p	NM_014917	NTNG1	3984	4003	1	-28.2	1	0.00222982	0.456	0.0114462	0.143867	-5.61866	16	19	12	3UTR		0	0
hsa-miR-877-5p	NM_014917	NTNG1	3992	4012	1	-27.6	0	0.0148696	0.456	0.0783973	0.142805	-8.2121	18	20	12	3UTR		0	0
hsa-miR-887-5p	NM_014917	NTNG1	5628	5655	1	-24.2	1	5.04e-05	0.588	-0.00235177	-0.109954	-7.28438	17	22	11	3UTR		0	0
hsa-miR-665	NM_014917	NTNG1	5363	5382	1	-27.7	1	6.4e-05	0.471	-0.218757	-0.263908	-6.82767	15	19	7	3UTR		0	0
hsa-miR-921	NM_014917	NTNG1	3704	3727	1	-21.2	1	0.000817821	0.588	2.89498	1.73399	-6.76235	20	23	10	3UTR		0	0
hsa-miR-924	NM_014917	NTNG1	3515	3533	1	-18.4	0	0.0179817	0.515	0.836567	1.76911	-6.08631	15	18	14	3UTR		0	0
hsa-miR-933	NM_014917	NTNG1	4024	4060	1	-25.2	0	0.0121522	0.588	0.267289	0.939459	-6.85796	19	36	8	3UTR		0	0
hsa-miR-941	NM_014917	NTNG1	5195	5212	1	-24.3	1	0.00373075	0.529	0.0231709	-0.157952	-4.957	14	17	11	3UTR		0	0
hsa-miR-942-5p	NM_014917	NTNG1	4009	4026	1	-22.2	1	0.000217769	0.471	-0.27889	0.730204	-3.93757	16	17	16	3UTR		0	0
hsa-miR-1178-5p	NM_014917	NTNG1	5892	5921	1	-29.5	1	0.000669893	0.456	-0.061049	-0.209278	-4.17062	17	19	17	3UTR		0	0
hsa-miR-1178-3p	NM_014917	NTNG1	3535	3559	1	-21.4	0	0.00108061	0.529	2.13051	1.87016	-6.72377	19	24	8	3UTR		0	0
hsa-miR-1180-3p	NM_014917	NTNG1	2764	2798	1	-25.3	1	0.00405577	0.618	1.96988	3.58916	-4.99396	21	34	10	3UTR		0	0
hsa-miR-1184	NM_014917	NTNG1	2532	2553	1	-21.9	1	0.00039495	0.588	3.81841	2.54514	-6.25121	18	21	10	3UTR		0	1
hsa-miR-1226-3p	NM_014917	NTNG1	3535	3572	1	-26.4	1	0.0300814	0.574	1.89437	1.89207	-3.93757	22	37	9	3UTR		0	0
hsa-miR-1227-5p	NM_014917	NTNG1	4152	4170	1	-26.6	0	0.0325371	0.559	1.16571	1.83808	-5.71431	14	18	8	3UTR		0	0
hsa-miR-1228-5p	NM_014917	NTNG1	2577	2599	1	-29.3	1	0.0043431	0.515	2.74876	4.22075	-4.957	19	22	14	3UTR		0	0
hsa-miR-1228-3p	NM_014917	NTNG1	3725	3768	1	-27.6	0	0.0091854	0.529	1.99423	1.43445	-6.35195	15	19	13	3UTR		0	0
hsa-miR-1231	NM_014917	NTNG1	5271	5290	1	-22.9	1	0.0939304	0.529	-0.328005	-0.181498	-6.03692	17	19	12	3UTR		0	1
hsa-miR-1200	NM_014917	NTNG1	4255	4292	1	-24	0	0.0102881	0.618	1.39514	1.83384	-5.48126	20	37	11	3UTR		0	0
hsa-miR-663b	NM_014917	NTNG1	4252	4281	1	-27.2	1	7.55e-05	0.588	1.15863	1.76585	-6.08354	19	29	7	3UTR		0	0
hsa-miR-1205	NM_014917	NTNG1	5774	5792	1	-20.1	1	0.00154198	0.456	0.0929171	0.0774291	-4.90607	14	18	11	3UTR		0	0
hsa-miR-1287-5p	NM_014917	NTNG1	4834	4863	1	-22.4	1	0.0217231	0.618	0.867975	0.659814	-6.98666	20	29	7	3UTR		0	0
hsa-miR-1251-5p	NM_014917	NTNG1	5454	5473	1	-21.8	1	0.00052424	0.471	-0.301556	-0.298322	-9.45357	16	19	10	3UTR		0	0
hsa-miR-1260a	NM_014917	NTNG1	3751	3766	1	-21.3	1	0.00493366	0.5	-0.101855	1.39302	-7.99135	12	15	10	3UTR		0	0
hsa-miR-1263	NM_014917	NTNG1	4251	4278	1	-21.9	1	0.000135473	0.588	1.58149	1.54279	-7.69925	18	22	12	3UTR		0	0
hsa-miR-1268a	NM_014917	NTNG1	3992	4009	1	-25.5	0	0.0372153	0.471	0.110585	0.152365	-7.91236	15	17	12	3UTR		0	0
hsa-miR-1269a	NM_014917	NTNG1	4246	4270	1	-24.5	1	0.000104602	0.603	1.6151	1.78285	-6.08354	19	24	8	3UTR		0	0
hsa-miR-1279	NM_014917	NTNG1	3546	3568	1	-14.8	0	0.0343866	0.559	1.47774	1.71311	-11.0886	15	22	12	3UTR		0	0
hsa-miR-1282	NM_014917	NTNG1	4121	4140	1	-18.9	1	0.0175122	0.515	1.99423	1.51624	-6.54929	16	19	11	3UTR		0	0
hsa-miR-1252-3p	NM_014917	NTNG1	3556	3576	1	-17.4	0	0.0102483	0.603	2.19259	1.96755	-7.38222	18	20	13	3UTR		0	0
hsa-miR-1322	NM_014917	NTNG1	3817	3865	1	-24.8	0	0.0239512	0.588	0.592118	0.7472	-8.05661	16	19	12	3UTR		0	0
hsa-miR-320d	NM_014917	NTNG1	5263	5279	1	-19.7	1	0.027572	0.529	-0.158958	-0.17063	-9.9649	14	16	9	3UTR		0	0
hsa-miR-1910-3p	NM_014917	NTNG1	3673	3720	1	-23.7	1	0.0038814	0.588	2.0792	2.46101	-4.17062	15	17	15	3UTR		0	0
hsa-miR-1914-3p	NM_014917	NTNG1	2484	2519	1	-32	0	0.00154687	0.456	1.48636	2.06548	-12.6462	18	24	9	3UTR		0	0
hsa-miR-1915-3p	NM_014917	NTNG1	2150	2166	1	-25.7	0	2.54e-05	0.412	0.737614	0.630859	-7.93788	14	16	9	3UTR		0	0
hsa-miR-2115-5p	NM_014917	NTNG1	2322	2342	1	-20.9	0	6.44e-06	0.588	1.63455	1.48929	-10.3555	17	20	9	3UTR		0	0
hsa-miR-2117	NM_014917	NTNG1	5221	5239	1	-19.8	1	0.00034909	0.5	0.101053	-0.0882197	-7.98267	15	18	10	3UTR		0	0
hsa-miR-548q	NM_014917	NTNG1	5757	5782	1	-21.8	0	0.00011841	0.485	-0.0200907	0.173242	-6.82535	19	25	11	3UTR		0	0
hsa-miR-2682-3p	NM_014917	NTNG1	3740	3759	1	-24.9	1	0.000343461	0.529	1.76054	1.63414	-11.2074	16	19	8	3UTR		0	0
hsa-miR-3116	NM_014917	NTNG1	5159	5178	1	-23.9	0	5.09e-05	0.574	-0.539602	-0.082786	-6.85796	16	19	10	3UTR		0	0
hsa-miR-3121-5p	NM_014917	NTNG1	5396	5434	1	-18.9	1	9.02e-05	0.426	-0.279706	-0.240362	-8.2379	13	17	9	3UTR		0	0
hsa-miR-3125	NM_014917	NTNG1	5263	5282	1	-26.7	1	0.0329476	0.529	0.028604	-0.198704	-6.24613	16	19	10	3UTR		0	0
hsa-miR-3138	NM_014917	NTNG1	6045	6067	1	-24.6	0	0.109225	0.574	-0.055348	0.105954	-9.87071	16	22	9	3UTR		0	0
hsa-miR-3140-3p	NM_014917	NTNG1	5638	5659	1	-22.9	1	0.000723329	0.588	-0.173594	-0.134406	-7.28438	19	21	11	3UTR		0	0
hsa-miR-3140-3p	NM_014917	NTNG1	4688	4706	1	-21.1	0	0.00281961	0.691	2.38187	1.67194	-5.33701	16	18	11	3UTR		0	0
hsa-miR-3148	NM_014917	NTNG1	2708	2730	1	-19	0	0.0199158	0.485	1.96355	3.39437	-17.4381	15	22	7	3UTR		0	0
hsa-miR-3149	NM_014917	NTNG1	3819	3840	1	-19.7	0	4.44e-06	0.529	0.76207	0.671783	-8.36268	17	21	11	3UTR		0	0
hsa-miR-3155a	NM_014917	NTNG1	2366	2397	1	-23.4	1	0.00339033	0.5	1.53056	0.970136	-3.93757	18	31	9	3UTR		0	0
hsa-miR-3158-3p	NM_014917	NTNG1	5782	5823	1	-29.1	0	0.000297482	0.456	-0.0582121	0.0876689	-7.7949	19	41	9	3UTR		0	0
hsa-miR-3160-3p	NM_014917	NTNG1	5209	5229	1	-19.3	0	0.0542015	0.485	-0.311905	-0.111766	-9.06122	14	20	11	3UTR		0	0
hsa-miR-3164	NM_014917	NTNG1	4962	5000	1	-20	0	0.000907826	0.691	-0.206526	-0.0329777	-7.0584	13	16	11	3UTR		0	0
hsa-miR-1260b	NM_014917	NTNG1	3751	3766	1	-21.3	1	0.00493366	0.5	-0.101855	1.39302	-7.99135	12	15	10	3UTR		0	0
hsa-miR-3169	NM_014917	NTNG1	4892	4914	1	-20	0	0.000643277	0.544	0.0437522	0.275836	-12.3311	16	22	6	3UTR		0	0
hsa-miR-3173-5p	NM_014917	NTNG1	3748	3767	1	-27.4	1	0.00525994	0.515	0.0519114	1.47693	-4.957	18	19	18	3UTR		0	0
hsa-miR-3173-3p	NM_014917	NTNG1	4140	4163	1	-20.8	0	0.00195317	0.559	0.998789	1.89226	-8.81344	15	23	7	3UTR		0	0
hsa-miR-1193	NM_014917	NTNG1	6042	6058	1	-21.2	1	0.344509	0.618	0.269218	0.138135	-9.59293	14	16	9	3UTR		0	0
hsa-miR-3175	NM_014917	NTNG1	4080	4103	1	-19.7	0	2.37e-05	0.632	0.61143	1.24219	-6.62614	19	23	9	3UTR		0	0
hsa-miR-3184-5p	NM_014917	NTNG1	4799	4827	1	-24.5	0	2.16e-05	0.588	1.01287	0.969533	-8.35072	19	28	7	3UTR		0	0
hsa-miR-3186-5p	NM_014917	NTNG1	5583	5601	1	-21.8	0	3.23e-05	0.485	-0.293793	-0.160669	-7.7148	15	18	9	3UTR		0	0
hsa-miR-3187-5p	NM_014917	NTNG1	2130	2165	1	-28.3	0	7.37e-06	0.397	0.386638	1.00523	-6.9696	21	35	9	3UTR		0	0
hsa-miR-3189-3p	NM_014917	NTNG1	5191	5213	1	-25	1	0.00392923	0.544	0.028047	-0.196893	-4.99396	18	22	11	3UTR		0	0
hsa-miR-3189-3p	NM_014917	NTNG1	3684	3754	1	-24.5	1	0.00294384	0.515	2.65538	1.58579	-3.93757	21	43	9	3UTR		0	0
hsa-miR-3197	NM_014917	NTNG1	2147	2160	1	-26.1	0	3.07e-05	0.397	0.347641	0.733227	-6.74759	12	13	12	3UTR		0	0
hsa-miR-3198	NM_014917	NTNG1	2483	2501	1	-22.7	1	0.000226706	0.441	1.03354	2.01137	-4.90607	14	18	8	3UTR		0	1
hsa-miR-3199	NM_014917	NTNG1	4449	4463	1	-20.7	0	0.00829252	0.632	2.03065	1.67663	-9.43454	12	14	10	3UTR		0	0
hsa-miR-3200-3p	NM_014917	NTNG1	2742	2764	1	-22.2	0	0.00075525	0.5	1.57919	2.76374	-6.51454	17	22	8	3UTR		0	0
hsa-miR-4297	NM_014917	NTNG1	3743	3760	1	-19.7	1	0.000809196	0.529	0.304142	1.52261	-8.2379	13	17	9	3UTR		0	0
hsa-miR-378c	NM_014917	NTNG1	5894	5912	1	-21.8	1	0.000743983	0.426	0.210206	-0.202696	-4.65016	16	18	9	3UTR		0	0
hsa-miR-4307	NM_014917	NTNG1	3550	3564	1	-17.5	0	0.0602868	0.559	1.99031	1.82877	-15.5666	13	14	13	3UTR		0	1
hsa-miR-4312	NM_014917	NTNG1	3536	3561	1	-23.6	1	0.00146585	0.529	1.87949	1.79955	-4.957	17	25	10	3UTR		0	0
hsa-miR-4258	NM_014917	NTNG1	3753	3767	1	-22.1	1	0.00525994	0.515	-0.0694831	1.41851	-8.78315	12	14	7	3UTR		0	0
hsa-miR-4259	NM_014917	NTNG1	5186	5229	1	-22.5	1	0.0542015	0.485	-0.136821	-0.127161	-6.01339	19	43	10	3UTR		0	0
hsa-miR-4326	NM_014917	NTNG1	3751	3771	1	-22.9	1	0.232624	0.5	0.0297746	1.59909	-5.10125	15	20	9	3UTR		0	0
hsa-miR-4326	NM_014917	NTNG1	5988	6011	1	-21.2	1	0.0014934	0.603	-0.0502331	-0.131019	-4.957	16	23	8	3UTR		0	0
hsa-miR-4327	NM_014917	NTNG1	2717	2765	1	-24.8	1	0.00116317	0.485	2.27882	3.84481	-3.79332	18	48	8	3UTR		0	0
hsa-miR-2355-3p	NM_014917	NTNG1	2414	2432	1	-19.6	0	0.0969843	0.559	0.342766	1.06812	-6.57952	15	18	8	3UTR		0	0
hsa-miR-2355-3p	NM_014917	NTNG1	3735	3757	1	-19.5	0	0.00023772	0.529	1.25777	1.48649	-6.82535	14	17	12	3UTR		0	0
hsa-miR-4330	NM_014917	NTNG1	5142	5178	1	-22.2	1	5.09e-05	0.574	-0.188743	-0.108143	-7.73085	15	21	10	3UTR		0	0
hsa-miR-3614-3p	NM_014917	NTNG1	5163	5182	1	-19.9	1	0.000577464	0.544	-0.373208	-0.109954	-5.52986	16	19	13	3UTR		0	0
hsa-miR-3616-3p	NM_014917	NTNG1	5804	5824	1	-25.5	1	0.000190288	0.471	0.0481733	0.0137976	-5.02746	19	20	19	3UTR		0	0
hsa-miR-23c	NM_014917	NTNG1	4696	4714	1	-16	1	0.00234103	0.706	1.37374	1.75166	-4.79441	15	18	10	3UTR		0	0
hsa-miR-3622a-3p	NM_014917	NTNG1	3723	3765	1	-29.6	1	0.00477556	0.485	0.901674	1.59271	-6.98666	19	23	13	3UTR		0	1
hsa-miR-3622b-5p	NM_014917	NTNG1	2127	2160	1	-23.5	1	3.07e-05	0.397	0.152654	0.932113	-8.59606	15	21	8	3UTR		0	0
hsa-miR-3650	NM_014917	NTNG1	2148	2180	1	-19	1	0.00255862	0.471	0.551294	0.755163	-4.52877	17	32	9	3UTR		0	0
hsa-miR-3655	NM_014917	NTNG1	2740	2765	1	-27.9	0	0.00116317	0.485	2.10781	2.76618	-5.83853	20	25	10	3UTR		0	0
hsa-miR-3659	NM_014917	NTNG1	2267	2298	1	-23.6	1	0.00665731	0.559	2.63289	1.31526	-4.02637	16	19	14	3UTR		0	0
hsa-miR-3659	NM_014917	NTNG1	4504	4525	1	-22.2	1	0.00128142	0.559	1.84127	1.08923	-10.1092	18	21	10	3UTR		0	0
hsa-miR-3667-5p	NM_014917	NTNG1	5937	5961	1	-23.9	1	1.37e-05	0.544	-0.466731	-0.283881	-8.3038	19	24	10	3UTR		0	0
hsa-miR-3675-3p	NM_014917	NTNG1	5233	5252	1	-21.2	1	0.00139661	0.515	0.258629	-0.174253	-8.63862	15	19	8	3UTR		0	0
hsa-miR-3679-5p	NM_014917	NTNG1	3989	4010	1	-21.7	0	0.0281224	0.471	0.0640506	0.000469838	-8.61914	17	21	6	3UTR		0	0
hsa-miR-3679-3p	NM_014917	NTNG1	3750	3770	1	-22.3	1	0.233968	0.515	-0.0791949	1.48968	-7.32605	16	20	7	3UTR		0	0
hsa-miR-3685	NM_014917	NTNG1	3751	3770	1	-19	0	0.233968	0.515	0.294701	1.44719	-11.0902	11	14	9	3UTR		0	0
hsa-miR-3687	NM_014917	NTNG1	2139	2164	1	-25.2	1	1.18e-05	0.397	0.413637	0.709828	-8.57351	19	25	10	3UTR		0	0
hsa-miR-3688-5p	NM_014917	NTNG1	2393	2409	1	-19	0	0.000316281	0.515	1.75545	0.791723	-10.6827	14	16	12	3UTR		0	0
hsa-miR-3689a-5p	NM_014917	NTNG1	3253	3280	1	-22.6	1	0.000307949	0.603	1.03135	1.26997	-11.254	18	27	9	3UTR		0	0
hsa-miR-3692-5p	NM_014917	NTNG1	4000	4021	1	-22.7	0	3.58e-06	0.5	0.18848	0.254337	-9.29912	16	21	8	3UTR		0	0
hsa-miR-3692-3p	NM_014917	NTNG1	5434	5487	1	-24.4	1	0.00153832	0.456	-0.375298	-0.290171	-4.99396	18	23	8	3UTR		0	0
hsa-miR-3689b-5p	NM_014917	NTNG1	3253	3280	1	-22.6	1	0.000307949	0.603	1.03135	1.26997	-11.254	18	27	9	3UTR		0	0
hsa-miR-3911	NM_014917	NTNG1	2125	2144	1	-25.4	1	0.000126593	0.324	-0.281889	0.926264	-8.40586	17	19	13	3UTR		0	0
hsa-miR-3925-3p	NM_014917	NTNG1	4901	4918	1	-19.5	1	0.00347115	0.574	0.0437522	0.17169	-7.28438	16	17	16	3UTR		0	0
hsa-miR-3926	NM_014917	NTNG1	3709	3731	1	-21.6	0	0.000104067	0.574	2.63627	1.91839	-10.2417	18	22	9	3UTR		0	0
hsa-miR-3928-5p	NM_014917	NTNG1	3756	3788	1	-25.2	1	0.00086561	0.5	0.0621341	1.51199	-7.3076	21	32	9	3UTR		0	0
hsa-miR-3928-5p	NM_014917	NTNG1	5291	5307	1	-23.1	1	0.000149482	0.471	-0.221345	-0.280209	-5.03583	15	16	15	3UTR		0	0
hsa-miR-3929	NM_014917	NTNG1	2573	2589	1	-20.3	1	2.51e-05	0.5	3.13064	3.92272	-5.08246	15	16	15	3UTR		0	0
hsa-miR-3939	NM_014917	NTNG1	5950	5966	1	-22.3	0	2.72e-05	0.485	0.000300036	-0.235609	-10.977	13	16	11	3UTR		0	0
hsa-miR-3942-5p	NM_014917	NTNG1	3138	3159	1	-19.4	1	8.03e-05	0.647	2.12703	3.59037	-7.05635	18	21	11	3UTR		0	0
hsa-miR-3944-5p	NM_014917	NTNG1	2143	2161	1	-19.7	0	1.3e-05	0.382	0.21115	0.698129	-8.63109	14	18	11	3UTR		0	0
hsa-miR-1268b	NM_014917	NTNG1	4155	4174	1	-28.5	1	0.0999683	0.559	1.22944	1.89119	-5.03583	17	19	13	3UTR		0	0
hsa-miR-378f	NM_014917	NTNG1	5894	5912	1	-21.8	1	0.000743983	0.426	0.210206	-0.202696	-4.65016	16	18	9	3UTR		0	0
hsa-miR-4420	NM_014917	NTNG1	2370	2392	1	-22	0	0.00741158	0.485	2.04124	1.21874	-7.23797	17	22	10	3UTR		0	0
hsa-miR-378g	NM_014917	NTNG1	2469	2506	1	-23.6	1	0.000170653	0.456	1.72369	1.52877	-7.54065	13	15	13	3UTR		0	0
hsa-miR-4425	NM_014917	NTNG1	2582	2611	1	-23.5	0	0.122467	0.471	2.34891	4.2968	-8.38289	17	29	9	3UTR		0	0
hsa-miR-4428	NM_014917	NTNG1	6029	6044	1	-18.3	1	0.133644	0.632	-0.0354149	0.0905943	-6.09222	13	15	7	3UTR		0	0
hsa-miR-4433a-3p	NM_014917	NTNG1	3993	4009	1	-25.7	1	0.0372153	0.471	0.18848	0.254337	-7.78178	14	16	8	3UTR		0	0
hsa-miR-4433a-3p	NM_014917	NTNG1	2219	2231	1	-24.9	0	0.253223	0.559	0.950326	1.71304	-9.77961	11	12	11	3UTR		0	0
hsa-miR-4437	NM_014917	NTNG1	5807	5828	1	-24.3	1	4.47e-05	0.471	0.340732	0.0130662	-5.9255	16	21	7	3UTR		0	0
hsa-miR-4443	NM_014917	NTNG1	5639	5654	1	-19.3	1	9.24e-05	0.603	0.403527	-0.0773524	-5.96246	13	15	8	3UTR		0	0
hsa-miR-4447	NM_014917	NTNG1	2692	2707	1	-23.3	0	0.0400088	0.529	4.33389	3.52707	-6.46361	13	15	11	3UTR		0	1
hsa-miR-4448	NM_014917	NTNG1	5455	5473	1	-23.9	0	0.00052424	0.471	-0.0076206	-0.344508	-8.50749	15	18	5	3UTR		0	0
hsa-miR-548ah-5p	NM_014917	NTNG1	4529	4546	1	-20.3	0	0.0464398	0.574	0.611431	1.43232	-8.32703	16	17	16	3UTR		0	0
hsa-miR-4454	NM_014917	NTNG1	5813	5834	1	-26	0	0.0162211	0.485	0.106685	0.0211115	-8.18405	16	21	6	3UTR		0	0
hsa-miR-4456	NM_014917	NTNG1	3171	3189	1	-21.5	1	0.00807739	0.632	0.750632	2.07347	-4.957	15	18	8	3UTR		0	0
hsa-miR-378h	NM_014917	NTNG1	2744	2759	1	-22	1	7.94e-07	0.485	1.89398	2.44113	-4.90607	14	15	14	3UTR		0	0
hsa-miR-548ai	NM_014917	NTNG1	2394	2413	1	-22.7	0	5.42e-06	0.544	1.63755	0.749313	-10.3719	16	19	13	3UTR		0	0
hsa-miR-4465	NM_014917	NTNG1	3396	3418	1	-20.9	0	2.99e-05	0.647	1.61572	1.49884	-8.88283	17	22	8	3UTR		0	0
hsa-miR-4467	NM_014917	NTNG1	4146	4166	1	-25.4	0	0.00353243	0.574	1.30498	1.83702	-8.11448	17	20	12	3UTR		0	0
hsa-miR-4467	NM_014917	NTNG1	4499	4517	1	-24	1	0.00289725	0.529	0.660099	1.33885	-6.19951	17	18	17	3UTR		0	0
hsa-miR-3689e	NM_014917	NTNG1	3253	3280	1	-22.6	1	0.000307949	0.603	1.03135	1.26997	-11.254	18	27	9	3UTR		0	0
hsa-miR-3689f	NM_014917	NTNG1	3253	3280	1	-24.7	1	0.000307949	0.603	1.08005	1.27606	-9.9649	19	27	10	3UTR		0	0
hsa-miR-3155b	NM_014917	NTNG1	2367	2397	1	-22	1	0.00339033	0.5	1.53056	0.970136	-3.93757	17	30	9	3UTR		0	0
hsa-miR-4480	NM_014917	NTNG1	3305	3324	1	-18.6	1	0.00130837	0.706	1.18556	0.987527	-5.9255	12	14	12	3UTR		0	0
hsa-miR-4483	NM_014917	NTNG1	2210	2226	1	-19.1	0	0.357371	0.544	0.842907	1.31819	-6.07158	14	16	11	3UTR		0	0
hsa-miR-4514	NM_014917	NTNG1	4145	4161	1	-18.8	1	0.00132164	0.544	1.29014	1.82215	-8.93197	12	16	7	3UTR		0	0
hsa-miR-4516	NM_014917	NTNG1	5267	5284	1	-22.2	1	0.0467868	0.529	0.0664384	-0.197799	-8.52688	14	17	9	3UTR		0	0
hsa-miR-4524a-3p	NM_014917	NTNG1	3851	3876	1	-20.4	0	0.0883428	0.588	0.889536	0.604864	-19.7918	15	25	8	3UTR		0	0
hsa-miR-4524a-3p	NM_014917	NTNG1	2739	2755	1	-19.2	0	0.000202853	0.485	2.25202	2.49104	-17.1102	14	16	8	3UTR		0	0
hsa-miR-4538	NM_014917	NTNG1	4456	4477	1	-22.7	0	0.0159209	0.588	1.29897	1.78497	-10.9252	16	21	7	3UTR		0	0
hsa-miR-4632-5p	NM_014917	NTNG1	4157	4180	1	-29.3	1	0.375111	0.544	1.04249	1.7308	-5.69245	19	23	13	3UTR		0	0
hsa-miR-4633-3p	NM_014917	NTNG1	4141	4163	1	-22.6	0	0.00195317	0.559	0.839965	1.86039	-5.69428	18	22	10	3UTR		0	0
hsa-miR-4646-3p	NM_014917	NTNG1	3535	3562	1	-26.7	0	0.00155467	0.544	1.95335	1.82633	-9.54656	14	17	9	3UTR		0	0
hsa-miR-4649-3p	NM_014917	NTNG1	3750	3768	1	-27	0	0.0091854	0.529	0.358433	1.53217	-12.9896	15	18	12	3UTR		0	0
hsa-miR-4653-5p	NM_014917	NTNG1	5208	5252	1	-24.2	1	0.00139661	0.515	-0.32469	-0.211383	-3.93757	16	19	13	3UTR		0	0
hsa-miR-4654	NM_014917	NTNG1	5751	5790	1	-22.8	1	0.000334703	0.456	0.0609724	0.15435	-4.17062	20	39	10	3UTR		0	0
hsa-miR-4655-3p	NM_014917	NTNG1	3534	3554	1	-25.3	0	0.00228005	0.515	2.03185	1.9152	-8.48048	16	20	8	3UTR		0	0
hsa-miR-4658	NM_014917	NTNG1	2130	2149	1	-22.3	0	0.000177812	0.353	-0.281889	0.926264	-15.9878	15	19	13	3UTR		0	0
hsa-miR-4671-3p	NM_014917	NTNG1	3724	3742	1	-21	0	0.00019601	0.529	0.825803	1.4525	-11.6925	15	18	8	3UTR		0	0
hsa-miR-4677-5p	NM_014917	NTNG1	5589	5612	1	-24.5	1	0.00461492	0.529	-0.167008	-0.209572	-4.65016	19	23	13	3UTR		0	0
hsa-miR-4686	NM_014917	NTNG1	3542	3560	1	-21	1	0.00195753	0.529	1.69147	1.75694	-10.0807	15	18	9	3UTR		0	0
hsa-miR-4687-3p	NM_014917	NTNG1	2697	2721	1	-28.8	1	0.0219732	0.5	2.41604	3.34689	-3.93757	17	24	10	3UTR		0	1
hsa-miR-4688	NM_014917	NTNG1	4138	4160	1	-27.7	0	0.00103509	0.544	1.2436	1.83596	-9.86134	16	22	8	3UTR		0	0
hsa-miR-4690-5p	NM_014917	NTNG1	5903	5933	1	-25.6	1	0.0312463	0.456	0.264668	-0.171246	-6.23647	18	30	10	3UTR		0	1
hsa-miR-4692	NM_014917	NTNG1	4136	4161	1	-22.3	1	0.00132164	0.544	1.23475	1.83596	-3.79332	16	18	16	3UTR		0	0
hsa-miR-4695-3p	NM_014917	NTNG1	3750	3766	1	-24.1	0	0.00493366	0.5	0.304142	1.52261	-15.7181	15	16	15	3UTR		0	0
hsa-miR-4697-5p	NM_014917	NTNG1	2672	2705	1	-28.2	1	0.0298439	0.515	5.66729	3.73169	-6.76235	20	33	13	3UTR		0	0
hsa-miR-4701-5p	NM_014917	NTNG1	5553	5603	1	-28.3	0	2.38e-05	0.5	-0.260661	-0.119011	-6.72377	20	50	10	3UTR		0	0
hsa-miR-4701-3p	NM_014917	NTNG1	2243	2286	1	-27	1	0.105705	0.559	1.85554	1.47905	-3.93757	18	20	18	3UTR		0	0
hsa-miR-4710	NM_014917	NTNG1	6033	6049	1	-26	1	0.142448	0.618	-0.36141	0.0510989	-5.18008	15	16	15	3UTR		0	0
hsa-miR-4710	NM_014917	NTNG1	4152	4168	1	-23.2	0	0.0161645	0.559	1.20395	1.85296	-10.4142	14	16	10	3UTR		0	0
hsa-miR-4712-5p	NM_014917	NTNG1	5947	5968	1	-18.9	1	3.34e-05	0.5	-0.130288	-0.164663	-4.90607	14	21	8	3UTR		0	0
hsa-miR-4716-5p	NM_014917	NTNG1	3537	3562	1	-25	0	0.00155467	0.544	1.74233	1.79346	-6.9696	18	25	11	3UTR		0	0
hsa-miR-4720-3p	NM_014917	NTNG1	3281	3300	1	-20.9	0	0.0105425	0.632	1.32354	1.22736	-12.3778	16	19	13	3UTR		0	0
hsa-miR-4724-3p	NM_014917	NTNG1	3535	3557	1	-20.8	0	0.00189521	0.529	1.81862	1.78737	-6.46361	17	22	7	3UTR		0	0
hsa-miR-4725-5p	NM_014917	NTNG1	3538	3561	1	-24.5	0	0.00146585	0.529	2.13515	1.88355	-10.5818	12	16	6	3UTR		0	0
hsa-miR-4727-3p	NM_014917	NTNG1	2749	2778	1	-23.1	1	0.00874129	0.529	1.55374	2.59574	-7.09331	19	29	8	3UTR		0	0
hsa-miR-4728-3p	NM_014917	NTNG1	3535	3559	1	-28.9	0	0.00108061	0.529	1.68876	1.77642	-12.9166	19	24	8	3UTR		0	0
hsa-miR-4736	NM_014917	NTNG1	5309	5324	1	-21.6	0	0.109359	0.529	-0.087973	-0.2141	-7.91236	14	15	14	3UTR		0	0
hsa-miR-4736	NM_014917	NTNG1	4146	4163	1	-20.8	1	0.00195317	0.559	1.42367	1.84021	-13.5529	11	17	7	3UTR		0	0
hsa-miR-3064-5p	NM_014917	NTNG1	4536	4557	1	-25.8	1	0.00713898	0.632	-0.099281	1.56828	-7.28438	19	21	11	3UTR		0	0
hsa-miR-4738-5p	NM_014917	NTNG1	4281	4303	1	-21	1	0.000548122	0.618	1.97299	1.62033	-6.10696	18	22	12	3UTR		0	0
hsa-miR-4743-3p	NM_014917	NTNG1	3535	3562	1	-22.8	1	0.00155467	0.544	1.93786	1.80807	-3.93757	21	27	10	3UTR		0	0
hsa-miR-4747-5p	NM_014917	NTNG1	2583	2601	1	-24.8	0	0.00639343	0.5	2.82397	3.99564	-7.9845	15	18	6	3UTR		0	0
hsa-miR-4752	NM_014917	NTNG1	5386	5407	1	-19.8	0	0.00380809	0.471	0.00423442	-0.33364	-11.3547	18	21	10	3UTR		0	0
hsa-miR-371b-3p	NM_014917	NTNG1	5734	5761	1	-22.2	0	1.63e-05	0.574	0.0125575	0.0189271	-6.82535	20	27	9	3UTR		0	0
hsa-miR-4755-3p	NM_014917	NTNG1	5450	5470	1	-23.3	1	3.69e-07	0.471	-0.336055	-0.353564	-9.59293	13	15	13	3UTR		0	0
hsa-miR-4758-3p	NM_014917	NTNG1	3724	3767	1	-30.7	1	0.00525994	0.515	1.10584	1.50668	-6.78234	15	19	11	3UTR		0	0
hsa-miR-4766-3p	NM_014917	NTNG1	2322	2344	1	-20	0	4.72e-06	0.574	1.4502	1.61652	-10.7522	16	22	11	3UTR		0	0
hsa-miR-4768-3p	NM_014917	NTNG1	4685	4702	1	-18.5	1	0.0133571	0.706	1.96118	1.65531	-5.03583	15	17	8	3UTR		0	0
hsa-miR-4772-3p	NM_014917	NTNG1	3544	3560	1	-19.2	0	0.00195753	0.529	2.25851	1.82146	-10.729	13	16	8	3UTR		0	0
hsa-miR-4772-3p	NM_014917	NTNG1	2533	2553	1	-18.9	1	0.00039495	0.588	4.33094	2.82154	-11.3749	16	20	9	3UTR		0	0
hsa-miR-4774-3p	NM_014917	NTNG1	2536	2555	1	-18.3	1	0.000564551	0.574	3.59557	2.73818	-7.2559	15	19	7	3UTR		0	0
hsa-miR-4776-5p	NM_014917	NTNG1	4146	4165	1	-23.1	0	0.00275516	0.574	0.668597	1.79453	-12.7823	17	19	13	3UTR		0	0
hsa-miR-4436b-5p	NM_014917	NTNG1	3746	3766	1	-28.1	0	0.00493366	0.5	1.63004	1.6522	-8.3861	17	20	11	3UTR		0	0
hsa-miR-4781-5p	NM_014917	NTNG1	4544	4570	1	-19.2	0	0.00762194	0.662	0.374678	1.56722	-8.05661	20	26	10	3UTR		0	0
hsa-miR-4781-3p	NM_014917	NTNG1	4548	4564	1	-19	0	0.00106607	0.632	0.932023	1.54067	-10.282	14	16	10	3UTR		0	0
hsa-miR-2467-5p	NM_014917	NTNG1	4249	4268	1	-22.5	0	0.00010449	0.588	1.16146	1.55023	-14.2298	16	19	8	3UTR		0	0
hsa-miR-4786-5p	NM_014917	NTNG1	5431	5463	1	-22.3	0	2.5e-08	0.456	-0.253946	-0.184214	-16.4904	16	32	9	3UTR		0	0
hsa-miR-4786-3p	NM_014917	NTNG1	4257	4276	1	-25.4	0	3.12e-05	0.574	1.41153	1.89863	-10.603	17	19	11	3UTR		0	0
hsa-miR-4788	NM_014917	NTNG1	5939	5962	1	-21.6	0	1.44e-05	0.544	-0.209811	-0.176366	-6.51454	18	23	10	3UTR		0	0
hsa-miR-4804-5p	NM_014917	NTNG1	4251	4270	1	-19.6	0	0.000104602	0.603	1.00284	1.58209	-11.6594	16	19	6	3UTR		0	0
hsa-miR-4804-5p	NM_014917	NTNG1	2581	2599	1	-18.6	1	0.0043431	0.515	2.96047	3.85984	-7.2559	13	18	7	3UTR		0	0
hsa-miR-5004-3p	NM_014917	NTNG1	3535	3560	1	-25.7	0	0.00195753	0.529	1.49668	1.74476	-10.1906	19	25	9	3UTR		0	0
hsa-miR-5006-3p	NM_014917	NTNG1	3535	3564	1	-25.1	1	0.0602868	0.559	1.29107	1.7192	-7.28438	17	22	7	3UTR		0	0
hsa-miR-5008-5p	NM_014917	NTNG1	4891	4934	1	-24.4	1	0.00280134	0.559	0.076213	0.20067	-3.93757	19	43	11	3UTR		0	0
hsa-miR-5010-5p	NM_014917	NTNG1	4154	4168	1	-23.9	0	0.0161645	0.559	1.20112	1.78816	-7.35753	13	14	13	3UTR		0	0
hsa-miR-5090	NM_014917	NTNG1	5781	5816	1	-26.7	0	1.31e-05	0.456	0.057925	0.0628012	-5.49511	21	35	11	3UTR		0	0
hsa-miR-5092	NM_014917	NTNG1	2367	2395	1	-22	1	0.00404112	0.471	1.29067	0.974523	-4.67302	19	28	8	3UTR		0	0
hsa-miR-5092	NM_014917	NTNG1	2464	2480	1	-19.8	0	2.58e-05	0.471	0.790793	1.32696	-8.10683	14	16	7	3UTR		0	0
hsa-miR-5194	NM_014917	NTNG1	5253	5272	1	-23.2	1	0.00453513	0.485	-0.217722	-0.159763	-6.10696	16	19	10	3UTR		0	0
hsa-miR-5194	NM_014917	NTNG1	2592	2610	1	-21.7	1	0.151881	0.471	1.61505	4.18315	-10.0215	17	18	17	3UTR		0	0
hsa-miR-5197-3p	NM_014917	NTNG1	4193	4216	1	-15.8	1	0.00917716	0.721	2.06375	1.43232	-6.90779	11	13	11	3UTR		0	0
hsa-miR-5571-5p	NM_014917	NTNG1	3751	3768	1	-19.1	0	0.0091854	0.529	0.658886	1.49393	-16.0746	13	17	7	3UTR		0	0
hsa-miR-5579-3p	NM_014917	NTNG1	3997	4015	1	-17.1	0	0.0116362	0.456	0.282562	0.307447	-8.35072	15	18	12	3UTR		0	0
hsa-miR-664b-3p	NM_014917	NTNG1	3746	3766	1	-24.6	1	0.00493366	0.5	0.0519114	1.49074	-4.67302	16	20	14	3UTR		0	1
hsa-miR-664b-3p	NM_014917	NTNG1	5588	5604	1	-23	0	2.25e-05	0.5	-0.293793	-0.160669	-10.883	14	16	11	3UTR		0	1
hsa-miR-5584-3p	NM_014917	NTNG1	3749	3773	1	-23.1	1	0.000186213	0.485	0.139744	1.62033	-4.957	15	19	10	3UTR		0	0
hsa-miR-5587-3p	NM_014917	NTNG1	5798	5819	1	-24.2	1	0.000271442	0.471	0.0796792	0.0254999	-8.57351	16	21	7	3UTR		0	0
hsa-miR-5588-3p	NM_014917	NTNG1	2532	2554	1	-16.9	0	0.000479282	0.588	3.70921	2.56269	-9.23153	15	22	11	3UTR		0	0
hsa-miR-5591-3p	NM_014917	NTNG1	5418	5436	1	-20.8	0	0.00118494	0.412	-0.34813	-0.193271	-10.853	14	18	9	3UTR		0	0
hsa-miR-548ax	NM_014917	NTNG1	4454	4474	1	-18	1	0.00403613	0.603	1.76763	1.85933	-7.51743	18	20	9	3UTR		0	0
hsa-miR-5699-3p	NM_014917	NTNG1	3714	3762	1	-28.7	1	0.000695477	0.515	3.36385	1.73186	-3.79332	17	19	17	3UTR		0	0
hsa-miR-5706	NM_014917	NTNG1	5108	5127	1	-19.3	1	0.00288494	0.676	0.0422887	-0.032072	-12.6408	17	19	15	3UTR		0	0
hsa-miR-5708	NM_014917	NTNG1	4914	4943	1	-22.3	1	0.000101659	0.603	0.0617779	0.137277	-3.93757	17	21	10	3UTR		0	0
hsa-miR-6075	NM_014917	NTNG1	4146	4163	1	-24.9	0	0.00195317	0.559	1.24832	1.83065	-8.40165	15	17	12	3UTR		0	0
hsa-miR-6077	NM_014917	NTNG1	2397	2417	1	-22.1	0	0.00041907	0.559	1.79054	0.733227	-13.9215	16	20	7	3UTR		0	0
hsa-miR-6080	NM_014917	NTNG1	4140	4157	1	-21.6	1	0.000270595	0.544	0.974511	1.8657	-5.19005	15	17	13	3UTR		0	0
hsa-miR-6088	NM_014917	NTNG1	5927	5948	1	-22.3	0	0.0366176	0.5	-0.666971	-0.186605	-8.51906	17	21	9	3UTR		0	0
hsa-miR-6124	NM_014917	NTNG1	5264	5284	1	-24.4	0	0.0467868	0.529	-0.339073	-0.157046	-12.1239	16	20	8	3UTR		0	0
hsa-miR-6128	NM_014917	NTNG1	3967	3981	1	-14.9	1	0.00830763	0.544	0.0629465	0.118375	-8.25288	13	14	13	3UTR		0	0
hsa-miR-6130	NM_014917	NTNG1	6017	6046	1	-17.4	1	0.163217	0.632	-0.064349	-0.0717761	-7.05204	12	15	8	3UTR		0	0
hsa-miR-6133	NM_014917	NTNG1	2582	2603	1	-21.3	1	0.01375	0.5	2.82397	4.19389	-5.95809	16	21	6	3UTR		0	0
hsa-miR-6134	NM_014917	NTNG1	3986	4003	1	-17.6	0	0.00222982	0.456	0.0492134	0.152365	-8.03672	14	17	9	3UTR		0	0
hsa-miR-6499-3p	NM_014917	NTNG1	2153	2192	1	-24	1	0.0193243	0.544	0.620622	0.68643	-4.17062	20	34	16	3UTR		0	0
hsa-miR-6501-5p	NM_014917	NTNG1	4448	4479	1	-34.5	1	0.0100509	0.559	1.80445	1.79984	-4.957	20	31	14	3UTR		0	0
hsa-miR-6507-3p	NM_014917	NTNG1	5548	5569	1	-21.7	0	0.110169	0.441	-0.398844	-0.122633	-13.6656	17	21	13	3UTR		0	0
hsa-miR-6508-3p	NM_014917	NTNG1	3469	3488	1	-17.9	0	0.000309711	0.618	1.85477	1.80564	-10.3702	17	19	13	3UTR		0	0
hsa-miR-6510-5p	NM_014917	NTNG1	3977	4001	1	-22.1	1	0.00186717	0.471	0.0503938	0.113064	-6.46952	17	24	8	3UTR		0	0
hsa-miR-6513-5p	NM_014917	NTNG1	5739	5761	1	-25.7	0	1.63e-05	0.574	0.42584	0.0445303	-13.9286	17	22	11	3UTR		0	0
hsa-miR-6515-5p	NM_014917	NTNG1	6036	6053	1	-19.5	1	0.358029	0.618	-0.471932	0.106685	-7.47494	14	17	9	3UTR		0	0
hsa-miR-6715b-5p	NM_014917	NTNG1	2710	2734	1	-25.1	0	0.0577428	0.456	2.43982	3.25071	-9.69585	17	24	10	3UTR		0	0
hsa-miR-6716-5p	NM_014917	NTNG1	5913	5941	1	-22.9	0	0.0363477	0.471	-0.500723	-0.184411	-12.4881	16	28	7	3UTR		0	0
hsa-miR-6717-5p	NM_014917	NTNG1	4157	4180	1	-23.7	1	0.375111	0.544	1.03293	1.74142	-5.52986	17	23	9	3UTR		0	0
hsa-miR-892c-3p	NM_014917	NTNG1	3534	3559	1	-23.2	1	0.00108061	0.529	2.04703	1.83242	-4.957	16	18	16	3UTR		0	0
hsa-miR-6726-3p	NM_014917	NTNG1	3734	3766	1	-26.1	0	0.00493366	0.5	1.24537	1.46631	-8.05661	17	22	14	3UTR		0	0
hsa-miR-6728-5p	NM_014917	NTNG1	5356	5400	1	-27.1	1	0.0358946	0.456	-0.23342	-0.260286	-4.99396	22	44	9	3UTR		0	0
hsa-miR-6728-3p	NM_014917	NTNG1	3750	3768	1	-29.2	1	0.0091854	0.529	-0.0330647	1.49074	-7.54034	17	18	17	3UTR		0	0
hsa-miR-6733-3p	NM_014917	NTNG1	4523	4539	1	-20.3	1	0.000460934	0.529	0.558128	1.3739	-8.42926	15	16	15	3UTR		0	0
hsa-miR-6735-5p	NM_014917	NTNG1	4147	4163	1	-26.1	0	0.00195317	0.559	0.836425	1.88163	-8.81344	13	16	8	3UTR		0	0
hsa-miR-6736-5p	NM_014917	NTNG1	5807	5830	1	-25.5	0	4.89e-05	0.471	0.116437	0.00428942	-8.05661	18	23	10	3UTR		0	0
hsa-miR-6739-3p	NM_014917	NTNG1	5591	5612	1	-23.3	1	0.00461492	0.529	-0.0286964	-0.218628	-7.10297	17	21	8	3UTR		0	0
hsa-miR-6740-5p	NM_014917	NTNG1	5258	5288	1	-24.8	1	0.113199	0.529	0.0684509	-0.192365	-5.77128	19	25	8	3UTR		0	0
hsa-miR-6740-3p	NM_014917	NTNG1	4010	4034	1	-23	1	4.79e-07	0.515	-0.345455	0.715334	-4.957	14	17	10	3UTR		0	0
hsa-miR-6743-5p	NM_014917	NTNG1	2575	2610	1	-32.5	1	0.151881	0.471	2.85247	4.27185	-3.93757	21	28	9	3UTR		0	0
hsa-miR-6745	NM_014917	NTNG1	2583	2600	1	-21.9	1	0.00519036	0.515	2.72648	4.13083	-6.6181	14	17	6	3UTR		0	0
hsa-miR-6745	NM_014917	NTNG1	2445	2504	1	-20.7	1	0.000447567	0.456	1.69026	1.04764	-14.0151	14	20	9	3UTR		0	0
hsa-miR-6746-3p	NM_014917	NTNG1	3734	3767	1	-27.9	0	0.00525994	0.515	1.06657	1.4302	-8.4155	14	16	14	3UTR		0	0
hsa-miR-6748-5p	NM_014917	NTNG1	2750	2775	1	-25.3	1	0.000210679	0.544	1.16527	2.40947	-12.0642	17	25	8	3UTR		0	0
hsa-miR-6750-3p	NM_014917	NTNG1	3550	3570	1	-25.4	0	0.0396409	0.574	1.70337	1.79589	-8.32703	15	20	10	3UTR		0	0
hsa-miR-6754-3p	NM_014917	NTNG1	3713	3768	1	-35	1	0.0091854	0.529	3.30286	1.53323	-4.17062	19	23	15	3UTR		0	0
hsa-miR-6755-3p	NM_014917	NTNG1	5205	5230	1	-19.7	0	0.0581891	0.5	-0.189299	-0.166102	-10.7522	18	25	13	3UTR		0	0
hsa-miR-6757-5p	NM_014917	NTNG1	2561	2602	1	-29.3	1	0.012776	0.485	3.04821	3.61855	-3.93757	20	26	10	3UTR		0	0
hsa-miR-6757-3p	NM_014917	NTNG1	3750	3766	1	-22.8	0	0.00493366	0.5	0.855545	1.53429	-14.1481	14	16	12	3UTR		0	0
hsa-miR-6764-5p	NM_014917	NTNG1	5434	5465	1	-27.6	1	1.11e-07	0.471	-0.239457	-0.310094	-4.17062	15	17	15	3UTR		0	0
hsa-miR-6774-5p	NM_014917	NTNG1	5791	5815	1	-27.1	1	6.18e-06	0.471	-0.0278926	0.0591441	-9.2861	20	24	10	3UTR		0	0
hsa-miR-6776-5p	NM_014917	NTNG1	2220	2237	1	-23.2	0	0.0245019	0.559	0.971597	1.69987	-10.8697	14	17	11	3UTR		0	0
hsa-miR-6777-5p	NM_014917	NTNG1	3988	4011	1	-27.7	1	0.0184708	0.456	0.0883293	0.121561	-7.86061	20	23	14	3UTR		0	0
hsa-miR-6779-5p	NM_014917	NTNG1	5269	5286	1	-25.1	1	0.0408152	0.515	-0.135312	-0.178781	-4.17062	15	17	8	3UTR		0	0
hsa-miR-6781-5p	NM_014917	NTNG1	2480	2503	1	-27.1	0	0.000506711	0.456	1.08859	1.96896	-8.7692	18	23	8	3UTR		0	0
hsa-miR-6787-5p	NM_014917	NTNG1	2697	2734	1	-31.9	1	0.0577428	0.456	2.60913	3.51976	-9.59293	18	23	9	3UTR		0	0
hsa-miR-6788-5p	NM_014917	NTNG1	5254	5286	1	-23.3	1	0.0408152	0.515	-0.232211	-0.195987	-10.3422	17	23	10	3UTR		0	0
hsa-miR-6790-5p	NM_014917	NTNG1	3180	3206	1	-25.6	1	0.000137572	0.574	0.774589	1.59137	-7.51743	20	26	11	3UTR		0	0
hsa-miR-6795-5p	NM_014917	NTNG1	2933	2958	1	-20.1	1	0.0748489	0.632	2.41778	4.08221	-3.79332	17	19	17	3UTR		0	0
hsa-miR-6799-3p	NM_014917	NTNG1	3536	3561	1	-24.4	1	0.00146585	0.529	2.34617	1.76181	-6.87023	16	25	10	3UTR		0	0
hsa-miR-6802-5p	NM_014917	NTNG1	2400	2423	1	-22.7	0	0.00742889	0.544	0.998596	0.828283	-12.6462	16	23	9	3UTR		0	0
hsa-miR-6804-3p	NM_014917	NTNG1	3751	3766	1	-27.7	1	0.00493366	0.5	0.0539347	1.48012	-6.06975	13	15	12	3UTR		0	1
hsa-miR-6804-3p	NM_014917	NTNG1	5548	5564	1	-26.1	0	0.101877	0.485	-0.519592	-0.131689	-9.54656	14	16	11	3UTR		0	1
hsa-miR-6807-3p	NM_014917	NTNG1	3535	3559	1	-26.1	0	0.00108061	0.529	2.05773	1.90059	-7.78982	19	24	9	3UTR		0	0
hsa-miR-6809-3p	NM_014917	NTNG1	4018	4034	1	-28.1	0	4.79e-07	0.515	-0.685361	0.707898	-9.54656	15	16	15	3UTR		0	0
hsa-miR-6810-5p	NM_014917	NTNG1	5907	5936	1	-24.5	1	0.0524616	0.441	-0.41407	-0.171246	-6.24613	18	29	13	3UTR		0	0
hsa-miR-6810-3p	NM_014917	NTNG1	3535	3561	1	-41.2	1	0.00146585	0.529	1.88842	1.80442	-4.957	21	26	12	3UTR		0	0
hsa-miR-6812-3p	NM_014917	NTNG1	3535	3560	1	-27.1	1	0.00195753	0.529	1.52914	1.76668	-6.97192	18	25	6	3UTR		0	0
hsa-miR-6819-5p	NM_014917	NTNG1	6037	6060	1	-27.8	1	0.376651	0.603	0.0941462	0.116193	-5.52986	19	23	9	3UTR		0	0
hsa-miR-6821-3p	NM_014917	NTNG1	3734	3760	1	-22.6	0	0.000809196	0.529	1.30025	1.71062	-7.0874	18	26	9	3UTR		0	0
hsa-miR-6822-3p	NM_014917	NTNG1	3746	3767	1	-24.2	0	0.00525994	0.515	1.13738	1.68194	-13.2314	17	21	10	3UTR		0	0
hsa-miR-6823-3p	NM_014917	NTNG1	5555	5583	1	-24.8	1	0.00742703	0.441	-0.0328436	-0.121727	-4.957	17	28	9	3UTR		0	0
hsa-miR-6826-5p	NM_014917	NTNG1	4131	4185	1	-21.9	1	0.0640083	0.544	0.995755	1.86252	-7.09331	16	22	8	3UTR		0	0
hsa-miR-6828-3p	NM_014917	NTNG1	3535	3560	1	-24.6	1	0.00195753	0.529	1.83079	1.7752	-3.79332	19	25	11	3UTR		0	0
hsa-miR-6833-5p	NM_014917	NTNG1	6026	6047	1	-19.4	0	0.184384	0.632	0.135942	0.133015	-8.74633	17	21	10	3UTR		0	0
hsa-miR-6833-3p	NM_014917	NTNG1	3545	3564	1	-22.2	1	0.0602868	0.559	2.05399	1.83242	-7.28438	17	19	10	3UTR		0	0
hsa-miR-6833-3p	NM_014917	NTNG1	3753	3772	1	-23	0	0.00357041	0.5	-0.0998323	1.5396	-5.69428	17	19	13	3UTR		0	0
hsa-miR-6835-3p	NM_014917	NTNG1	3751	3779	1	-21	0	0.000783571	0.5	0.277706	1.48649	-12.3713	16	28	10	3UTR		1	1
hsa-miR-6780b-5p	NM_014917	NTNG1	5264	5285	1	-23.7	1	0.0313023	0.515	0.0174074	-0.215005	-7.4978	18	21	12	3UTR		0	0
hsa-miR-6837-5p	NM_014917	NTNG1	5902	5921	1	-25.6	1	0.000669893	0.456	-0.460879	-0.212204	-7.10297	16	19	10	3UTR		0	0
hsa-miR-6837-3p	NM_014917	NTNG1	2741	2764	1	-26.3	1	0.00075525	0.5	2.28998	2.44965	-5.03583	19	23	10	3UTR		0	0
hsa-miR-6840-3p	NM_014917	NTNG1	5191	5212	1	-27.7	1	0.00373075	0.529	-0.130784	-0.217722	-8.93173	18	21	10	3UTR		0	0
hsa-miR-6841-5p	NM_014917	NTNG1	5801	5822	1	-23	1	0.000174889	0.456	0.0725532	0.0628012	-5.08246	18	21	8	3UTR		0	0
hsa-miR-6847-3p	NM_014917	NTNG1	2283	2304	1	-23.3	1	0.0355902	0.544	1.45907	2.09326	-6.76235	17	21	11	3UTR		0	0
hsa-miR-6856-3p	NM_014917	NTNG1	5524	5540	1	-19.6	1	0.00906701	0.515	-0.176063	-0.246702	-7.78178	14	16	10	3UTR		0	0
hsa-miR-6858-5p	NM_014917	NTNG1	3978	4012	1	-31.7	1	0.0148696	0.456	0.0928819	0.0514557	-6.28309	18	21	10	3UTR		0	0
hsa-miR-6865-3p	NM_014917	NTNG1	3755	3806	1	-24.9	1	0.00184779	0.559	0.264109	1.61396	-3.93757	21	51	9	3UTR		0	0
hsa-miR-6869-3p	NM_014917	NTNG1	2148	2166	1	-26	0	2.54e-05	0.412	0.0356614	0.705441	-8.70402	15	18	9	3UTR		0	0
hsa-miR-6872-3p	NM_014917	NTNG1	3742	3766	1	-26.6	1	0.00493366	0.5	0.0519114	1.49074	-6.81899	17	24	8	3UTR		0	0
hsa-miR-6873-5p	NM_014917	NTNG1	2947	2966	1	-21.2	0	0.188995	0.632	3.20648	4.03351	-13.2526	17	19	12	3UTR		0	0
hsa-miR-6875-5p	NM_014917	NTNG1	5800	5823	1	-23.3	1	0.000297482	0.456	-0.00197974	0.05695	-4.65016	18	23	8	3UTR		0	0
hsa-miR-6875-3p	NM_014917	NTNG1	5526	5569	1	-26.7	1	0.110169	0.441	-0.167008	-0.170631	-4.76182	16	21	13	3UTR		0	0
hsa-miR-6878-5p	NM_014917	NTNG1	5269	5284	1	-21.8	1	0.0467868	0.529	0.00423484	-0.195987	-5.3155	13	15	11	3UTR		0	0
hsa-miR-6881-5p	NM_014917	NTNG1	5260	5285	1	-24.7	0	0.0313023	0.515	-0.188742	-0.176064	-12.0101	19	25	10	3UTR		0	0
hsa-miR-6882-3p	NM_014917	NTNG1	3734	3761	1	-29	1	0.000687527	0.515	0.870222	1.62458	-4.957	20	27	10	3UTR		0	0
hsa-miR-6885-5p	NM_014917	NTNG1	2463	2488	1	-32.1	0	1.38e-05	0.441	1.17959	1.43226	-5.92733	19	25	9	3UTR		0	0
hsa-miR-6892-3p	NM_014917	NTNG1	3746	3767	1	-27.5	1	0.00525994	0.515	1.43126	1.68406	-9.07598	17	21	8	3UTR		0	0
hsa-miR-6893-3p	NM_014917	NTNG1	3734	3767	1	-27.5	1	0.00525994	0.515	1.47223	1.71912	-4.79441	18	22	10	3UTR		0	0
hsa-miR-6895-3p	NM_014917	NTNG1	5587	5607	1	-23.9	0	1.33e-05	0.515	-0.342092	-0.156141	-13.4023	17	20	12	3UTR		0	0
hsa-miR-7110-5p	NM_014917	NTNG1	5929	5944	1	-24.4	1	0.0273802	0.485	-0.837863	-0.269253	-5.08276	13	15	7	3UTR		0	1
hsa-miR-7110-3p	NM_014917	NTNG1	4010	4034	1	-29.6	0	4.79e-07	0.515	-0.756881	0.536883	-8.31989	17	19	17	3UTR		0	0
hsa-miR-7111-5p	NM_014917	NTNG1	4146	4167	1	-26.3	1	0.00725971	0.574	1.27193	1.91456	-6.32496	16	21	6	3UTR		0	0
hsa-miR-7112-3p	NM_014917	NTNG1	5641	5668	1	-22.7	0	0.00548664	0.574	-0.175057	-0.128067	-9.28323	20	27	9	3UTR		0	0
hsa-miR-7114-5p	NM_014917	NTNG1	5889	5907	1	-25.8	1	0.000453071	0.456	-0.424798	-0.196113	-5.38561	16	18	12	3UTR		0	0
hsa-miR-7150	NM_014917	NTNG1	4145	4164	1	-23.6	1	0.00232521	0.574	1.54507	1.84977	-6.13885	15	19	7	3UTR		0	0
hsa-miR-7151-5p	NM_014917	NTNG1	5673	5693	1	-22.1	1	0.000617482	0.647	-0.142858	0.0357081	-6.98189	16	20	11	3UTR		0	0
hsa-miR-7151-3p	NM_014917	NTNG1	3964	3984	1	-21.5	0	0.00733281	0.529	0.204059	0.103504	-6.51454	15	20	11	3UTR		0	0
hsa-miR-7154-5p	NM_014917	NTNG1	5586	5610	1	-20.4	0	0.00456642	0.529	-0.293793	-0.160669	-9.80241	19	24	8	3UTR		0	0
hsa-miR-7157-3p	NM_014917	NTNG1	2729	2768	1	-20.4	1	0.00236344	0.529	2.55922	2.54704	-5.19005	17	25	7	3UTR		0	0
hsa-miR-7161-3p	NM_014917	NTNG1	5783	5833	1	-24.7	0	0.0093398	0.485	-0.254138	0.0781605	-9.54977	21	26	11	3UTR		0	0
hsa-miR-7847-3p	NM_014917	NTNG1	2584	2613	1	-23.5	1	0.12215	0.5	1.96911	4.19868	-8.3038	17	29	9	3UTR		0	0
hsa-miR-7847-3p	NM_014917	NTNG1	6033	6054	1	-22.7	1	0.313845	0.618	-0.0176525	0.0935199	-6.09222	16	21	7	3UTR		0	0
hsa-miR-7849-3p	NM_014917	NTNG1	3686	3712	1	-18.9	1	0.026918	0.632	2.52108	2.19035	-3.93757	20	26	9	3UTR		0	0
hsa-miR-7850-5p	NM_014917	NTNG1	3816	3837	1	-24	0	7.41e-06	0.544	0.563792	0.774817	-8.76019	18	21	12	3UTR		0	0
hsa-miR-7978	NM_014917	NTNG1	4249	4271	1	-19.8	1	8.56e-06	0.603	1.3387	1.84021	-9.63999	15	22	7	3UTR		0	0
hsa-miR-8053	NM_014917	NTNG1	4257	4278	1	-20.8	0	0.000135473	0.588	1.3387	1.87632	-9.34574	17	21	7	3UTR		0	0
hsa-miR-8055	NM_014917	NTNG1	4490	4511	1	-22.5	0	0.00471138	0.529	0.645228	1.42807	-10.603	17	21	14	3UTR		0	0
hsa-miR-8057	NM_014917	NTNG1	2372	2383	1	-17.7	0	0.000409681	0.529	2.4691	1.20704	-8.33988	10	11	10	3UTR		0	0
hsa-miR-8057	NM_014917	NTNG1	4791	4809	1	-17.3	1	0.000200668	0.588	0.240517	0.958666	-6.28309	15	18	8	3UTR		0	0
hsa-miR-8071	NM_014917	NTNG1	2221	2242	1	-22.6	0	0.017992	0.544	0.695831	1.77153	-6.85796	16	21	9	3UTR		0	0
hsa-miR-8077	NM_014917	NTNG1	5822	5844	1	-26.6	0	0.000199133	0.529	0.399244	0.0137976	-6.62614	18	22	8	3UTR		0	0
hsa-miR-8077	NM_014917	NTNG1	2215	2233	1	-24.8	1	0.233559	0.559	0.667418	1.76861	-6.24613	14	18	10	3UTR		0	0
hsa-miR-8085	NM_014917	NTNG1	5258	5285	1	-25	1	0.0313023	0.515	-0.232211	-0.195987	-10.3422	17	19	17	3UTR		0	0
hsa-miR-8085	NM_014917	NTNG1	5897	5919	1	-21	0	0.000898817	0.456	0.472384	-0.158812	-10.8697	16	22	8	3UTR		0	0
hsa-let-7a-5p	XM_017000680	NTNG1	4194	4207	1	-16.7	0	0.00222982	0.456	0	0	-8.03672	11	13	9	3UTR		0	0
hsa-let-7a-2-3p	XM_017000680	NTNG1	5782	5812	1	-26.8	0	1.66e-05	0.529	0	0	-8.30604	18	22	12	3UTR		0	0
hsa-let-7d-5p	XM_017000680	NTNG1	4352	4372	1	-22.3	0	0.0161645	0.559	0	0	-7.75139	16	20	6	3UTR		0	0
hsa-let-7d-3p	XM_017000680	NTNG1	3749	3764	1	-22.6	0	0.00195753	0.529	0	0	-20.1593	13	15	7	3UTR		0	0
hsa-let-7e-3p	XM_017000680	NTNG1	5765	5812	1	-24.8	0	1.66e-05	0.529	0	0	-8.31989	18	22	13	3UTR		0	0
hsa-miR-17-3p	XM_017000680	NTNG1	4043	4065	1	-19.8	0	0.0147669	0.603	0	0	-14.1648	16	22	10	3UTR		0	0
hsa-miR-18a-5p	XM_017000680	NTNG1	5988	6028	1	-24.3	0	0.000190288	0.471	0	0	-6.57398	19	22	11	3UTR		0	0
hsa-miR-18a-5p	XM_017000680	NTNG1	4674	4695	1	-21	1	0.0058764	0.544	0	0	-6.08354	18	21	12	3UTR		0	0
hsa-miR-22-3p	XM_017000680	NTNG1	6106	6130	1	-19.5	1	0.00166211	0.441	0	0	-4.76182	18	24	14	3UTR		1	0
hsa-miR-23a-5p	XM_017000680	NTNG1	5483	5503	1	-25.5	1	0.0102982	0.485	0	0	-9.2861	15	20	10	3UTR		0	0
hsa-miR-24-3p	XM_017000680	NTNG1	3413	3436	1	-24.6	1	7.57e-05	0.588	0	0	-4.957	20	23	10	3UTR		0	0
hsa-miR-25-5p	XM_017000680	NTNG1	3889	3923	1	-23.8	1	0.0140484	0.588	0	0	-3.93757	17	34	10	3UTR		0	0
hsa-miR-25-3p	XM_017000680	NTNG1	2946	2967	1	-22.2	1	0.000388183	0.515	0	0	-9.54631	17	21	7	3UTR		0	0
hsa-miR-26a-1-3p	XM_017000680	NTNG1	3939	3962	1	-19.9	0	0.000224648	0.529	0	0	-11.9403	18	23	8	3UTR		0	0
hsa-miR-33a-3p	XM_017000680	NTNG1	6171	6204	1	-25.9	0	0.0160561	0.618	0	0	-9.33931	16	19	9	3UTR		0	1
hsa-miR-29b-1-5p	XM_017000680	NTNG1	2766	2795	1	-20.9	0	0.000100753	0.5	0	0	-8.86514	18	22	12	3UTR		0	0
hsa-miR-103a-3p	XM_017000680	NTNG1	6111	6136	1	-23.8	0	0.0266954	0.441	0	0	-6.51454	20	25	10	3UTR		0	0
hsa-miR-105-5p	XM_017000680	NTNG1	4565	4582	1	-18.6	0	0.040511	0.691	0	0	-17.1102	13	17	11	3UTR		0	0
hsa-miR-107	XM_017000680	NTNG1	6116	6136	1	-23.7	0	0.0266954	0.441	0	0	-6.51454	17	20	10	3UTR		0	0
hsa-miR-208a-5p	XM_017000680	NTNG1	5843	5874	1	-21.5	1	0.00113561	0.588	0	0	-3.93757	17	31	9	3UTR		0	0
hsa-miR-129-1-3p	XM_017000680	NTNG1	5115	5133	1	-17.8	1	0.000139527	0.544	0	0	-5.9255	12	18	8	3UTR		0	0
hsa-miR-148a-3p	XM_017000680	NTNG1	3393	3434	1	-18.9	0	6.74e-05	0.588	0	0	-7.08104	14	17	9	3UTR		0	0
hsa-miR-139-5p	XM_017000680	NTNG1	5662	5689	1	-24.1	1	0.00190405	0.485	0	0	-7.00542	18	21	9	3UTR		0	0
hsa-miR-181b-5p	XM_017000680	NTNG1	2483	2498	1	-20.2	0	0.00867054	0.588	0	0	-20.4803	13	15	7	3UTR		0	0
hsa-miR-183-3p	XM_017000680	NTNG1	5958	5981	1	-18.7	0	0.00404903	0.5	0	0	-5.83853	17	23	6	3UTR		0	0
hsa-miR-203a-3p	XM_017000680	NTNG1	5655	5683	1	-19.2	0	0.00043796	0.471	0	0	-10.4313	17	22	12	3UTR		0	0
hsa-miR-205-3p	XM_017000680	NTNG1	3380	3422	1	-19.9	0	0.286166	0.544	0	0	-8.76019	16	20	14	3UTR		0	0
hsa-miR-210-5p	XM_017000680	NTNG1	2705	2758	1	-25.2	1	0.000479282	0.588	0	0	-7.14013	20	53	10	3UTR		0	0
hsa-miR-210-3p	XM_017000680	NTNG1	5522	5541	1	-23.7	1	0.406768	0.441	0	0	-9.2861	14	19	10	3UTR		0	0
hsa-miR-211-5p	XM_017000680	NTNG1	5615	5638	1	-26.3	1	9.02e-05	0.426	0	0	-4.957	19	23	10	3UTR		0	0
hsa-miR-211-3p	XM_017000680	NTNG1	2701	2749	1	-24.5	0	1.57e-05	0.559	0	0	-11.8241	18	23	15	3UTR		0	0
hsa-miR-214-3p	XM_017000680	NTNG1	2776	2796	1	-24.8	1	0.00248312	0.515	0	0	-8.02485	16	20	10	3UTR		0	0
hsa-miR-216a-3p	XM_017000680	NTNG1	5656	5688	1	-22	1	0.00159315	0.485	0	0	-5.18008	16	21	9	3UTR		0	0
hsa-miR-221-3p	XM_017000680	NTNG1	2421	2445	1	-21.3	0	0.0155726	0.544	0	0	-7.24999	15	19	11	3UTR		0	0
hsa-miR-223-5p	XM_017000680	NTNG1	2732	2751	1	-18.9	1	2.37e-05	0.559	0	0	-5.08246	17	19	14	3UTR		0	0
hsa-miR-200b-5p	XM_017000680	NTNG1	3861	3901	1	-23.8	0	0.00445843	0.662	0	0	-9.69585	16	18	16	3UTR		0	0
hsa-miR-200b-3p	XM_017000680	NTNG1	2552	2584	1	-19.6	0	0.000198018	0.559	0	0	-13.6656	16	20	12	3UTR		0	0
hsa-miR-15b-5p	XM_017000680	NTNG1	4345	4362	1	-18.9	1	0.000542431	0.529	0	0	-13.2745	15	17	11	3UTR		0	0
hsa-miR-23b-3p	XM_017000680	NTNG1	4899	4918	1	-20.2	1	0.00234103	0.706	0	0	-3.93757	16	19	10	3UTR		0	0
hsa-miR-125b-1-3p	XM_017000680	NTNG1	2775	2801	1	-23.7	0	0.00369268	0.515	0	0	-7.9845	18	26	6	3UTR		0	0
hsa-miR-138-5p	XM_017000680	NTNG1	4708	4730	1	-22.8	1	0.000848085	0.544	0	0	-5.9255	17	22	9	3UTR		0	0
hsa-miR-141-3p	XM_017000680	NTNG1	2428	2444	1	-17.9	1	0.0149896	0.544	0	0	-5.9255	12	15	10	3UTR		0	0
hsa-miR-153-5p	XM_017000680	NTNG1	2603	2633	1	-19.3	0	0.0537012	0.559	0	0	-11.6667	19	30	10	3UTR		0	0
hsa-miR-125a-5p	XM_017000680	NTNG1	3748	3766	1	-20.8	0	0.00155467	0.544	0	0	-9.81978	15	18	9	3UTR		0	0
hsa-miR-125b-2-3p	XM_017000680	NTNG1	5660	5679	1	-22.9	0	0.000905153	0.485	0	0	-8.40165	15	19	9	3UTR		0	0
hsa-miR-127-3p	XM_017000680	NTNG1	2339	2358	1	-22.8	0	1.19e-05	0.382	0	0	-10.1659	16	19	11	3UTR		0	0
hsa-miR-129-2-3p	XM_017000680	NTNG1	5115	5133	1	-17.8	1	0.000139527	0.544	0	0	-5.9255	12	18	8	3UTR		0	0
hsa-miR-138-1-3p	XM_017000680	NTNG1	5658	5678	1	-25	1	0.000709122	0.485	0	0	-13.2279	16	20	9	3UTR		0	0
hsa-miR-150-5p	XM_017000680	NTNG1	4213	4237	1	-23	0	1.82e-07	0.5	0	0	-8.02794	17	24	6	3UTR		0	0
hsa-miR-150-3p	XM_017000680	NTNG1	2346	2365	1	-28	1	1.3e-05	0.382	0	0	-4.76182	15	19	13	3UTR		0	0
hsa-miR-188-3p	XM_017000680	NTNG1	5359	5381	1	-20.2	0	0.000107103	0.574	0	0	-8.02599	16	22	11	3UTR		0	0
hsa-miR-193a-5p	XM_017000680	NTNG1	5443	5462	1	-24	1	0.00197773	0.485	0	0	-8.00486	16	19	9	3UTR		0	0
hsa-miR-320a	XM_017000680	NTNG1	2807	2828	1	-21.6	1	0.0322954	0.485	0	0	-4.65016	19	21	14	3UTR		0	0
hsa-miR-128-2-5p	XM_017000680	NTNG1	2431	2461	1	-21.5	0	0.0837291	0.544	0	0	-8.32703	16	30	8	3UTR		0	0
hsa-miR-194-3p	XM_017000680	NTNG1	4055	4075	1	-24.9	0	0.00703663	0.588	0	0	-8.05661	17	20	10	3UTR		0	0
hsa-miR-106b-3p	XM_017000680	NTNG1	2945	2966	1	-23.9	1	0.000100961	0.515	0	0	-10.0219	16	21	9	3UTR		0	0
hsa-miR-30c-1-3p	XM_017000680	NTNG1	5437	5490	1	-24.1	1	0.0408152	0.515	0	0	-4.90607	14	16	14	3UTR		0	0
hsa-miR-200a-3p	XM_017000680	NTNG1	3092	3113	1	-21.5	0	0.00259119	0.676	0	0	-5.83853	17	21	12	3UTR		0	0
hsa-miR-200a-3p	XM_017000680	NTNG1	2422	2444	1	-17.9	1	0.0149896	0.544	0	0	-5.9255	12	15	10	3UTR		0	0
hsa-miR-302a-3p	XM_017000680	NTNG1	2481	2499	1	-20.8	0	0.00852985	0.574	0	0	-7.48304	16	18	11	3UTR		0	0
hsa-miR-299-3p	XM_017000680	NTNG1	4362	4376	1	-17.6	1	0.0529081	0.559	0	0	-5.81821	12	14	7	3UTR		0	0
hsa-miR-363-5p	XM_017000680	NTNG1	4907	4924	1	-19.1	1	0.00658544	0.691	0	0	-4.65016	15	17	12	3UTR		0	0
hsa-miR-365a-5p	XM_017000680	NTNG1	6095	6124	1	-24.4	0	0.000495396	0.456	0	0	-10.3702	20	29	11	3UTR		0	0
hsa-miR-365b-5p	XM_017000680	NTNG1	6016	6040	1	-27.5	1	0.028751	0.485	0	0	-3.93757	19	24	10	3UTR		0	0
hsa-miR-302c-3p	XM_017000680	NTNG1	4211	4231	1	-20	0	2.73e-05	0.471	0	0	-14.7943	17	20	11	3UTR		0	0
hsa-miR-367-5p	XM_017000680	NTNG1	4030	4065	1	-21.6	1	0.0147669	0.603	0	0	-3.79332	15	17	15	3UTR		0	0
hsa-miR-369-5p	XM_017000680	NTNG1	5993	6012	1	-17.5	1	1.97e-05	0.485	0	0	-4.90607	14	19	9	3UTR		0	0
hsa-miR-377-5p	XM_017000680	NTNG1	3477	3501	1	-20.7	1	0.00497892	0.603	0	0	-6.76235	19	24	9	3UTR		0	0
hsa-miR-378a-3p	XM_017000680	NTNG1	5458	5479	1	-23.6	0	0.00478103	0.515	0	0	-8.70704	17	21	10	3UTR		0	0
hsa-miR-330-5p	XM_017000680	NTNG1	5397	5417	1	-23.9	1	0.00392923	0.544	0	0	-5.22701	18	20	14	3UTR		0	0
hsa-miR-330-5p	XM_017000680	NTNG1	5101	5121	1	-22.9	1	0.00324593	0.574	0	0	-6.9638	18	20	12	3UTR		0	0
hsa-miR-342-3p	XM_017000680	NTNG1	5634	5651	1	-24.6	1	0.000159623	0.382	0	0	-11.1852	15	17	9	3UTR		0	0
hsa-miR-342-3p	XM_017000680	NTNG1	3414	3429	1	-19.8	1	0.000552635	0.603	0	0	-4.957	14	15	14	3UTR		0	0
hsa-miR-135b-5p	XM_017000680	NTNG1	5116	5129	1	-18.1	0	0.00342652	0.544	0	0	-9.54656	12	13	12	3UTR		1	1
hsa-miR-135b-3p	XM_017000680	NTNG1	5198	5221	1	-21.1	1	0.0020456	0.662	0	0	-7.28438	18	23	11	3UTR		0	0
hsa-miR-148b-3p	XM_017000680	NTNG1	6177	6197	1	-20.1	1	0.0430588	0.559	0	0	-6.76235	18	20	15	3UTR		0	0
hsa-miR-148b-3p	XM_017000680	NTNG1	3412	3434	1	-18.9	0	6.74e-05	0.588	0	0	-6.89492	14	17	9	3UTR		0	0
hsa-miR-148b-3p	XM_017000680	NTNG1	2875	2892	1	-16.9	0	0.0284496	0.574	0	0	-8.66051	14	17	9	3UTR		0	0
hsa-miR-331-3p	XM_017000680	NTNG1	5622	5670	1	-30.5	0	3.57e-08	0.485	0	0	-5.83853	15	19	6	3UTR		0	0
hsa-miR-324-3p	XM_017000680	NTNG1	5987	6006	1	-25.1	0	0.000317523	0.5	0	0	-6.51454	16	19	10	3UTR		0	0
hsa-miR-339-3p	XM_017000680	NTNG1	4708	4729	1	-25.7	0	0.00128142	0.559	0	0	-13.4406	18	21	12	3UTR		0	0
hsa-miR-345-5p	XM_017000680	NTNG1	5658	5677	1	-25.7	0	0.00052424	0.471	0	0	-13.6138	15	19	9	3UTR		0	0
hsa-miR-345-5p	XM_017000680	NTNG1	5612	5632	1	-25.5	0	7.51e-06	0.471	0	0	-9.79437	16	20	9	3UTR		0	0
hsa-miR-346	XM_017000680	NTNG1	3953	3975	1	-26.1	0	0.232624	0.5	0	0	-10.2048	18	22	10	3UTR		0	0
hsa-miR-18b-5p	XM_017000680	NTNG1	6009	6028	1	-20.8	0	0.000190288	0.471	0	0	-6.57398	17	19	11	3UTR		0	0
hsa-miR-18b-3p	XM_017000680	NTNG1	3950	3971	1	-22.8	0	0.00525994	0.515	0	0	-9.18387	16	21	5	3UTR		0	0
hsa-miR-20b-3p	XM_017000680	NTNG1	4344	4362	1	-20.7	0	0.000542431	0.529	0	0	-6.74759	14	18	12	3UTR		0	0
hsa-miR-429	XM_017000680	NTNG1	2430	2444	1	-15.9	1	0.0149896	0.544	0	0	-5.9255	12	14	10	3UTR		0	0
hsa-miR-450a-1-3p	XM_017000680	NTNG1	3979	4025	1	-17.7	1	0.0173168	0.574	0	0	-12.4965	13	19	8	3UTR		0	0
hsa-miR-433-5p	XM_017000680	NTNG1	4524	4541	1	-21.1	0	0.00472757	0.706	0	0	-8.33988	10	12	10	3UTR		0	0
hsa-miR-433-3p	XM_017000680	NTNG1	6011	6036	1	-22	0	0.00296355	0.485	0	0	-8.25873	19	25	8	3UTR		0	0
hsa-miR-329-5p	XM_017000680	NTNG1	5493	5513	1	-21.4	0	0.00055247	0.471	0	0	-9.81332	16	20	13	3UTR		0	0
hsa-miR-412-3p	XM_017000680	NTNG1	5791	5807	1	-22.8	0	2.38e-05	0.5	0	0	-17.8457	14	16	13	3UTR		0	0
hsa-miR-483-5p	XM_017000680	NTNG1	3154	3174	1	-20.9	1	0.00727455	0.632	0	0	-5.41313	18	20	9	3UTR		0	0
hsa-miR-483-3p	XM_017000680	NTNG1	3749	3776	1	-22.2	1	0.0300814	0.574	0	0	-6.76235	19	27	6	3UTR		0	0
hsa-miR-486-3p	XM_017000680	NTNG1	4351	4370	1	-26.9	1	0.00353243	0.574	0	0	-6.09222	16	19	9	3UTR		0	0
hsa-miR-487a-5p	XM_017000680	NTNG1	3956	3978	1	-22.3	0	0.000174417	0.5	0	0	-6.50069	17	22	6	3UTR		0	0
hsa-miR-490-3p	XM_017000680	NTNG1	5940	5973	1	-34.4	1	0.000119166	0.559	0	0	-4.957	19	23	16	3UTR		0	0
hsa-miR-146b-3p	XM_017000680	NTNG1	2946	2970	1	-24.9	0	0.00155536	0.5	0	0	-7.38222	18	24	10	3UTR		0	0
hsa-miR-146b-3p	XM_017000680	NTNG1	5109	5134	1	-21.8	0	0.000420006	0.559	0	0	-10.9622	17	25	10	3UTR		0	0
hsa-miR-432-5p	XM_017000680	NTNG1	2700	2721	1	-21.7	0	0.000676335	0.456	0	0	-12.9282	17	21	11	3UTR		0	0
hsa-miR-494-5p	XM_017000680	NTNG1	3953	3979	1	-22.7	0	0.000186434	0.485	0	0	-10.4278	20	26	11	3UTR		0	0
hsa-miR-193b-5p	XM_017000680	NTNG1	2685	2704	1	-20.6	1	0.000683248	0.441	0	0	-8.55011	13	19	7	3UTR		0	0
hsa-miR-512-5p	XM_017000680	NTNG1	5657	5678	1	-22.8	0	0.000709122	0.485	0	0	-9.18534	17	21	12	3UTR		0	0
hsa-miR-512-5p	XM_017000680	NTNG1	6015	6047	1	-22.1	0	0.000185172	0.529	0	0	-6.51454	19	32	14	3UTR		0	0
hsa-miR-520f-3p	XM_017000680	NTNG1	2904	2924	1	-21.3	0	0.0230435	0.515	0	0	-7.98902	17	20	11	3UTR		0	0
hsa-miR-519c-5p	XM_017000680	NTNG1	6090	6128	1	-19.7	0	0.000982227	0.456	0	0	-13.0295	16	38	9	3UTR		0	0
hsa-miR-519c-3p	XM_017000680	NTNG1	4653	4694	1	-21.6	1	0.00139902	0.559	0	0	-3.93757	20	23	13	3UTR		0	0
hsa-miR-520a-3p	XM_017000680	NTNG1	3947	3964	1	-22.2	0	0.000809196	0.529	0	0	-9.54656	16	17	16	3UTR		0	0
hsa-miR-519b-5p	XM_017000680	NTNG1	6090	6128	1	-19.7	0	0.000982227	0.456	0	0	-13.0295	16	38	9	3UTR		0	0
hsa-miR-525-5p	XM_017000680	NTNG1	5633	5652	1	-23.6	0	0.000121432	0.397	0	0	-8.00792	16	19	11	3UTR		0	0
hsa-miR-525-5p	XM_017000680	NTNG1	5556	5572	1	-21.7	1	1.91e-09	0.471	0	0	-10.8446	14	16	10	3UTR		0	0
hsa-miR-523-5p	XM_017000680	NTNG1	6090	6128	1	-19.7	0	0.000982227	0.456	0	0	-13.0295	16	38	9	3UTR		0	0
hsa-miR-520b	XM_017000680	NTNG1	2904	2924	1	-20.7	0	0.0230435	0.515	0	0	-10.6336	17	20	11	3UTR		0	0
hsa-miR-520c-3p	XM_017000680	NTNG1	5561	5591	1	-20.8	0	0.00160394	0.456	0	0	-9.54656	17	30	10	3UTR		0	0
hsa-miR-517a-3p	XM_017000680	NTNG1	6294	6316	1	-23.5	0	0.00184793	0.574	0	0	-10.6336	18	22	10	3UTR		0	0
hsa-miR-517b-3p	XM_017000680	NTNG1	6294	6316	1	-23.5	0	0.00184793	0.574	0	0	-10.6336	18	22	10	3UTR		0	0
hsa-miR-520g-3p	XM_017000680	NTNG1	6294	6317	1	-20.8	0	0.0020231	0.574	0	0	-12.3328	18	23	10	3UTR		0	0
hsa-miR-516b-3p	XM_017000680	NTNG1	5561	5591	1	-22.9	1	0.00160394	0.456	0	0	-3.93757	17	30	10	3UTR		0	0
hsa-miR-518e-5p	XM_017000680	NTNG1	6090	6128	1	-19.7	0	0.000982227	0.456	0	0	-13.0295	16	38	9	3UTR		0	0
hsa-miR-518e-3p	XM_017000680	NTNG1	6295	6317	1	-20.9	0	0.0020231	0.574	0	0	-11.3897	17	22	9	3UTR		0	0
hsa-miR-517c-3p	XM_017000680	NTNG1	6294	6316	1	-21.8	0	0.00184793	0.574	0	0	-10.6336	18	22	10	3UTR		0	0
hsa-miR-522-5p	XM_017000680	NTNG1	6090	6128	1	-19.7	0	0.000982227	0.456	0	0	-13.0295	16	38	9	3UTR		0	0
hsa-miR-519a-5p	XM_017000680	NTNG1	6090	6128	1	-19.7	0	0.000982227	0.456	0	0	-13.0295	16	38	9	3UTR		0	0
hsa-miR-516a-3p	XM_017000680	NTNG1	5561	5591	1	-22.9	1	0.00160394	0.456	0	0	-3.93757	17	30	10	3UTR		0	0
hsa-miR-500a-3p	XM_017000680	NTNG1	2705	2751	1	-24.5	1	2.37e-05	0.559	0	0	-3.93757	17	21	9	3UTR		0	0
hsa-miR-502-3p	XM_017000680	NTNG1	2712	2752	1	-26	1	2.9e-05	0.544	0	0	-3.93757	18	22	10	3UTR		0	1
hsa-miR-502-3p	XM_017000680	NTNG1	3884	3903	1	-21.1	1	0.00538332	0.662	0	0	-5.81384	16	19	7	3UTR		0	1
hsa-miR-503-5p	XM_017000680	NTNG1	2577	2610	1	-21.7	0	0.000326367	0.5	0	0	-15.7411	16	33	9	3UTR		0	0
hsa-miR-508-5p	XM_017000680	NTNG1	5634	5678	1	-23.8	1	0.000709122	0.485	0	0	-4.79441	19	44	8	3UTR		0	0
hsa-miR-514a-5p	XM_017000680	NTNG1	5042	5065	1	-19.8	0	0.0276868	0.618	0	0	-9.54656	17	23	13	3UTR		0	0
hsa-miR-532-5p	XM_017000680	NTNG1	5152	5173	1	-20.1	0	0.0287643	0.676	0	0	-8.93978	17	21	11	3UTR		0	0
hsa-miR-455-3p	XM_017000680	NTNG1	2484	2497	1	-19.9	0	0.0124688	0.574	0	0	-8.60958	11	13	9	3UTR		0	0
hsa-miR-487b-3p	XM_017000680	NTNG1	6307	6321	1	-21	0	0.00584583	0.588	0	0	-10.8357	13	14	13	3UTR		0	0
hsa-miR-551a	XM_017000680	NTNG1	3742	3761	1	-24.8	0	0.00189521	0.529	0	0	-11.8972	16	19	11	3UTR		0	0
hsa-miR-552-3p	XM_017000680	NTNG1	2892	2938	1	-19.8	1	0.0577428	0.456	0	0	-4.02637	14	20	9	3UTR		0	0
hsa-miR-92b-5p	XM_017000680	NTNG1	2783	2805	1	-28.1	1	0.00639343	0.5	0	0	-6.9954	19	22	14	3UTR		0	0
hsa-miR-92b-3p	XM_017000680	NTNG1	5791	5811	1	-22.7	0	1.33e-05	0.515	0	0	-9.65801	16	20	10	3UTR		0	0
hsa-miR-555	XM_017000680	NTNG1	6084	6124	1	-21.6	0	0.000495396	0.456	0	0	-6.80703	13	16	8	3UTR		0	0
hsa-miR-555	XM_017000680	NTNG1	5309	5327	1	-20.8	0	0.00375399	0.721	0	0	-5.69428	16	18	14	3UTR		0	0
hsa-miR-570-5p	XM_017000680	NTNG1	2598	2617	1	-22.7	0	5.42e-06	0.544	0	0	-10.3719	16	19	13	3UTR		0	0
hsa-miR-571	XM_017000680	NTNG1	4462	4486	1	-21.3	0	7.66e-05	0.588	0	0	-5.72816	16	19	10	3UTR		0	0
hsa-miR-573	XM_017000680	NTNG1	3374	3414	1	-19.2	1	0.00152963	0.559	0	0	-4.65016	17	21	8	3UTR		0	0
hsa-miR-574-5p	XM_017000680	NTNG1	2399	2421	1	-23.3	0	0.276025	0.574	0	0	-6.74759	17	22	12	3UTR		0	0
hsa-miR-578	XM_017000680	NTNG1	5591	5628	1	-23	1	8.16e-07	0.485	0	0	-6.76235	20	24	15	3UTR		0	0
hsa-miR-581	XM_017000680	NTNG1	3732	3754	1	-18.7	0	3.03e-07	0.515	0	0	-6.07158	14	16	14	3UTR		0	0
hsa-miR-582-5p	XM_017000680	NTNG1	6159	6211	1	-27	1	0.000646085	0.632	0	0	-6.08354	17	21	12	3UTR		0	0
hsa-miR-585-3p	XM_017000680	NTNG1	2666	2691	1	-21.4	1	2e-05	0.441	0	0	-11.254	15	17	15	3UTR		0	0
hsa-miR-548a-3p	XM_017000680	NTNG1	3541	3586	1	-16.8	0	0.0186875	0.706	0	0	-15.5666	12	14	12	3UTR		0	0
hsa-miR-588	XM_017000680	NTNG1	4463	4483	1	-19.3	1	5.79e-05	0.588	0	0	-8.06181	11	15	8	3UTR		0	0
hsa-miR-589-3p	XM_017000680	NTNG1	5795	5820	1	-21.4	0	0.0173421	0.5	0	0	-16.9706	16	25	9	3UTR		0	0
hsa-miR-591	XM_017000680	NTNG1	6128	6165	1	-20.9	1	1.37e-05	0.544	0	0	-5.76291	13	15	13	3UTR		0	0
hsa-miR-595	XM_017000680	NTNG1	4728	4751	1	-22.4	1	0.0547174	0.588	0	0	-6.03692	17	23	9	3UTR		0	0
hsa-miR-598-5p	XM_017000680	NTNG1	5988	6014	1	-22.4	1	2.72e-06	0.485	0	0	-5.52986	19	26	9	3UTR		0	0
hsa-miR-601	XM_017000680	NTNG1	5469	5492	1	-24.4	0	0.113199	0.529	0	0	-12.6723	17	23	10	3UTR		0	0
hsa-miR-611	XM_017000680	NTNG1	5422	5449	1	-27.6	0	0.000141634	0.5	0	0	-7.07355	18	27	6	3UTR		0	0
hsa-miR-615-5p	XM_017000680	NTNG1	5790	5805	1	-26.4	0	3.23e-05	0.485	0	0	-7.37138	14	15	14	3UTR		0	0
hsa-miR-615-3p	XM_017000680	NTNG1	5433	5454	1	-25.1	0	3.2e-05	0.515	0	0	-9.60059	18	21	12	3UTR		0	0
hsa-miR-618	XM_017000680	NTNG1	3950	3971	1	-20.5	0	0.00525994	0.515	0	0	-6.51454	18	21	11	3UTR		0	0
hsa-miR-619-5p	XM_017000680	NTNG1	4344	4366	1	-23	0	0.0016182	0.544	0	0	-9.70971	17	22	9	3UTR		0	0
hsa-miR-621	XM_017000680	NTNG1	4343	4363	1	-22.8	0	0.000852336	0.544	0	0	-10.5724	18	20	12	3UTR		0	0
hsa-miR-624-5p	XM_017000680	NTNG1	2752	2775	1	-18.2	0	0.0388422	0.485	0	0	-10.9252	17	23	11	3UTR		0	0
hsa-miR-627-3p	XM_017000680	NTNG1	4102	4115	1	-17.3	0	0.000768367	0.632	0	0	-13.6656	12	13	12	3UTR		0	0
hsa-miR-629-3p	XM_017000680	NTNG1	6166	6203	1	-19.9	1	0.0176715	0.603	0	0	-8.97335	16	21	9	3UTR		0	0
hsa-miR-33b-3p	XM_017000680	NTNG1	6001	6023	1	-27.6	1	0.000271442	0.471	0	0	-5.9255	17	22	7	3UTR		0	0
hsa-miR-637	XM_017000680	NTNG1	2578	2620	1	-28.9	0	1.45e-05	0.559	0	0	-10.0748	18	42	8	3UTR		0	0
hsa-miR-642a-5p	XM_017000680	NTNG1	3728	3766	1	-23.2	1	0.00155467	0.544	0	0	-11.254	18	38	9	3UTR		0	0
hsa-miR-644a	XM_017000680	NTNG1	2448	2465	1	-20.5	0	0.0254706	0.544	0	0	-11.0886	14	17	11	3UTR		0	0
hsa-miR-650	XM_017000680	NTNG1	3861	3894	1	-26	0	0.0642769	0.632	0	0	-9.54656	16	33	8	3UTR		0	0
hsa-miR-652-5p	XM_017000680	NTNG1	5557	5575	1	-26.5	1	4.53e-10	0.471	0	0	-7.39609	16	18	10	3UTR		0	0
hsa-miR-654-5p	XM_017000680	NTNG1	6105	6123	1	-22.1	0	0.000898817	0.456	0	0	-12.8934	15	18	8	3UTR		0	0
hsa-miR-658	XM_017000680	NTNG1	2786	2805	1	-26.8	0	0.00639343	0.5	0	0	-7.0388	17	19	12	3UTR		0	0
hsa-miR-659-3p	XM_017000680	NTNG1	5437	5462	1	-25.1	1	0.00197773	0.485	0	0	-8.3038	18	25	9	3UTR		0	0
hsa-miR-758-3p	XM_017000680	NTNG1	6077	6093	1	-18	0	0.00528453	0.471	0	0	-8.49178	13	16	8	3UTR		0	0
hsa-miR-671-3p	XM_017000680	NTNG1	5658	5675	1	-25.2	0	2.64e-05	0.485	0	0	-5.83853	15	17	10	3UTR		0	0
hsa-miR-668-3p	XM_017000680	NTNG1	5614	5633	1	-22.6	1	8.09e-06	0.456	0	0	-8.38244	15	19	8	3UTR		0	0
hsa-miR-668-3p	XM_017000680	NTNG1	4460	4480	1	-21.2	1	3.12e-05	0.574	0	0	-7.14013	15	20	7	3UTR		0	0
hsa-miR-767-5p	XM_017000680	NTNG1	3485	3504	1	-22	0	0.0105425	0.632	0	0	-13.8149	16	19	12	3UTR		0	0
hsa-miR-1224-3p	XM_017000680	NTNG1	3954	3971	1	-28.3	1	0.00525994	0.515	0	0	-4.17062	15	17	8	3UTR		0	0
hsa-miR-1301-5p	XM_017000680	NTNG1	5662	5678	1	-23.7	1	0.000709122	0.485	0	0	-7.61919	15	16	15	3UTR		0	0
hsa-miR-1185-2-3p	XM_017000680	NTNG1	2923	2942	1	-21.5	1	0.0681694	0.471	0	0	-8.57351	15	19	11	3UTR		0	0
hsa-miR-449c-3p	XM_017000680	NTNG1	3947	3972	1	-24.4	0	0.0091854	0.529	0	0	-10.3856	20	25	11	3UTR		0	0
hsa-miR-449c-3p	XM_017000680	NTNG1	2529	2565	1	-21.4	1	0.0292107	0.544	0	0	-3.93757	19	36	8	3UTR		0	0
hsa-miR-766-3p	XM_017000680	NTNG1	5642	5677	1	-29	1	0.00052424	0.471	0	0	-6.08354	16	21	6	3UTR		0	0
hsa-miR-378d	XM_017000680	NTNG1	5461	5479	1	-21.9	0	0.00478103	0.515	0	0	-8.70704	15	18	10	3UTR		0	0
hsa-miR-378d	XM_017000680	NTNG1	6098	6116	1	-21.8	1	0.000743983	0.426	0	0	-4.65016	16	18	9	3UTR		0	0
hsa-miR-670-5p	XM_017000680	NTNG1	4716	4739	1	-21	1	0.00175007	0.529	0	0	-5.22671	17	23	14	3UTR		0	0
hsa-miR-670-5p	XM_017000680	NTNG1	3663	3683	1	-19.8	1	0.000385429	0.618	0	0	-6.76235	18	20	12	3UTR		0	0
hsa-miR-2113	XM_017000680	NTNG1	5793	5813	1	-21.1	1	2.34e-05	0.529	0	0	-4.84971	17	20	14	3UTR		0	0
hsa-miR-761	XM_017000680	NTNG1	4192	4206	1	-26.4	1	0.00196423	0.471	0	0	-5.76291	13	14	13	3UTR		0	0
hsa-miR-764	XM_017000680	NTNG1	3955	3983	1	-25.4	0	0.000783571	0.5	0	0	-5.71431	20	28	14	3UTR		0	0
hsa-miR-675-3p	XM_017000680	NTNG1	5791	5812	1	-23	1	1.66e-05	0.529	0	0	-5.02746	17	21	7	3UTR		0	0
hsa-miR-891a-3p	XM_017000680	NTNG1	2376	2399	1	-21.6	1	0.0199802	0.515	0	0	-6.25121	19	23	7	3UTR		0	0
hsa-miR-892a	XM_017000680	NTNG1	3739	3763	1	-19.3	0	0.00108061	0.529	0	0	-6.50069	15	18	11	3UTR		0	0
hsa-miR-450b-5p	XM_017000680	NTNG1	3344	3365	1	-21.2	1	0.000397251	0.632	0	0	-4.957	18	21	9	3UTR		0	0
hsa-miR-892b	XM_017000680	NTNG1	3746	3764	1	-22.2	0	0.00195753	0.529	0	0	-9.30909	15	18	10	3UTR		0	0
hsa-miR-708-3p	XM_017000680	NTNG1	2531	2550	1	-19.9	0	5.73e-06	0.574	0	0	-11.6594	17	19	10	3UTR		0	0
hsa-miR-744-5p	XM_017000680	NTNG1	2680	2705	1	-23.7	1	0.000226706	0.441	0	0	-4.76182	17	25	7	3UTR		0	0
hsa-miR-885-3p	XM_017000680	NTNG1	4188	4207	1	-28.2	1	0.00222982	0.456	0	0	-5.61866	16	19	12	3UTR		0	0
hsa-miR-887-5p	XM_017000680	NTNG1	5832	5859	1	-24.2	1	5.04e-05	0.588	0	0	-7.28438	17	22	11	3UTR		0	0
hsa-miR-665	XM_017000680	NTNG1	5567	5586	1	-27.7	1	6.4e-05	0.471	0	0	-6.82767	15	19	7	3UTR		0	0
hsa-miR-873-5p	XM_017000680	NTNG1	5583	5603	1	-22.4	0	0.00523478	0.456	0	0	-9.79662	15	20	6	3UTR		0	0
hsa-miR-921	XM_017000680	NTNG1	3908	3931	1	-21.2	1	0.000817821	0.588	0	0	-6.76235	20	23	10	3UTR		0	0
hsa-miR-938	XM_017000680	NTNG1	3739	3758	1	-20.8	0	0.00228005	0.515	0	0	-11.3949	13	19	5	3UTR		0	1
hsa-miR-941	XM_017000680	NTNG1	2887	2905	1	-28	0	0.0103062	0.515	0	0	-17.0124	17	18	17	3UTR		0	0
hsa-miR-941	XM_017000680	NTNG1	5399	5416	1	-24.3	1	0.00373075	0.529	0	0	-4.957	14	17	11	3UTR		0	0
hsa-miR-942-5p	XM_017000680	NTNG1	4213	4230	1	-22.2	1	0.000217769	0.471	0	0	-3.93757	16	17	16	3UTR		0	0
hsa-miR-942-5p	XM_017000680	NTNG1	2566	2586	1	-20.3	0	0.000366518	0.544	0	0	-12.3713	16	20	6	3UTR		0	0
hsa-miR-943	XM_017000680	NTNG1	6192	6212	1	-20.8	0	0.00119359	0.632	0	0	-14.8568	16	20	8	3UTR		0	0
hsa-miR-1178-5p	XM_017000680	NTNG1	6096	6125	1	-29.5	1	0.000669893	0.456	0	0	-4.17062	17	19	17	3UTR		0	0
hsa-miR-1184	XM_017000680	NTNG1	2736	2757	1	-21.9	1	0.00039495	0.588	0	0	-6.25121	18	21	10	3UTR		0	1
hsa-miR-1225-3p	XM_017000680	NTNG1	5613	5644	1	-28	1	0.00343111	0.397	0	0	-5.03583	17	23	6	3UTR		0	0
hsa-miR-1227-5p	XM_017000680	NTNG1	4356	4374	1	-26.6	0	0.0325371	0.559	0	0	-5.71431	14	18	8	3UTR		0	0
hsa-miR-1227-3p	XM_017000680	NTNG1	3739	3764	1	-24.2	0	0.00195753	0.529	0	0	-8.5459	17	25	7	3UTR		0	0
hsa-miR-1228-5p	XM_017000680	NTNG1	2781	2803	1	-29.3	1	0.0043431	0.515	0	0	-4.957	19	22	14	3UTR		0	0
hsa-miR-1228-3p	XM_017000680	NTNG1	3929	3972	1	-27.6	0	0.0091854	0.529	0	0	-6.35195	15	19	13	3UTR		0	0
hsa-miR-1229-3p	XM_017000680	NTNG1	3955	3975	1	-23.7	0	0.232624	0.5	0	0	-10.3302	15	20	6	3UTR		0	0
hsa-miR-1231	XM_017000680	NTNG1	5475	5494	1	-22.9	1	0.0939304	0.529	0	0	-6.03692	17	19	12	3UTR		0	1
hsa-miR-1234-3p	XM_017000680	NTNG1	5614	5663	1	-24.9	1	3.18e-08	0.456	0	0	-6.24613	17	30	7	3UTR		0	0
hsa-miR-1204	XM_017000680	NTNG1	3740	3759	1	-21.3	0	0.00114103	0.515	0	0	-11.5151	14	19	6	3UTR		0	0
hsa-miR-1205	XM_017000680	NTNG1	6113	6128	1	-20	1	0.000982227	0.456	0	0	-7.37318	13	15	10	3UTR		0	0
hsa-miR-1205	XM_017000680	NTNG1	5978	5996	1	-20.1	1	0.00154198	0.456	0	0	-4.90607	14	18	11	3UTR		0	0
hsa-miR-1244	XM_017000680	NTNG1	3918	3941	1	-21.5	1	0.000537127	0.544	0	0	-4.52877	22	23	22	3UTR		0	0
hsa-miR-1266-5p	XM_017000680	NTNG1	5396	5417	1	-27.4	0	0.00392923	0.544	0	0	-10.0812	18	21	8	3UTR		0	0
hsa-miR-1266-3p	XM_017000680	NTNG1	3738	3765	1	-23.1	1	0.00146585	0.529	0	0	-11.3517	16	27	9	3UTR		0	0
hsa-miR-1275	XM_017000680	NTNG1	6091	6109	1	-22.1	0	0.000766152	0.471	0	0	-9.04149	14	18	6	3UTR		0	0
hsa-miR-1288-3p	XM_017000680	NTNG1	2525	2546	1	-22.3	0	6.44e-06	0.588	0	0	-11.4613	16	21	7	3UTR		0	0
hsa-miR-1255b-2-3p	XM_017000680	NTNG1	5582	5631	1	-21.7	1	7.07e-06	0.471	0	0	-8.3038	15	18	9	3UTR		0	0
hsa-miR-320d	XM_017000680	NTNG1	5467	5483	1	-19.7	1	0.027572	0.529	0	0	-9.9649	14	16	9	3UTR		0	0
hsa-miR-1910-3p	XM_017000680	NTNG1	3885	3924	1	-23.7	1	0.0038814	0.588	0	0	-4.17062	15	17	15	3UTR		0	0
hsa-miR-1914-3p	XM_017000680	NTNG1	2688	2723	1	-32	0	0.00154687	0.456	0	0	-12.6462	18	24	9	3UTR		0	0
hsa-miR-2114-5p	XM_017000680	NTNG1	4200	4232	1	-22.6	0	1.46e-06	0.456	0	0	-7.48304	15	20	11	3UTR		0	0
hsa-miR-2115-5p	XM_017000680	NTNG1	2526	2546	1	-20.9	0	6.44e-06	0.588	0	0	-10.3555	17	20	9	3UTR		0	0
hsa-miR-2117	XM_017000680	NTNG1	5425	5443	1	-19.8	1	0.00034909	0.5	0	0	-7.98267	15	18	10	3UTR		0	0
hsa-miR-548q	XM_017000680	NTNG1	5961	5986	1	-21.8	0	0.00011841	0.485	0	0	-6.82535	19	25	11	3UTR		0	0
hsa-miR-3116	XM_017000680	NTNG1	5363	5382	1	-23.9	0	5.09e-05	0.574	0	0	-6.85796	16	19	10	3UTR		0	0
hsa-miR-3120-5p	XM_017000680	NTNG1	3939	3966	1	-23.5	1	0.000695477	0.515	0	0	-10.8405	15	20	7	3UTR		0	1
hsa-miR-3121-5p	XM_017000680	NTNG1	5600	5638	1	-18.9	1	9.02e-05	0.426	0	0	-8.2379	13	17	9	3UTR		0	0
hsa-miR-3122	XM_017000680	NTNG1	6141	6157	1	-18.8	0	0.00680999	0.529	0	0	-10.1922	13	16	11	3UTR		0	0
hsa-miR-3124-5p	XM_017000680	NTNG1	4709	4733	1	-20.4	0	0.000612295	0.529	0	0	-17.2602	17	24	9	3UTR		0	0
hsa-miR-3125	XM_017000680	NTNG1	5467	5486	1	-26.7	1	0.0329476	0.529	0	0	-6.24613	16	19	10	3UTR		0	0
hsa-miR-3126-5p	XM_017000680	NTNG1	4702	4721	1	-21.3	0	0.00289725	0.529	0	0	-13.9804	15	19	10	3UTR		0	0
hsa-miR-3132	XM_017000680	NTNG1	5012	5036	1	-23.6	0	0.000282042	0.559	0	0	-16.134	17	24	9	3UTR		0	0
hsa-miR-3138	XM_017000680	NTNG1	6249	6271	1	-24.6	0	0.109225	0.574	0	0	-9.87071	16	22	9	3UTR		0	0
hsa-miR-3140-3p	XM_017000680	NTNG1	5842	5863	1	-22.9	1	0.000723329	0.588	0	0	-7.28438	19	21	11	3UTR		0	0
hsa-miR-3140-3p	XM_017000680	NTNG1	4892	4910	1	-21.1	0	0.00281961	0.691	0	0	-5.33701	16	18	11	3UTR		0	0
hsa-miR-3141	XM_017000680	NTNG1	2807	2827	1	-23.2	0	0.0451019	0.471	0	0	-7.20265	17	20	9	3UTR		0	0
hsa-miR-3149	XM_017000680	NTNG1	4023	4044	1	-19.7	0	4.44e-06	0.529	0	0	-8.36268	17	21	11	3UTR		0	0
hsa-miR-3155a	XM_017000680	NTNG1	2570	2601	1	-23.4	1	0.00339033	0.5	0	0	-3.93757	18	31	9	3UTR		0	0
hsa-miR-3156-5p	XM_017000680	NTNG1	5505	5521	1	-19.8	0	0.0106841	0.471	0	0	-13.6138	15	16	15	3UTR		0	0
hsa-miR-3158-3p	XM_017000680	NTNG1	5986	6027	1	-29.1	0	0.000297482	0.456	0	0	-7.7949	19	41	9	3UTR		0	0
hsa-miR-3160-5p	XM_017000680	NTNG1	5769	5805	1	-25.2	0	3.23e-05	0.485	0	0	-6.9696	19	26	13	3UTR		0	0
hsa-miR-3160-3p	XM_017000680	NTNG1	5413	5433	1	-19.3	0	0.0542015	0.485	0	0	-9.06122	14	20	11	3UTR		0	0
hsa-miR-3164	XM_017000680	NTNG1	5166	5204	1	-20	0	0.000907826	0.691	0	0	-7.0584	13	16	11	3UTR		0	0
hsa-miR-3170	XM_017000680	NTNG1	2510	2532	1	-20.9	1	1.3e-05	0.559	0	0	-7.20497	18	22	8	3UTR		0	0
hsa-miR-1193	XM_017000680	NTNG1	6246	6262	1	-21.2	1	0.344509	0.618	0	0	-9.59293	14	16	9	3UTR		0	0
hsa-miR-3186-5p	XM_017000680	NTNG1	5787	5805	1	-21.8	0	3.23e-05	0.485	0	0	-7.7148	15	18	9	3UTR		0	0
hsa-miR-3186-5p	XM_017000680	NTNG1	2469	2503	1	-21.4	0	0.00476706	0.559	0	0	-9.07604	19	34	9	3UTR		0	0
hsa-miR-3187-5p	XM_017000680	NTNG1	2334	2369	1	-28.3	0	7.37e-06	0.397	0	0	-6.9696	21	35	9	3UTR		0	0
hsa-miR-3189-5p	XM_017000680	NTNG1	3950	3971	1	-28.6	1	0.00525994	0.515	0	0	-6.24613	16	21	10	3UTR		0	0
hsa-miR-3189-3p	XM_017000680	NTNG1	5395	5417	1	-25	1	0.00392923	0.544	0	0	-4.99396	18	22	11	3UTR		0	0
hsa-miR-3190-3p	XM_017000680	NTNG1	6094	6110	1	-22.2	0	0.000901679	0.456	0	0	-8.53035	15	16	15	3UTR		0	0
hsa-miR-3197	XM_017000680	NTNG1	2351	2364	1	-26.1	0	3.07e-05	0.397	0	0	-6.74759	12	13	12	3UTR		0	0
hsa-miR-3198	XM_017000680	NTNG1	2687	2705	1	-22.7	1	0.000226706	0.441	0	0	-4.90607	14	18	8	3UTR		0	1
hsa-miR-3199	XM_017000680	NTNG1	4653	4667	1	-20.7	0	0.00829252	0.632	0	0	-9.43454	12	14	10	3UTR		0	0
hsa-miR-3200-5p	XM_017000680	NTNG1	4710	4730	1	-19.3	0	0.000848085	0.544	0	0	-12.3737	15	20	10	3UTR		0	0
hsa-miR-4297	XM_017000680	NTNG1	3947	3964	1	-19.7	1	0.000809196	0.529	0	0	-8.2379	13	17	9	3UTR		0	0
hsa-miR-378c	XM_017000680	NTNG1	5458	5479	1	-23.3	0	0.00478103	0.515	0	0	-8.70704	18	21	13	3UTR		0	0
hsa-miR-378c	XM_017000680	NTNG1	6098	6116	1	-21.8	1	0.000743983	0.426	0	0	-4.65016	16	18	9	3UTR		0	0
hsa-miR-4299	XM_017000680	NTNG1	3083	3104	1	-20.7	1	0.00385029	0.706	0	0	-4.67302	17	21	13	3UTR		0	0
hsa-miR-4298	XM_017000680	NTNG1	2777	2804	1	-25.1	0	0.00519036	0.515	0	0	-8.55977	17	27	5	3UTR		0	0
hsa-miR-4312	XM_017000680	NTNG1	3740	3765	1	-23.6	1	0.00146585	0.529	0	0	-4.957	17	25	10	3UTR		0	0
hsa-miR-4315	XM_017000680	NTNG1	6078	6099	1	-21.4	1	0.000310657	0.485	0	0	-7.14013	16	21	8	3UTR		0	0
hsa-miR-4258	XM_017000680	NTNG1	3957	3971	1	-22.1	1	0.00525994	0.515	0	0	-8.78315	12	14	7	3UTR		0	0
hsa-miR-4259	XM_017000680	NTNG1	5390	5433	1	-22.5	1	0.0542015	0.485	0	0	-6.01339	19	43	10	3UTR		0	0
hsa-miR-4325	XM_017000680	NTNG1	3957	3971	1	-17.4	0	0.00525994	0.515	0	0	-7.32045	12	14	10	3UTR		0	0
hsa-miR-4325	XM_017000680	NTNG1	2429	2445	1	-16.6	0	0.0155726	0.544	0	0	-6.62614	14	16	10	3UTR		0	0
hsa-miR-4326	XM_017000680	NTNG1	3955	3975	1	-22.9	1	0.232624	0.5	0	0	-5.10125	15	20	9	3UTR		0	0
hsa-miR-4326	XM_017000680	NTNG1	6192	6215	1	-21.2	1	0.0014934	0.603	0	0	-4.957	16	23	8	3UTR		0	0
hsa-miR-2355-3p	XM_017000680	NTNG1	2618	2636	1	-19.6	0	0.0969843	0.559	0	0	-6.57952	15	18	8	3UTR		0	0
hsa-miR-2355-3p	XM_017000680	NTNG1	3939	3961	1	-19.5	0	0.00023772	0.529	0	0	-6.82535	14	17	12	3UTR		0	0
hsa-miR-4268	XM_017000680	NTNG1	5594	5632	1	-25.5	0	7.51e-06	0.471	0	0	-7.91236	18	38	10	3UTR		0	0
hsa-miR-4271	XM_017000680	NTNG1	6137	6158	1	-21.1	0	0.00450462	0.529	0	0	-12.3311	16	21	9	3UTR		0	0
hsa-miR-4274	XM_017000680	NTNG1	4227	4248	1	-22.8	0	7.57e-05	0.544	0	0	-8.51328	15	21	9	3UTR		0	0
hsa-miR-4281	XM_017000680	NTNG1	6133	6158	1	-26.5	0	0.00450462	0.529	0	0	-5.48126	17	25	8	3UTR		0	0
hsa-miR-4286	XM_017000680	NTNG1	5109	5122	1	-19.6	0	0.00347115	0.574	0	0	-8.59573	11	13	6	3UTR		0	0
hsa-miR-4287	XM_017000680	NTNG1	5097	5124	1	-19.1	0	0.0119807	0.574	0	0	-8.86514	13	27	7	3UTR		0	0
hsa-miR-4289	XM_017000680	NTNG1	6086	6135	1	-22.9	1	0.0230218	0.441	0	0	-3.93757	16	20	10	3UTR		0	0
hsa-miR-4290	XM_017000680	NTNG1	4221	4237	1	-26.8	0	1.82e-07	0.5	0	0	-6.51454	15	16	15	3UTR		0	0
hsa-miR-4330	XM_017000680	NTNG1	5346	5382	1	-22.2	1	5.09e-05	0.574	0	0	-7.73085	15	21	10	3UTR		0	0
hsa-miR-500b-5p	XM_017000680	NTNG1	3737	3766	1	-19.5	1	0.00155467	0.544	0	0	-7.78178	13	20	8	3UTR		0	0
hsa-miR-3609	XM_017000680	NTNG1	2470	2486	1	-16.8	0	0.132888	0.544	0	0	-10.5151	15	16	15	3UTR		0	0
hsa-miR-3614-5p	XM_017000680	NTNG1	6017	6047	1	-21.5	1	0.000185172	0.529	0	0	-3.93757	21	30	8	3UTR		0	0
hsa-miR-3614-3p	XM_017000680	NTNG1	5367	5386	1	-19.9	1	0.000577464	0.544	0	0	-5.52986	16	19	13	3UTR		0	0
hsa-miR-3616-3p	XM_017000680	NTNG1	6008	6028	1	-25.5	1	0.000190288	0.471	0	0	-5.02746	19	20	19	3UTR		0	0
hsa-miR-3622a-5p	XM_017000680	NTNG1	2785	2806	1	-24.9	0	0.012776	0.485	0	0	-9.6489	18	21	12	3UTR		0	0
hsa-miR-3622a-3p	XM_017000680	NTNG1	3927	3969	1	-29.6	1	0.00477556	0.485	0	0	-6.98666	19	23	13	3UTR		0	1
hsa-miR-3655	XM_017000680	NTNG1	2944	2969	1	-27.9	0	0.00116317	0.485	0	0	-5.83853	20	25	10	3UTR		0	0
hsa-miR-3659	XM_017000680	NTNG1	2471	2502	1	-23.6	1	0.00665731	0.559	0	0	-4.02637	16	19	14	3UTR		0	0
hsa-miR-3661	XM_017000680	NTNG1	3440	3465	1	-22.9	0	0.00161676	0.559	0	0	-7.48304	17	25	6	3UTR		0	0
hsa-miR-3667-5p	XM_017000680	NTNG1	6141	6165	1	-23.9	1	1.37e-05	0.544	0	0	-8.3038	19	24	10	3UTR		0	0
hsa-miR-3675-3p	XM_017000680	NTNG1	5437	5456	1	-21.2	1	0.00139661	0.515	0	0	-8.63862	15	19	8	3UTR		0	0
hsa-miR-3679-5p	XM_017000680	NTNG1	4193	4214	1	-21.7	0	0.0281224	0.471	0	0	-8.61914	17	21	6	3UTR		0	0
hsa-miR-3679-3p	XM_017000680	NTNG1	3954	3974	1	-22.3	1	0.233968	0.515	0	0	-7.32605	16	20	7	3UTR		0	0
hsa-miR-3685	XM_017000680	NTNG1	3955	3974	1	-19	0	0.233968	0.515	0	0	-11.0902	11	14	9	3UTR		0	0
hsa-miR-3687	XM_017000680	NTNG1	2343	2368	1	-25.2	1	1.18e-05	0.397	0	0	-8.57351	19	25	10	3UTR		0	0
hsa-miR-3688-5p	XM_017000680	NTNG1	2597	2613	1	-19	0	0.000316281	0.515	0	0	-10.6827	14	16	12	3UTR		0	0
hsa-miR-3692-3p	XM_017000680	NTNG1	5638	5691	1	-24.4	1	0.00153832	0.456	0	0	-4.99396	18	23	8	3UTR		0	0
hsa-miR-3911	XM_017000680	NTNG1	2329	2348	1	-25.4	1	0.000126593	0.324	0	0	-8.40586	17	19	13	3UTR		0	0
hsa-miR-3918	XM_017000680	NTNG1	6077	6126	1	-25.9	1	0.00067854	0.441	0	0	-6.76235	17	25	8	3UTR		0	0
hsa-miR-3925-3p	XM_017000680	NTNG1	5105	5122	1	-19.5	1	0.00347115	0.574	0	0	-7.28438	16	17	16	3UTR		0	0
hsa-miR-3926	XM_017000680	NTNG1	3913	3935	1	-21.6	0	0.000104067	0.574	0	0	-10.2417	18	22	9	3UTR		0	0
hsa-miR-3928-5p	XM_017000680	NTNG1	3960	3992	1	-25.2	1	0.00086561	0.5	0	0	-7.3076	21	32	9	3UTR		0	0
hsa-miR-3928-5p	XM_017000680	NTNG1	5495	5511	1	-23.1	1	0.000149482	0.471	0	0	-5.03583	15	16	15	3UTR		0	0
hsa-miR-3929	XM_017000680	NTNG1	2777	2793	1	-20.3	1	2.51e-05	0.5	0	0	-5.08246	15	16	15	3UTR		0	0
hsa-miR-3936	XM_017000680	NTNG1	4353	4372	1	-23.6	0	0.0161645	0.559	0	0	-13.9286	15	19	9	3UTR		0	0
hsa-miR-3944-5p	XM_017000680	NTNG1	2347	2365	1	-19.7	0	1.3e-05	0.382	0	0	-8.63109	14	18	11	3UTR		0	0
hsa-miR-550b-3p	XM_017000680	NTNG1	6010	6035	1	-21.5	0	0.000870753	0.485	0	0	-6.9696	16	25	9	3UTR		0	0
hsa-miR-1268b	XM_017000680	NTNG1	2332	2360	1	-27.7	0	1.32e-05	0.382	0	0	-5.83853	19	28	8	3UTR		0	0
hsa-miR-378e	XM_017000680	NTNG1	5461	5479	1	-20.6	0	0.00478103	0.515	0	0	-8.70704	15	18	10	3UTR		0	0
hsa-miR-378f	XM_017000680	NTNG1	6098	6116	1	-21.8	1	0.000743983	0.426	0	0	-4.65016	16	18	9	3UTR		0	0
hsa-miR-4420	XM_017000680	NTNG1	2574	2596	1	-22	0	0.00741158	0.485	0	0	-7.23797	17	22	10	3UTR		0	0
hsa-miR-4423-5p	XM_017000680	NTNG1	3722	3761	1	-22.5	0	0.00189521	0.529	0	0	-7.91236	20	28	8	3UTR		0	0
hsa-miR-378g	XM_017000680	NTNG1	2673	2710	1	-23.6	1	0.000170653	0.456	0	0	-7.54065	13	15	13	3UTR		0	0
hsa-miR-378g	XM_017000680	NTNG1	6098	6116	1	-21.3	1	0.000743983	0.426	0	0	-4.65016	16	18	9	3UTR		0	0
hsa-miR-378g	XM_017000680	NTNG1	5461	5479	1	-21	0	0.00478103	0.515	0	0	-8.70704	15	18	10	3UTR		0	0
hsa-miR-4428	XM_017000680	NTNG1	2776	2805	1	-19.2	0	0.00639343	0.5	0	0	-7.7148	18	29	10	3UTR		0	0
hsa-miR-4428	XM_017000680	NTNG1	6233	6248	1	-18.3	1	0.133644	0.632	0	0	-6.09222	13	15	7	3UTR		0	0
hsa-miR-4433a-3p	XM_017000680	NTNG1	4197	4213	1	-25.7	1	0.0372153	0.471	0	0	-7.78178	14	16	8	3UTR		0	0
hsa-miR-4437	XM_017000680	NTNG1	6011	6032	1	-24.3	1	4.47e-05	0.471	0	0	-5.9255	16	21	7	3UTR		0	0
hsa-miR-4439	XM_017000680	NTNG1	3885	3902	1	-19.4	0	0.0059506	0.662	0	0	-17.1102	14	17	9	3UTR		0	0
hsa-miR-4443	XM_017000680	NTNG1	5843	5858	1	-19.3	1	9.24e-05	0.603	0	0	-5.96246	13	15	8	3UTR		0	0
hsa-miR-4446-5p	XM_017000680	NTNG1	5617	5638	1	-25.7	0	9.02e-05	0.426	0	0	-9.54656	16	21	11	3UTR		0	0
hsa-miR-4447	XM_017000680	NTNG1	2896	2911	1	-23.3	0	0.0400088	0.529	0	0	-6.46361	13	15	11	3UTR		0	1
hsa-miR-4454	XM_017000680	NTNG1	6017	6038	1	-26	0	0.0162211	0.485	0	0	-8.18405	16	21	6	3UTR		0	0
hsa-miR-4456	XM_017000680	NTNG1	3375	3393	1	-21.5	1	0.00807739	0.632	0	0	-4.957	15	18	8	3UTR		0	0
hsa-miR-4457	XM_017000680	NTNG1	2901	2938	1	-20.6	0	0.0577428	0.456	0	0	-9.68273	15	19	12	3UTR		0	0
hsa-miR-4459	XM_017000680	NTNG1	2785	2806	1	-28	0	0.012776	0.485	0	0	-5.69428	18	21	12	3UTR		0	0
hsa-miR-378h	XM_017000680	NTNG1	2948	2963	1	-22	1	7.94e-07	0.485	0	0	-4.90607	14	15	14	3UTR		0	0
hsa-miR-4464	XM_017000680	NTNG1	3009	3021	1	-16.7	0	0.0300556	0.706	0	0	-17.1102	11	12	11	3UTR		0	0
hsa-miR-548ai	XM_017000680	NTNG1	2598	2617	1	-22.7	0	5.42e-06	0.544	0	0	-10.3719	16	19	13	3UTR		0	0
hsa-miR-4467	XM_017000680	NTNG1	4350	4370	1	-25.4	0	0.00353243	0.574	0	0	-8.11448	17	20	12	3UTR		0	0
hsa-miR-4467	XM_017000680	NTNG1	4703	4721	1	-24	1	0.00289725	0.529	0	0	-6.19951	17	18	17	3UTR		0	0
hsa-miR-4469	XM_017000680	NTNG1	3739	3761	1	-26.7	1	0.00189521	0.529	0	0	-8.97335	17	22	6	3UTR		0	0
hsa-miR-4469	XM_017000680	NTNG1	5641	5677	1	-25.2	1	0.00052424	0.471	0	0	-3.93757	21	36	10	3UTR		0	0
hsa-miR-3155b	XM_017000680	NTNG1	2571	2601	1	-22	1	0.00339033	0.5	0	0	-3.93757	17	30	9	3UTR		0	0
hsa-miR-3155b	XM_017000680	NTNG1	5660	5674	1	-20.2	1	3.69e-07	0.471	0	0	-12.2551	13	14	13	3UTR		0	0
hsa-miR-4480	XM_017000680	NTNG1	3509	3528	1	-18.6	1	0.00130837	0.706	0	0	-5.9255	12	14	12	3UTR		0	0
hsa-miR-4487	XM_017000680	NTNG1	2777	2797	1	-20.4	0	0.00800329	0.515	0	0	-7.84025	15	20	6	3UTR		0	0
hsa-miR-4489	XM_017000680	NTNG1	6096	6124	1	-22.2	1	0.000495396	0.456	0	0	-5.08246	18	28	9	3UTR		0	0
hsa-miR-548al	XM_017000680	NTNG1	5726	5744	1	-16.4	0	0.00906701	0.515	0	0	-8.81432	14	18	9	3UTR		0	0
hsa-miR-4516	XM_017000680	NTNG1	5471	5488	1	-22.2	1	0.0467868	0.529	0	0	-8.52688	14	17	9	3UTR		0	0
hsa-miR-4521	XM_017000680	NTNG1	5613	5632	1	-24.1	0	7.51e-06	0.471	0	0	-16.1138	16	19	12	3UTR		0	0
hsa-miR-4529-5p	XM_017000680	NTNG1	2663	2690	1	-19.8	1	2.58e-05	0.426	0	0	-3.79332	19	27	6	3UTR		0	0
hsa-miR-4533	XM_017000680	NTNG1	2797	2817	1	-22.6	1	0.12215	0.5	0	0	-9.13263	16	20	11	3UTR		0	0
hsa-miR-4534	XM_017000680	NTNG1	2787	2803	1	-22.3	1	0.0043431	0.515	0	0	-8.00486	14	16	9	3UTR		0	0
hsa-miR-378i	XM_017000680	NTNG1	5442	5479	1	-23.5	0	0.00478103	0.515	0	0	-8.70704	17	22	10	3UTR		0	0
hsa-miR-3975	XM_017000680	NTNG1	4029	4064	1	-18.2	0	0.0146623	0.618	0	0	-8.76019	13	17	11	3UTR		0	0
hsa-miR-3978	XM_017000680	NTNG1	5657	5683	1	-22.7	0	0.00043796	0.471	0	0	-13.3775	18	26	10	3UTR		0	0
hsa-miR-4632-5p	XM_017000680	NTNG1	4361	4384	1	-29.3	1	0.375111	0.544	0	0	-5.69245	19	23	13	3UTR		0	0
hsa-miR-4633-3p	XM_017000680	NTNG1	4345	4367	1	-22.6	0	0.00195317	0.559	0	0	-5.69428	18	22	10	3UTR		0	0
hsa-miR-4641	XM_017000680	NTNG1	5942	5960	1	-21	1	0.000104624	0.603	0	0	-6.54929	15	18	11	3UTR		0	0
hsa-miR-4646-3p	XM_017000680	NTNG1	3739	3766	1	-26.7	0	0.00155467	0.544	0	0	-9.54656	14	17	9	3UTR		0	0
hsa-miR-4649-3p	XM_017000680	NTNG1	3954	3972	1	-27	0	0.0091854	0.529	0	0	-12.9896	15	18	12	3UTR		0	0
hsa-miR-4653-5p	XM_017000680	NTNG1	5412	5456	1	-24.2	1	0.00139661	0.515	0	0	-3.93757	16	19	13	3UTR		0	0
hsa-miR-4658	XM_017000680	NTNG1	2334	2353	1	-22.3	0	0.000177812	0.353	0	0	-15.9878	15	19	13	3UTR		0	0
hsa-miR-4658	XM_017000680	NTNG1	3389	3410	1	-21.8	1	0.000137572	0.574	0	0	-8.57351	16	21	11	3UTR		0	0
hsa-miR-4677-5p	XM_017000680	NTNG1	5793	5816	1	-24.5	1	0.00461492	0.529	0	0	-4.65016	19	23	13	3UTR		0	0
hsa-miR-4682	XM_017000680	NTNG1	5652	5675	1	-25.1	0	2.64e-05	0.485	0	0	-11.7382	20	23	11	3UTR		0	0
hsa-miR-4686	XM_017000680	NTNG1	3746	3764	1	-21	1	0.00195753	0.529	0	0	-10.0807	15	18	9	3UTR		0	0
hsa-miR-4690-5p	XM_017000680	NTNG1	5658	5681	1	-25.8	0	0.00133838	0.485	0	0	-8.43861	16	23	5	3UTR		0	1
hsa-miR-4690-5p	XM_017000680	NTNG1	6107	6137	1	-25.6	1	0.0312463	0.456	0	0	-6.23647	18	30	10	3UTR		0	1
hsa-miR-4692	XM_017000680	NTNG1	4340	4365	1	-22.3	1	0.00132164	0.544	0	0	-3.79332	16	18	16	3UTR		0	0
hsa-miR-4701-5p	XM_017000680	NTNG1	5757	5807	1	-28.3	0	2.38e-05	0.5	0	0	-6.72377	20	50	10	3UTR		0	0
hsa-miR-4706	XM_017000680	NTNG1	2788	2806	1	-29.4	1	0.012776	0.485	0	0	-4.957	16	18	10	3UTR		0	0
hsa-miR-4707-3p	XM_017000680	NTNG1	3743	3765	1	-24.1	1	0.00146585	0.529	0	0	-12.0971	16	22	6	3UTR		0	0
hsa-miR-4710	XM_017000680	NTNG1	6237	6253	1	-26	1	0.142448	0.618	0	0	-5.18008	15	16	15	3UTR		0	0
hsa-miR-4710	XM_017000680	NTNG1	4356	4372	1	-23.2	0	0.0161645	0.559	0	0	-10.4142	14	16	10	3UTR		0	0
hsa-miR-4712-5p	XM_017000680	NTNG1	6151	6172	1	-18.9	1	3.34e-05	0.5	0	0	-4.90607	14	21	8	3UTR		0	0
hsa-miR-4720-3p	XM_017000680	NTNG1	3485	3504	1	-20.9	0	0.0105425	0.632	0	0	-12.3778	16	19	13	3UTR		0	0
hsa-miR-4721	XM_017000680	NTNG1	5660	5682	1	-28.2	0	0.00153614	0.485	0	0	-9.02511	18	22	9	3UTR		0	0
hsa-miR-4725-5p	XM_017000680	NTNG1	3742	3765	1	-24.5	0	0.00146585	0.529	0	0	-10.5818	12	16	6	3UTR		0	0
hsa-miR-4732-5p	XM_017000680	NTNG1	4200	4223	1	-21.8	0	0.000694226	0.485	0	0	-12.0571	17	23	9	3UTR		0	0
hsa-miR-4736	XM_017000680	NTNG1	5513	5528	1	-21.6	0	0.109359	0.529	0	0	-7.91236	14	15	14	3UTR		0	0
hsa-miR-3064-5p	XM_017000680	NTNG1	4740	4761	1	-25.8	1	0.00713898	0.632	0	0	-7.28438	19	21	11	3UTR		0	0
hsa-miR-4738-5p	XM_017000680	NTNG1	4485	4507	1	-21	1	0.000548122	0.618	0	0	-6.10696	18	22	12	3UTR		0	0
hsa-miR-4738-5p	XM_017000680	NTNG1	3201	3220	1	-19	1	0.00192725	0.603	0	0	-6.67474	15	19	11	3UTR		0	0
hsa-miR-4742-3p	XM_017000680	NTNG1	5792	5813	1	-20.8	1	2.34e-05	0.529	0	0	-5.52986	17	21	8	3UTR		0	0
hsa-miR-4743-5p	XM_017000680	NTNG1	2791	2817	1	-25.9	0	0.12215	0.5	0	0	-11.8241	19	26	12	3UTR		0	0
hsa-miR-4743-3p	XM_017000680	NTNG1	3739	3766	1	-22.8	1	0.00155467	0.544	0	0	-3.93757	21	27	10	3UTR		0	0
hsa-miR-4748	XM_017000680	NTNG1	6125	6147	1	-23.2	0	0.0290707	0.485	0	0	-8.23906	17	22	6	3UTR		0	0
hsa-miR-4749-5p	XM_017000680	NTNG1	2778	2801	1	-27	1	0.00369268	0.515	0	0	-6.10696	18	23	8	3UTR		0	0
hsa-miR-4752	XM_017000680	NTNG1	5590	5611	1	-19.8	0	0.00380809	0.471	0	0	-11.3547	18	21	10	3UTR		0	0
hsa-miR-371b-3p	XM_017000680	NTNG1	5938	5965	1	-22.2	0	1.63e-05	0.574	0	0	-6.82535	20	27	9	3UTR		0	0
hsa-miR-4754	XM_017000680	NTNG1	2837	2858	1	-22.2	0	0.00184476	0.618	0	0	-11.608	17	21	12	3UTR		0	0
hsa-miR-4755-5p	XM_017000680	NTNG1	5545	5573	1	-19.8	0	6.77e-10	0.456	0	0	-11.3719	14	18	9	3UTR		0	0
hsa-miR-4755-3p	XM_017000680	NTNG1	5654	5674	1	-23.3	1	3.69e-07	0.471	0	0	-9.59293	13	15	13	3UTR		0	0
hsa-miR-4758-3p	XM_017000680	NTNG1	3928	3971	1	-30.7	1	0.00525994	0.515	0	0	-6.78234	15	19	11	3UTR		0	0
hsa-miR-4768-5p	XM_017000680	NTNG1	3738	3760	1	-21.6	1	0.00143694	0.529	0	0	-7.14013	16	22	6	3UTR		0	0
hsa-miR-4768-3p	XM_017000680	NTNG1	5563	5586	1	-20.9	1	6.4e-05	0.471	0	0	-8.57351	15	23	7	3UTR		0	0
hsa-miR-4769-3p	XM_017000680	NTNG1	3953	3972	1	-26.4	0	0.0091854	0.529	0	0	-12.63	17	19	9	3UTR		0	0
hsa-miR-4772-3p	XM_017000680	NTNG1	3748	3764	1	-19.2	0	0.00195753	0.529	0	0	-10.729	13	16	8	3UTR		0	0
hsa-miR-4772-3p	XM_017000680	NTNG1	2737	2757	1	-18.9	1	0.00039495	0.588	0	0	-11.3749	16	20	9	3UTR		0	0
hsa-miR-4776-5p	XM_017000680	NTNG1	4350	4369	1	-23.1	0	0.00275516	0.574	0	0	-12.7823	17	19	13	3UTR		0	0
hsa-miR-4436b-5p	XM_017000680	NTNG1	3929	3970	1	-28.3	0	0.00493366	0.5	0	0	-8.3861	17	21	11	3UTR		0	0
hsa-miR-4781-5p	XM_017000680	NTNG1	5350	5372	1	-19.3	1	0.00196167	0.618	0	0	-6.97192	16	22	8	3UTR		0	0
hsa-miR-2467-5p	XM_017000680	NTNG1	4453	4472	1	-22.5	0	0.00010449	0.588	0	0	-14.2298	16	19	8	3UTR		0	0
hsa-miR-4786-5p	XM_017000680	NTNG1	5635	5667	1	-22.3	0	2.5e-08	0.456	0	0	-16.4904	16	32	9	3UTR		0	0
hsa-miR-4788	XM_017000680	NTNG1	6143	6166	1	-21.6	0	1.44e-05	0.544	0	0	-6.51454	18	23	10	3UTR		0	0
hsa-miR-4793-3p	XM_017000680	NTNG1	2919	2966	1	-24	1	0.000100961	0.515	0	0	-7.48864	19	47	9	3UTR		0	0
hsa-miR-5001-3p	XM_017000680	NTNG1	5584	5628	1	-22.7	0	8.16e-07	0.485	0	0	-10.1324	14	18	9	3UTR		0	0
hsa-miR-5003-5p	XM_017000680	NTNG1	2835	2856	1	-18.3	0	0.00273613	0.588	0	0	-10.5818	17	21	11	3UTR		0	0
hsa-miR-5003-3p	XM_017000680	NTNG1	3738	3757	1	-18	1	0.000597383	0.515	0	0	-6.93496	16	19	11	3UTR		0	0
hsa-miR-5004-5p	XM_017000680	NTNG1	2828	2852	1	-21.2	1	0.0131256	0.588	0	0	-4.52877	18	24	9	3UTR		0	1
hsa-miR-5004-3p	XM_017000680	NTNG1	5662	5682	1	-24.6	0	0.00153614	0.485	0	0	-8.55977	18	20	13	3UTR		0	0
hsa-miR-5010-5p	XM_017000680	NTNG1	4358	4372	1	-23.9	0	0.0161645	0.559	0	0	-7.35753	13	14	13	3UTR		0	0
hsa-miR-5088-5p	XM_017000680	NTNG1	2789	2813	1	-28	0	0.126749	0.485	0	0	-6.55112	19	24	11	3UTR		0	0
hsa-miR-5187-5p	XM_017000680	NTNG1	2780	2812	1	-27.1	0	0.131671	0.471	0	0	-6.19385	18	23	7	3UTR		0	0
hsa-miR-5194	XM_017000680	NTNG1	5457	5476	1	-23.2	1	0.00453513	0.485	0	0	-6.10696	16	19	10	3UTR		0	0
hsa-miR-5195-3p	XM_017000680	NTNG1	5557	5587	1	-28.7	1	0.000103926	0.471	0	0	-7.14013	19	30	9	3UTR		1	0
hsa-miR-5196-3p	XM_017000680	NTNG1	3955	3975	1	-25.3	0	0.232624	0.5	0	0	-6.78424	17	20	9	3UTR		0	0
hsa-miR-5197-3p	XM_017000680	NTNG1	4397	4420	1	-15.8	1	0.00917716	0.721	0	0	-6.90779	11	13	11	3UTR		0	0
hsa-miR-5579-3p	XM_017000680	NTNG1	4201	4219	1	-17.1	0	0.0116362	0.456	0	0	-8.35072	15	18	12	3UTR		0	0
hsa-miR-664b-3p	XM_017000680	NTNG1	3950	3970	1	-24.6	1	0.00493366	0.5	0	0	-4.67302	16	20	14	3UTR		0	1
hsa-miR-5584-3p	XM_017000680	NTNG1	3953	3977	1	-23.1	1	0.000186213	0.485	0	0	-4.957	15	19	10	3UTR		0	0
hsa-miR-5587-3p	XM_017000680	NTNG1	6002	6023	1	-24.2	1	0.000271442	0.471	0	0	-8.57351	16	21	7	3UTR		0	0
hsa-miR-5591-3p	XM_017000680	NTNG1	5622	5640	1	-20.8	0	0.00118494	0.412	0	0	-10.853	14	18	9	3UTR		0	0
hsa-miR-5680	XM_017000680	NTNG1	5473	5486	1	-17	0	0.0329476	0.529	0	0	-7.3066	12	13	12	3UTR		0	0
hsa-miR-548aw	XM_017000680	NTNG1	5964	5983	1	-17.8	1	0.00697197	0.485	0	0	-6.9954	16	19	14	3UTR		0	0
hsa-miR-5692a	XM_017000680	NTNG1	2970	2996	1	-18.6	0	0.00278571	0.574	0	0	-15.5666	16	26	9	3UTR		0	0
hsa-miR-5694	XM_017000680	NTNG1	4657	4679	1	-20.1	0	0.00147607	0.603	0	0	-11.4034	16	22	12	3UTR		0	0
hsa-miR-5705	XM_017000680	NTNG1	5656	5676	1	-26.2	1	0.000348572	0.485	0	0	-6.93496	17	20	7	3UTR		0	0
hsa-miR-5706	XM_017000680	NTNG1	5312	5331	1	-19.3	1	0.00288494	0.676	0	0	-12.6408	17	19	15	3UTR		0	0
hsa-miR-5708	XM_017000680	NTNG1	5118	5147	1	-22.3	1	0.000101659	0.603	0	0	-3.93757	17	21	10	3UTR		0	0
hsa-miR-5739	XM_017000680	NTNG1	5446	5474	1	-23.2	1	0.00350192	0.485	0	0	-4.957	18	28	8	3UTR		0	0
hsa-miR-6075	XM_017000680	NTNG1	4350	4367	1	-24.9	0	0.00195317	0.559	0	0	-8.40165	15	17	12	3UTR		0	0
hsa-miR-6080	XM_017000680	NTNG1	4344	4361	1	-21.6	1	0.000270595	0.544	0	0	-5.19005	15	17	13	3UTR		0	0
hsa-miR-6088	XM_017000680	NTNG1	6131	6152	1	-22.3	0	0.0366176	0.5	0	0	-8.51906	17	21	9	3UTR		0	0
hsa-miR-6128	XM_017000680	NTNG1	4171	4185	1	-14.9	1	0.00830763	0.544	0	0	-8.25288	13	14	13	3UTR		0	0
hsa-miR-378j	XM_017000680	NTNG1	6098	6116	1	-19.5	1	0.000743983	0.426	0	0	-4.65016	16	18	9	3UTR		0	0
hsa-miR-6130	XM_017000680	NTNG1	6227	6250	1	-17.4	1	0.163217	0.632	0	0	-7.05204	12	15	8	3UTR		0	0
hsa-miR-6499-3p	XM_017000680	NTNG1	2357	2396	1	-24	1	0.0193243	0.544	0	0	-4.17062	20	34	16	3UTR		0	0
hsa-miR-6500-5p	XM_017000680	NTNG1	5652	5684	1	-26.6	0	1.5e-05	0.471	0	0	-7.7949	20	27	10	3UTR		0	0
hsa-miR-6501-5p	XM_017000680	NTNG1	4652	4683	1	-34.5	1	0.0100509	0.559	0	0	-4.957	20	31	14	3UTR		0	0
hsa-miR-6507-3p	XM_017000680	NTNG1	5752	5773	1	-21.7	0	0.110169	0.441	0	0	-13.6656	17	21	13	3UTR		0	0
hsa-miR-6508-3p	XM_017000680	NTNG1	3673	3692	1	-17.9	0	0.000309711	0.618	0	0	-10.3702	17	19	13	3UTR		0	0
hsa-miR-6509-5p	XM_017000680	NTNG1	4176	4213	1	-23	0	0.0372153	0.471	0	0	-8.05823	14	16	14	3UTR		0	0
hsa-miR-6510-5p	XM_017000680	NTNG1	4181	4205	1	-22.1	1	0.00186717	0.471	0	0	-6.46952	17	24	8	3UTR		0	0
hsa-miR-6511a-3p	XM_017000680	NTNG1	3948	3971	1	-22.6	1	0.00525994	0.515	0	0	-7.3076	17	23	7	3UTR		0	0
hsa-miR-6512-5p	XM_017000680	NTNG1	4408	4424	1	-16.9	0	0.00532871	0.735	0	0	-6.51454	14	16	11	3UTR		0	0
hsa-miR-6513-5p	XM_017000680	NTNG1	5943	5965	1	-25.7	0	1.63e-05	0.574	0	0	-13.9286	17	22	11	3UTR		0	0
hsa-miR-6515-5p	XM_017000680	NTNG1	6240	6257	1	-19.5	1	0.358029	0.618	0	0	-7.47494	14	17	9	3UTR		0	0
hsa-miR-6515-3p	XM_017000680	NTNG1	3954	3975	1	-23.7	1	0.232624	0.5	0	0	-7.28438	17	21	9	3UTR		0	0
hsa-miR-6715b-5p	XM_017000680	NTNG1	2914	2938	1	-25.1	0	0.0577428	0.456	0	0	-9.69585	17	24	10	3UTR		0	0
hsa-miR-6716-5p	XM_017000680	NTNG1	2787	2804	1	-23.3	0	0.00519036	0.515	0	0	-9.50465	16	17	16	3UTR		0	0
hsa-miR-6717-5p	XM_017000680	NTNG1	4361	4384	1	-23.7	1	0.375111	0.544	0	0	-5.52986	17	23	9	3UTR		0	0
hsa-miR-892c-3p	XM_017000680	NTNG1	3725	3763	1	-23.2	1	0.00108061	0.529	0	0	-4.957	16	18	16	3UTR		0	0
hsa-miR-6726-3p	XM_017000680	NTNG1	3929	3970	1	-26.1	0	0.00493366	0.5	0	0	-8.05661	17	22	14	3UTR		0	0
hsa-miR-6728-5p	XM_017000680	NTNG1	4349	4373	1	-24.4	0	0.0241104	0.559	0	0	-6.42973	18	24	7	3UTR		0	0
hsa-miR-6728-3p	XM_017000680	NTNG1	3954	3972	1	-29.2	1	0.0091854	0.529	0	0	-7.54034	17	18	17	3UTR		0	0
hsa-miR-6733-3p	XM_017000680	NTNG1	4727	4743	1	-20.3	1	0.000460934	0.529	0	0	-8.42926	15	16	15	3UTR		0	0
hsa-miR-6736-5p	XM_017000680	NTNG1	6011	6034	1	-25.5	0	4.89e-05	0.471	0	0	-8.05661	18	23	10	3UTR		0	0
hsa-miR-6737-3p	XM_017000680	NTNG1	5111	5132	1	-23.3	0	2.19e-05	0.544	0	0	-7.61527	15	21	8	3UTR		0	0
hsa-miR-6738-5p	XM_017000680	NTNG1	4349	4375	1	-24.7	0	0.0435547	0.559	0	0	-9.37628	19	26	8	3UTR		0	0
hsa-miR-6739-3p	XM_017000680	NTNG1	5795	5816	1	-23.3	1	0.00461492	0.529	0	0	-7.10297	17	21	8	3UTR		0	0
hsa-miR-6740-5p	XM_017000680	NTNG1	2789	2809	1	-20.4	1	0.015947	0.5	0	0	-4.76182	16	20	9	3UTR		0	0
hsa-miR-6740-3p	XM_017000680	NTNG1	4214	4238	1	-23	1	4.79e-07	0.515	0	0	-4.957	14	17	10	3UTR		0	0
hsa-miR-6742-5p	XM_017000680	NTNG1	4340	4374	1	-27.6	1	0.0325371	0.559	0	0	-8.76407	14	19	9	3UTR		0	0
hsa-miR-6745	XM_017000680	NTNG1	2787	2804	1	-21.9	1	0.00519036	0.515	0	0	-6.6181	14	17	6	3UTR		0	0
hsa-miR-6746-3p	XM_017000680	NTNG1	3938	3971	1	-27.9	0	0.00525994	0.515	0	0	-8.4155	14	16	14	3UTR		0	0
hsa-miR-6750-3p	XM_017000680	NTNG1	3754	3774	1	-25.4	0	0.0396409	0.574	0	0	-8.32703	15	20	10	3UTR		0	0
hsa-miR-6753-3p	XM_017000680	NTNG1	5761	5780	1	-24.4	1	0.166333	0.471	0	0	-7.10297	15	19	10	3UTR		0	0
hsa-miR-6754-3p	XM_017000680	NTNG1	3917	3972	1	-35	1	0.0091854	0.529	0	0	-4.17062	19	23	15	3UTR		0	0
hsa-miR-6755-3p	XM_017000680	NTNG1	5409	5434	1	-19.7	0	0.0581891	0.5	0	0	-10.7522	18	25	13	3UTR		0	0
hsa-miR-6757-3p	XM_017000680	NTNG1	3954	3970	1	-22.8	0	0.00493366	0.5	0	0	-14.1481	14	16	12	3UTR		0	0
hsa-miR-6761-3p	XM_017000680	NTNG1	3953	3971	1	-22.2	0	0.00525994	0.515	0	0	-8.82806	17	18	17	3UTR		0	0
hsa-miR-6767-5p	XM_017000680	NTNG1	5359	5375	1	-20.3	0	0.00353202	0.603	0	0	-8.36268	15	16	15	3UTR		0	0
hsa-miR-6771-5p	XM_017000680	NTNG1	6115	6140	1	-27.2	0	0.0524616	0.441	0	0	-8.05823	16	25	9	3UTR		0	0
hsa-miR-6772-5p	XM_017000680	NTNG1	2329	2351	1	-27.9	0	6.89e-05	0.338	0	0	-7.41489	18	22	13	3UTR		0	0
hsa-miR-6772-5p	XM_017000680	NTNG1	5467	5489	1	-27.4	0	0.0313023	0.515	0	0	-9.6003	17	22	9	3UTR		0	0
hsa-miR-6773-3p	XM_017000680	NTNG1	5760	5778	1	-21.9	0	0.132762	0.456	0	0	-8.68381	15	18	10	3UTR		0	0
hsa-miR-6774-5p	XM_017000680	NTNG1	5995	6019	1	-27.1	1	6.18e-06	0.471	0	0	-9.2861	20	24	10	3UTR		0	0
hsa-miR-6776-3p	XM_017000680	NTNG1	3929	3971	1	-24.2	0	0.00525994	0.515	0	0	-8.4155	15	18	10	3UTR		0	0
hsa-miR-6777-5p	XM_017000680	NTNG1	4192	4215	1	-27.7	1	0.0184708	0.456	0	0	-7.86061	20	23	14	3UTR		0	0
hsa-miR-6779-5p	XM_017000680	NTNG1	5473	5490	1	-25.1	1	0.0408152	0.515	0	0	-4.17062	15	17	8	3UTR		0	0
hsa-miR-6782-3p	XM_017000680	NTNG1	3960	3987	1	-24.8	0	0.000334453	0.5	0	0	-6.51454	18	27	11	3UTR		0	0
hsa-miR-6784-3p	XM_017000680	NTNG1	3956	3975	1	-23	0	0.232624	0.5	0	0	-13.6203	16	19	11	3UTR		0	0
hsa-miR-6788-5p	XM_017000680	NTNG1	5458	5490	1	-23.3	1	0.0408152	0.515	0	0	-10.3422	17	23	10	3UTR		0	0
hsa-miR-6788-3p	XM_017000680	NTNG1	3930	3973	1	-28.9	0	0.234407	0.515	0	0	-9.79437	18	24	6	3UTR		0	0
hsa-miR-6795-5p	XM_017000680	NTNG1	2788	2817	1	-24.5	1	0.12215	0.5	0	0	-4.17062	22	29	10	3UTR		0	0
hsa-miR-6799-5p	XM_017000680	NTNG1	6115	6140	1	-29.5	0	0.0524616	0.441	0	0	-8.85129	17	25	11	3UTR		0	0
hsa-miR-6799-3p	XM_017000680	NTNG1	3740	3765	1	-24.4	1	0.00146585	0.529	0	0	-6.87023	16	25	10	3UTR		0	0
hsa-miR-6802-5p	XM_017000680	NTNG1	5655	5674	1	-22.8	0	3.69e-07	0.471	0	0	-7.7949	15	19	9	3UTR		0	0
hsa-miR-6804-3p	XM_017000680	NTNG1	3955	3970	1	-27.7	1	0.00493366	0.5	0	0	-6.06975	13	15	12	3UTR		0	1
hsa-miR-6804-3p	XM_017000680	NTNG1	5752	5768	1	-26.1	0	0.101877	0.485	0	0	-9.54656	14	16	11	3UTR		0	1
hsa-miR-6805-5p	XM_017000680	NTNG1	5537	5566	1	-26.9	1	1.31e-05	0.441	0	0	-4.52877	20	29	13	3UTR		0	1
hsa-miR-6809-3p	XM_017000680	NTNG1	3954	3974	1	-24.1	1	0.233968	0.515	0	0	-7.49372	17	20	7	3UTR		0	0
hsa-miR-6810-5p	XM_017000680	NTNG1	4350	4373	1	-25.4	0	0.0241104	0.559	0	0	-10.8298	18	23	10	3UTR		0	0
hsa-miR-6810-5p	XM_017000680	NTNG1	6111	6140	1	-24.5	1	0.0524616	0.441	0	0	-6.24613	18	29	13	3UTR		0	0
hsa-miR-6810-3p	XM_017000680	NTNG1	3739	3765	1	-41.2	1	0.00146585	0.529	0	0	-4.957	21	26	12	3UTR		0	0
hsa-miR-6812-3p	XM_017000680	NTNG1	3739	3764	1	-27.1	1	0.00195753	0.529	0	0	-6.97192	18	25	6	3UTR		0	0
hsa-miR-6814-3p	XM_017000680	NTNG1	3938	3970	1	-24.2	0	0.00493366	0.5	0	0	-7.65065	15	20	10	3UTR		0	0
hsa-miR-6816-5p	XM_017000680	NTNG1	2787	2804	1	-28.9	1	0.00519036	0.515	0	0	-3.79332	15	17	8	3UTR		0	0
hsa-miR-6821-3p	XM_017000680	NTNG1	3938	3964	1	-22.6	0	0.000809196	0.529	0	0	-7.0874	18	26	9	3UTR		0	0
hsa-miR-6822-3p	XM_017000680	NTNG1	3734	3761	1	-24.5	0	0.00189521	0.529	0	0	-9.18387	18	27	10	3UTR		0	0
hsa-miR-6823-3p	XM_017000680	NTNG1	5759	5787	1	-24.8	1	0.00742703	0.441	0	0	-4.957	17	28	9	3UTR		0	0
hsa-miR-6826-5p	XM_017000680	NTNG1	4335	4389	1	-21.9	1	0.0640083	0.544	0	0	-7.09331	16	22	8	3UTR		0	0
hsa-miR-6833-5p	XM_017000680	NTNG1	5468	5492	1	-22	0	0.113199	0.529	0	0	-13.2104	16	24	8	3UTR		0	0
hsa-miR-6833-5p	XM_017000680	NTNG1	6230	6251	1	-19.4	0	0.184384	0.632	0	0	-8.74633	17	21	10	3UTR		0	0
hsa-miR-6833-3p	XM_017000680	NTNG1	3749	3768	1	-22.2	1	0.0602868	0.559	0	0	-7.28438	17	19	10	3UTR		0	0
hsa-miR-6833-3p	XM_017000680	NTNG1	3957	3976	1	-23	0	0.00357041	0.5	0	0	-5.69428	17	19	13	3UTR		0	0
hsa-miR-6835-3p	XM_017000680	NTNG1	3955	3983	1	-21	0	0.000783571	0.5	0	0	-12.3713	16	28	10	3UTR		1	1
hsa-miR-6835-3p	XM_017000680	NTNG1	5622	5641	1	-20.4	0	0.0014436	0.412	0	0	-10.8357	16	19	11	3UTR		1	1
hsa-miR-6780b-5p	XM_017000680	NTNG1	5468	5489	1	-23.7	1	0.0313023	0.515	0	0	-7.4978	18	21	12	3UTR		0	0
hsa-miR-6837-5p	XM_017000680	NTNG1	6106	6125	1	-25.6	1	0.000669893	0.456	0	0	-7.10297	16	19	10	3UTR		0	0
hsa-miR-6837-3p	XM_017000680	NTNG1	2945	2968	1	-26.3	1	0.00075525	0.5	0	0	-5.03583	19	23	10	3UTR		0	0
hsa-miR-6840-3p	XM_017000680	NTNG1	5395	5416	1	-27.7	1	0.00373075	0.529	0	0	-8.93173	18	21	10	3UTR		0	0
hsa-miR-6841-5p	XM_017000680	NTNG1	6005	6026	1	-23	1	0.000174889	0.456	0	0	-5.08246	18	21	8	3UTR		0	0
hsa-miR-6841-3p	XM_017000680	NTNG1	3954	3971	1	-24.5	0	0.00525994	0.515	0	0	-10.6702	15	17	10	3UTR		0	0
hsa-miR-6846-3p	XM_017000680	NTNG1	3938	3971	1	-29.2	0	0.00525994	0.515	0	0	-8.82818	15	18	11	3UTR		0	0
hsa-miR-6847-5p	XM_017000680	NTNG1	3138	3161	1	-22.5	1	0.0609755	0.632	0	0	-4.957	19	23	9	3UTR		0	0
hsa-miR-6847-3p	XM_017000680	NTNG1	2487	2508	1	-23.3	1	0.0355902	0.544	0	0	-6.76235	17	21	11	3UTR		0	0
hsa-miR-6848-3p	XM_017000680	NTNG1	5795	5817	1	-27.8	0	0.00478973	0.515	0	0	-9.28323	17	22	11	3UTR		0	0
hsa-miR-6851-5p	XM_017000680	NTNG1	2677	2703	1	-28.6	0	0.000501356	0.456	0	0	-10.226	20	26	9	3UTR		0	0
hsa-miR-6851-3p	XM_017000680	NTNG1	5613	5639	1	-24.8	1	0.000192148	0.426	0	0	-4.957	19	26	8	3UTR		0	0
hsa-miR-6853-5p	XM_017000680	NTNG1	5354	5371	1	-21	0	0.00301249	0.632	0	0	-8.05661	15	17	8	3UTR		0	0
hsa-miR-6858-5p	XM_017000680	NTNG1	4182	4216	1	-31.7	1	0.0148696	0.456	0	0	-6.28309	18	21	10	3UTR		0	0
hsa-miR-6858-5p	XM_017000680	NTNG1	6119	6144	1	-28.3	0	0.0405841	0.456	0	0	-7.62723	17	25	11	3UTR		0	0
hsa-miR-6859-3p	XM_017000680	NTNG1	5942	5963	1	-23.2	0	4.36e-05	0.574	0	0	-7.0584	17	21	13	3UTR		0	0
hsa-miR-6862-5p	XM_017000680	NTNG1	3982	4038	1	-23.4	1	6.75e-06	0.559	0	0	-4.02637	16	25	9	3UTR		0	0
hsa-miR-6866-3p	XM_017000680	NTNG1	3956	3972	1	-20.3	0	0.0091854	0.529	0	0	-9.06247	15	16	15	3UTR		0	0
hsa-miR-6868-3p	XM_017000680	NTNG1	3916	3961	1	-24.9	0	0.00023772	0.529	0	0	-5.48126	20	24	7	3UTR		0	0
hsa-miR-6869-3p	XM_017000680	NTNG1	2352	2370	1	-26	0	2.54e-05	0.412	0	0	-8.70402	15	18	9	3UTR		0	0
hsa-miR-6871-5p	XM_017000680	NTNG1	2792	2812	1	-24.2	0	0.131671	0.471	0	0	-8.82818	16	20	11	3UTR		0	0
hsa-miR-6871-3p	XM_017000680	NTNG1	5613	5641	1	-28.8	1	0.0014436	0.412	0	0	-8.3038	15	20	6	3UTR		0	0
hsa-miR-6872-3p	XM_017000680	NTNG1	3946	3970	1	-26.6	1	0.00493366	0.5	0	0	-6.81899	17	24	8	3UTR		0	0
hsa-miR-6875-5p	XM_017000680	NTNG1	6004	6027	1	-23.3	1	0.000297482	0.456	0	0	-4.65016	18	23	8	3UTR		0	0
hsa-miR-6875-3p	XM_017000680	NTNG1	3956	3976	1	-28.8	1	0.00357041	0.5	0	0	-8.09365	16	20	8	3UTR		0	0
hsa-miR-6878-5p	XM_017000680	NTNG1	5473	5488	1	-21.8	1	0.0467868	0.529	0	0	-5.3155	13	15	11	3UTR		0	0
hsa-miR-6879-5p	XM_017000680	NTNG1	2790	2813	1	-22.8	1	0.126749	0.485	0	0	-7.87558	16	23	6	3UTR		0	0
hsa-miR-6879-3p	XM_017000680	NTNG1	5613	5642	1	-28.6	0	0.00175631	0.412	0	0	-5.49511	20	29	7	3UTR		0	0
hsa-miR-6881-5p	XM_017000680	NTNG1	5464	5489	1	-24.7	0	0.0313023	0.515	0	0	-12.0101	19	25	10	3UTR		0	0
hsa-miR-6882-3p	XM_017000680	NTNG1	3938	3965	1	-29	1	0.000687527	0.515	0	0	-4.957	20	27	10	3UTR		0	0
hsa-miR-6882-3p	XM_017000680	NTNG1	4214	4237	1	-28.5	0	1.82e-07	0.5	0	0	-13.6656	15	18	11	3UTR		0	0
hsa-miR-6884-5p	XM_017000680	NTNG1	6139	6160	1	-20.6	1	0.00050314	0.559	0	0	-5.10125	16	21	10	3UTR		0	0
hsa-miR-6885-5p	XM_017000680	NTNG1	2598	2621	1	-27.9	1	0.00041907	0.559	0	0	-6.32527	17	23	9	3UTR		0	0
hsa-miR-6885-3p	XM_017000680	NTNG1	3953	3974	1	-27.9	0	0.233968	0.515	0	0	-10.3702	17	21	7	3UTR	MIRT789315	0	0
hsa-miR-6890-5p	XM_017000680	NTNG1	4351	4373	1	-24.9	1	0.0241104	0.559	0	0	-6.24644	16	22	6	3UTR		0	0
hsa-miR-6892-5p	XM_017000680	NTNG1	2789	2805	1	-23.3	0	0.00639343	0.5	0	0	-8.42777	15	16	15	3UTR		0	0
hsa-miR-6893-3p	XM_017000680	NTNG1	3929	3971	1	-27.5	1	0.00525994	0.515	0	0	-4.79441	18	22	10	3UTR		0	0
hsa-miR-6894-3p	XM_017000680	NTNG1	3739	3767	1	-26.1	0	0.00240775	0.544	0	0	-6.5515	19	28	8	3UTR		0	0
hsa-miR-6895-5p	XM_017000680	NTNG1	6100	6125	1	-22.2	1	0.000669893	0.456	0	0	-9.43035	16	25	9	3UTR		0	0
hsa-miR-6895-3p	XM_017000680	NTNG1	5791	5811	1	-23.9	0	1.33e-05	0.515	0	0	-13.4023	17	20	12	3UTR		0	0
hsa-miR-7106-5p	XM_017000680	NTNG1	2800	2820	1	-23.7	0	0.116302	0.485	0	0	-11.9129	14	20	9	3UTR		0	0
hsa-miR-7106-5p	XM_017000680	NTNG1	5457	5489	1	-23.2	1	0.0313023	0.515	0	0	-4.17062	19	32	8	3UTR		0	0
hsa-miR-7108-3p	XM_017000680	NTNG1	3938	3970	1	-30.7	1	0.00493366	0.5	0	0	-6.10696	14	17	8	3UTR		0	0
hsa-miR-7110-5p	XM_017000680	NTNG1	6133	6148	1	-24.4	1	0.0273802	0.485	0	0	-5.08276	13	15	7	3UTR		0	1
hsa-miR-7110-3p	XM_017000680	NTNG1	4214	4238	1	-29.6	0	4.79e-07	0.515	0	0	-8.31989	17	19	17	3UTR		0	0
hsa-miR-7111-5p	XM_017000680	NTNG1	2786	2805	1	-28.9	0	0.00639343	0.5	0	0	-7.48298	17	19	12	3UTR		0	0
hsa-miR-7111-5p	XM_017000680	NTNG1	4350	4371	1	-26.3	1	0.00725971	0.574	0	0	-6.32496	16	21	6	3UTR		0	0
hsa-miR-7112-3p	XM_017000680	NTNG1	5845	5872	1	-22.7	0	0.00548664	0.574	0	0	-9.28323	20	27	9	3UTR		0	0
hsa-miR-7113-3p	XM_017000680	NTNG1	3938	3972	1	-31	1	0.0091854	0.529	0	0	-7.78178	18	23	8	3UTR		0	0
hsa-miR-7114-5p	XM_017000680	NTNG1	6093	6111	1	-25.8	1	0.000453071	0.456	0	0	-5.38561	16	18	12	3UTR		0	0
hsa-miR-7114-5p	XM_017000680	NTNG1	2418	2441	1	-25.7	0	0.0245019	0.559	0	0	-5.69428	18	23	6	3UTR		0	0
hsa-miR-7114-3p	XM_017000680	NTNG1	3954	3970	1	-25.3	0	0.00493366	0.5	0	0	-6.51454	13	16	7	3UTR		0	0
hsa-miR-7150	XM_017000680	NTNG1	4349	4368	1	-23.6	1	0.00232521	0.574	0	0	-6.13885	15	19	7	3UTR		0	0
hsa-miR-7151-5p	XM_017000680	NTNG1	5877	5897	1	-22.1	1	0.000617482	0.647	0	0	-6.98189	16	20	11	3UTR		0	0
hsa-miR-7151-3p	XM_017000680	NTNG1	4168	4188	1	-21.5	0	0.00733281	0.529	0	0	-6.51454	15	20	11	3UTR		0	0
hsa-miR-7161-3p	XM_017000680	NTNG1	5987	6037	1	-24.7	0	0.0093398	0.485	0	0	-9.54977	21	26	11	3UTR		0	0
hsa-miR-7159-5p	XM_017000680	NTNG1	2796	2857	1	-20	1	0.00223985	0.603	0	0	-6.67474	14	19	11	3UTR		0	0
hsa-miR-7704	XM_017000680	NTNG1	2677	2704	1	-23.6	1	0.000683248	0.441	0	0	-4.79441	17	27	7	3UTR		0	0
hsa-miR-4433b-3p	XM_017000680	NTNG1	5522	5534	1	-26.7	0	0.35265	0.456	0	0	-13.6656	11	12	11	3UTR		0	0
hsa-miR-7847-3p	XM_017000680	NTNG1	6237	6258	1	-22.7	1	0.313845	0.618	0	0	-6.09222	16	21	7	3UTR		0	0
hsa-miR-7849-3p	XM_017000680	NTNG1	3890	3916	1	-18.9	1	0.026918	0.632	0	0	-3.93757	20	26	9	3UTR		0	0
hsa-miR-7850-5p	XM_017000680	NTNG1	2337	2357	1	-24.7	0	8.01e-06	0.368	0	0	-12.5059	16	20	10	3UTR		0	0
hsa-miR-7850-5p	XM_017000680	NTNG1	4020	4041	1	-24	0	7.41e-06	0.544	0	0	-8.76019	18	21	12	3UTR		0	0
hsa-miR-7978	XM_017000680	NTNG1	4453	4475	1	-19.8	1	8.56e-06	0.603	0	0	-9.63999	15	22	7	3UTR		0	0
hsa-miR-8052	XM_017000680	NTNG1	5095	5118	1	-22.8	0	0.000643277	0.544	0	0	-15.1559	16	23	9	3UTR		0	0
hsa-miR-8054	XM_017000680	NTNG1	2808	2828	1	-20.4	1	0.0322954	0.485	0	0	-11.254	15	20	9	3UTR		0	0
hsa-miR-8055	XM_017000680	NTNG1	4694	4715	1	-22.5	0	0.00471138	0.529	0	0	-10.603	17	21	14	3UTR		0	0
hsa-miR-8056	XM_017000680	NTNG1	3091	3109	1	-19.7	0	0.00097386	0.706	0	0	-7.48304	15	18	11	3UTR		0	0
hsa-miR-8057	XM_017000680	NTNG1	2576	2587	1	-17.7	0	0.000409681	0.529	0	0	-8.33988	10	11	10	3UTR		0	0
hsa-miR-8057	XM_017000680	NTNG1	4995	5013	1	-17.3	1	0.000200668	0.588	0	0	-6.28309	15	18	8	3UTR		0	0
hsa-miR-8071	XM_017000680	NTNG1	4364	4388	1	-24.8	1	0.0699295	0.544	0	0	-3.93757	20	24	8	3UTR		0	0
hsa-miR-8071	XM_017000680	NTNG1	2425	2446	1	-22.6	0	0.017992	0.544	0	0	-6.85796	16	21	9	3UTR		0	0
hsa-miR-8073	XM_017000680	NTNG1	2721	2746	1	-27.2	1	2.33e-06	0.559	0	0	-3.93757	18	20	16	3UTR		0	0
hsa-miR-8077	XM_017000680	NTNG1	6026	6048	1	-26.6	0	0.000199133	0.529	0	0	-6.62614	18	22	8	3UTR		0	0
hsa-miR-8077	XM_017000680	NTNG1	2419	2437	1	-24.8	1	0.233559	0.559	0	0	-6.24613	14	18	10	3UTR		0	0
hsa-miR-8085	XM_017000680	NTNG1	5462	5489	1	-25	1	0.0313023	0.515	0	0	-10.3422	17	19	17	3UTR		0	0
hsa-let-7a-5p	XM_017000683	NTNG1	3923	3943	1	-16.8	0	0.00222982	0.456	0	0	-8.03672	11	14	9	3UTR		0	0
hsa-let-7a-2-3p	XM_017000683	NTNG1	5518	5548	1	-26.8	0	1.66e-05	0.529	0	0	-8.30604	18	22	12	3UTR		0	0
hsa-let-7d-5p	XM_017000683	NTNG1	4088	4108	1	-22.3	0	0.0161645	0.559	0	0	-7.75139	16	20	6	3UTR		0	0
hsa-let-7d-3p	XM_017000683	NTNG1	3485	3500	1	-22.6	0	0.00195753	0.529	0	0	-20.1593	13	15	7	3UTR		0	0
hsa-let-7e-3p	XM_017000683	NTNG1	5501	5548	1	-24.8	0	1.66e-05	0.529	0	0	-8.31989	18	22	13	3UTR		0	0
hsa-miR-17-3p	XM_017000683	NTNG1	3779	3801	1	-19.8	0	0.0147669	0.603	0	0	-14.1648	16	22	10	3UTR		0	0
hsa-miR-18a-5p	XM_017000683	NTNG1	5724	5764	1	-24.3	0	0.000190288	0.471	0	0	-6.57398	19	22	11	3UTR		0	0
hsa-miR-18a-5p	XM_017000683	NTNG1	4410	4431	1	-21	1	0.0058764	0.544	0	0	-6.08354	18	21	12	3UTR		0	0
hsa-miR-22-3p	XM_017000683	NTNG1	5842	5866	1	-19.5	1	0.00166211	0.441	0	0	-4.76182	18	24	14	3UTR		1	0
hsa-miR-23a-5p	XM_017000683	NTNG1	5219	5239	1	-25.5	1	0.0102982	0.485	0	0	-9.2861	15	20	10	3UTR		0	0
hsa-miR-24-3p	XM_017000683	NTNG1	3149	3172	1	-24.6	1	7.57e-05	0.588	0	0	-4.957	20	23	10	3UTR		0	0
hsa-miR-25-5p	XM_017000683	NTNG1	3609	3659	1	-24	1	0.0140484	0.588	0	0	-3.93757	17	35	10	3UTR		0	0
hsa-miR-25-3p	XM_017000683	NTNG1	2682	2703	1	-22.2	1	0.000388183	0.515	0	0	-9.54631	17	21	7	3UTR		0	0
hsa-miR-26a-1-3p	XM_017000683	NTNG1	3675	3698	1	-19.9	0	0.000224648	0.529	0	0	-11.9403	18	23	8	3UTR		0	0
hsa-miR-26b-3p	XM_017000683	NTNG1	3480	3500	1	-20.1	1	0.00195753	0.529	0	0	-9.93282	18	20	16	3UTR		0	0
hsa-miR-33a-3p	XM_017000683	NTNG1	5907	5940	1	-25.9	0	0.0160561	0.618	0	0	-9.33931	16	19	9	3UTR		0	1
hsa-miR-29b-1-5p	XM_017000683	NTNG1	2502	2531	1	-20.9	0	0.000100753	0.5	0	0	-8.86514	18	22	12	3UTR		0	0
hsa-miR-103a-3p	XM_017000683	NTNG1	5847	5872	1	-23.8	0	0.0266954	0.441	0	0	-6.51454	20	25	10	3UTR		0	0
hsa-miR-105-5p	XM_017000683	NTNG1	4301	4318	1	-18.6	0	0.040511	0.691	0	0	-17.1102	13	17	11	3UTR		0	0
hsa-miR-107	XM_017000683	NTNG1	5852	5872	1	-23.7	0	0.0266954	0.441	0	0	-6.51454	17	20	10	3UTR		0	0
hsa-miR-208a-5p	XM_017000683	NTNG1	5579	5610	1	-21.5	1	0.00113561	0.588	0	0	-3.93757	17	31	9	3UTR		0	0
hsa-miR-129-1-3p	XM_017000683	NTNG1	4851	4869	1	-17.8	1	0.000139527	0.544	0	0	-5.9255	12	18	8	3UTR		0	0
hsa-miR-148a-3p	XM_017000683	NTNG1	3129	3170	1	-18.9	0	6.74e-05	0.588	0	0	-7.08104	14	17	9	3UTR		0	0
hsa-miR-139-5p	XM_017000683	NTNG1	5398	5425	1	-24.1	1	0.00190405	0.485	0	0	-7.00542	18	21	9	3UTR		0	0
hsa-miR-181b-5p	XM_017000683	NTNG1	2219	2234	1	-20.2	0	0.00867054	0.588	0	0	-20.4803	13	15	7	3UTR		0	0
hsa-miR-183-3p	XM_017000683	NTNG1	5694	5717	1	-18.7	0	0.00404903	0.5	0	0	-5.83853	17	23	6	3UTR		0	0
hsa-miR-187-3p	XM_017000683	NTNG1	2339	2365	1	-22.5	0	0.0107757	0.529	0	0	-7.0388	18	26	10	3UTR		0	0
hsa-miR-203a-3p	XM_017000683	NTNG1	5391	5419	1	-19.2	0	0.00043796	0.471	0	0	-10.4313	17	22	12	3UTR		0	0
hsa-miR-205-3p	XM_017000683	NTNG1	3116	3158	1	-19.9	0	0.286166	0.544	0	0	-8.76019	16	20	14	3UTR		0	0
hsa-miR-210-5p	XM_017000683	NTNG1	2441	2494	1	-25.2	1	0.000479282	0.588	0	0	-7.14013	20	53	10	3UTR		0	0
hsa-miR-210-3p	XM_017000683	NTNG1	5258	5277	1	-23.7	1	0.406768	0.441	0	0	-9.2861	14	19	10	3UTR		0	0
hsa-miR-211-5p	XM_017000683	NTNG1	5351	5374	1	-26.3	1	9.02e-05	0.426	0	0	-4.957	19	23	10	3UTR		0	0
hsa-miR-211-3p	XM_017000683	NTNG1	2437	2485	1	-24.5	0	1.57e-05	0.559	0	0	-11.8241	18	23	15	3UTR		0	0
hsa-miR-214-3p	XM_017000683	NTNG1	2512	2532	1	-24.8	1	0.00248312	0.515	0	0	-8.02485	16	20	10	3UTR		0	0
hsa-miR-216a-3p	XM_017000683	NTNG1	5392	5424	1	-22	1	0.00159315	0.485	0	0	-5.18008	16	21	9	3UTR		0	0
hsa-miR-221-3p	XM_017000683	NTNG1	2157	2181	1	-21.3	0	0.0155726	0.544	0	0	-7.24999	15	19	11	3UTR		0	0
hsa-miR-223-5p	XM_017000683	NTNG1	2468	2487	1	-18.9	1	2.37e-05	0.559	0	0	-5.08246	17	19	14	3UTR		0	0
hsa-miR-200b-5p	XM_017000683	NTNG1	3597	3637	1	-23.8	0	0.00445843	0.662	0	0	-9.69585	16	18	16	3UTR		0	0
hsa-miR-200b-3p	XM_017000683	NTNG1	2288	2320	1	-19.6	0	0.000198018	0.559	0	0	-13.6656	16	20	12	3UTR		0	0
hsa-miR-15b-5p	XM_017000683	NTNG1	4081	4098	1	-18.9	1	0.000542431	0.529	0	0	-13.2745	15	17	11	3UTR		0	0
hsa-miR-23b-3p	XM_017000683	NTNG1	4624	4654	1	-20.4	1	0.00234103	0.706	0	0	-3.93757	16	20	10	3UTR		0	0
hsa-miR-125b-1-3p	XM_017000683	NTNG1	2511	2537	1	-23.7	0	0.00369268	0.515	0	0	-7.9845	18	26	6	3UTR		0	0
hsa-miR-138-5p	XM_017000683	NTNG1	4444	4466	1	-22.8	1	0.000848085	0.544	0	0	-5.9255	17	22	9	3UTR		0	0
hsa-miR-141-3p	XM_017000683	NTNG1	2164	2180	1	-17.9	1	0.0149896	0.544	0	0	-5.9255	12	15	10	3UTR		0	0
hsa-miR-153-5p	XM_017000683	NTNG1	2339	2369	1	-19.3	0	0.0537012	0.559	0	0	-11.6667	19	30	10	3UTR		0	0
hsa-miR-125a-5p	XM_017000683	NTNG1	3484	3502	1	-20.8	0	0.00155467	0.544	0	0	-9.81978	15	18	9	3UTR		0	0
hsa-miR-125b-2-3p	XM_017000683	NTNG1	5396	5415	1	-22.9	0	0.000905153	0.485	0	0	-8.40165	15	19	9	3UTR		0	0
hsa-miR-127-3p	XM_017000683	NTNG1	2075	2094	1	-22.8	0	1.19e-05	0.382	0	0	-10.1659	16	19	11	3UTR		0	0
hsa-miR-129-2-3p	XM_017000683	NTNG1	4851	4869	1	-17.8	1	0.000139527	0.544	0	0	-5.9255	12	18	8	3UTR		0	0
hsa-miR-138-1-3p	XM_017000683	NTNG1	5394	5414	1	-25	1	0.000709122	0.485	0	0	-13.2279	16	20	9	3UTR		0	0
hsa-miR-150-5p	XM_017000683	NTNG1	3949	3973	1	-23	0	1.82e-07	0.5	0	0	-8.02794	17	24	6	3UTR		0	0
hsa-miR-150-3p	XM_017000683	NTNG1	2082	2101	1	-28	1	1.3e-05	0.382	0	0	-4.76182	15	19	13	3UTR		0	0
hsa-miR-188-3p	XM_017000683	NTNG1	5095	5117	1	-20.2	0	0.000107103	0.574	0	0	-8.02599	16	22	11	3UTR		0	0
hsa-miR-193a-5p	XM_017000683	NTNG1	5179	5198	1	-24	1	0.00197773	0.485	0	0	-8.00486	16	19	9	3UTR		0	0
hsa-miR-320a	XM_017000683	NTNG1	2543	2564	1	-21.6	1	0.0322954	0.485	0	0	-4.65016	19	21	14	3UTR		0	0
hsa-miR-128-2-5p	XM_017000683	NTNG1	2167	2197	1	-21.5	0	0.0837291	0.544	0	0	-8.32703	16	30	8	3UTR		0	0
hsa-miR-194-3p	XM_017000683	NTNG1	3791	3811	1	-24.9	0	0.00703663	0.588	0	0	-8.05661	17	20	10	3UTR		0	0
hsa-miR-106b-3p	XM_017000683	NTNG1	2681	2702	1	-23.9	1	0.000100961	0.515	0	0	-10.0219	16	21	9	3UTR		0	0
hsa-miR-30c-1-3p	XM_017000683	NTNG1	5173	5226	1	-24.1	1	0.0408152	0.515	0	0	-4.90607	14	16	14	3UTR		0	0
hsa-miR-200a-3p	XM_017000683	NTNG1	2828	2849	1	-21.5	0	0.00259119	0.676	0	0	-5.83853	17	21	12	3UTR		0	0
hsa-miR-200a-3p	XM_017000683	NTNG1	2158	2180	1	-17.9	1	0.0149896	0.544	0	0	-5.9255	12	15	10	3UTR		0	0
hsa-miR-302a-3p	XM_017000683	NTNG1	2217	2235	1	-20.8	0	0.00852985	0.574	0	0	-7.48304	16	18	11	3UTR		0	0
hsa-miR-299-3p	XM_017000683	NTNG1	4098	4112	1	-17.6	1	0.0529081	0.559	0	0	-5.81821	12	14	7	3UTR		0	0
hsa-miR-296-5p	XM_017000683	NTNG1	5527	5541	1	-23.9	1	3.23e-05	0.485	0	0	-6.78234	11	14	7	3UTR		0	0
hsa-miR-363-5p	XM_017000683	NTNG1	4643	4660	1	-19.1	1	0.00658544	0.691	0	0	-4.65016	15	17	12	3UTR		0	0
hsa-miR-365a-5p	XM_017000683	NTNG1	5831	5860	1	-24.4	0	0.000495396	0.456	0	0	-10.3702	20	29	11	3UTR		0	0
hsa-miR-365b-5p	XM_017000683	NTNG1	5752	5776	1	-27.5	1	0.028751	0.485	0	0	-3.93757	19	24	10	3UTR		0	0
hsa-miR-302c-3p	XM_017000683	NTNG1	3947	3967	1	-20	0	2.73e-05	0.471	0	0	-14.7943	17	20	11	3UTR		0	0
hsa-miR-367-5p	XM_017000683	NTNG1	3766	3801	1	-21.6	1	0.0147669	0.603	0	0	-3.79332	15	17	15	3UTR		0	0
hsa-miR-369-5p	XM_017000683	NTNG1	5729	5748	1	-17.5	1	1.97e-05	0.485	0	0	-4.90607	14	19	9	3UTR		0	0
hsa-miR-377-5p	XM_017000683	NTNG1	3213	3237	1	-20.7	1	0.00497892	0.603	0	0	-6.76235	19	24	9	3UTR		0	0
hsa-miR-378a-3p	XM_017000683	NTNG1	5194	5215	1	-23.6	0	0.00478103	0.515	0	0	-8.70704	17	21	10	3UTR		0	0
hsa-miR-330-5p	XM_017000683	NTNG1	5133	5153	1	-23.9	1	0.00392923	0.544	0	0	-5.22701	18	20	14	3UTR		0	0
hsa-miR-330-5p	XM_017000683	NTNG1	4837	4857	1	-22.9	1	0.00324593	0.574	0	0	-6.9638	18	20	12	3UTR		0	0
hsa-miR-328-3p	XM_017000683	NTNG1	5515	5543	1	-25.6	1	2.38e-05	0.5	0	0	-5.18008	17	28	9	3UTR		0	0
hsa-miR-342-3p	XM_017000683	NTNG1	5370	5387	1	-24.6	1	0.000159623	0.382	0	0	-11.1852	15	17	9	3UTR		0	0
hsa-miR-342-3p	XM_017000683	NTNG1	3150	3165	1	-19.8	1	0.000552635	0.603	0	0	-4.957	14	15	14	3UTR		0	0
hsa-miR-326	XM_017000683	NTNG1	3475	3501	1	-25.4	0	0.00146585	0.529	0	0	-7.65065	17	26	8	3UTR		0	0
hsa-miR-326	XM_017000683	NTNG1	5394	5412	1	-23.3	1	0.000348572	0.485	0	0	-6.90779	13	18	11	3UTR		0	0
hsa-miR-135b-5p	XM_017000683	NTNG1	4852	4865	1	-18.1	0	0.00342652	0.544	0	0	-9.54656	12	13	12	3UTR		1	1
hsa-miR-135b-3p	XM_017000683	NTNG1	4934	4957	1	-21.1	1	0.0020456	0.662	0	0	-7.28438	18	23	11	3UTR		0	0
hsa-miR-148b-3p	XM_017000683	NTNG1	5913	5933	1	-20.1	1	0.0430588	0.559	0	0	-6.76235	18	20	15	3UTR		0	0
hsa-miR-148b-3p	XM_017000683	NTNG1	3148	3170	1	-18.9	0	6.74e-05	0.588	0	0	-6.89492	14	17	9	3UTR		0	0
hsa-miR-331-3p	XM_017000683	NTNG1	5358	5406	1	-30.5	0	3.57e-08	0.485	0	0	-5.83853	15	19	6	3UTR		0	0
hsa-miR-324-3p	XM_017000683	NTNG1	5723	5742	1	-25.1	0	0.000317523	0.5	0	0	-6.51454	16	19	10	3UTR		0	0
hsa-miR-339-3p	XM_017000683	NTNG1	4444	4465	1	-25.7	0	0.00128142	0.559	0	0	-13.4406	18	21	12	3UTR		0	0
hsa-miR-345-5p	XM_017000683	NTNG1	5394	5413	1	-25.7	0	0.00052424	0.471	0	0	-13.6138	15	19	9	3UTR		0	0
hsa-miR-345-5p	XM_017000683	NTNG1	5348	5368	1	-25.5	0	7.51e-06	0.471	0	0	-9.79437	16	20	9	3UTR		0	0
hsa-miR-346	XM_017000683	NTNG1	3689	3711	1	-26.1	0	0.232624	0.5	0	0	-10.2048	18	22	10	3UTR		0	0
hsa-miR-423-3p	XM_017000683	NTNG1	5530	5556	1	-23.7	0	0.0173421	0.5	0	0	-9.86134	18	26	10	3UTR		0	0
hsa-miR-18b-5p	XM_017000683	NTNG1	5745	5764	1	-20.8	0	0.000190288	0.471	0	0	-6.57398	17	19	11	3UTR		0	0
hsa-miR-18b-3p	XM_017000683	NTNG1	3686	3707	1	-22.8	0	0.00525994	0.515	0	0	-9.18387	16	21	5	3UTR		0	0
hsa-miR-20b-3p	XM_017000683	NTNG1	4080	4098	1	-20.7	0	0.000542431	0.529	0	0	-6.74759	14	18	12	3UTR		0	0
hsa-miR-20b-3p	XM_017000683	NTNG1	6041	6061	1	-19.5	1	0.00678056	0.574	0	0	-5.19005	18	20	10	3UTR		0	0
hsa-miR-429	XM_017000683	NTNG1	2166	2180	1	-15.9	1	0.0149896	0.544	0	0	-5.9255	12	14	10	3UTR		0	0
hsa-miR-450a-1-3p	XM_017000683	NTNG1	3715	3761	1	-17.7	1	0.0173168	0.574	0	0	-12.4965	13	19	8	3UTR		0	0
hsa-miR-433-5p	XM_017000683	NTNG1	4260	4277	1	-21.1	0	0.00472757	0.706	0	0	-8.33988	10	12	10	3UTR		0	0
hsa-miR-433-3p	XM_017000683	NTNG1	5747	5772	1	-22	0	0.00296355	0.485	0	0	-8.25873	19	25	8	3UTR		0	0
hsa-miR-329-5p	XM_017000683	NTNG1	5229	5249	1	-21.4	0	0.00055247	0.471	0	0	-9.81332	16	20	13	3UTR		0	0
hsa-miR-412-3p	XM_017000683	NTNG1	5527	5543	1	-22.8	0	2.38e-05	0.5	0	0	-17.8457	14	16	13	3UTR		0	0
hsa-miR-483-5p	XM_017000683	NTNG1	2890	2910	1	-20.9	1	0.00727455	0.632	0	0	-5.41313	18	20	9	3UTR		0	0
hsa-miR-483-3p	XM_017000683	NTNG1	3485	3512	1	-22.2	1	0.0300814	0.574	0	0	-6.76235	19	27	6	3UTR		0	0
hsa-miR-483-3p	XM_017000683	NTNG1	3680	3705	1	-21.9	1	0.00477556	0.485	0	0	-5.52986	19	25	8	3UTR		0	0
hsa-miR-483-3p	XM_017000683	NTNG1	5493	5510	1	-22	0	0.111023	0.441	0	0	-7.57093	14	17	9	3UTR		0	0
hsa-miR-483-3p	XM_017000683	NTNG1	3955	3974	1	-21.3	0	4.79e-07	0.515	0	0	-8.84192	16	19	10	3UTR		0	0
hsa-miR-486-3p	XM_017000683	NTNG1	4087	4106	1	-26.9	1	0.00353243	0.574	0	0	-6.09222	16	19	9	3UTR		0	0
hsa-miR-487a-5p	XM_017000683	NTNG1	3692	3714	1	-22.3	0	0.000174417	0.5	0	0	-6.50069	17	22	6	3UTR		0	0
hsa-miR-489-5p	XM_017000683	NTNG1	2140	2161	1	-18.1	1	0.53156	0.588	0	0	-5.61866	14	21	9	3UTR		0	0
hsa-miR-490-3p	XM_017000683	NTNG1	5676	5709	1	-34.4	1	0.000119166	0.559	0	0	-4.957	19	23	16	3UTR		0	0
hsa-miR-146b-3p	XM_017000683	NTNG1	2682	2706	1	-24.9	0	0.00155536	0.5	0	0	-7.38222	18	24	10	3UTR		0	0
hsa-miR-146b-3p	XM_017000683	NTNG1	4845	4870	1	-21.8	0	0.000420006	0.559	0	0	-10.9622	17	25	10	3UTR		0	0
hsa-miR-432-5p	XM_017000683	NTNG1	2436	2457	1	-21.7	0	0.000676335	0.456	0	0	-12.9282	17	21	11	3UTR		0	0
hsa-miR-494-5p	XM_017000683	NTNG1	3689	3715	1	-22.7	0	0.000186434	0.485	0	0	-10.4278	20	26	11	3UTR		0	0
hsa-miR-193b-5p	XM_017000683	NTNG1	2421	2440	1	-20.6	1	0.000683248	0.441	0	0	-8.55011	13	19	7	3UTR		0	0
hsa-miR-512-5p	XM_017000683	NTNG1	5393	5414	1	-22.8	0	0.000709122	0.485	0	0	-9.18534	17	21	12	3UTR		0	0
hsa-miR-512-5p	XM_017000683	NTNG1	5751	5783	1	-22.1	0	0.000185172	0.529	0	0	-6.51454	19	32	14	3UTR		0	0
hsa-miR-520f-3p	XM_017000683	NTNG1	2640	2660	1	-21.3	0	0.0230435	0.515	0	0	-7.98902	17	20	11	3UTR		0	0
hsa-miR-519c-5p	XM_017000683	NTNG1	5826	5864	1	-19.7	0	0.000982227	0.456	0	0	-13.0295	16	38	9	3UTR		0	0
hsa-miR-519c-5p	XM_017000683	NTNG1	5292	5308	1	-19.5	1	1.91e-09	0.471	0	0	-10.966	15	16	15	3UTR		0	0
hsa-miR-519c-3p	XM_017000683	NTNG1	4389	4430	1	-21.6	1	0.00139902	0.559	0	0	-3.93757	20	23	13	3UTR		0	0
hsa-miR-520a-3p	XM_017000683	NTNG1	3683	3700	1	-22.2	0	0.000809196	0.529	0	0	-9.54656	16	17	16	3UTR		0	0
hsa-miR-519b-5p	XM_017000683	NTNG1	5826	5864	1	-19.7	0	0.000982227	0.456	0	0	-13.0295	16	38	9	3UTR		0	0
hsa-miR-519b-5p	XM_017000683	NTNG1	5292	5308	1	-19.5	1	1.91e-09	0.471	0	0	-10.966	15	16	15	3UTR		0	0
hsa-miR-525-5p	XM_017000683	NTNG1	5369	5388	1	-23.6	0	0.000121432	0.397	0	0	-8.00792	16	19	11	3UTR		0	0
hsa-miR-525-5p	XM_017000683	NTNG1	5292	5308	1	-21.7	1	1.91e-09	0.471	0	0	-10.8446	14	16	10	3UTR		0	0
hsa-miR-523-5p	XM_017000683	NTNG1	5826	5864	1	-19.7	0	0.000982227	0.456	0	0	-13.0295	16	38	9	3UTR		0	0
hsa-miR-523-5p	XM_017000683	NTNG1	5292	5308	1	-19.5	1	1.91e-09	0.471	0	0	-10.966	15	16	15	3UTR		0	0
hsa-miR-523-3p	XM_017000683	NTNG1	2090	2110	1	-20.8	0	1.43e-05	0.426	0	0	-15.5666	14	20	10	3UTR		0	0
hsa-miR-520b	XM_017000683	NTNG1	2640	2660	1	-20.7	0	0.0230435	0.515	0	0	-10.6336	17	20	11	3UTR		0	0
hsa-miR-520c-3p	XM_017000683	NTNG1	5297	5327	1	-20.8	0	0.00160394	0.456	0	0	-9.54656	17	30	10	3UTR		0	0
hsa-miR-517a-3p	XM_017000683	NTNG1	6030	6052	1	-23.5	0	0.00184793	0.574	0	0	-10.6336	18	22	10	3UTR		0	0
hsa-miR-520d-3p	XM_017000683	NTNG1	2708	2729	1	-20.9	0	0.00155042	0.574	0	0	-14.722	16	21	8	3UTR		0	0
hsa-miR-517b-3p	XM_017000683	NTNG1	6030	6052	1	-23.5	0	0.00184793	0.574	0	0	-10.6336	18	22	10	3UTR		0	0
hsa-miR-520g-3p	XM_017000683	NTNG1	6030	6053	1	-20.8	0	0.0020231	0.574	0	0	-12.3328	18	23	10	3UTR		0	0
hsa-miR-516b-3p	XM_017000683	NTNG1	5297	5327	1	-22.9	1	0.00160394	0.456	0	0	-3.93757	17	30	10	3UTR		0	0
hsa-miR-518e-5p	XM_017000683	NTNG1	5826	5864	1	-19.7	0	0.000982227	0.456	0	0	-13.0295	16	38	9	3UTR		0	0
hsa-miR-518e-5p	XM_017000683	NTNG1	5292	5308	1	-19.5	1	1.91e-09	0.471	0	0	-10.966	15	16	15	3UTR		0	0
hsa-miR-518e-3p	XM_017000683	NTNG1	6031	6053	1	-20.9	0	0.0020231	0.574	0	0	-11.3897	17	22	9	3UTR		0	0
hsa-miR-517c-3p	XM_017000683	NTNG1	6030	6052	1	-21.8	0	0.00184793	0.574	0	0	-10.6336	18	22	10	3UTR		0	0
hsa-miR-522-5p	XM_017000683	NTNG1	5826	5864	1	-19.7	0	0.000982227	0.456	0	0	-13.0295	16	38	9	3UTR		0	0
hsa-miR-522-5p	XM_017000683	NTNG1	5292	5308	1	-19.5	1	1.91e-09	0.471	0	0	-10.966	15	16	15	3UTR		0	0
hsa-miR-519a-5p	XM_017000683	NTNG1	5826	5864	1	-19.7	0	0.000982227	0.456	0	0	-13.0295	16	38	9	3UTR		0	0
hsa-miR-519a-5p	XM_017000683	NTNG1	5292	5308	1	-19.5	1	1.91e-09	0.471	0	0	-10.966	15	16	15	3UTR		0	0
hsa-miR-516a-3p	XM_017000683	NTNG1	5297	5327	1	-22.9	1	0.00160394	0.456	0	0	-3.93757	17	30	10	3UTR		0	0
hsa-miR-500a-3p	XM_017000683	NTNG1	2441	2487	1	-24.5	1	2.37e-05	0.559	0	0	-3.93757	17	21	9	3UTR		0	0
hsa-miR-502-3p	XM_017000683	NTNG1	2448	2488	1	-26	1	2.9e-05	0.544	0	0	-3.93757	18	22	10	3UTR		0	1
hsa-miR-502-3p	XM_017000683	NTNG1	3620	3639	1	-21.1	1	0.00538332	0.662	0	0	-5.81384	16	19	7	3UTR		0	1
hsa-miR-503-5p	XM_017000683	NTNG1	2313	2346	1	-21.7	0	0.000326367	0.5	0	0	-15.7411	16	33	9	3UTR		0	0
hsa-miR-508-5p	XM_017000683	NTNG1	5370	5414	1	-23.8	1	0.000709122	0.485	0	0	-4.79441	19	44	8	3UTR		0	0
hsa-miR-514a-5p	XM_017000683	NTNG1	4778	4801	1	-19.8	0	0.0276868	0.618	0	0	-9.54656	17	23	13	3UTR		0	0
hsa-miR-532-5p	XM_017000683	NTNG1	4888	4909	1	-20.1	0	0.0287643	0.676	0	0	-8.93978	17	21	11	3UTR		0	0
hsa-miR-455-3p	XM_017000683	NTNG1	2220	2233	1	-19.9	0	0.0124688	0.574	0	0	-8.60958	11	13	9	3UTR		0	0
hsa-miR-487b-3p	XM_017000683	NTNG1	6043	6057	1	-21	0	0.00584583	0.588	0	0	-10.8357	13	14	13	3UTR		0	0
hsa-miR-551a	XM_017000683	NTNG1	3478	3497	1	-24.8	0	0.00189521	0.529	0	0	-11.8972	16	19	11	3UTR		0	0
hsa-miR-552-3p	XM_017000683	NTNG1	2628	2674	1	-19.8	1	0.0577428	0.456	0	0	-4.02637	14	20	9	3UTR		0	0
hsa-miR-92b-5p	XM_017000683	NTNG1	2519	2541	1	-28.1	1	0.00639343	0.5	0	0	-6.9954	19	22	14	3UTR		0	0
hsa-miR-92b-3p	XM_017000683	NTNG1	5527	5547	1	-22.7	0	1.33e-05	0.515	0	0	-9.65801	16	20	10	3UTR		0	0
hsa-miR-92b-3p	XM_017000683	NTNG1	3729	3749	1	-21.5	0	0.00167636	0.544	0	0	-9.16322	15	20	6	3UTR		0	0
hsa-miR-555	XM_017000683	NTNG1	5820	5860	1	-21.6	0	0.000495396	0.456	0	0	-6.80703	13	16	8	3UTR		0	0
hsa-miR-555	XM_017000683	NTNG1	5045	5063	1	-20.8	0	0.00375399	0.721	0	0	-5.69428	16	18	14	3UTR		0	0
hsa-miR-570-5p	XM_017000683	NTNG1	2334	2353	1	-22.7	0	5.42e-06	0.544	0	0	-10.3719	16	19	13	3UTR		0	0
hsa-miR-571	XM_017000683	NTNG1	4198	4222	1	-21.3	0	7.66e-05	0.588	0	0	-5.72816	16	19	10	3UTR		0	0
hsa-miR-573	XM_017000683	NTNG1	3110	3150	1	-19.2	1	0.00152963	0.559	0	0	-4.65016	17	21	8	3UTR		0	0
hsa-miR-574-5p	XM_017000683	NTNG1	2135	2157	1	-23.3	0	0.276025	0.574	0	0	-6.74759	17	22	12	3UTR		0	0
hsa-miR-578	XM_017000683	NTNG1	5327	5364	1	-23	1	8.16e-07	0.485	0	0	-6.76235	20	24	15	3UTR		0	0
hsa-miR-581	XM_017000683	NTNG1	3468	3490	1	-18.7	0	3.03e-07	0.515	0	0	-6.07158	14	16	14	3UTR		0	0
hsa-miR-582-5p	XM_017000683	NTNG1	5895	5947	1	-27	1	0.000646085	0.632	0	0	-6.08354	17	21	12	3UTR		0	0
hsa-miR-585-3p	XM_017000683	NTNG1	2402	2427	1	-21.4	1	2e-05	0.441	0	0	-11.254	15	17	15	3UTR		0	0
hsa-miR-548a-3p	XM_017000683	NTNG1	3277	3322	1	-16.8	0	0.0186875	0.706	0	0	-15.5666	12	14	12	3UTR		0	0
hsa-miR-588	XM_017000683	NTNG1	4199	4219	1	-19.3	1	5.79e-05	0.588	0	0	-8.06181	11	15	8	3UTR		0	0
hsa-miR-589-3p	XM_017000683	NTNG1	5531	5556	1	-21.4	0	0.0173421	0.5	0	0	-16.9706	16	25	9	3UTR		0	0
hsa-miR-591	XM_017000683	NTNG1	5864	5901	1	-20.9	1	1.37e-05	0.544	0	0	-5.76291	13	15	13	3UTR		0	0
hsa-miR-595	XM_017000683	NTNG1	4464	4487	1	-22.4	1	0.0547174	0.588	0	0	-6.03692	17	23	9	3UTR		0	0
hsa-miR-596	XM_017000683	NTNG1	3474	3500	1	-24.8	0	0.00195753	0.529	0	0	-7.80367	17	26	8	3UTR		0	0
hsa-miR-598-5p	XM_017000683	NTNG1	5724	5750	1	-22.4	1	2.72e-06	0.485	0	0	-5.52986	19	26	9	3UTR		0	0
hsa-miR-601	XM_017000683	NTNG1	5205	5228	1	-24.4	0	0.113199	0.529	0	0	-12.6723	17	23	10	3UTR		0	0
hsa-miR-611	XM_017000683	NTNG1	5158	5185	1	-27.6	0	0.000141634	0.5	0	0	-7.07355	18	27	6	3UTR		0	0
hsa-miR-615-5p	XM_017000683	NTNG1	5526	5541	1	-26.4	0	3.23e-05	0.485	0	0	-7.37138	14	15	14	3UTR		0	0
hsa-miR-615-3p	XM_017000683	NTNG1	5169	5190	1	-25.1	0	3.2e-05	0.515	0	0	-9.60059	18	21	12	3UTR		0	0
hsa-miR-618	XM_017000683	NTNG1	3686	3707	1	-20.5	0	0.00525994	0.515	0	0	-6.51454	18	21	11	3UTR		0	0
hsa-miR-619-5p	XM_017000683	NTNG1	4080	4102	1	-23	0	0.0016182	0.544	0	0	-9.70971	17	22	9	3UTR		0	0
hsa-miR-621	XM_017000683	NTNG1	4079	4099	1	-22.8	0	0.000852336	0.544	0	0	-10.5724	18	20	12	3UTR		0	0
hsa-miR-624-5p	XM_017000683	NTNG1	2488	2511	1	-18.2	0	0.0388422	0.485	0	0	-10.9252	17	23	11	3UTR		0	0
hsa-miR-627-3p	XM_017000683	NTNG1	3838	3851	1	-17.3	0	0.000768367	0.632	0	0	-13.6656	12	13	12	3UTR		0	0
hsa-miR-629-3p	XM_017000683	NTNG1	5902	5939	1	-19.9	1	0.0176715	0.603	0	0	-8.97335	16	21	9	3UTR		0	0
hsa-miR-33b-3p	XM_017000683	NTNG1	5737	5759	1	-27.6	1	0.000271442	0.471	0	0	-5.9255	17	22	7	3UTR		0	0
hsa-miR-637	XM_017000683	NTNG1	2314	2356	1	-28.9	0	1.45e-05	0.559	0	0	-10.0748	18	42	8	3UTR		0	0
hsa-miR-642a-5p	XM_017000683	NTNG1	3464	3502	1	-23.2	1	0.00155467	0.544	0	0	-11.254	18	38	9	3UTR		0	0
hsa-miR-644a	XM_017000683	NTNG1	2184	2201	1	-20.5	0	0.0254706	0.544	0	0	-11.0886	14	17	11	3UTR		0	0
hsa-miR-650	XM_017000683	NTNG1	3597	3630	1	-26	0	0.0642769	0.632	0	0	-9.54656	16	33	8	3UTR		0	0
hsa-miR-652-5p	XM_017000683	NTNG1	5293	5311	1	-26.5	1	4.53e-10	0.471	0	0	-7.39609	16	18	10	3UTR		0	0
hsa-miR-662	XM_017000683	NTNG1	5517	5538	1	-22.7	1	7.5e-06	0.485	0	0	-4.99396	15	21	7	3UTR		0	0
hsa-miR-654-5p	XM_017000683	NTNG1	5841	5859	1	-22.1	0	0.000898817	0.456	0	0	-12.8934	15	18	8	3UTR		0	0
hsa-miR-658	XM_017000683	NTNG1	2522	2541	1	-26.8	0	0.00639343	0.5	0	0	-7.0388	17	19	12	3UTR		0	0
hsa-miR-659-3p	XM_017000683	NTNG1	5173	5198	1	-25.1	1	0.00197773	0.485	0	0	-8.3038	18	25	9	3UTR		0	0
hsa-miR-758-3p	XM_017000683	NTNG1	5813	5829	1	-18	0	0.00528453	0.471	0	0	-8.49178	13	16	8	3UTR		0	0
hsa-miR-671-3p	XM_017000683	NTNG1	5394	5411	1	-25.2	0	2.64e-05	0.485	0	0	-5.83853	15	17	10	3UTR		0	0
hsa-miR-668-3p	XM_017000683	NTNG1	5350	5369	1	-22.6	1	8.09e-06	0.456	0	0	-8.38244	15	19	8	3UTR		0	0
hsa-miR-668-3p	XM_017000683	NTNG1	4196	4216	1	-21.2	1	3.12e-05	0.574	0	0	-7.14013	15	20	7	3UTR		0	0
hsa-miR-767-5p	XM_017000683	NTNG1	3221	3240	1	-22	0	0.0105425	0.632	0	0	-13.8149	16	19	12	3UTR		0	0
hsa-miR-1224-3p	XM_017000683	NTNG1	3652	3707	1	-28.9	1	0.00525994	0.515	0	0	-4.17062	15	18	8	3UTR		0	0
hsa-miR-1301-5p	XM_017000683	NTNG1	5398	5414	1	-23.7	1	0.000709122	0.485	0	0	-7.61919	15	16	15	3UTR		0	0
hsa-miR-1185-2-3p	XM_017000683	NTNG1	2659	2678	1	-21.5	1	0.0681694	0.471	0	0	-8.57351	15	19	11	3UTR		0	0
hsa-miR-449c-3p	XM_017000683	NTNG1	3683	3708	1	-24.4	0	0.0091854	0.529	0	0	-10.3856	20	25	11	3UTR		0	0
hsa-miR-449c-3p	XM_017000683	NTNG1	2265	2301	1	-21.4	1	0.0292107	0.544	0	0	-3.93757	19	36	8	3UTR		0	0
hsa-miR-766-3p	XM_017000683	NTNG1	5378	5413	1	-29	1	0.00052424	0.471	0	0	-6.08354	16	21	6	3UTR		0	0
hsa-miR-378d	XM_017000683	NTNG1	5197	5215	1	-21.9	0	0.00478103	0.515	0	0	-8.70704	15	18	10	3UTR		0	0
hsa-miR-378d	XM_017000683	NTNG1	5834	5852	1	-21.8	1	0.000743983	0.426	0	0	-4.65016	16	18	9	3UTR		0	0
hsa-miR-670-5p	XM_017000683	NTNG1	4452	4475	1	-21	1	0.00175007	0.529	0	0	-5.22671	17	23	14	3UTR		0	0
hsa-miR-670-5p	XM_017000683	NTNG1	3399	3419	1	-19.8	1	0.000385429	0.618	0	0	-6.76235	18	20	12	3UTR		0	0
hsa-miR-2113	XM_017000683	NTNG1	5512	5549	1	-20.9	1	2.34e-05	0.529	0	0	-4.84971	17	21	14	3UTR		0	0
hsa-miR-761	XM_017000683	NTNG1	3928	3942	1	-26.4	1	0.00196423	0.471	0	0	-5.76291	13	14	13	3UTR		0	0
hsa-miR-764	XM_017000683	NTNG1	3691	3719	1	-25.4	0	0.000783571	0.5	0	0	-5.71431	20	28	14	3UTR		0	0
hsa-miR-675-3p	XM_017000683	NTNG1	5527	5548	1	-23	1	1.66e-05	0.529	0	0	-5.02746	17	21	7	3UTR		0	0
hsa-miR-891a-3p	XM_017000683	NTNG1	2112	2135	1	-21.6	1	0.0199802	0.515	0	0	-6.25121	19	23	7	3UTR		0	0
hsa-miR-300	XM_017000683	NTNG1	5751	5764	1	-18	0	0.000190288	0.471	0	0	-11.6925	11	13	8	3UTR		0	0
hsa-miR-892a	XM_017000683	NTNG1	3475	3499	1	-19.3	0	0.00108061	0.529	0	0	-6.50069	15	18	11	3UTR		0	0
hsa-miR-450b-5p	XM_017000683	NTNG1	3080	3101	1	-21.2	1	0.000397251	0.632	0	0	-4.957	18	21	9	3UTR		0	0
hsa-miR-892b	XM_017000683	NTNG1	3482	3500	1	-22.2	0	0.00195753	0.529	0	0	-9.30909	15	18	10	3UTR		0	0
hsa-miR-708-3p	XM_017000683	NTNG1	2267	2286	1	-19.9	0	5.73e-06	0.574	0	0	-11.6594	17	19	10	3UTR		0	0
hsa-miR-744-5p	XM_017000683	NTNG1	2416	2441	1	-23.7	1	0.000226706	0.441	0	0	-4.76182	17	25	7	3UTR		0	0
hsa-miR-885-5p	XM_017000683	NTNG1	3692	3708	1	-19.3	0	0.0091854	0.529	0	0	-19.1924	15	16	15	3UTR		0	0
hsa-miR-885-3p	XM_017000683	NTNG1	3924	3943	1	-28.2	1	0.00222982	0.456	0	0	-5.61866	16	19	12	3UTR		0	0
hsa-miR-887-5p	XM_017000683	NTNG1	5568	5595	1	-24.2	1	5.04e-05	0.588	0	0	-7.28438	17	22	11	3UTR		0	0
hsa-miR-665	XM_017000683	NTNG1	5303	5322	1	-27.7	1	6.4e-05	0.471	0	0	-6.82767	15	19	7	3UTR		0	0
hsa-miR-873-5p	XM_017000683	NTNG1	5319	5339	1	-22.4	0	0.00523478	0.456	0	0	-9.79662	15	20	6	3UTR		0	0
hsa-miR-921	XM_017000683	NTNG1	3644	3667	1	-21.2	1	0.000817821	0.588	0	0	-6.76235	20	23	10	3UTR		0	0
hsa-miR-938	XM_017000683	NTNG1	3475	3494	1	-20.8	0	0.00228005	0.515	0	0	-11.3949	13	19	5	3UTR		0	1
hsa-miR-939-3p	XM_017000683	NTNG1	3475	3501	1	-27.4	0	0.00146585	0.529	0	0	-8.23906	18	26	7	3UTR		0	0
hsa-miR-941	XM_017000683	NTNG1	2623	2641	1	-28	0	0.0103062	0.515	0	0	-17.0124	17	18	17	3UTR		0	0
hsa-miR-941	XM_017000683	NTNG1	5135	5152	1	-24.3	1	0.00373075	0.529	0	0	-4.957	14	17	11	3UTR		0	0
hsa-miR-942-5p	XM_017000683	NTNG1	3949	3966	1	-22.2	1	0.000217769	0.471	0	0	-3.93757	16	17	16	3UTR		0	0
hsa-miR-942-5p	XM_017000683	NTNG1	2302	2322	1	-20.3	0	0.000366518	0.544	0	0	-12.3713	16	20	6	3UTR		0	0
hsa-miR-943	XM_017000683	NTNG1	5928	5948	1	-20.8	0	0.00119359	0.632	0	0	-14.8568	16	20	8	3UTR		0	0
hsa-miR-1178-5p	XM_017000683	NTNG1	5832	5861	1	-29.5	1	0.000669893	0.456	0	0	-4.17062	17	19	17	3UTR		0	0
hsa-miR-1184	XM_017000683	NTNG1	2472	2493	1	-21.9	1	0.00039495	0.588	0	0	-6.25121	18	21	10	3UTR		0	1
hsa-miR-1225-3p	XM_017000683	NTNG1	5349	5380	1	-28	1	0.00343111	0.397	0	0	-5.03583	17	23	6	3UTR		0	0
hsa-miR-1226-3p	XM_017000683	NTNG1	3489	3512	1	-22	1	0.0300814	0.574	0	0	-5.52986	18	23	11	3UTR		0	0
hsa-miR-1227-5p	XM_017000683	NTNG1	4092	4110	1	-26.6	0	0.0325371	0.559	0	0	-5.71431	14	18	8	3UTR		0	0
hsa-miR-1227-3p	XM_017000683	NTNG1	3475	3500	1	-24.2	0	0.00195753	0.529	0	0	-8.5459	17	25	7	3UTR		0	0
hsa-miR-1227-3p	XM_017000683	NTNG1	3958	3977	1	-21.1	0	3.55e-06	0.529	0	0	-8.51328	15	19	10	3UTR		0	0
hsa-miR-1228-5p	XM_017000683	NTNG1	2517	2539	1	-29.3	1	0.0043431	0.515	0	0	-4.957	19	22	14	3UTR		0	0
hsa-miR-1228-3p	XM_017000683	NTNG1	3665	3708	1	-27.6	0	0.0091854	0.529	0	0	-6.35195	15	19	13	3UTR		0	0
hsa-miR-1229-3p	XM_017000683	NTNG1	3691	3711	1	-23.7	0	0.232624	0.5	0	0	-10.3302	15	20	6	3UTR		0	0
hsa-miR-1231	XM_017000683	NTNG1	5211	5230	1	-22.9	1	0.0939304	0.529	0	0	-6.03692	17	19	12	3UTR		0	1
hsa-miR-1234-3p	XM_017000683	NTNG1	5350	5399	1	-24.9	1	3.18e-08	0.456	0	0	-6.24613	17	30	7	3UTR		0	0
hsa-miR-1200	XM_017000683	NTNG1	5351	5374	1	-23	0	9.02e-05	0.426	0	0	-7.47102	16	23	8	3UTR		0	0
hsa-miR-1204	XM_017000683	NTNG1	3476	3495	1	-21.3	0	0.00114103	0.515	0	0	-11.5151	14	19	6	3UTR		0	0
hsa-miR-1205	XM_017000683	NTNG1	5849	5864	1	-20	1	0.000982227	0.456	0	0	-7.37318	13	15	10	3UTR		0	0
hsa-miR-1205	XM_017000683	NTNG1	5714	5732	1	-20.1	1	0.00154198	0.456	0	0	-4.90607	14	18	11	3UTR		0	0
hsa-miR-1244	XM_017000683	NTNG1	3654	3677	1	-21.5	1	0.000537127	0.544	0	0	-4.52877	22	23	22	3UTR		0	0
hsa-miR-1266-5p	XM_017000683	NTNG1	5098	5153	1	-28.1	0	0.00392923	0.544	0	0	-10.0812	18	22	8	3UTR		0	0
hsa-miR-1266-3p	XM_017000683	NTNG1	3484	3501	1	-21.4	1	0.00146585	0.529	0	0	-12.6408	13	17	9	3UTR		0	0
hsa-miR-1275	XM_017000683	NTNG1	5827	5845	1	-22.1	0	0.000766152	0.471	0	0	-9.04149	14	18	6	3UTR		0	0
hsa-miR-1284	XM_017000683	NTNG1	5464	5480	1	-19	0	0.00906701	0.515	0	0	-16.8091	14	16	9	3UTR		0	0
hsa-miR-1288-3p	XM_017000683	NTNG1	2261	2282	1	-22.3	0	6.44e-06	0.588	0	0	-11.4613	16	21	7	3UTR		0	0
hsa-miR-1255b-2-3p	XM_017000683	NTNG1	5318	5367	1	-21.7	1	7.07e-06	0.471	0	0	-8.3038	15	18	9	3UTR		0	0
hsa-miR-1306-5p	XM_017000683	NTNG1	3686	3705	1	-21.8	1	0.00477556	0.485	0	0	-5.76291	13	19	5	3UTR		0	0
hsa-miR-320d	XM_017000683	NTNG1	5203	5219	1	-19.7	1	0.027572	0.529	0	0	-9.9649	14	16	9	3UTR		0	0
hsa-miR-1910-3p	XM_017000683	NTNG1	3613	3660	1	-23.7	1	0.0038814	0.588	0	0	-4.17062	15	17	15	3UTR		0	0
hsa-miR-1914-3p	XM_017000683	NTNG1	2424	2459	1	-32	0	0.00154687	0.456	0	0	-12.6462	18	24	9	3UTR		0	0
hsa-miR-2114-5p	XM_017000683	NTNG1	3936	3968	1	-22.6	0	1.46e-06	0.456	0	0	-7.48304	15	20	11	3UTR		0	0
hsa-miR-2115-5p	XM_017000683	NTNG1	2262	2282	1	-20.9	0	6.44e-06	0.588	0	0	-10.3555	17	20	9	3UTR		0	0
hsa-miR-2116-3p	XM_017000683	NTNG1	5686	5697	1	-18.7	1	7.83e-05	0.603	0	0	-8.07147	10	11	10	3UTR		0	0
hsa-miR-2117	XM_017000683	NTNG1	5161	5179	1	-19.8	1	0.00034909	0.5	0	0	-7.98267	15	18	10	3UTR		0	0
hsa-miR-548q	XM_017000683	NTNG1	5697	5722	1	-21.8	0	0.00011841	0.485	0	0	-6.82535	19	25	11	3UTR		0	0
hsa-miR-2909	XM_017000683	NTNG1	4828	4843	1	-18	1	0.0101944	0.529	0	0	-4.76182	13	15	7	3UTR		0	0
hsa-miR-3116	XM_017000683	NTNG1	5099	5118	1	-23.9	0	5.09e-05	0.574	0	0	-6.85796	16	19	10	3UTR		0	0
hsa-miR-3120-5p	XM_017000683	NTNG1	3675	3702	1	-23.5	1	0.000695477	0.515	0	0	-10.8405	15	20	7	3UTR		0	1
hsa-miR-3121-5p	XM_017000683	NTNG1	5336	5374	1	-18.9	1	9.02e-05	0.426	0	0	-8.2379	13	17	9	3UTR		0	0
hsa-miR-3122	XM_017000683	NTNG1	5877	5893	1	-18.8	0	0.00680999	0.529	0	0	-10.1922	13	16	11	3UTR		0	0
hsa-miR-3124-5p	XM_017000683	NTNG1	4445	4469	1	-20.4	0	0.000612295	0.529	0	0	-17.2602	17	24	9	3UTR		0	0
hsa-miR-3125	XM_017000683	NTNG1	5203	5222	1	-26.7	1	0.0329476	0.529	0	0	-6.24613	16	19	10	3UTR		0	0
hsa-miR-3126-5p	XM_017000683	NTNG1	4438	4457	1	-21.3	0	0.00289725	0.529	0	0	-13.9804	15	19	10	3UTR		0	0
hsa-miR-3132	XM_017000683	NTNG1	4748	4772	1	-23.6	0	0.000282042	0.559	0	0	-16.134	17	24	9	3UTR		0	0
hsa-miR-3138	XM_017000683	NTNG1	5985	6007	1	-24.6	0	0.109225	0.574	0	0	-9.87071	16	22	9	3UTR		0	0
hsa-miR-3140-3p	XM_017000683	NTNG1	5578	5599	1	-22.9	1	0.000723329	0.588	0	0	-7.28438	19	21	11	3UTR		0	0
hsa-miR-3140-3p	XM_017000683	NTNG1	4628	4646	1	-21.1	0	0.00281961	0.691	0	0	-5.33701	16	18	11	3UTR		0	0
hsa-miR-3141	XM_017000683	NTNG1	2543	2563	1	-23.2	0	0.0451019	0.471	0	0	-7.20265	17	20	9	3UTR		0	0
hsa-miR-3149	XM_017000683	NTNG1	3759	3780	1	-19.7	0	4.44e-06	0.529	0	0	-8.36268	17	21	11	3UTR		0	0
hsa-miR-3155a	XM_017000683	NTNG1	2306	2337	1	-23.4	1	0.00339033	0.5	0	0	-3.93757	18	31	9	3UTR		0	0
hsa-miR-3156-5p	XM_017000683	NTNG1	5241	5257	1	-19.8	0	0.0106841	0.471	0	0	-13.6138	15	16	15	3UTR		0	0
hsa-miR-3158-3p	XM_017000683	NTNG1	5714	5763	1	-29.2	0	0.000297482	0.456	0	0	-7.7949	19	42	9	3UTR		0	0
hsa-miR-3160-5p	XM_017000683	NTNG1	5489	5541	1	-25.2	0	3.23e-05	0.485	0	0	-6.9696	19	26	13	3UTR		0	0
hsa-miR-3160-3p	XM_017000683	NTNG1	5149	5169	1	-19.3	0	0.0542015	0.485	0	0	-9.06122	14	20	11	3UTR		0	0
hsa-miR-3162-3p	XM_017000683	NTNG1	5473	5504	1	-27.7	1	0.101877	0.485	0	0	-7.83842	14	17	10	3UTR		0	0
hsa-miR-3162-3p	XM_017000683	NTNG1	3690	3708	1	-26.7	1	0.0091854	0.529	0	0	-14.554	14	18	8	3UTR		0	0
hsa-miR-3162-3p	XM_017000683	NTNG1	3476	3502	1	-26.2	0	0.00155467	0.544	0	0	-7.43082	18	26	6	3UTR		0	0
hsa-miR-3164	XM_017000683	NTNG1	4925	4940	1	-20	0	0.000907826	0.691	0	0	-7.0584	13	15	11	3UTR		0	0
hsa-miR-3166	XM_017000683	NTNG1	5812	5840	1	-21.6	1	0.000139708	0.5	0	0	-9.14131	17	28	10	3UTR		0	0
hsa-miR-3170	XM_017000683	NTNG1	2246	2268	1	-20.9	1	1.3e-05	0.559	0	0	-7.20497	18	22	8	3UTR		0	0
hsa-miR-3173-5p	XM_017000683	NTNG1	3664	3707	1	-27.9	1	0.00525994	0.515	0	0	-4.957	18	20	18	3UTR		0	0
hsa-miR-1193	XM_017000683	NTNG1	5982	5998	1	-21.2	1	0.344509	0.618	0	0	-9.59293	14	16	9	3UTR		0	0
hsa-miR-3184-5p	XM_017000683	NTNG1	5736	5763	1	-22.7	1	0.000297482	0.456	0	0	-4.65016	19	27	7	3UTR		0	0
hsa-miR-3186-5p	XM_017000683	NTNG1	5523	5541	1	-21.8	0	3.23e-05	0.485	0	0	-7.7148	15	18	9	3UTR		0	0
hsa-miR-3186-5p	XM_017000683	NTNG1	2205	2239	1	-21.4	0	0.00476706	0.559	0	0	-9.07604	19	34	9	3UTR		0	0
hsa-miR-3187-5p	XM_017000683	NTNG1	2070	2105	1	-28.3	0	7.37e-06	0.397	0	0	-6.9696	21	35	9	3UTR		0	0
hsa-miR-3189-5p	XM_017000683	NTNG1	3686	3707	1	-28.6	1	0.00525994	0.515	0	0	-6.24613	16	21	10	3UTR		0	0
hsa-miR-3189-3p	XM_017000683	NTNG1	5131	5153	1	-25	1	0.00392923	0.544	0	0	-4.99396	18	22	11	3UTR		0	0
hsa-miR-3190-3p	XM_017000683	NTNG1	5830	5846	1	-22.2	0	0.000901679	0.456	0	0	-8.53035	15	16	15	3UTR		0	0
hsa-miR-3194-3p	XM_017000683	NTNG1	2305	2323	1	-24.2	1	0.000409681	0.529	0	0	-11.0779	16	18	9	3UTR		0	1
hsa-miR-3197	XM_017000683	NTNG1	2087	2100	1	-26.1	0	3.07e-05	0.397	0	0	-6.74759	12	13	12	3UTR		0	0
hsa-miR-3198	XM_017000683	NTNG1	2423	2441	1	-22.7	1	0.000226706	0.441	0	0	-4.90607	14	18	8	3UTR		0	1
hsa-miR-3199	XM_017000683	NTNG1	4389	4403	1	-20.7	0	0.00829252	0.632	0	0	-9.43454	12	14	10	3UTR		0	0
hsa-miR-3200-5p	XM_017000683	NTNG1	4446	4466	1	-19.3	0	0.000848085	0.544	0	0	-12.3737	15	20	10	3UTR		0	0
hsa-miR-4297	XM_017000683	NTNG1	3683	3700	1	-19.7	1	0.000809196	0.529	0	0	-8.2379	13	17	9	3UTR		0	0
hsa-miR-378c	XM_017000683	NTNG1	5194	5215	1	-23.3	0	0.00478103	0.515	0	0	-8.70704	18	21	13	3UTR		0	0
hsa-miR-378c	XM_017000683	NTNG1	5834	5852	1	-21.8	1	0.000743983	0.426	0	0	-4.65016	16	18	9	3UTR		0	0
hsa-miR-4299	XM_017000683	NTNG1	2819	2840	1	-20.7	1	0.00385029	0.706	0	0	-4.67302	17	21	13	3UTR		0	0
hsa-miR-4298	XM_017000683	NTNG1	2513	2540	1	-25.1	0	0.00519036	0.515	0	0	-8.55977	17	27	5	3UTR		0	0
hsa-miR-4312	XM_017000683	NTNG1	3476	3501	1	-23.6	1	0.00146585	0.529	0	0	-4.957	17	25	10	3UTR		0	0
hsa-miR-4315	XM_017000683	NTNG1	5814	5835	1	-21.4	1	0.000310657	0.485	0	0	-7.14013	16	21	8	3UTR		0	0
hsa-miR-4258	XM_017000683	NTNG1	3693	3707	1	-22.1	1	0.00525994	0.515	0	0	-8.78315	12	14	7	3UTR		0	0
hsa-miR-4259	XM_017000683	NTNG1	5126	5169	1	-22.5	1	0.0542015	0.485	0	0	-6.01339	19	43	10	3UTR		0	0
hsa-miR-4325	XM_017000683	NTNG1	3693	3707	1	-17.4	0	0.00525994	0.515	0	0	-7.32045	12	14	10	3UTR		0	0
hsa-miR-4325	XM_017000683	NTNG1	2165	2181	1	-16.6	0	0.0155726	0.544	0	0	-6.62614	14	16	10	3UTR		0	0
hsa-miR-4326	XM_017000683	NTNG1	3691	3711	1	-22.9	1	0.232624	0.5	0	0	-5.10125	15	20	9	3UTR		0	0
hsa-miR-4326	XM_017000683	NTNG1	5928	5951	1	-21.2	1	0.0014934	0.603	0	0	-4.957	16	23	8	3UTR		0	0
hsa-miR-2355-3p	XM_017000683	NTNG1	2354	2372	1	-19.6	0	0.0969843	0.559	0	0	-6.57952	15	18	8	3UTR		0	0
hsa-miR-2355-3p	XM_017000683	NTNG1	3675	3697	1	-19.5	0	0.00023772	0.529	0	0	-6.82535	14	17	12	3UTR		0	0
hsa-miR-4268	XM_017000683	NTNG1	5330	5368	1	-25.5	0	7.51e-06	0.471	0	0	-7.91236	18	38	10	3UTR		0	0
hsa-miR-4271	XM_017000683	NTNG1	5873	5894	1	-21.1	0	0.00450462	0.529	0	0	-12.3311	16	21	9	3UTR		0	0
hsa-miR-4274	XM_017000683	NTNG1	3956	3984	1	-22.6	0	7.57e-05	0.544	0	0	-8.51328	15	22	9	3UTR		0	0
hsa-miR-4281	XM_017000683	NTNG1	5869	5894	1	-26.5	0	0.00450462	0.529	0	0	-5.48126	17	25	8	3UTR		0	0
hsa-miR-4286	XM_017000683	NTNG1	4845	4858	1	-19.6	0	0.00347115	0.574	0	0	-8.59573	11	13	6	3UTR		0	0
hsa-miR-4287	XM_017000683	NTNG1	4833	4860	1	-19.1	0	0.0119807	0.574	0	0	-8.86514	13	27	7	3UTR		0	0
hsa-miR-4289	XM_017000683	NTNG1	5822	5871	1	-22.9	1	0.0230218	0.441	0	0	-3.93757	16	20	10	3UTR		0	0
hsa-miR-4290	XM_017000683	NTNG1	3957	3973	1	-26.8	0	1.82e-07	0.5	0	0	-6.51454	15	16	15	3UTR		0	0
hsa-miR-4290	XM_017000683	NTNG1	3689	3708	1	-22.5	0	0.0091854	0.529	0	0	-8.24472	15	19	8	3UTR		0	0
hsa-miR-4330	XM_017000683	NTNG1	5082	5118	1	-22.2	1	5.09e-05	0.574	0	0	-7.73085	15	21	10	3UTR		0	0
hsa-miR-500b-5p	XM_017000683	NTNG1	3473	3502	1	-19.5	1	0.00155467	0.544	0	0	-7.78178	13	20	8	3UTR		0	0
hsa-miR-3605-3p	XM_017000683	NTNG1	5680	5697	1	-21.2	1	7.83e-05	0.603	0	0	-5.08246	15	17	11	3UTR		0	0
hsa-miR-3605-3p	XM_017000683	NTNG1	5489	5510	1	-20.8	0	0.111023	0.441	0	0	-8.74337	16	21	6	3UTR		0	0
hsa-miR-3609	XM_017000683	NTNG1	2206	2222	1	-16.8	0	0.132888	0.544	0	0	-10.5151	15	16	15	3UTR		0	0
hsa-miR-3614-5p	XM_017000683	NTNG1	5737	5783	1	-21.7	1	0.000185172	0.529	0	0	-3.93757	21	31	8	3UTR		0	0
hsa-miR-3614-3p	XM_017000683	NTNG1	5103	5122	1	-19.9	1	0.000577464	0.544	0	0	-5.52986	16	19	13	3UTR		0	0
hsa-miR-3616-3p	XM_017000683	NTNG1	5744	5764	1	-25.5	1	0.000190288	0.471	0	0	-5.02746	19	20	19	3UTR		0	0
hsa-miR-3621	XM_017000683	NTNG1	5289	5308	1	-24.9	0	1.91e-09	0.471	0	0	-11.9906	14	19	10	3UTR		0	0
hsa-miR-3622a-5p	XM_017000683	NTNG1	2521	2542	1	-24.9	0	0.012776	0.485	0	0	-9.6489	18	21	12	3UTR		0	0
hsa-miR-3622a-3p	XM_017000683	NTNG1	3663	3705	1	-29.6	1	0.00477556	0.485	0	0	-6.98666	19	23	13	3UTR		0	1
hsa-miR-3655	XM_017000683	NTNG1	2680	2705	1	-27.9	0	0.00116317	0.485	0	0	-5.83853	20	25	10	3UTR		0	0
hsa-miR-3659	XM_017000683	NTNG1	2207	2238	1	-23.6	1	0.00665731	0.559	0	0	-4.02637	16	19	14	3UTR		0	0
hsa-miR-3661	XM_017000683	NTNG1	3176	3201	1	-22.9	0	0.00161676	0.559	0	0	-7.48304	17	25	6	3UTR		0	0
hsa-miR-3667-5p	XM_017000683	NTNG1	5877	5901	1	-23.9	1	1.37e-05	0.544	0	0	-8.3038	19	24	10	3UTR		0	0
hsa-miR-3675-3p	XM_017000683	NTNG1	5173	5192	1	-21.2	1	0.00139661	0.515	0	0	-8.63862	15	19	8	3UTR		0	0
hsa-miR-3679-5p	XM_017000683	NTNG1	3929	3950	1	-21.7	0	0.0281224	0.471	0	0	-8.61914	17	21	6	3UTR		0	0
hsa-miR-3679-3p	XM_017000683	NTNG1	3690	3710	1	-22.3	1	0.233968	0.515	0	0	-7.32605	16	20	7	3UTR		0	0
hsa-miR-3679-3p	XM_017000683	NTNG1	5921	5936	1	-19.6	0	0.0261398	0.588	0	0	-10.8357	12	15	8	3UTR		0	0
hsa-miR-3685	XM_017000683	NTNG1	3691	3710	1	-19	0	0.233968	0.515	0	0	-11.0902	11	14	9	3UTR		0	0
hsa-miR-3687	XM_017000683	NTNG1	2079	2104	1	-25.2	1	1.18e-05	0.397	0	0	-8.57351	19	25	10	3UTR		0	0
hsa-miR-3688-5p	XM_017000683	NTNG1	2333	2349	1	-19	0	0.000316281	0.515	0	0	-10.6827	14	16	12	3UTR		0	0
hsa-miR-3692-3p	XM_017000683	NTNG1	5374	5427	1	-24.4	1	0.00153832	0.456	0	0	-4.99396	18	23	8	3UTR		0	0
hsa-miR-3911	XM_017000683	NTNG1	2065	2084	1	-25.4	1	0.000126593	0.324	0	0	-8.40586	17	19	13	3UTR		0	0
hsa-miR-3918	XM_017000683	NTNG1	5813	5862	1	-25.9	1	0.00067854	0.441	0	0	-6.76235	17	25	8	3UTR		0	0
hsa-miR-3922-3p	XM_017000683	NTNG1	5464	5481	1	-17.9	0	0.00945083	0.529	0	0	-13.8127	16	17	16	3UTR		0	0
hsa-miR-3925-3p	XM_017000683	NTNG1	4841	4858	1	-19.5	1	0.00347115	0.574	0	0	-7.28438	16	17	16	3UTR		0	0
hsa-miR-3926	XM_017000683	NTNG1	3649	3671	1	-21.6	0	0.000104067	0.574	0	0	-10.2417	18	22	9	3UTR		0	0
hsa-miR-3928-5p	XM_017000683	NTNG1	3696	3728	1	-25.2	1	0.00086561	0.5	0	0	-7.3076	21	32	9	3UTR		0	0
hsa-miR-3928-5p	XM_017000683	NTNG1	5231	5247	1	-23.1	1	0.000149482	0.471	0	0	-5.03583	15	16	15	3UTR		0	0
hsa-miR-3929	XM_017000683	NTNG1	2513	2529	1	-20.3	1	2.51e-05	0.5	0	0	-5.08246	15	16	15	3UTR		0	0
hsa-miR-3936	XM_017000683	NTNG1	4089	4108	1	-23.6	0	0.0161645	0.559	0	0	-13.9286	15	19	9	3UTR		0	0
hsa-miR-3944-5p	XM_017000683	NTNG1	2083	2101	1	-19.7	0	1.3e-05	0.382	0	0	-8.63109	14	18	11	3UTR		0	0
hsa-miR-550b-3p	XM_017000683	NTNG1	5727	5771	1	-21.7	0	0.000870753	0.485	0	0	-6.9696	16	26	9	3UTR		0	0
hsa-miR-1268b	XM_017000683	NTNG1	2068	2096	1	-27.7	0	1.32e-05	0.382	0	0	-5.83853	19	28	8	3UTR		0	0
hsa-miR-378e	XM_017000683	NTNG1	5197	5215	1	-20.6	0	0.00478103	0.515	0	0	-8.70704	15	18	10	3UTR		0	0
hsa-miR-378f	XM_017000683	NTNG1	5834	5852	1	-21.8	1	0.000743983	0.426	0	0	-4.65016	16	18	9	3UTR		0	0
hsa-miR-4420	XM_017000683	NTNG1	2310	2332	1	-22	0	0.00741158	0.485	0	0	-7.23797	17	22	10	3UTR		0	0
hsa-miR-4423-5p	XM_017000683	NTNG1	3458	3497	1	-22.5	0	0.00189521	0.529	0	0	-7.91236	20	28	8	3UTR		0	0
hsa-miR-378g	XM_017000683	NTNG1	2409	2446	1	-23.6	1	0.000170653	0.456	0	0	-7.54065	13	15	13	3UTR		0	0
hsa-miR-378g	XM_017000683	NTNG1	5834	5852	1	-21.3	1	0.000743983	0.426	0	0	-4.65016	16	18	9	3UTR		0	0
hsa-miR-378g	XM_017000683	NTNG1	5197	5215	1	-21	0	0.00478103	0.515	0	0	-8.70704	15	18	10	3UTR		0	0
hsa-miR-4428	XM_017000683	NTNG1	2512	2541	1	-19.2	0	0.00639343	0.5	0	0	-7.7148	18	29	10	3UTR		0	0
hsa-miR-4428	XM_017000683	NTNG1	5969	5984	1	-18.3	1	0.133644	0.632	0	0	-6.09222	13	15	7	3UTR		0	0
hsa-miR-4433a-5p	XM_017000683	NTNG1	3686	3707	1	-22.6	1	0.00525994	0.515	0	0	-9.88112	16	21	7	3UTR		0	0
hsa-miR-4433a-3p	XM_017000683	NTNG1	3933	3949	1	-25.7	1	0.0372153	0.471	0	0	-7.78178	14	16	8	3UTR		0	0
hsa-miR-4437	XM_017000683	NTNG1	5747	5768	1	-24.3	1	4.47e-05	0.471	0	0	-5.9255	16	21	7	3UTR		0	0
hsa-miR-4439	XM_017000683	NTNG1	3621	3638	1	-19.4	0	0.0059506	0.662	0	0	-17.1102	14	17	9	3UTR		0	0
hsa-miR-4443	XM_017000683	NTNG1	5579	5594	1	-19.3	1	9.24e-05	0.603	0	0	-5.96246	13	15	8	3UTR		0	0
hsa-miR-4446-5p	XM_017000683	NTNG1	5353	5374	1	-25.7	0	9.02e-05	0.426	0	0	-9.54656	16	21	11	3UTR		0	0
hsa-miR-4447	XM_017000683	NTNG1	2632	2647	1	-23.3	0	0.0400088	0.529	0	0	-6.46361	13	15	11	3UTR		0	1
hsa-miR-4448	XM_017000683	NTNG1	5521	5541	1	-22.8	0	3.23e-05	0.485	0	0	-8.79494	16	20	12	3UTR		0	0
hsa-miR-4454	XM_017000683	NTNG1	5753	5774	1	-26	0	0.0162211	0.485	0	0	-8.18405	16	21	6	3UTR		0	0
hsa-miR-4456	XM_017000683	NTNG1	3111	3129	1	-21.5	1	0.00807739	0.632	0	0	-4.957	15	18	8	3UTR		0	0
hsa-miR-4457	XM_017000683	NTNG1	2637	2674	1	-20.6	0	0.0577428	0.456	0	0	-9.68273	15	19	12	3UTR		0	0
hsa-miR-4459	XM_017000683	NTNG1	2521	2542	1	-28	0	0.012776	0.485	0	0	-5.69428	18	21	12	3UTR		0	0
hsa-miR-378h	XM_017000683	NTNG1	2684	2699	1	-22	1	7.94e-07	0.485	0	0	-4.90607	14	15	14	3UTR		0	0
hsa-miR-4464	XM_017000683	NTNG1	2745	2757	1	-16.7	0	0.0300556	0.706	0	0	-17.1102	11	12	11	3UTR		0	0
hsa-miR-548ai	XM_017000683	NTNG1	2334	2353	1	-22.7	0	5.42e-06	0.544	0	0	-10.3719	16	19	13	3UTR		0	0
hsa-miR-4467	XM_017000683	NTNG1	4086	4106	1	-25.4	0	0.00353243	0.574	0	0	-8.11448	17	20	12	3UTR		0	0
hsa-miR-4467	XM_017000683	NTNG1	4439	4457	1	-24	1	0.00289725	0.529	0	0	-6.19951	17	18	17	3UTR		0	0
hsa-miR-4469	XM_017000683	NTNG1	3475	3497	1	-26.7	1	0.00189521	0.529	0	0	-8.97335	17	22	6	3UTR		0	0
hsa-miR-4469	XM_017000683	NTNG1	5377	5413	1	-25.2	1	0.00052424	0.471	0	0	-3.93757	21	36	10	3UTR		0	0
hsa-miR-3155b	XM_017000683	NTNG1	2307	2337	1	-22	1	0.00339033	0.5	0	0	-3.93757	17	30	9	3UTR		0	0
hsa-miR-3155b	XM_017000683	NTNG1	5396	5410	1	-20.2	1	3.69e-07	0.471	0	0	-12.2551	13	14	13	3UTR		0	0
hsa-miR-4480	XM_017000683	NTNG1	3245	3264	1	-18.6	1	0.00130837	0.706	0	0	-5.9255	12	14	12	3UTR		0	0
hsa-miR-4487	XM_017000683	NTNG1	2513	2533	1	-20.4	0	0.00800329	0.515	0	0	-7.84025	15	20	6	3UTR		0	0
hsa-miR-4489	XM_017000683	NTNG1	5832	5860	1	-22.2	1	0.000495396	0.456	0	0	-5.08246	18	28	9	3UTR		0	0
hsa-miR-548al	XM_017000683	NTNG1	5462	5480	1	-16.4	0	0.00906701	0.515	0	0	-8.81432	14	18	9	3UTR		0	0
hsa-miR-4516	XM_017000683	NTNG1	5207	5224	1	-22.2	1	0.0467868	0.529	0	0	-8.52688	14	17	9	3UTR		0	0
hsa-miR-4521	XM_017000683	NTNG1	5349	5368	1	-24.1	0	7.51e-06	0.471	0	0	-16.1138	16	19	12	3UTR		0	0
hsa-miR-4529-5p	XM_017000683	NTNG1	2399	2426	1	-19.8	1	2.58e-05	0.426	0	0	-3.79332	19	27	6	3UTR		0	0
hsa-miR-4533	XM_017000683	NTNG1	2533	2553	1	-22.6	1	0.12215	0.5	0	0	-9.13263	16	20	11	3UTR		0	0
hsa-miR-4534	XM_017000683	NTNG1	2523	2539	1	-22.3	1	0.0043431	0.515	0	0	-8.00486	14	16	9	3UTR		0	0
hsa-miR-378i	XM_017000683	NTNG1	5178	5215	1	-23.5	0	0.00478103	0.515	0	0	-8.70704	17	22	10	3UTR		0	0
hsa-miR-3975	XM_017000683	NTNG1	3765	3800	1	-18.2	0	0.0146623	0.618	0	0	-8.76019	13	17	11	3UTR		0	0
hsa-miR-3978	XM_017000683	NTNG1	5393	5419	1	-22.7	0	0.00043796	0.471	0	0	-13.3775	18	26	10	3UTR		0	0
hsa-miR-4632-5p	XM_017000683	NTNG1	4097	4120	1	-29.3	1	0.375111	0.544	0	0	-5.69245	19	23	13	3UTR		0	0
hsa-miR-4633-3p	XM_017000683	NTNG1	4081	4103	1	-22.6	0	0.00195317	0.559	0	0	-5.69428	18	22	10	3UTR		0	0
hsa-miR-4640-3p	XM_017000683	NTNG1	3476	3501	1	-25.7	0	0.00146585	0.529	0	0	-9.54656	17	25	7	3UTR		0	0
hsa-miR-4641	XM_017000683	NTNG1	5678	5696	1	-21	1	0.000104624	0.603	0	0	-6.54929	15	18	11	3UTR		0	0
hsa-miR-4646-3p	XM_017000683	NTNG1	3475	3502	1	-26.7	0	0.00155467	0.544	0	0	-9.54656	14	17	9	3UTR		0	0
hsa-miR-4649-3p	XM_017000683	NTNG1	3665	3708	1	-27.2	0	0.0091854	0.529	0	0	-12.9896	15	19	12	3UTR		0	0
hsa-miR-4653-5p	XM_017000683	NTNG1	5148	5192	1	-24.2	1	0.00139661	0.515	0	0	-3.93757	16	19	13	3UTR		0	0
hsa-miR-4658	XM_017000683	NTNG1	2070	2089	1	-22.3	0	0.000177812	0.353	0	0	-15.9878	15	19	13	3UTR		0	0
hsa-miR-4658	XM_017000683	NTNG1	3125	3146	1	-21.8	1	0.000137572	0.574	0	0	-8.57351	16	21	11	3UTR		0	0
hsa-miR-4677-5p	XM_017000683	NTNG1	5529	5552	1	-24.5	1	0.00461492	0.529	0	0	-4.65016	19	23	13	3UTR		0	0
hsa-miR-4682	XM_017000683	NTNG1	5388	5411	1	-25.1	0	2.64e-05	0.485	0	0	-11.7382	20	23	11	3UTR		0	0
hsa-miR-4686	XM_017000683	NTNG1	3482	3500	1	-21	1	0.00195753	0.529	0	0	-10.0807	15	18	9	3UTR		0	0
hsa-miR-4686	XM_017000683	NTNG1	5224	5258	1	-21.1	1	0.0312218	0.485	0	0	-7.28438	22	34	16	3UTR		0	0
hsa-miR-4690-5p	XM_017000683	NTNG1	5394	5417	1	-25.8	0	0.00133838	0.485	0	0	-8.43861	16	23	5	3UTR		0	1
hsa-miR-4690-5p	XM_017000683	NTNG1	5843	5873	1	-25.6	1	0.0312463	0.456	0	0	-6.23647	18	30	10	3UTR		0	1
hsa-miR-4692	XM_017000683	NTNG1	4076	4101	1	-22.3	1	0.00132164	0.544	0	0	-3.79332	16	18	16	3UTR		0	0
hsa-miR-4701-5p	XM_017000683	NTNG1	5493	5543	1	-28.3	0	2.38e-05	0.5	0	0	-6.72377	20	50	10	3UTR		0	0
hsa-miR-4706	XM_017000683	NTNG1	2524	2542	1	-29.4	1	0.012776	0.485	0	0	-4.957	16	18	10	3UTR		0	0
hsa-miR-4707-3p	XM_017000683	NTNG1	3479	3501	1	-24.1	1	0.00146585	0.529	0	0	-12.0971	16	22	6	3UTR		0	0
hsa-miR-4710	XM_017000683	NTNG1	5973	5989	1	-26	1	0.142448	0.618	0	0	-5.18008	15	16	15	3UTR		0	0
hsa-miR-4710	XM_017000683	NTNG1	4092	4108	1	-23.2	0	0.0161645	0.559	0	0	-10.4142	14	16	10	3UTR		0	0
hsa-miR-4712-5p	XM_017000683	NTNG1	5887	5908	1	-18.9	1	3.34e-05	0.5	0	0	-4.90607	14	21	8	3UTR		0	0
hsa-miR-4720-3p	XM_017000683	NTNG1	3221	3240	1	-20.9	0	0.0105425	0.632	0	0	-12.3778	16	19	13	3UTR		0	0
hsa-miR-4721	XM_017000683	NTNG1	5396	5418	1	-28.2	0	0.00153614	0.485	0	0	-9.02511	18	22	9	3UTR		0	0
hsa-miR-4723-3p	XM_017000683	NTNG1	5148	5177	1	-24.5	1	0.0021446	0.5	0	0	-4.79441	18	29	6	3UTR		0	0
hsa-miR-4725-5p	XM_017000683	NTNG1	3478	3501	1	-24.5	0	0.00146585	0.529	0	0	-10.5818	12	16	6	3UTR		0	0
hsa-miR-4728-3p	XM_017000683	NTNG1	5495	5545	1	-29	0	1.45e-05	0.515	0	0	-10.0954	19	50	9	3UTR		0	0
hsa-miR-4732-5p	XM_017000683	NTNG1	3936	3959	1	-21.8	0	0.000694226	0.485	0	0	-12.0571	17	23	9	3UTR		0	0
hsa-miR-4736	XM_017000683	NTNG1	5249	5264	1	-21.6	0	0.109359	0.529	0	0	-7.91236	14	15	14	3UTR		0	0
hsa-miR-3064-5p	XM_017000683	NTNG1	4476	4497	1	-25.8	1	0.00713898	0.632	0	0	-7.28438	19	21	11	3UTR		0	0
hsa-miR-4738-5p	XM_017000683	NTNG1	4221	4243	1	-21	1	0.000548122	0.618	0	0	-6.10696	18	22	12	3UTR		0	0
hsa-miR-4738-5p	XM_017000683	NTNG1	2922	2956	1	-19.6	1	0.00192725	0.603	0	0	-6.67474	15	20	11	3UTR		0	0
hsa-miR-4742-3p	XM_017000683	NTNG1	5519	5549	1	-21.3	1	2.34e-05	0.529	0	0	-5.52986	17	22	8	3UTR		0	0
hsa-miR-4743-5p	XM_017000683	NTNG1	2527	2553	1	-25.9	0	0.12215	0.5	0	0	-11.8241	19	26	12	3UTR		0	0
hsa-miR-4743-3p	XM_017000683	NTNG1	3475	3502	1	-22.8	1	0.00155467	0.544	0	0	-3.93757	21	27	10	3UTR		0	0
hsa-miR-4747-3p	XM_017000683	NTNG1	3966	3999	1	-25.6	0	0.023044	0.574	0	0	-9.86134	16	33	8	3UTR		0	0
hsa-miR-4748	XM_017000683	NTNG1	5861	5883	1	-23.2	0	0.0290707	0.485	0	0	-8.23906	17	22	6	3UTR		0	0
hsa-miR-4749-5p	XM_017000683	NTNG1	2514	2537	1	-27	1	0.00369268	0.515	0	0	-6.10696	18	23	8	3UTR		0	0
hsa-miR-4752	XM_017000683	NTNG1	5326	5347	1	-19.8	0	0.00380809	0.471	0	0	-11.3547	18	21	10	3UTR		0	0
hsa-miR-371b-3p	XM_017000683	NTNG1	5674	5701	1	-22.2	0	1.63e-05	0.574	0	0	-6.82535	20	27	9	3UTR		0	0
hsa-miR-4754	XM_017000683	NTNG1	2573	2594	1	-22.2	0	0.00184476	0.618	0	0	-11.608	17	21	12	3UTR		0	0
hsa-miR-4755-5p	XM_017000683	NTNG1	5281	5309	1	-19.8	0	6.77e-10	0.456	0	0	-11.3719	14	18	9	3UTR		0	0
hsa-miR-4755-3p	XM_017000683	NTNG1	5390	5410	1	-23.3	1	3.69e-07	0.471	0	0	-9.59293	13	15	13	3UTR		0	0
hsa-miR-4756-3p	XM_017000683	NTNG1	4380	4416	1	-22.7	1	0.0184197	0.603	0	0	-3.93757	17	25	9	3UTR		0	0
hsa-miR-4758-3p	XM_017000683	NTNG1	3664	3707	1	-30.7	1	0.00525994	0.515	0	0	-6.78234	15	19	11	3UTR		0	0
hsa-miR-4768-5p	XM_017000683	NTNG1	3474	3496	1	-21.6	1	0.00143694	0.529	0	0	-7.14013	16	22	6	3UTR		0	0
hsa-miR-4768-3p	XM_017000683	NTNG1	5299	5322	1	-20.9	1	6.4e-05	0.471	0	0	-8.57351	15	23	7	3UTR		0	0
hsa-miR-4769-3p	XM_017000683	NTNG1	3689	3708	1	-26.4	0	0.0091854	0.529	0	0	-12.63	17	19	9	3UTR		0	0
hsa-miR-4772-3p	XM_017000683	NTNG1	3484	3500	1	-19.2	0	0.00195753	0.529	0	0	-10.729	13	16	8	3UTR		0	0
hsa-miR-4772-3p	XM_017000683	NTNG1	2473	2493	1	-18.9	1	0.00039495	0.588	0	0	-11.3749	16	20	9	3UTR		0	0
hsa-miR-4776-5p	XM_017000683	NTNG1	4086	4105	1	-23.1	0	0.00275516	0.574	0	0	-12.7823	17	19	13	3UTR		0	0
hsa-miR-4776-3p	XM_017000683	NTNG1	5350	5370	1	-22.7	1	4.91e-06	0.441	0	0	-3.79332	16	20	7	3UTR		0	0
hsa-miR-4436b-5p	XM_017000683	NTNG1	3665	3706	1	-28.3	0	0.00493366	0.5	0	0	-8.3861	17	21	11	3UTR		0	0
hsa-miR-4781-5p	XM_017000683	NTNG1	5086	5108	1	-19.3	1	0.00196167	0.618	0	0	-6.97192	16	22	8	3UTR		0	0
hsa-miR-2467-5p	XM_017000683	NTNG1	4189	4208	1	-22.5	0	0.00010449	0.588	0	0	-14.2298	16	19	8	3UTR		0	0
hsa-miR-4786-5p	XM_017000683	NTNG1	5371	5403	1	-22.3	0	2.5e-08	0.456	0	0	-16.4904	16	32	9	3UTR		0	0
hsa-miR-4788	XM_017000683	NTNG1	5879	5902	1	-21.6	0	1.44e-05	0.544	0	0	-6.51454	18	23	10	3UTR		0	0
hsa-miR-4793-3p	XM_017000683	NTNG1	2655	2702	1	-24	1	0.000100961	0.515	0	0	-7.48864	19	47	9	3UTR		0	0
hsa-miR-5001-3p	XM_017000683	NTNG1	5320	5364	1	-22.7	0	8.16e-07	0.485	0	0	-10.1324	14	18	9	3UTR		0	0
hsa-miR-5003-5p	XM_017000683	NTNG1	2571	2592	1	-18.3	0	0.00273613	0.588	0	0	-10.5818	17	21	11	3UTR		0	0
hsa-miR-5003-3p	XM_017000683	NTNG1	3474	3493	1	-18	1	0.000597383	0.515	0	0	-6.93496	16	19	11	3UTR		0	0
hsa-miR-5004-5p	XM_017000683	NTNG1	2564	2588	1	-21.2	1	0.0131256	0.588	0	0	-4.52877	18	24	9	3UTR		0	1
hsa-miR-5004-3p	XM_017000683	NTNG1	5398	5418	1	-24.6	0	0.00153614	0.485	0	0	-8.55977	18	20	13	3UTR		0	0
hsa-miR-5010-5p	XM_017000683	NTNG1	4094	4108	1	-23.9	0	0.0161645	0.559	0	0	-7.35753	13	14	13	3UTR		0	0
hsa-miR-5088-5p	XM_017000683	NTNG1	2525	2549	1	-28	0	0.126749	0.485	0	0	-6.55112	19	24	11	3UTR		0	0
hsa-miR-5088-3p	XM_017000683	NTNG1	5492	5510	1	-24.9	0	0.111023	0.441	0	0	-8.10683	16	18	10	3UTR		0	0
hsa-miR-5088-3p	XM_017000683	NTNG1	5148	5179	1	-25.3	1	0.00034909	0.5	0	0	-5.18008	19	31	9	3UTR		0	0
hsa-miR-5187-5p	XM_017000683	NTNG1	2516	2548	1	-27.1	0	0.131671	0.471	0	0	-6.19385	18	23	7	3UTR		0	0
hsa-miR-5193	XM_017000683	NTNG1	3955	3974	1	-21.9	0	4.79e-07	0.515	0	0	-8.4925	16	19	10	3UTR		0	0
hsa-miR-5194	XM_017000683	NTNG1	5193	5212	1	-23.2	1	0.00453513	0.485	0	0	-6.10696	16	19	10	3UTR		0	0
hsa-miR-5195-3p	XM_017000683	NTNG1	5293	5323	1	-28.7	1	0.000103926	0.471	0	0	-7.14013	19	30	9	3UTR		1	0
hsa-miR-5196-3p	XM_017000683	NTNG1	3691	3711	1	-25.3	0	0.232624	0.5	0	0	-6.78424	17	20	9	3UTR		0	0
hsa-miR-5197-3p	XM_017000683	NTNG1	4133	4156	1	-15.8	1	0.00917716	0.721	0	0	-6.90779	11	13	11	3UTR		0	0
hsa-miR-5579-3p	XM_017000683	NTNG1	3937	3955	1	-17.1	0	0.0116362	0.456	0	0	-8.35072	15	18	12	3UTR		0	0
hsa-miR-664b-3p	XM_017000683	NTNG1	3686	3706	1	-24.6	1	0.00493366	0.5	0	0	-4.67302	16	20	14	3UTR		0	1
hsa-miR-5581-3p	XM_017000683	NTNG1	3685	3707	1	-19.1	1	0.00525994	0.515	0	0	-5.76291	13	17	8	3UTR		0	0
hsa-miR-5584-3p	XM_017000683	NTNG1	3689	3713	1	-23.1	1	0.000186213	0.485	0	0	-4.957	15	19	10	3UTR		0	0
hsa-miR-5587-3p	XM_017000683	NTNG1	5738	5759	1	-24.2	1	0.000271442	0.471	0	0	-8.57351	16	21	7	3UTR		0	0
hsa-miR-5589-3p	XM_017000683	NTNG1	6060	6079	1	-21.1	0	0.00941663	0.647	0	0	-13.6656	16	19	11	3UTR		0	0
hsa-miR-5591-3p	XM_017000683	NTNG1	5358	5376	1	-20.8	0	0.00118494	0.412	0	0	-10.853	14	18	9	3UTR		0	0
hsa-miR-5680	XM_017000683	NTNG1	5209	5222	1	-17	0	0.0329476	0.529	0	0	-7.3066	12	13	12	3UTR		0	0
hsa-miR-5692a	XM_017000683	NTNG1	2706	2732	1	-18.6	0	0.00278571	0.574	0	0	-15.5666	16	26	9	3UTR		0	0
hsa-miR-5694	XM_017000683	NTNG1	4393	4415	1	-20.1	0	0.00147607	0.603	0	0	-11.4034	16	22	12	3UTR		0	0
hsa-miR-5705	XM_017000683	NTNG1	5392	5412	1	-26.2	1	0.000348572	0.485	0	0	-6.93496	17	20	7	3UTR		0	0
hsa-miR-5706	XM_017000683	NTNG1	5048	5067	1	-19.3	1	0.00288494	0.676	0	0	-12.6408	17	19	15	3UTR		0	0
hsa-miR-5708	XM_017000683	NTNG1	4854	4883	1	-22.3	1	0.000101659	0.603	0	0	-3.93757	17	21	10	3UTR		0	0
hsa-miR-5739	XM_017000683	NTNG1	5182	5210	1	-23.2	1	0.00350192	0.485	0	0	-4.957	18	28	8	3UTR		0	0
hsa-miR-6075	XM_017000683	NTNG1	4086	4103	1	-24.9	0	0.00195317	0.559	0	0	-8.40165	15	17	12	3UTR		0	0
hsa-miR-6080	XM_017000683	NTNG1	4080	4097	1	-21.6	1	0.000270595	0.544	0	0	-5.19005	15	17	13	3UTR		0	0
hsa-miR-6087	XM_017000683	NTNG1	4095	4114	1	-24.2	1	0.0999683	0.559	0	0	-5.19005	15	19	5	3UTR		0	0
hsa-miR-6088	XM_017000683	NTNG1	5867	5888	1	-22.3	0	0.0366176	0.5	0	0	-8.51906	17	21	9	3UTR		0	0
hsa-miR-6128	XM_017000683	NTNG1	3907	3921	1	-14.9	1	0.00830763	0.544	0	0	-8.25288	13	14	13	3UTR		0	0
hsa-miR-378j	XM_017000683	NTNG1	5834	5852	1	-19.5	1	0.000743983	0.426	0	0	-4.65016	16	18	9	3UTR		0	0
hsa-miR-6130	XM_017000683	NTNG1	5957	5986	1	-17.4	1	0.163217	0.632	0	0	-7.05204	12	15	8	3UTR		0	0
hsa-miR-6499-3p	XM_017000683	NTNG1	2093	2132	1	-24	1	0.0193243	0.544	0	0	-4.17062	20	34	16	3UTR		0	0
hsa-miR-6500-5p	XM_017000683	NTNG1	5388	5420	1	-26.6	0	1.5e-05	0.471	0	0	-7.7949	20	27	10	3UTR		0	0
hsa-miR-6501-5p	XM_017000683	NTNG1	4388	4419	1	-34.5	1	0.0100509	0.559	0	0	-4.957	20	31	14	3UTR		0	0
hsa-miR-6505-3p	XM_017000683	NTNG1	5489	5505	1	-17.4	0	0.101852	0.471	0	0	-9.54656	13	16	10	3UTR		0	0
hsa-miR-6507-3p	XM_017000683	NTNG1	5473	5509	1	-21.9	0	0.110169	0.441	0	0	-13.6656	17	22	13	3UTR		0	0
hsa-miR-6508-3p	XM_017000683	NTNG1	3409	3428	1	-17.9	0	0.000309711	0.618	0	0	-10.3702	17	19	13	3UTR		0	0
hsa-miR-6509-5p	XM_017000683	NTNG1	3912	3949	1	-23	0	0.0372153	0.471	0	0	-8.05823	14	16	14	3UTR		0	0
hsa-miR-6510-5p	XM_017000683	NTNG1	3917	3941	1	-22.1	1	0.00186717	0.471	0	0	-6.46952	17	24	8	3UTR		0	0
hsa-miR-6511a-3p	XM_017000683	NTNG1	3684	3707	1	-22.6	1	0.00525994	0.515	0	0	-7.3076	17	23	7	3UTR		0	0
hsa-miR-6511a-3p	XM_017000683	NTNG1	3956	3973	1	-21.9	0	1.82e-07	0.5	0	0	-11.6597	16	17	16	3UTR		0	0
hsa-miR-6512-5p	XM_017000683	NTNG1	4144	4160	1	-16.9	0	0.00532871	0.735	0	0	-6.51454	14	16	11	3UTR		0	0
hsa-miR-6513-5p	XM_017000683	NTNG1	5679	5701	1	-25.7	0	1.63e-05	0.574	0	0	-13.9286	17	22	11	3UTR		0	0
hsa-miR-6515-5p	XM_017000683	NTNG1	5976	5993	1	-19.5	1	0.358029	0.618	0	0	-7.47494	14	17	9	3UTR		0	0
hsa-miR-6515-3p	XM_017000683	NTNG1	3690	3711	1	-23.7	1	0.232624	0.5	0	0	-7.28438	17	21	9	3UTR		0	0
hsa-miR-6515-3p	XM_017000683	NTNG1	5492	5511	1	-21	0	0.10669	0.441	0	0	-7.7949	16	19	8	3UTR		0	0
hsa-miR-6515-3p	XM_017000683	NTNG1	5928	5950	1	-19.7	1	0.00157884	0.618	0	0	-13.6602	14	22	7	3UTR		0	0
hsa-miR-6715b-5p	XM_017000683	NTNG1	2650	2674	1	-25.1	0	0.0577428	0.456	0	0	-9.69585	17	24	10	3UTR		0	0
hsa-miR-6716-5p	XM_017000683	NTNG1	2523	2540	1	-23.3	0	0.00519036	0.515	0	0	-9.50465	16	17	16	3UTR		0	0
hsa-miR-6717-5p	XM_017000683	NTNG1	4097	4120	1	-23.7	1	0.375111	0.544	0	0	-5.52986	17	23	9	3UTR		0	0
hsa-miR-892c-3p	XM_017000683	NTNG1	3461	3499	1	-23.2	1	0.00108061	0.529	0	0	-4.957	16	18	16	3UTR		0	0
hsa-miR-6726-3p	XM_017000683	NTNG1	3665	3706	1	-26.1	0	0.00493366	0.5	0	0	-8.05661	17	22	14	3UTR		0	0
hsa-miR-6728-5p	XM_017000683	NTNG1	4085	4109	1	-24.4	0	0.0241104	0.559	0	0	-6.42973	18	24	7	3UTR		0	0
hsa-miR-6728-3p	XM_017000683	NTNG1	3674	3708	1	-29	1	0.0091854	0.529	0	0	-7.54034	17	19	17	3UTR		0	0
hsa-miR-6733-3p	XM_017000683	NTNG1	4463	4479	1	-20.3	1	0.000460934	0.529	0	0	-8.42926	15	16	15	3UTR		0	0
hsa-miR-6734-3p	XM_017000683	NTNG1	5488	5508	1	-23.3	1	0.0987319	0.456	0	0	-8.40586	17	20	7	3UTR		0	0
hsa-miR-6736-5p	XM_017000683	NTNG1	5747	5770	1	-25.5	0	4.89e-05	0.471	0	0	-8.05661	18	23	10	3UTR		0	0
hsa-miR-6737-3p	XM_017000683	NTNG1	4847	4868	1	-23.3	0	2.19e-05	0.544	0	0	-7.61527	15	21	8	3UTR		0	0
hsa-miR-6738-5p	XM_017000683	NTNG1	4085	4111	1	-24.7	0	0.0435547	0.559	0	0	-9.37628	19	26	8	3UTR		0	0
hsa-miR-6738-3p	XM_017000683	NTNG1	5358	5412	1	-23.3	0	0.000348572	0.485	0	0	-8.05661	21	54	8	3UTR		0	0
hsa-miR-6738-3p	XM_017000683	NTNG1	3691	3710	1	-22.5	1	0.233968	0.515	0	0	-10.3988	16	19	11	3UTR		0	0
hsa-miR-6739-3p	XM_017000683	NTNG1	5531	5552	1	-23.3	1	0.00461492	0.529	0	0	-7.10297	17	21	8	3UTR		0	0
hsa-miR-6740-5p	XM_017000683	NTNG1	2525	2545	1	-20.4	1	0.015947	0.5	0	0	-4.76182	16	20	9	3UTR		0	0
hsa-miR-6740-3p	XM_017000683	NTNG1	3950	3974	1	-23	1	4.79e-07	0.515	0	0	-4.957	14	17	10	3UTR		0	0
hsa-miR-6740-3p	XM_017000683	NTNG1	3691	3711	1	-21.3	1	0.232624	0.5	0	0	-4.957	14	20	8	3UTR		0	0
hsa-miR-6741-3p	XM_017000683	NTNG1	3957	3979	1	-22.7	1	1.3e-06	0.529	0	0	-5.9255	16	22	9	3UTR		0	0
hsa-miR-6742-5p	XM_017000683	NTNG1	4076	4110	1	-27.6	1	0.0325371	0.559	0	0	-8.76407	14	19	9	3UTR		0	0
hsa-miR-6745	XM_017000683	NTNG1	2523	2540	1	-21.9	1	0.00519036	0.515	0	0	-6.6181	14	17	6	3UTR		0	0
hsa-miR-6746-3p	XM_017000683	NTNG1	3674	3707	1	-27.9	0	0.00525994	0.515	0	0	-8.4155	14	16	14	3UTR		0	0
hsa-miR-6747-3p	XM_017000683	NTNG1	3674	3702	1	-26.2	1	0.000695477	0.515	0	0	-5.08246	14	17	11	3UTR		0	0
hsa-miR-6750-3p	XM_017000683	NTNG1	3490	3510	1	-25.4	0	0.0396409	0.574	0	0	-8.32703	15	20	10	3UTR		0	0
hsa-miR-6752-3p	XM_017000683	NTNG1	5488	5504	1	-24.3	1	0.101877	0.485	0	0	-7.83842	14	16	8	3UTR		0	0
hsa-miR-6753-3p	XM_017000683	NTNG1	5497	5516	1	-24.4	1	0.166333	0.471	0	0	-7.10297	15	19	10	3UTR		0	0
hsa-miR-6754-3p	XM_017000683	NTNG1	3653	3708	1	-35	1	0.0091854	0.529	0	0	-4.17062	19	23	15	3UTR		0	0
hsa-miR-6755-3p	XM_017000683	NTNG1	5145	5170	1	-19.7	0	0.0581891	0.5	0	0	-10.7522	18	25	13	3UTR		0	0
hsa-miR-6756-3p	XM_017000683	NTNG1	5349	5374	1	-26.5	1	9.02e-05	0.426	0	0	-4.957	18	25	7	3UTR		0	0
hsa-miR-6757-3p	XM_017000683	NTNG1	3690	3706	1	-22.8	0	0.00493366	0.5	0	0	-14.1481	14	16	12	3UTR		0	0
hsa-miR-6761-3p	XM_017000683	NTNG1	3689	3707	1	-22.2	0	0.00525994	0.515	0	0	-8.82806	17	18	17	3UTR		0	0
hsa-miR-6761-3p	XM_017000683	NTNG1	5489	5509	1	-20.6	0	0.110169	0.441	0	0	-12.9471	18	20	14	3UTR		0	0
hsa-miR-6767-5p	XM_017000683	NTNG1	5095	5111	1	-20.3	0	0.00353202	0.603	0	0	-8.36268	15	16	15	3UTR		0	0
hsa-miR-6769a-3p	XM_017000683	NTNG1	3475	3497	1	-23.3	1	0.00189521	0.529	0	0	-6.87023	17	22	7	3UTR		0	0
hsa-miR-6769a-3p	XM_017000683	NTNG1	3690	3707	1	-23.6	0	0.00525994	0.515	0	0	-10.0707	14	17	6	3UTR		0	0
hsa-miR-6771-5p	XM_017000683	NTNG1	5851	5876	1	-27.2	0	0.0524616	0.441	0	0	-8.05823	16	25	9	3UTR		0	0
hsa-miR-6772-5p	XM_017000683	NTNG1	2065	2087	1	-27.9	0	6.89e-05	0.338	0	0	-7.41489	18	22	13	3UTR		0	0
hsa-miR-6772-5p	XM_017000683	NTNG1	5203	5225	1	-27.4	0	0.0313023	0.515	0	0	-9.6003	17	22	9	3UTR		0	0
hsa-miR-6773-3p	XM_017000683	NTNG1	5496	5514	1	-21.9	0	0.132762	0.456	0	0	-8.68381	15	18	10	3UTR		0	0
hsa-miR-6774-5p	XM_017000683	NTNG1	5731	5755	1	-27.1	1	6.18e-06	0.471	0	0	-9.2861	20	24	10	3UTR		0	0
hsa-miR-6775-3p	XM_017000683	NTNG1	3475	3501	1	-25.6	0	0.00146585	0.529	0	0	-6.51454	18	26	6	3UTR		0	0
hsa-miR-6776-3p	XM_017000683	NTNG1	3665	3707	1	-24.2	0	0.00525994	0.515	0	0	-8.4155	15	18	10	3UTR		0	0
hsa-miR-6777-5p	XM_017000683	NTNG1	3928	3951	1	-27.7	1	0.0184708	0.456	0	0	-7.86061	20	23	14	3UTR		0	0
hsa-miR-6777-3p	XM_017000683	NTNG1	5351	5367	1	-25.8	1	7.07e-06	0.471	0	0	-6.10696	14	16	10	3UTR		0	1
hsa-miR-6779-5p	XM_017000683	NTNG1	5209	5226	1	-25.1	1	0.0408152	0.515	0	0	-4.17062	15	17	8	3UTR		0	0
hsa-miR-6782-3p	XM_017000683	NTNG1	3696	3723	1	-24.8	0	0.000334453	0.5	0	0	-6.51454	18	27	11	3UTR		0	0
hsa-miR-6783-3p	XM_017000683	NTNG1	3683	3709	1	-22.9	0	0.234407	0.515	0	0	-7.38222	18	26	9	3UTR		0	0
hsa-miR-6784-5p	XM_017000683	NTNG1	5872	5890	1	-22.8	1	0.0136821	0.515	0	0	-11.2306	15	18	9	3UTR		0	0
hsa-miR-6784-3p	XM_017000683	NTNG1	3692	3711	1	-23	0	0.232624	0.5	0	0	-13.6203	16	19	11	3UTR		0	0
hsa-miR-6785-3p	XM_017000683	NTNG1	3950	3978	1	-24.4	0	4.05e-06	0.515	0	0	-8.66331	16	21	11	3UTR		0	0
hsa-miR-6788-5p	XM_017000683	NTNG1	5194	5226	1	-23.3	1	0.0408152	0.515	0	0	-10.3422	17	23	10	3UTR		0	0
hsa-miR-6788-3p	XM_017000683	NTNG1	3666	3709	1	-28.9	0	0.234407	0.515	0	0	-9.79437	18	24	6	3UTR		0	0
hsa-miR-6792-3p	XM_017000683	NTNG1	5473	5510	1	-23.1	1	0.111023	0.441	0	0	-8.55011	15	21	6	3UTR		0	0
hsa-miR-6795-5p	XM_017000683	NTNG1	2524	2553	1	-24.5	1	0.12215	0.5	0	0	-4.17062	22	29	10	3UTR		0	0
hsa-miR-6795-3p	XM_017000683	NTNG1	5473	5501	1	-23.8	1	0.107477	0.5	0	0	-3.93757	17	28	14	3UTR		0	0
hsa-miR-6798-3p	XM_017000683	NTNG1	5483	5503	1	-25.4	1	0.102742	0.485	0	0	-7.21971	16	20	7	3UTR		0	0
hsa-miR-6798-3p	XM_017000683	NTNG1	3955	3972	1	-24.4	0	1.06e-07	0.485	0	0	-14.1983	14	17	8	3UTR		0	0
hsa-miR-6799-5p	XM_017000683	NTNG1	5851	5876	1	-29.5	0	0.0524616	0.441	0	0	-8.85129	17	25	11	3UTR		0	0
hsa-miR-6799-3p	XM_017000683	NTNG1	3476	3501	1	-24.4	1	0.00146585	0.529	0	0	-6.87023	16	25	10	3UTR		0	0
hsa-miR-6802-5p	XM_017000683	NTNG1	5391	5410	1	-22.8	0	3.69e-07	0.471	0	0	-7.7949	15	19	9	3UTR		0	0
hsa-miR-6802-3p	XM_017000683	NTNG1	5487	5505	1	-19.7	1	0.101852	0.471	0	0	-5.22671	15	18	7	3UTR		0	0
hsa-miR-6804-3p	XM_017000683	NTNG1	3691	3706	1	-27.7	1	0.00493366	0.5	0	0	-6.06975	13	15	12	3UTR		0	1
hsa-miR-6804-3p	XM_017000683	NTNG1	5488	5504	1	-26.1	0	0.101877	0.485	0	0	-9.54656	14	16	11	3UTR		0	1
hsa-miR-6805-5p	XM_017000683	NTNG1	5273	5302	1	-26.9	1	1.31e-05	0.441	0	0	-4.52877	20	29	13	3UTR		0	1
hsa-miR-6809-3p	XM_017000683	NTNG1	3690	3710	1	-24.1	1	0.233968	0.515	0	0	-7.49372	17	20	7	3UTR		0	0
hsa-miR-6810-5p	XM_017000683	NTNG1	4086	4109	1	-25.4	0	0.0241104	0.559	0	0	-10.8298	18	23	10	3UTR		0	0
hsa-miR-6810-5p	XM_017000683	NTNG1	5847	5876	1	-24.5	1	0.0524616	0.441	0	0	-6.24613	18	29	13	3UTR		0	0
hsa-miR-6810-3p	XM_017000683	NTNG1	3475	3501	1	-41.2	1	0.00146585	0.529	0	0	-4.957	21	26	12	3UTR		0	0
hsa-miR-6812-3p	XM_017000683	NTNG1	3475	3500	1	-27.1	1	0.00195753	0.529	0	0	-6.97192	18	25	6	3UTR		0	0
hsa-miR-6812-3p	XM_017000683	NTNG1	5349	5376	1	-22.5	1	0.00118494	0.412	0	0	-4.76182	18	27	7	3UTR		0	0
hsa-miR-6812-3p	XM_017000683	NTNG1	4850	4867	1	-21.6	0	2.05e-05	0.544	0	0	-15.3986	15	17	10	3UTR		0	0
hsa-miR-6813-3p	XM_017000683	NTNG1	3475	3501	1	-24.9	0	0.00146585	0.529	0	0	-8.32703	17	26	7	3UTR		0	0
hsa-miR-6814-3p	XM_017000683	NTNG1	3674	3706	1	-24.2	0	0.00493366	0.5	0	0	-7.65065	15	20	10	3UTR		0	0
hsa-miR-6816-5p	XM_017000683	NTNG1	2496	2540	1	-28.9	1	0.00519036	0.515	0	0	-3.79332	15	18	8	3UTR		0	0
hsa-miR-6821-3p	XM_017000683	NTNG1	3674	3700	1	-22.6	0	0.000809196	0.529	0	0	-7.0874	18	26	9	3UTR		0	0
hsa-miR-6822-3p	XM_017000683	NTNG1	3470	3497	1	-24.5	0	0.00189521	0.529	0	0	-9.18387	18	27	10	3UTR		0	0
hsa-miR-6823-3p	XM_017000683	NTNG1	5495	5523	1	-24.8	1	0.00742703	0.441	0	0	-4.957	17	28	9	3UTR		0	0
hsa-miR-6825-3p	XM_017000683	NTNG1	3690	3719	1	-27.1	0	0.000783571	0.5	0	0	-7.38222	18	29	7	3UTR		0	0
hsa-miR-6826-5p	XM_017000683	NTNG1	4071	4125	1	-21.9	1	0.0640083	0.544	0	0	-7.09331	16	22	8	3UTR		0	0
hsa-miR-6829-3p	XM_017000683	NTNG1	3664	3700	1	-23.9	1	0.000809196	0.529	0	0	-8.00486	15	36	9	3UTR		0	0
hsa-miR-6833-5p	XM_017000683	NTNG1	5204	5228	1	-22	0	0.113199	0.529	0	0	-13.2104	16	24	8	3UTR		0	0
hsa-miR-6833-5p	XM_017000683	NTNG1	5966	5987	1	-19.4	0	0.184384	0.632	0	0	-8.74633	17	21	10	3UTR		0	0
hsa-miR-6833-3p	XM_017000683	NTNG1	3475	3504	1	-22.7	1	0.0602868	0.559	0	0	-7.28438	17	20	10	3UTR		0	0
hsa-miR-6833-3p	XM_017000683	NTNG1	3693	3712	1	-23	0	0.00357041	0.5	0	0	-5.69428	17	19	13	3UTR		0	0
hsa-miR-6833-3p	XM_017000683	NTNG1	3958	3975	1	-20.5	0	4.76e-07	0.5	0	0	-8.82806	16	17	16	3UTR		0	0
hsa-miR-6835-3p	XM_017000683	NTNG1	3691	3719	1	-21	0	0.000783571	0.5	0	0	-12.3713	16	28	10	3UTR		1	1
hsa-miR-6835-3p	XM_017000683	NTNG1	5358	5377	1	-20.4	0	0.0014436	0.412	0	0	-10.8357	16	19	11	3UTR		1	1
hsa-miR-6780b-5p	XM_017000683	NTNG1	5204	5225	1	-23.7	1	0.0313023	0.515	0	0	-7.4978	18	21	12	3UTR		0	0
hsa-miR-6837-5p	XM_017000683	NTNG1	5842	5861	1	-25.6	1	0.000669893	0.456	0	0	-7.10297	16	19	10	3UTR		0	0
hsa-miR-6837-3p	XM_017000683	NTNG1	2669	2704	1	-26.1	1	0.00075525	0.5	0	0	-5.03583	19	24	10	3UTR		0	0
hsa-miR-6838-5p	XM_017000683	NTNG1	2267	2286	1	-22.3	0	5.73e-06	0.574	0	0	-10.9316	16	19	7	3UTR		0	0
hsa-miR-6840-3p	XM_017000683	NTNG1	5131	5152	1	-27.7	1	0.00373075	0.529	0	0	-8.93173	18	21	10	3UTR		0	0
hsa-miR-6841-5p	XM_017000683	NTNG1	5741	5762	1	-23	1	0.000174889	0.456	0	0	-5.08246	18	21	8	3UTR		0	0
hsa-miR-6841-3p	XM_017000683	NTNG1	3690	3707	1	-24.5	0	0.00525994	0.515	0	0	-10.6702	15	17	10	3UTR		0	0
hsa-miR-6845-3p	XM_017000683	NTNG1	3475	3500	1	-27.1	1	0.00195753	0.529	0	0	-6.58625	18	25	6	3UTR		0	0
hsa-miR-6846-3p	XM_017000683	NTNG1	3674	3707	1	-29.2	0	0.00525994	0.515	0	0	-8.82818	15	18	11	3UTR		0	0
hsa-miR-6847-5p	XM_017000683	NTNG1	2874	2897	1	-22.5	1	0.0609755	0.632	0	0	-4.957	19	23	9	3UTR		0	0
hsa-miR-6847-3p	XM_017000683	NTNG1	2223	2244	1	-23.3	1	0.0355902	0.544	0	0	-6.76235	17	21	11	3UTR		0	0
hsa-miR-6847-3p	XM_017000683	NTNG1	2084	2100	1	-20.9	0	3.07e-05	0.397	0	0	-9.56967	14	16	11	3UTR		0	0
hsa-miR-6848-3p	XM_017000683	NTNG1	5531	5553	1	-27.8	0	0.00478973	0.515	0	0	-9.28323	17	22	11	3UTR		0	0
hsa-miR-6851-5p	XM_017000683	NTNG1	2413	2439	1	-28.6	0	0.000501356	0.456	0	0	-10.226	20	26	9	3UTR		0	0
hsa-miR-6851-3p	XM_017000683	NTNG1	5349	5375	1	-24.8	1	0.000192148	0.426	0	0	-4.957	19	26	8	3UTR		0	0
hsa-miR-6853-5p	XM_017000683	NTNG1	5090	5107	1	-21	0	0.00301249	0.632	0	0	-8.05661	15	17	8	3UTR		0	0
hsa-miR-6856-3p	XM_017000683	NTNG1	5464	5480	1	-19.6	1	0.00906701	0.515	0	0	-7.78178	14	16	10	3UTR		0	0
hsa-miR-6858-5p	XM_017000683	NTNG1	3918	3952	1	-31.7	1	0.0148696	0.456	0	0	-6.28309	18	21	10	3UTR		0	0
hsa-miR-6858-5p	XM_017000683	NTNG1	5855	5880	1	-28.3	0	0.0405841	0.456	0	0	-7.62723	17	25	11	3UTR		0	0
hsa-miR-6859-5p	XM_017000683	NTNG1	4365	4414	1	-21.4	1	0.00403613	0.603	0	0	-3.79332	22	49	10	3UTR		0	0
hsa-miR-6859-3p	XM_017000683	NTNG1	5678	5699	1	-23.2	0	4.36e-05	0.574	0	0	-7.0584	17	21	13	3UTR		0	0
hsa-miR-6769b-3p	XM_017000683	NTNG1	5344	5367	1	-21.1	1	7.07e-06	0.471	0	0	-4.90607	14	18	8	3UTR		0	0
hsa-miR-6861-3p	XM_017000683	NTNG1	5398	5418	1	-21.1	0	0.00153614	0.485	0	0	-10.729	15	20	6	3UTR		0	0
hsa-miR-6862-5p	XM_017000683	NTNG1	3718	3774	1	-23.4	1	6.75e-06	0.559	0	0	-4.02637	16	25	9	3UTR		0	0
hsa-miR-6866-3p	XM_017000683	NTNG1	3692	3708	1	-20.3	0	0.0091854	0.529	0	0	-9.06247	15	16	15	3UTR		0	0
hsa-miR-6867-3p	XM_017000683	NTNG1	5494	5511	1	-18.4	0	0.10669	0.441	0	0	-6.57952	15	17	10	3UTR		0	0
hsa-miR-6868-3p	XM_017000683	NTNG1	3652	3697	1	-24.9	0	0.00023772	0.529	0	0	-5.48126	20	24	7	3UTR		0	0
hsa-miR-6869-3p	XM_017000683	NTNG1	2088	2106	1	-26	0	2.54e-05	0.412	0	0	-8.70402	15	18	9	3UTR		0	0
hsa-miR-6870-3p	XM_017000683	NTNG1	3487	3510	1	-22.9	0	0.0396409	0.574	0	0	-13.5538	16	23	8	3UTR		0	0
hsa-miR-6871-5p	XM_017000683	NTNG1	2528	2548	1	-24.2	0	0.131671	0.471	0	0	-8.82818	16	20	11	3UTR		0	0
hsa-miR-6871-3p	XM_017000683	NTNG1	5335	5377	1	-28.8	1	0.0014436	0.412	0	0	-8.3038	15	20	6	3UTR		0	0
hsa-miR-6874-3p	XM_017000683	NTNG1	4003	4022	1	-18.9	0	0.0230089	0.632	0	0	-15.7996	15	19	9	3UTR		0	0
hsa-miR-6875-5p	XM_017000683	NTNG1	5740	5763	1	-23.3	1	0.000297482	0.456	0	0	-4.65016	18	23	8	3UTR		0	0
hsa-miR-6875-3p	XM_017000683	NTNG1	3692	3712	1	-28.8	1	0.00357041	0.5	0	0	-8.09365	16	20	8	3UTR		0	0
hsa-miR-6878-5p	XM_017000683	NTNG1	5209	5224	1	-21.8	1	0.0467868	0.529	0	0	-5.3155	13	15	11	3UTR		0	0
hsa-miR-6879-5p	XM_017000683	NTNG1	2526	2549	1	-22.8	1	0.126749	0.485	0	0	-7.87558	16	23	6	3UTR		0	0
hsa-miR-6879-3p	XM_017000683	NTNG1	5349	5378	1	-28.6	0	0.00175631	0.412	0	0	-5.49511	20	29	7	3UTR		0	0
hsa-miR-6880-5p	XM_017000683	NTNG1	5977	5996	1	-23	1	0.314431	0.618	0	0	-8.00486	16	19	9	3UTR		0	0
hsa-miR-6881-5p	XM_017000683	NTNG1	5200	5225	1	-24.7	0	0.0313023	0.515	0	0	-12.0101	19	25	10	3UTR		0	0
hsa-miR-6881-3p	XM_017000683	NTNG1	3690	3708	1	-20.5	0	0.0091854	0.529	0	0	-13.8222	14	18	7	3UTR		0	0
hsa-miR-6882-3p	XM_017000683	NTNG1	3674	3701	1	-29	1	0.000687527	0.515	0	0	-4.957	20	27	10	3UTR		0	0
hsa-miR-6882-3p	XM_017000683	NTNG1	3950	3973	1	-28.5	0	1.82e-07	0.5	0	0	-13.6656	15	18	11	3UTR		0	0
hsa-miR-6884-5p	XM_017000683	NTNG1	5875	5896	1	-20.6	1	0.00050314	0.559	0	0	-5.10125	16	21	10	3UTR		0	0
hsa-miR-6885-5p	XM_017000683	NTNG1	2334	2357	1	-27.9	1	0.00041907	0.559	0	0	-6.32527	17	23	9	3UTR		0	0
hsa-miR-6887-3p	XM_017000683	NTNG1	3662	3708	1	-23.9	0	0.0091854	0.529	0	0	-10.8357	14	17	8	3UTR		0	0
hsa-miR-6887-3p	XM_017000683	NTNG1	3957	3974	1	-21.9	1	4.79e-07	0.515	0	0	-4.99396	15	17	12	3UTR		0	0
hsa-miR-6889-3p	XM_017000683	NTNG1	5517	5549	1	-21.9	1	2.34e-05	0.529	0	0	-3.93757	16	23	7	3UTR		0	0
hsa-miR-6889-3p	XM_017000683	NTNG1	5488	5505	1	-21.5	0	0.101852	0.471	0	0	-11.1732	15	17	11	3UTR		0	0
hsa-miR-6890-5p	XM_017000683	NTNG1	4087	4109	1	-24.9	1	0.0241104	0.559	0	0	-6.24644	16	22	6	3UTR		0	0
hsa-miR-6890-3p	XM_017000683	NTNG1	3674	3705	1	-21.7	1	0.00477556	0.485	0	0	-11.3517	13	16	10	3UTR		0	0
hsa-miR-6891-3p	XM_017000683	NTNG1	3688	3707	1	-22.7	1	0.00525994	0.515	0	0	-6.32496	16	19	8	3UTR		0	0
hsa-miR-6892-5p	XM_017000683	NTNG1	2525	2541	1	-23.3	0	0.00639343	0.5	0	0	-8.42777	15	16	15	3UTR		0	0
hsa-miR-6893-3p	XM_017000683	NTNG1	3665	3707	1	-27.5	1	0.00525994	0.515	0	0	-4.79441	18	22	10	3UTR		0	0
hsa-miR-6895-5p	XM_017000683	NTNG1	5836	5861	1	-22.2	1	0.000669893	0.456	0	0	-9.43035	16	25	9	3UTR		0	0
hsa-miR-6895-3p	XM_017000683	NTNG1	5527	5547	1	-23.9	0	1.33e-05	0.515	0	0	-13.4023	17	20	12	3UTR		0	0
hsa-miR-7106-5p	XM_017000683	NTNG1	2536	2556	1	-23.7	0	0.116302	0.485	0	0	-11.9129	14	20	9	3UTR		0	0
hsa-miR-7106-5p	XM_017000683	NTNG1	5193	5225	1	-23.2	1	0.0313023	0.515	0	0	-4.17062	19	32	8	3UTR		0	0
hsa-miR-7106-3p	XM_017000683	NTNG1	3475	3497	1	-25	1	0.00189521	0.529	0	0	-13.5529	17	22	7	3UTR		0	0
hsa-miR-7108-3p	XM_017000683	NTNG1	3674	3706	1	-30.7	1	0.00493366	0.5	0	0	-6.10696	14	17	8	3UTR		0	0
hsa-miR-7110-5p	XM_017000683	NTNG1	5869	5884	1	-24.4	1	0.0273802	0.485	0	0	-5.08276	13	15	7	3UTR		0	1
hsa-miR-7110-3p	XM_017000683	NTNG1	3950	3974	1	-29.6	0	4.79e-07	0.515	0	0	-8.31989	17	19	17	3UTR		0	0
hsa-miR-7111-5p	XM_017000683	NTNG1	2522	2541	1	-28.9	0	0.00639343	0.5	0	0	-7.48298	17	19	12	3UTR		0	0
hsa-miR-7111-5p	XM_017000683	NTNG1	4086	4107	1	-26.3	1	0.00725971	0.574	0	0	-6.32496	16	21	6	3UTR		0	0
hsa-miR-7112-3p	XM_017000683	NTNG1	5581	5608	1	-22.7	0	0.00548664	0.574	0	0	-9.28323	20	27	9	3UTR		0	0
hsa-miR-7113-3p	XM_017000683	NTNG1	3666	3708	1	-31	1	0.0091854	0.529	0	0	-7.78178	18	23	8	3UTR		0	0
hsa-miR-7114-5p	XM_017000683	NTNG1	5829	5847	1	-25.8	1	0.000453071	0.456	0	0	-5.38561	16	18	12	3UTR		0	0
hsa-miR-7114-5p	XM_017000683	NTNG1	2154	2177	1	-25.7	0	0.0245019	0.559	0	0	-5.69428	18	23	6	3UTR		0	0
hsa-miR-7114-3p	XM_017000683	NTNG1	5489	5504	1	-21.4	0	0.101877	0.485	0	0	-8.4155	12	15	7	3UTR		0	0
hsa-miR-7150	XM_017000683	NTNG1	4085	4104	1	-23.6	1	0.00232521	0.574	0	0	-6.13885	15	19	7	3UTR		0	0
hsa-miR-7151-5p	XM_017000683	NTNG1	5613	5633	1	-22.1	1	0.000617482	0.647	0	0	-6.98189	16	20	11	3UTR		0	0
hsa-miR-7151-3p	XM_017000683	NTNG1	3904	3924	1	-21.5	0	0.00733281	0.529	0	0	-6.51454	15	20	11	3UTR		0	0
hsa-miR-7161-3p	XM_017000683	NTNG1	5723	5773	1	-24.7	0	0.0093398	0.485	0	0	-9.54977	21	26	11	3UTR		0	0
hsa-miR-7159-5p	XM_017000683	NTNG1	2532	2593	1	-20	1	0.00223985	0.603	0	0	-6.67474	14	19	11	3UTR		0	0
hsa-miR-7162-5p	XM_017000683	NTNG1	3485	3498	1	-17.4	1	0.00230252	0.544	0	0	-7.05204	12	13	12	3UTR		0	0
hsa-miR-7704	XM_017000683	NTNG1	2413	2440	1	-23.6	1	0.000683248	0.441	0	0	-4.79441	17	27	7	3UTR		0	0
hsa-miR-4433b-3p	XM_017000683	NTNG1	5258	5270	1	-26.7	0	0.35265	0.456	0	0	-13.6656	11	12	11	3UTR		0	0
hsa-miR-7847-3p	XM_017000683	NTNG1	5973	5994	1	-22.7	1	0.313845	0.618	0	0	-6.09222	16	21	7	3UTR		0	0
hsa-miR-7849-3p	XM_017000683	NTNG1	3626	3652	1	-18.9	1	0.026918	0.632	0	0	-3.93757	20	26	9	3UTR		0	0
hsa-miR-7850-5p	XM_017000683	NTNG1	2073	2093	1	-24.7	0	8.01e-06	0.368	0	0	-12.5059	16	20	10	3UTR		0	0
hsa-miR-7850-5p	XM_017000683	NTNG1	3756	3777	1	-24	0	7.41e-06	0.544	0	0	-8.76019	18	21	12	3UTR		0	0
hsa-miR-7978	XM_017000683	NTNG1	4189	4211	1	-19.8	1	8.56e-06	0.603	0	0	-9.63999	15	22	7	3UTR		0	0
hsa-miR-8052	XM_017000683	NTNG1	4831	4854	1	-22.8	0	0.000643277	0.544	0	0	-15.1559	16	23	9	3UTR		0	0
hsa-miR-8054	XM_017000683	NTNG1	2544	2564	1	-20.4	1	0.0322954	0.485	0	0	-11.254	15	20	9	3UTR		0	0
hsa-miR-8055	XM_017000683	NTNG1	4430	4451	1	-22.5	0	0.00471138	0.529	0	0	-10.603	17	21	14	3UTR		0	0
hsa-miR-8056	XM_017000683	NTNG1	2827	2845	1	-19.7	0	0.00097386	0.706	0	0	-7.48304	15	18	11	3UTR		0	0
hsa-miR-8057	XM_017000683	NTNG1	2312	2323	1	-17.7	0	0.000409681	0.529	0	0	-8.33988	10	11	10	3UTR		0	0
hsa-miR-8057	XM_017000683	NTNG1	4731	4749	1	-17.3	1	0.000200668	0.588	0	0	-6.28309	15	18	8	3UTR		0	0
hsa-miR-8071	XM_017000683	NTNG1	4100	4124	1	-24.8	1	0.0699295	0.544	0	0	-3.93757	20	24	8	3UTR		0	0
hsa-miR-8071	XM_017000683	NTNG1	2161	2182	1	-22.6	0	0.017992	0.544	0	0	-6.85796	16	21	9	3UTR		0	0
hsa-miR-8075	XM_017000683	NTNG1	5190	5216	1	-23.2	0	0.00537146	0.529	0	0	-9.33732	18	26	8	3UTR		0	0
hsa-miR-8077	XM_017000683	NTNG1	5762	5784	1	-26.6	0	0.000199133	0.529	0	0	-6.62614	18	22	8	3UTR		0	0
hsa-miR-8077	XM_017000683	NTNG1	2155	2173	1	-24.8	1	0.233559	0.559	0	0	-6.24613	14	18	10	3UTR		0	0
hsa-miR-8085	XM_017000683	NTNG1	5198	5225	1	-25	1	0.0313023	0.515	0	0	-10.3422	17	19	17	3UTR		0	0
hsa-let-7a-5p	XM_011541021	NTNG1	4220	4233	1	-16.7	0	0.00222982	0.456	0	0	-8.03672	11	13	9	3UTR		0	0
hsa-let-7a-2-3p	XM_011541021	NTNG1	5808	5838	1	-26.8	0	1.66e-05	0.529	0	0	-8.30604	18	22	12	3UTR		0	0
hsa-let-7d-5p	XM_011541021	NTNG1	4378	4398	1	-22.3	0	0.0161645	0.559	0	0	-7.75139	16	20	6	3UTR		0	0
hsa-let-7d-3p	XM_011541021	NTNG1	3775	3790	1	-22.6	0	0.00195753	0.529	0	0	-20.1593	13	15	7	3UTR		0	0
hsa-let-7e-3p	XM_011541021	NTNG1	5791	5838	1	-24.8	0	1.66e-05	0.529	0	0	-8.31989	18	22	13	3UTR		0	0
hsa-miR-17-3p	XM_011541021	NTNG1	4069	4091	1	-19.8	0	0.0147669	0.603	0	0	-14.1648	16	22	10	3UTR		0	0
hsa-miR-18a-5p	XM_011541021	NTNG1	6014	6054	1	-24.3	0	0.000190288	0.471	0	0	-6.57398	19	22	11	3UTR		0	0
hsa-miR-18a-5p	XM_011541021	NTNG1	4700	4721	1	-21	1	0.0058764	0.544	0	0	-6.08354	18	21	12	3UTR		0	0
hsa-miR-22-3p	XM_011541021	NTNG1	6132	6156	1	-19.5	1	0.00166211	0.441	0	0	-4.76182	18	24	14	3UTR		1	0
hsa-miR-23a-5p	XM_011541021	NTNG1	5509	5529	1	-25.5	1	0.0102982	0.485	0	0	-9.2861	15	20	10	3UTR		0	0
hsa-miR-24-3p	XM_011541021	NTNG1	3439	3462	1	-24.6	1	7.57e-05	0.588	0	0	-4.957	20	23	10	3UTR		0	0
hsa-miR-25-5p	XM_011541021	NTNG1	3915	3949	1	-23.8	1	0.0140484	0.588	0	0	-3.93757	17	34	10	3UTR		0	0
hsa-miR-25-3p	XM_011541021	NTNG1	2972	2993	1	-22.2	1	0.000388183	0.515	0	0	-9.54631	17	21	7	3UTR		0	0
hsa-miR-26a-1-3p	XM_011541021	NTNG1	3965	3988	1	-19.9	0	0.000224648	0.529	0	0	-11.9403	18	23	8	3UTR		0	0
hsa-miR-26b-3p	XM_011541021	NTNG1	3770	3790	1	-20.1	1	0.00195753	0.529	0	0	-9.93282	18	20	16	3UTR		0	0
hsa-miR-33a-3p	XM_011541021	NTNG1	6197	6230	1	-25.9	0	0.0160561	0.618	0	0	-9.33931	16	19	9	3UTR		0	1
hsa-miR-29b-1-5p	XM_011541021	NTNG1	2792	2821	1	-20.9	0	0.000100753	0.5	0	0	-8.86514	18	22	12	3UTR		0	0
hsa-miR-103a-3p	XM_011541021	NTNG1	6137	6162	1	-23.8	0	0.0266954	0.441	0	0	-6.51454	20	25	10	3UTR		0	0
hsa-miR-105-5p	XM_011541021	NTNG1	4591	4608	1	-18.6	0	0.040511	0.691	0	0	-17.1102	13	17	11	3UTR		0	0
hsa-miR-107	XM_011541021	NTNG1	6142	6162	1	-23.7	0	0.0266954	0.441	0	0	-6.51454	17	20	10	3UTR		0	0
hsa-miR-129-1-3p	XM_011541021	NTNG1	5141	5159	1	-17.8	1	0.000139527	0.544	0	0	-5.9255	12	18	8	3UTR		0	0
hsa-miR-148a-3p	XM_011541021	NTNG1	3419	3460	1	-18.9	0	6.74e-05	0.588	0	0	-7.08104	14	17	9	3UTR		0	0
hsa-miR-139-5p	XM_011541021	NTNG1	5688	5715	1	-24.1	1	0.00190405	0.485	0	0	-7.00542	18	21	9	3UTR		0	0
hsa-miR-181b-5p	XM_011541021	NTNG1	2509	2524	1	-20.2	0	0.00867054	0.588	0	0	-20.4803	13	15	7	3UTR		0	0
hsa-miR-183-3p	XM_011541021	NTNG1	5984	6007	1	-18.7	0	0.00404903	0.5	0	0	-5.83853	17	23	6	3UTR		0	0
hsa-miR-196a-3p	XM_011541021	NTNG1	3313	3326	1	-16	1	0.00107317	0.706	0	0	-5.61866	12	13	12	3UTR		0	0
hsa-miR-203a-3p	XM_011541021	NTNG1	5681	5709	1	-19.2	0	0.00043796	0.471	0	0	-10.4313	17	22	12	3UTR		0	0
hsa-miR-205-3p	XM_011541021	NTNG1	3406	3448	1	-19.9	0	0.286166	0.544	0	0	-8.76019	16	20	14	3UTR		0	0
hsa-miR-210-5p	XM_011541021	NTNG1	2731	2784	1	-25.2	1	0.000479282	0.588	0	0	-7.14013	20	53	10	3UTR		0	0
hsa-miR-210-3p	XM_011541021	NTNG1	5548	5567	1	-23.7	1	0.406768	0.441	0	0	-9.2861	14	19	10	3UTR		0	0
hsa-miR-211-5p	XM_011541021	NTNG1	5641	5664	1	-26.3	1	9.02e-05	0.426	0	0	-4.957	19	23	10	3UTR		0	0
hsa-miR-211-3p	XM_011541021	NTNG1	2727	2775	1	-24.5	0	1.57e-05	0.559	0	0	-11.8241	18	23	15	3UTR		0	0
hsa-miR-214-3p	XM_011541021	NTNG1	2802	2822	1	-24.8	1	0.00248312	0.515	0	0	-8.02485	16	20	10	3UTR		0	0
hsa-miR-216a-3p	XM_011541021	NTNG1	5682	5714	1	-22	1	0.00159315	0.485	0	0	-5.18008	16	21	9	3UTR		0	0
hsa-miR-221-3p	XM_011541021	NTNG1	2447	2471	1	-21.3	0	0.0155726	0.544	0	0	-7.24999	15	19	11	3UTR		0	0
hsa-miR-223-5p	XM_011541021	NTNG1	2758	2777	1	-18.9	1	2.37e-05	0.559	0	0	-5.08246	17	19	14	3UTR		0	0
hsa-miR-200b-5p	XM_011541021	NTNG1	3887	3927	1	-23.8	0	0.00445843	0.662	0	0	-9.69585	16	18	16	3UTR		0	0
hsa-miR-200b-3p	XM_011541021	NTNG1	2578	2610	1	-19.6	0	0.000198018	0.559	0	0	-13.6656	16	20	12	3UTR		0	0
hsa-miR-15b-5p	XM_011541021	NTNG1	4371	4388	1	-18.9	1	0.000542431	0.529	0	0	-13.2745	15	17	11	3UTR		0	0
hsa-miR-23b-3p	XM_011541021	NTNG1	4925	4944	1	-20.2	1	0.00234103	0.706	0	0	-3.93757	16	19	10	3UTR		0	0
hsa-miR-125b-1-3p	XM_011541021	NTNG1	2801	2827	1	-23.7	0	0.00369268	0.515	0	0	-7.9845	18	26	6	3UTR		0	0
hsa-miR-138-5p	XM_011541021	NTNG1	4734	4756	1	-22.8	1	0.000848085	0.544	0	0	-5.9255	17	22	9	3UTR		0	0
hsa-miR-138-5p	XM_011541021	NTNG1	4817	4844	1	-23.1	0	0.0205301	0.706	0	0	-11.949	17	27	11	3UTR		0	0
hsa-miR-141-3p	XM_011541021	NTNG1	2454	2470	1	-17.9	1	0.0149896	0.544	0	0	-5.9255	12	15	10	3UTR		0	0
hsa-miR-153-5p	XM_011541021	NTNG1	2629	2659	1	-19.3	0	0.0537012	0.559	0	0	-11.6667	19	30	10	3UTR		0	0
hsa-miR-125a-5p	XM_011541021	NTNG1	3751	3792	1	-21.2	0	0.00155467	0.544	0	0	-9.81978	15	19	9	3UTR		0	0
hsa-miR-125b-2-3p	XM_011541021	NTNG1	5686	5705	1	-22.9	0	0.000905153	0.485	0	0	-8.40165	15	19	9	3UTR		0	0
hsa-miR-127-3p	XM_011541021	NTNG1	2365	2384	1	-22.8	0	1.19e-05	0.382	0	0	-10.1659	16	19	11	3UTR		0	0
hsa-miR-129-2-3p	XM_011541021	NTNG1	5141	5159	1	-17.8	1	0.000139527	0.544	0	0	-5.9255	12	18	8	3UTR		0	0
hsa-miR-138-1-3p	XM_011541021	NTNG1	5684	5704	1	-25	1	0.000709122	0.485	0	0	-13.2279	16	20	9	3UTR		0	0
hsa-miR-150-5p	XM_011541021	NTNG1	4239	4263	1	-23	0	1.82e-07	0.5	0	0	-8.02794	17	24	6	3UTR		0	0
hsa-miR-150-3p	XM_011541021	NTNG1	2372	2391	1	-28	1	1.3e-05	0.382	0	0	-4.76182	15	19	13	3UTR		0	0
hsa-miR-188-3p	XM_011541021	NTNG1	5385	5407	1	-20.2	0	0.000107103	0.574	0	0	-8.02599	16	22	11	3UTR		0	0
hsa-miR-193a-5p	XM_011541021	NTNG1	5469	5488	1	-24	1	0.00197773	0.485	0	0	-8.00486	16	19	9	3UTR		0	0
hsa-miR-195-3p	XM_011541021	NTNG1	4302	4323	1	-20.2	0	0.00216164	0.618	0	0	-11.1417	18	21	9	3UTR		0	0
hsa-miR-320a	XM_011541021	NTNG1	2833	2854	1	-21.6	1	0.0322954	0.485	0	0	-4.65016	19	21	14	3UTR		0	0
hsa-miR-128-2-5p	XM_011541021	NTNG1	2457	2487	1	-21.5	0	0.0837291	0.544	0	0	-8.32703	16	30	8	3UTR		0	0
hsa-miR-194-3p	XM_011541021	NTNG1	4081	4101	1	-24.9	0	0.00703663	0.588	0	0	-8.05661	17	20	10	3UTR		0	0
hsa-miR-30c-1-3p	XM_011541021	NTNG1	5463	5516	1	-24.1	1	0.0408152	0.515	0	0	-4.90607	14	16	14	3UTR		0	0
hsa-miR-200a-3p	XM_011541021	NTNG1	3118	3139	1	-21.5	0	0.00259119	0.676	0	0	-5.83853	17	21	12	3UTR		0	0
hsa-miR-200a-3p	XM_011541021	NTNG1	2448	2470	1	-17.9	1	0.0149896	0.544	0	0	-5.9255	12	15	10	3UTR		0	0
hsa-miR-302a-3p	XM_011541021	NTNG1	2507	2525	1	-20.8	0	0.00852985	0.574	0	0	-7.48304	16	18	11	3UTR		0	0
hsa-miR-299-3p	XM_011541021	NTNG1	4388	4402	1	-17.6	1	0.0529081	0.559	0	0	-5.81821	12	14	7	3UTR		0	0
hsa-miR-363-5p	XM_011541021	NTNG1	4933	4950	1	-19.1	1	0.00658544	0.691	0	0	-4.65016	15	17	12	3UTR		0	0
hsa-miR-365a-5p	XM_011541021	NTNG1	6121	6150	1	-24.4	0	0.000495396	0.456	0	0	-10.3702	20	29	11	3UTR		0	0
hsa-miR-365b-5p	XM_011541021	NTNG1	6042	6066	1	-27.5	1	0.028751	0.485	0	0	-3.93757	19	24	10	3UTR		0	0
hsa-miR-302c-3p	XM_011541021	NTNG1	4237	4257	1	-20	0	2.73e-05	0.471	0	0	-14.7943	17	20	11	3UTR		0	0
hsa-miR-367-5p	XM_011541021	NTNG1	4042	4091	1	-21.6	1	0.0147669	0.603	0	0	-3.79332	15	17	15	3UTR		0	0
hsa-miR-369-5p	XM_011541021	NTNG1	6019	6038	1	-17.5	1	1.97e-05	0.485	0	0	-4.90607	14	19	9	3UTR		0	0
hsa-miR-372-3p	XM_011541021	NTNG1	4747	4768	1	-17.7	1	0.000845626	0.515	0	0	-14.5171	16	21	9	3UTR		0	0
hsa-miR-377-5p	XM_011541021	NTNG1	3503	3527	1	-20.7	1	0.00497892	0.603	0	0	-6.76235	19	24	9	3UTR		0	0
hsa-miR-378a-5p	XM_011541021	NTNG1	3758	3780	1	-24.5	0	3.03e-07	0.515	0	0	-5.57006	18	22	13	3UTR		0	0
hsa-miR-378a-3p	XM_011541021	NTNG1	5484	5505	1	-23.6	0	0.00478103	0.515	0	0	-8.70704	17	21	10	3UTR		0	0
hsa-miR-330-5p	XM_011541021	NTNG1	5423	5443	1	-23.9	1	0.00392923	0.544	0	0	-5.22701	18	20	14	3UTR		0	0
hsa-miR-330-5p	XM_011541021	NTNG1	5127	5147	1	-22.9	1	0.00324593	0.574	0	0	-6.9638	18	20	12	3UTR		0	0
hsa-miR-342-3p	XM_011541021	NTNG1	5660	5677	1	-24.6	1	0.000159623	0.382	0	0	-11.1852	15	17	9	3UTR		0	0
hsa-miR-342-3p	XM_011541021	NTNG1	3440	3455	1	-19.8	1	0.000552635	0.603	0	0	-4.957	14	15	14	3UTR		0	0
hsa-miR-326	XM_011541021	NTNG1	3765	3791	1	-25.4	0	0.00146585	0.529	0	0	-7.65065	17	26	8	3UTR		0	0
hsa-miR-135b-5p	XM_011541021	NTNG1	5142	5155	1	-18.1	0	0.00342652	0.544	0	0	-9.54656	12	13	12	3UTR		1	1
hsa-miR-135b-3p	XM_011541021	NTNG1	5224	5247	1	-21.1	1	0.0020456	0.662	0	0	-7.28438	18	23	11	3UTR		0	0
hsa-miR-148b-3p	XM_011541021	NTNG1	6203	6223	1	-20.1	1	0.0430588	0.559	0	0	-6.76235	18	20	15	3UTR		0	0
hsa-miR-148b-3p	XM_011541021	NTNG1	3438	3460	1	-18.9	0	6.74e-05	0.588	0	0	-6.89492	14	17	9	3UTR		0	0
hsa-miR-148b-3p	XM_011541021	NTNG1	2901	2918	1	-16.9	0	0.0284496	0.574	0	0	-8.66051	14	17	9	3UTR		0	0
hsa-miR-331-3p	XM_011541021	NTNG1	5667	5696	1	-30.5	0	3.57e-08	0.485	0	0	-5.83853	15	19	6	3UTR		0	0
hsa-miR-324-3p	XM_011541021	NTNG1	6013	6032	1	-25.1	0	0.000317523	0.5	0	0	-6.51454	16	19	10	3UTR		0	0
hsa-miR-339-3p	XM_011541021	NTNG1	4734	4755	1	-25.7	0	0.00128142	0.559	0	0	-13.4406	18	21	12	3UTR		0	0
hsa-miR-345-5p	XM_011541021	NTNG1	5684	5703	1	-25.7	0	0.00052424	0.471	0	0	-13.6138	15	19	9	3UTR		0	0
hsa-miR-345-5p	XM_011541021	NTNG1	5638	5658	1	-25.5	0	7.51e-06	0.471	0	0	-9.79437	16	20	9	3UTR		0	0
hsa-miR-346	XM_011541021	NTNG1	3979	4001	1	-26.1	0	0.232624	0.5	0	0	-10.2048	18	22	10	3UTR		0	0
hsa-miR-18b-5p	XM_011541021	NTNG1	6035	6054	1	-20.8	0	0.000190288	0.471	0	0	-6.57398	17	19	11	3UTR		0	0
hsa-miR-18b-3p	XM_011541021	NTNG1	3976	3997	1	-22.8	0	0.00525994	0.515	0	0	-9.18387	16	21	5	3UTR		0	0
hsa-miR-20b-3p	XM_011541021	NTNG1	4370	4388	1	-20.7	0	0.000542431	0.529	0	0	-6.74759	14	18	12	3UTR		0	0
hsa-miR-20b-3p	XM_011541021	NTNG1	6331	6351	1	-19.5	1	0.00678056	0.574	0	0	-5.19005	18	20	10	3UTR		0	0
hsa-miR-429	XM_011541021	NTNG1	2456	2470	1	-15.9	1	0.0149896	0.544	0	0	-5.9255	12	14	10	3UTR		0	0
hsa-miR-450a-1-3p	XM_011541021	NTNG1	4005	4051	1	-17.7	1	0.0173168	0.574	0	0	-12.4965	13	19	8	3UTR		0	0
hsa-miR-433-5p	XM_011541021	NTNG1	4550	4567	1	-21.1	0	0.00472757	0.706	0	0	-8.33988	10	12	10	3UTR		0	0
hsa-miR-433-3p	XM_011541021	NTNG1	6037	6062	1	-22	0	0.00296355	0.485	0	0	-8.25873	19	25	8	3UTR		0	0
hsa-miR-329-5p	XM_011541021	NTNG1	5519	5539	1	-21.4	0	0.00055247	0.471	0	0	-9.81332	16	20	13	3UTR		0	0
hsa-miR-412-3p	XM_011541021	NTNG1	5817	5833	1	-22.8	0	2.38e-05	0.5	0	0	-17.8457	14	16	13	3UTR		0	0
hsa-miR-483-5p	XM_011541021	NTNG1	3180	3200	1	-20.9	1	0.00727455	0.632	0	0	-5.41313	18	20	9	3UTR		0	0
hsa-miR-483-3p	XM_011541021	NTNG1	3775	3802	1	-22.2	1	0.0300814	0.574	0	0	-6.76235	19	27	6	3UTR		0	0
hsa-miR-483-3p	XM_011541021	NTNG1	3970	3995	1	-21.9	1	0.00477556	0.485	0	0	-5.52986	19	25	8	3UTR		0	0
hsa-miR-483-3p	XM_011541021	NTNG1	5783	5800	1	-22	0	0.111023	0.441	0	0	-7.57093	14	17	9	3UTR		0	0
hsa-miR-483-3p	XM_011541021	NTNG1	4245	4264	1	-21.3	0	4.79e-07	0.515	0	0	-8.84192	16	19	10	3UTR		0	0
hsa-miR-486-3p	XM_011541021	NTNG1	4377	4396	1	-26.9	1	0.00353243	0.574	0	0	-6.09222	16	19	9	3UTR		0	0
hsa-miR-487a-5p	XM_011541021	NTNG1	3982	4004	1	-22.3	0	0.000174417	0.5	0	0	-6.50069	17	22	6	3UTR		0	0
hsa-miR-490-3p	XM_011541021	NTNG1	5966	5999	1	-34.4	1	0.000119166	0.559	0	0	-4.957	19	23	16	3UTR		0	0
hsa-miR-146b-3p	XM_011541021	NTNG1	2972	2996	1	-24.9	0	0.00155536	0.5	0	0	-7.38222	18	24	10	3UTR		0	0
hsa-miR-146b-3p	XM_011541021	NTNG1	5135	5160	1	-21.8	0	0.000420006	0.559	0	0	-10.9622	17	25	10	3UTR		0	0
hsa-miR-494-5p	XM_011541021	NTNG1	3979	4005	1	-22.7	0	0.000186434	0.485	0	0	-10.4278	20	26	11	3UTR		0	0
hsa-miR-193b-5p	XM_011541021	NTNG1	2711	2730	1	-20.6	1	0.000683248	0.441	0	0	-8.55011	13	19	7	3UTR		0	0
hsa-miR-512-5p	XM_011541021	NTNG1	5683	5704	1	-22.8	0	0.000709122	0.485	0	0	-9.18534	17	21	12	3UTR		0	0
hsa-miR-512-5p	XM_011541021	NTNG1	6041	6073	1	-22.1	0	0.000185172	0.529	0	0	-6.51454	19	32	14	3UTR		0	0
hsa-miR-520f-3p	XM_011541021	NTNG1	2930	2950	1	-21.3	0	0.0230435	0.515	0	0	-7.98902	17	20	11	3UTR		0	0
hsa-miR-519c-5p	XM_011541021	NTNG1	6116	6154	1	-19.7	0	0.000982227	0.456	0	0	-13.0295	16	38	9	3UTR		0	0
hsa-miR-519c-3p	XM_011541021	NTNG1	4679	4720	1	-21.6	1	0.00139902	0.559	0	0	-3.93757	20	23	13	3UTR		0	0
hsa-miR-520a-3p	XM_011541021	NTNG1	3973	3990	1	-22.2	0	0.000809196	0.529	0	0	-9.54656	16	17	16	3UTR		0	0
hsa-miR-519b-5p	XM_011541021	NTNG1	6116	6154	1	-19.7	0	0.000982227	0.456	0	0	-13.0295	16	38	9	3UTR		0	0
hsa-miR-525-5p	XM_011541021	NTNG1	5659	5678	1	-23.6	0	0.000121432	0.397	0	0	-8.00792	16	19	11	3UTR		0	0
hsa-miR-525-5p	XM_011541021	NTNG1	5582	5598	1	-21.7	1	1.91e-09	0.471	0	0	-10.8446	14	16	10	3UTR		0	0
hsa-miR-523-5p	XM_011541021	NTNG1	6116	6154	1	-19.7	0	0.000982227	0.456	0	0	-13.0295	16	38	9	3UTR		0	0
hsa-miR-520b	XM_011541021	NTNG1	2930	2950	1	-20.7	0	0.0230435	0.515	0	0	-10.6336	17	20	11	3UTR		0	0
hsa-miR-520c-3p	XM_011541021	NTNG1	5587	5617	1	-20.8	0	0.00160394	0.456	0	0	-9.54656	17	30	10	3UTR		0	0
hsa-miR-517a-3p	XM_011541021	NTNG1	6320	6342	1	-23.5	0	0.00184793	0.574	0	0	-10.6336	18	22	10	3UTR		0	0
hsa-miR-517b-3p	XM_011541021	NTNG1	6320	6342	1	-23.5	0	0.00184793	0.574	0	0	-10.6336	18	22	10	3UTR		0	0
hsa-miR-520g-3p	XM_011541021	NTNG1	6320	6343	1	-20.8	0	0.0020231	0.574	0	0	-12.3328	18	23	10	3UTR		0	0
hsa-miR-516b-3p	XM_011541021	NTNG1	5587	5617	1	-22.9	1	0.00160394	0.456	0	0	-3.93757	17	30	10	3UTR		0	0
hsa-miR-518e-5p	XM_011541021	NTNG1	6116	6154	1	-19.7	0	0.000982227	0.456	0	0	-13.0295	16	38	9	3UTR		0	0
hsa-miR-518e-3p	XM_011541021	NTNG1	6321	6343	1	-20.9	0	0.0020231	0.574	0	0	-11.3897	17	22	9	3UTR		0	0
hsa-miR-517c-3p	XM_011541021	NTNG1	6320	6342	1	-21.8	0	0.00184793	0.574	0	0	-10.6336	18	22	10	3UTR		0	0
hsa-miR-522-5p	XM_011541021	NTNG1	6116	6154	1	-19.7	0	0.000982227	0.456	0	0	-13.0295	16	38	9	3UTR		0	0
hsa-miR-519a-5p	XM_011541021	NTNG1	6116	6154	1	-19.7	0	0.000982227	0.456	0	0	-13.0295	16	38	9	3UTR		0	0
hsa-miR-516a-3p	XM_011541021	NTNG1	5587	5617	1	-22.9	1	0.00160394	0.456	0	0	-3.93757	17	30	10	3UTR		0	0
hsa-miR-500a-3p	XM_011541021	NTNG1	2731	2777	1	-24.5	1	2.37e-05	0.559	0	0	-3.93757	17	21	9	3UTR		0	0
hsa-miR-502-3p	XM_011541021	NTNG1	2738	2778	1	-26	1	2.9e-05	0.544	0	0	-3.93757	18	22	10	3UTR		0	1
hsa-miR-502-3p	XM_011541021	NTNG1	3910	3929	1	-21.1	1	0.00538332	0.662	0	0	-5.81384	16	19	7	3UTR		0	1
hsa-miR-503-5p	XM_011541021	NTNG1	2603	2636	1	-21.7	0	0.000326367	0.5	0	0	-15.7411	16	33	9	3UTR		0	0
hsa-miR-508-5p	XM_011541021	NTNG1	5660	5704	1	-23.8	1	0.000709122	0.485	0	0	-4.79441	19	44	8	3UTR		0	0
hsa-miR-514a-5p	XM_011541021	NTNG1	5068	5091	1	-19.8	0	0.0276868	0.618	0	0	-9.54656	17	23	13	3UTR		0	0
hsa-miR-532-5p	XM_011541021	NTNG1	5178	5199	1	-20.1	0	0.0287643	0.676	0	0	-8.93978	17	21	11	3UTR		0	0
hsa-miR-455-3p	XM_011541021	NTNG1	2510	2523	1	-19.9	0	0.0124688	0.574	0	0	-8.60958	11	13	9	3UTR		0	0
hsa-miR-487b-3p	XM_011541021	NTNG1	6333	6347	1	-21	0	0.00584583	0.588	0	0	-10.8357	13	14	13	3UTR		0	0
hsa-miR-551a	XM_011541021	NTNG1	3768	3787	1	-24.8	0	0.00189521	0.529	0	0	-11.8972	16	19	11	3UTR		0	0
hsa-miR-552-3p	XM_011541021	NTNG1	2918	2964	1	-19.8	1	0.0577428	0.456	0	0	-4.02637	14	20	9	3UTR		0	0
hsa-miR-92b-5p	XM_011541021	NTNG1	2809	2831	1	-28.1	1	0.00639343	0.5	0	0	-6.9954	19	22	14	3UTR		0	0
hsa-miR-92b-3p	XM_011541021	NTNG1	5817	5837	1	-22.7	0	1.33e-05	0.515	0	0	-9.65801	16	20	10	3UTR		0	0
hsa-miR-555	XM_011541021	NTNG1	6110	6150	1	-21.6	0	0.000495396	0.456	0	0	-6.80703	13	16	8	3UTR		0	0
hsa-miR-555	XM_011541021	NTNG1	5335	5353	1	-20.8	0	0.00375399	0.721	0	0	-5.69428	16	18	14	3UTR		0	0
hsa-miR-570-5p	XM_011541021	NTNG1	2624	2643	1	-22.7	0	5.42e-06	0.544	0	0	-10.3719	16	19	13	3UTR		0	0
hsa-miR-571	XM_011541021	NTNG1	4488	4512	1	-21.3	0	7.66e-05	0.588	0	0	-5.72816	16	19	10	3UTR		0	0
hsa-miR-574-5p	XM_011541021	NTNG1	2425	2447	1	-23.3	0	0.276025	0.574	0	0	-6.74759	17	22	12	3UTR		0	0
hsa-miR-578	XM_011541021	NTNG1	5617	5654	1	-23	1	8.16e-07	0.485	0	0	-6.76235	20	24	15	3UTR		0	0
hsa-miR-581	XM_011541021	NTNG1	3758	3780	1	-18.7	0	3.03e-07	0.515	0	0	-6.07158	14	16	14	3UTR		0	0
hsa-miR-582-5p	XM_011541021	NTNG1	6185	6237	1	-27	1	0.000646085	0.632	0	0	-6.08354	17	21	12	3UTR		0	0
hsa-miR-585-3p	XM_011541021	NTNG1	2692	2717	1	-21.4	1	2e-05	0.441	0	0	-11.254	15	17	15	3UTR		0	0
hsa-miR-548a-3p	XM_011541021	NTNG1	3567	3612	1	-16.8	0	0.0186875	0.706	0	0	-15.5666	12	14	12	3UTR		0	0
hsa-miR-588	XM_011541021	NTNG1	4489	4509	1	-19.3	1	5.79e-05	0.588	0	0	-8.06181	11	15	8	3UTR		0	0
hsa-miR-589-3p	XM_011541021	NTNG1	5821	5846	1	-21.4	0	0.0173421	0.5	0	0	-16.9706	16	25	9	3UTR		0	0
hsa-miR-591	XM_011541021	NTNG1	6154	6191	1	-20.9	1	1.37e-05	0.544	0	0	-5.76291	13	15	13	3UTR		0	0
hsa-miR-595	XM_011541021	NTNG1	4754	4777	1	-22.4	1	0.0547174	0.588	0	0	-6.03692	17	23	9	3UTR		0	0
hsa-miR-596	XM_011541021	NTNG1	3764	3790	1	-24.8	0	0.00195753	0.529	0	0	-7.80367	17	26	8	3UTR		0	0
hsa-miR-598-5p	XM_011541021	NTNG1	6014	6040	1	-22.4	1	2.72e-06	0.485	0	0	-5.52986	19	26	9	3UTR		0	0
hsa-miR-601	XM_011541021	NTNG1	5495	5518	1	-24.4	0	0.113199	0.529	0	0	-12.6723	17	23	10	3UTR		0	0
hsa-miR-611	XM_011541021	NTNG1	5448	5475	1	-27.6	0	0.000141634	0.5	0	0	-7.07355	18	27	6	3UTR		0	0
hsa-miR-615-3p	XM_011541021	NTNG1	5459	5480	1	-25.1	0	3.2e-05	0.515	0	0	-9.60059	18	21	12	3UTR		0	0
hsa-miR-618	XM_011541021	NTNG1	3946	3997	1	-20.8	0	0.00525994	0.515	0	0	-6.51454	18	22	11	3UTR		0	0
hsa-miR-619-5p	XM_011541021	NTNG1	4370	4392	1	-23	0	0.0016182	0.544	0	0	-9.70971	17	22	9	3UTR		0	0
hsa-miR-621	XM_011541021	NTNG1	4369	4389	1	-22.8	0	0.000852336	0.544	0	0	-10.5724	18	20	12	3UTR		0	0
hsa-miR-624-5p	XM_011541021	NTNG1	2778	2801	1	-18.2	0	0.0388422	0.485	0	0	-10.9252	17	23	11	3UTR		0	0
hsa-miR-627-3p	XM_011541021	NTNG1	4128	4141	1	-17.3	0	0.000768367	0.632	0	0	-13.6656	12	13	12	3UTR		0	0
hsa-miR-629-3p	XM_011541021	NTNG1	6192	6229	1	-19.9	1	0.0176715	0.603	0	0	-8.97335	16	21	9	3UTR		0	0
hsa-miR-33b-3p	XM_011541021	NTNG1	6027	6049	1	-27.6	1	0.000271442	0.471	0	0	-5.9255	17	22	7	3UTR		0	0
hsa-miR-632	XM_011541021	NTNG1	2367	2406	1	-28.1	1	0.000178023	0.456	0	0	-4.79441	17	22	13	3UTR		0	0
hsa-miR-637	XM_011541021	NTNG1	2604	2646	1	-28.9	0	1.45e-05	0.559	0	0	-10.0748	18	42	8	3UTR		0	0
hsa-miR-642a-5p	XM_011541021	NTNG1	3754	3792	1	-23.2	1	0.00155467	0.544	0	0	-11.254	18	38	9	3UTR		0	0
hsa-miR-644a	XM_011541021	NTNG1	2474	2491	1	-20.5	0	0.0254706	0.544	0	0	-11.0886	14	17	11	3UTR		0	0
hsa-miR-650	XM_011541021	NTNG1	3887	3920	1	-26	0	0.0642769	0.632	0	0	-9.54656	16	33	8	3UTR		0	0
hsa-miR-650	XM_011541021	NTNG1	4377	4393	1	-22	1	0.00195317	0.559	0	0	-6.90779	14	16	12	3UTR		0	0
hsa-miR-652-5p	XM_011541021	NTNG1	5583	5601	1	-26.5	1	4.53e-10	0.471	0	0	-7.39609	16	18	10	3UTR		0	0
hsa-miR-654-5p	XM_011541021	NTNG1	6131	6149	1	-22.1	0	0.000898817	0.456	0	0	-12.8934	15	18	8	3UTR		0	0
hsa-miR-659-3p	XM_011541021	NTNG1	5463	5488	1	-25.1	1	0.00197773	0.485	0	0	-8.3038	18	25	9	3UTR		0	0
hsa-miR-758-3p	XM_011541021	NTNG1	6103	6119	1	-18	0	0.00528453	0.471	0	0	-8.49178	13	16	8	3UTR		0	0
hsa-miR-671-3p	XM_011541021	NTNG1	5684	5701	1	-25.2	0	2.64e-05	0.485	0	0	-5.83853	15	17	10	3UTR		0	0
hsa-miR-668-3p	XM_011541021	NTNG1	5640	5659	1	-22.6	1	8.09e-06	0.456	0	0	-8.38244	15	19	8	3UTR		0	0
hsa-miR-767-5p	XM_011541021	NTNG1	3511	3530	1	-22	0	0.0105425	0.632	0	0	-13.8149	16	19	12	3UTR		0	0
hsa-miR-1224-3p	XM_011541021	NTNG1	3942	3997	1	-28.9	1	0.00525994	0.515	0	0	-4.17062	15	18	8	3UTR		0	0
hsa-miR-1468-5p	XM_011541021	NTNG1	3968	3987	1	-21.3	0	0.00023772	0.529	0	0	-9.29912	16	19	10	3UTR		0	0
hsa-miR-1301-5p	XM_011541021	NTNG1	5688	5704	1	-23.7	1	0.000709122	0.485	0	0	-7.61919	15	16	15	3UTR		0	0
hsa-miR-1185-2-3p	XM_011541021	NTNG1	2949	2968	1	-21.5	1	0.0681694	0.471	0	0	-8.57351	15	19	11	3UTR		0	0
hsa-miR-449c-3p	XM_011541021	NTNG1	3973	3998	1	-24.4	0	0.0091854	0.529	0	0	-10.3856	20	25	11	3UTR		0	0
[truncated: 2,599 more rows]
