# Supplementary material for: The pan-cancer landscape of netrin family reveals potential oncogenic biomarkers
Source: Sci Rep. 2020 Mar 23;10:5224. doi: 10.1038/s41598-020-62117-5 (PMC7090012; doi:10.1038/s41598-020-62117-5)
Supplement: Supplementary file 9 — Dataset 9. [file 41598_2020_62117_MOESM9_ESM.xlsx]

## Sheet: Title Page
The pan-cancer landscape of netrin family reveals potential oncogenic biomarkers
Wenjun Hao1,8, Meng Yu2,8, Jiaxing Lin3, Bitian Liu4, Haotian Xing3, Jieping Yang3, Dan Sun3, Feilong Chen3, Mingzhe Jiang3, Chaozhi Tang3, Xizhe Zhang5,6, Yongkang Zhao6,7 and Yuyan Zhu3,7*
1.Department of Urology, The First Affiliated Hospital of Dalian Medical University, Dalian 116011, China
2.Department of Reproductive Biology and Transgenic Animal, China Medical University, Shenyang 110001, China
3.Department of Urology, The First Affiliated Hospital of China Medical University, Shenyang 110001, China
4.Department of Urology, The Second Affiliated Hospital of China Medical University, Shenyang 110001, China
5.School of Computer Science and Engineering, Northeastern University, Shenyang, Liaoning, China
6.National Institute of Health and Medical Big Data, China Medical University, Shenyang, Liaoning, China
7.Joint Laboratory of Artificial Intelligence and Precision Medicine of China Medical University and Northeastern University, Northeastern University, Shenyang, Liaoning, China
8.These authors contributed equally
* Corresponding author: Yuyan Zhu, e-mail: yyzhu@cmu.edu.cn

## Sheet: NTN1
miRNAid	miRNAname	geneID	geneName	geneType	chromosome	narrowStart	narrowEnd	broadStart	broadEnd	strand	clipExpNum	degraExpNum	RBP	PITA	RNA22	miRmap	microT	miRanda	PicTar	TargetScan	pancancerNum
MIMAT0000062	hsa-let-7a-5p	ENSG00000065320	NTN1	protein_coding	chr17	9143548	9143554	9143548	9143555	+	1	0	AGO2	1	0	0	0	0	0	1	5
MIMAT0000063	hsa-let-7b-5p	ENSG00000065320	NTN1	protein_coding	chr17	9143548	9143554	9143548	9143555	+	1	0	AGO2	1	0	0	0	0	0	1	3
MIMAT0000064	hsa-let-7c-5p	ENSG00000065320	NTN1	protein_coding	chr17	9143548	9143554	9143548	9143555	+	1	0	AGO2	1	0	0	0	0	0	1	1
MIMAT0000065	hsa-let-7d-5p	ENSG00000065320	NTN1	protein_coding	chr17	9143548	9143554	9143548	9143555	+	1	0	AGO2	1	0	0	0	0	0	1	11
MIMAT0000066	hsa-let-7e-5p	ENSG00000065320	NTN1	protein_coding	chr17	9143548	9143554	9143548	9143555	+	1	0	AGO2	1	0	0	0	0	0	1	3
MIMAT0000067	hsa-let-7f-5p	ENSG00000065320	NTN1	protein_coding	chr17	9143548	9143554	9143548	9143555	+	1	0	AGO2	1	0	0	0	0	0	1	4
MIMAT0000068	hsa-miR-15a-5p	ENSG00000065320	NTN1	protein_coding	chr17	9144900	9144905	9144900	9144905	+	2	0	AGO2	1	0	0	0	0	0	0	10
MIMAT0000069	hsa-miR-16-5p	ENSG00000065320	NTN1	protein_coding	chr17	9144900	9144905	9144900	9144905	+	2	0	AGO2	1	0	0	0	0	0	0	13
MIMAT0000072	hsa-miR-18a-5p	ENSG00000065320	NTN1	protein_coding	chr17	9144601	9144606	9144601	9144606	+	2	0	AGO1-4	1	0	0	0	0	0	0	16
MIMAT0000080	hsa-miR-24-3p	ENSG00000065320	NTN1	protein_coding	chr17	9144466	9144472	9144466	9144472	+	1	0	AGO1-4	1	0	0	0	0	0	0	8
MIMAT0000085	hsa-miR-28-5p	ENSG00000065320	NTN1	protein_coding	chr17	9143558	9143565	9143558	9143565	+	1	0	AGO2	1	0	0	0	0	0	0	3
MIMAT0000085	hsa-miR-28-5p	ENSG00000065320	NTN1	protein_coding	chr17	9143907	9143913	9143907	9143913	+	1	0	AGO1	1	0	0	0	0	0	0	3
MIMAT0000091	hsa-miR-33a-5p	ENSG00000065320	NTN1	protein_coding	chr17	9147116	9147122	9147095	9147123	+	3	0	AGO1,AGO2	1	0	0	1	1	0	1	13
MIMAT0000096	hsa-miR-98-5p	ENSG00000065320	NTN1	protein_coding	chr17	9143548	9143554	9143548	9143555	+	1	0	AGO2	1	0	0	0	0	0	1	10
MIMAT0000101	hsa-miR-103a-3p	ENSG00000065320	NTN1	protein_coding	chr17	9145120	9145126	9145120	9145126	+	1	0	AGO1	1	0	0	0	0	0	0	10
MIMAT0000104	hsa-miR-107	ENSG00000065320	NTN1	protein_coding	chr17	9145120	9145126	9145120	9145126	+	1	0	AGO1	1	0	0	0	0	0	0	10
MIMAT0000222	hsa-miR-192-5p	ENSG00000065320	NTN1	protein_coding	chr17	9145115	9145120	9145115	9145120	+	1	0	AGO1	1	0	0	0	0	0	0	15
MIMAT0000226	hsa-miR-196a-5p	ENSG00000065320	NTN1	protein_coding	chr17	9143546	9143553	9143546	9143553	+	1	0	AGO2	1	0	0	0	0	0	0	8
MIMAT0000231	hsa-miR-199a-5p	ENSG00000065320	NTN1	protein_coding	chr17	9145304	9145310	9145304	9145310	+	2	0	AGO2	1	0	0	0	0	0	0	1
MIMAT0000255	hsa-miR-34a-5p	ENSG00000065320	NTN1	protein_coding	chr17	9145290	9145295	9145290	9145295	+	2	0	AGO2	1	0	0	0	0	0	0	11
MIMAT0000262	hsa-miR-187-3p	ENSG00000065320	NTN1	protein_coding	chr17	9144688	9144694	9144688	9144694	+	1	0	AGO1-4	1	0	0	0	0	0	0	4
MIMAT0000263	hsa-miR-199b-5p	ENSG00000065320	NTN1	protein_coding	chr17	9145304	9145310	9145304	9145310	+	2	0	AGO2	1	0	0	0	0	0	0	1
MIMAT0000265	hsa-miR-204-5p	ENSG00000065320	NTN1	protein_coding	chr17	9144539	9144544	9144539	9144544	+	2	0	AGO1-4	1	0	0	0	0	0	0	4
MIMAT0000268	hsa-miR-211-5p	ENSG00000065320	NTN1	protein_coding	chr17	9144539	9144544	9144539	9144544	+	2	0	AGO1-4	1	0	0	0	0	0	0	8
MIMAT0000271	hsa-miR-214-3p	ENSG00000065320	NTN1	protein_coding	chr17	9143935	9143963	9143935	9143963	+	1	0	AGO1	0	0	0	1	0	0	0	1
MIMAT0000271	hsa-miR-214-3p	ENSG00000065320	NTN1	protein_coding	chr17	9144984	9145012	9144984	9145012	+	1	0	AGO2	0	0	0	1	0	0	0	1
MIMAT0000271	hsa-miR-214-3p	ENSG00000065320	NTN1	protein_coding	chr17	9146479	9146485	9146458	9146486	+	2	0	AGO2	1	0	1	1	0	0	0	1
MIMAT0000272	hsa-miR-215-5p	ENSG00000065320	NTN1	protein_coding	chr17	9145115	9145120	9145115	9145120	+	1	0	AGO1	1	0	0	0	0	0	0	9
MIMAT0000414	hsa-let-7g-5p	ENSG00000065320	NTN1	protein_coding	chr17	9143548	9143554	9143548	9143555	+	1	0	AGO2	1	0	0	0	0	0	1	11
MIMAT0000415	hsa-let-7i-5p	ENSG00000065320	NTN1	protein_coding	chr17	9143548	9143554	9143548	9143555	+	1	0	AGO2	1	0	0	0	0	0	1	3
MIMAT0000417	hsa-miR-15b-5p	ENSG00000065320	NTN1	protein_coding	chr17	9144900	9144905	9144900	9144905	+	2	0	AGO2	1	0	0	0	0	0	0	13
MIMAT0000421	hsa-miR-122-5p	ENSG00000065320	NTN1	protein_coding	chr17	9145200	9145205	9145200	9145205	+	1	0	AGO1-4	1	0	1	0	0	0	0	5
MIMAT0000422	hsa-miR-124-3p	ENSG00000065320	NTN1	protein_coding	chr17	9144610	9144617	9144610	9144617	+	2	0	AGO1-4	1	0	0	0	0	0	0	2
MIMAT0000424	hsa-miR-128-3p	ENSG00000065320	NTN1	protein_coding	chr17	9144653	9144659	9144653	9144659	+	2	0	AGO1-4	1	0	0	0	0	0	0	11
MIMAT0000425	hsa-miR-130a-3p	ENSG00000065320	NTN1	protein_coding	chr17	9145198	9145203	9145198	9145203	+	1	0	AGO1-4	1	0	0	0	0	0	0	6
MIMAT0000428	hsa-miR-135a-5p	ENSG00000065320	NTN1	protein_coding	chr17	9144469	9144474	9144469	9144474	+	1	0	AGO1-4	1	0	0	0	0	0	0	6
MIMAT0000430	hsa-miR-138-5p	ENSG00000065320	NTN1	protein_coding	chr17	9145083	9145089	9145067	9145090	+	3	0	AGO2	1	0	0	0	1	0	0	8
MIMAT0000437	hsa-miR-145-5p	ENSG00000065320	NTN1	protein_coding	chr17	9145094	9145101	9145094	9145101	+	1	0	AGO1	1	0	0	0	0	0	0	1
MIMAT0000450	hsa-miR-149-5p	ENSG00000065320	NTN1	protein_coding	chr17	9143918	9143923	9143918	9143923	+	1	0	AGO1	1	0	0	0	0	0	0	3
MIMAT0000461	hsa-miR-195-5p	ENSG00000065320	NTN1	protein_coding	chr17	9144900	9144905	9144900	9144905	+	2	0	AGO2	1	0	0	0	0	0	0	2
MIMAT0000685	hsa-miR-34b-5p	ENSG00000065320	NTN1	protein_coding	chr17	9145290	9145296	9145290	9145296	+	2	0	AGO2	0	0	1	0	0	0	0	1
MIMAT0000686	hsa-miR-34c-5p	ENSG00000065320	NTN1	protein_coding	chr17	9145290	9145295	9145290	9145295	+	2	0	AGO2	1	0	0	0	0	0	0	3
MIMAT0000687	hsa-miR-299-3p	ENSG00000065320	NTN1	protein_coding	chr17	9144966	9144972	9144966	9144972	+	2	0	AGO1,AGO2	1	0	1	0	0	0	0	4
MIMAT0000687	hsa-miR-299-3p	ENSG00000065320	NTN1	protein_coding	chr17	9145028	9145034	9145028	9145034	+	2	0	AGO2	1	0	1	0	0	0	0	4
MIMAT0000688	hsa-miR-301a-3p	ENSG00000065320	NTN1	protein_coding	chr17	9145198	9145203	9145198	9145203	+	1	0	AGO1-4	1	0	0	0	0	0	0	13
MIMAT0000691	hsa-miR-130b-3p	ENSG00000065320	NTN1	protein_coding	chr17	9145198	9145203	9145198	9145203	+	1	0	AGO1-4	1	0	0	0	0	0	0	10
MIMAT0000721	hsa-miR-369-3p	ENSG00000065320	NTN1	protein_coding	chr17	9147131	9147136	9147109	9147146	+	3	0	AGO1,AGO2	1	0	0	2	0	0	0	7
MIMAT0000721	hsa-miR-369-3p	ENSG00000065320	NTN1	protein_coding	chr17	9147140	9147145	9147140	9147145	+	1	0	AGO2	1	0	0	0	0	0	0	7
MIMAT0000722	hsa-miR-370-3p	ENSG00000065320	NTN1	protein_coding	chr17	9144702	9144707	9144702	9144707	+	1	0	AGO1-4	1	0	0	0	0	0	0	3
MIMAT0000722	hsa-miR-370-3p	ENSG00000065320	NTN1	protein_coding	chr17	9146521	9146526	9146521	9146526	+	2	0	AGO2	1	0	0	0	0	0	0	3
MIMAT0000727	hsa-miR-374a-5p	ENSG00000065320	NTN1	protein_coding	chr17	9147140	9147146	9147119	9147147	+	3	0	AGO1,AGO2	1	0	0	1	1	0	1	4
MIMAT0000732	hsa-miR-378a-3p	ENSG00000065320	NTN1	protein_coding	chr17	9143914	9143919	9143914	9143919	+	1	0	AGO1	1	0	0	0	0	0	0	12
MIMAT0000752	hsa-miR-328-3p	ENSG00000065320	NTN1	protein_coding	chr17	9144509	9144516	9144509	9144516	+	2	0	AGO1-4	1	0	0	0	0	0	0	7
MIMAT0000752	hsa-miR-328-3p	ENSG00000065320	NTN1	protein_coding	chr17	9144595	9144600	9144595	9144600	+	2	0	AGO1-4	1	0	0	0	0	0	0	7
MIMAT0000752	hsa-miR-328-3p	ENSG00000065320	NTN1	protein_coding	chr17	9145179	9145184	9145179	9145184	+	1	0	AGO1-4	1	0	0	0	0	0	0	7
MIMAT0000756	hsa-miR-326	ENSG00000065320	NTN1	protein_coding	chr17	9143567	9143572	9143545	9143573	+	1	0	AGO2	1	0	1	1	0	0	0	7
MIMAT0000756	hsa-miR-326	ENSG00000065320	NTN1	protein_coding	chr17	9144435	9144463	9144435	9144463	+	1	0	AGO1-4	0	0	0	1	0	0	0	7
MIMAT0000756	hsa-miR-326	ENSG00000065320	NTN1	protein_coding	chr17	9145156	9145161	9145134	9145162	+	2	0	AGO1,AGO1-4	1	0	1	1	0	0	0	7
MIMAT0000756	hsa-miR-326	ENSG00000065320	NTN1	protein_coding	chr17	9146798	9146826	9146798	9146826	+	1	0	AGO2	0	0	0	1	0	0	0	7
MIMAT0000758	hsa-miR-135b-5p	ENSG00000065320	NTN1	protein_coding	chr17	9144469	9144474	9144469	9144474	+	1	0	AGO1-4	1	0	0	0	0	0	0	13
MIMAT0000760	hsa-miR-331-3p	ENSG00000065320	NTN1	protein_coding	chr17	9144482	9144487	9144460	9144488	+	1	0	AGO1-4	1	0	0	1	0	0	0	13
MIMAT0000760	hsa-miR-331-3p	ENSG00000065320	NTN1	protein_coding	chr17	9145175	9145181	9145154	9145182	+	1	0	AGO1-4	1	0	0	1	0	0	0	13
MIMAT0000760	hsa-miR-331-3p	ENSG00000065320	NTN1	protein_coding	chr17	9146522	9146550	9146522	9146550	+	2	0	AGO2	0	0	0	1	0	0	0	13
MIMAT0000762	hsa-miR-324-3p	ENSG00000065320	NTN1	protein_coding	chr17	9144479	9144484	9144479	9144484	+	1	0	AGO1-4	1	0	0	0	0	0	0	7
MIMAT0000763	hsa-miR-338-3p	ENSG00000065320	NTN1	protein_coding	chr17	9144525	9144531	9144525	9144531	+	2	0	AGO1-4	1	0	1	0	0	0	0	6
MIMAT0000763	hsa-miR-338-3p	ENSG00000065320	NTN1	protein_coding	chr17	9146481	9146486	9146481	9146486	+	2	0	AGO2	1	0	1	0	0	0	0	6
MIMAT0000764	hsa-miR-339-5p	ENSG00000065320	NTN1	protein_coding	chr17	9145067	9145073	9145066	9145073	+	2	0	AGO2	1	0	1	0	0	0	0	14
MIMAT0000765	hsa-miR-335-5p	ENSG00000065320	NTN1	protein_coding	chr17	9145295	9145300	9145295	9145300	+	2	0	AGO2	1	0	0	0	0	0	0	9
MIMAT0000765	hsa-miR-335-5p	ENSG00000065320	NTN1	protein_coding	chr17	9147305	9147310	9147305	9147310	+	1	0	AGO2	1	0	0	0	0	0	0	9
MIMAT0001080	hsa-miR-196b-5p	ENSG00000065320	NTN1	protein_coding	chr17	9143546	9143553	9143546	9143553	+	1	0	AGO2	1	0	0	0	0	0	0	9
MIMAT0001339	hsa-miR-422a	ENSG00000065320	NTN1	protein_coding	chr17	9143914	9143919	9143914	9143919	+	1	0	AGO1	1	0	0	0	0	0	0	1
MIMAT0001341	hsa-miR-424-5p	ENSG00000065320	NTN1	protein_coding	chr17	9144900	9144905	9144900	9144905	+	2	0	AGO2	1	0	0	0	0	0	0	9
MIMAT0001412	hsa-miR-18b-5p	ENSG00000065320	NTN1	protein_coding	chr17	9144601	9144606	9144601	9144606	+	2	0	AGO1-4	1	0	0	0	0	0	0	4
MIMAT0001541	hsa-miR-449a	ENSG00000065320	NTN1	protein_coding	chr17	9145290	9145295	9145290	9145295	+	2	0	AGO2	1	0	0	0	0	0	0	7
MIMAT0001627	hsa-miR-433-3p	ENSG00000065320	NTN1	protein_coding	chr17	9145050	9145055	9145050	9145055	+	2	0	AGO2	1	0	0	0	0	0	0	3
MIMAT0001629	hsa-miR-329-3p	ENSG00000065320	NTN1	protein_coding	chr17	9145042	9145047	9145042	9145047	+	2	0	AGO2	1	0	0	0	0	0	0	3
MIMAT0002171	hsa-miR-410-3p	ENSG00000065320	NTN1	protein_coding	chr17	9147142	9147147	9147120	9147158	+	3	0	AGO1,AGO2	1	0	0	2	0	1	1	4
MIMAT0002173	hsa-miR-483-3p	ENSG00000065320	NTN1	protein_coding	chr17	9143896	9143903	9143896	9143903	+	1	0	AGO1	1	0	0	0	0	0	0	1
MIMAT0002176	hsa-miR-485-3p	ENSG00000065320	NTN1	protein_coding	chr17	9144923	9144928	9144923	9144928	+	2	0	AGO2	1	0	0	0	0	0	0	4
MIMAT0002806	hsa-miR-490-3p	ENSG00000065320	NTN1	protein_coding	chr17	9144499	9144505	9144499	9144505	+	1	0	AGO1-4	1	0	1	0	0	0	0	1
MIMAT0002807	hsa-miR-491-5p	ENSG00000065320	NTN1	protein_coding	chr17	9144964	9144970	9144963	9144970	+	2	0	AGO1,AGO2	1	0	1	0	0	0	0	4
MIMAT0002814	hsa-miR-432-5p	ENSG00000065320	NTN1	protein_coding	chr17	9144535	9144541	9144535	9144541	+	2	0	AGO1-4	1	0	1	0	0	0	0	3
MIMAT0002820	hsa-miR-497-5p	ENSG00000065320	NTN1	protein_coding	chr17	9144900	9144905	9144900	9144905	+	2	0	AGO2	1	0	0	0	0	0	0	2
MIMAT0002824	hsa-miR-498	ENSG00000065320	NTN1	protein_coding	chr17	9146812	9146817	9146812	9146817	+	1	0	AGO2	1	0	0	0	0	0	0	4
MIMAT0002826	hsa-miR-515-5p	ENSG00000065320	NTN1	protein_coding	chr17	9145320	9145325	9145320	9145325	+	2	0	AGO2	1	0	0	0	0	0	0	5
MIMAT0002839	hsa-miR-525-3p	ENSG00000065320	NTN1	protein_coding	chr17	9144959	9144964	9144959	9144964	+	2	0	AGO1,AGO2	1	0	0	0	0	0	0	2
MIMAT0002850	hsa-miR-524-3p	ENSG00000065320	NTN1	protein_coding	chr17	9144959	9144964	9144959	9144964	+	2	0	AGO1,AGO2	1	0	0	0	0	0	0	5
MIMAT0002859	hsa-miR-516b-5p	ENSG00000065320	NTN1	protein_coding	chr17	9143564	9143571	9143564	9143571	+	1	0	AGO2	1	0	0	0	0	0	0	3
MIMAT0002859	hsa-miR-516b-5p	ENSG00000065320	NTN1	protein_coding	chr17	9144618	9144623	9144618	9144623	+	2	0	AGO1-4	1	0	0	0	0	0	0	3
MIMAT0002859	hsa-miR-516b-5p	ENSG00000065320	NTN1	protein_coding	chr17	9145154	9145160	9145154	9145160	+	1	0	AGO1-4	1	0	0	0	0	0	0	3
MIMAT0002874	hsa-miR-503-5p	ENSG00000065320	NTN1	protein_coding	chr17	9144900	9144905	9144900	9144905	+	2	0	AGO2	1	0	0	0	0	0	0	11
MIMAT0002878	hsa-miR-506-3p	ENSG00000065320	NTN1	protein_coding	chr17	9144611	9144617	9144611	9144617	+	2	0	AGO1-4	1	0	0	0	0	0	0	6
MIMAT0002881	hsa-miR-509-3p	ENSG00000065320	NTN1	protein_coding	chr17	9145225	9145230	9145225	9145230	+	1	0	AGO1-4	1	0	0	0	0	0	0	6
MIMAT0002883	hsa-miR-514a-3p	ENSG00000065320	NTN1	protein_coding	chr17	9146789	9146794	9146789	9146794	+	1	0	AGO2	1	0	0	0	0	0	0	4
MIMAT0003289	hsa-miR-620	ENSG00000065320	NTN1	protein_coding	chr17	9143942	9143949	9143942	9143949	+	1	0	AGO1	1	0	0	0	0	0	0	0
MIMAT0003289	hsa-miR-620	ENSG00000065320	NTN1	protein_coding	chr17	9144534	9144539	9144534	9144539	+	2	0	AGO1-4	1	0	0	0	0	0	0	0
MIMAT0003296	hsa-miR-627-5p	ENSG00000065320	NTN1	protein_coding	chr17	9145071	9145078	9145071	9145078	+	3	0	AGO2	1	0	0	0	0	0	0	11
MIMAT0003301	hsa-miR-33b-5p	ENSG00000065320	NTN1	protein_coding	chr17	9147116	9147122	9147095	9147123	+	3	0	AGO1,AGO2	1	0	0	1	1	0	1	14
MIMAT0003311	hsa-miR-641	ENSG00000065320	NTN1	protein_coding	chr17	9144578	9144583	9144578	9144583	+	2	0	AGO1-4	1	0	0	0	0	0	0	4
MIMAT0003326	hsa-miR-663a	ENSG00000065320	NTN1	protein_coding	chr17	9145220	9145225	9145220	9145225	+	1	0	AGO1-4	1	0	0	0	0	0	0	1
MIMAT0003327	hsa-miR-449b-5p	ENSG00000065320	NTN1	protein_coding	chr17	9145290	9145295	9145290	9145295	+	2	0	AGO2	1	0	0	0	0	0	0	3
MIMAT0003328	hsa-miR-653-5p	ENSG00000065320	NTN1	protein_coding	chr17	9146791	9146796	9146791	9146796	+	1	0	AGO2	1	0	0	0	0	0	0	5
MIMAT0003332	hsa-miR-656-3p	ENSG00000065320	NTN1	protein_coding	chr17	9147126	9147131	9147126	9147131	+	2	0	AGO1,AGO2	1	0	0	0	0	0	0	5
MIMAT0003338	hsa-miR-660-5p	ENSG00000065320	NTN1	protein_coding	chr17	9144473	9144478	9144473	9144478	+	1	0	AGO1-4	1	0	0	0	0	0	0	7
MIMAT0003880	hsa-miR-671-5p	ENSG00000065320	NTN1	protein_coding	chr17	9144949	9144955	9144949	9144955	+	1	0	AGO2	1	0	1	0	0	0	0	13
MIMAT0003885	hsa-miR-454-3p	ENSG00000065320	NTN1	protein_coding	chr17	9145198	9145203	9145198	9145203	+	1	0	AGO1-4	1	0	0	0	0	0	0	10
MIMAT0003886	hsa-miR-769-5p	ENSG00000065320	NTN1	protein_coding	chr17	9146491	9146496	9146491	9146496	+	2	0	AGO2	1	0	0	0	0	0	0	13
MIMAT0004185	hsa-miR-802	ENSG00000065320	NTN1	protein_coding	chr17	9145287	9145292	9145287	9145292	+	2	0	AGO2	1	0	0	0	0	0	0	2
MIMAT0004597	hsa-miR-140-3p	ENSG00000065320	NTN1	protein_coding	chr17	9146487	9146493	9146487	9146493	+	2	0	AGO2	1	0	0	0	0	0	0	6
MIMAT0004605	hsa-miR-129-2-3p	ENSG00000065320	NTN1	protein_coding	chr17	9146459	9146464	9146459	9146464	+	2	0	AGO2	1	0	0	0	0	0	0	2
MIMAT0004679	hsa-miR-296-3p	ENSG00000065320	NTN1	protein_coding	chr17	9145056	9145062	9145056	9145062	+	2	0	AGO2	1	0	0	0	0	0	0	4
MIMAT0004682	hsa-miR-361-3p	ENSG00000065320	NTN1	protein_coding	chr17	9144506	9144513	9144506	9144513	+	2	0	AGO1-4	1	0	0	0	0	0	0	9
MIMAT0004683	hsa-miR-362-3p	ENSG00000065320	NTN1	protein_coding	chr17	9145042	9145047	9145042	9145047	+	2	0	AGO2	1	0	0	0	0	0	0	6
MIMAT0004693	hsa-miR-330-5p	ENSG00000065320	NTN1	protein_coding	chr17	9143567	9143572	9143545	9143578	+	1	0	AGO2	1	0	1	2	0	0	0	11
MIMAT0004693	hsa-miR-330-5p	ENSG00000065320	NTN1	protein_coding	chr17	9144435	9144463	9144435	9144463	+	1	0	AGO1-4	0	0	0	1	0	0	0	11
MIMAT0004693	hsa-miR-330-5p	ENSG00000065320	NTN1	protein_coding	chr17	9145156	9145161	9145134	9145162	+	2	0	AGO1,AGO1-4	1	0	1	1	0	0	0	11
MIMAT0004693	hsa-miR-330-5p	ENSG00000065320	NTN1	protein_coding	chr17	9146798	9146826	9146798	9146826	+	1	0	AGO2	0	0	0	1	0	0	0	11
MIMAT0004805	hsa-miR-616-3p	ENSG00000065320	NTN1	protein_coding	chr17	9144494	9144499	9144494	9144499	+	1	0	AGO1-4	1	0	0	0	0	0	0	6
MIMAT0004909	hsa-miR-450b-5p	ENSG00000065320	NTN1	protein_coding	chr17	9145124	9145129	9145124	9145129	+	1	0	AGO1	1	0	0	0	0	0	0	8
MIMAT0004911	hsa-miR-874-3p	ENSG00000065320	NTN1	protein_coding	chr17	9146523	9146529	9146523	9146529	+	2	0	AGO2	1	0	0	0	0	0	0	6
MIMAT0004921	hsa-miR-889-3p	ENSG00000065320	NTN1	protein_coding	chr17	9147130	9147135	9147130	9147135	+	1	0	AGO2	1	0	0	0	0	0	0	3
MIMAT0004926	hsa-miR-708-5p	ENSG00000065320	NTN1	protein_coding	chr17	9143560	9143565	9143560	9143565	+	1	0	AGO2	1	0	0	0	0	0	0	3
MIMAT0004926	hsa-miR-708-5p	ENSG00000065320	NTN1	protein_coding	chr17	9143907	9143913	9143907	9143913	+	1	0	AGO1	1	0	0	0	0	0	0	3
MIMAT0004952	hsa-miR-665	ENSG00000065320	NTN1	protein_coding	chr17	9144505	9144510	9144505	9144510	+	2	0	AGO1-4	1	0	0	0	0	0	0	2
MIMAT0004953	hsa-miR-873-5p	ENSG00000065320	NTN1	protein_coding	chr17	9144503	9144509	9144503	9144509	+	2	0	AGO1-4	1	0	0	0	0	0	0	5
MIMAT0004955	hsa-miR-374b-5p	ENSG00000065320	NTN1	protein_coding	chr17	9147140	9147146	9147119	9147147	+	3	0	AGO1,AGO2	1	0	0	1	1	1	1	4
MIMAT0004957	hsa-miR-760	ENSG00000065320	NTN1	protein_coding	chr17	9145156	9145163	9145156	9145163	+	1	0	AGO1-4	1	0	0	0	0	0	0	8
MIMAT0004958	hsa-miR-301b-3p	ENSG00000065320	NTN1	protein_coding	chr17	9145198	9145203	9145198	9145203	+	1	0	AGO1-4	1	0	0	0	0	0	0	5
MIMAT0005458	hsa-miR-1224-5p	ENSG00000065320	NTN1	protein_coding	chr17	9144695	9144701	9144695	9144701	+	1	0	AGO1-4	1	0	0	0	0	0	0	3
MIMAT0005797	hsa-miR-1301-3p	ENSG00000065320	NTN1	protein_coding	chr17	9145122	9145127	9145122	9145127	+	1	0	AGO1	1	0	0	0	0	0	0	11
MIMAT0005800	hsa-miR-1298-5p	ENSG00000065320	NTN1	protein_coding	chr17	9144493	9144498	9144493	9144498	+	1	0	AGO1-4	1	0	0	0	0	0	0	2
MIMAT0005878	hsa-miR-1287-5p	ENSG00000065320	NTN1	protein_coding	chr17	9143915	9143920	9143915	9143920	+	1	0	AGO1	1	0	0	0	0	0	0	7
MIMAT0005878	hsa-miR-1287-5p	ENSG00000065320	NTN1	protein_coding	chr17	9145203	9145208	9145203	9145208	+	1	0	AGO1-4	1	0	0	0	0	0	0	7
MIMAT0005884	hsa-miR-1294	ENSG00000065320	NTN1	protein_coding	chr17	9143550	9143556	9143550	9143556	+	1	0	AGO2	1	0	1	0	0	0	0	3
MIMAT0005884	hsa-miR-1294	ENSG00000065320	NTN1	protein_coding	chr17	9145192	9145197	9145192	9145197	+	1	0	AGO1-4	1	0	1	0	0	0	0	3
MIMAT0005903	hsa-miR-1251-5p	ENSG00000065320	NTN1	protein_coding	chr17	9144684	9144689	9144684	9144689	+	1	0	AGO1-4	1	0	0	0	0	0	0	8
MIMAT0005924	hsa-miR-1270	ENSG00000065320	NTN1	protein_coding	chr17	9143942	9143949	9143942	9143949	+	1	0	AGO1	1	0	0	0	0	0	0	3
MIMAT0005924	hsa-miR-1270	ENSG00000065320	NTN1	protein_coding	chr17	9144534	9144539	9144534	9144539	+	2	0	AGO1-4	1	0	0	0	0	0	0	3
MIMAT0005944	hsa-miR-1252-5p	ENSG00000065320	NTN1	protein_coding	chr17	9143562	9143567	9143562	9143567	+	1	0	AGO2	1	0	0	0	0	0	0	2
MIMAT0005944	hsa-miR-1252-5p	ENSG00000065320	NTN1	protein_coding	chr17	9144669	9144674	9144669	9144674	+	1	0	AGO1-4	1	0	0	0	0	0	0	2
MIMAT0005955	hsa-miR-1197	ENSG00000065320	NTN1	protein_coding	chr17	9146510	9146515	9146510	9146515	+	2	0	AGO2	1	0	1	0	0	0	0	3
MIMAT0010251	hsa-miR-449c-5p	ENSG00000065320	NTN1	protein_coding	chr17	9145290	9145296	9145290	9145296	+	2	0	AGO2	0	0	1	0	0	0	0	2
MIMAT0010357	hsa-miR-670-5p	ENSG00000065320	NTN1	protein_coding	chr17	9145069	9145074	9145069	9145074	+	3	0	AGO2	0	0	1	0	0	0	0	6
MIMAT0010364	hsa-miR-761	ENSG00000065320	NTN1	protein_coding	chr17	9143935	9143963	9143935	9143963	+	1	0	AGO1	0	0	0	1	0	0	0	0
MIMAT0010364	hsa-miR-761	ENSG00000065320	NTN1	protein_coding	chr17	9144984	9145012	9144984	9145012	+	1	0	AGO2	0	0	0	1	0	0	0	0
MIMAT0010364	hsa-miR-761	ENSG00000065320	NTN1	protein_coding	chr17	9146479	9146485	9146458	9146486	+	2	0	AGO2	0	0	1	1	0	0	0	0
MIMAT0011156	hsa-miR-2114-5p	ENSG00000065320	NTN1	protein_coding	chr17	9145070	9145076	9145070	9145076	+	3	0	AGO2	0	0	1	0	0	0	0	0
MIMAT0013517	hsa-miR-2682-5p	ENSG00000065320	NTN1	protein_coding	chr17	9145290	9145296	9145269	9145297	+	2	0	AGO2	0	0	1	1	0	0	0	3
MIMAT0017999	hsa-miR-3619-5p	ENSG00000065320	NTN1	protein_coding	chr17	9143935	9143963	9143935	9143963	+	1	0	AGO1	0	0	0	1	0	0	0	4
MIMAT0017999	hsa-miR-3619-5p	ENSG00000065320	NTN1	protein_coding	chr17	9144984	9145012	9144984	9145012	+	1	0	AGO2	0	0	0	1	0	0	0	4
MIMAT0017999	hsa-miR-3619-5p	ENSG00000065320	NTN1	protein_coding	chr17	9146479	9146485	9146458	9146486	+	2	0	AGO2	0	0	1	1	0	0	0	4
MIMAT0018108	hsa-miR-3681-5p	ENSG00000065320	NTN1	protein_coding	chr17	9144641	9144657	9144641	9144657	+	2	0	AGO1-4	0	1	0	0	0	0	0	1
MIMAT0018192	hsa-miR-3918	ENSG00000065320	NTN1	protein_coding	chr17	9145280	9145286	9145280	9145286	+	2	0	AGO2	0	0	1	0	0	0	0	2
MIMAT0018943	hsa-miR-4428	ENSG00000065320	NTN1	protein_coding	chr17	9144649	9144674	9144649	9144674	+	2	0	AGO1-4	0	1	0	0	0	0	0	4
MIMAT0018980	hsa-miR-4458	ENSG00000065320	NTN1	protein_coding	chr17	9143548	9143555	9143548	9143555	+	1	0	AGO2	0	0	0	0	0	0	1	1
MIMAT0019036	hsa-miR-4500	ENSG00000065320	NTN1	protein_coding	chr17	9143548	9143555	9143548	9143555	+	1	0	AGO2	0	0	0	0	0	0	1	0
MIMAT0019699	hsa-miR-4640-5p	ENSG00000065320	NTN1	protein_coding	chr17	9145187	9145193	9145187	9145193	+	1	0	AGO1-4	0	0	1	0	0	0	0	5
MIMAT0019845	hsa-miR-4726-5p	ENSG00000065320	NTN1	protein_coding	chr17	9145187	9145193	9145187	9145193	+	1	0	AGO1-4	0	0	1	0	0	0	0	2
MIMAT0019853	hsa-miR-4731-5p	ENSG00000065320	NTN1	protein_coding	chr17	9144646	9144667	9144646	9144667	+	2	0	AGO1-4	0	1	0	0	0	0	0	0
MIMAT0019864	hsa-miR-3064-5p	ENSG00000065320	NTN1	protein_coding	chr17	9143917	9143923	9143917	9143923	+	1	0	AGO1	0	0	1	0	0	0	0	2
MIMAT0019909	hsa-miR-4761-3p	ENSG00000065320	NTN1	protein_coding	chr17	9144632	9144652	9144632	9144652	+	2	0	AGO1-4	0	1	0	0	0	0	0	2
MIMAT0019953	hsa-miR-2467-3p	ENSG00000065320	NTN1	protein_coding	chr17	9145208	9145213	9145208	9145213	+	1	0	AGO1-4	0	0	1	0	0	0	0	1
MIMAT0019953	hsa-miR-2467-3p	ENSG00000065320	NTN1	protein_coding	chr17	9146494	9146499	9146494	9146499	+	2	0	AGO2	0	0	1	0	0	0	0	1
MIMAT0022702	hsa-miR-514a-5p	ENSG00000065320	NTN1	protein_coding	chr17	9144457	9144463	9144457	9144463	+	1	0	AGO1-4	0	0	1	0	0	0	0	3
MIMAT0022724	hsa-miR-1277-5p	ENSG00000065320	NTN1	protein_coding	chr17	9147131	9147134	9147107	9147159	+	3	0	AGO1,AGO2	0	0	1	2	0	0	0	0
MIMAT0025464	hsa-miR-6504-5p	ENSG00000065320	NTN1	protein_coding	chr17	9143917	9143923	9143917	9143923	+	1	0	AGO1	0	0	1	0	0	0	0	1

## Sheet: NTN4
miRNAid	miRNAname	geneID	geneName	geneType	chromosome	narrowStart	narrowEnd	broadStart	broadEnd	strand	clipExpNum	degraExpNum	RBP	PITA	RNA22	miRmap	microT	miRanda	PicTar	TargetScan	pancancerNum
MIMAT0000062	hsa-let-7a-5p	ENSG00000074527	NTN4	protein_coding	chr12	96052553	96052558	96052553	96052558	-	5	0	AGO1-4,AGO2	1	0	0	0	0	0	0	4
MIMAT0000063	hsa-let-7b-5p	ENSG00000074527	NTN4	protein_coding	chr12	96052553	96052558	96052553	96052558	-	5	0	AGO1-4,AGO2	1	0	0	0	0	0	0	4
MIMAT0000064	hsa-let-7c-5p	ENSG00000074527	NTN4	protein_coding	chr12	96052553	96052558	96052553	96052558	-	5	0	AGO1-4,AGO2	1	0	0	0	0	0	0	2
MIMAT0000065	hsa-let-7d-5p	ENSG00000074527	NTN4	protein_coding	chr12	96052553	96052558	96052553	96052558	-	5	0	AGO1-4,AGO2	1	0	0	0	0	0	0	10
MIMAT0000066	hsa-let-7e-5p	ENSG00000074527	NTN4	protein_coding	chr12	96052553	96052558	96052553	96052558	-	5	0	AGO1-4,AGO2	1	0	0	0	0	0	0	5
MIMAT0000067	hsa-let-7f-5p	ENSG00000074527	NTN4	protein_coding	chr12	96052553	96052558	96052553	96052558	-	5	0	AGO1-4,AGO2	1	0	0	0	0	0	0	3
MIMAT0000070	hsa-miR-17-5p	ENSG00000074527	NTN4	protein_coding	chr12	96052343	96052349	96052342	96052362	-	8	0	AGO1-4,AGO2	1	0	1	0	1	1	1	20
MIMAT0000075	hsa-miR-20a-5p	ENSG00000074527	NTN4	protein_coding	chr12	96052343	96052349	96052342	96052370	-	8	0	AGO1-4,AGO2	1	0	1	1	1	1	1	19
MIMAT0000078	hsa-miR-23a-3p	ENSG00000074527	NTN4	protein_coding	chr12	96051817	96051822	96051817	96051822	-	3	0	AGO1-4,AGO2	1	0	0	0	0	0	0	6
MIMAT0000081	hsa-miR-25-3p	ENSG00000074527	NTN4	protein_coding	chr12	96051972	96051977	96051972	96051977	-	5	0	AGO1,AGO1-4,AGO2	1	0	0	0	0	0	0	16
MIMAT0000082	hsa-miR-26a-5p	ENSG00000074527	NTN4	protein_coding	chr12	96051734	96051740	96051733	96051761	-	6	0	AGO1-4,AGO2	1	0	0	1	1	1	1	2
MIMAT0000083	hsa-miR-26b-5p	ENSG00000074527	NTN4	protein_coding	chr12	96051734	96051740	96051733	96051761	-	6	0	AGO1-4,AGO2	1	0	0	1	1	1	1	7
MIMAT0000090	hsa-miR-32-5p	ENSG00000074527	NTN4	protein_coding	chr12	96051972	96051977	96051972	96051977	-	5	0	AGO1,AGO1-4,AGO2	1	0	0	0	0	0	0	10
MIMAT0000091	hsa-miR-33a-5p	ENSG00000074527	NTN4	protein_coding	chr12	96051969	96051975	96051968	96051996	-	5	0	AGO1,AGO1-4,AGO2	1	0	1	1	1	0	0	20
MIMAT0000091	hsa-miR-33a-5p	ENSG00000074527	NTN4	protein_coding	chr12	96052736	96052741	96052735	96052763	-	4	0	AGO1-4,AGO2	1	0	1	1	0	0	0	20
MIMAT0000091	hsa-miR-33a-5p	ENSG00000074527	NTN4	protein_coding	chr12	96131693	96131721	96131693	96131721	-	3	0	AGO1-4,AGO2	0	0	0	1	0	0	0	20
MIMAT0000092	hsa-miR-92a-3p	ENSG00000074527	NTN4	protein_coding	chr12	96051972	96051977	96051972	96051977	-	5	0	AGO1,AGO1-4,AGO2	1	0	0	0	0	0	0	22
MIMAT0000093	hsa-miR-93-5p	ENSG00000074527	NTN4	protein_coding	chr12	96052343	96052349	96052342	96052362	-	8	0	AGO1-4,AGO2	1	0	1	0	1	1	1	18
MIMAT0000095	hsa-miR-96-5p	ENSG00000074527	NTN4	protein_coding	chr12	96052760	96052766	96052759	96052787	-	3	0	AGO1-4	1	0	1	1	1	1	1	12
MIMAT0000095	hsa-miR-96-5p	ENSG00000074527	NTN4	protein_coding	chr12	96131866	96131894	96131866	96131894	-	6	0	AGO1-4	0	0	0	1	0	0	0	12
MIMAT0000096	hsa-miR-98-5p	ENSG00000074527	NTN4	protein_coding	chr12	96052553	96052558	96052553	96052558	-	5	0	AGO1-4,AGO2	1	0	0	0	0	0	0	12
MIMAT0000102	hsa-miR-105-5p	ENSG00000074527	NTN4	protein_coding	chr12	96051976	96051981	96051976	96051981	-	3	0	AGO1-4,AGO2	1	0	0	0	0	0	0	8
MIMAT0000103	hsa-miR-106a-5p	ENSG00000074527	NTN4	protein_coding	chr12	96052343	96052349	96052342	96052370	-	8	0	AGO1-4,AGO2	1	0	1	1	1	1	1	15
MIMAT0000226	hsa-miR-196a-5p	ENSG00000074527	NTN4	protein_coding	chr12	96052336	96052342	96052335	96052363	-	8	0	AGO1-4,AGO2	1	0	1	1	1	0	0	7
MIMAT0000227	hsa-miR-197-3p	ENSG00000074527	NTN4	protein_coding	chr12	96052309	96052314	96052309	96052314	-	6	0	AGO1-4,AGO2	1	0	0	0	0	0	0	13
MIMAT0000232	hsa-miR-199a-3p	ENSG00000074527	NTN4	protein_coding	chr12	96052266	96052271	96052265	96052271	-	4	0	AGO1-4,AGO2	1	0	0	0	0	1	0	3
MIMAT0000241	hsa-miR-208a-3p	ENSG00000074527	NTN4	protein_coding	chr12	96052727	96052732	96052727	96052732	-	3	0	AGO1-4,AGO2	1	0	0	0	0	0	0	2
MIMAT0000242	hsa-miR-129-5p	ENSG00000074527	NTN4	protein_coding	chr12	96051807	96051812	96051806	96051826	-	4	0	AGO1-4,AGO2	1	0	0	0	1	0	0	8
MIMAT0000242	hsa-miR-129-5p	ENSG00000074527	NTN4	protein_coding	chr12	96051950	96051955	96051949	96051969	-	5	0	AGO1,AGO1-4,AGO2	1	0	0	0	1	0	0	8
MIMAT0000243	hsa-miR-148a-3p	ENSG00000074527	NTN4	protein_coding	chr12	96052252	96052257	96052252	96052257	-	4	0	AGO1-4,AGO2	1	0	0	0	0	0	0	5
MIMAT0000250	hsa-miR-139-5p	ENSG00000074527	NTN4	protein_coding	chr12	96052398	96052403	96052398	96052403	-	5	0	AGO1-4,AGO2	1	0	0	0	0	0	0	3
MIMAT0000255	hsa-miR-34a-5p	ENSG00000074527	NTN4	protein_coding	chr12	96052250	96052256	96052249	96052267	-	4	0	AGO1-4,AGO2	1	0	1	0	1	0	0	7
MIMAT0000255	hsa-miR-34a-5p	ENSG00000074527	NTN4	protein_coding	chr12	96107067	96107091	96107067	96107091	-	1	0	AGO1-4	0	1	0	0	0	0	0	7
MIMAT0000259	hsa-miR-182-5p	ENSG00000074527	NTN4	protein_coding	chr12	96052760	96052765	96052759	96052787	-	3	0	AGO1-4	1	0	0	1	1	1	1	10
MIMAT0000259	hsa-miR-182-5p	ENSG00000074527	NTN4	protein_coding	chr12	96131866	96131894	96131866	96131894	-	6	0	AGO1-4	0	0	0	1	0	0	0	10
MIMAT0000261	hsa-miR-183-5p	ENSG00000074527	NTN4	protein_coding	chr12	96051707	96051713	96051706	96051734	-	6	0	AGO1-4,AGO2	1	0	1	1	1	0	1	12
MIMAT0000271	hsa-miR-214-3p	ENSG00000074527	NTN4	protein_coding	chr12	96052303	96052308	96052303	96052308	-	6	0	AGO1-4,AGO2	1	0	0	0	0	0	0	3
MIMAT0000318	hsa-miR-200b-3p	ENSG00000074527	NTN4	protein_coding	chr12	96051907	96051912	96051906	96051926	-	5	0	AGO1-4,AGO2	1	0	0	0	1	0	0	6
MIMAT0000318	hsa-miR-200b-3p	ENSG00000074527	NTN4	protein_coding	chr12	96052362	96052367	96052362	96052367	-	8	0	AGO1-4,AGO2	1	0	0	0	0	0	0	6
MIMAT0000414	hsa-let-7g-5p	ENSG00000074527	NTN4	protein_coding	chr12	96052553	96052558	96052553	96052558	-	5	0	AGO1-4,AGO2	1	0	0	0	0	0	0	8
MIMAT0000415	hsa-let-7i-5p	ENSG00000074527	NTN4	protein_coding	chr12	96052553	96052558	96052553	96052558	-	5	0	AGO1-4,AGO2	1	0	0	0	0	0	0	6
MIMAT0000418	hsa-miR-23b-3p	ENSG00000074527	NTN4	protein_coding	chr12	96051817	96051822	96051817	96051822	-	3	0	AGO1-4,AGO2	1	0	0	0	0	0	0	6
MIMAT0000423	hsa-miR-125b-5p	ENSG00000074527	NTN4	protein_coding	chr12	96104342	96104365	96104342	96104365	-	2	0	AGO1-4	0	1	0	0	0	0	0	2
MIMAT0000425	hsa-miR-130a-3p	ENSG00000074527	NTN4	protein_coding	chr12	96051967	96051972	96051967	96051972	-	5	0	AGO1,AGO1-4,AGO2	1	0	0	0	0	0	0	7
MIMAT0000428	hsa-miR-135a-5p	ENSG00000074527	NTN4	protein_coding	chr12	96052096	96052101	96052096	96052101	-	1	0	AGO1-4	1	0	0	0	0	0	0	3
MIMAT0000431	hsa-miR-140-5p	ENSG00000074527	NTN4	protein_coding	chr12	96051758	96051764	96051757	96051785	-	5	0	AGO1-4,AGO2	1	0	1	1	1	0	0	6
MIMAT0000431	hsa-miR-140-5p	ENSG00000074527	NTN4	protein_coding	chr12	96052330	96052335	96052329	96052357	-	8	0	AGO1-4,AGO2	1	0	1	1	0	0	0	6
MIMAT0000437	hsa-miR-145-5p	ENSG00000074527	NTN4	protein_coding	chr12	96052777	96052783	96052776	96052798	-	4	0	AGO1-4,AGO2	1	0	1	0	1	0	1	3
MIMAT0000438	hsa-miR-152-3p	ENSG00000074527	NTN4	protein_coding	chr12	96052252	96052257	96052252	96052257	-	4	0	AGO1-4,AGO2	1	0	0	0	0	0	0	7
MIMAT0000443	hsa-miR-125a-5p	ENSG00000074527	NTN4	protein_coding	chr12	96104342	96104364	96104342	96104364	-	2	0	AGO1-4	0	1	0	0	0	0	0	5
MIMAT0000455	hsa-miR-185-5p	ENSG00000074527	NTN4	protein_coding	chr12	96052378	96052383	96052377	96052398	-	6	0	AGO1-4,AGO2	1	0	0	0	1	0	0	14
MIMAT0000456	hsa-miR-186-5p	ENSG00000074527	NTN4	protein_coding	chr12	96051743	96051748	96051743	96051748	-	6	0	AGO1-4,AGO2	1	0	0	0	0	0	0	9
MIMAT0000460	hsa-miR-194-5p	ENSG00000074527	NTN4	protein_coding	chr12	96052418	96052423	96052418	96052423	-	4	0	AGO1-4,AGO2	1	0	0	0	0	0	0	5
MIMAT0000460	hsa-miR-194-5p	ENSG00000074527	NTN4	protein_coding	chr12	96052519	96052524	96052519	96052524	-	5	0	AGO1-4,AGO2	1	0	0	0	0	0	0	5
MIMAT0000510	hsa-miR-320a	ENSG00000074527	NTN4	protein_coding	chr12	96052129	96052135	96052128	96052149	-	2	0	AGO1-4	1	0	0	0	1	0	0	4
MIMAT0000617	hsa-miR-200c-3p	ENSG00000074527	NTN4	protein_coding	chr12	96051907	96051912	96051906	96051927	-	5	0	AGO1-4,AGO2	1	0	0	0	1	0	0	10
MIMAT0000617	hsa-miR-200c-3p	ENSG00000074527	NTN4	protein_coding	chr12	96052362	96052367	96052362	96052367	-	8	0	AGO1-4,AGO2	1	0	0	0	0	0	0	10
MIMAT0000680	hsa-miR-106b-5p	ENSG00000074527	NTN4	protein_coding	chr12	96052343	96052349	96052342	96052370	-	8	0	AGO1-4,AGO2	1	0	1	1	1	1	1	18
MIMAT0000684	hsa-miR-302a-3p	ENSG00000074527	NTN4	protein_coding	chr12	96051966	96051971	96051965	96051993	-	5	0	AGO1,AGO1-4,AGO2	1	0	1	1	1	1	0	2
MIMAT0000684	hsa-miR-302a-3p	ENSG00000074527	NTN4	protein_coding	chr12	96052344	96052350	96052343	96052371	-	8	0	AGO1-4,AGO2	1	0	1	1	1	1	1	2
MIMAT0000684	hsa-miR-302a-3p	ENSG00000074527	NTN4	protein_coding	chr12	96052832	96052837	96052831	96052859	-	5	0	AGO1-4,AGO2	1	0	1	1	0	0	0	2
MIMAT0000686	hsa-miR-34c-5p	ENSG00000074527	NTN4	protein_coding	chr12	96052250	96052256	96052249	96052270	-	4	0	AGO1-4,AGO2	1	1	1	0	1	0	0	3
MIMAT0000691	hsa-miR-130b-3p	ENSG00000074527	NTN4	protein_coding	chr12	96051967	96051972	96051967	96051972	-	5	0	AGO1,AGO1-4,AGO2	1	0	0	0	0	0	0	18
MIMAT0000703	hsa-miR-361-5p	ENSG00000074527	NTN4	protein_coding	chr12	96052650	96052655	96052650	96052655	-	2	0	AGO1-4	1	0	0	0	0	0	0	13
MIMAT0000707	hsa-miR-363-3p	ENSG00000074527	NTN4	protein_coding	chr12	96051972	96051977	96051972	96051977	-	5	0	AGO1,AGO1-4,AGO2	1	0	0	0	0	0	0	8
MIMAT0000715	hsa-miR-302b-3p	ENSG00000074527	NTN4	protein_coding	chr12	96051966	96051971	96051965	96051993	-	5	0	AGO1,AGO1-4,AGO2	1	0	1	1	1	0	0	2
MIMAT0000715	hsa-miR-302b-3p	ENSG00000074527	NTN4	protein_coding	chr12	96052344	96052350	96052343	96052371	-	8	0	AGO1-4,AGO2	1	0	1	1	1	0	1	2
MIMAT0000715	hsa-miR-302b-3p	ENSG00000074527	NTN4	protein_coding	chr12	96052832	96052837	96052831	96052859	-	5	0	AGO1-4,AGO2	1	0	1	1	0	0	0	2
MIMAT0000717	hsa-miR-302c-3p	ENSG00000074527	NTN4	protein_coding	chr12	96051966	96051971	96051965	96051993	-	5	0	AGO1,AGO1-4,AGO2	1	0	1	1	1	0	0	2
MIMAT0000717	hsa-miR-302c-3p	ENSG00000074527	NTN4	protein_coding	chr12	96052344	96052350	96052343	96052371	-	8	0	AGO1-4,AGO2	1	0	1	1	1	0	1	2
MIMAT0000717	hsa-miR-302c-3p	ENSG00000074527	NTN4	protein_coding	chr12	96052832	96052837	96052831	96052859	-	5	0	AGO1-4,AGO2	1	0	1	1	0	0	0	2
MIMAT0000718	hsa-miR-302d-3p	ENSG00000074527	NTN4	protein_coding	chr12	96051966	96051971	96051965	96051993	-	5	0	AGO1,AGO1-4,AGO2	1	0	1	1	1	0	0	1
MIMAT0000718	hsa-miR-302d-3p	ENSG00000074527	NTN4	protein_coding	chr12	96052344	96052350	96052343	96052371	-	8	0	AGO1-4,AGO2	1	0	1	1	1	0	1	1
MIMAT0000718	hsa-miR-302d-3p	ENSG00000074527	NTN4	protein_coding	chr12	96052832	96052837	96052831	96052859	-	5	0	AGO1-4,AGO2	1	0	1	1	0	0	0	1
MIMAT0000719	hsa-miR-367-3p	ENSG00000074527	NTN4	protein_coding	chr12	96051972	96051977	96051972	96051977	-	5	0	AGO1,AGO1-4,AGO2	1	0	0	0	0	0	0	0
MIMAT0000719	hsa-miR-367-3p	ENSG00000074527	NTN4	protein_coding	chr12	96181058	96181082	96181058	96181082	-	3	0	AGO1-4	0	1	0	0	0	0	0	0
MIMAT0000720	hsa-miR-376c-3p	ENSG00000074527	NTN4	protein_coding	chr12	96052824	96052830	96052823	96052842	-	5	0	AGO1-4,AGO2	1	0	1	0	1	0	0	3
MIMAT0000721	hsa-miR-369-3p	ENSG00000074527	NTN4	protein_coding	chr12	96051786	96051791	96051785	96051813	-	4	0	AGO1-4,AGO2	1	0	0	1	0	0	0	3
MIMAT0000723	hsa-miR-371a-3p	ENSG00000074527	NTN4	protein_coding	chr12	96052833	96052838	96052832	96052860	-	5	0	AGO1-4,AGO2	1	0	0	1	0	0	0	3
MIMAT0000724	hsa-miR-372-3p	ENSG00000074527	NTN4	protein_coding	chr12	96051966	96051971	96051965	96051993	-	5	0	AGO1,AGO1-4,AGO2	1	0	1	1	1	0	0	1
MIMAT0000724	hsa-miR-372-3p	ENSG00000074527	NTN4	protein_coding	chr12	96052344	96052350	96052343	96052371	-	8	0	AGO1-4,AGO2	1	0	1	1	1	0	1	1
MIMAT0000724	hsa-miR-372-3p	ENSG00000074527	NTN4	protein_coding	chr12	96052832	96052837	96052831	96052859	-	5	0	AGO1-4,AGO2	1	0	1	1	0	0	0	1
MIMAT0000726	hsa-miR-373-3p	ENSG00000074527	NTN4	protein_coding	chr12	96051966	96051971	96051955	96051993	-	5	0	AGO1,AGO1-4,AGO2	1	0	1	2	1	0	0	1
MIMAT0000726	hsa-miR-373-3p	ENSG00000074527	NTN4	protein_coding	chr12	96052344	96052350	96052343	96052371	-	8	0	AGO1-4,AGO2	1	0	1	1	1	0	1	1
MIMAT0000726	hsa-miR-373-3p	ENSG00000074527	NTN4	protein_coding	chr12	96052832	96052837	96052831	96052859	-	5	0	AGO1-4,AGO2	1	0	1	1	0	0	0	1
MIMAT0000727	hsa-miR-374a-5p	ENSG00000074527	NTN4	protein_coding	chr12	96051847	96051852	96051846	96051870	-	5	0	AGO1-4,AGO2	1	0	0	0	1	0	0	5
MIMAT0000730	hsa-miR-377-3p	ENSG00000074527	NTN4	protein_coding	chr12	96052278	96052284	96052277	96052298	-	5	0	AGO1-4,AGO2	1	0	0	0	1	0	0	1
MIMAT0000736	hsa-miR-381-3p	ENSG00000074527	NTN4	protein_coding	chr12	96051962	96051968	96051961	96051989	-	5	0	AGO1,AGO1-4,AGO2	1	0	1	1	1	0	0	1
MIMAT0000736	hsa-miR-381-3p	ENSG00000074527	NTN4	protein_coding	chr12	96052353	96052359	96052352	96052380	-	8	0	AGO1-4,AGO2	1	0	1	1	1	0	1	1
MIMAT0000751	hsa-miR-330-3p	ENSG00000074527	NTN4	protein_coding	chr12	96051631	96051637	96051631	96051637	-	2	0	AGO2	1	0	1	0	0	0	0	7
MIMAT0000751	hsa-miR-330-3p	ENSG00000074527	NTN4	protein_coding	chr12	96052128	96052133	96052128	96052133	-	2	0	AGO1-4	1	0	1	0	0	0	0	7
MIMAT0000753	hsa-miR-342-3p	ENSG00000074527	NTN4	protein_coding	chr12	96052277	96052284	96052276	96052304	-	6	0	AGO1-4,AGO2	1	0	0	1	1	0	0	5
MIMAT0000758	hsa-miR-135b-5p	ENSG00000074527	NTN4	protein_coding	chr12	96052096	96052101	96052096	96052101	-	1	0	AGO1-4	1	0	0	0	0	0	0	11
MIMAT0000759	hsa-miR-148b-3p	ENSG00000074527	NTN4	protein_coding	chr12	96052252	96052257	96052252	96052257	-	4	0	AGO1-4,AGO2	1	0	0	0	0	0	0	12
MIMAT0000762	hsa-miR-324-3p	ENSG00000074527	NTN4	protein_coding	chr12	96052559	96052564	96052559	96052564	-	5	0	AGO1-4,AGO2	1	0	0	0	0	0	0	19
MIMAT0000765	hsa-miR-335-5p	ENSG00000074527	NTN4	protein_coding	chr12	96052426	96052431	96052426	96052431	-	3	0	AGO1-4,AGO2	1	0	0	0	0	0	0	7
MIMAT0001080	hsa-miR-196b-5p	ENSG00000074527	NTN4	protein_coding	chr12	96052336	96052342	96052335	96052363	-	8	0	AGO1-4,AGO2	1	0	1	1	1	0	0	6
MIMAT0001413	hsa-miR-20b-5p	ENSG00000074527	NTN4	protein_coding	chr12	96052343	96052349	96052342	96052362	-	8	0	AGO1-4,AGO2	1	0	1	0	1	1	1	9
MIMAT0001536	hsa-miR-429	ENSG00000074527	NTN4	protein_coding	chr12	96051907	96051912	96051906	96051927	-	5	0	AGO1-4,AGO2	1	0	0	0	1	0	0	8
MIMAT0001536	hsa-miR-429	ENSG00000074527	NTN4	protein_coding	chr12	96052362	96052369	96052362	96052369	-	8	0	AGO1-4,AGO2	1	0	0	0	0	0	0	8
MIMAT0001541	hsa-miR-449a	ENSG00000074527	NTN4	protein_coding	chr12	96052250	96052256	96052249	96052269	-	4	0	AGO1-4,AGO2	1	1	1	0	1	0	0	3
MIMAT0001541	hsa-miR-449a	ENSG00000074527	NTN4	protein_coding	chr12	96107067	96107088	96107067	96107088	-	1	0	AGO1-4	0	1	0	0	0	0	0	3
MIMAT0001627	hsa-miR-433-3p	ENSG00000074527	NTN4	protein_coding	chr12	96052677	96052682	96052676	96052697	-	3	0	AGO1-4,AGO2	1	0	0	0	1	0	0	0
MIMAT0001629	hsa-miR-329-3p	ENSG00000074527	NTN4	protein_coding	chr12	96052280	96052286	96052279	96052299	-	5	0	AGO1-4,AGO2	1	0	1	0	1	0	0	3
MIMAT0001629	hsa-miR-329-3p	ENSG00000074527	NTN4	protein_coding	chr12	96052421	96052426	96052421	96052426	-	4	0	AGO1-4,AGO2	1	0	1	0	0	0	0	3
MIMAT0001635	hsa-miR-452-5p	ENSG00000074527	NTN4	protein_coding	chr12	96051860	96051865	96051859	96051887	-	4	0	AGO1-4,AGO2	1	0	0	1	0	1	0	11
MIMAT0001635	hsa-miR-452-5p	ENSG00000074527	NTN4	protein_coding	chr12	96051885	96051891	96051884	96051912	-	5	0	AGO1-4,AGO2	1	0	0	1	0	0	0	11
MIMAT0001639	hsa-miR-409-3p	ENSG00000074527	NTN4	protein_coding	chr12	96051893	96051898	96051893	96051898	-	4	0	AGO1-4,AGO2	1	0	0	0	0	0	0	4
MIMAT0002171	hsa-miR-410-3p	ENSG00000074527	NTN4	protein_coding	chr12	96051614	96051619	96051613	96051641	-	3	0	AGO1-4,AGO2	1	0	1	1	1	0	0	2
MIMAT0002171	hsa-miR-410-3p	ENSG00000074527	NTN4	protein_coding	chr12	96051846	96051851	96051845	96051873	-	5	0	AGO1-4,AGO2	1	0	1	1	0	0	0	2
MIMAT0002171	hsa-miR-410-3p	ENSG00000074527	NTN4	protein_coding	chr12	96051923	96051929	96051922	96051950	-	3	0	AGO1-4,AGO2	1	0	1	1	1	0	0	2
MIMAT0002178	hsa-miR-487a-3p	ENSG00000074527	NTN4	protein_coding	chr12	96051587	96051592	96051587	96051592	-	4	0	AGO1-4,AGO2	1	0	0	0	0	0	0	1
MIMAT0002813	hsa-miR-493-5p	ENSG00000074527	NTN4	protein_coding	chr12	96052821	96052827	96052820	96052848	-	5	0	AGO1-4,AGO2	0	0	1	1	0	0	0	2
MIMAT0002814	hsa-miR-432-5p	ENSG00000074527	NTN4	protein_coding	chr12	96052107	96052114	96052107	96052114	-	1	0	AGO1-4	1	0	0	0	0	0	0	1
MIMAT0002817	hsa-miR-495-3p	ENSG00000074527	NTN4	protein_coding	chr12	96051621	96051626	96051620	96051648	-	4	0	AGO1-4,AGO2	1	0	1	1	1	0	0	1
MIMAT0002817	hsa-miR-495-3p	ENSG00000074527	NTN4	protein_coding	chr12	96051629	96051634	96051628	96051656	-	4	0	AGO1-4,AGO2	1	0	1	1	1	0	0	1
MIMAT0002817	hsa-miR-495-3p	ENSG00000074527	NTN4	protein_coding	chr12	96051927	96051932	96051926	96051954	-	4	0	AGO1-4,AGO2	1	0	1	1	1	0	0	1
MIMAT0002817	hsa-miR-495-3p	ENSG00000074527	NTN4	protein_coding	chr12	96052442	96052448	96052441	96052469	-	3	0	AGO1-4,AGO2	1	0	1	1	1	0	0	1
MIMAT0002823	hsa-miR-512-3p	ENSG00000074527	NTN4	protein_coding	chr12	96052253	96052259	96052252	96052280	-	5	0	AGO1-4,AGO2	1	0	1	1	0	0	0	3
MIMAT0002823	hsa-miR-512-3p	ENSG00000074527	NTN4	protein_coding	chr12	96052345	96052350	96052344	96052372	-	8	0	AGO1-4,AGO2	1	0	1	1	0	0	0	3
MIMAT0002823	hsa-miR-512-3p	ENSG00000074527	NTN4	protein_coding	chr12	96052917	96052945	96052917	96052945	-	10	0	AGO1-4,AGO2	0	0	0	1	0	0	0	3
MIMAT0002823	hsa-miR-512-3p	ENSG00000074527	NTN4	protein_coding	chr12	96107061	96107084	96107061	96107089	-	1	0	AGO1-4	0	1	0	1	0	0	0	3
MIMAT0002824	hsa-miR-498	ENSG00000074527	NTN4	protein_coding	chr12	96051733	96051738	96051733	96051738	-	6	0	AGO1-4,AGO2	1	0	0	0	0	0	0	3
MIMAT0002825	hsa-miR-520e	ENSG00000074527	NTN4	protein_coding	chr12	96051966	96051971	96051965	96051993	-	5	0	AGO1,AGO1-4,AGO2	1	0	1	1	1	1	0	3
MIMAT0002825	hsa-miR-520e	ENSG00000074527	NTN4	protein_coding	chr12	96052344	96052350	96052343	96052371	-	8	0	AGO1-4,AGO2	1	0	1	1	1	1	1	3
MIMAT0002826	hsa-miR-515-5p	ENSG00000074527	NTN4	protein_coding	chr12	96052185	96052191	96052185	96052191	-	3	0	AGO1-4,AGO2	1	0	0	0	0	0	0	3
MIMAT0002828	hsa-miR-519e-5p	ENSG00000074527	NTN4	protein_coding	chr12	96052184	96052212	96052184	96052212	-	4	0	AGO1-4,AGO2	0	0	0	1	0	0	0	0
MIMAT0002830	hsa-miR-520f-3p	ENSG00000074527	NTN4	protein_coding	chr12	96052253	96052258	96052252	96052280	-	5	0	AGO1-4,AGO2	1	0	1	1	0	0	0	3
MIMAT0002830	hsa-miR-520f-3p	ENSG00000074527	NTN4	protein_coding	chr12	96052345	96052351	96052344	96052372	-	8	0	AGO1-4,AGO2	1	0	1	1	0	1	1	3
MIMAT0002832	hsa-miR-519c-3p	ENSG00000074527	NTN4	protein_coding	chr12	96051966	96051972	96051965	96051993	-	5	0	AGO1,AGO1-4,AGO2	1	0	1	1	0	0	0	2
MIMAT0002832	hsa-miR-519c-3p	ENSG00000074527	NTN4	protein_coding	chr12	96052344	96052349	96052343	96052371	-	8	0	AGO1-4,AGO2	1	0	1	1	0	0	0	2
MIMAT0002832	hsa-miR-519c-3p	ENSG00000074527	NTN4	protein_coding	chr12	96052832	96052837	96052832	96052837	-	5	0	AGO1-4,AGO2	1	0	1	0	0	0	0	2
MIMAT0002832	hsa-miR-519c-3p	ENSG00000074527	NTN4	protein_coding	chr12	96059603	96059631	96059603	96059631	-	4	0	AGO1-4	0	0	0	1	0	0	0	2
MIMAT0002832	hsa-miR-519c-3p	ENSG00000074527	NTN4	protein_coding	chr12	96076492	96076520	96076492	96076520	-	2	0	AGO1-4	0	0	0	1	0	0	0	2
MIMAT0002833	hsa-miR-520a-5p	ENSG00000074527	NTN4	protein_coding	chr12	96052707	96052714	96052707	96052714	-	2	0	AGO1-4	1	0	0	0	0	0	0	5
MIMAT0002834	hsa-miR-520a-3p	ENSG00000074527	NTN4	protein_coding	chr12	96051966	96051971	96051965	96051993	-	5	0	AGO1,AGO1-4,AGO2	1	0	1	1	1	0	0	1
MIMAT0002834	hsa-miR-520a-3p	ENSG00000074527	NTN4	protein_coding	chr12	96052344	96052350	96052343	96052371	-	8	0	AGO1-4,AGO2	1	0	1	1	1	0	1	1
MIMAT0002836	hsa-miR-526b-3p	ENSG00000074527	NTN4	protein_coding	chr12	96052343	96052349	96052342	96052370	-	8	0	AGO1-4,AGO2	0	0	1	1	0	1	1	3
MIMAT0002837	hsa-miR-519b-3p	ENSG00000074527	NTN4	protein_coding	chr12	96051966	96051972	96051965	96051993	-	5	0	AGO1,AGO1-4,AGO2	1	0	1	1	0	0	0	1
MIMAT0002837	hsa-miR-519b-3p	ENSG00000074527	NTN4	protein_coding	chr12	96052344	96052349	96052343	96052371	-	8	0	AGO1-4,AGO2	1	0	1	1	0	0	0	1
MIMAT0002837	hsa-miR-519b-3p	ENSG00000074527	NTN4	protein_coding	chr12	96052832	96052837	96052832	96052837	-	5	0	AGO1-4,AGO2	1	0	1	0	0	0	0	1
MIMAT0002837	hsa-miR-519b-3p	ENSG00000074527	NTN4	protein_coding	chr12	96059603	96059631	96059603	96059631	-	4	0	AGO1-4	0	0	0	1	0	0	0	1
MIMAT0002837	hsa-miR-519b-3p	ENSG00000074527	NTN4	protein_coding	chr12	96076492	96076520	96076492	96076520	-	2	0	AGO1-4	0	0	0	1	0	0	0	1
MIMAT0002838	hsa-miR-525-5p	ENSG00000074527	NTN4	protein_coding	chr12	96052707	96052714	96052707	96052714	-	2	0	AGO1-4	1	0	0	0	0	0	0	2
MIMAT0002839	hsa-miR-525-3p	ENSG00000074527	NTN4	protein_coding	chr12	96052538	96052543	96052538	96052543	-	5	0	AGO1-4,AGO2	1	0	0	0	0	0	0	4
MIMAT0002843	hsa-miR-520b	ENSG00000074527	NTN4	protein_coding	chr12	96051966	96051971	96051965	96051993	-	5	0	AGO1,AGO1-4,AGO2	1	0	1	1	1	0	0	3
MIMAT0002843	hsa-miR-520b	ENSG00000074527	NTN4	protein_coding	chr12	96052344	96052350	96052343	96052371	-	8	0	AGO1-4,AGO2	1	0	1	1	1	0	1	3
MIMAT0002846	hsa-miR-520c-3p	ENSG00000074527	NTN4	protein_coding	chr12	96051966	96051971	96051965	96051993	-	5	0	AGO1,AGO1-4,AGO2	1	0	1	1	1	0	0	3
MIMAT0002846	hsa-miR-520c-3p	ENSG00000074527	NTN4	protein_coding	chr12	96052344	96052350	96052343	96052371	-	8	0	AGO1-4,AGO2	1	0	1	1	1	0	1	3
MIMAT0002849	hsa-miR-524-5p	ENSG00000074527	NTN4	protein_coding	chr12	96051739	96051746	96051739	96051746	-	6	0	AGO1-4,AGO2	1	0	0	0	0	0	0	2
MIMAT0002850	hsa-miR-524-3p	ENSG00000074527	NTN4	protein_coding	chr12	96052538	96052543	96052538	96052543	-	5	0	AGO1-4,AGO2	1	0	0	0	0	0	0	1
MIMAT0002853	hsa-miR-519d-3p	ENSG00000074527	NTN4	protein_coding	chr12	96052343	96052349	96052342	96052370	-	8	0	AGO1-4,AGO2	1	0	1	1	1	0	1	2
MIMAT0002855	hsa-miR-520d-5p	ENSG00000074527	NTN4	protein_coding	chr12	96051739	96051746	96051739	96051746	-	6	0	AGO1-4,AGO2	1	0	0	0	0	0	0	1
MIMAT0002856	hsa-miR-520d-3p	ENSG00000074527	NTN4	protein_coding	chr12	96051966	96051971	96051965	96051993	-	5	0	AGO1,AGO1-4,AGO2	1	0	1	1	1	0	0	1
MIMAT0002856	hsa-miR-520d-3p	ENSG00000074527	NTN4	protein_coding	chr12	96052344	96052350	96052343	96052371	-	8	0	AGO1-4,AGO2	1	0	1	1	1	0	1	1
MIMAT0002856	hsa-miR-520d-3p	ENSG00000074527	NTN4	protein_coding	chr12	96052832	96052837	96052831	96052859	-	5	0	AGO1-4,AGO2	1	0	1	1	0	0	0	1
MIMAT0002858	hsa-miR-520g-3p	ENSG00000074527	NTN4	protein_coding	chr12	96052406	96052411	96052406	96052411	-	5	0	AGO1-4,AGO2	1	0	0	0	0	0	0	2
MIMAT0002867	hsa-miR-520h	ENSG00000074527	NTN4	protein_coding	chr12	96052406	96052411	96052406	96052411	-	5	0	AGO1-4,AGO2	1	0	0	0	0	0	0	1
MIMAT0002869	hsa-miR-519a-3p	ENSG00000074527	NTN4	protein_coding	chr12	96051966	96051972	96051965	96051993	-	5	0	AGO1,AGO1-4,AGO2	1	0	1	1	0	0	0	2
MIMAT0002869	hsa-miR-519a-3p	ENSG00000074527	NTN4	protein_coding	chr12	96052344	96052349	96052343	96052371	-	8	0	AGO1-4,AGO2	1	0	1	1	0	0	0	2
MIMAT0002869	hsa-miR-519a-3p	ENSG00000074527	NTN4	protein_coding	chr12	96052832	96052837	96052832	96052837	-	5	0	AGO1-4,AGO2	1	0	1	0	0	0	0	2
MIMAT0002869	hsa-miR-519a-3p	ENSG00000074527	NTN4	protein_coding	chr12	96059603	96059631	96059603	96059631	-	4	0	AGO1-4	0	0	0	1	0	0	0	2
MIMAT0002869	hsa-miR-519a-3p	ENSG00000074527	NTN4	protein_coding	chr12	96076492	96076520	96076492	96076520	-	2	0	AGO1-4	0	0	0	1	0	0	0	2
MIMAT0002870	hsa-miR-499a-5p	ENSG00000074527	NTN4	protein_coding	chr12	96052727	96052732	96052727	96052732	-	3	0	AGO1-4,AGO2	1	0	0	0	0	0	0	5
MIMAT0002890	hsa-miR-299-5p	ENSG00000074527	NTN4	protein_coding	chr12	96051901	96051906	96051901	96051906	-	5	0	AGO1-4,AGO2	1	0	1	0	0	0	0	5
MIMAT0002890	hsa-miR-299-5p	ENSG00000074527	NTN4	protein_coding	chr12	96052070	96052075	96052070	96052075	-	1	0	AGO1-4	1	0	1	0	0	0	0	5
MIMAT0003215	hsa-miR-552-3p	ENSG00000074527	NTN4	protein_coding	chr12	96051838	96051845	96051838	96051845	-	2	0	AGO1-4,AGO2	1	0	0	0	0	0	0	4
MIMAT0003218	hsa-miR-92b-3p	ENSG00000074527	NTN4	protein_coding	chr12	96051972	96051977	96051972	96051977	-	5	0	AGO1,AGO1-4,AGO2	1	0	0	0	0	0	0	10
MIMAT0003220	hsa-miR-556-5p	ENSG00000074527	NTN4	protein_coding	chr12	96051979	96051985	96051979	96051986	-	3	0	AGO1-4,AGO2	1	0	1	0	0	0	0	6
MIMAT0003242	hsa-miR-577	ENSG00000074527	NTN4	protein_coding	chr12	96052715	96052720	96052715	96052720	-	2	0	AGO1-4	1	0	0	0	0	0	0	10
MIMAT0003242	hsa-miR-577	ENSG00000074527	NTN4	protein_coding	chr12	96052724	96052729	96052724	96052729	-	3	0	AGO1-4,AGO2	1	0	0	0	0	0	0	10
MIMAT0003244	hsa-miR-579-3p	ENSG00000074527	NTN4	protein_coding	chr12	96052667	96052672	96052667	96052672	-	3	0	AGO1-4,AGO2	1	0	0	0	0	0	0	3
MIMAT0003249	hsa-miR-584-5p	ENSG00000074527	NTN4	protein_coding	chr12	96052224	96052229	96052224	96052229	-	4	0	AGO1-4,AGO2	1	0	0	0	0	0	0	9
MIMAT0003267	hsa-miR-599	ENSG00000074527	NTN4	protein_coding	chr12	96051826	96051831	96051826	96051831	-	2	0	AGO1-4,AGO2	1	0	0	0	0	0	0	4
MIMAT0003267	hsa-miR-599	ENSG00000074527	NTN4	protein_coding	chr12	96052813	96052818	96052812	96052831	-	5	0	AGO1-4,AGO2	1	0	0	0	1	0	0	4
MIMAT0003289	hsa-miR-620	ENSG00000074527	NTN4	protein_coding	chr12	96052377	96052382	96052377	96052382	-	6	0	AGO1-4,AGO2	1	0	0	0	0	0	0	0
MIMAT0003301	hsa-miR-33b-5p	ENSG00000074527	NTN4	protein_coding	chr12	96051969	96051975	96051968	96051996	-	5	0	AGO1,AGO1-4,AGO2	1	0	1	1	1	0	0	21
MIMAT0003301	hsa-miR-33b-5p	ENSG00000074527	NTN4	protein_coding	chr12	96052736	96052741	96052735	96052763	-	4	0	AGO1-4,AGO2	1	0	1	1	0	0	0	21
MIMAT0003301	hsa-miR-33b-5p	ENSG00000074527	NTN4	protein_coding	chr12	96131693	96131721	96131693	96131721	-	3	0	AGO1-4,AGO2	0	0	0	1	0	0	0	21
MIMAT0003311	hsa-miR-641	ENSG00000074527	NTN4	protein_coding	chr12	96051870	96051875	96051870	96051875	-	4	0	AGO1-4,AGO2	1	0	0	0	0	0	0	6
MIMAT0003327	hsa-miR-449b-5p	ENSG00000074527	NTN4	protein_coding	chr12	96052250	96052256	96052249	96052267	-	4	0	AGO1-4,AGO2	1	1	1	0	1	0	0	4
MIMAT0003327	hsa-miR-449b-5p	ENSG00000074527	NTN4	protein_coding	chr12	96107067	96107087	96107067	96107087	-	1	0	AGO1-4	0	1	0	0	0	0	0	4
MIMAT0003338	hsa-miR-660-5p	ENSG00000074527	NTN4	protein_coding	chr12	96052731	96052736	96052731	96052736	-	3	0	AGO1-4,AGO2	1	0	0	0	0	0	0	10
MIMAT0003339	hsa-miR-421	ENSG00000074527	NTN4	protein_coding	chr12	96052299	96052305	96052298	96052319	-	8	0	AGO1-4,AGO2	1	0	0	0	1	0	0	8
MIMAT0003881	hsa-miR-668-3p	ENSG00000074527	NTN4	protein_coding	chr12	96052228	96052233	96052228	96052233	-	4	0	AGO1-4,AGO2	1	0	0	0	0	0	0	2
MIMAT0003885	hsa-miR-454-3p	ENSG00000074527	NTN4	protein_coding	chr12	96051967	96051972	96051967	96051972	-	5	0	AGO1,AGO1-4,AGO2	1	0	0	0	0	0	0	12
MIMAT0004185	hsa-miR-802	ENSG00000074527	NTN4	protein_coding	chr12	96052518	96052524	96052518	96052524	-	5	0	AGO1-4,AGO2	1	0	0	0	0	0	0	3
MIMAT0004563	hsa-miR-199b-3p	ENSG00000074527	NTN4	protein_coding	chr12	96052266	96052271	96052265	96052271	-	4	0	AGO1-4,AGO2	1	0	0	0	0	1	0	3
MIMAT0004593	hsa-miR-130a-5p	ENSG00000074527	NTN4	protein_coding	chr12	96059696	96059724	96059696	96059724	-	3	0	AGO1-4,AGO2	0	0	0	1	0	0	0	6
MIMAT0004593	hsa-miR-130a-5p	ENSG00000074527	NTN4	protein_coding	chr12	96181068	96181096	96181068	96181096	-	3	0	AGO1-4	0	0	0	1	0	0	0	6
MIMAT0004679	hsa-miR-296-3p	ENSG00000074527	NTN4	protein_coding	chr12	96052464	96052471	96052464	96052471	-	3	0	AGO1-4,AGO2	1	0	0	0	0	0	0	8
MIMAT0004683	hsa-miR-362-3p	ENSG00000074527	NTN4	protein_coding	chr12	96052280	96052286	96052279	96052300	-	5	0	AGO1-4,AGO2	1	0	1	0	1	0	0	6
MIMAT0004683	hsa-miR-362-3p	ENSG00000074527	NTN4	protein_coding	chr12	96052421	96052426	96052421	96052426	-	4	0	AGO1-4,AGO2	1	0	1	0	0	0	0	6
MIMAT0004687	hsa-miR-371a-5p	ENSG00000074527	NTN4	protein_coding	chr12	96052126	96052131	96052126	96052131	-	2	0	AGO1-4	1	0	0	0	0	0	0	3
MIMAT0004692	hsa-miR-340-5p	ENSG00000074527	NTN4	protein_coding	chr12	96051615	96051620	96051614	96051636	-	3	0	AGO1-4,AGO2	1	0	0	0	1	0	0	10
MIMAT0004784	hsa-miR-455-3p	ENSG00000074527	NTN4	protein_coding	chr12	96052631	96052636	96052631	96052636	-	2	0	AGO1-4	1	0	0	0	0	0	0	10
MIMAT0004793	hsa-miR-556-3p	ENSG00000074527	NTN4	protein_coding	chr12	96051599	96051604	96051599	96051604	-	5	0	AGO1-4,AGO2	1	0	1	0	0	0	0	10
MIMAT0004793	hsa-miR-556-3p	ENSG00000074527	NTN4	protein_coding	chr12	96051856	96051861	96051856	96051861	-	4	0	AGO1-4,AGO2	1	0	1	0	0	0	0	10
MIMAT0004805	hsa-miR-616-3p	ENSG00000074527	NTN4	protein_coding	chr12	96052486	96052491	96052486	96052491	-	3	0	AGO1-4,AGO2	1	0	0	0	0	0	0	10
MIMAT0004807	hsa-miR-624-3p	ENSG00000074527	NTN4	protein_coding	chr12	96051873	96051878	96051873	96051878	-	4	0	AGO1-4,AGO2	1	0	1	0	0	0	0	2
MIMAT0004807	hsa-miR-624-3p	ENSG00000074527	NTN4	protein_coding	chr12	96052355	96052360	96052355	96052360	-	8	0	AGO1-4,AGO2	1	0	1	0	0	0	0	2
MIMAT0004810	hsa-miR-629-5p	ENSG00000074527	NTN4	protein_coding	chr12	96052661	96052666	96052661	96052666	-	3	0	AGO1-4,AGO2	1	0	0	0	0	0	0	14
MIMAT0004814	hsa-miR-654-3p	ENSG00000074527	NTN4	protein_coding	chr12	96052025	96052032	96052025	96052032	-	5	0	AGO1-4,AGO2	1	0	0	0	0	0	0	1
MIMAT0004903	hsa-miR-300	ENSG00000074527	NTN4	protein_coding	chr12	96051962	96051968	96051961	96051989	-	5	0	AGO1,AGO1-4,AGO2	1	0	1	1	1	0	0	0
MIMAT0004903	hsa-miR-300	ENSG00000074527	NTN4	protein_coding	chr12	96052353	96052359	96052352	96052380	-	8	0	AGO1-4,AGO2	1	0	1	1	1	0	1	0
MIMAT0004909	hsa-miR-450b-5p	ENSG00000074527	NTN4	protein_coding	chr12	96051651	96051657	96051651	96051657	-	3	0	AGO1-4,AGO2	1	0	0	0	0	0	0	8
MIMAT0004911	hsa-miR-874-3p	ENSG00000074527	NTN4	protein_coding	chr12	96052560	96052565	96052560	96052565	-	5	0	AGO1-4,AGO2	1	0	0	0	0	0	0	6
MIMAT0004947	hsa-miR-885-5p	ENSG00000074527	NTN4	protein_coding	chr12	96052837	96052842	96052837	96052842	-	5	0	AGO1-4,AGO2	1	0	0	0	0	0	0	6
MIMAT0004949	hsa-miR-877-5p	ENSG00000074527	NTN4	protein_coding	chr12	96052551	96052556	96052551	96052556	-	5	0	AGO1-4,AGO2	1	0	0	0	0	0	0	16
MIMAT0004954	hsa-miR-543	ENSG00000074527	NTN4	protein_coding	chr12	96052744	96052749	96052744	96052749	-	3	0	AGO1-4,AGO2	1	0	0	0	0	0	0	3
MIMAT0004955	hsa-miR-374b-5p	ENSG00000074527	NTN4	protein_coding	chr12	96051847	96051852	96051846	96051870	-	5	0	AGO1-4,AGO2	1	0	0	0	1	0	0	8
MIMAT0004957	hsa-miR-760	ENSG00000074527	NTN4	protein_coding	chr12	96052434	96052439	96052434	96052439	-	3	0	AGO1-4,AGO2	1	0	0	0	0	0	0	10
MIMAT0004960	hsa-miR-208b-3p	ENSG00000074527	NTN4	protein_coding	chr12	96052727	96052732	96052727	96052732	-	3	0	AGO1-4,AGO2	1	0	0	0	0	0	0	3
MIMAT0004977	hsa-miR-934	ENSG00000074527	NTN4	protein_coding	chr12	96051939	96051944	96051938	96051966	-	5	0	AGO1,AGO1-4,AGO2	1	0	1	1	0	0	0	1
MIMAT0004977	hsa-miR-934	ENSG00000074527	NTN4	protein_coding	chr12	96052027	96052032	96052026	96052054	-	5	0	AGO1-4,AGO2	1	0	1	1	0	0	0	1
MIMAT0004987	hsa-miR-944	ENSG00000074527	NTN4	protein_coding	chr12	96051697	96051703	96051697	96051703	-	5	0	AGO1-4,AGO2	1	0	0	0	0	0	0	6
MIMAT0005792	hsa-miR-320b	ENSG00000074527	NTN4	protein_coding	chr12	96052129	96052135	96052128	96052149	-	2	0	AGO1-4	1	0	0	0	1	0	0	9
MIMAT0005793	hsa-miR-320c	ENSG00000074527	NTN4	protein_coding	chr12	96052129	96052135	96052128	96052147	-	2	0	AGO1-4	1	0	0	0	1	0	0	2
MIMAT0005796	hsa-miR-1271-5p	ENSG00000074527	NTN4	protein_coding	chr12	96052760	96052766	96052759	96052787	-	3	0	AGO1-4	1	0	1	1	1	1	1	8
MIMAT0005796	hsa-miR-1271-5p	ENSG00000074527	NTN4	protein_coding	chr12	96131866	96131894	96131866	96131894	-	6	0	AGO1-4	0	0	0	1	0	0	0	8
MIMAT0005800	hsa-miR-1298-5p	ENSG00000074527	NTN4	protein_coding	chr12	96052487	96052492	96052487	96052492	-	3	0	AGO1-4,AGO2	1	0	0	0	0	0	0	2
MIMAT0005878	hsa-miR-1287-5p	ENSG00000074527	NTN4	protein_coding	chr12	96052533	96052538	96052533	96052538	-	5	0	AGO1-4,AGO2	1	0	0	0	0	0	0	5
MIMAT0005886	hsa-miR-1297	ENSG00000074527	NTN4	protein_coding	chr12	96051734	96051740	96051733	96051761	-	6	0	AGO1-4,AGO2	1	0	0	1	1	1	1	0
MIMAT0005924	hsa-miR-1270	ENSG00000074527	NTN4	protein_coding	chr12	96052377	96052382	96052377	96052382	-	6	0	AGO1-4,AGO2	1	0	0	0	0	0	0	1
MIMAT0005931	hsa-miR-302e	ENSG00000074527	NTN4	protein_coding	chr12	96051966	96051971	96051965	96051993	-	5	0	AGO1,AGO1-4,AGO2	1	0	1	1	1	1	0	0
MIMAT0005931	hsa-miR-302e	ENSG00000074527	NTN4	protein_coding	chr12	96052344	96052350	96052343	96052371	-	8	0	AGO1-4,AGO2	1	0	1	1	1	1	1	0
MIMAT0005931	hsa-miR-302e	ENSG00000074527	NTN4	protein_coding	chr12	96052832	96052837	96052831	96052859	-	5	0	AGO1-4,AGO2	1	0	1	1	0	0	0	0
MIMAT0006764	hsa-miR-320d	ENSG00000074527	NTN4	protein_coding	chr12	96052129	96052135	96052128	96052146	-	2	0	AGO1-4	1	0	0	0	1	0	0	2
MIMAT0011161	hsa-miR-2116-3p	ENSG00000074527	NTN4	protein_coding	chr12	96104351	96104370	96104351	96104370	-	2	0	AGO1-4	0	1	0	0	0	0	0	3
MIMAT0014983	hsa-miR-3121-3p	ENSG00000074527	NTN4	protein_coding	chr12	96052203	96052231	96052203	96052231	-	4	0	AGO1-4,AGO2	0	0	0	1	0	0	0	0
MIMAT0014992	hsa-miR-3129-5p	ENSG00000074527	NTN4	protein_coding	chr12	96052265	96052271	96052265	96052271	-	4	0	AGO1-4,AGO2	0	0	0	0	0	1	0	2
MIMAT0015037	hsa-miR-3163	ENSG00000074527	NTN4	protein_coding	chr12	96051615	96051643	96051615	96051643	-	3	0	AGO1-4,AGO2	0	0	0	1	0	0	0	3
MIMAT0015037	hsa-miR-3163	ENSG00000074527	NTN4	protein_coding	chr12	96052683	96052711	96052683	96052711	-	3	0	AGO1-4,AGO2	0	0	0	1	0	0	0	3
MIMAT0016870	hsa-miR-4319	ENSG00000074527	NTN4	protein_coding	chr12	96104342	96104358	96104342	96104358	-	2	0	AGO1-4	0	1	0	0	0	0	0	0
MIMAT0018199	hsa-miR-3924	ENSG00000074527	NTN4	protein_coding	chr12	96051750	96051778	96051750	96051778	-	6	0	AGO1-4,AGO2	0	0	0	1	0	0	0	1
MIMAT0018358	hsa-miR-3942-5p	ENSG00000074527	NTN4	protein_coding	chr12	96051634	96051640	96051633	96051661	-	4	0	AGO1-4,AGO2	0	0	1	1	0	0	0	8
MIMAT0018992	hsa-miR-4465	ENSG00000074527	NTN4	protein_coding	chr12	96051734	96051740	96051733	96051740	-	6	0	AGO1-4,AGO2	0	0	0	0	0	1	1	3
MIMAT0019759	hsa-miR-4676-3p	ENSG00000074527	NTN4	protein_coding	chr12	96051859	96051865	96051859	96051887	-	4	0	AGO1-4,AGO2	0	0	0	1	0	1	0	2
MIMAT0019759	hsa-miR-4676-3p	ENSG00000074527	NTN4	protein_coding	chr12	96051884	96051912	96051884	96051912	-	5	0	AGO1-4,AGO2	0	0	0	1	0	0	0	2
MIMAT0019801	hsa-miR-4703-5p	ENSG00000074527	NTN4	protein_coding	chr12	96051634	96051640	96051634	96051640	-	1	0	AGO2	0	0	1	0	0	0	0	0
MIMAT0021086	hsa-miR-5094	ENSG00000074527	NTN4	protein_coding	chr12	96052629	96052634	96052629	96052634	-	2	0	AGO1-4	0	0	1	0	0	0	0	8
MIMAT0021086	hsa-miR-5094	ENSG00000074527	NTN4	protein_coding	chr12	96052651	96052657	96052651	96052657	-	3	0	AGO1-4,AGO2	0	0	1	0	0	0	0	8
MIMAT0021127	hsa-miR-5195-3p	ENSG00000074527	NTN4	protein_coding	chr12	96052777	96052783	96052776	96052804	-	4	0	AGO1-4,AGO2	0	0	1	1	0	0	1	1
MIMAT0022479	hsa-miR-5688	ENSG00000074527	NTN4	protein_coding	chr12	96051621	96051626	96051620	96051648	-	4	0	AGO1-4,AGO2	0	0	1	1	0	0	0	1
MIMAT0022479	hsa-miR-5688	ENSG00000074527	NTN4	protein_coding	chr12	96051629	96051634	96051628	96051656	-	4	0	AGO1-4,AGO2	0	0	1	1	0	0	0	1
MIMAT0022479	hsa-miR-5688	ENSG00000074527	NTN4	protein_coding	chr12	96051927	96051932	96051926	96051954	-	4	0	AGO1-4,AGO2	0	0	1	1	0	0	0	1
MIMAT0022479	hsa-miR-5688	ENSG00000074527	NTN4	protein_coding	chr12	96052442	96052448	96052441	96052469	-	3	0	AGO1-4,AGO2	0	0	1	1	0	0	0	1
MIMAT0022714	hsa-miR-766-5p	ENSG00000074527	NTN4	protein_coding	chr12	96051877	96051883	96051877	96051883	-	4	0	AGO1-4,AGO2	0	0	1	0	0	0	0	2
MIMAT0022724	hsa-miR-1277-5p	ENSG00000074527	NTN4	protein_coding	chr12	96051613	96051618	96051612	96051640	-	3	0	AGO1-4,AGO2	0	0	1	1	0	0	0	1
MIMAT0022724	hsa-miR-1277-5p	ENSG00000074527	NTN4	protein_coding	chr12	96051637	96051643	96051636	96051664	-	4	0	AGO1-4,AGO2	0	1	1	1	0	0	0	1
MIMAT0022724	hsa-miR-1277-5p	ENSG00000074527	NTN4	protein_coding	chr12	96051845	96051850	96051844	96051872	-	5	0	AGO1-4,AGO2	0	0	1	1	0	0	0	1
MIMAT0022724	hsa-miR-1277-5p	ENSG00000074527	NTN4	protein_coding	chr12	96051921	96051949	96051921	96051949	-	3	0	AGO1-4,AGO2	0	0	0	1	0	0	0	1
MIMAT0025858	hsa-miR-892c-3p	ENSG00000074527	NTN4	protein_coding	chr12	96051859	96051865	96051859	96051865	-	3	0	AGO1-4	0	0	0	0	0	1	0	5

## Sheet: NTNG1
miRNAid	miRNAname	geneID	geneName	geneType	chromosome	narrowStart	narrowEnd	broadStart	broadEnd	strand	clipExpNum	degraExpNum	RBP	PITA	RNA22	miRmap	microT	miRanda	PicTar	TargetScan	pancancerNum
MIMAT0000070	hsa-miR-17-5p	ENSG00000162631	NTNG1	protein_coding	chr1	108025821	108025827	108025821	108025828	+	1	0	AGO2	0	0	1	0	0	0	1	11
MIMAT0000070	hsa-miR-17-5p	ENSG00000162631	NTNG1	protein_coding	chr1	108026070	108026075	108026070	108026075	+	1	0	AGO2	0	0	1	0	0	0	0	11
MIMAT0000075	hsa-miR-20a-5p	ENSG00000162631	NTNG1	protein_coding	chr1	108025821	108025827	108025821	108025828	+	1	0	AGO2	0	0	1	0	0	0	1	8
MIMAT0000075	hsa-miR-20a-5p	ENSG00000162631	NTNG1	protein_coding	chr1	108026070	108026075	108026070	108026075	+	1	0	AGO2	0	0	1	0	0	0	0	8
MIMAT0000087	hsa-miR-30a-5p	ENSG00000162631	NTNG1	protein_coding	chr1	108024354	108024375	108024354	108024375	+	1	0	AGO1-4	0	0	0	0	1	0	0	3
MIMAT0000090	hsa-miR-32-5p	ENSG00000162631	NTNG1	protein_coding	chr1	107691433	107691461	107691433	107691461	+	2	0	AGO2	0	0	0	1	0	0	0	11
MIMAT0000093	hsa-miR-93-5p	ENSG00000162631	NTNG1	protein_coding	chr1	108025821	108025827	108025821	108025828	+	1	0	AGO2	0	0	1	0	0	0	1	11
MIMAT0000093	hsa-miR-93-5p	ENSG00000162631	NTNG1	protein_coding	chr1	108026070	108026075	108026070	108026075	+	1	0	AGO2	0	0	1	0	0	0	0	11
MIMAT0000099	hsa-miR-101-3p	ENSG00000162631	NTNG1	protein_coding	chr1	108024188	108024193	108024174	108024194	+	1	0	AGO2	1	0	0	0	1	0	0	1
MIMAT0000103	hsa-miR-106a-5p	ENSG00000162631	NTNG1	protein_coding	chr1	108025821	108025827	108025821	108025828	+	1	0	AGO2	0	0	1	0	0	0	1	5
MIMAT0000103	hsa-miR-106a-5p	ENSG00000162631	NTNG1	protein_coding	chr1	108026070	108026075	108026070	108026075	+	1	0	AGO2	0	0	1	0	0	0	0	5
MIMAT0000231	hsa-miR-199a-5p	ENSG00000162631	NTNG1	protein_coding	chr1	108024438	108024443	108024422	108024444	+	1	0	AGO2	1	0	1	0	1	1	1	3
MIMAT0000232	hsa-miR-199a-3p	ENSG00000162631	NTNG1	protein_coding	chr1	108024186	108024192	108024186	108024192	+	1	0	AGO2	1	0	1	0	0	0	0	4
MIMAT0000243	hsa-miR-148a-3p	ENSG00000162631	NTNG1	protein_coding	chr1	108024068	108024089	108024068	108024089	+	1	0	AGO2	0	1	0	0	0	0	0	7
MIMAT0000244	hsa-miR-30c-5p	ENSG00000162631	NTNG1	protein_coding	chr1	108024353	108024375	108024353	108024375	+	1	0	AGO1-4	0	0	0	0	1	0	0	6
MIMAT0000245	hsa-miR-30d-5p	ENSG00000162631	NTNG1	protein_coding	chr1	108024354	108024375	108024354	108024375	+	1	0	AGO1-4	0	0	0	0	1	0	0	14
MIMAT0000251	hsa-miR-147a	ENSG00000162631	NTNG1	protein_coding	chr1	108023546	108023549	108023544	108023551	+	1	0	AGO2	2	0	2	0	0	0	0	0
MIMAT0000263	hsa-miR-199b-5p	ENSG00000162631	NTNG1	protein_coding	chr1	108024437	108024443	108024422	108024444	+	1	0	AGO2	1	0	1	0	1	0	1	0
MIMAT0000273	hsa-miR-216a-5p	ENSG00000162631	NTNG1	protein_coding	chr1	108024321	108024326	108024320	108024326	+	1	0	AGO1-4	1	0	1	0	0	0	1	3
MIMAT0000275	hsa-miR-218-5p	ENSG00000162631	NTNG1	protein_coding	chr1	108023628	108023633	108023628	108023633	+	1	0	AGO2	1	0	0	0	0	0	0	2
MIMAT0000280	hsa-miR-223-3p	ENSG00000162631	NTNG1	protein_coding	chr1	108024270	108024277	108024256	108024278	+	1	0	AGO1-4	1	0	0	0	1	0	0	3
MIMAT0000420	hsa-miR-30b-5p	ENSG00000162631	NTNG1	protein_coding	chr1	108024354	108024375	108024354	108024375	+	1	0	AGO1-4	0	0	0	0	1	0	0	7
MIMAT0000424	hsa-miR-128-3p	ENSG00000162631	NTNG1	protein_coding	chr1	108024311	108024318	108024299	108024319	+	1	0	AGO1-4	1	0	0	0	1	0	0	14
MIMAT0000427	hsa-miR-133a-3p	ENSG00000162631	NTNG1	protein_coding	chr1	108023848	108023854	108023834	108023855	+	1	0	AGO2	1	0	1	0	1	0	1	3
MIMAT0000428	hsa-miR-135a-5p	ENSG00000162631	NTNG1	protein_coding	chr1	108023604	108023610	108023587	108023611	+	1	0	AGO2	1	0	1	0	1	0	1	1
MIMAT0000436	hsa-miR-144-3p	ENSG00000162631	NTNG1	protein_coding	chr1	108024188	108024193	108024175	108024194	+	1	0	AGO2	1	0	0	0	1	0	0	5
MIMAT0000437	hsa-miR-145-5p	ENSG00000162631	NTNG1	protein_coding	chr1	108024439	108024444	108024424	108024445	+	1	0	AGO2	1	0	0	0	1	1	1	4
MIMAT0000441	hsa-miR-9-5p	ENSG00000162631	NTNG1	protein_coding	chr1	108024401	108024407	108024384	108024408	+	1	0	AGO2	1	0	1	0	1	1	1	5
MIMAT0000442	hsa-miR-9-3p	ENSG00000162631	NTNG1	protein_coding	chr1	108024431	108024437	108024431	108024437	+	1	0	AGO2	0	0	0	0	0	1	0	2
MIMAT0000450	hsa-miR-149-5p	ENSG00000162631	NTNG1	protein_coding	chr1	108024054	108024059	108024054	108024059	+	1	0	AGO2	1	0	0	0	0	0	0	5
MIMAT0000454	hsa-miR-184	ENSG00000162631	NTNG1	protein_coding	chr1	108023930	108023936	108023913	108023937	+	1	0	AGO2	1	0	1	0	1	0	0	2
MIMAT0000456	hsa-miR-186-5p	ENSG00000162631	NTNG1	protein_coding	chr1	108023864	108023870	108023848	108023871	+	1	0	AGO2	1	0	0	0	1	0	0	10
MIMAT0000459	hsa-miR-193a-3p	ENSG00000162631	NTNG1	protein_coding	chr1	108024055	108024060	108024055	108024060	+	1	0	AGO2	1	0	0	0	0	0	0	1
MIMAT0000680	hsa-miR-106b-5p	ENSG00000162631	NTNG1	protein_coding	chr1	108025821	108025827	108025821	108025828	+	1	0	AGO2	0	0	1	0	0	0	1	13
MIMAT0000680	hsa-miR-106b-5p	ENSG00000162631	NTNG1	protein_coding	chr1	108026070	108026075	108026070	108026075	+	1	0	AGO2	0	0	1	0	0	0	0	13
MIMAT0000692	hsa-miR-30e-5p	ENSG00000162631	NTNG1	protein_coding	chr1	108024354	108024375	108024354	108024375	+	1	0	AGO1-4	0	0	0	0	1	0	0	9
MIMAT0000707	hsa-miR-363-3p	ENSG00000162631	NTNG1	protein_coding	chr1	107691433	107691461	107691433	107691461	+	2	0	AGO2	0	0	0	1	0	0	0	3
MIMAT0000719	hsa-miR-367-3p	ENSG00000162631	NTNG1	protein_coding	chr1	107691433	107691461	107691433	107691461	+	2	0	AGO2	0	0	0	1	0	0	0	1
MIMAT0000732	hsa-miR-378a-3p	ENSG00000162631	NTNG1	protein_coding	chr1	107937889	107937910	107937889	107937910	+	1	0	AGO2	0	0	0	0	1	0	0	12
MIMAT0000732	hsa-miR-378a-3p	ENSG00000162631	NTNG1	protein_coding	chr1	108024076	108024096	108024074	108024096	+	1	0	AGO2	0	1	0	0	1	0	0	12
MIMAT0000755	hsa-miR-323a-3p	ENSG00000162631	NTNG1	protein_coding	chr1	108024245	108024250	108024245	108024250	+	1	0	AGO1-4	1	0	0	0	0	0	0	1
MIMAT0000758	hsa-miR-135b-5p	ENSG00000162631	NTNG1	protein_coding	chr1	108023604	108023610	108023587	108023611	+	1	0	AGO2	1	0	1	0	1	0	1	4
MIMAT0000763	hsa-miR-338-3p	ENSG00000162631	NTNG1	protein_coding	chr1	108024348	108024353	108024348	108024353	+	1	0	AGO1-4	1	0	0	0	0	0	0	8
MIMAT0000770	hsa-miR-133b	ENSG00000162631	NTNG1	protein_coding	chr1	108023848	108023854	108023834	108023855	+	1	0	AGO2	1	0	1	0	1	0	1	2
MIMAT0001339	hsa-miR-422a	ENSG00000162631	NTNG1	protein_coding	chr1	107937888	107937910	107937888	107937910	+	1	0	AGO2	0	0	0	0	1	0	0	0
MIMAT0001339	hsa-miR-422a	ENSG00000162631	NTNG1	protein_coding	chr1	108024074	108024096	108024074	108024096	+	1	0	AGO2	0	1	0	0	1	0	0	0
MIMAT0001413	hsa-miR-20b-5p	ENSG00000162631	NTNG1	protein_coding	chr1	108025821	108025827	108025821	108025828	+	1	0	AGO2	0	0	1	0	0	0	1	3
MIMAT0001413	hsa-miR-20b-5p	ENSG00000162631	NTNG1	protein_coding	chr1	108026070	108026075	108026070	108026075	+	1	0	AGO2	0	0	1	0	0	0	0	3
MIMAT0001629	hsa-miR-329-3p	ENSG00000162631	NTNG1	protein_coding	chr1	107937790	107937811	107937790	107937811	+	1	0	AGO2	0	0	0	0	1	0	0	1
MIMAT0001629	hsa-miR-329-3p	ENSG00000162631	NTNG1	protein_coding	chr1	108023842	108023847	108023842	108023847	+	1	0	AGO2	1	0	0	0	0	0	0	1
MIMAT0002807	hsa-miR-491-5p	ENSG00000162631	NTNG1	protein_coding	chr1	108023561	108023566	108023561	108023566	+	1	0	AGO2	1	0	1	0	0	0	0	3
MIMAT0002816	hsa-miR-494-3p	ENSG00000162631	NTNG1	protein_coding	chr1	108024307	108024312	108024293	108024313	+	1	0	AGO1-4	1	0	0	0	1	0	0	0
MIMAT0002817	hsa-miR-495-3p	ENSG00000162631	NTNG1	protein_coding	chr1	108024305	108024310	108024305	108024310	+	1	0	AGO1-4	1	0	1	0	0	0	0	0
MIMAT0002819	hsa-miR-193b-3p	ENSG00000162631	NTNG1	protein_coding	chr1	108024055	108024060	108024055	108024060	+	1	0	AGO2	1	0	0	0	0	0	0	11
MIMAT0002824	hsa-miR-498	ENSG00000162631	NTNG1	protein_coding	chr1	108024181	108024186	108024181	108024186	+	1	0	AGO2	1	0	0	0	0	0	0	2
MIMAT0002836	hsa-miR-526b-3p	ENSG00000162631	NTNG1	protein_coding	chr1	108025821	108025827	108025821	108025828	+	1	0	AGO2	0	0	1	0	0	0	1	0
MIMAT0002836	hsa-miR-526b-3p	ENSG00000162631	NTNG1	protein_coding	chr1	108026070	108026075	108026070	108026075	+	1	0	AGO2	0	0	1	0	0	0	0	0
MIMAT0002853	hsa-miR-519d-3p	ENSG00000162631	NTNG1	protein_coding	chr1	108025821	108025827	108025821	108025828	+	1	0	AGO2	0	0	1	0	0	0	1	2
MIMAT0002853	hsa-miR-519d-3p	ENSG00000162631	NTNG1	protein_coding	chr1	108026070	108026075	108026070	108026075	+	1	0	AGO2	0	0	1	0	0	0	0	2
MIMAT0003165	hsa-miR-545-3p	ENSG00000162631	NTNG1	protein_coding	chr1	108023868	108023874	108023868	108023874	+	1	0	AGO2	1	0	0	0	0	0	0	0
MIMAT0003218	hsa-miR-92b-3p	ENSG00000162631	NTNG1	protein_coding	chr1	107691433	107691461	107691433	107691461	+	2	0	AGO2	0	0	0	1	0	0	0	4
MIMAT0003244	hsa-miR-579-3p	ENSG00000162631	NTNG1	protein_coding	chr1	107867111	107867139	107867111	107867139	+	1	0	AGO2	0	0	0	1	0	0	0	2
MIMAT0003247	hsa-miR-582-5p	ENSG00000162631	NTNG1	protein_coding	chr1	108024189	108024194	108024189	108024194	+	1	0	AGO2	1	0	0	0	0	0	0	6
MIMAT0003880	hsa-miR-671-5p	ENSG00000162631	NTNG1	protein_coding	chr1	108023927	108023932	108023927	108023932	+	1	0	AGO2	1	0	0	0	0	0	0	11
MIMAT0004563	hsa-miR-199b-3p	ENSG00000162631	NTNG1	protein_coding	chr1	108024186	108024192	108024186	108024192	+	1	0	AGO2	1	0	1	0	0	0	0	4
MIMAT0004683	hsa-miR-362-3p	ENSG00000162631	NTNG1	protein_coding	chr1	107937790	107937811	107937790	107937811	+	1	0	AGO2	0	0	0	0	1	0	0	3
MIMAT0004683	hsa-miR-362-3p	ENSG00000162631	NTNG1	protein_coding	chr1	108023842	108023847	108023842	108023847	+	1	0	AGO2	1	0	0	0	0	0	0	3
MIMAT0004793	hsa-miR-556-3p	ENSG00000162631	NTNG1	protein_coding	chr1	108024388	108024393	108024388	108024393	+	1	0	AGO2	1	0	1	0	0	0	0	7
MIMAT0004809	hsa-miR-628-5p	ENSG00000162631	NTNG1	protein_coding	chr1	108024263	108024268	108024263	108024268	+	1	0	AGO1-4	1	0	0	0	0	0	0	5
MIMAT0004911	hsa-miR-874-3p	ENSG00000162631	NTNG1	protein_coding	chr1	108024335	108024340	108024335	108024341	+	1	0	AGO1-4	1	0	0	0	0	1	0	4
MIMAT0004921	hsa-miR-889-3p	ENSG00000162631	NTNG1	protein_coding	chr1	107691399	107691427	107691399	107691427	+	1	0	AGO2	0	0	0	1	0	0	0	0
MIMAT0004954	hsa-miR-543	ENSG00000162631	NTNG1	protein_coding	chr1	108024417	108024422	108024417	108024422	+	1	0	AGO2	1	0	0	0	0	0	0	0
MIMAT0004959	hsa-miR-216b-5p	ENSG00000162631	NTNG1	protein_coding	chr1	108024320	108024326	108024304	108024327	+	1	0	AGO1-4	1	0	0	0	1	1	1	1
MIMAT0005794	hsa-miR-1296-5p	ENSG00000162631	NTNG1	protein_coding	chr1	108023821	108023826	108023821	108023826	+	1	0	AGO2	1	0	0	0	0	0	0	3
MIMAT0005795	hsa-miR-1323	ENSG00000162631	NTNG1	protein_coding	chr1	108024303	108024308	108024303	108024308	+	1	0	AGO1-4	1	0	0	0	0	0	0	1
MIMAT0005919	hsa-miR-548o-3p	ENSG00000162631	NTNG1	protein_coding	chr1	108024303	108024308	108024303	108024308	+	1	0	AGO1-4	1	0	0	0	0	0	0	5
MIMAT0005930	hsa-miR-1276	ENSG00000162631	NTNG1	protein_coding	chr1	108024291	108024296	108024291	108024296	+	1	0	AGO1-4	1	0	0	0	0	0	0	5
MIMAT0005955	hsa-miR-1197	ENSG00000162631	NTNG1	protein_coding	chr1	108024287	108024292	108024287	108024292	+	1	0	AGO1-4	1	0	0	0	0	0	0	0
MIMAT0014992	hsa-miR-3129-5p	ENSG00000162631	NTNG1	protein_coding	chr1	108024186	108024192	108024186	108024192	+	1	0	AGO2	0	0	1	0	0	0	0	1
MIMAT0016847	hsa-miR-378c	ENSG00000162631	NTNG1	protein_coding	chr1	108024071	108024096	108024071	108024096	+	1	0	AGO2	0	1	0	0	0	0	0	8
MIMAT0017392	hsa-miR-3200-5p	ENSG00000162631	NTNG1	protein_coding	chr1	107691298	107691326	107691298	107691326	+	1	0	AGO2	0	0	0	1	0	0	0	1
MIMAT0018932	hsa-miR-378f	ENSG00000162631	NTNG1	protein_coding	chr1	108024076	108024096	108024076	108024096	+	1	0	AGO2	0	1	0	0	0	0	0	1
MIMAT0018984	hsa-miR-378h	ENSG00000162631	NTNG1	protein_coding	chr1	108024076	108024096	108024076	108024096	+	1	0	AGO2	0	1	0	0	0	0	0	0
MIMAT0019059	hsa-miR-1269b	ENSG00000162631	NTNG1	protein_coding	chr1	108024074	108024095	108024074	108024095	+	1	0	AGO2	0	1	0	0	0	0	0	1
MIMAT0019074	hsa-miR-378i	ENSG00000162631	NTNG1	protein_coding	chr1	108024075	108024096	108024075	108024096	+	1	0	AGO2	0	1	0	0	0	0	0	3
MIMAT0021127	hsa-miR-5195-3p	ENSG00000162631	NTNG1	protein_coding	chr1	108024439	108024445	108024439	108024445	+	1	0	AGO2	0	0	0	0	0	1	1	0
MIMAT0022272	hsa-miR-664b-3p	ENSG00000162631	NTNG1	protein_coding	chr1	107867111	107867139	107867111	107867139	+	1	0	AGO2	0	0	0	1	0	0	0	3
MIMAT0022479	hsa-miR-5688	ENSG00000162631	NTNG1	protein_coding	chr1	108024305	108024310	108024305	108024310	+	1	0	AGO1-4	0	0	1	0	0	0	0	1
MIMAT0025857	hsa-miR-892c-5p	ENSG00000162631	NTNG1	protein_coding	chr1	108023937	108023942	108023937	108023942	+	1	0	AGO2	0	0	1	0	0	0	0	0

## Sheet: NTNG2
miRNAid	miRNAname	geneID	geneName	geneType	chromosome	narrowStart	narrowEnd	broadStart	broadEnd	strand	clipExpNum	degraExpNum	RBP	PITA	RNA22	miRmap	microT	miRanda	PicTar	TargetScan	pancancerNum
MIMAT0000685	hsa-miR-34b-5p	ENSG00000196358	NTNG2	protein_coding	chr9	135119699	135119704	135119699	135119704	+	1	0	AGO1-4	0	0	1	0	0	0	0	2
MIMAT0010251	hsa-miR-449c-5p	ENSG00000196358	NTNG2	protein_coding	chr9	135119699	135119704	135119699	135119704	+	1	0	AGO1-4	0	0	1	0	0	0	0	1
MIMAT0013517	hsa-miR-2682-5p	ENSG00000196358	NTNG2	protein_coding	chr9	135119699	135119704	135119699	135119704	+	1	0	AGO1-4	0	0	1	0	0	0	0	2
MIMAT0019218	hsa-miR-3194-3p	ENSG00000196358	NTNG2	protein_coding	chr9	135119683	135119689	135119683	135119689	+	1	0	AGO1-4	0	0	1	0	0	0	0	1
