# Supplementary material for: The pan-cancer landscape of netrin family reveals potential oncogenic biomarkers
Source: Sci Rep. 2020 Mar 23;10:5224. doi: 10.1038/s41598-020-62117-5 (PMC7090012; doi:10.1038/s41598-020-62117-5)
Supplement: Supplementary file 10 — Dataset 10. [file 41598_2020_62117_MOESM10_ESM.xlsx]

## Sheet: Title Page
The pan-cancer landscape of netrin family reveals potential oncogenic biomarkers
Wenjun Hao1,8, Meng Yu2,8, Jiaxing Lin3, Bitian Liu4, Haotian Xing3, Jieping Yang3, Dan Sun3, Feilong Chen3, Mingzhe Jiang3, Chaozhi Tang3, Xizhe Zhang5,6, Yongkang Zhao6,7 and Yuyan Zhu3,7*
1.Department of Urology, The First Affiliated Hospital of Dalian Medical University, Dalian 116011, China
2.Department of Reproductive Biology and Transgenic Animal, China Medical University, Shenyang 110001, China
3.Department of Urology, The First Affiliated Hospital of China Medical University, Shenyang 110001, China
4.Department of Urology, The Second Affiliated Hospital of China Medical University, Shenyang 110001, China
5.School of Computer Science and Engineering, Northeastern University, Shenyang, Liaoning, China
6.National Institute of Health and Medical Big Data, China Medical University, Shenyang, Liaoning, China
7.Joint Laboratory of Artificial Intelligence and Precision Medicine of China Medical University and Northeastern University, Northeastern University, Shenyang, Liaoning, China
8.These authors contributed equally
* Corresponding author: Yuyan Zhu, e-mail: yyzhu@cmu.edu.cn

## Sheet: NTN1
Cancer type	SNP ID	SNP position (hg19)	Alleles (A/a)	Gene symbol	Gene position (hg19)	Beta	t-stat	p-valule		Cancer type	eQTL type	tagSNP	LD	SNP ID	SNP position (hg19)	Gene symbol	Gene position (hg19)	Beta	t-stat	p-value	GWAS-Traits
KIRP	rs12450515	chr17:9632247	C/T	NTN1	chr17:8924859-9147317:+	0.54	3.82	0.000167		THCA	cis	rs3027234	0.47	rs1150	chr17:8062583	NTN1	chr17:8924859-9147316:+	-0.17	-3.45	0.000604	Telomere length
KIRP	rs9889256	chr17:9630887	C/A	NTN1	chr17:8924859-9147317:+	-0.63	-3.96	9.46e-05		THCA	cis	rs3027234	0.47	rs11650713	chr17:8076916	NTN1	chr17:8924859-9147316:+	-0.17	-3.52	0.000471	Telomere length
KIRP	rs9896300	chr17:9630915	A/G	NTN1	chr17:8924859-9147317:+	-0.58	-3.83	0.000157		THCA	cis	rs3027234	0.47	rs2278637	chr17:8062102	NTN1	chr17:8924859-9147316:+	-0.17	-3.39	0.000751	Telomere length
LIHC	rs7214680	chr17:9786885	A/C	NTN1	chr17:8924859-9147317:+	0.48	4.05	6.25e-05		THCA	cis	rs3027234	0.387	rs2304909	chr17:8066107	NTN1	chr17:8924859-9147316:+	-0.17	-3.51	0.000497	Telomere length
LIHC	rs7216356	chr17:8932232	A/G	NTN1	chr17:8924859-9147317:+	0.37	4.6	6e-06		THCA	cis	rs3027234	0.434	rs4791618	chr17:8102415	NTN1	chr17:8924859-9147316:+	-0.18	-3.61	0.000341	Telomere length
LIHC	rs7220263	chr17:9763841	A/G	NTN1	chr17:8924859-9147317:+	0.55	4.65	4.65e-06		THCA	cis	rs3027247	0.705	rs77224069	chr17:8124268	NTN1	chr17:8924859-9147316:+	0.21	3.37	0.000816	Parkinson's disease (motor and cognition)
LUSC	rs9892698	chr17:9067815	G/A	NTN1	chr17:8924859-9147317:+	0.31	4.64	4.54e-06		THCA	cis	rs3027234	0.354	rs8064449	chr17:8079029	NTN1	chr17:8924859-9147316:+	-0.17	-3.43	0.000647	Telomere length
LUSC	rs9892706	chr17:9067115	C/T	NTN1	chr17:8924859-9147317:+	0.32	4.7	3.43e-06		THCA	cis	rs3027234	0.356	rs8066511	chr17:8066433	NTN1	chr17:8924859-9147316:+	-0.17	-3.44	0.000622	Telomere length
LUSC	rs9893693	chr17:9069446	G/A	NTN1	chr17:8924859-9147317:+	0.29	4.5	8.65e-06		THCA	cis	rs3027234	0.47	rs8067606	chr17:8066783	NTN1	chr17:8924859-9147316:+	-0.17	-3.43	0.000656	Telomere length
LUSC	rs9899596	chr17:9068420	G/A	NTN1	chr17:8924859-9147317:+	0.29	4.52	7.94e-06		THCA	cis	rs3027234	0.47	rs8069739	chr17:8078765	NTN1	chr17:8924859-9147316:+	-0.17	-3.4	0.000731	Telomere length
LUSC	rs9899630	chr17:9068448	A/G	NTN1	chr17:8924859-9147317:+	-0.28	-4.44	1.1e-05		THCA	cis	rs3027234	0.47	rs959303	chr17:8062199	NTN1	chr17:8924859-9147316:+	-0.17	-3.42	0.000672	Telomere length
LUSC	rs9901968	chr17:9070646	G/A	NTN1	chr17:8924859-9147317:+	0.28	4.27	2.33e-05		THCA	cis	rs3027234	0.433	rs9891949	chr17:8099183	NTN1	chr17:8924859-9147316:+	0.17	3.46	0.000599	Telomere length
PRAD	rs11393526	chr17:8933307	C/CA	NTN1	chr17:8924859-9147317:+	-0.11	-3.65	0.000293		THCA	cis	rs3027234	0.47	rs9894790	chr17:8076778	NTN1	chr17:8924859-9147316:+	-0.17	-3.47	0.000575	Telomere length
PRAD	rs7208515	chr17:8933343	A/T	NTN1	chr17:8924859-9147317:+	-0.1	-3.55	0.00042		THCA	cis	rs3027234	0.402	rs9899533	chr17:8068045	NTN1	chr17:8924859-9147316:+	-0.17	-3.55	0.000416	Telomere length
PRAD	rs7223668	chr17:8933194	A/G	NTN1	chr17:8924859-9147317:+	-0.12	-4.01	7e-05		THCA	cis	rs3027234	0.372	rs9901637	chr17:8076802	NTN1	chr17:8924859-9147316:+	-0.17	-3.52	0.000474	Telomere length
THCA	rs1150	chr17:8062583	A/G	NTN1	chr17:8924859-9147317:+	-0.17	-3.45	0.000604
THCA	rs11650713	chr17:8076916	C/T	NTN1	chr17:8924859-9147317:+	-0.17	-3.52	0.000471
THCA	rs11656359	chr17:8069021	T/C	NTN1	chr17:8924859-9147317:+	-0.17	-3.45	0.000602
THCA	rs143118603	chr17:8066536	GC/G	NTN1	chr17:8924859-9147317:+	-0.17	-3.44	0.000622
THCA	rs2278637	chr17:8062102	G/T	NTN1	chr17:8924859-9147317:+	-0.17	-3.39	0.000751
THCA	rs2304909	chr17:8066107	G/A	NTN1	chr17:8924859-9147317:+	-0.17	-3.51	0.000497
THCA	rs3760516	chr17:8068921	G/C	NTN1	chr17:8924859-9147317:+	-0.18	-3.62	0.000326
THCA	rs3926608	chr17:9674077	A/G	NTN1	chr17:8924859-9147317:+	0.24	3.34	0.000893
THCA	rs4791618	chr17:8102415	A/G	NTN1	chr17:8924859-9147317:+	-0.18	-3.61	0.000341
THCA	rs4792267	chr17:8061337	G/A	NTN1	chr17:8924859-9147317:+	-0.17	-3.42	0.000672
THCA	rs55690112	chr17:8068755	CTTT/C	NTN1	chr17:8924859-9147317:+	-0.17	-3.51	0.000482
THCA	rs6503089	chr17:8073296	T/C	NTN1	chr17:8924859-9147317:+	-0.17	-3.37	0.000825
THCA	rs77224069	chr17:8124268	G/C	NTN1	chr17:8924859-9147317:+	0.21	3.37	0.000816
THCA	rs8064449	chr17:8079029	C/G	NTN1	chr17:8924859-9147317:+	-0.17	-3.43	0.000647
THCA	rs8066511	chr17:8066433	C/T	NTN1	chr17:8924859-9147317:+	-0.17	-3.44	0.000622
THCA	rs8066513	chr17:8066441	C/T	NTN1	chr17:8924859-9147317:+	-0.17	-3.44	0.000622
THCA	rs8067606	chr17:8066783	A/G	NTN1	chr17:8924859-9147317:+	-0.17	-3.43	0.000656
THCA	rs8069739	chr17:8078765	A/G	NTN1	chr17:8924859-9147317:+	-0.17	-3.4	0.000731
THCA	rs959303	chr17:8062199	C/T	NTN1	chr17:8924859-9147317:+	-0.17	-3.42	0.000672
THCA	rs9891949	chr17:8099183	A/G	NTN1	chr17:8924859-9147317:+	0.17	3.46	0.000599
THCA	rs9894148	chr17:8076166	A/G	NTN1	chr17:8924859-9147317:+	-0.17	-3.41	0.000705
THCA	rs9894790	chr17:8076778	C/T	NTN1	chr17:8924859-9147317:+	-0.17	-3.47	0.000575
THCA	rs9899533	chr17:8068045	C/G	NTN1	chr17:8924859-9147317:+	-0.17	-3.55	0.000416
THCA	rs9901637	chr17:8076802	T/A	NTN1	chr17:8924859-9147317:+	-0.17	-3.52	0.000474

## Sheet: NTN3
Cancer type	SNP ID	SNP position (hg19)	Alleles (A/a)	Gene symbol	Gene position (hg19)	Beta	t-stat	p-valule
LGG	rs17525883	chr16:3508012	A/C	NTN3	chr16:2521500-2524146:+	0.35	3.57	0.000394

## Sheet: NTN4
Cancer type	SNP ID	SNP position (hg19)	Alleles (A/a)	Gene symbol	Gene position (hg19)	Beta	t-stat	p-valule		Cancer type	eQTL type	tagSNP	LD	SNP ID	SNP position (hg19)	Gene symbol	Gene position (hg19)	Beta	t-stat	p-value	GWAS-Traits
HNSC	rs7975425	chr12:96181865	G/A	NTN4	chr12:96051583-96184930:-	0.17	3.66	0.00028		LUAD	cis	rs6538678	0.437	rs10735335	chr12:96263437	NTN4	chr12:96051584-96184930:-	0.22	4.79	2.17e-06	Lupus nephritis in systemic lupus erythematosus
KIRC	rs10507059	chr12:96105834	C/T	NTN4	chr12:96051583-96184930:-	-0.24	-4.32	1.85e-05		LUAD	cis	rs6538678	0.396	rs4762250	chr12:96278146	NTN4	chr12:96051584-96184930:-	0.25	5.36	1.27e-07	Lupus nephritis in systemic lupus erythematosus
KIRC	rs1054922	chr12:96252052	G/C	NTN4	chr12:96051583-96184930:-	-0.18	-3.52	0.000469		LUAD	cis	rs6538678	0.408	rs6538677	chr12:96254528	NTN4	chr12:96051584-96184930:-	0.24	5.13	4.24e-07	Lupus nephritis in systemic lupus erythematosus
KIRC	rs10859925	chr12:96094206	G/A	NTN4	chr12:96051583-96184930:-	-0.27	-4.73	2.87e-06		LUAD	cis	rs6538678	0.415	rs76152842	chr12:96231218	NTN4	chr12:96051584-96184930:-	0.22	4.66	4.1e-06	Lupus nephritis in systemic lupus erythematosus
KIRC	rs11108202	chr12:96100250	G/A	NTN4	chr12:96051583-96184930:-	-0.24	-4.41	1.24e-05		LUAD	cis	rs6538678	0.409	rs7957346	chr12:96260474	NTN4	chr12:96051584-96184930:-	0.22	4.84	1.75e-06	Lupus nephritis in systemic lupus erythematosus
KIRC	rs11108210	chr12:96112433	C/T	NTN4	chr12:96051583-96184930:-	-0.28	-5.17	3.46e-07
KIRC	rs11108216	chr12:96119080	G/T	NTN4	chr12:96051583-96184930:-	-0.23	-3.97	8.34e-05
KIRC	rs11108218	chr12:96121542	G/C	NTN4	chr12:96051583-96184930:-	-0.21	-3.77	0.000185
KIRC	rs11108219	chr12:96121902	T/C	NTN4	chr12:96051583-96184930:-	-0.22	-3.89	0.000112
KIRC	rs11108238	chr12:96153754	G/T	NTN4	chr12:96051583-96184930:-	-0.19	-3.69	0.000251
KIRC	rs11108239	chr12:96154122	C/G	NTN4	chr12:96051583-96184930:-	-0.2	-3.75	0.000195
KIRC	rs11612901	chr12:96221318	T/C	NTN4	chr12:96051583-96184930:-	-0.2	-3.91	0.000103
KIRC	rs12372014	chr12:96124893	T/C	NTN4	chr12:96051583-96184930:-	-0.21	-3.71	0.000226
KIRC	rs12423171	chr12:96091058	A/G	NTN4	chr12:96051583-96184930:-	-0.23	-4.18	3.41e-05
KIRC	rs12426965	chr12:96094634	G/A	NTN4	chr12:96051583-96184930:-	-0.26	-4.71	3.26e-06
KIRC	rs12817330	chr12:96151369	C/T	NTN4	chr12:96051583-96184930:-	-0.19	-3.68	0.000258
KIRC	rs12819215	chr12:96269514	C/T	NTN4	chr12:96051583-96184930:-	0.18	3.63	0.000313
KIRC	rs12824729	chr12:96103229	A/G	NTN4	chr12:96051583-96184930:-	0.24	4.29	2.18e-05
KIRC	rs12833182	chr12:96153441	T/C	NTN4	chr12:96051583-96184930:-	-0.19	-3.73	0.00021
KIRC	rs142859622	chr12:96147518	C/T	NTN4	chr12:96051583-96184930:-	-0.19	-3.61	0.000342
KIRC	rs17286390	chr12:96091353	A/T	NTN4	chr12:96051583-96184930:-	0.21	3.77	0.000179
KIRC	rs17287370	chr12:96111118	C/T	NTN4	chr12:96051583-96184930:-	0.26	4.83	1.84e-06
KIRC	rs17290272	chr12:96206916	T/C	NTN4	chr12:96051583-96184930:-	-0.2	-3.83	0.000144
KIRC	rs17370432	chr12:96270563	G/T	NTN4	chr12:96051583-96184930:-	-0.18	-3.57	0.00039
KIRC	rs35151481	chr12:96211635	G/C	NTN4	chr12:96051583-96184930:-	-0.2	-3.82	0.000151
KIRC	rs35202071	chr12:96145829	C/T	NTN4	chr12:96051583-96184930:-	-0.19	-3.62	0.000328
KIRC	rs35211087	chr12:96244244	C/T	NTN4	chr12:96051583-96184930:-	-0.19	-3.62	0.000328
KIRC	rs35886064	chr12:96151047	G/A	NTN4	chr12:96051583-96184930:-	-0.19	-3.74	0.000206
KIRC	rs4077227	chr12:96108212	C/T	NTN4	chr12:96051583-96184930:-	-0.25	-4.68	3.66e-06
KIRC	rs56083326	chr12:96241380	T/C	NTN4	chr12:96051583-96184930:-	-0.19	-3.66	0.000284
KIRC	rs61046428	chr12:96265459	G/GAGTGAATGTTGAGGAAT	NTN4	chr12:96051583-96184930:-	-0.18	-3.58	0.000372
KIRC	rs71833659	chr12:96271072	TACAC/T	NTN4	chr12:96051583-96184930:-	-0.18	-3.57	0.00039
KIRC	rs7309423	chr12:96097147	T/C	NTN4	chr12:96051583-96184930:-	-0.25	-4.48	9.07e-06
KIRC	rs73225784	chr12:96225034	T/C	NTN4	chr12:96051583-96184930:-	-0.2	-3.82	0.000151
LAML	rs10859974	chr12:96288860	A/G	NTN4	chr12:96051583-96184930:-	0.48	4.24	4.98e-05
LGG	rs6538680	chr12:96284254	C/T	NTN4	chr12:96051583-96184930:-	0.3	3.5	0.000515
LUAD	rs10507066	chr12:96272642	A/T	NTN4	chr12:96051583-96184930:-	0.23	3.84	0.000137
LUAD	rs10507067	chr12:96273291	A/T	NTN4	chr12:96051583-96184930:-	-0.25	-3.99	7.53e-05
LUAD	rs10735335	chr12:96263437	G/A	NTN4	chr12:96051583-96184930:-	0.22	4.79	2.17e-06
LUAD	rs10777734	chr12:96164388	C/T	NTN4	chr12:96051583-96184930:-	0.2	4.25	2.52e-05
LUAD	rs10777735	chr12:96164510	G/A	NTN4	chr12:96051583-96184930:-	0.19	3.91	0.000104
LUAD	rs10859946	chr12:96167626	C/G	NTN4	chr12:96051583-96184930:-	-0.19	-3.99	7.77e-05
LUAD	rs11108323	chr12:96293421	A/G	NTN4	chr12:96051583-96184930:-	-0.3	-4.11	4.72e-05
LUAD	rs11108324	chr12:96293435	A/G	NTN4	chr12:96051583-96184930:-	-0.31	-4.15	3.85e-05
LUAD	rs11108330	chr12:96303060	A/G	NTN4	chr12:96051583-96184930:-	-0.3	-4.09	5.1e-05
LUAD	rs11108333	chr12:96311367	C/T	NTN4	chr12:96051583-96184930:-	-0.29	-3.99	7.65e-05
LUAD	rs111986490	chr12:96259973	A/G	NTN4	chr12:96051583-96184930:-	-0.31	-3.7	0.00024
LUAD	rs112522084	chr12:96224127	C/A	NTN4	chr12:96051583-96184930:-	-0.26	-4.09	4.94e-05
LUAD	rs112834242	chr12:96219404	C/T	NTN4	chr12:96051583-96184930:-	-0.27	-4.16	3.79e-05
LUAD	rs11317462	chr12:96174828	CA/C	NTN4	chr12:96051583-96184930:-	0.19	3.91	0.000105
LUAD	rs115309605	chr12:96305724	C/A	NTN4	chr12:96051583-96184930:-	-0.3	-4.09	5.1e-05
LUAD	rs12366845	chr12:96307967	G/C	NTN4	chr12:96051583-96184930:-	-0.3	-4.15	3.92e-05
LUAD	rs12367845	chr12:96310623	C/G	NTN4	chr12:96051583-96184930:-	-0.29	-4.06	5.82e-05
LUAD	rs12369602	chr12:96310590	T/G	NTN4	chr12:96051583-96184930:-	-0.29	-4.04	6.27e-05
LUAD	rs12371193	chr12:96287770	G/A	NTN4	chr12:96051583-96184930:-	-0.29	-3.74	0.000206
LUAD	rs12582529	chr12:96164721	C/T	NTN4	chr12:96051583-96184930:-	0.18	3.74	0.000204
LUAD	rs12827484	chr12:96244473	A/G	NTN4	chr12:96051583-96184930:-	-0.24	-3.94	9.53e-05
LUAD	rs1369821	chr12:96199494	T/C	NTN4	chr12:96051583-96184930:-	-0.26	-4.01	6.98e-05
LUAD	rs138819462	chr12:96268953	TG/T	NTN4	chr12:96051583-96184930:-	-0.26	-4.08	5.3e-05
LUAD	rs142067399	chr12:96263453	TTAAAGG/T	NTN4	chr12:96051583-96184930:-	-0.26	-4.12	4.52e-05
LUAD	rs143342382	chr12:96172094	C/G	NTN4	chr12:96051583-96184930:-	0.19	3.95	8.92e-05
LUAD	rs143803582	chr12:96303435	AC/A	NTN4	chr12:96051583-96184930:-	-0.3	-4.09	5.1e-05
LUAD	rs144923525	chr12:96217578	TA/T	NTN4	chr12:96051583-96184930:-	-0.26	-4.11	4.67e-05
LUAD	rs147203766	chr12:96311489	AAAAT/A	NTN4	chr12:96051583-96184930:-	-0.29	-4.01	7.14e-05
LUAD	rs1561091	chr12:96197201	G/T	NTN4	chr12:96051583-96184930:-	-0.21	-3.87	0.000124
LUAD	rs17289784	chr12:96196642	C/T	NTN4	chr12:96051583-96184930:-	-0.24	-3.76	0.000188
LUAD	rs17368197	chr12:96196672	G/T	NTN4	chr12:96051583-96184930:-	-0.27	-4.41	1.29e-05
LUAD	rs17368365	chr12:96199882	T/C	NTN4	chr12:96051583-96184930:-	-0.26	-4.01	6.98e-05
LUAD	rs17368782	chr12:96212513	G/A	NTN4	chr12:96051583-96184930:-	-0.25	-3.99	7.48e-05
LUAD	rs17369879	chr12:96257866	C/G	NTN4	chr12:96051583-96184930:-	-0.27	-4.37	1.53e-05
LUAD	rs17369927	chr12:96259951	G/A	NTN4	chr12:96051583-96184930:-	-0.26	-4.17	3.65e-05
LUAD	rs17370487	chr12:96272463	G/A	NTN4	chr12:96051583-96184930:-	-0.26	-4.11	4.72e-05
LUAD	rs184921806	chr12:96302085	G/C	NTN4	chr12:96051583-96184930:-	-0.29	-3.92	0.0001
LUAD	rs1865737	chr12:96215828	A/C	NTN4	chr12:96051583-96184930:-	-0.26	-4.13	4.22e-05
LUAD	rs200200831	chr12:96172124	A/C	NTN4	chr12:96051583-96184930:-	0.19	3.95	8.92e-05
LUAD	rs2367573	chr12:96210763	G/T	NTN4	chr12:96051583-96184930:-	-0.26	-4	7.32e-05
LUAD	rs35053512	chr12:96223776	A/C	NTN4	chr12:96051583-96184930:-	-0.25	-4.1	4.87e-05
LUAD	rs35352799	chr12:96228535	CAA/C	NTN4	chr12:96051583-96184930:-	-0.27	-4.4	1.31e-05
LUAD	rs371248119	chr12:96206476	TACAA/T	NTN4	chr12:96051583-96184930:-	-0.25	-3.98	7.97e-05
LUAD	rs373462305	chr12:96263119	CAG/C	NTN4	chr12:96051583-96184930:-	-0.31	-3.73	0.000211
LUAD	rs3886709	chr12:96246814	T/A	NTN4	chr12:96051583-96184930:-	-0.26	-4.1	4.8e-05
LUAD	rs4341611	chr12:96165780	T/C	NTN4	chr12:96051583-96184930:-	0.18	3.77	0.000185
LUAD	rs4533108	chr12:96168405	G/A	NTN4	chr12:96051583-96184930:-	0.19	3.97	8.27e-05
LUAD	rs4590950	chr12:96176983	C/G	NTN4	chr12:96051583-96184930:-	0.19	3.98	7.97e-05
LUAD	rs4762250	chr12:96278146	A/G	NTN4	chr12:96051583-96184930:-	0.25	5.36	1.27e-07
LUAD	rs55641641	chr12:96203900	C/G	NTN4	chr12:96051583-96184930:-	-0.26	-4.03	6.58e-05
LUAD	rs55873984	chr12:96204537	G/A	NTN4	chr12:96051583-96184930:-	-0.25	-3.9	0.000108
LUAD	rs55971426	chr12:96204536	A/G	NTN4	chr12:96051583-96184930:-	-0.25	-3.9	0.000108
LUAD	rs55980325	chr12:96257638	G/A	NTN4	chr12:96051583-96184930:-	-0.27	-4.2	3.21e-05
LUAD	rs56198015	chr12:96226006	G/A	NTN4	chr12:96051583-96184930:-	-0.25	-4.06	5.8e-05
LUAD	rs56243500	chr12:96200688	A/G	NTN4	chr12:96051583-96184930:-	-0.26	-4.01	6.98e-05
LUAD	rs56261928	chr12:96222640	T/C	NTN4	chr12:96051583-96184930:-	-0.27	-4.2	3.17e-05
LUAD	rs56310204	chr12:96222401	T/G	NTN4	chr12:96051583-96184930:-	-0.27	-4.2	3.17e-05
LUAD	rs56360325	chr12:96280385	A/T	NTN4	chr12:96051583-96184930:-	-0.25	-4.05	5.99e-05
LUAD	rs59806652	chr12:96309404	AG/A	NTN4	chr12:96051583-96184930:-	-0.29	-4.06	5.82e-05
LUAD	rs6538677	chr12:96254528	A/G	NTN4	chr12:96051583-96184930:-	0.24	5.13	4.24e-07
LUAD	rs7134361	chr12:96175090	T/A	NTN4	chr12:96051583-96184930:-	0.21	4.32	1.89e-05
LUAD	rs72225862	chr12:96275107	TTATA/T	NTN4	chr12:96051583-96184930:-	-0.26	-4.05	5.86e-05
LUAD	rs728675	chr12:96210292	T/A	NTN4	chr12:96051583-96184930:-	-0.26	-4	7.32e-05
LUAD	rs7303360	chr12:96174946	A/G	NTN4	chr12:96051583-96184930:-	0.19	3.91	0.000105
LUAD	rs7303901	chr12:96175327	A/C	NTN4	chr12:96051583-96184930:-	0.19	3.96	8.62e-05
LUAD	rs7308791	chr12:96169383	G/A	NTN4	chr12:96051583-96184930:-	0.19	3.98	8.07e-05
LUAD	rs74344617	chr12:96281510	G/A	NTN4	chr12:96051583-96184930:-	-0.26	-4.07	5.38e-05
LUAD	rs74346145	chr12:96280190	C/T	NTN4	chr12:96051583-96184930:-	-0.3	-3.7	0.000238
LUAD	rs74804635	chr12:96302793	G/A	NTN4	chr12:96051583-96184930:-	-0.3	-4.09	5.1e-05
LUAD	rs74994377	chr12:96297773	A/G	NTN4	chr12:96051583-96184930:-	-0.3	-4.09	4.97e-05
LUAD	rs75081992	chr12:96244337	T/C	NTN4	chr12:96051583-96184930:-	-0.26	-4.08	5.2e-05
LUAD	rs75649233	chr12:96231458	T/G	NTN4	chr12:96051583-96184930:-	-0.27	-4.26	2.44e-05
LUAD	rs75717488	chr12:96307771	A/T	NTN4	chr12:96051583-96184930:-	-0.3	-4.15	3.92e-05
LUAD	rs75959092	chr12:96292170	C/G	NTN4	chr12:96051583-96184930:-	-0.29	-3.89	0.000113
LUAD	rs76002053	chr12:96271257	G/T	NTN4	chr12:96051583-96184930:-	-0.26	-4.16	3.73e-05
LUAD	rs76022612	chr12:96307223	C/T	NTN4	chr12:96051583-96184930:-	-0.3	-4.07	5.56e-05
LUAD	rs76041874	chr12:96303483	A/G	NTN4	chr12:96051583-96184930:-	-0.3	-4.09	5.1e-05
LUAD	rs76152842	chr12:96231218	C/T	NTN4	chr12:96051583-96184930:-	0.22	4.66	4.1e-06
LUAD	rs76240639	chr12:96306264	G/T	NTN4	chr12:96051583-96184930:-	-0.3	-4.07	5.55e-05
LUAD	rs76362970	chr12:96193112	A/G	NTN4	chr12:96051583-96184930:-	-0.25	-3.92	0.000101
LUAD	rs76889398	chr12:96239064	C/G	NTN4	chr12:96051583-96184930:-	-0.26	-4.06	5.69e-05
LUAD	rs77369040	chr12:96239211	G/A	NTN4	chr12:96051583-96184930:-	-0.26	-4.06	5.75e-05
LUAD	rs77751297	chr12:96247258	G/T	NTN4	chr12:96051583-96184930:-	-0.28	-4.03	6.46e-05
LUAD	rs77823761	chr12:96205704	C/T	NTN4	chr12:96051583-96184930:-	-0.25	-3.97	8.2e-05
LUAD	rs78274733	chr12:96307710	C/A	NTN4	chr12:96051583-96184930:-	-0.3	-4.15	3.92e-05
LUAD	rs78593820	chr12:96307006	C/T	NTN4	chr12:96051583-96184930:-	-0.3	-4.04	6.13e-05
LUAD	rs78633929	chr12:96278208	T/G	NTN4	chr12:96051583-96184930:-	-0.26	-4.09	5.03e-05
LUAD	rs78744368	chr12:96295051	T/C	NTN4	chr12:96051583-96184930:-	-0.3	-4.11	4.6e-05
LUAD	rs79040951	chr12:96205600	C/G	NTN4	chr12:96051583-96184930:-	-0.25	-3.97	8.2e-05
LUAD	rs79398728	chr12:96274089	G/C	NTN4	chr12:96051583-96184930:-	-0.26	-4.09	4.99e-05
LUAD	rs7957223	chr12:96172345	G/A	NTN4	chr12:96051583-96184930:-	0.19	3.96	8.64e-05
LUAD	rs7957346	chr12:96260474	C/A	NTN4	chr12:96051583-96184930:-	0.22	4.84	1.75e-06
LUAD	rs7966680	chr12:96310417	G/T	NTN4	chr12:96051583-96184930:-	-0.29	-4.06	5.82e-05
LUAD	rs7972901	chr12:96176293	C/G	NTN4	chr12:96051583-96184930:-	0.19	4	7.37e-05
LUAD	rs79760173	chr12:96289935	C/T	NTN4	chr12:96051583-96184930:-	-0.29	-3.89	0.000113
LUAD	rs79819718	chr12:96256700	A/G	NTN4	chr12:96051583-96184930:-	-0.27	-4.19	3.35e-05
LUAD	rs79926260	chr12:96303575	A/G	NTN4	chr12:96051583-96184930:-	-0.3	-4.07	5.55e-05
LUAD	rs79962376	chr12:96307776	G/A	NTN4	chr12:96051583-96184930:-	-0.3	-4.15	3.92e-05
LUAD	rs80015123	chr12:96305196	C/A	NTN4	chr12:96051583-96184930:-	-0.3	-4.09	5.1e-05
LUAD	rs80095440	chr12:96296101	T/C	NTN4	chr12:96051583-96184930:-	-0.3	-4.09	4.97e-05
LUAD	rs80156312	chr12:96250818	A/T	NTN4	chr12:96051583-96184930:-	-0.26	-4.09	5.11e-05
LUAD	rs80203744	chr12:96284317	G/A	NTN4	chr12:96051583-96184930:-	-0.29	-4.08	5.27e-05
LUAD	rs80218908	chr12:96239010	G/C	NTN4	chr12:96051583-96184930:-	-0.26	-4.06	5.69e-05
LUAD	rs80238186	chr12:96208984	C/T	NTN4	chr12:96051583-96184930:-	-0.26	-4	7.32e-05
LUAD	rs80247972	chr12:96270298	C/T	NTN4	chr12:96051583-96184930:-	-0.26	-4.18	3.45e-05
PCPG	rs10859902	chr12:95958963	A/C	NTN4	chr12:96051583-96184930:-	0.33	4.21	4.28e-05
PCPG	rs11108118	chr12:95961586	T/C	NTN4	chr12:96051583-96184930:-	0.3	4.13	6.01e-05
PCPG	rs7304640	chr12:95953692	T/A	NTN4	chr12:96051583-96184930:-	0.32	4.12	6.19e-05
SKCM	rs10859977	chr12:96299370	G/A	NTN4	chr12:96051583-96184930:-	0.48	4.68	1.18e-05
SKCM	rs4519161	chr12:96300884	C/T	NTN4	chr12:96051583-96184930:-	0.48	4.68	1.18e-05
SKCM	rs6538683	chr12:96297159	T/C	NTN4	chr12:96051583-96184930:-	0.48	4.68	1.18e-05

## Sheet: NTN5
Cancer type	SNP ID	SNP position (hg19)	Alleles (A/a)	Gene symbol	Gene position (hg19)	Beta	t-stat	p-valule		Cancer type	eQTL type	tagSNP	LD	SNP ID	SNP position (hg19)	Gene symbol	Gene position (hg19)	Beta	t-stat	p-value	GWAS-Traits
BRCA	rs11564511	chr19:48610449	G/GAACTGA	NTN5	chr19:49164664-49176338:-	0.14	3.44	0.0006		BRCA	cis	rs838147	0.505	rs1688264	chr19:49209560	NTN5	chr19:49164666-49176264:-	0.11	3.8	0.000154	Dietary macronutrient intake
BRCA	rs1688264	chr19:49209560	T/G	NTN5	chr19:49164664-49176338:-	0.11	3.8	0.000154		BRCA	cis	rs838147	0.507	rs1704773	chr19:49209566	NTN5	chr19:49164666-49176264:-	0.11	3.8	0.000154	Dietary macronutrient intake
BRCA	rs1704773	chr19:49209566	A/G	NTN5	chr19:49164664-49176338:-	0.11	3.8	0.000154		BRCA	cis	rs838147	0.534	rs2638280	chr19:49209318	NTN5	chr19:49164666-49176264:-	0.11	3.61	0.000324	Dietary macronutrient intake
BRCA	rs202228373	chr19:48610607	T/TAAAACA	NTN5	chr19:49164664-49176338:-	0.14	3.51	0.000472		BRCA	cis	rs8111500	0.793	rs2892233	chr19:49160255	NTN5	chr19:49164666-49176264:-	-0.1	-3.42	0.000649	Elevated serum carcinoembryonic antigen levels
BRCA	rs2548458	chr19:49209325	C/T	NTN5	chr19:49164664-49176338:-	0.11	3.62	0.000308		BRCA	cis	rs838147	0.378	rs492602	chr19:49206417	NTN5	chr19:49164666-49176264:-	0.11	3.84	0.000131	Dietary macronutrient intake
BRCA	rs2548459	chr19:49209339	T/C	NTN5	chr19:49164664-49176338:-	0.11	3.62	0.000308		BRCA	cis	rs838147	0.537	rs503279	chr19:49209010	NTN5	chr19:49164666-49176264:-	-0.12	-4.09	4.59e-05	Dietary macronutrient intake
BRCA	rs2638280	chr19:49209318	G/A	NTN5	chr19:49164664-49176338:-	0.11	3.61	0.000324		BRCA	cis	rs838147	0.537	rs504963	chr19:49208865	NTN5	chr19:49164666-49176264:-	0.12	3.96	7.85e-05	Dietary macronutrient intake
BRCA	rs28362844	chr19:49208344	AC/A	NTN5	chr19:49164664-49176338:-	0.11	3.79	0.000161		BRCA	cis	rs838147	0.508	rs507711	chr19:49208564	NTN5	chr19:49164666-49176264:-	0.11	3.91	9.99e-05	Dietary macronutrient intake
BRCA	rs2892233	chr19:49160255	G/A	NTN5	chr19:49164664-49176338:-	-0.1	-3.42	0.000649		BRCA	cis	rs838147	0.508	rs507766	chr19:49208543	NTN5	chr19:49164666-49176264:-	0.12	3.94	8.55e-05	Dietary macronutrient intake
BRCA	rs492602	chr19:49206417	A/G	NTN5	chr19:49164664-49176338:-	0.11	3.84	0.000131		BRCA	cis	rs838147	0.378	rs516246	chr19:49206172	NTN5	chr19:49164666-49176264:-	0.11	3.83	0.000137	Dietary macronutrient intake
BRCA	rs503279	chr19:49209010	C/T	NTN5	chr19:49164664-49176338:-	-0.12	-4.09	4.59e-05		BRCA	cis	rs838147	0.378	rs516316	chr19:49206145	NTN5	chr19:49164666-49176264:-	0.1	3.5	0.000492	Dietary macronutrient intake
BRCA	rs504963	chr19:49208865	G/A	NTN5	chr19:49164664-49176338:-	0.12	3.96	7.85e-05		BRCA	cis	rs601338	1	rs601338	chr19:49206674	NTN5	chr19:49164666-49176264:-	0.11	3.8	0.000156	Blood metabolite levels;Blood metabolite ratios
BRCA	rs506897	chr19:49208629	G/C	NTN5	chr19:49164664-49176338:-	0.12	3.96	8.07e-05		BRCA	cis	rs838147	0.537	rs632111	chr19:49208978	NTN5	chr19:49164666-49176264:-	0.12	4.19	2.98e-05	Dietary macronutrient intake
BRCA	rs507711	chr19:49208564	C/T	NTN5	chr19:49164664-49176338:-	0.11	3.91	9.99e-05		BRCA	cis	rs838147	0.479	rs633372	chr19:49209226	NTN5	chr19:49164666-49176264:-	0.11	3.76	0.000178	Dietary macronutrient intake
BRCA	rs507766	chr19:49208543	T/C	NTN5	chr19:49164664-49176338:-	0.12	3.94	8.55e-05		BRCA	cis	rs838147	0.378	rs679574	chr19:49206108	NTN5	chr19:49164666-49176264:-	0.11	3.79	0.000156	Dietary macronutrient intake
BRCA	rs507855	chr19:49208501	A/G	NTN5	chr19:49164664-49176338:-	0.11	3.78	0.000167		BRCA	cis	rs838147	0.378	rs681343	chr19:49206462	NTN5	chr19:49164666-49176264:-	0.11	3.84	0.000128	Dietary macronutrient intake
BRCA	rs516246	chr19:49206172	C/T	NTN5	chr19:49164664-49176338:-	0.11	3.83	0.000137		BRCA	cis	rs838147	0.507	rs692854	chr19:49209464	NTN5	chr19:49164666-49176264:-	0.12	3.96	7.85e-05	Dietary macronutrient intake
BRCA	rs516316	chr19:49206145	C/G	NTN5	chr19:49164664-49176338:-	0.1	3.5	0.000492		BRCA	cis	rs8111500	0.793	rs8103121	chr19:49158138	NTN5	chr19:49164666-49176264:-	0.11	3.53	0.000427	Elevated serum carcinoembryonic antigen levels
BRCA	rs601338	chr19:49206674	G/A	NTN5	chr19:49164664-49176338:-	0.11	3.8	0.000156		KIRC	cis	rs838147	0.505	rs1688264	chr19:49209560	NTN5	chr19:49164666-49176264:-	0.17	4.51	8.12e-06	Dietary macronutrient intake
BRCA	rs62130318	chr19:49157135	G/A	NTN5	chr19:49164664-49176338:-	-0.1	-3.41	0.000681		KIRC	cis	rs838147	0.507	rs1704773	chr19:49209566	NTN5	chr19:49164666-49176264:-	0.17	4.51	8.12e-06	Dietary macronutrient intake
BRCA	rs62130319	chr19:49157255	C/T	NTN5	chr19:49164664-49176338:-	-0.1	-3.4	0.000703		KIRC	cis	rs838147	0.534	rs2638280	chr19:49209318	NTN5	chr19:49164666-49176264:-	0.18	4.55	6.63e-06	Dietary macronutrient intake
BRCA	rs632111	chr19:49208978	A/G	NTN5	chr19:49164664-49176338:-	0.12	4.19	2.98e-05		KIRC	cis	rs838147	0.563	rs281379	chr19:49214274	NTN5	chr19:49164666-49176264:-	0.15	3.82	0.000149	Dietary macronutrient intake
BRCA	rs633372	chr19:49209226	G/A	NTN5	chr19:49164664-49176338:-	0.11	3.76	0.000178		KIRC	cis	rs838147	0.76	rs281408	chr19:49233406	NTN5	chr19:49164666-49176264:-	0.14	3.59	0.000365	Dietary macronutrient intake
BRCA	rs646327	chr19:49209851	A/G	NTN5	chr19:49164664-49176338:-	0.11	3.93	9.04e-05		KIRC	cis	rs838147	0.76	rs412712	chr19:49234299	NTN5	chr19:49164666-49176264:-	-0.14	-3.54	0.000431	Dietary macronutrient intake
BRCA	rs679574	chr19:49206108	C/G	NTN5	chr19:49164664-49176338:-	0.11	3.79	0.000156		KIRC	cis	rs838147	0.378	rs492602	chr19:49206417	NTN5	chr19:49164666-49176264:-	0.14	3.59	0.000365	Dietary macronutrient intake
BRCA	rs681343	chr19:49206462	C/T	NTN5	chr19:49164664-49176338:-	0.11	3.84	0.000128		KIRC	cis	rs838147	0.537	rs503279	chr19:49209010	NTN5	chr19:49164666-49176264:-	-0.19	-4.98	8.77e-07	Dietary macronutrient intake
BRCA	rs692854	chr19:49209464	C/A	NTN5	chr19:49164664-49176338:-	0.12	3.96	7.85e-05		KIRC	cis	rs838147	0.537	rs504963	chr19:49208865	NTN5	chr19:49164666-49176264:-	0.19	5.02	7.12e-07	Dietary macronutrient intake
BRCA	rs8103121	chr19:49158138	C/T	NTN5	chr19:49164664-49176338:-	0.11	3.53	0.000427		KIRC	cis	rs838147	0.508	rs507711	chr19:49208564	NTN5	chr19:49164666-49176264:-	0.19	4.84	1.71e-06	Dietary macronutrient intake
COAD	rs10402785	chr19:49196722	A/G	NTN5	chr19:49164664-49176338:-	-0.44	-3.89	0.000128		KIRC	cis	rs838147	0.508	rs507766	chr19:49208543	NTN5	chr19:49164666-49176264:-	0.19	4.82	1.89e-06	Dietary macronutrient intake
KIRC	rs1688264	chr19:49209560	T/G	NTN5	chr19:49164664-49176338:-	0.17	4.51	8.12e-06		KIRC	cis	rs838147	0.378	rs516246	chr19:49206172	NTN5	chr19:49164666-49176264:-	0.14	3.59	0.000369	Dietary macronutrient intake
KIRC	rs1704773	chr19:49209566	A/G	NTN5	chr19:49164664-49176338:-	0.17	4.51	8.12e-06		KIRC	cis	rs838147	0.378	rs516316	chr19:49206145	NTN5	chr19:49164666-49176264:-	0.14	3.58	0.000379	Dietary macronutrient intake
KIRC	rs2548458	chr19:49209325	C/T	NTN5	chr19:49164664-49176338:-	0.18	4.55	6.66e-06		KIRC	cis	rs838147	0.537	rs632111	chr19:49208978	NTN5	chr19:49164666-49176264:-	0.17	4.39	1.35e-05	Dietary macronutrient intake
KIRC	rs2548459	chr19:49209339	T/C	NTN5	chr19:49164664-49176338:-	0.18	4.55	6.63e-06		KIRC	cis	rs838147	0.479	rs633372	chr19:49209226	NTN5	chr19:49164666-49176264:-	0.17	4.49	8.69e-06	Dietary macronutrient intake
KIRC	rs2638280	chr19:49209318	G/A	NTN5	chr19:49164664-49176338:-	0.18	4.55	6.63e-06		KIRC	cis	rs73058052	0.491	rs67179000	chr19:50078988	NTN5	chr19:49164666-49176264:-	0.26	3.51	0.000497	Fibrinogen levels
KIRC	rs281379	chr19:49214274	C/T	NTN5	chr19:49164664-49176338:-	0.15	3.82	0.000149		KIRC	cis	rs838147	0.378	rs679574	chr19:49206108	NTN5	chr19:49164666-49176264:-	0.15	3.62	0.000323	Dietary macronutrient intake
KIRC	rs281408	chr19:49233406	A/C	NTN5	chr19:49164664-49176338:-	0.14	3.59	0.000365		KIRC	cis	rs838147	0.378	rs681343	chr19:49206462	NTN5	chr19:49164666-49176264:-	0.14	3.6	0.000352	Dietary macronutrient intake
KIRC	rs28362844	chr19:49208344	AC/A	NTN5	chr19:49164664-49176338:-	0.18	4.6	5.42e-06		KIRC	cis	rs838147	0.507	rs692854	chr19:49209464	NTN5	chr19:49164666-49176264:-	0.19	5.03	6.81e-07	Dietary macronutrient intake
KIRC	rs412712	chr19:49234299	A/T	NTN5	chr19:49164664-49176338:-	-0.14	-3.54	0.000431		KIRP	cis	rs838147	0.844	rs11083948	chr19:49248120	NTN5	chr19:49164666-49176264:-	-0.25	-4.45	1.28e-05	Dietary macronutrient intake
KIRC	rs492602	chr19:49206417	A/G	NTN5	chr19:49164664-49176338:-	0.14	3.59	0.000365		KIRP	cis	rs838147	0.873	rs11667321	chr19:49250538	NTN5	chr19:49164666-49176264:-	-0.24	-4.07	6.22e-05	Dietary macronutrient intake
KIRC	rs503279	chr19:49209010	C/T	NTN5	chr19:49164664-49176338:-	-0.19	-4.98	8.77e-07		KIRP	cis	rs838147	0.844	rs11672046	chr19:49247601	NTN5	chr19:49164666-49176264:-	-0.25	-4.45	1.27e-05	Dietary macronutrient intake
KIRC	rs504963	chr19:49208865	G/A	NTN5	chr19:49164664-49176338:-	0.19	5.02	7.12e-07		KIRP	cis	rs838147	0.844	rs12611201	chr19:49248255	NTN5	chr19:49164666-49176264:-	-0.25	-4.45	1.28e-05	Dietary macronutrient intake
KIRC	rs506897	chr19:49208629	G/C	NTN5	chr19:49164664-49176338:-	0.19	4.99	8.34e-07		KIRP	cis	rs838147	0.844	rs12611203	chr19:49248295	NTN5	chr19:49164666-49176264:-	-0.25	-4.45	1.28e-05	Dietary macronutrient intake
KIRC	rs507711	chr19:49208564	C/T	NTN5	chr19:49164664-49176338:-	0.19	4.84	1.71e-06		KIRP	cis	rs838147	0.844	rs12611211	chr19:49248331	NTN5	chr19:49164666-49176264:-	-0.26	-4.55	8.07e-06	Dietary macronutrient intake
KIRC	rs507766	chr19:49208543	T/C	NTN5	chr19:49164664-49176338:-	0.19	4.82	1.89e-06		KIRP	cis	rs838147	0.844	rs12975033	chr19:49249443	NTN5	chr19:49164666-49176264:-	-0.25	-4.43	1.4e-05	Dietary macronutrient intake
KIRC	rs507855	chr19:49208501	A/G	NTN5	chr19:49164664-49176338:-	0.18	4.71	3.19e-06		KIRP	cis	rs838147	0.733	rs12975781	chr19:49249698	NTN5	chr19:49164666-49176264:-	0.25	4.43	1.37e-05	Dietary macronutrient intake
KIRC	rs516246	chr19:49206172	C/T	NTN5	chr19:49164664-49176338:-	0.14	3.59	0.000369		KIRP	cis	rs838147	0.733	rs12978499	chr19:49237552	NTN5	chr19:49164666-49176264:-	-0.27	-4.72	3.75e-06	Dietary macronutrient intake
KIRC	rs516316	chr19:49206145	C/G	NTN5	chr19:49164664-49176338:-	0.14	3.58	0.000379		KIRP	cis	rs838147	0.76	rs12979144	chr19:49237547	NTN5	chr19:49164666-49176264:-	-0.27	-4.72	3.75e-06	Dietary macronutrient intake
KIRC	rs632111	chr19:49208978	A/G	NTN5	chr19:49164664-49176338:-	0.17	4.39	1.35e-05		KIRP	cis	rs838147	0.844	rs12982115	chr19:49248640	NTN5	chr19:49164666-49176264:-	-0.26	-4.56	7.99e-06	Dietary macronutrient intake
KIRC	rs633372	chr19:49209226	G/A	NTN5	chr19:49164664-49176338:-	0.17	4.49	8.69e-06		KIRP	cis	rs838147	0.407	rs204248	chr19:49216224	NTN5	chr19:49164666-49176264:-	-0.26	-4.63	5.67e-06	Dietary macronutrient intake
KIRC	rs646327	chr19:49209851	A/G	NTN5	chr19:49164664-49176338:-	0.19	5.03	6.89e-07		KIRP	cis	rs838147	0.407	rs281381	chr19:49214748	NTN5	chr19:49164666-49176264:-	0.25	4.54	8.58e-06	Dietary macronutrient intake
KIRC	rs67179000	chr19:50078988	T/C	NTN5	chr19:49164664-49176338:-	0.26	3.51	0.000497		KIRP	cis	rs838147	0.407	rs281386	chr19:49217305	NTN5	chr19:49164666-49176264:-	-0.26	-4.64	5.53e-06	Dietary macronutrient intake
KIRC	rs679574	chr19:49206108	C/G	NTN5	chr19:49164664-49176338:-	0.15	3.62	0.000323		KIRP	cis	rs838147	0.76	rs281408	chr19:49233406	NTN5	chr19:49164666-49176264:-	0.25	4.37	1.82e-05	Dietary macronutrient intake
KIRC	rs681343	chr19:49206462	C/T	NTN5	chr19:49164664-49176338:-	0.14	3.6	0.000352		KIRP	cis	rs838147	0.815	rs28400015	chr19:49250633	NTN5	chr19:49164666-49176264:-	-0.23	-4.19	3.87e-05	Dietary macronutrient intake
KIRC	rs692854	chr19:49209464	C/A	NTN5	chr19:49164664-49176338:-	0.19	5.03	6.81e-07		KIRP	cis	rs838147	0.76	rs412712	chr19:49234299	NTN5	chr19:49164666-49176264:-	-0.25	-4.32	2.22e-05	Dietary macronutrient intake
KIRP	rs11083948	chr19:49248120	A/G	NTN5	chr19:49164664-49176338:-	-0.25	-4.45	1.28e-05		KIRP	cis	rs838147	0.537	rs485073	chr19:49207255	NTN5	chr19:49164666-49176264:-	0.23	4.04	7e-05	Dietary macronutrient intake
KIRP	rs11667321	chr19:49250538	A/G	NTN5	chr19:49164664-49176338:-	-0.24	-4.07	6.22e-05		KIRP	cis	rs838147	0.537	rs485186	chr19:49207206	NTN5	chr19:49164666-49176264:-	0.22	4.01	8.05e-05	Dietary macronutrient intake
KIRP	rs11672046	chr19:49247601	C/T	NTN5	chr19:49164664-49176338:-	-0.25	-4.45	1.27e-05		KIRP	cis	rs838147	0.378	rs492602	chr19:49206417	NTN5	chr19:49164666-49176264:-	0.26	4.68	4.56e-06	Dietary macronutrient intake
KIRP	rs12460295	chr19:49247124	T/G	NTN5	chr19:49164664-49176338:-	-0.25	-4.45	1.27e-05		KIRP	cis	rs838147	0.378	rs516246	chr19:49206172	NTN5	chr19:49164666-49176264:-	0.25	4.59	6.92e-06	Dietary macronutrient intake
KIRP	rs12462324	chr19:49247086	A/G	NTN5	chr19:49164664-49176338:-	-0.25	-4.45	1.27e-05		KIRP	cis	rs838147	0.378	rs516316	chr19:49206145	NTN5	chr19:49164666-49176264:-	0.27	4.82	2.38e-06	Dietary macronutrient intake
KIRP	rs12611201	chr19:49248255	G/A	NTN5	chr19:49164664-49176338:-	-0.25	-4.45	1.28e-05		KIRP	cis	rs601338	1	rs601338	chr19:49206674	NTN5	chr19:49164666-49176264:-	0.25	4.57	7.4e-06	Blood metabolite levels;Blood metabolite ratios
KIRP	rs12611203	chr19:49248295	G/A	NTN5	chr19:49164664-49176338:-	-0.25	-4.45	1.28e-05		KIRP	cis	rs838147	0.537	rs602662	chr19:49206985	NTN5	chr19:49164666-49176264:-	0.22	4	8.38e-05	Dietary macronutrient intake
KIRP	rs12611211	chr19:49248331	G/A	NTN5	chr19:49164664-49176338:-	-0.26	-4.55	8.07e-06		KIRP	cis	rs838147	0.537	rs603985	chr19:49207257	NTN5	chr19:49164666-49176264:-	0.22	4.01	8.05e-05	Dietary macronutrient intake
KIRP	rs12975033	chr19:49249443	A/T	NTN5	chr19:49164664-49176338:-	-0.25	-4.43	1.4e-05		KIRP	cis	rs838147	0.378	rs679574	chr19:49206108	NTN5	chr19:49164666-49176264:-	0.25	4.45	1.24e-05	Dietary macronutrient intake
KIRP	rs12975781	chr19:49249698	A/G	NTN5	chr19:49164664-49176338:-	0.25	4.43	1.37e-05		KIRP	cis	rs838147	0.378	rs681343	chr19:49206462	NTN5	chr19:49164666-49176264:-	0.25	4.58	7.09e-06	Dietary macronutrient intake
KIRP	rs12978499	chr19:49237552	A/C	NTN5	chr19:49164664-49176338:-	-0.27	-4.72	3.75e-06		KIRP	cis	rs838147	0.844	rs8102032	chr19:49249795	NTN5	chr19:49164666-49176264:-	-0.23	-4.03	7.26e-05	Dietary macronutrient intake
KIRP	rs12979144	chr19:49237547	G/A	NTN5	chr19:49164664-49176338:-	-0.27	-4.72	3.75e-06		KIRP	cis	rs838147	0.844	rs8104897	chr19:49249814	NTN5	chr19:49164666-49176264:-	-0.23	-4.09	5.64e-05	Dietary macronutrient intake
KIRP	rs12982115	chr19:49248640	A/G	NTN5	chr19:49164664-49176338:-	-0.26	-4.56	7.99e-06		KIRP	cis	rs838147	0.844	rs8105137	chr19:49249888	NTN5	chr19:49164666-49176264:-	-0.23	-4.03	7.26e-05	Dietary macronutrient intake
KIRP	rs204248	chr19:49216224	G/C	NTN5	chr19:49164664-49176338:-	-0.26	-4.63	5.67e-06		KIRP	cis	rs838147	0.733	rs8106205	chr19:49250197	NTN5	chr19:49164666-49176264:-	-0.24	-4.12	5.14e-05	Dietary macronutrient intake
KIRP	rs281381	chr19:49214748	C/T	NTN5	chr19:49164664-49176338:-	0.25	4.54	8.58e-06		KIRP	cis	rs838147	0.844	rs8108136	chr19:49247693	NTN5	chr19:49164666-49176264:-	-0.25	-4.45	1.27e-05	Dietary macronutrient intake
KIRP	rs281386	chr19:49217305	A/G	NTN5	chr19:49164664-49176338:-	-0.26	-4.64	5.53e-06		KIRP	cis	rs838147	0.844	rs8108468	chr19:49247786	NTN5	chr19:49164666-49176264:-	-0.25	-4.45	1.27e-05	Dietary macronutrient intake
KIRP	rs281408	chr19:49233406	A/C	NTN5	chr19:49164664-49176338:-	0.25	4.37	1.82e-05		KIRP	cis	rs838147	0.844	rs8111208	chr19:49248022	NTN5	chr19:49164666-49176264:-	-0.25	-4.45	1.27e-05	Dietary macronutrient intake
KIRP	rs28362844	chr19:49208344	AC/A	NTN5	chr19:49164664-49176338:-	0.22	3.83	0.00016		KIRP	cis	rs838147	0.844	rs8111288	chr19:49247900	NTN5	chr19:49164666-49176264:-	-0.25	-4.45	1.27e-05	Dietary macronutrient intake
KIRP	rs28400015	chr19:49250633	G/A	NTN5	chr19:49164664-49176338:-	-0.23	-4.19	3.87e-05		KIRP	cis	rs838147	0.844	rs8111399	chr19:49247963	NTN5	chr19:49164666-49176264:-	-0.25	-4.45	1.27e-05	Dietary macronutrient intake
KIRP	rs412712	chr19:49234299	A/T	NTN5	chr19:49164664-49176338:-	-0.25	-4.32	2.22e-05		LGG	cis	rs838147	0.844	rs12975033	chr19:49249443	NTN5	chr19:49164666-49176264:-	-0.12	-3.5	0.000505	Dietary macronutrient intake
KIRP	rs485073	chr19:49207255	A/G	NTN5	chr19:49164664-49176338:-	0.23	4.04	7e-05		LGG	cis	rs838147	0.563	rs281379	chr19:49214274	NTN5	chr19:49164666-49176264:-	0.14	4.11	4.62e-05	Dietary macronutrient intake
KIRP	rs485186	chr19:49207206	A/G	NTN5	chr19:49164664-49176338:-	0.22	4.01	8.05e-05		LGG	cis	rs838147	0.407	rs281381	chr19:49214748	NTN5	chr19:49164666-49176264:-	0.12	3.63	0.000308	Dietary macronutrient intake
KIRP	rs492602	chr19:49206417	A/G	NTN5	chr19:49164664-49176338:-	0.26	4.68	4.56e-06		LGG	cis	rs838147	0.378	rs516316	chr19:49206145	NTN5	chr19:49164666-49176264:-	0.12	3.68	0.000255	Dietary macronutrient intake
KIRP	rs516246	chr19:49206172	C/T	NTN5	chr19:49164664-49176338:-	0.25	4.59	6.92e-06		PRAD	cis	rs838147	0.505	rs1688264	chr19:49209560	NTN5	chr19:49164666-49176264:-	0.13	3.65	0.000289	Dietary macronutrient intake
KIRP	rs516316	chr19:49206145	C/G	NTN5	chr19:49164664-49176338:-	0.27	4.82	2.38e-06		PRAD	cis	rs838147	0.507	rs1704773	chr19:49209566	NTN5	chr19:49164666-49176264:-	0.13	3.65	0.000289	Dietary macronutrient intake
KIRP	rs56066508	chr19:49241400	C/T	NTN5	chr19:49164664-49176338:-	-0.26	-4.5	1.03e-05		PRAD	cis	rs838147	0.534	rs2638280	chr19:49209318	NTN5	chr19:49164666-49176264:-	0.13	3.64	0.0003	Dietary macronutrient intake
KIRP	rs570794	chr19:49207651	T/C	NTN5	chr19:49164664-49176338:-	0.22	4	8.13e-05		PRAD	cis	rs838147	0.563	rs281379	chr19:49214274	NTN5	chr19:49164666-49176264:-	0.13	3.55	0.00042	Dietary macronutrient intake
KIRP	rs571689	chr19:49207554	C/T	NTN5	chr19:49164664-49176338:-	0.22	4	8.11e-05		PRAD	cis	rs838147	0.537	rs503279	chr19:49209010	NTN5	chr19:49164666-49176264:-	-0.13	-3.65	0.000296	Dietary macronutrient intake
KIRP	rs601338	chr19:49206674	G/A	NTN5	chr19:49164664-49176338:-	0.25	4.57	7.4e-06		PRAD	cis	rs838147	0.537	rs504963	chr19:49208865	NTN5	chr19:49164666-49176264:-	0.13	3.81	0.00016	Dietary macronutrient intake
KIRP	rs602662	chr19:49206985	G/A	NTN5	chr19:49164664-49176338:-	0.22	4	8.38e-05		PRAD	cis	rs838147	0.508	rs507711	chr19:49208564	NTN5	chr19:49164666-49176264:-	0.14	3.93	9.82e-05	Dietary macronutrient intake
KIRP	rs603985	chr19:49207257	T/C	NTN5	chr19:49164664-49176338:-	0.22	4.01	8.05e-05		PRAD	cis	rs838147	0.508	rs507766	chr19:49208543	NTN5	chr19:49164666-49176264:-	0.13	3.72	0.000219	Dietary macronutrient intake
KIRP	rs679574	chr19:49206108	C/G	NTN5	chr19:49164664-49176338:-	0.25	4.45	1.24e-05		PRAD	cis	rs838147	0.378	rs516246	chr19:49206172	NTN5	chr19:49164666-49176264:-	0.12	3.46	0.000586	Dietary macronutrient intake
KIRP	rs681343	chr19:49206462	C/T	NTN5	chr19:49164664-49176338:-	0.25	4.58	7.09e-06		PRAD	cis	rs838147	0.378	rs516316	chr19:49206145	NTN5	chr19:49164666-49176264:-	0.12	3.52	0.000465	Dietary macronutrient intake
KIRP	rs8102032	chr19:49249795	C/T	NTN5	chr19:49164664-49176338:-	-0.23	-4.03	7.26e-05		PRAD	cis	rs838147	0.537	rs632111	chr19:49208978	NTN5	chr19:49164666-49176264:-	0.12	3.56	0.000407	Dietary macronutrient intake
KIRP	rs8104897	chr19:49249814	C/A	NTN5	chr19:49164664-49176338:-	-0.23	-4.09	5.64e-05		PRAD	cis	rs838147	0.479	rs633372	chr19:49209226	NTN5	chr19:49164666-49176264:-	0.13	3.71	0.000236	Dietary macronutrient intake
KIRP	rs8105137	chr19:49249888	G/A	NTN5	chr19:49164664-49176338:-	-0.23	-4.03	7.26e-05		PRAD	cis	rs838147	0.507	rs692854	chr19:49209464	NTN5	chr19:49164666-49176264:-	0.13	3.82	0.00015	Dietary macronutrient intake
KIRP	rs8106205	chr19:49250197	T/C	NTN5	chr19:49164664-49176338:-	-0.24	-4.12	5.14e-05		THCA	cis	rs838147	0.844	rs11083948	chr19:49248120	NTN5	chr19:49164666-49176264:-	-0.19	-5.17	3.36e-07	Dietary macronutrient intake
KIRP	rs8108136	chr19:49247693	C/T	NTN5	chr19:49164664-49176338:-	-0.25	-4.45	1.27e-05		THCA	cis	rs838147	0.873	rs11667321	chr19:49250538	NTN5	chr19:49164666-49176264:-	-0.19	-5.37	1.23e-07	Dietary macronutrient intake
KIRP	rs8108468	chr19:49247786	G/A	NTN5	chr19:49164664-49176338:-	-0.25	-4.45	1.27e-05		THCA	cis	rs838147	0.844	rs11672046	chr19:49247601	NTN5	chr19:49164666-49176264:-	-0.18	-5.17	3.42e-07	Dietary macronutrient intake
KIRP	rs8111208	chr19:49248022	A/C	NTN5	chr19:49164664-49176338:-	-0.25	-4.45	1.27e-05		THCA	cis	rs838147	0.844	rs12611201	chr19:49248255	NTN5	chr19:49164666-49176264:-	-0.19	-5.17	3.36e-07	Dietary macronutrient intake
KIRP	rs8111288	chr19:49247900	G/A	NTN5	chr19:49164664-49176338:-	-0.25	-4.45	1.27e-05		THCA	cis	rs838147	0.844	rs12611203	chr19:49248295	NTN5	chr19:49164666-49176264:-	-0.19	-5.17	3.36e-07	Dietary macronutrient intake
KIRP	rs8111399	chr19:49247963	G/T	NTN5	chr19:49164664-49176338:-	-0.25	-4.45	1.27e-05		THCA	cis	rs838147	0.844	rs12611211	chr19:49248331	NTN5	chr19:49164666-49176264:-	-0.19	-5.18	3.33e-07	Dietary macronutrient intake
LGG	rs12975033	chr19:49249443	A/T	NTN5	chr19:49164664-49176338:-	-0.12	-3.5	0.000505		THCA	cis	rs838147	0.844	rs12975033	chr19:49249443	NTN5	chr19:49164666-49176264:-	-0.18	-5.05	6.22e-07	Dietary macronutrient intake
LGG	rs281379	chr19:49214274	C/T	NTN5	chr19:49164664-49176338:-	0.14	4.11	4.62e-05		THCA	cis	rs838147	0.733	rs12975781	chr19:49249698	NTN5	chr19:49164666-49176264:-	0.17	4.78	2.31e-06	Dietary macronutrient intake
LGG	rs281381	chr19:49214748	C/T	NTN5	chr19:49164664-49176338:-	0.12	3.63	0.000308		THCA	cis	rs838147	0.733	rs12978499	chr19:49237552	NTN5	chr19:49164666-49176264:-	-0.19	-5.35	1.38e-07	Dietary macronutrient intake
LGG	rs436303	chr19:48659409	A/G	NTN5	chr19:49164664-49176338:-	0.18	3.48	0.000552		THCA	cis	rs838147	0.76	rs12979144	chr19:49237547	NTN5	chr19:49164666-49176264:-	-0.19	-5.35	1.38e-07	Dietary macronutrient intake
LGG	rs516316	chr19:49206145	C/G	NTN5	chr19:49164664-49176338:-	0.12	3.68	0.000255		THCA	cis	rs838147	0.815	rs12981072	chr19:49241006	NTN5	chr19:49164666-49176264:-	-0.19	-5.34	1.47e-07	Dietary macronutrient intake
PRAD	rs1688264	chr19:49209560	T/G	NTN5	chr19:49164664-49176338:-	0.13	3.65	0.000289		THCA	cis	rs838147	0.844	rs12982115	chr19:49248640	NTN5	chr19:49164666-49176264:-	-0.19	-5.21	2.81e-07	Dietary macronutrient intake
PRAD	rs1704773	chr19:49209566	A/G	NTN5	chr19:49164664-49176338:-	0.13	3.65	0.000289		THCA	cis	rs838147	0.505	rs1688264	chr19:49209560	NTN5	chr19:49164666-49176264:-	0.27	7.62	1.41e-13	Dietary macronutrient intake
PRAD	rs2548458	chr19:49209325	C/T	NTN5	chr19:49164664-49176338:-	0.13	3.64	0.0003		THCA	cis	rs838147	0.507	rs1704773	chr19:49209566	NTN5	chr19:49164666-49176264:-	0.27	7.62	1.41e-13	Dietary macronutrient intake
PRAD	rs2548459	chr19:49209339	T/C	NTN5	chr19:49164664-49176338:-	0.13	3.64	0.0003		THCA	cis	rs838147	0.407	rs204248	chr19:49216224	NTN5	chr19:49164666-49176264:-	-0.15	-4.24	2.69e-05	Dietary macronutrient intake
PRAD	rs2638280	chr19:49209318	G/A	NTN5	chr19:49164664-49176338:-	0.13	3.64	0.0003		THCA	cis	rs838147	0.844	rs2307018	chr19:49244219	NTN5	chr19:49164666-49176264:-	-0.19	-5.34	1.41e-07	Dietary macronutrient intake
PRAD	rs281379	chr19:49214274	C/T	NTN5	chr19:49164664-49176338:-	0.13	3.55	0.00042		THCA	cis	rs838147	0.844	rs2307019	chr19:49244220	NTN5	chr19:49164666-49176264:-	-0.19	-5.34	1.41e-07	Dietary macronutrient intake
PRAD	rs28362844	chr19:49208344	AC/A	NTN5	chr19:49164664-49176338:-	0.13	3.81	0.000155		THCA	cis	rs838147	0.534	rs2638280	chr19:49209318	NTN5	chr19:49164666-49176264:-	0.26	7.27	1.5e-12	Dietary macronutrient intake
PRAD	rs503279	chr19:49209010	C/T	NTN5	chr19:49164664-49176338:-	-0.13	-3.65	0.000296		THCA	cis	rs838147	0.563	rs2638282	chr19:49213833	NTN5	chr19:49164666-49176264:-	0.28	7.78	4.49e-14	Dietary macronutrient intake
PRAD	rs504963	chr19:49208865	G/A	NTN5	chr19:49164664-49176338:-	0.13	3.81	0.00016		THCA	cis	rs838147	0.563	rs281379	chr19:49214274	NTN5	chr19:49164666-49176264:-	0.24	6.73	4.75e-11	Dietary macronutrient intake
PRAD	rs506897	chr19:49208629	G/C	NTN5	chr19:49164664-49176338:-	0.13	3.81	0.000156		THCA	cis	rs838147	0.32	rs281380	chr19:49214470	NTN5	chr19:49164666-49176264:-	-0.14	-3.85	0.000133	Dietary macronutrient intake
PRAD	rs507711	chr19:49208564	C/T	NTN5	chr19:49164664-49176338:-	0.14	3.93	9.82e-05		THCA	cis	rs838147	0.407	rs281381	chr19:49214748	NTN5	chr19:49164666-49176264:-	0.15	4.18	3.46e-05	Dietary macronutrient intake
PRAD	rs507766	chr19:49208543	T/C	NTN5	chr19:49164664-49176338:-	0.13	3.72	0.000219		THCA	cis	rs838147	0.407	rs281386	chr19:49217305	NTN5	chr19:49164666-49176264:-	-0.15	-4.19	3.37e-05	Dietary macronutrient intake
PRAD	rs507855	chr19:49208501	A/G	NTN5	chr19:49164664-49176338:-	0.13	3.79	0.000173		THCA	cis	rs838147	0.76	rs281408	chr19:49233406	NTN5	chr19:49164666-49176264:-	0.2	5.69	2.26e-08	Dietary macronutrient intake
PRAD	rs516246	chr19:49206172	C/T	NTN5	chr19:49164664-49176338:-	0.12	3.46	0.000586		THCA	cis	rs838147	0.873	rs28400014	chr19:49250657	NTN5	chr19:49164666-49176264:-	-0.19	-5.27	2.03e-07	Dietary macronutrient intake
PRAD	rs516316	chr19:49206145	C/G	NTN5	chr19:49164664-49176338:-	0.12	3.52	0.000465		THCA	cis	rs838147	0.815	rs28400015	chr19:49250633	NTN5	chr19:49164666-49176264:-	-0.18	-5.16	3.69e-07	Dietary macronutrient intake
PRAD	rs632111	chr19:49208978	A/G	NTN5	chr19:49164664-49176338:-	0.12	3.56	0.000407		THCA	cis	rs433852	0.718	rs386551	chr19:49138286	NTN5	chr19:49164666-49176264:-	-0.16	-4.19	3.39e-05	Elevated serum carcinoembryonic antigen levels;Posterior cortical atrophy and Alzheimer's disease
PRAD	rs633372	chr19:49209226	G/A	NTN5	chr19:49164664-49176338:-	0.13	3.71	0.000236		THCA	cis	rs838147	0.76	rs412712	chr19:49234299	NTN5	chr19:49164666-49176264:-	-0.2	-5.73	1.83e-08	Dietary macronutrient intake
PRAD	rs646327	chr19:49209851	A/G	NTN5	chr19:49164664-49176338:-	0.14	3.94	9.5e-05		THCA	cis	rs838147	0.378	rs492602	chr19:49206417	NTN5	chr19:49164666-49176264:-	0.26	7.19	2.46e-12	Dietary macronutrient intake
PRAD	rs692854	chr19:49209464	C/A	NTN5	chr19:49164664-49176338:-	0.13	3.82	0.00015		THCA	cis	rs838147	0.537	rs503279	chr19:49209010	NTN5	chr19:49164666-49176264:-	-0.26	-7.49	3.25e-13	Dietary macronutrient intake
THCA	rs11083948	chr19:49248120	A/G	NTN5	chr19:49164664-49176338:-	-0.19	-5.17	3.36e-07		THCA	cis	rs838147	0.537	rs504963	chr19:49208865	NTN5	chr19:49164666-49176264:-	0.26	7.49	3.3e-13	Dietary macronutrient intake
THCA	rs11381763	chr19:49247998	G/GC	NTN5	chr19:49164664-49176338:-	-0.19	-5.27	2.08e-07		THCA	cis	rs838147	0.508	rs507711	chr19:49208564	NTN5	chr19:49164666-49176264:-	0.26	7.45	4.36e-13	Dietary macronutrient intake
THCA	rs11428934	chr19:49144245	T/TG	NTN5	chr19:49164664-49176338:-	0.14	3.74	0.000205		THCA	cis	rs838147	0.508	rs507766	chr19:49208543	NTN5	chr19:49164666-49176264:-	0.26	7.5	3.04e-13	Dietary macronutrient intake
THCA	rs11667321	chr19:49250538	A/G	NTN5	chr19:49164664-49176338:-	-0.19	-5.37	1.23e-07		THCA	cis	rs838147	0.378	rs516246	chr19:49206172	NTN5	chr19:49164666-49176264:-	0.26	7.22	2.11e-12	Dietary macronutrient intake
THCA	rs11672046	chr19:49247601	C/T	NTN5	chr19:49164664-49176338:-	-0.18	-5.17	3.42e-07		THCA	cis	rs838147	0.378	rs516316	chr19:49206145	NTN5	chr19:49164666-49176264:-	0.25	7	8.57e-12	Dietary macronutrient intake
THCA	rs12460295	chr19:49247124	T/G	NTN5	chr19:49164664-49176338:-	-0.18	-5.17	3.42e-07		THCA	cis	rs433852	0.718	rs550455	chr19:49136515	NTN5	chr19:49164666-49176264:-	-0.15	-4.04	6.13e-05	Elevated serum carcinoembryonic antigen levels;Posterior cortical atrophy and Alzheimer's disease
THCA	rs12462324	chr19:49247086	A/G	NTN5	chr19:49164664-49176338:-	-0.18	-5.17	3.42e-07		THCA	cis	rs838147	0.338	rs56098615	chr19:49247999	NTN5	chr19:49164666-49176264:-	-0.19	-5.27	2.08e-07	Dietary macronutrient intake
THCA	rs12611201	chr19:49248255	G/A	NTN5	chr19:49164664-49176338:-	-0.19	-5.17	3.36e-07		THCA	cis	rs838147	0.537	rs632111	chr19:49208978	NTN5	chr19:49164666-49176264:-	0.27	7.67	9.47e-14	Dietary macronutrient intake
THCA	rs12611203	chr19:49248295	G/A	NTN5	chr19:49164664-49176338:-	-0.19	-5.17	3.36e-07		THCA	cis	rs838147	0.479	rs633372	chr19:49209226	NTN5	chr19:49164666-49176264:-	0.27	7.63	1.31e-13	Dietary macronutrient intake
THCA	rs12611211	chr19:49248331	G/A	NTN5	chr19:49164664-49176338:-	-0.19	-5.18	3.33e-07		THCA	cis	rs838147	0.534	rs676388	chr19:49211969	NTN5	chr19:49164666-49176264:-	0.27	7.64	1.19e-13	Dietary macronutrient intake
THCA	rs12975033	chr19:49249443	A/T	NTN5	chr19:49164664-49176338:-	-0.18	-5.05	6.22e-07		THCA	cis	rs838147	0.378	rs679574	chr19:49206108	NTN5	chr19:49164666-49176264:-	0.26	7.21	2.13e-12	Dietary macronutrient intake
THCA	rs12975781	chr19:49249698	A/G	NTN5	chr19:49164664-49176338:-	0.17	4.78	2.31e-06		THCA	cis	rs838147	0.378	rs681343	chr19:49206462	NTN5	chr19:49164666-49176264:-	0.26	7.23	1.91e-12	Dietary macronutrient intake
THCA	rs12978499	chr19:49237552	A/C	NTN5	chr19:49164664-49176338:-	-0.19	-5.35	1.38e-07		THCA	cis	rs838147	0.507	rs692854	chr19:49209464	NTN5	chr19:49164666-49176264:-	0.26	7.59	1.71e-13	Dietary macronutrient intake
THCA	rs12979144	chr19:49237547	G/A	NTN5	chr19:49164664-49176338:-	-0.19	-5.35	1.38e-07		THCA	cis	rs838147	0.844	rs8102032	chr19:49249795	NTN5	chr19:49164666-49176264:-	-0.19	-5.25	2.31e-07	Dietary macronutrient intake
THCA	rs12981072	chr19:49241006	C/G	NTN5	chr19:49164664-49176338:-	-0.19	-5.34	1.47e-07		THCA	cis	rs433852	0.904	rs8102492	chr19:49140809	NTN5	chr19:49164666-49176264:-	0.17	4.23	2.77e-05	Elevated serum carcinoembryonic antigen levels;Posterior cortical atrophy and Alzheimer's disease
THCA	rs12982115	chr19:49248640	A/G	NTN5	chr19:49164664-49176338:-	-0.19	-5.21	2.81e-07		THCA	cis	rs838147	0.844	rs8104897	chr19:49249814	NTN5	chr19:49164666-49176264:-	-0.19	-5.25	2.32e-07	Dietary macronutrient intake
THCA	rs137896889	chr19:49141406	AAGAC/A	NTN5	chr19:49164664-49176338:-	0.16	4.31	1.94e-05		THCA	cis	rs838147	0.844	rs8105137	chr19:49249888	NTN5	chr19:49164666-49176264:-	-0.19	-5.25	2.31e-07	Dietary macronutrient intake
THCA	rs147766034	chr19:49232029	G/GCAAA	NTN5	chr19:49164664-49176338:-	-0.19	-5.56	4.58e-08		THCA	cis	rs838147	0.733	rs8106205	chr19:49250197	NTN5	chr19:49164666-49176264:-	-0.19	-5.26	2.16e-07	Dietary macronutrient intake
THCA	rs1688264	chr19:49209560	T/G	NTN5	chr19:49164664-49176338:-	0.27	7.62	1.41e-13		THCA	cis	rs838147	0.844	rs8108136	chr19:49247693	NTN5	chr19:49164666-49176264:-	-0.18	-5.17	3.42e-07	Dietary macronutrient intake
THCA	rs1704773	chr19:49209566	A/G	NTN5	chr19:49164664-49176338:-	0.27	7.62	1.41e-13		THCA	cis	rs838147	0.844	rs8108468	chr19:49247786	NTN5	chr19:49164666-49176264:-	-0.18	-5.17	3.42e-07	Dietary macronutrient intake
THCA	rs204248	chr19:49216224	G/C	NTN5	chr19:49164664-49176338:-	-0.15	-4.24	2.69e-05		THCA	cis	rs838147	0.844	rs8111208	chr19:49248022	NTN5	chr19:49164666-49176264:-	-0.19	-5.17	3.36e-07	Dietary macronutrient intake
THCA	rs2307018	chr19:49244219	C/A	NTN5	chr19:49164664-49176338:-	-0.19	-5.34	1.41e-07		THCA	cis	rs838147	0.844	rs8111288	chr19:49247900	NTN5	chr19:49164666-49176264:-	-0.18	-5.13	4.23e-07	Dietary macronutrient intake
THCA	rs2307019	chr19:49244220	G/A	NTN5	chr19:49164664-49176338:-	-0.19	-5.34	1.41e-07		THCA	cis	rs838147	0.844	rs8111399	chr19:49247963	NTN5	chr19:49164666-49176264:-	-0.18	-5.17	3.42e-07	Dietary macronutrient intake
THCA	rs2548458	chr19:49209325	C/T	NTN5	chr19:49164664-49176338:-	0.26	7.25	1.67e-12
THCA	rs2548459	chr19:49209339	T/C	NTN5	chr19:49164664-49176338:-	0.26	7.27	1.5e-12
THCA	rs2638280	chr19:49209318	G/A	NTN5	chr19:49164664-49176338:-	0.26	7.27	1.5e-12
THCA	rs2638282	chr19:49213833	G/A	NTN5	chr19:49164664-49176338:-	0.28	7.78	4.49e-14
THCA	rs2665586	chr19:49099381	A/G	NTN5	chr19:49164664-49176338:-	0.18	3.41	0.000699
THCA	rs274873	chr19:48679709	C/T	NTN5	chr19:49164664-49176338:-	-0.12	-3.43	0.000645
THCA	rs274874	chr19:48679760	G/A	NTN5	chr19:49164664-49176338:-	-0.12	-3.52	0.000481
THCA	rs281379	chr19:49214274	C/T	NTN5	chr19:49164664-49176338:-	0.24	6.73	4.75e-11
THCA	rs281380	chr19:49214470	A/G	NTN5	chr19:49164664-49176338:-	-0.14	-3.85	0.000133
THCA	rs281381	chr19:49214748	C/T	NTN5	chr19:49164664-49176338:-	0.15	4.18	3.46e-05
THCA	rs281386	chr19:49217305	A/G	NTN5	chr19:49164664-49176338:-	-0.15	-4.19	3.37e-05
THCA	rs281408	chr19:49233406	A/C	NTN5	chr19:49164664-49176338:-	0.2	5.69	2.26e-08
THCA	rs28362844	chr19:49208344	AC/A	NTN5	chr19:49164664-49176338:-	0.26	7.38	7e-13
THCA	rs28400014	chr19:49250657	C/G	NTN5	chr19:49164664-49176338:-	-0.19	-5.27	2.03e-07
THCA	rs28400015	chr19:49250633	G/A	NTN5	chr19:49164664-49176338:-	-0.18	-5.16	3.69e-07
THCA	rs28894750	chr19:49213531	A/T	NTN5	chr19:49164664-49176338:-	0.27	7.67	9.6e-14
THCA	rs34630951	chr19:49131764	A/AAG	NTN5	chr19:49164664-49176338:-	-0.15	-3.96	8.77e-05
THCA	rs386551	chr19:49138286	C/G	NTN5	chr19:49164664-49176338:-	-0.16	-4.19	3.39e-05
THCA	rs412712	chr19:49234299	A/T	NTN5	chr19:49164664-49176338:-	-0.2	-5.73	1.83e-08
THCA	rs4365394	chr19:49145513	C/T	NTN5	chr19:49164664-49176338:-	0.16	4.02	6.85e-05
THCA	rs492602	chr19:49206417	A/G	NTN5	chr19:49164664-49176338:-	0.26	7.19	2.46e-12
THCA	rs503279	chr19:49209010	C/T	NTN5	chr19:49164664-49176338:-	-0.26	-7.49	3.25e-13
THCA	rs504963	chr19:49208865	G/A	NTN5	chr19:49164664-49176338:-	0.26	7.49	3.3e-13
THCA	rs506897	chr19:49208629	G/C	NTN5	chr19:49164664-49176338:-	0.26	7.51	3.02e-13
THCA	rs507711	chr19:49208564	C/T	NTN5	chr19:49164664-49176338:-	0.26	7.45	4.36e-13
THCA	rs507766	chr19:49208543	T/C	NTN5	chr19:49164664-49176338:-	0.26	7.5	3.04e-13
THCA	rs507855	chr19:49208501	A/G	NTN5	chr19:49164664-49176338:-	0.26	7.55	2.17e-13
THCA	rs516246	chr19:49206172	C/T	NTN5	chr19:49164664-49176338:-	0.26	7.22	2.11e-12
THCA	rs516316	chr19:49206145	C/G	NTN5	chr19:49164664-49176338:-	0.25	7	8.57e-12
THCA	rs550455	chr19:49136515	A/G	NTN5	chr19:49164664-49176338:-	-0.15	-4.04	6.13e-05
THCA	rs55720021	chr19:49144241	G/T	NTN5	chr19:49164664-49176338:-	0.15	3.98	7.94e-05
THCA	rs56066508	chr19:49241400	C/T	NTN5	chr19:49164664-49176338:-	-0.19	-5.17	3.39e-07
THCA	rs56098615	chr19:49247999	T/A	NTN5	chr19:49164664-49176338:-	-0.19	-5.27	2.08e-07
THCA	rs632111	chr19:49208978	A/G	NTN5	chr19:49164664-49176338:-	0.27	7.67	9.47e-14
THCA	rs633372	chr19:49209226	G/A	NTN5	chr19:49164664-49176338:-	0.27	7.63	1.31e-13
THCA	rs646327	chr19:49209851	A/G	NTN5	chr19:49164664-49176338:-	0.26	7.56	2.05e-13
THCA	rs67000082	chr19:49137897	GC/G	NTN5	chr19:49164664-49176338:-	-0.15	-3.96	8.56e-05
THCA	rs676388	chr19:49211969	T/C	NTN5	chr19:49164664-49176338:-	0.27	7.64	1.19e-13
THCA	rs679574	chr19:49206108	C/G	NTN5	chr19:49164664-49176338:-	0.26	7.21	2.13e-12
THCA	rs681343	chr19:49206462	C/T	NTN5	chr19:49164664-49176338:-	0.26	7.23	1.91e-12
THCA	rs692854	chr19:49209464	C/A	NTN5	chr19:49164664-49176338:-	0.26	7.59	1.71e-13
THCA	rs71335811	chr19:49130070	TC/T	NTN5	chr19:49164664-49176338:-	-0.15	-4.07	5.48e-05
THCA	rs8102032	chr19:49249795	C/T	NTN5	chr19:49164664-49176338:-	-0.19	-5.25	2.31e-07
THCA	rs8102492	chr19:49140809	A/C	NTN5	chr19:49164664-49176338:-	0.17	4.23	2.77e-05
THCA	rs8104897	chr19:49249814	C/A	NTN5	chr19:49164664-49176338:-	-0.19	-5.25	2.32e-07
THCA	rs8105137	chr19:49249888	G/A	NTN5	chr19:49164664-49176338:-	-0.19	-5.25	2.31e-07
THCA	rs8106205	chr19:49250197	T/C	NTN5	chr19:49164664-49176338:-	-0.19	-5.26	2.16e-07
THCA	rs8108136	chr19:49247693	C/T	NTN5	chr19:49164664-49176338:-	-0.18	-5.17	3.42e-07
THCA	rs8108468	chr19:49247786	G/A	NTN5	chr19:49164664-49176338:-	-0.18	-5.17	3.42e-07
THCA	rs8111208	chr19:49248022	A/C	NTN5	chr19:49164664-49176338:-	-0.19	-5.17	3.36e-07
THCA	rs8111288	chr19:49247900	G/A	NTN5	chr19:49164664-49176338:-	-0.18	-5.13	4.23e-07
THCA	rs8111399	chr19:49247963	G/T	NTN5	chr19:49164664-49176338:-	-0.18	-5.17	3.42e-07

## Sheet: NTNG1
Cancer type	SNP ID	SNP position (hg19)	Alleles (A/a)	Gene symbol	Gene position (hg19)	Beta	t-stat	p-valule		Cancer type	eQTL type	tagSNP	LD	SNP ID	SNP position (hg19)	Gene symbol	Gene position (hg19)	Beta	t-stat	p-value	GWAS-Traits
BRCA	rs10218457	chr1:107571244	A/G	NTNG1	chr1:107682629-108026080:+	0.16	3.52	0.000457		BRCA	cis	rs4118325	0.954	rs10218457	chr1:107571244	NTNG1	chr1:107682629-108024471:+	0.16	3.52	0.000457	AIDS
BRCA	rs10218458	chr1:107571327	A/G	NTNG1	chr1:107682629-108026080:+	0.16	3.45	0.000573		BRCA	cis	rs4118325	1	rs10218458	chr1:107571327	NTNG1	chr1:107682629-108024471:+	0.16	3.45	0.000573	AIDS
BRCA	rs10218763	chr1:107571159	C/T	NTNG1	chr1:107682629-108026080:+	0.16	3.45	0.000573		BRCA	cis	rs4118325	0.954	rs10218763	chr1:107571159	NTNG1	chr1:107682629-108024471:+	0.16	3.45	0.000573	AIDS
BRCA	rs10494057	chr1:107576399	A/C	NTNG1	chr1:107682629-108026080:+	0.17	3.69	0.000237		BRCA	cis	rs4118325	1	rs10494057	chr1:107576399	NTNG1	chr1:107682629-108024471:+	0.17	3.69	0.000237	AIDS
BRCA	rs10785814	chr1:107610540	A/G	NTNG1	chr1:107682629-108026080:+	0.16	3.54	0.000421		BRCA	cis	rs4118325	1	rs10785814	chr1:107610540	NTNG1	chr1:107682629-108024471:+	0.16	3.54	0.000421	AIDS
BRCA	rs10881465	chr1:107938505	C/G	NTNG1	chr1:107682629-108026080:+	-0.12	-3.38	0.000757		BRCA	cis	rs4118325	0.908	rs11185045	chr1:107560639	NTNG1	chr1:107682629-108024471:+	0.16	3.45	0.000584	AIDS
BRCA	rs11185045	chr1:107560639	G/C	NTNG1	chr1:107682629-108026080:+	0.16	3.45	0.000584		BRCA	cis	rs4118325	0.954	rs11185049	chr1:107562556	NTNG1	chr1:107682629-108024471:+	0.16	3.48	0.000515	AIDS
BRCA	rs11185049	chr1:107562556	A/G	NTNG1	chr1:107682629-108026080:+	0.16	3.48	0.000515		BRCA	cis	rs4118325	0.908	rs11185050	chr1:107564543	NTNG1	chr1:107682629-108024471:+	0.15	3.45	0.00058	AIDS
BRCA	rs11185050	chr1:107564543	G/A	NTNG1	chr1:107682629-108026080:+	0.15	3.45	0.00058		BRCA	cis	rs4118325	1	rs11185057	chr1:107596964	NTNG1	chr1:107682629-108024471:+	0.17	3.74	0.000197	AIDS
BRCA	rs11185057	chr1:107596964	T/C	NTNG1	chr1:107682629-108026080:+	0.17	3.74	0.000197		BRCA	cis	rs4118325	0.609	rs11185062	chr1:107661735	NTNG1	chr1:107682629-108024471:+	0.18	3.8	0.000152	AIDS
BRCA	rs11185059	chr1:107611742	T/G	NTNG1	chr1:107682629-108026080:+	0.17	3.71	0.000222		BRCA	cis	rs4118325	1	rs12021578	chr1:107597501	NTNG1	chr1:107682629-108024471:+	0.16	3.56	0.000389	AIDS
BRCA	rs11185062	chr1:107661735	C/T	NTNG1	chr1:107682629-108026080:+	0.18	3.8	0.000152		BRCA	cis	rs4118325	0.954	rs12034643	chr1:107563695	NTNG1	chr1:107682629-108024471:+	0.16	3.46	0.000563	AIDS
BRCA	rs12021578	chr1:107597501	G/A	NTNG1	chr1:107682629-108026080:+	0.16	3.56	0.000389		BRCA	cis	rs4118325	0.609	rs12092049	chr1:107660849	NTNG1	chr1:107682629-108024471:+	0.19	3.9	0.000101	AIDS
BRCA	rs12034643	chr1:107563695	T/C	NTNG1	chr1:107682629-108026080:+	0.16	3.46	0.000563		BRCA	cis	rs4118325	0.652	rs1632771	chr1:107648423	NTNG1	chr1:107682629-108024471:+	-0.19	-3.94	8.75e-05	AIDS
BRCA	rs12092049	chr1:107660849	T/C	NTNG1	chr1:107682629-108026080:+	0.19	3.9	0.000101		BRCA	cis	rs4118325	0.69	rs1730871	chr1:107636845	NTNG1	chr1:107682629-108024471:+	0.21	4.62	4.29e-06	AIDS
BRCA	rs145143168	chr1:107255369	C/CT	NTNG1	chr1:107682629-108026080:+	0.27	3.51	0.00046		BRCA	cis	rs4118325	0.652	rs1762500	chr1:107649367	NTNG1	chr1:107682629-108024471:+	-0.17	-3.59	0.00034	AIDS
BRCA	rs146183588	chr1:107252564	G/GT	NTNG1	chr1:107682629-108026080:+	0.27	3.51	0.000475		BRCA	cis	rs4118325	0.553	rs1762501	chr1:107649582	NTNG1	chr1:107682629-108024471:+	-0.19	-3.94	8.75e-05	AIDS
BRCA	rs148373759	chr1:107621792	T/TTTGGCATATTTATGTTA	NTNG1	chr1:107682629-108026080:+	0.16	3.53	0.000428		BRCA	cis	rs4118325	0.954	rs4096996	chr1:107564415	NTNG1	chr1:107682629-108024471:+	-0.15	-3.38	0.000756	AIDS
BRCA	rs150143080	chr1:107962032	G/GAAAAAGA	NTNG1	chr1:107682629-108026080:+	0.13	3.43	0.000628		BRCA	cis	rs4118325	0.954	rs4118320	chr1:107564449	NTNG1	chr1:107682629-108024471:+	-0.16	-3.58	0.000361	AIDS
BRCA	rs1632771	chr1:107648423	G/T	NTNG1	chr1:107682629-108026080:+	-0.19	-3.94	8.75e-05		BRCA	cis	rs4118325	1	rs6684571	chr1:107623224	NTNG1	chr1:107682629-108024471:+	0.16	3.58	0.000361	AIDS
BRCA	rs1730871	chr1:107636845	C/G	NTNG1	chr1:107682629-108026080:+	0.21	4.62	4.29e-06		BRCA	cis	rs4118325	0.954	rs6694685	chr1:107564826	NTNG1	chr1:107682629-108024471:+	0.15	3.45	0.00058	AIDS
BRCA	rs17509160	chr1:107855013	C/T	NTNG1	chr1:107682629-108026080:+	0.26	3.53	0.000439		BRCA	cis	rs4118325	0.652	rs7514481	chr1:107665433	NTNG1	chr1:107682629-108024471:+	0.19	3.94	8.75e-05	AIDS
BRCA	rs17530951	chr1:107964634	C/T	NTNG1	chr1:107682629-108026080:+	0.12	3.4	0.00071		BRCA	cis	rs4118325	0.652	rs7537866	chr1:107665479	NTNG1	chr1:107682629-108024471:+	0.2	4.02	6.18e-05	AIDS
BRCA	rs1762500	chr1:107649367	T/A	NTNG1	chr1:107682629-108026080:+	-0.17	-3.59	0.00034		BRCA	cis	rs4118325	1	rs7543089	chr1:107591693	NTNG1	chr1:107682629-108024471:+	0.17	3.76	0.000181	AIDS
BRCA	rs1762501	chr1:107649582	A/C	NTNG1	chr1:107682629-108026080:+	-0.19	-3.94	8.75e-05		BRCA	cis	rs12097821	0.551	rs77491500	chr1:107247090	NTNG1	chr1:107682629-108024471:+	0.27	3.51	0.000475	Non-obstructive azoospermia	非梗阻性无精子症
BRCA	rs36077475	chr1:107242419	A/ATT	NTNG1	chr1:107682629-108026080:+	0.27	3.61	0.000326		BRCA	cis	rs12097821	0.551	rs80042192	chr1:107229984	NTNG1	chr1:107682629-108024471:+	0.27	3.6	0.000328	Non-obstructive azoospermia
BRCA	rs4096996	chr1:107564415	A/G	NTNG1	chr1:107682629-108026080:+	-0.15	-3.38	0.000756		BRCA	cis	rs4118325	0.954	rs9662586	chr1:107597961	NTNG1	chr1:107682629-108024471:+	0.16	3.56	0.000389	AIDS
BRCA	rs4118320	chr1:107564449	A/G	NTNG1	chr1:107682629-108026080:+	-0.16	-3.58	0.000361		HNSC	cis	rs12097821	0.673	rs11184960	chr1:107216719	NTNG1	chr1:107682629-108024471:+	0.37	4.21	3.08e-05	Non-obstructive azoospermia
BRCA	rs6684571	chr1:107623224	G/A	NTNG1	chr1:107682629-108026080:+	0.16	3.58	0.000361		HNSC	cis	rs12097821	0.673	rs112539959	chr1:107211704	NTNG1	chr1:107682629-108024471:+	0.34	3.71	0.000232	Non-obstructive azoospermia
BRCA	rs6694685	chr1:107564826	A/T	NTNG1	chr1:107682629-108026080:+	0.15	3.45	0.00058		HNSC	cis	rs12097821	0.673	rs113588885	chr1:107208439	NTNG1	chr1:107682629-108024471:+	0.34	3.7	0.000243	Non-obstructive azoospermia
BRCA	rs71764148	chr1:107661817	AAGT/A	NTNG1	chr1:107682629-108026080:+	0.19	3.76	0.000179		HNSC	cis	rs12097821	0.673	rs1156426	chr1:107380662	NTNG1	chr1:107682629-108024471:+	-0.33	-3.85	0.000132	Non-obstructive azoospermia
BRCA	rs7514481	chr1:107665433	C/T	NTNG1	chr1:107682629-108026080:+	0.19	3.94	8.75e-05		HNSC	cis	rs12097821	0.551	rs116005440	chr1:107208722	NTNG1	chr1:107682629-108024471:+	0.43	3.78	0.000178	Non-obstructive azoospermia
BRCA	rs7537866	chr1:107665479	C/T	NTNG1	chr1:107682629-108026080:+	0.2	4.02	6.18e-05		HNSC	cis	rs12097821	0.673	rs12060904	chr1:107206300	NTNG1	chr1:107682629-108024471:+	0.38	4.3	2.02e-05	Non-obstructive azoospermia
BRCA	rs7543089	chr1:107591693	C/A	NTNG1	chr1:107682629-108026080:+	0.17	3.76	0.000181		HNSC	cis	rs12097821	0.611	rs12062790	chr1:107208406	NTNG1	chr1:107682629-108024471:+	0.38	4.33	1.8e-05	Non-obstructive azoospermia
BRCA	rs77491500	chr1:107247090	G/A	NTNG1	chr1:107682629-108026080:+	0.27	3.51	0.000475		HNSC	cis	rs12097821	0.673	rs12063720	chr1:107208081	NTNG1	chr1:107682629-108024471:+	0.38	4.34	1.76e-05	Non-obstructive azoospermia
BRCA	rs80042192	chr1:107229984	A/C	NTNG1	chr1:107682629-108026080:+	0.27	3.6	0.000328		HNSC	cis	rs12097821	0.673	rs12063902	chr1:107208466	NTNG1	chr1:107682629-108024471:+	0.38	4.33	1.8e-05	Non-obstructive azoospermia
BRCA	rs9662586	chr1:107597961	T/C	NTNG1	chr1:107682629-108026080:+	0.16	3.56	0.000389		HNSC	cis	rs12097821	0.673	rs12065128	chr1:107201593	NTNG1	chr1:107682629-108024471:+	0.34	3.82	0.000152	Non-obstructive azoospermia
COAD	rs10785796	chr1:107179340	A/G	NTNG1	chr1:107682629-108026080:+	0.22	3.81	0.00017		HNSC	cis	rs12097821	0.604	rs12066188	chr1:107207603	NTNG1	chr1:107682629-108024471:+	0.35	3.89	0.000112	Non-obstructive azoospermia
COAD	rs10785797	chr1:107179362	G/A	NTNG1	chr1:107682629-108026080:+	0.22	3.82	0.000167		HNSC	cis	rs12097821	0.673	rs12066688	chr1:107216073	NTNG1	chr1:107682629-108024471:+	0.37	4.21	3.08e-05	Non-obstructive azoospermia
COAD	rs11185117	chr1:107988041	T/C	NTNG1	chr1:107682629-108026080:+	-0.21	-3.87	0.000139		HNSC	cis	rs12097821	0.673	rs12074685	chr1:107213259	NTNG1	chr1:107682629-108024471:+	0.33	3.77	0.000181	Non-obstructive azoospermia
COAD	rs12117762	chr1:107995842	T/C	NTNG1	chr1:107682629-108026080:+	0.23	3.9	0.000121		HNSC	cis	rs12097821	0.673	rs12077984	chr1:107208268	NTNG1	chr1:107682629-108024471:+	0.35	3.89	0.000112	Non-obstructive azoospermia
COAD	rs35518635	chr1:107995305	T/C	NTNG1	chr1:107682629-108026080:+	0.22	3.82	0.00017		HNSC	cis	rs12097821	0.673	rs12079433	chr1:107209364	NTNG1	chr1:107682629-108024471:+	0.39	4.34	1.7e-05	Non-obstructive azoospermia
COAD	rs374984313	chr1:106981403	T/G	NTNG1	chr1:107682629-108026080:+	-0.5	-3.96	9.49e-05		HNSC	cis	rs4118325	0.734	rs1335057	chr1:107632354	NTNG1	chr1:107682629-108024471:+	-0.25	-3.89	0.000114	AIDS
COAD	rs590987	chr1:107986409	A/G	NTNG1	chr1:107682629-108026080:+	-0.23	-3.98	8.89e-05		HNSC	cis	rs4118325	0.69	rs1537702	chr1:107631739	NTNG1	chr1:107682629-108024471:+	-0.26	-4.04	6.32e-05	AIDS
COAD	rs625926	chr1:107997627	G/C	NTNG1	chr1:107682629-108026080:+	0.23	3.82	0.000164		HNSC	cis	rs4118325	0.743	rs1537704	chr1:107632077	NTNG1	chr1:107682629-108024471:+	-0.26	-4.02	6.81e-05	AIDS
COAD	rs640554	chr1:107990065	G/A	NTNG1	chr1:107682629-108026080:+	0.22	3.81	0.000171		HNSC	cis	rs12097821	0.673	rs1607635	chr1:107379942	NTNG1	chr1:107682629-108024471:+	-0.33	-3.85	0.000132	Non-obstructive azoospermia
COAD	rs6660032	chr1:106982478	C/T	NTNG1	chr1:107682629-108026080:+	-0.47	-3.83	0.000158		HNSC	cis	rs12097821	0.673	rs17017475	chr1:107259785	NTNG1	chr1:107682629-108024471:+	0.29	3.68	0.000263	Non-obstructive azoospermia
COAD	rs694898	chr1:107989289	T/C	NTNG1	chr1:107682629-108026080:+	0.23	4	8.17e-05		HNSC	cis	rs4118325	0.734	rs1730848	chr1:107632396	NTNG1	chr1:107682629-108024471:+	-0.25	-3.89	0.000114	AIDS
COAD	rs74106292	chr1:106977455	G/C	NTNG1	chr1:107682629-108026080:+	-0.51	-4	8.19e-05		HNSC	cis	rs4118325	0.734	rs1730849	chr1:107632368	NTNG1	chr1:107682629-108024471:+	-0.24	-3.78	0.000177	AIDS
COAD	rs74106295	chr1:106978931	A/G	NTNG1	chr1:107682629-108026080:+	-0.49	-3.94	0.000106		HNSC	cis	rs4118325	0.734	rs1762489	chr1:107632374	NTNG1	chr1:107682629-108024471:+	-0.25	-3.91	0.000104	AIDS
HNSC	rs11184960	chr1:107216719	A/C	NTNG1	chr1:107682629-108026080:+	0.37	4.21	3.08e-05		HNSC	cis	rs4118325	0.734	rs1762490	chr1:107632541	NTNG1	chr1:107682629-108024471:+	-0.25	-3.91	0.000104	AIDS
HNSC	rs112539959	chr1:107211704	C/T	NTNG1	chr1:107682629-108026080:+	0.34	3.71	0.000232		HNSC	cis	rs4118325	0.697	rs1762491	chr1:107632931	NTNG1	chr1:107682629-108024471:+	-0.25	-3.93	9.73e-05	AIDS
HNSC	rs113588885	chr1:107208439	T/C	NTNG1	chr1:107682629-108026080:+	0.34	3.7	0.000243		HNSC	cis	rs4118325	0.734	rs1762495	chr1:107634116	NTNG1	chr1:107682629-108024471:+	-0.27	-4.37	1.51e-05	AIDS
HNSC	rs1156426	chr1:107380662	C/T	NTNG1	chr1:107682629-108026080:+	-0.33	-3.85	0.000132		HNSC	cis	rs4118325	0.629	rs1762496	chr1:107634228	NTNG1	chr1:107682629-108024471:+	-0.25	-4.07	5.42e-05	AIDS
HNSC	rs116005440	chr1:107208722	G/T	NTNG1	chr1:107682629-108026080:+	0.43	3.78	0.000178		HNSC	cis	rs4118325	0.734	rs1762497	chr1:107634442	NTNG1	chr1:107682629-108024471:+	-0.26	-4.1	4.86e-05	AIDS
HNSC	rs12060904	chr1:107206300	T/G	NTNG1	chr1:107682629-108026080:+	0.38	4.3	2.02e-05		HNSC	cis	rs12097821	0.673	rs4338391	chr1:107226805	NTNG1	chr1:107682629-108024471:+	0.31	3.66	0.000284	Non-obstructive azoospermia
HNSC	rs12062790	chr1:107208406	A/G	NTNG1	chr1:107682629-108026080:+	0.38	4.33	1.8e-05		HNSC	cis	rs12097821	0.673	rs4614293	chr1:107256357	NTNG1	chr1:107682629-108024471:+	0.31	3.68	0.000255	Non-obstructive azoospermia
HNSC	rs12063720	chr1:107208081	T/C	NTNG1	chr1:107682629-108026080:+	0.38	4.34	1.76e-05		HNSC	cis	rs12097821	0.673	rs55885362	chr1:107206882	NTNG1	chr1:107682629-108024471:+	0.38	4.3	2.02e-05	Non-obstructive azoospermia
HNSC	rs12063902	chr1:107208466	T/C	NTNG1	chr1:107682629-108026080:+	0.38	4.33	1.8e-05		HNSC	cis	rs12097821	0.673	rs6582989	chr1:107377450	NTNG1	chr1:107682629-108024471:+	-0.33	-4.03	6.43e-05	Non-obstructive azoospermia
HNSC	rs12065128	chr1:107201593	G/T	NTNG1	chr1:107682629-108026080:+	0.34	3.82	0.000152		HNSC	cis	rs12097821	0.673	rs72982124	chr1:107202420	NTNG1	chr1:107682629-108024471:+	0.34	3.81	0.000154	Non-obstructive azoospermia
HNSC	rs12066188	chr1:107207603	G/A	NTNG1	chr1:107682629-108026080:+	0.35	3.89	0.000112		HNSC	cis	rs12097821	0.673	rs72982130	chr1:107207111	NTNG1	chr1:107682629-108024471:+	0.38	4.3	2.02e-05	Non-obstructive azoospermia
HNSC	rs12066688	chr1:107216073	A/G	NTNG1	chr1:107682629-108026080:+	0.37	4.21	3.08e-05		HNSC	cis	rs12097821	0.673	rs72982138	chr1:107211035	NTNG1	chr1:107682629-108024471:+	0.34	3.71	0.000232	Non-obstructive azoospermia
HNSC	rs12074685	chr1:107213259	G/T	NTNG1	chr1:107682629-108026080:+	0.33	3.77	0.000181		HNSC	cis	rs12097821	0.673	rs72982144	chr1:107213759	NTNG1	chr1:107682629-108024471:+	0.33	3.77	0.000181	Non-obstructive azoospermia
HNSC	rs12077984	chr1:107208268	C/G	NTNG1	chr1:107682629-108026080:+	0.35	3.89	0.000112		HNSC	cis	rs12097821	0.673	rs72982148	chr1:107216419	NTNG1	chr1:107682629-108024471:+	0.37	4.21	3.08e-05	Non-obstructive azoospermia
HNSC	rs12079433	chr1:107209364	C/T	NTNG1	chr1:107682629-108026080:+	0.39	4.34	1.7e-05		HNSC	cis	rs12097821	0.673	rs7515817	chr1:107204738	NTNG1	chr1:107682629-108024471:+	0.35	3.86	0.00013	Non-obstructive azoospermia
HNSC	rs1335057	chr1:107632354	G/A	NTNG1	chr1:107682629-108026080:+	-0.25	-3.89	0.000114		HNSC	cis	rs12097821	0.544	rs7530116	chr1:107381726	NTNG1	chr1:107682629-108024471:+	-0.33	-3.88	0.000121	Non-obstructive azoospermia
HNSC	rs145143168	chr1:107255369	C/CT	NTNG1	chr1:107682629-108026080:+	0.46	4.03	6.58e-05		HNSC	cis	rs12097821	0.551	rs77491500	chr1:107247090	NTNG1	chr1:107682629-108024471:+	0.44	3.96	8.72e-05	Non-obstructive azoospermia
HNSC	rs145614063	chr1:107208160	CA/C	NTNG1	chr1:107682629-108026080:+	0.38	4.27	2.31e-05		HNSC	cis	rs12097821	0.673	rs78545289	chr1:107386250	NTNG1	chr1:107682629-108024471:+	0.34	3.7	0.000241	Non-obstructive azoospermia
HNSC	rs146183588	chr1:107252564	G/GT	NTNG1	chr1:107682629-108026080:+	0.44	3.96	8.72e-05		HNSC	cis	rs12097821	0.551	rs80042192	chr1:107229984	NTNG1	chr1:107682629-108024471:+	0.46	4.14	4.15e-05	Non-obstructive azoospermia
HNSC	rs147299481	chr1:107208818	G/GA	NTNG1	chr1:107682629-108026080:+	0.34	3.69	0.000246		HNSC	cis	rs12097821	0.673	rs80211416	chr1:107212319	NTNG1	chr1:107682629-108024471:+	0.33	3.77	0.000181	Non-obstructive azoospermia
HNSC	rs1537702	chr1:107631739	T/C	NTNG1	chr1:107682629-108026080:+	-0.26	-4.04	6.32e-05		HNSC	cis	rs12097821	0.541	rs908953	chr1:107374784	NTNG1	chr1:107682629-108024471:+	-0.31	-3.7	0.000244	Non-obstructive azoospermia
HNSC	rs1537704	chr1:107632077	A/G	NTNG1	chr1:107682629-108026080:+	-0.26	-4.02	6.81e-05		KIRC	cis	rs4118325	0.908	rs10458533	chr1:107560034	NTNG1	chr1:107682629-108024471:+	0.22	3.66	0.000284	AIDS
HNSC	rs1607635	chr1:107379942	T/C	NTNG1	chr1:107682629-108026080:+	-0.33	-3.85	0.000132		KIRC	cis	rs4118325	0.908	rs10494056	chr1:107547919	NTNG1	chr1:107682629-108024471:+	0.22	3.51	0.00048	AIDS
HNSC	rs17017475	chr1:107259785	C/T	NTNG1	chr1:107682629-108026080:+	0.29	3.68	0.000263		KIRC	cis	rs4118325	0.818	rs11185041	chr1:107559350	NTNG1	chr1:107682629-108024471:+	0.21	3.55	0.000425	AIDS
HNSC	rs1730848	chr1:107632396	T/A	NTNG1	chr1:107682629-108026080:+	-0.25	-3.89	0.000114		KIRC	cis	rs4118325	0.908	rs11185042	chr1:107559559	NTNG1	chr1:107682629-108024471:+	0.21	3.55	0.000425	AIDS
HNSC	rs1730849	chr1:107632368	T/C	NTNG1	chr1:107682629-108026080:+	-0.24	-3.78	0.000177		KIRC	cis	rs4118325	0.908	rs12031779	chr1:107545845	NTNG1	chr1:107682629-108024471:+	0.22	3.49	0.000526	AIDS
HNSC	rs1762489	chr1:107632374	A/C	NTNG1	chr1:107682629-108026080:+	-0.25	-3.91	0.000104		KIRC	cis	rs4118325	0.908	rs17496242	chr1:107545172	NTNG1	chr1:107682629-108024471:+	0.22	3.52	0.00047	AIDS
HNSC	rs1762490	chr1:107632541	T/C	NTNG1	chr1:107682629-108026080:+	-0.25	-3.91	0.000104		KIRC	cis	rs4118325	0.908	rs17496360	chr1:107546408	NTNG1	chr1:107682629-108024471:+	0.22	3.53	0.000456	AIDS
HNSC	rs1762491	chr1:107632931	A/T	NTNG1	chr1:107682629-108026080:+	-0.25	-3.93	9.73e-05		KIRC	cis	rs4118325	0.908	rs2078572	chr1:107547485	NTNG1	chr1:107682629-108024471:+	0.22	3.54	0.000438	AIDS
HNSC	rs1762492	chr1:107633608	A/G	NTNG1	chr1:107682629-108026080:+	-0.25	-4.03	6.37e-05		KIRC	cis	rs4118325	0.908	rs4096994	chr1:107547291	NTNG1	chr1:107682629-108024471:+	0.22	3.5	0.000504	AIDS
HNSC	rs1762495	chr1:107634116	A/G	NTNG1	chr1:107682629-108026080:+	-0.27	-4.37	1.51e-05		KIRC	cis	rs4118325	0.908	rs7519441	chr1:107544344	NTNG1	chr1:107682629-108024471:+	0.23	3.69	0.00025	AIDS
HNSC	rs1762496	chr1:107634228	T/C	NTNG1	chr1:107682629-108026080:+	-0.25	-4.07	5.42e-05		KIRP	cis	rs4118325	0.522	rs12746268	chr1:107707248	NTNG1	chr1:107682629-108024471:+	0.37	3.94	0.000104	AIDS
HNSC	rs1762497	chr1:107634442	C/G	NTNG1	chr1:107682629-108026080:+	-0.26	-4.1	4.86e-05		KIRP	cis	rs4118325	0.652	rs1819548	chr1:107639318	NTNG1	chr1:107682629-108024471:+	-0.33	-3.83	0.000161	AIDS
HNSC	rs34054540	chr1:107631826	A/AG	NTNG1	chr1:107682629-108026080:+	-0.26	-3.97	8.19e-05		KIRP	cis	rs4118325	0.603	rs4915017	chr1:107701368	NTNG1	chr1:107682629-108024471:+	0.4	3.92	0.000111	AIDS
HNSC	rs36077475	chr1:107242419	A/ATT	NTNG1	chr1:107682629-108026080:+	0.46	4.14	4.15e-05		KIRP	cis	rs4118325	0.562	rs4915018	chr1:107703913	NTNG1	chr1:107682629-108024471:+	0.4	3.93	0.000108	AIDS
HNSC	rs4338391	chr1:107226805	T/A	NTNG1	chr1:107682629-108026080:+	0.31	3.66	0.000284		KIRP	cis	rs4118325	0.562	rs61800177	chr1:107703530	NTNG1	chr1:107682629-108024471:+	0.4	3.93	0.000108	AIDS
HNSC	rs4614293	chr1:107256357	C/T	NTNG1	chr1:107682629-108026080:+	0.31	3.68	0.000255		KIRP	cis	rs4118325	0.652	rs6656996	chr1:107666980	NTNG1	chr1:107682629-108024471:+	0.34	3.89	0.000126	AIDS
HNSC	rs55885362	chr1:107206882	C/A	NTNG1	chr1:107682629-108026080:+	0.38	4.3	2.02e-05		KIRP	cis	rs4118325	0.541	rs6662026	chr1:107669666	NTNG1	chr1:107682629-108024471:+	0.3	3.89	0.000125	AIDS
HNSC	rs6582989	chr1:107377450	T/C	NTNG1	chr1:107682629-108026080:+	-0.33	-4.03	6.43e-05		LUSC	cis	rs4118325	0.908	rs11185050	chr1:107564543	NTNG1	chr1:107682629-108024471:+	0.23	3.86	0.000131	AIDS
HNSC	rs72982124	chr1:107202420	C/G	NTNG1	chr1:107682629-108026080:+	0.34	3.81	0.000154		LUSC	cis	rs4118325	0.954	rs11185051	chr1:107565856	NTNG1	chr1:107682629-108024471:+	0.23	3.87	0.000124	AIDS
HNSC	rs72982130	chr1:107207111	C/T	NTNG1	chr1:107682629-108026080:+	0.38	4.3	2.02e-05		LUSC	cis	rs17496332	0.312	rs2863734	chr1:107565081	NTNG1	chr1:107682629-108024471:+	-0.18	-3.71	0.000233	Sex hormone-binding globulin levels	性激素结合球蛋白水平
HNSC	rs72982138	chr1:107211035	T/A	NTNG1	chr1:107682629-108026080:+	0.34	3.71	0.000232		LUSC	cis	rs17496332	0.384	rs2863991	chr1:107548745	NTNG1	chr1:107682629-108024471:+	-0.19	-3.94	9.2e-05	Sex hormone-binding globulin levels
HNSC	rs72982144	chr1:107213759	G/A	NTNG1	chr1:107682629-108026080:+	0.33	3.77	0.000181		LUSC	cis	rs4118325	0.954	rs4096996	chr1:107564415	NTNG1	chr1:107682629-108024471:+	-0.24	-4.09	4.99e-05	AIDS
HNSC	rs72982148	chr1:107216419	A/C	NTNG1	chr1:107682629-108026080:+	0.37	4.21	3.08e-05		LUSC	cis	rs4118325	0.954	rs4118320	chr1:107564449	NTNG1	chr1:107682629-108024471:+	-0.23	-3.7	0.000239	AIDS
HNSC	rs7515817	chr1:107204738	G/A	NTNG1	chr1:107682629-108026080:+	0.35	3.86	0.00013		LUSC	cis	rs4118325	0.954	rs6694685	chr1:107564826	NTNG1	chr1:107682629-108024471:+	0.23	3.86	0.000131	AIDS
HNSC	rs7530116	chr1:107381726	C/A	NTNG1	chr1:107682629-108026080:+	-0.33	-3.88	0.000121		PRAD	cis	rs12097821	0.673	rs11184960	chr1:107216719	NTNG1	chr1:107682629-108024471:+	0.34	3.45	0.000613	Non-obstructive azoospermia
HNSC	rs77491500	chr1:107247090	G/A	NTNG1	chr1:107682629-108026080:+	0.44	3.96	8.72e-05		PRAD	cis	rs4118325	0.609	rs11185062	chr1:107661735	NTNG1	chr1:107682629-108024471:+	0.32	4.05	6.02e-05	AIDS
HNSC	rs78545289	chr1:107386250	C/T	NTNG1	chr1:107682629-108026080:+	0.34	3.7	0.000241		PRAD	cis	rs12097821	0.673	rs12060904	chr1:107206300	NTNG1	chr1:107682629-108024471:+	0.34	3.45	0.000613	Non-obstructive azoospermia
HNSC	rs80042192	chr1:107229984	A/C	NTNG1	chr1:107682629-108026080:+	0.46	4.14	4.15e-05		PRAD	cis	rs12097821	0.611	rs12062790	chr1:107208406	NTNG1	chr1:107682629-108024471:+	0.34	3.45	0.000613	Non-obstructive azoospermia
HNSC	rs80211416	chr1:107212319	G/T	NTNG1	chr1:107682629-108026080:+	0.33	3.77	0.000181		PRAD	cis	rs12097821	0.673	rs12063720	chr1:107208081	NTNG1	chr1:107682629-108024471:+	0.34	3.45	0.000613	Non-obstructive azoospermia
HNSC	rs908953	chr1:107374784	T/G	NTNG1	chr1:107682629-108026080:+	-0.31	-3.7	0.000244		PRAD	cis	rs12097821	0.673	rs12063902	chr1:107208466	NTNG1	chr1:107682629-108024471:+	0.34	3.45	0.000613	Non-obstructive azoospermia
KIRC	rs10458533	chr1:107560034	C/T	NTNG1	chr1:107682629-108026080:+	0.22	3.66	0.000284		PRAD	cis	rs12097821	0.673	rs12065128	chr1:107201593	NTNG1	chr1:107682629-108024471:+	0.36	3.47	0.000559	Non-obstructive azoospermia
KIRC	rs10494056	chr1:107547919	C/A	NTNG1	chr1:107682629-108026080:+	0.22	3.51	0.00048		PRAD	cis	rs12097821	0.604	rs12066188	chr1:107207603	NTNG1	chr1:107682629-108024471:+	0.36	3.47	0.000559	Non-obstructive azoospermia
KIRC	rs11185041	chr1:107559350	A/G	NTNG1	chr1:107682629-108026080:+	0.21	3.55	0.000425		PRAD	cis	rs12097821	0.673	rs12066688	chr1:107216073	NTNG1	chr1:107682629-108024471:+	0.34	3.45	0.000613	Non-obstructive azoospermia
KIRC	rs11185042	chr1:107559559	A/G	NTNG1	chr1:107682629-108026080:+	0.21	3.55	0.000425		PRAD	cis	rs12097821	0.673	rs12074685	chr1:107213259	NTNG1	chr1:107682629-108024471:+	0.36	3.47	0.000559	Non-obstructive azoospermia
KIRC	rs12031779	chr1:107545845	C/T	NTNG1	chr1:107682629-108026080:+	0.22	3.49	0.000526		PRAD	cis	rs12097821	0.673	rs12077984	chr1:107208268	NTNG1	chr1:107682629-108024471:+	0.36	3.47	0.000559	Non-obstructive azoospermia
KIRC	rs17496242	chr1:107545172	A/G	NTNG1	chr1:107682629-108026080:+	0.22	3.52	0.00047		PRAD	cis	rs12097821	0.673	rs12079433	chr1:107209364	NTNG1	chr1:107682629-108024471:+	0.34	3.45	0.000613	Non-obstructive azoospermia
KIRC	rs17496360	chr1:107546408	C/T	NTNG1	chr1:107682629-108026080:+	0.22	3.53	0.000456		PRAD	cis	rs4118325	0.609	rs12092049	chr1:107660849	NTNG1	chr1:107682629-108024471:+	0.34	4.3	2.08e-05	AIDS
KIRC	rs2078572	chr1:107547485	C/A	NTNG1	chr1:107682629-108026080:+	0.22	3.54	0.000438		PRAD	cis	rs4118325	0.652	rs12097796	chr1:107667203	NTNG1	chr1:107682629-108024471:+	0.29	3.6	0.000356	AIDS
KIRC	rs34038473	chr1:107548120	TA/T	NTNG1	chr1:107682629-108026080:+	0.22	3.59	0.000361		PRAD	cis	rs17496332	0.3	rs1335061	chr1:107590574	NTNG1	chr1:107682629-108024471:+	-0.23	-3.77	0.000184	Sex hormone-binding globulin levels
KIRC	rs34776239	chr1:107548214	AT/A	NTNG1	chr1:107682629-108026080:+	0.22	3.51	0.00048		PRAD	cis	rs4118325	0.652	rs1632771	chr1:107648423	NTNG1	chr1:107682629-108024471:+	-0.3	-3.81	0.00016	AIDS
KIRC	rs34812785	chr1:107548428	A/AC	NTNG1	chr1:107682629-108026080:+	0.21	3.5	0.000507		PRAD	cis	rs4118325	0.652	rs1730868	chr1:107647398	NTNG1	chr1:107682629-108024471:+	-0.3	-3.77	0.000185	AIDS
KIRC	rs35475154	chr1:107546466	CTAT/C	NTNG1	chr1:107682629-108026080:+	0.22	3.53	0.000456		PRAD	cis	rs12726652	0.316	rs17486419	chr1:106943366	NTNG1	chr1:107682629-108024471:+	0.36	3.51	0.000487	Response to antipsychotic treatment in schizophrenia (working memory)	对精神分裂症中抗精神病药治疗的反应（工作记忆）
KIRC	rs35674324	chr1:107546470	CA/C	NTNG1	chr1:107682629-108026080:+	0.22	3.53	0.000456		PRAD	cis	rs4118325	0.652	rs1762500	chr1:107649367	NTNG1	chr1:107682629-108024471:+	-0.31	-3.88	0.000117	AIDS
KIRC	rs4096994	chr1:107547291	A/G	NTNG1	chr1:107682629-108026080:+	0.22	3.5	0.000504		PRAD	cis	rs4118325	0.553	rs1762501	chr1:107649582	NTNG1	chr1:107682629-108024471:+	-0.3	-3.81	0.00016	AIDS
KIRC	rs7519441	chr1:107544344	T/C	NTNG1	chr1:107682629-108026080:+	0.23	3.69	0.00025		PRAD	cis	rs4118325	0.652	rs1819548	chr1:107639318	NTNG1	chr1:107682629-108024471:+	-0.28	-3.51	0.000496	AIDS
KIRP	rs12746268	chr1:107707248	G/T	NTNG1	chr1:107682629-108026080:+	0.37	3.94	0.000104		PRAD	cis	rs12097821	0.673	rs55885362	chr1:107206882	NTNG1	chr1:107682629-108024471:+	0.34	3.45	0.000613	Non-obstructive azoospermia
KIRP	rs1819548	chr1:107639318	G/A	NTNG1	chr1:107682629-108026080:+	-0.33	-3.83	0.000161		PRAD	cis	rs4118325	0.652	rs6656996	chr1:107666980	NTNG1	chr1:107682629-108024471:+	0.29	3.62	0.000322	AIDS
KIRP	rs4915017	chr1:107701368	C/T	NTNG1	chr1:107682629-108026080:+	0.4	3.92	0.000111		PRAD	cis	rs4118325	0.541	rs6662026	chr1:107669666	NTNG1	chr1:107682629-108024471:+	0.26	3.49	0.000522	AIDS
KIRP	rs4915018	chr1:107703913	G/T	NTNG1	chr1:107682629-108026080:+	0.4	3.93	0.000108		PRAD	cis	rs17496332	0.3	rs6680047	chr1:107624653	NTNG1	chr1:107682629-108024471:+	0.21	3.57	0.000387	Sex hormone-binding globulin levels
KIRP	rs61800177	chr1:107703530	C/T	NTNG1	chr1:107682629-108026080:+	0.4	3.93	0.000108		PRAD	cis	rs17496332	0.384	rs6685716	chr1:107553330	NTNG1	chr1:107682629-108024471:+	0.23	4	7.51e-05	Sex hormone-binding globulin levels
KIRP	rs6656996	chr1:107666980	T/C	NTNG1	chr1:107682629-108026080:+	0.34	3.89	0.000126		PRAD	cis	rs12097821	0.673	rs72982130	chr1:107207111	NTNG1	chr1:107682629-108024471:+	0.34	3.45	0.000613	Non-obstructive azoospermia
KIRP	rs6662026	chr1:107669666	A/C	NTNG1	chr1:107682629-108026080:+	0.3	3.89	0.000125		PRAD	cis	rs12097821	0.673	rs72982144	chr1:107213759	NTNG1	chr1:107682629-108024471:+	0.36	3.47	0.000559	Non-obstructive azoospermia
LUSC	rs11185050	chr1:107564543	G/A	NTNG1	chr1:107682629-108026080:+	0.23	3.86	0.000131		PRAD	cis	rs12097821	0.673	rs72982148	chr1:107216419	NTNG1	chr1:107682629-108024471:+	0.34	3.45	0.000613	Non-obstructive azoospermia
LUSC	rs11185051	chr1:107565856	C/T	NTNG1	chr1:107682629-108026080:+	0.23	3.87	0.000124		PRAD	cis	rs4118325	0.652	rs7514481	chr1:107665433	NTNG1	chr1:107682629-108024471:+	0.3	3.82	0.000154	AIDS
LUSC	rs11185172	chr1:108286632	A/G	NTNG1	chr1:107682629-108026080:+	-0.19	-3.86	0.000129		PRAD	cis	rs12097821	0.673	rs7515817	chr1:107204738	NTNG1	chr1:107682629-108024471:+	0.36	3.47	0.000559	Non-obstructive azoospermia
LUSC	rs2863734	chr1:107565081	A/C	NTNG1	chr1:107682629-108026080:+	-0.18	-3.71	0.000233		PRAD	cis	rs4118325	0.652	rs7537866	chr1:107665479	NTNG1	chr1:107682629-108024471:+	0.3	3.84	0.000139	AIDS
LUSC	rs2863991	chr1:107548745	C/T	NTNG1	chr1:107682629-108026080:+	-0.19	-3.94	9.2e-05		PRAD	cis	rs12097821	0.673	rs80211416	chr1:107212319	NTNG1	chr1:107682629-108024471:+	0.36	3.47	0.000559	Non-obstructive azoospermia
LUSC	rs4096996	chr1:107564415	A/G	NTNG1	chr1:107682629-108026080:+	-0.24	-4.09	4.99e-05		STAD	cis	rs4118325	0.774	rs76259395	chr1:107666942	NTNG1	chr1:107682629-108024471:+	0.3	4.22	3.05e-05	AIDS
LUSC	rs4118320	chr1:107564449	A/G	NTNG1	chr1:107682629-108026080:+	-0.23	-3.7	0.000239		THCA	cis	rs4118325	0.954	rs10047147	chr1:107561147	NTNG1	chr1:107682629-108024471:+	0.22	3.77	0.000185	AIDS
LUSC	rs4276945	chr1:108267094	T/C	NTNG1	chr1:107682629-108026080:+	0.19	3.9	0.00011		THCA	cis	rs4118325	0.954	rs10218457	chr1:107571244	NTNG1	chr1:107682629-108024471:+	0.2	3.39	0.000754	AIDS
LUSC	rs4914956	chr1:108257531	A/T	NTNG1	chr1:107682629-108026080:+	0.19	3.82	0.000151		THCA	cis	rs4118325	1	rs10218458	chr1:107571327	NTNG1	chr1:107682629-108024471:+	0.2	3.39	0.000746	AIDS
LUSC	rs6694685	chr1:107564826	A/T	NTNG1	chr1:107682629-108026080:+	0.23	3.86	0.000131		THCA	cis	rs4118325	0.954	rs10218763	chr1:107571159	NTNG1	chr1:107682629-108024471:+	0.2	3.43	0.000647	AIDS
LUSC	rs7537551	chr1:108275578	T/C	NTNG1	chr1:107682629-108026080:+	-0.21	-4.26	2.52e-05		THCA	cis	rs4118325	0.908	rs10458533	chr1:107560034	NTNG1	chr1:107682629-108024471:+	0.22	3.73	0.000219	AIDS
PRAD	rs11184959	chr1:107213976	G/A	NTNG1	chr1:107682629-108026080:+	-0.25	-4.17	3.64e-05		THCA	cis	rs4118325	0.908	rs10494056	chr1:107547919	NTNG1	chr1:107682629-108024471:+	0.21	3.38	0.000795	AIDS
PRAD	rs11184960	chr1:107216719	A/C	NTNG1	chr1:107682629-108026080:+	0.34	3.45	0.000613		THCA	cis	rs4118325	1	rs10494057	chr1:107576399	NTNG1	chr1:107682629-108024471:+	0.2	3.45	0.000607	AIDS
PRAD	rs11184968	chr1:107243262	T/C	NTNG1	chr1:107682629-108026080:+	-0.25	-4.17	3.64e-05		THCA	cis	rs4118325	1	rs10785814	chr1:107610540	NTNG1	chr1:107682629-108024471:+	0.22	3.78	0.000175	AIDS
PRAD	rs11185039	chr1:107558177	T/C	NTNG1	chr1:107682629-108026080:+	0.22	3.6	0.000357		THCA	cis	rs4118325	0.954	rs10881455	chr1:107561546	NTNG1	chr1:107682629-108024471:+	0.22	3.77	0.000185	AIDS
PRAD	rs11185062	chr1:107661735	C/T	NTNG1	chr1:107682629-108026080:+	0.32	4.05	6.02e-05		THCA	cis	rs4118325	0.908	rs11185037	chr1:107543055	NTNG1	chr1:107682629-108024471:+	0.22	3.58	0.000383	AIDS
PRAD	rs11586118	chr1:107184037	A/G	NTNG1	chr1:107682629-108026080:+	-0.24	-3.84	0.000142		THCA	cis	rs4118325	0.908	rs11185038	chr1:107558043	NTNG1	chr1:107682629-108024471:+	0.21	3.54	0.000437	AIDS
PRAD	rs12060904	chr1:107206300	T/G	NTNG1	chr1:107682629-108026080:+	0.34	3.45	0.000613		THCA	cis	rs4118325	0.908	rs11185040	chr1:107558180	NTNG1	chr1:107682629-108024471:+	0.21	3.54	0.000437	AIDS
PRAD	rs12062790	chr1:107208406	A/G	NTNG1	chr1:107682629-108026080:+	0.34	3.45	0.000613		THCA	cis	rs4118325	0.818	rs11185041	chr1:107559350	NTNG1	chr1:107682629-108024471:+	0.21	3.65	0.000292	AIDS
PRAD	rs12063720	chr1:107208081	T/C	NTNG1	chr1:107682629-108026080:+	0.34	3.45	0.000613		THCA	cis	rs4118325	0.908	rs11185042	chr1:107559559	NTNG1	chr1:107682629-108024471:+	0.21	3.65	0.000292	AIDS
PRAD	rs12063902	chr1:107208466	T/C	NTNG1	chr1:107682629-108026080:+	0.34	3.45	0.000613		THCA	cis	rs4118325	0.863	rs11185043	chr1:107560292	NTNG1	chr1:107682629-108024471:+	-0.21	-3.64	0.000303	AIDS
PRAD	rs12065128	chr1:107201593	G/T	NTNG1	chr1:107682629-108026080:+	0.36	3.47	0.000559		THCA	cis	rs4118325	0.908	rs11185045	chr1:107560639	NTNG1	chr1:107682629-108024471:+	0.22	3.76	0.000189	AIDS
PRAD	rs12066188	chr1:107207603	G/A	NTNG1	chr1:107682629-108026080:+	0.36	3.47	0.000559		THCA	cis	rs4118325	0.954	rs11185046	chr1:107561258	NTNG1	chr1:107682629-108024471:+	0.22	3.77	0.000185	AIDS
PRAD	rs12066688	chr1:107216073	A/G	NTNG1	chr1:107682629-108026080:+	0.34	3.45	0.000613		THCA	cis	rs4118325	0.909	rs11185047	chr1:107562398	NTNG1	chr1:107682629-108024471:+	0.22	3.77	0.000185	AIDS
PRAD	rs12074685	chr1:107213259	G/T	NTNG1	chr1:107682629-108026080:+	0.36	3.47	0.000559		THCA	cis	rs4118325	0.909	rs11185048	chr1:107562404	NTNG1	chr1:107682629-108024471:+	0.22	3.77	0.000185	AIDS
PRAD	rs12077984	chr1:107208268	C/G	NTNG1	chr1:107682629-108026080:+	0.36	3.47	0.000559		THCA	cis	rs4118325	0.954	rs11185049	chr1:107562556	NTNG1	chr1:107682629-108024471:+	0.21	3.63	0.000319	AIDS
PRAD	rs12079433	chr1:107209364	C/T	NTNG1	chr1:107682629-108026080:+	0.34	3.45	0.000613		THCA	cis	rs4118325	0.908	rs11185050	chr1:107564543	NTNG1	chr1:107682629-108024471:+	0.22	3.77	0.000185	AIDS
PRAD	rs12092049	chr1:107660849	T/C	NTNG1	chr1:107682629-108026080:+	0.34	4.3	2.08e-05		THCA	cis	rs4118325	0.954	rs11185051	chr1:107565856	NTNG1	chr1:107682629-108024471:+	0.22	3.77	0.000185	AIDS
PRAD	rs12097796	chr1:107667203	G/A	NTNG1	chr1:107682629-108026080:+	0.29	3.6	0.000356		THCA	cis	rs4118325	0.954	rs11185053	chr1:107567038	NTNG1	chr1:107682629-108024471:+	0.22	3.77	0.000185	AIDS
PRAD	rs12121000	chr1:107594633	C/A	NTNG1	chr1:107682629-108026080:+	-0.21	-3.53	0.000462		THCA	cis	rs4118325	0.909	rs11185054	chr1:107570335	NTNG1	chr1:107682629-108024471:+	0.21	3.62	0.000322	AIDS
PRAD	rs12124885	chr1:107191879	C/T	NTNG1	chr1:107682629-108026080:+	-0.25	-4.07	5.5e-05		THCA	cis	rs4118325	0.954	rs11185055	chr1:107570555	NTNG1	chr1:107682629-108024471:+	0.21	3.66	0.000281	AIDS
PRAD	rs12137532	chr1:107180825	A/C	NTNG1	chr1:107682629-108026080:+	-0.23	-3.66	0.000278		THCA	cis	rs4118325	1	rs11185056	chr1:107578610	NTNG1	chr1:107682629-108024471:+	0.21	3.37	0.000806	AIDS
PRAD	rs12736937	chr1:107198816	C/T	NTNG1	chr1:107682629-108026080:+	-0.25	-4.1	4.84e-05		THCA	cis	rs4118325	1	rs11185057	chr1:107596964	NTNG1	chr1:107682629-108024471:+	0.2	3.48	0.000541	AIDS
PRAD	rs12741943	chr1:107187023	G/A	NTNG1	chr1:107682629-108026080:+	-0.24	-3.81	0.000157		THCA	cis	rs4118325	1	rs11185058	chr1:107603269	NTNG1	chr1:107682629-108024471:+	0.2	3.55	0.00043	AIDS
PRAD	rs1335061	chr1:107590574	C/T	NTNG1	chr1:107682629-108026080:+	-0.23	-3.77	0.000184		THCA	cis	rs4118325	0.908	rs11578885	chr1:107556097	NTNG1	chr1:107682629-108024471:+	0.21	3.47	0.000571	AIDS
PRAD	rs145614063	chr1:107208160	CA/C	NTNG1	chr1:107682629-108026080:+	0.34	3.44	0.00063		THCA	cis	rs4118325	0.908	rs11579320	chr1:107556101	NTNG1	chr1:107682629-108024471:+	0.21	3.47	0.000571	AIDS
PRAD	rs1632771	chr1:107648423	G/T	NTNG1	chr1:107682629-108026080:+	-0.3	-3.81	0.00016		THCA	cis	rs12097821	0.551	rs116005440	chr1:107208722	NTNG1	chr1:107682629-108024471:+	0.43	4.27	2.35e-05	Non-obstructive azoospermia
PRAD	rs1730868	chr1:107647398	C/T	NTNG1	chr1:107682629-108026080:+	-0.3	-3.77	0.000185		THCA	cis	rs4118325	0.584	rs11806506	chr1:107507073	NTNG1	chr1:107682629-108024471:+	0.2	3.55	0.000419	AIDS
PRAD	rs17486419	chr1:106943366	C/A	NTNG1	chr1:107682629-108026080:+	0.36	3.51	0.000487		THCA	cis	rs4118325	1	rs12021578	chr1:107597501	NTNG1	chr1:107682629-108024471:+	0.21	3.62	0.00033	AIDS
PRAD	rs1762500	chr1:107649367	T/A	NTNG1	chr1:107682629-108026080:+	-0.31	-3.88	0.000117		THCA	cis	rs4118325	0.908	rs12025549	chr1:107554671	NTNG1	chr1:107682629-108024471:+	0.21	3.47	0.000571	AIDS
PRAD	rs1762501	chr1:107649582	A/C	NTNG1	chr1:107682629-108026080:+	-0.3	-3.81	0.00016		THCA	cis	rs4118325	0.908	rs12026762	chr1:107550184	NTNG1	chr1:107682629-108024471:+	0.21	3.45	0.000606	AIDS
PRAD	rs1819548	chr1:107639318	G/A	NTNG1	chr1:107682629-108026080:+	-0.28	-3.51	0.000496		THCA	cis	rs4118325	0.908	rs12026795	chr1:107550281	NTNG1	chr1:107682629-108024471:+	0.21	3.45	0.000606	AIDS
PRAD	rs34389647	chr1:107182922	G/GA	NTNG1	chr1:107682629-108026080:+	-0.27	-4.29	2.13e-05		THCA	cis	rs4118325	0.908	rs12026861	chr1:107556645	NTNG1	chr1:107682629-108024471:+	0.21	3.36	0.00084	AIDS
PRAD	rs35817131	chr1:107559668	T/TCTC	NTNG1	chr1:107682629-108026080:+	0.23	3.87	0.000126		THCA	cis	rs4118325	0.863	rs12026889	chr1:107550576	NTNG1	chr1:107682629-108024471:+	0.21	3.46	0.000579	AIDS
PRAD	rs35888515	chr1:107187001	G/A	NTNG1	chr1:107682629-108026080:+	-0.23	-3.67	0.000273		THCA	cis	rs4118325	0.908	rs12028463	chr1:107549818	NTNG1	chr1:107682629-108024471:+	0.22	3.52	0.000476	AIDS
PRAD	rs4130969	chr1:107183812	C/A	NTNG1	chr1:107682629-108026080:+	-0.24	-3.79	0.000171		THCA	cis	rs4118325	0.954	rs12031402	chr1:107565776	NTNG1	chr1:107682629-108024471:+	0.22	3.77	0.000185	AIDS
PRAD	rs4388724	chr1:107182165	C/A	NTNG1	chr1:107682629-108026080:+	-0.26	-4.1	4.8e-05		THCA	cis	rs4118325	0.908	rs12031779	chr1:107545845	NTNG1	chr1:107682629-108024471:+	0.21	3.34	0.000905	AIDS
PRAD	rs4393187	chr1:107182505	A/T	NTNG1	chr1:107682629-108026080:+	-0.27	-4.29	2.13e-05		THCA	cis	rs4118325	0.908	rs12032059	chr1:107558304	NTNG1	chr1:107682629-108024471:+	0.21	3.54	0.000437	AIDS
PRAD	rs4606343	chr1:107222208	A/C	NTNG1	chr1:107682629-108026080:+	-0.25	-4.09	5.08e-05		THCA	cis	rs4118325	0.954	rs12033865	chr1:107563675	NTNG1	chr1:107682629-108024471:+	0.22	3.77	0.000185	AIDS
PRAD	rs55885362	chr1:107206882	C/A	NTNG1	chr1:107682629-108026080:+	0.34	3.45	0.000613		THCA	cis	rs4118325	0.954	rs12034643	chr1:107563695	NTNG1	chr1:107682629-108024471:+	0.21	3.56	0.000406	AIDS
PRAD	rs5776857	chr1:107182403	G/GA	NTNG1	chr1:107682629-108026080:+	-0.26	-4.25	2.6e-05		THCA	cis	rs4118325	0.954	rs12034825	chr1:107566845	NTNG1	chr1:107682629-108024471:+	0.22	3.77	0.000185	AIDS
PRAD	rs6656996	chr1:107666980	T/C	NTNG1	chr1:107682629-108026080:+	0.29	3.62	0.000322		THCA	cis	rs4118325	0.954	rs12036250	chr1:107570243	NTNG1	chr1:107682629-108024471:+	0.21	3.62	0.000322	AIDS
PRAD	rs6662026	chr1:107669666	A/C	NTNG1	chr1:107682629-108026080:+	0.26	3.49	0.000522		THCA	cis	rs4118325	0.908	rs12048389	chr1:107538723	NTNG1	chr1:107682629-108024471:+	0.22	3.57	0.000391	AIDS
PRAD	rs6680047	chr1:107624653	A/T	NTNG1	chr1:107682629-108026080:+	0.21	3.57	0.000387		THCA	cis	rs4118325	0.603	rs12079405	chr1:107693757	NTNG1	chr1:107682629-108024471:+	0.3	4.28	2.26e-05	AIDS
PRAD	rs6685716	chr1:107553330	A/C	NTNG1	chr1:107682629-108026080:+	0.23	4	7.51e-05		THCA	cis	rs4118325	0.584	rs12238976	chr1:107509520	NTNG1	chr1:107682629-108024471:+	0.2	3.55	0.000419	AIDS
PRAD	rs71764148	chr1:107661817	AAGT/A	NTNG1	chr1:107682629-108026080:+	0.33	4.15	4e-05		THCA	cis	rs4118325	0.908	rs12729458	chr1:107553468	NTNG1	chr1:107682629-108024471:+	0.22	3.6	0.000347	AIDS
PRAD	rs72982130	chr1:107207111	C/T	NTNG1	chr1:107682629-108026080:+	0.34	3.45	0.000613		THCA	cis	rs4118325	0.734	rs12733850	chr1:107535804	NTNG1	chr1:107682629-108024471:+	0.23	3.8	0.000165	AIDS
PRAD	rs72982144	chr1:107213759	G/A	NTNG1	chr1:107682629-108026080:+	0.36	3.47	0.000559		THCA	cis	rs4118325	0.697	rs12733859	chr1:107535825	NTNG1	chr1:107682629-108024471:+	0.2	3.54	0.000441	AIDS
PRAD	rs72982148	chr1:107216419	A/C	NTNG1	chr1:107682629-108026080:+	0.34	3.45	0.000613		THCA	cis	rs4118325	0.603	rs12743478	chr1:107701106	NTNG1	chr1:107682629-108024471:+	0.27	3.74	0.000203	AIDS
PRAD	rs7514481	chr1:107665433	C/T	NTNG1	chr1:107682629-108026080:+	0.3	3.82	0.000154		THCA	cis	rs4118325	0.584	rs12744895	chr1:107534242	NTNG1	chr1:107682629-108024471:+	0.2	3.44	0.000634	AIDS
PRAD	rs7515817	chr1:107204738	G/A	NTNG1	chr1:107682629-108026080:+	0.36	3.47	0.000559		THCA	cis	rs4118325	0.908	rs12749984	chr1:107555408	NTNG1	chr1:107682629-108024471:+	0.21	3.47	0.000571	AIDS
PRAD	rs7516742	chr1:107243182	A/G	NTNG1	chr1:107682629-108026080:+	-0.25	-4.17	3.64e-05		THCA	cis	rs4118325	0.584	rs12756867	chr1:107523637	NTNG1	chr1:107682629-108024471:+	0.2	3.42	0.00067	AIDS
PRAD	rs7537866	chr1:107665479	C/T	NTNG1	chr1:107682629-108026080:+	0.3	3.84	0.000139		THCA	cis	rs4118325	1	rs17018185	chr1:107579295	NTNG1	chr1:107682629-108024471:+	0.21	3.68	0.00026	AIDS
PRAD	rs80211416	chr1:107212319	G/T	NTNG1	chr1:107682629-108026080:+	0.36	3.47	0.000559		THCA	cis	rs4118325	0.908	rs2078572	chr1:107547485	NTNG1	chr1:107682629-108024471:+	0.21	3.38	0.000795	AIDS
STAD	rs5023291	chr1:107721577	C/A	NTNG1	chr1:107682629-108026080:+	-0.24	-3.84	0.000146		THCA	cis	rs12097821	0.304	rs2203911	chr1:107439019	NTNG1	chr1:107682629-108024471:+	0.29	3.56	0.000416	Non-obstructive azoospermia
STAD	rs71764148	chr1:107661817	AAGT/A	NTNG1	chr1:107682629-108026080:+	0.26	3.82	0.000157		THCA	cis	rs4118325	0.908	rs2878350	chr1:107548729	NTNG1	chr1:107682629-108024471:+	0.21	3.38	0.000789	AIDS
STAD	rs746603	chr1:107931160	A/G	NTNG1	chr1:107682629-108026080:+	0.21	3.91	0.000109		THCA	cis	rs4118325	0.908	rs2878351	chr1:107548509	NTNG1	chr1:107682629-108024471:+	-0.2	-3.35	0.000885	AIDS
STAD	rs76259395	chr1:107666942	A/G	NTNG1	chr1:107682629-108026080:+	0.3	4.22	3.05e-05		THCA	cis	rs4118325	0.954	rs3108679	chr1:107565593	NTNG1	chr1:107682629-108024471:+	0.2	3.4	0.00074	AIDS
THCA	rs10047147	chr1:107561147	C/T	NTNG1	chr1:107682629-108026080:+	0.22	3.77	0.000185		THCA	cis	rs4118325	0.954	rs3128749	chr1:107564086	NTNG1	chr1:107682629-108024471:+	-0.21	-3.56	0.000413	AIDS
THCA	rs10218457	chr1:107571244	A/G	NTNG1	chr1:107682629-108026080:+	0.2	3.39	0.000754		THCA	cis	rs4118325	0.584	rs34531781	chr1:107522860	NTNG1	chr1:107682629-108024471:+	0.19	3.43	0.000657	AIDS
THCA	rs10218458	chr1:107571327	A/G	NTNG1	chr1:107682629-108026080:+	0.2	3.39	0.000746		THCA	cis	rs4118325	0.908	rs34576622	chr1:107553670	NTNG1	chr1:107682629-108024471:+	0.21	3.47	0.000571	AIDS
THCA	rs10218763	chr1:107571159	C/T	NTNG1	chr1:107682629-108026080:+	0.2	3.43	0.000647		THCA	cis	rs4118325	0.584	rs35057312	chr1:107510267	NTNG1	chr1:107682629-108024471:+	0.22	3.74	0.000206	AIDS
THCA	rs10458533	chr1:107560034	C/T	NTNG1	chr1:107682629-108026080:+	0.22	3.73	0.000219		THCA	cis	rs4118325	1	rs3791185	chr1:107600869	NTNG1	chr1:107682629-108024471:+	0.2	3.36	0.000849	AIDS
THCA	rs10494056	chr1:107547919	C/A	NTNG1	chr1:107682629-108026080:+	0.21	3.38	0.000795		THCA	cis	rs4118325	0.908	rs3850612	chr1:107551105	NTNG1	chr1:107682629-108024471:+	0.21	3.48	0.00054	AIDS
THCA	rs10494057	chr1:107576399	A/C	NTNG1	chr1:107682629-108026080:+	0.2	3.45	0.000607		THCA	cis	rs4118325	0.908	rs4084427	chr1:107554473	NTNG1	chr1:107682629-108024471:+	0.21	3.47	0.000571	AIDS
THCA	rs10680631	chr1:107567942	A/AAAAC	NTNG1	chr1:107682629-108026080:+	0.25	4.11	4.63e-05		THCA	cis	rs4118325	0.908	rs4084428	chr1:107554421	NTNG1	chr1:107682629-108024471:+	0.21	3.45	0.000613	AIDS
THCA	rs10785814	chr1:107610540	A/G	NTNG1	chr1:107682629-108026080:+	0.22	3.78	0.000175		THCA	cis	rs4118325	0.908	rs4084429	chr1:107551386	NTNG1	chr1:107682629-108024471:+	0.21	3.45	0.000606	AIDS
THCA	rs10881455	chr1:107561546	G/A	NTNG1	chr1:107682629-108026080:+	0.22	3.77	0.000185		THCA	cis	rs4118325	0.908	rs4096994	chr1:107547291	NTNG1	chr1:107682629-108024471:+	0.21	3.38	0.000795	AIDS
THCA	rs11185037	chr1:107543055	G/T	NTNG1	chr1:107682629-108026080:+	0.22	3.58	0.000383		THCA	cis	rs4118325	0.954	rs4096996	chr1:107564415	NTNG1	chr1:107682629-108024471:+	-0.22	-3.71	0.000233	AIDS
THCA	rs11185038	chr1:107558043	C/T	NTNG1	chr1:107682629-108026080:+	0.21	3.54	0.000437		THCA	cis	rs4118325	0.954	rs4118320	chr1:107564449	NTNG1	chr1:107682629-108024471:+	-0.21	-3.56	0.000406	AIDS
THCA	rs11185040	chr1:107558180	C/T	NTNG1	chr1:107682629-108026080:+	0.21	3.54	0.000437		THCA	cis	rs4118325	0.954	rs4118321	chr1:107569913	NTNG1	chr1:107682629-108024471:+	0.22	3.68	0.000259	AIDS
THCA	rs11185041	chr1:107559350	A/G	NTNG1	chr1:107682629-108026080:+	0.21	3.65	0.000292		THCA	cis	rs4118325	1	rs4118325	chr1:107577832	NTNG1	chr1:107682629-108024471:+	0.21	3.69	0.000247	AIDS
THCA	rs11185042	chr1:107559559	A/G	NTNG1	chr1:107682629-108026080:+	0.21	3.65	0.000292		THCA	cis	rs4118325	0.603	rs4915017	chr1:107701368	NTNG1	chr1:107682629-108024471:+	0.27	3.74	0.000203	AIDS
THCA	rs11185043	chr1:107560292	A/T	NTNG1	chr1:107682629-108026080:+	-0.21	-3.64	0.000303		THCA	cis	rs4118325	0.562	rs4915018	chr1:107703913	NTNG1	chr1:107682629-108024471:+	0.26	3.44	0.000636	AIDS
THCA	rs11185044	chr1:107560570	T/C	NTNG1	chr1:107682629-108026080:+	0.22	3.73	0.000217		THCA	cis	rs4118325	0.954	rs58301070	chr1:107566307	NTNG1	chr1:107682629-108024471:+	0.21	3.56	0.000406	AIDS
THCA	rs11185045	chr1:107560639	G/C	NTNG1	chr1:107682629-108026080:+	0.22	3.76	0.000189		THCA	cis	rs4118325	0.954	rs58429886	chr1:107566429	NTNG1	chr1:107682629-108024471:+	0.21	3.56	0.000406	AIDS
THCA	rs11185046	chr1:107561258	T/C	NTNG1	chr1:107682629-108026080:+	0.22	3.77	0.000185		THCA	cis	rs4118325	0.954	rs59163235	chr1:107566570	NTNG1	chr1:107682629-108024471:+	0.22	3.77	0.000185	AIDS
THCA	rs11185047	chr1:107562398	C/T	NTNG1	chr1:107682629-108026080:+	0.22	3.77	0.000185		THCA	cis	rs4118325	0.863	rs59644024	chr1:107552970	NTNG1	chr1:107682629-108024471:+	0.21	3.44	0.000641	AIDS
THCA	rs11185048	chr1:107562404	G/A	NTNG1	chr1:107682629-108026080:+	0.22	3.77	0.000185		THCA	cis	rs4118325	0.908	rs60763200	chr1:107552974	NTNG1	chr1:107682629-108024471:+	0.21	3.44	0.000641	AIDS
THCA	rs11185049	chr1:107562556	A/G	NTNG1	chr1:107682629-108026080:+	0.21	3.63	0.000319		THCA	cis	rs4118325	0.908	rs61797709	chr1:107551976	NTNG1	chr1:107682629-108024471:+	0.21	3.45	0.000606	AIDS
THCA	rs11185050	chr1:107564543	G/A	NTNG1	chr1:107682629-108026080:+	0.22	3.77	0.000185		THCA	cis	rs4118325	0.603	rs61800175	chr1:107693580	NTNG1	chr1:107682629-108024471:+	0.31	4.23	2.81e-05	AIDS
THCA	rs11185051	chr1:107565856	C/T	NTNG1	chr1:107682629-108026080:+	0.22	3.77	0.000185		THCA	cis	rs4118325	0.522	rs61800176	chr1:107693584	NTNG1	chr1:107682629-108024471:+	0.31	4.23	2.81e-05	AIDS
THCA	rs11185052	chr1:107565976	T/A	NTNG1	chr1:107682629-108026080:+	0.22	3.77	0.000185		THCA	cis	rs4118325	0.562	rs61800177	chr1:107703530	NTNG1	chr1:107682629-108024471:+	0.26	3.47	0.000561	AIDS
THCA	rs11185053	chr1:107567038	A/T	NTNG1	chr1:107682629-108026080:+	0.22	3.77	0.000185		THCA	cis	rs4118325	0.954	rs6583004	chr1:107568324	NTNG1	chr1:107682629-108024471:+	0.22	3.77	0.000185	AIDS
THCA	rs11185054	chr1:107570335	A/C	NTNG1	chr1:107682629-108026080:+	0.21	3.62	0.000322		THCA	cis	rs4118325	0.603	rs6657710	chr1:107698007	NTNG1	chr1:107682629-108024471:+	0.3	4.22	2.87e-05	AIDS
THCA	rs11185055	chr1:107570555	A/G	NTNG1	chr1:107682629-108026080:+	0.21	3.66	0.000281		THCA	cis	rs4118325	0.954	rs6658603	chr1:107567539	NTNG1	chr1:107682629-108024471:+	0.22	3.77	0.000185	AIDS
THCA	rs11185056	chr1:107578610	C/G	NTNG1	chr1:107682629-108026080:+	0.21	3.37	0.000806		THCA	cis	rs4118325	0.954	rs6659571	chr1:107568582	NTNG1	chr1:107682629-108024471:+	0.21	3.56	0.000406	AIDS
THCA	rs11185057	chr1:107596964	T/C	NTNG1	chr1:107682629-108026080:+	0.2	3.48	0.000541		THCA	cis	rs4118325	0.954	rs6660059	chr1:107565314	NTNG1	chr1:107682629-108024471:+	0.22	3.77	0.000185	AIDS
THCA	rs11185058	chr1:107603269	C/T	NTNG1	chr1:107682629-108026080:+	0.2	3.55	0.00043		THCA	cis	rs4118325	0.954	rs6662394	chr1:107568974	NTNG1	chr1:107682629-108024471:+	0.22	3.77	0.000185	AIDS
THCA	rs11185059	chr1:107611742	T/G	NTNG1	chr1:107682629-108026080:+	0.21	3.61	0.000332		THCA	cis	rs4118325	0.954	rs6665355	chr1:107569271	NTNG1	chr1:107682629-108024471:+	0.22	3.77	0.000185	AIDS
THCA	rs11333639	chr1:107565366	TG/T	NTNG1	chr1:107682629-108026080:+	0.22	3.77	0.000185		THCA	cis	rs4118325	0.863	rs6673500	chr1:107551549	NTNG1	chr1:107682629-108024471:+	0.21	3.45	0.000606	AIDS
THCA	rs11578885	chr1:107556097	A/G	NTNG1	chr1:107682629-108026080:+	0.21	3.47	0.000571		THCA	cis	rs4118325	0.908	rs6675948	chr1:107557477	NTNG1	chr1:107682629-108024471:+	0.2	3.35	0.000883	AIDS
THCA	rs11579320	chr1:107556101	T/C	NTNG1	chr1:107682629-108026080:+	0.21	3.47	0.000571		THCA	cis	rs4118325	0.909	rs6678520	chr1:107563463	NTNG1	chr1:107682629-108024471:+	0.22	3.77	0.000185	AIDS
THCA	rs116005440	chr1:107208722	G/T	NTNG1	chr1:107682629-108026080:+	0.43	4.27	2.35e-05		THCA	cis	rs4118325	0.908	rs6681323	chr1:107555097	NTNG1	chr1:107682629-108024471:+	0.21	3.47	0.000571	AIDS
THCA	rs11806506	chr1:107507073	A/T	NTNG1	chr1:107682629-108026080:+	0.2	3.55	0.000419		THCA	cis	rs4118325	1	rs6684571	chr1:107623224	NTNG1	chr1:107682629-108024471:+	0.21	3.61	0.000334	AIDS
THCA	rs12021578	chr1:107597501	G/A	NTNG1	chr1:107682629-108026080:+	0.21	3.62	0.00033		THCA	cis	rs4118325	0.908	rs6689110	chr1:107552068	NTNG1	chr1:107682629-108024471:+	0.21	3.45	0.000606	AIDS
THCA	rs12025549	chr1:107554671	T/C	NTNG1	chr1:107682629-108026080:+	0.21	3.47	0.000571		THCA	cis	rs4118325	0.584	rs6690911	chr1:107533423	NTNG1	chr1:107682629-108024471:+	-0.2	-3.44	0.00064	AIDS
THCA	rs12026762	chr1:107550184	T/C	NTNG1	chr1:107682629-108026080:+	0.21	3.45	0.000606		THCA	cis	rs4118325	0.954	rs6692055	chr1:107567438	NTNG1	chr1:107682629-108024471:+	0.22	3.77	0.000185	AIDS
THCA	rs12026795	chr1:107550281	T/A	NTNG1	chr1:107682629-108026080:+	0.21	3.45	0.000606		THCA	cis	rs4118325	0.909	rs6692243	chr1:107567574	NTNG1	chr1:107682629-108024471:+	0.22	3.77	0.000185	AIDS
THCA	rs12026861	chr1:107556645	A/T	NTNG1	chr1:107682629-108026080:+	0.21	3.36	0.00084		THCA	cis	rs4118325	0.863	rs6692265	chr1:107555104	NTNG1	chr1:107682629-108024471:+	0.21	3.47	0.000571	AIDS
THCA	rs12026889	chr1:107550576	T/A	NTNG1	chr1:107682629-108026080:+	0.21	3.46	0.000579		THCA	cis	rs4118325	0.563	rs6694067	chr1:107698197	NTNG1	chr1:107682629-108024471:+	-0.3	-4.27	2.34e-05	AIDS
THCA	rs12028463	chr1:107549818	G/A	NTNG1	chr1:107682629-108026080:+	0.22	3.52	0.000476		THCA	cis	rs4118325	0.954	rs6694685	chr1:107564826	NTNG1	chr1:107682629-108024471:+	0.22	3.77	0.000185	AIDS
THCA	rs12029196	chr1:107550057	G/A	NTNG1	chr1:107682629-108026080:+	0.21	3.48	0.00054		THCA	cis	rs4118325	0.908	rs6699181	chr1:107557232	NTNG1	chr1:107682629-108024471:+	0.21	3.53	0.000453	AIDS
THCA	rs12031402	chr1:107565776	T/G	NTNG1	chr1:107682629-108026080:+	0.22	3.77	0.000185		THCA	cis	rs4118325	0.909	rs6700165	chr1:107565295	NTNG1	chr1:107682629-108024471:+	0.22	3.77	0.000185	AIDS
THCA	rs12031631	chr1:107560407	T/C	NTNG1	chr1:107682629-108026080:+	0.21	3.7	0.000239		THCA	cis	rs4118325	0.954	rs6701429	chr1:107563012	NTNG1	chr1:107682629-108024471:+	0.22	3.77	0.000185	AIDS
THCA	rs12031779	chr1:107545845	C/T	NTNG1	chr1:107682629-108026080:+	0.21	3.34	0.000905		THCA	cis	rs4118325	0.908	rs6701622	chr1:107563192	NTNG1	chr1:107682629-108024471:+	0.22	3.77	0.000185	AIDS
THCA	rs12032059	chr1:107558304	G/A	NTNG1	chr1:107682629-108026080:+	0.21	3.54	0.000437		THCA	cis	rs4118325	0.584	rs71673396	chr1:107507403	NTNG1	chr1:107682629-108024471:+	0.22	3.74	0.000206	AIDS
THCA	rs12032640	chr1:107567740	A/C	NTNG1	chr1:107682629-108026080:+	0.22	3.77	0.000185		THCA	cis	rs12097821	0.673	rs72982124	chr1:107202420	NTNG1	chr1:107682629-108024471:+	0.26	3.34	0.000898	Non-obstructive azoospermia
THCA	rs12033865	chr1:107563675	A/G	NTNG1	chr1:107682629-108026080:+	0.22	3.77	0.000185		THCA	cis	rs4118325	1	rs7543089	chr1:107591693	NTNG1	chr1:107682629-108024471:+	0.2	3.5	0.000506	AIDS
THCA	rs12033985	chr1:107560375	G/A	NTNG1	chr1:107682629-108026080:+	0.22	3.83	0.000146		THCA	cis	rs4118325	0.954	rs7546611	chr1:107563752	NTNG1	chr1:107682629-108024471:+	0.22	3.77	0.000185	AIDS
THCA	rs12034643	chr1:107563695	T/C	NTNG1	chr1:107682629-108026080:+	0.21	3.56	0.000406		THCA	cis	rs4118325	0.954	rs7547872	chr1:107568010	NTNG1	chr1:107682629-108024471:+	0.22	3.77	0.000185	AIDS
THCA	rs12034825	chr1:107566845	G/A	NTNG1	chr1:107682629-108026080:+	0.22	3.77	0.000185		THCA	cis	rs4118325	0.774	rs76259395	chr1:107666942	NTNG1	chr1:107682629-108024471:+	0.28	3.92	0.000101	AIDS
THCA	rs12035831	chr1:107567747	G/T	NTNG1	chr1:107682629-108026080:+	0.22	3.77	0.000185		THCA	cis	rs4118325	0.5	rs77477013	chr1:107506289	NTNG1	chr1:107682629-108024471:+	0.22	3.85	0.000133	AIDS
THCA	rs12036250	chr1:107570243	T/C	NTNG1	chr1:107682629-108026080:+	0.21	3.62	0.000322		THCA	cis	rs12097821	0.551	rs77491500	chr1:107247090	NTNG1	chr1:107682629-108024471:+	0.43	4.24	2.63e-05	Non-obstructive azoospermia
THCA	rs12048389	chr1:107538723	T/C	NTNG1	chr1:107682629-108026080:+	0.22	3.57	0.000391		THCA	cis	rs12097821	0.551	rs80042192	chr1:107229984	NTNG1	chr1:107682629-108024471:+	0.43	4.24	2.63e-05	Non-obstructive azoospermia
THCA	rs12071765	chr1:107566060	A/G	NTNG1	chr1:107682629-108026080:+	0.22	3.77	0.000185		THCA	cis	rs4118325	0.954	rs9662586	chr1:107597961	NTNG1	chr1:107682629-108024471:+	0.21	3.65	0.000293	AIDS
THCA	rs12079405	chr1:107693757	G/A	NTNG1	chr1:107682629-108026080:+	0.3	4.28	2.26e-05
THCA	rs12238976	chr1:107509520	C/A	NTNG1	chr1:107682629-108026080:+	0.2	3.55	0.000419
THCA	rs12725701	chr1:107555851	G/A	NTNG1	chr1:107682629-108026080:+	0.21	3.47	0.000571
THCA	rs12729458	chr1:107553468	A/C	NTNG1	chr1:107682629-108026080:+	0.22	3.6	0.000347
THCA	rs12733850	chr1:107535804	A/T	NTNG1	chr1:107682629-108026080:+	0.23	3.8	0.000165
THCA	rs12733859	chr1:107535825	A/T	NTNG1	chr1:107682629-108026080:+	0.2	3.54	0.000441
THCA	rs12743478	chr1:107701106	C/T	NTNG1	chr1:107682629-108026080:+	0.27	3.74	0.000203
THCA	rs12744895	chr1:107534242	G/A	NTNG1	chr1:107682629-108026080:+	0.2	3.44	0.000634
THCA	rs12749984	chr1:107555408	T/C	NTNG1	chr1:107682629-108026080:+	0.21	3.47	0.000571
THCA	rs12750677	chr1:107555863	T/C	NTNG1	chr1:107682629-108026080:+	0.21	3.47	0.000571
THCA	rs12756867	chr1:107523637	T/C	NTNG1	chr1:107682629-108026080:+	0.2	3.42	0.00067
THCA	rs144466731	chr1:107475234	C/G	NTNG1	chr1:107682629-108026080:+	0.31	3.8	0.000161
THCA	rs145143168	chr1:107255369	C/CT	NTNG1	chr1:107682629-108026080:+	0.43	4.24	2.63e-05
THCA	rs146183588	chr1:107252564	G/GT	NTNG1	chr1:107682629-108026080:+	0.41	4.12	4.47e-05
THCA	rs147981879	chr1:107475240	G/A	NTNG1	chr1:107682629-108026080:+	0.33	4.06	5.77e-05
THCA	rs148373759	chr1:107621792	T/TTTGGCATATTTATGTTA	NTNG1	chr1:107682629-108026080:+	0.21	3.61	0.000334
THCA	rs17018185	chr1:107579295	A/C	NTNG1	chr1:107682629-108026080:+	0.21	3.68	0.00026
THCA	rs2078572	chr1:107547485	C/A	NTNG1	chr1:107682629-108026080:+	0.21	3.38	0.000795
THCA	rs2203911	chr1:107439019	T/C	NTNG1	chr1:107682629-108026080:+	0.29	3.56	0.000416
THCA	rs2335081	chr1:107535449	C/A	NTNG1	chr1:107682629-108026080:+	-0.2	-3.57	0.000387
THCA	rs2878350	chr1:107548729	T/G	NTNG1	chr1:107682629-108026080:+	0.21	3.38	0.000789
THCA	rs2878351	chr1:107548509	C/T	NTNG1	chr1:107682629-108026080:+	-0.2	-3.35	0.000885
THCA	rs3108679	chr1:107565593	C/G	NTNG1	chr1:107682629-108026080:+	0.2	3.4	0.00074
THCA	rs3128749	chr1:107564086	A/G	NTNG1	chr1:107682629-108026080:+	-0.21	-3.56	0.000413
THCA	rs33999844	chr1:107561795	TAG/T	NTNG1	chr1:107682629-108026080:+	0.22	3.77	0.000185
THCA	rs34038473	chr1:107548120	TA/T	NTNG1	chr1:107682629-108026080:+	0.21	3.42	0.000676
THCA	rs345298	chr1:108436557	C/T	NTNG1	chr1:107682629-108026080:+	0.18	3.79	0.000169
THCA	rs34531781	chr1:107522860	C/T	NTNG1	chr1:107682629-108026080:+	0.19	3.43	0.000657
THCA	rs34576622	chr1:107553670	A/G	NTNG1	chr1:107682629-108026080:+	0.21	3.47	0.000571
THCA	rs34776239	chr1:107548214	AT/A	NTNG1	chr1:107682629-108026080:+	0.21	3.38	0.000795
THCA	rs34812785	chr1:107548428	A/AC	NTNG1	chr1:107682629-108026080:+	0.21	3.38	0.000789
THCA	rs35057312	chr1:107510267	C/A	NTNG1	chr1:107682629-108026080:+	0.22	3.74	0.000206
THCA	rs35305249	chr1:107567012	TACTC/T	NTNG1	chr1:107682629-108026080:+	0.22	3.82	0.000149
THCA	rs36077475	chr1:107242419	A/ATT	NTNG1	chr1:107682629-108026080:+	0.42	4.15	4e-05
THCA	rs3791185	chr1:107600869	G/A	NTNG1	chr1:107682629-108026080:+	0.2	3.36	0.000849
THCA	rs3850612	chr1:107551105	A/G	NTNG1	chr1:107682629-108026080:+	0.21	3.48	0.00054
THCA	rs4084427	chr1:107554473	A/G	NTNG1	chr1:107682629-108026080:+	0.21	3.47	0.000571
THCA	rs4084428	chr1:107554421	T/C	NTNG1	chr1:107682629-108026080:+	0.21	3.45	0.000613
THCA	rs4084429	chr1:107551386	C/T	NTNG1	chr1:107682629-108026080:+	0.21	3.45	0.000606
THCA	rs4096994	chr1:107547291	A/G	NTNG1	chr1:107682629-108026080:+	0.21	3.38	0.000795
THCA	rs4096996	chr1:107564415	A/G	NTNG1	chr1:107682629-108026080:+	-0.22	-3.71	0.000233
THCA	rs4118320	chr1:107564449	A/G	NTNG1	chr1:107682629-108026080:+	-0.21	-3.56	0.000406
THCA	rs4118321	chr1:107569913	A/G	NTNG1	chr1:107682629-108026080:+	0.22	3.68	0.000259
THCA	rs4118325	chr1:107577832	C/T	NTNG1	chr1:107682629-108026080:+	0.21	3.69	0.000247
THCA	rs4915017	chr1:107701368	C/T	NTNG1	chr1:107682629-108026080:+	0.27	3.74	0.000203
THCA	rs4915018	chr1:107703913	G/T	NTNG1	chr1:107682629-108026080:+	0.26	3.44	0.000636
THCA	rs56311800	chr1:107979566	AT/A	NTNG1	chr1:107682629-108026080:+	0.17	3.4	0.000741
THCA	rs58301070	chr1:107566307	A/T	NTNG1	chr1:107682629-108026080:+	0.21	3.56	0.000406
THCA	rs58429886	chr1:107566429	A/C	NTNG1	chr1:107682629-108026080:+	0.21	3.56	0.000406
THCA	rs59163235	chr1:107566570	T/A	NTNG1	chr1:107682629-108026080:+	0.22	3.77	0.000185
THCA	rs59644024	chr1:107552970	T/C	NTNG1	chr1:107682629-108026080:+	0.21	3.44	0.000641
THCA	rs60763200	chr1:107552974	A/G	NTNG1	chr1:107682629-108026080:+	0.21	3.44	0.000641
THCA	rs61797709	chr1:107551976	G/A	NTNG1	chr1:107682629-108026080:+	0.21	3.45	0.000606
THCA	rs61800175	chr1:107693580	T/C	NTNG1	chr1:107682629-108026080:+	0.31	4.23	2.81e-05
THCA	rs61800176	chr1:107693584	T/C	NTNG1	chr1:107682629-108026080:+	0.31	4.23	2.81e-05
THCA	rs61800177	chr1:107703530	C/T	NTNG1	chr1:107682629-108026080:+	0.26	3.47	0.000561
THCA	rs6583004	chr1:107568324	G/C	NTNG1	chr1:107682629-108026080:+	0.22	3.77	0.000185
THCA	rs6657710	chr1:107698007	A/G	NTNG1	chr1:107682629-108026080:+	0.3	4.22	2.87e-05
THCA	rs6658603	chr1:107567539	T/C	NTNG1	chr1:107682629-108026080:+	0.22	3.77	0.000185
THCA	rs6659571	chr1:107568582	A/G	NTNG1	chr1:107682629-108026080:+	0.21	3.56	0.000406
THCA	rs6660059	chr1:107565314	G/T	NTNG1	chr1:107682629-108026080:+	0.22	3.77	0.000185
THCA	rs6660289	chr1:107565530	G/A	NTNG1	chr1:107682629-108026080:+	0.22	3.77	0.000185
THCA	rs6662394	chr1:107568974	A/G	NTNG1	chr1:107682629-108026080:+	0.22	3.77	0.000185
THCA	rs6665355	chr1:107569271	T/C	NTNG1	chr1:107682629-108026080:+	0.22	3.77	0.000185
THCA	rs6673500	chr1:107551549	C/T	NTNG1	chr1:107682629-108026080:+	0.21	3.45	0.000606
THCA	rs6675948	chr1:107557477	C/G	NTNG1	chr1:107682629-108026080:+	0.2	3.35	0.000883
THCA	rs6678520	chr1:107563463	C/T	NTNG1	chr1:107682629-108026080:+	0.22	3.77	0.000185
THCA	rs6681323	chr1:107555097	A/T	NTNG1	chr1:107682629-108026080:+	0.21	3.47	0.000571
THCA	rs6684571	chr1:107623224	G/A	NTNG1	chr1:107682629-108026080:+	0.21	3.61	0.000334
THCA	rs6685447	chr1:107565580	C/T	NTNG1	chr1:107682629-108026080:+	0.22	3.77	0.000185
THCA	rs6689110	chr1:107552068	A/T	NTNG1	chr1:107682629-108026080:+	0.21	3.45	0.000606
THCA	rs6690911	chr1:107533423	A/C	NTNG1	chr1:107682629-108026080:+	-0.2	-3.44	0.00064
THCA	rs6692055	chr1:107567438	C/A	NTNG1	chr1:107682629-108026080:+	0.22	3.77	0.000185
THCA	rs6692243	chr1:107567574	C/T	NTNG1	chr1:107682629-108026080:+	0.22	3.77	0.000185
THCA	rs6692265	chr1:107555104	G/A	NTNG1	chr1:107682629-108026080:+	0.21	3.47	0.000571
THCA	rs6694067	chr1:107698197	A/G	NTNG1	chr1:107682629-108026080:+	-0.3	-4.27	2.34e-05
THCA	rs6694685	chr1:107564826	A/T	NTNG1	chr1:107682629-108026080:+	0.22	3.77	0.000185
THCA	rs6697760	chr1:107565524	A/G	NTNG1	chr1:107682629-108026080:+	0.22	3.77	0.000182
THCA	rs6699181	chr1:107557232	G/A	NTNG1	chr1:107682629-108026080:+	0.21	3.53	0.000453
THCA	rs6700165	chr1:107565295	T/A	NTNG1	chr1:107682629-108026080:+	0.22	3.77	0.000185
THCA	rs6701429	chr1:107563012	G/T	NTNG1	chr1:107682629-108026080:+	0.22	3.77	0.000185
THCA	rs6701622	chr1:107563192	G/A	NTNG1	chr1:107682629-108026080:+	0.22	3.77	0.000185
THCA	rs71275983	chr1:107552789	C/CTT	NTNG1	chr1:107682629-108026080:+	0.22	3.59	0.000363
THCA	rs71673396	chr1:107507403	T/C	NTNG1	chr1:107682629-108026080:+	0.22	3.74	0.000206
THCA	rs72982124	chr1:107202420	C/G	NTNG1	chr1:107682629-108026080:+	0.26	3.34	0.000898
THCA	rs7543089	chr1:107591693	C/A	NTNG1	chr1:107682629-108026080:+	0.2	3.5	0.000506
THCA	rs7546611	chr1:107563752	T/C	NTNG1	chr1:107682629-108026080:+	0.22	3.77	0.000185
THCA	rs7547872	chr1:107568010	C/G	NTNG1	chr1:107682629-108026080:+	0.22	3.77	0.000185
THCA	rs76209875	chr1:107500906	G/A	NTNG1	chr1:107682629-108026080:+	0.36	3.82	0.00015
THCA	rs76259395	chr1:107666942	A/G	NTNG1	chr1:107682629-108026080:+	0.28	3.92	0.000101
THCA	rs77477013	chr1:107506289	C/T	NTNG1	chr1:107682629-108026080:+	0.22	3.85	0.000133
THCA	rs77491500	chr1:107247090	G/A	NTNG1	chr1:107682629-108026080:+	0.43	4.24	2.63e-05
THCA	rs80042192	chr1:107229984	A/C	NTNG1	chr1:107682629-108026080:+	0.43	4.24	2.63e-05
THCA	rs9662586	chr1:107597961	T/C	NTNG1	chr1:107682629-108026080:+	0.21	3.65	0.000293

## Sheet: NTNG2
Cancer type	SNP ID	SNP position (hg19)	Alleles (A/a)	Gene symbol	Gene position (hg19)	Beta	t-stat	p-valule
BRCA	rs13294775	chr9:135052610	A/G	NTNG2	chr9:135037063-135119921:+	-0.11	-3.75	0.000187
BRCA	rs1412076	chr9:135032890	C/T	NTNG2	chr9:135037063-135119921:+	0.09	3.6	0.000338
BRCA	rs4962184	chr9:135390203	C/T	NTNG2	chr9:135037063-135119921:+	-0.08	-3.42	0.000643
BRCA	rs4962185	chr9:135390389	C/T	NTNG2	chr9:135037063-135119921:+	-0.09	-3.61	0.000323
BRCA	rs4962186	chr9:135390551	A/G	NTNG2	chr9:135037063-135119921:+	-0.09	-3.79	0.000158
BRCA	rs571083	chr9:135388118	A/G	NTNG2	chr9:135037063-135119921:+	-0.09	-3.71	0.000219
BRCA	rs577416	chr9:135388799	A/G	NTNG2	chr9:135037063-135119921:+	0.09	3.77	0.000171
BRCA	rs6597553	chr9:135053934	C/A	NTNG2	chr9:135037063-135119921:+	-0.12	-3.87	0.000116
BRCA	rs7039329	chr9:135053756	A/G	NTNG2	chr9:135037063-135119921:+	0.11	3.83	0.000135
BRCA	rs883318	chr9:135042885	C/T	NTNG2	chr9:135037063-135119921:+	0.09	3.55	0.000398
BRCA	rs914424	chr9:135044035	A/G	NTNG2	chr9:135037063-135119921:+	-0.09	-3.44	0.000598
LAML	rs17537644	chr9:134392396	T/C	NTNG2	chr9:135037063-135119921:+	-0.57	-4.23	5.22e-05
LGG	rs306568	chr9:135494669	T/C	NTNG2	chr9:135037063-135119921:+	0.15	3.45	0.000602
THCA	rs11243685	chr9:135118977	G/C	NTNG2	chr9:135037063-135119921:+	0.3	5.92	6.28e-09
THCA	rs11789039	chr9:135118907	C/T	NTNG2	chr9:135037063-135119921:+	0.31	6.12	1.9e-09
THCA	rs142738640	chr9:135118447	CA/C	NTNG2	chr9:135037063-135119921:+	0.28	4.55	6.82e-06
THCA	rs2274852	chr9:135118584	G/T	NTNG2	chr9:135037063-135119921:+	-0.3	-5.87	8.33e-09
THCA	rs2274853	chr9:135114365	C/T	NTNG2	chr9:135037063-135119921:+	0.25	4.2	3.23e-05
THCA	rs2361549	chr9:135115088	C/T	NTNG2	chr9:135037063-135119921:+	0.26	4.19	3.3e-05
THCA	rs56236217	chr9:135114066	C/T	NTNG2	chr9:135037063-135119921:+	0.26	4.21	3.09e-05
THCA	rs876952	chr9:135119472	C/G	NTNG2	chr9:135037063-135119921:+	0.3	5.86	8.82e-09
THCA	rs876953	chr9:135119584	G/A	NTNG2	chr9:135037063-135119921:+	0.28	4.65	4.34e-06
