# Supplementary material for: The pan-cancer landscape of netrin family reveals potential oncogenic biomarkers
Source: Sci Rep. 2020 Mar 23;10:5224. doi: 10.1038/s41598-020-62117-5 (PMC7090012; doi:10.1038/s41598-020-62117-5)
Supplement: Supplementary file 11 — Dataset 11. [file 41598_2020_62117_MOESM11_ESM.xlsx]

## Sheet: Sheet1
The pan-cancer landscape of netrin family reveals potential oncogenic biomarkers
Wenjun Hao1,8, Meng Yu2,8, Jiaxing Lin3, Bitian Liu4, Haotian Xing3, Jieping Yang3, Dan Sun3, Feilong Chen3, Mingzhe Jiang3, Chaozhi Tang3, Xizhe Zhang5,6, Yongkang Zhao6,7 and Yuyan Zhu3,7*
1.Department of Urology, The First Affiliated Hospital of Dalian Medical University, Dalian 116011, China
2.Department of Reproductive Biology and Transgenic Animal, China Medical University, Shenyang 110001, China
3.Department of Urology, The First Affiliated Hospital of China Medical University, Shenyang 110001, China
4.Department of Urology, The Second Affiliated Hospital of China Medical University, Shenyang 110001, China
5.School of Computer Science and Engineering, Northeastern University, Shenyang, Liaoning, China
6.National Institute of Health and Medical Big Data, China Medical University, Shenyang, Liaoning, China
7.Joint Laboratory of Artificial Intelligence and Precision Medicine of China Medical University and Northeastern University, Northeastern University, Shenyang, Liaoning, China
8.These authors contributed equally
* Corresponding author: Yuyan Zhu, e-mail: yyzhu@cmu.edu.cn
The first 5 sensitive standardized coefficients are indicated in bold
drug	NTN1	NTN3	NTN4	NTN5	NTNG1	NTNG2
Bicalutamide	0.331589	0.092392	0	0	0	0
Erlotinib	0.197509	-0.103297	0.382239	0.0983171	0	-0.19663
Vandetanib	0.154566	0	0.111039	0	-0.101378	0
Bortezomib	0.153996	0.106476	0	0	0	0.0764433
lapatinib	0.137402	-0.118616	0.319329	0	-0.0779584	-0.169996
MS-275	0.117021	0.401506	-0.069114	0	0	0
VX-680	0	0.29921	0.144369	0	0	0.290333
Parthenolide	0	0.236354	0	0	0	0.109826
RG-108	0	0.228161	0	0.0990734	0	0.0903663
SB-525334	0	0.225971	0	0	0.0917509	0
Dasatinib	-0.117251	0	0.287299	0	0	0
WH-4-023	0	0	0.223313	0	0	0
AZD0530	0.134104	-0.135697	0.202589	0	-0.116953	0
nelarabine	0	0	0	0.230307	0	0.149186
VAF-347	0	0	0	0.138197	0	0
CMK	0	0	0.138879	0.129384	0	0
importazole	0	0.148406	0.104394	0.114687	0	0.14895
barasertib	0	0.148406	0	0.104394	0	0.14895
thapsigargin	0	0	0	0	0.1379	0
ML162	0	0.186483	0	0	0.137671	0
PRIMA-1-Met	0	0	0	0	0.118175	0
ML210	0	0.126175	0	0	0.106951	0
CUDC-101	0	0	-0.0837058	0	0.105889	0
dabrafenib	-0.0619447	0	0	-0.084638	0	0.157227
Axitinib	0	0.145822	0	0	0	0.146883

## Sheet: Sheet2
Drug	Field
Erlotinib	Protein Tyrosine Kinase	EGFR inhibitor
Vandetanib	Protein Tyrosine Kinase	VEGFR inhibitor
lapatinib	Protein Tyrosine Kinase	EGFR inhibitor & HER2 inhibitor
Axitinib	Protein Tyrosine Kinase	VEGFR inhibitor & c-Kit inhibitor & PDGFR inhibitor
Dasatinib	Angiogenesis	Src inhibitor & Bcr-Abl inhibitor & c-Kit inhibitor
WH-4-023	Angiogenesis	Src inhibitor
AZD0530	Angiogenesis	Src inhibitor
MS-275	Epigenetics	HDAC inhibitor
RG-108	Epigenetics	DNA Methyltransferase inhibitor
CUDC-101	Epigenetics	HDAC inhibitor & EGFR inhibitor & HER2 inhibitor
VAF-347	Metabolism	AhR activator
ML162	Metabolism	Ferroptosis activator
ML210	Metabolism	Ferroptosis activator
VX-680	Cell Cycle	Aurora Kinase inhibitor
barasertib	Cell Cycle	Aurora Kinase inhibitor
PRIMA-1-Met	Apoptosis	p53 activator
dabrafenib	MAPK	Raf inhibitor
Parthenolide	NF-κB	HDAC inhibitor & NF-κB inhibitor & Mdm2 inhibitor & p53 activator
SB-525334	TGF-beta/Smad	TGF-beta/Smad inhibitor
CMK	PI3K/Akt/mTOR	S6 Kinase inhibitor
Bicalutamide	Endocrinology & Hormones	Androgen Receptor antagonist
Bortezomib	Proteases	Proteasome inhibitor
thapsigargin	Transmembrane Transporters	ATPase inhibitor
nelarabine	DNA Damage	DNA/RNA Synthesis inhibitor
importazole	Others	Others inhibitor
