# Supplementary material for: The pan-cancer landscape of netrin family reveals potential oncogenic biomarkers
Source: Sci Rep. 2020 Mar 23;10:5224. doi: 10.1038/s41598-020-62117-5 (PMC7090012; doi:10.1038/s41598-020-62117-5)
Supplement: Supplementary file 12 — Dataset 12. [file 41598_2020_62117_MOESM12_ESM.xlsx]

## Sheet: Title Page
The pan-cancer landscape of netrin family reveals potential oncogenic biomarkers
Wenjun Hao1,8, Meng Yu2,8, Jiaxing Lin3, Bitian Liu4, Haotian Xing3, Jieping Yang3, Dan Sun3, Feilong Chen3, Mingzhe Jiang3, Chaozhi Tang3, Xizhe Zhang5,6, Yongkang Zhao6,7 and Yuyan Zhu3,7*
1.Department of Urology, The First Affiliated Hospital of Dalian Medical University, Dalian 116011, China
2.Department of Reproductive Biology and Transgenic Animal, China Medical University, Shenyang 110001, China
3.Department of Urology, The First Affiliated Hospital of China Medical University, Shenyang 110001, China
4.Department of Urology, The Second Affiliated Hospital of China Medical University, Shenyang 110001, China
5.School of Computer Science and Engineering, Northeastern University, Shenyang, Liaoning, China
6.National Institute of Health and Medical Big Data, China Medical University, Shenyang, Liaoning, China
7.Joint Laboratory of Artificial Intelligence and Precision Medicine of China Medical University and Northeastern University, Northeastern University, Shenyang, Liaoning, China
8.These authors contributed equally
* Corresponding author: Yuyan Zhu, e-mail: yyzhu@cmu.edu.cn

## Sheet: NTN1
alignment#	residue#	AA type	coverage		variability	Score(rvET)
499	181	C	0.00166	2	C.	1.1
470	156	P	0.00331	2	PA	1.6
529	203	C	0.00497	3	C.T	1.65
741	287	C	0.0149	3	CM.	1.9
744	290	H	0.0149	3	HC.	1.9
789	306	C	0.0149	3	CV.	1.9
797	312	G	0.0149	3	GL.	1.9
800	315	C	0.0149	3	CS.	1.9
803	318	C	0.0149	3	CS.	1.9
787	304	C	0.01656	5	VCSA.	2.28
833	338	C	0.01821	3	CMF	2.51
748	294	C	0.01987	4	C.AS	2.75
739	285	C	0.02152	5	CALM.	2.84
935	371	C	0.02318	3	CQ.	3.09
793	308	H	0.02483	4	HSR.	3.16
900	343	C	0.02649	4	CSV.	3.61
289	120	W	0.02815	5	WF.KI	3.87
969	401	C	0.0298	3	CL.	3.88
795	310	T	0.03146	3	TA.	3.91
932	368	C	0.03311	4	CDL.	3.94
930	366	G	0.03477	6	VGTMS.	4.07
743	289	G	0.03642	7	GQLRNS.	4.14
945	380	C	0.03808	3	CL.	4.52
942	377	G	0.03974	3	GK.	4.6
566	226	R	0.04139	5	DR.GN	4.67
907	350	C	0.04305	6	NCAIE.	4.81
897	341	C	0.0447	6	CKSRN.	5.24
478	164	S	0.04636	4	GSKR	5.32
948	383	C	0.04801	4	CGF.	5.37
599	245	T	0.04967	7	CRDTQSV	5.58
291	122	S	0.05132	6	AS.CKF	5.62
929	365	G	0.05298	8	SGYMRK.H	5.63
1308	491	C	0.05464	4	C.TS	6.01
728	274	Y	0.05629	5	PYTF.	6.36
1237	475	Y	0.05795	9	CKRTS.VAY	7.24
940	375	T	0.0596	7	YTSIR.F	7.37
1065	423	C	0.06126	4	CI.F	7.46
815	327	W	0.06291	7	.FWYKHP	7.51
737	283	G	0.06457	5	RGALT	7.54
1068	425	C	0.06623	5	CKR.S	7.6
567	227	P	0.06788	8	PILYGSR.	7.77
1081	437	C	0.06954	5	CA.PS	7.95
1078	434	C	0.07119	6	CKS.HM	8.09
1063	421	G	0.07285	6	G.NADS	8.19
1149	451	C	0.0745	7	CIS.ALT	8.5
909	352	F	0.07616	5	FYLN.	8.78
477	163	K	0.07781	5	QKRHA	8.97
745	291	A	0.07947	5	AGHS.	9
1019	406	C	0.08113	4	C.SR	9.07
1017	404	C	0.08278	5	C.IGL	9.17
1151	453	K	0.08444	9	CV.LGSRKD	9.24
492	177	Y	0.08609	6	YFML.H	9.44
475	161	I	0.08775	5	ILFVM	9.82
1240	478	A	0.0894	9	CF.PSANTR	9.99
485	171	W	0.09106	4	QWFY	10.11
809	324	D	0.09272	6	GAND.Q	10.45
493	178	S	0.09437	8	QTASDN.G	10.47
288	119	C	0.09603	8	QYSWFC.L	10.49
467	155	R	0.09768	10	VAQRMLTGKI	10.59
438	146	Y	0.09934	7	DTFYSHE	11.12
547	212	P	0.10099	10	VSPNHRIYG.	11.28
580	238	L	0.10265	11	VLEARIMSF.Q	11.3
551	216	G	0.1043	11	GDATLQRSWNK	11.39
596	242	V	0.10596	7	GVLMTIS	11.4
602	248	R	0.10762	6	KRQHLM	11.44
489	174	F	0.10927	5	FMWLY	11.51
339	138	L	0.11093	7	PLFAM.I	11.54
422	142	F	0.11258	4	YFML	11.64
476	162	Y	0.11424	9	FLQEDYSHM	11.71
729	275	A	0.11589	7	NTDGAS.	11.74
1167	465	S	0.11755	11	CV.TNIPAQSG	12.01
445	151	F	0.11921	8	FYLMASTP	12.16
490	175	Q	0.12086	13	DQLASKRMFYIVH	12.28
1035	416	C	0.12252	10	CL.VNSGQKT	12.34
1118	448	I	0.12417	8	C.ISFDVL	12.38
503	185	Y	0.12583	6	HYFTW.	12.43
1075	431	G	0.12748	10	GLESA.PMNR	12.69
232	94	C	0.12914	7	SCGTA.I	12.69
806	321	F	0.13079	8	GLFSNPM.	12.77
290	121	Q	0.13245	10	RQIVY.MSLA	12.78
377	140	K	0.13411	10	RLQNHKGSTA	13.49
595	241	W	0.13576	10	IFLYWRQVMT	13.51
434	143	E	0.13742	11	GEQTDVYLHRI	13.55
805	320	P	0.13907	10	VPSDAETQK.	13.75
600	246	D	0.14073	10	KFHQDANTYE	14.21
732	278	D	0.14238	10	GNEDQHKARS	14.28
735	281	V	0.14404	6	LVISTM	14.3
272	110	D	0.1457	12	.DSFTAVRKING	14.38
449	153	S	0.14735	8	PEASGNT.	14.99
736	282	G	0.14901	15	CEASTYIVGRKWQHL	15.02
1321	498	Q	0.15066	11	CSLA.TMVEQR	15.07
435	144	V	0.15232	5	VLIFK	15.13
738	284	R	0.15397	15	PRTAGHSNQMY.KVI	15.28
436	145	T	0.15563	13	STIFVQHRAMENY	15.3
337	136	L	0.15728	7	LMVIF.K	15.36
598	244	A	0.15894	9	QTALVFIMS	15.45
727	273	F	0.1606	8	PFYWSQH.	15.5
581	239	Q	0.16225	14	CHQAMRSKLW.YIV	15.58
605	251	F	0.16391	5	VFLMI	15.66
253	103	H	0.16556	10	PHFL.VNQRY	15.68
1155	457	A	0.16722	12	GWKID.PAVNRE	15.72
473	159	M	0.16887	7	VFAIMLW	15.77
471	157	E	0.17053	13	GYKATSRPDEVHQ	15.77
577	235	S	0.17219	10	GSDTNQAHK.	15.93
294	125	Y	0.17384	11	Q.FWVLMIKCY	16.09
946	381	H	0.1755	9	EHQAFRDN.	16.14
488	173	P	0.17715	12	QPDTVKRIALSE	16.23
333	132	V	0.17881	10	VIMAE.SLTP	16.34
742	288	N	0.18046	7	YHNFQS.	16.4
535	208	T	0.18212	10	S.PGRQTANH	16.55
607	253	R	0.18377	11	GQ.YKRTESLN	16.82
142	78	C	0.18543	7	APCR.YS	16.91
1084	440	G	0.18709	11	GSTMNHK.DLA	17
910	353	N	0.18874	7	SNDKLE.	17.04
482	168	G	0.1904	8	AGHNSKDT	17.09
1072	429	V	0.19205	8	TVIALYF.	17.11
608	254	L	0.19371	14	QYDPSRILVATMHF	17.39
336	135	T	0.19536	12	ATSELKQRV.FI	17.44
903	346	H	0.19702	11	GHRKFATNLY.	17.48
466	154	P	0.19868	13	PRGKSQAYLFIMT	17.69
221	91	C	0.20033	11	ACVSEDG.HIP	17.78
1023	410	G	0.20199	15	IGP.KHSYFNRLVAT	17.89
954	389	R	0.20364	12	GERHIPQMK.LA	17.94
939	374	N	0.2053	8	GNHDY.FS	18.17
794	309	N	0.20695	10	NYFGHDPS.K	18.27
565	225	G	0.20861	14	CAVPHRYQ.DNGES	18.34
553	218	I	0.21026	5	VILM.	18.48
1203	468	E	0.21192	14	GTSKFHND.AQRME	18.53
1275	485	I	0.21358	12	LTYFNS.WVMPI	18.61
258	108	L	0.21523	9	EAIVLM.TK	18.71
552	217	L	0.21689	14	AENHIKVRDQST.L	19
726	272	Y	0.21854	16	CPRKYLSDATMH.FVI	19.13
559	223	L	0.2202	14	.TLESNVAMQIFKR	19.51
730	276	V	0.22185	6	MVIL.F	19.61
121	70	C	0.22351	6	AC.HMS	19.76
818	330	A	0.22517	8	AGSVRTN.	19.8
1069	426	K	0.22682	8	LKRHSQ.D	19.82
491	176	F	0.22848	8	LFYCIH.N	19.83
733	279	L	0.23013	7	FIVLWMA	19.85
574	232	F	0.23179	12	DYIFSP.NALHW	19.91
376	139	G	0.23344	12	SLVEDGNKFRQT	19.98
931	367	V	0.2351	13	LVTIMRNQFKYH.	20.09
472	158	S	0.23675	13	SAGEQKVTRLMIN	20.26
557	221	S	0.23841	13	.TRSIDENKMPLH	20.35
555	220	F	0.24007	9	CLFYI.VAT	20.4
558	222	T	0.24172	10	.LFIVTASMP	20.43
956	390	D	0.24338	12	NPQLDHA.STVE	20.58
480	166	D	0.24503	15	EDKMNGACSTRHYQW	20.69
814	326	P	0.24669	13	.PSTLEIKRAQHM	20.85
498	180	Q	0.24834	9	.DNRESQTV	20.86
740	286	K	0.25	16	RGANQSKDFTLHVMI.	20.87
524	198	E	0.25166	14	KPSAD.QLWIHVNE	20.98
439	147	V	0.25331	5	IVLTF	21.07
601	247	I	0.25497	6	CILVFM	21.13
564	224	D	0.25662	14	NAQIEKRLPTSD.H	21.36
122	71	G	0.25828	5	RG.TS	21.37
834	339	V	0.25993	9	KVIQERNTL	21.51
1351	504	A	0.26159	17	GSHDE.ALFPWYVKRIQ	21.62
293	124	N	0.26325	15	VQISTLNAPEK.FYR	21.66
609	255	H	0.2649	14	RYFAGSQNDHLKEP	21.93
527	201	A	0.26656	9	DVLAISP.M	21.99
687	271	S	0.26821	18	NAFHYDTWCLVI.RQGSM	22.01
951	386	G	0.26987	13	GYK.NHFQLMTRD	22.1
335	134	L	0.27152	6	IVML.P	22.12
334	133	T	0.27318	14	TNASDEKFYH.CQL	22.24
597	243	T	0.27483	13	GHTRKSAEDQVML	22.29
944	379	H	0.27649	14	QHYNLFSRVMED.K	22.45
919	362	R	0.27815	15	TDSE.NYGKLCRFQH	22.63
1288	489	K	0.2798	16	SVDNAGLER.QTFHIK	22.7
554	219	A	0.28146	17	ASRITVEKQHY.MLFPN	22.72
534	207	H	0.28311	12	F.YLQATMVHIK	22.79
904	347	A	0.28477	7	SATPVE.	22.91
259	109	T	0.28642	9	TVNIA.LCQ	23.07
804	319	K	0.28808	13	ALEKHMQRGCV.S	23.32
338	137	S	0.28974	13	NDSAH.KPGVRTQ	23.7
953	388	Y	0.29139	8	YFTLKW.H	23.71
575	233	D	0.29305	15	ANYGFM.PQTSRWED	23.72
731	277	S	0.2947	13	WTVDNSYMHKQRA	23.83
734	280	Q	0.29636	15	PQTEYRINVKSFLMA	23.95
785	302	L	0.29801	18	VALYRKTMPGDENS.QFI	23.96
1700	577	L	0.29967	14	.CTSEQGADRNVIL	23.97
530	204	T	0.30132	14	KDILTSQREV.YNC	24.02
1201	466	V	0.30298	13	VNITPGS.AYFQE	24.05
526	200	E	0.30464	13	SQDKA.GETRHLV	24.11
87	51	C	0.30629	6	C.FVTL	24.12
799	314	E	0.30795	13	NARHQDTGSMEK.	24.19
97	53	P	0.3096	9	PREAG.QVD	24.26
444	150	Q	0.31126	14	RTQFKVMDEHSYLW	24.32
548	213	L	0.31291	16	IVYRQSKCLNPTAGMF	24.4
1160	461	T	0.31457	15	FSDAKG.NETVPMQY	24.42
1079	435	N	0.31623	13	EDNSQR.MATKPG	24.46
938	373	H	0.31788	11	VHDNYRE.AQG	24.56
120	69	T	0.31954	10	VEDHT.MNIS	24.69
568	228	S	0.32119	14	KQGAENDTPVSFH.	24.7
603	249	V	0.32285	7	SVIFLMA	24.74
440	148	S	0.3245	13	RTFIVDKMLSYWN	24.83
604	250	A	0.32616	14	NASHREKLQVDICT	24.93
525	199	Q	0.32781	14	LDSFT.EKQHRGNA	25.04
831	336	N	0.32947	14	NFKHDSTVGEQRYA	25.09
275	112	N	0.33113	18	.DLPEKSGVRQNATFYMH	25.21
817	329	R	0.33278	14	.RQHAPLGKTIVMS	25.31
807	322	H	0.33444	5	FYHL.	25.51
1454	520	V	0.33609	14	GSNK.EVDQHRATI	25.6
820	331	T	0.33775	16	TSIDFNYERGALVQK.	25.68
531	205	D	0.3394	15	KT.SEGPDNQRHAMI	25.89
443	149	L	0.34106	6	VILAFM	25.9
1268	481	G	0.34272	14	GQ.TPESYHNDRAK	26.13
901	344	N	0.34437	12	PNYHRTQSFL.G	26.24
808	323	Y	0.34603	15	YNKRQWHSF.TVELM	26.26
418	141	K	0.34768	13	RPSQEATHKMLVI	26.3
274	111	L	0.34934	18	.HESVITDNRYAFGPKQL	26.36
783	300	D	0.35099	17	.GMTNVIRWHSPQKEDA	26.37
504	186	N	0.35265	13	.GRSNPDKEQFLH	26.66
683	270	D	0.3543	13	SD.TIRFPGKNMH	26.89
1714	585	W	0.35596	18	.GDFTSKWIPQEARYLMV	27.05
790	307	R	0.35762	14	QESFLKRTADIMN.	27.06
507	188	P	0.35927	16	.DPEIVTASYHRLQNF	27.09
1114	444	S	0.36093	13	IH.DAQTRGVNSM	27.17
1490	526	S	0.36258	17	CVY.ERKPQIALTSGMN	27.22
1156	458	P	0.36424	13	TGIEASN.RVMPH	27.28
1071	428	G	0.36589	13	NHRQGSYFK.EAT	27.52
1115	445	R	0.36755	16	AD.PFIRQHLESNKTG	27.63
549	214	S	0.36921	14	YRNSKQTEDAWVPM	27.84
528	202	V	0.37086	14	VINYKLMPTR.HFQ	27.85
1525	540	R	0.37252	18	.CAKFRGLVMQWIDESTN	27.87
796	311	A	0.37417	16	VGQDEKMTARCSH.FY	27.88
810	325	R	0.37583	13	IKVRAQLTHMFS.	28.08
276	113	N	0.37748	16	.VTNLAFPKEGSRDQI	28.28
1684	567	Q	0.37914	19	.CFTHDNQKPLSVMIARGE	28.54
287	118	T	0.38079	15	GTR.FEKIANSPLQD	28.63
1270	483	L	0.38245	17	WFQKYH.RLCSTDIMNE	28.8
1696	573	D	0.38411	17	.PGWTYIAKMEDSNLQR	28.8
1020	407	H	0.38576	12	NHDYE.FPQGSV	28.94
914	357	Y	0.38742	12	YDGAFWLK.EVN	29.03
921	364	S	0.38907	13	PTDNHYLGF.SRI	29.09
899	342	N	0.39073	11	QDNREMKSHT.	29.24
520	195	K	0.39238	17	PL.NDRVAIMQGYFKSE	29.25
128	74	P	0.39404	14	.PNATGEQSRLDVK	29.4
917	360	S	0.3957	13	TP.SRVNQKGHAF	29.74
832	337	E	0.39735	13	DVPNEQMATSIKH	29.98
1668	556	L	0.39901	15	.ACGTSNVFWPILQM	30.25
1028	411	A	0.40066	16	DSTAIVMG.KQHFERL	30.27
300	126	L	0.40232	18	G.DLMYWQSKATEFNPVR	30.52
606	252	S	0.40397	16	IALHFQYETKVSRMDN	30.55
474	160	A	0.40563	14	DAIRQKCTVYLSFG	30.56
301	127	Q	0.40728	17	K.EDNSHTRLGQYFMAP	31.07
1682	565	P	0.40894	16	.SDREPNMAQLTVIGK	31.09
518	193	I	0.4106	19	SQGDRATPIEWHN.YFLMV	31.34
1309	492	K	0.41225	15	CNHD.SAQMTEFYKR	31.39
1455	521	Y	0.41391	16	PVLRFTQGKDN.YAEW	31.42
119	68	S	0.41556	14	EPTSNLFQ.WADGH	31.62
1326	503	K	0.41722	16	.DPVGKTSNQRAYFEH	31.7
508	189	H	0.41887	16	.TQAKPEHDRGNSYFM	31.72
913	356	L	0.42053	13	CLMEIVDKYRAT.	31.72
533	206	S	0.42219	16	I.SQEKRVPADGYFNL	31.78
446	152	C	0.42384	16	VSGFLQYENACKRTHI	31.9
801	316	D	0.4255	11	EGNDQRAHST.	31.94
1681	564	S	0.42715	18	.CGSITKQAENPRDVLFH	32.07
292	123	E	0.42881	17	VEANRHPQILGSKM.DC	32.12
1163	464	S	0.43046	17	S.NIDVAGTFKQHYRME	32.35
103	59	A	0.43212	13	IQVFYSALT.MED	32.42
550	215	G	0.43377	13	DNRQHCLGKEPAS	32.44
1712	583	D	0.43543	17	.ESRDVPGNTAMLIKQH	32.44
101	57	N	0.43709	12	HAEDFYKN.QTS	32.48
545	210	M	0.43874	17	SKRFVTHE.IPALNMQG	32.6
1085	441	Y	0.4404	11	YFHTMLPI.WN	32.73
569	229	A	0.44205	18	GL.YIKMSRHNFQAEVDT	32.81
1162	463	A	0.44371	18	YDSTEIFN.GPAKVQRLM	32.83
959	393	K	0.44536	15	VAMRKLIEYPQHTS.	32.84
1031	413	G	0.44702	15	V.TSGRNADELKQHY	32.86
826	335	A	0.44868	17	PAGLKTSDNMQEHIR.V	32.95
1086	442	Q	0.45033	16	FYWITHA.MVENRKLQ	32.96
102	58	A	0.45199	9	LVITA.FMK	32.97
1702	578	V	0.45364	17	.TDESIALRHKQMNVYF	33.09
918	361	G	0.4553	17	SNDEALFY.GKQHTWRM	33.27
1087	443	Q	0.45695	15	GDNKLSTE.QRYHAC	33.4
754	299	D	0.45861	18	.NERFVATIQMLYDHSKP	33.41
1062	420	T	0.46026	17	TVGI.SNALFPQDKHEY	33.42
143	79	V	0.46192	14	AVILKERY.SFTPM	33.5
187	86	E	0.46358	15	.SNATLVPHKGDMER	33.64
1705	581	W	0.46523	14	.FYSWCGLMPHKIN	33.76
952	387	Y	0.46689	9	YLFSHA.WN	33.78
255	105	P	0.46854	10	LPAVIT.NSG	33.79
1043	417	N	0.4702	17	DNGEAT.CKVMQSFRHI	33.98
576	234	N	0.47185	19	NAKLFIVYQRHWST.PEDG	33.98
1683	566	D	0.47351	18	.QLRAPGKSTDYHVMENC	33.98
254	104	P	0.47517	17	LP.RQNVTEKMGHDASF	34.07
484	170	T	0.47682	14	RTSGDNEKAPVYHI	34.13
481	167	Y	0.47848	15	G.DTNRFKYHSAEPL	34.23
115	64	V	0.48013	13	VLDTSPF.WINMA	34.24
1419	508	G	0.48179	18	CNG.QRASEKVTMDLFYH	34.25
331	130	H	0.48344	15	RAHENQLPTGSD.KV	34.46
1269	482	K	0.4851	15	FHTY.SDPAVLWKRN	34.54
746	292	A	0.48675	14	SADRNMKELQTGVF	34.92
1670	558	L	0.48841	17	.TCHSDLIVAGRFNEMP	34.96
1034	415	T	0.49007	17	NTVLECAMS.HGDQIYP	34.97
593	240	D	0.49172	12	DWEKQNGSTAHR	34.98
141	77	Y	0.49338	10	GYRFSI.WVL	35.09
1064	422	Q	0.49503	15	SAQMIRYDHK.ENVT	35.16
968	400	A	0.49669	13	SAPVITYFLGRH.	35.18
1732	603	K	0.49834	17	.EPDLVIYSNFMQRKTG	35.33
517	192	P	0.5	17	ADNIPTERQKSLHV.GM	35.35
1695	572	A	0.50166	19	.YWSEATGDNMRQHPILVF	35.38
139	75	A	0.50331	13	KALQ.ESTDHNIV	35.44
144	80	V	0.50497	15	TPQILV.RYHFKSAD	35.58
546	211	R	0.50662	19	STPALERWKQDIFGVNHY.	35.72
1526	541	D	0.50828	17	.FDNEHSPMLIVGQRKA	35.89
1082	438	A	0.50993	14	KAQVIYLRM.NSED	35.9
1538	544	C	0.51159	21	.CGDEQKSYRFTVAMLWHIPN	35.95
1311	494	D	0.51325	17	EPTHYG.ILRDNQSAMV	35.95
1503	536	W	0.5149	19	DGSATP.HLWCVRMIQEYF	36.06
1238	476	C	0.51656	14	DSNGQE.AVYKRPC	36.1
1671	559	G	0.51821	15	.ALKRTPFQGYEDNS	36.23
1716	587	R	0.51987	16	.CGSVIQRPDKLTYAF	36.25
902	345	L	0.52152	14	GENSDLKMIQRAH.	36.25
906	349	R	0.52318	16	GSREKVTAMDQYNHL.	36.28
502	184	M	0.52483	17	YF.DLVTQASEINKRHM	36.33
1704	580	Q	0.52649	19	.YHNFGEWLQSADPIKRMT	36.58
99	55	F	0.52815	13	PAVISMFT.LNYQ	36.64
286	117	L	0.5298	18	AGVSPYQNEDR.KMTLIW	36.66
1116	446	S	0.53146	19	RE.DGNYQKLSMVFAPHTI	36.74
332	131	N	0.53311	18	NREGKQPAHSVMFD.TYW	36.92
1539	545	K	0.53477	19	.HASTPKEGIDLCMNWVQR	37.21
118	67	S	0.53642	11	SQNTCL.FDIH	37.25
1420	509	D	0.53808	18	KVRPL.HQANSDYFIGTE	37.25
1325	502	L	0.53974	17	T.SNPYGDVEKHARLIQ	37.29
1303	490	Y	0.54139	17	DSTQHRGN.AEYWKVFL	37.33
1493	529	R	0.54305	19	CVA.PMIRTLYQSEDHFGK	37.39
784	301	S	0.5447	18	.SDPLNGHRQYKETIAVM	37.44
1685	568	S	0.54636	17	.RDSNPTAVMLQEGHFK	37.56
920	363	K	0.54801	15	TRFHY.QVKSCALIM	37.57
943	378	R	0.54967	17	RIKDHATQVNYPML.FS	37.73
1554	549	I	0.55132	18	.SCAPNGEQRVTILDKYF	37.96
752	297	D	0.55298	14	TVSGPQDEHRNA.K	38.05
1686	569	G	0.55464	16	.NSEKQGARDHIVTLY	38.18
1241	479	S	0.55629	18	ASVNDKRCI.LTYMQFGE	38.27
497	179	T	0.55795	19	.RDKTWFLINAPEVYQHSG	38.28
479	165	M	0.5596	18	SNIEKFVTDQYPAWHLMR	38.44
958	392	G	0.56126	17	LAGSNTKRDQEYVIMH.	38.55
516	191	A	0.56291	19	APNDVE.RHTSKLQMGYFI	38.58
257	107	F	0.56457	12	YFNH.SAQEKLR	38.59
1317	495	Y	0.56623	16	RLQSNHFDT.GPKEYA	38.62
1523	538	R	0.56788	16	.CPLSGHNTQARVKYE	38.72
109	61	G	0.56954	15	A.DGRSKNVYQTHLM	38.8
957	391	M	0.57119	18	PAVLMSWI.RYHEFQKTN	38.81
1117	447	P	0.57285	18	NGKEYT.DHSFLVRQAPI	38.81
1161	462	A	0.5745	19	HRIVTSK.GMQNLPFEYAD	38.84
963	397	H	0.57616	16	.HNADSIPERYQGVFL	38.88
1021	408	P	0.57781	17	NASEKTP.LIHVFYDRQ	39.03
222	92	H	0.57947	15	D.TEFYKHGNCASRQ	39.22
194	89	R	0.58113	18	.IVLPSAMRNDQGKEFYT	39.23
1713	584	T	0.58278	20	.NSCEIQDRFLYVHKATGMP	39.29
1653	554	K	0.58444	18	.CGAVYSDLTIEFPNWRK	39.4
522	197	N	0.58609	17	PEYNK.FSGDHARQTIV	39.47
908	351	R	0.58775	15	KHVYTELNRF.IQMS	39.54
579	237	V	0.5894	18	LVEASQYFHKRTDGNMI.	39.7
1029	412	A	0.59106	15	PE.RKVTASLIQDNH	39.87
1505	537	I	0.59272	19	.CNLYIKTFHWSVPDQERA	39.91
111	62	K	0.59437	15	RPNEDSTHKL.VAGI	39.94
1287	488	K	0.59603	16	SGTFALYNQVK.REDH	40.01
1285	486	N	0.59768	16	.ESRQPAKDGTVINMH	40.24
285	116	N	0.59934	17	DEYVILKRP.GANHQTS	40.3
966	398	R	0.60099	19	GVSRIMPALQHE.TYDNFK	40.39
1202	467	E	0.60265	18	ETIDQHCGNRLPVM.YSA	40.47
950	385	E	0.6043	20	DPANSQLETHFKRYGMW.VI	40.54
100	56	V	0.60596	16	DQLMEPRG.TFWVIHK	40.67
788	305	D	0.60762	15	DAILFEVMNQTRKS.	40.82
1152	454	I	0.60927	16	DVNSKGAH.YFRILEQ	40.94
1061	419	T	0.61093	19	LKVIMP.AGETQHDNSFWR	41.08
1719	590	R	0.61258	19	.ECQITVKLMPSDRFGNAW	41.18
786	303	V	0.61424	18	CAQRVNKTIWHPYELMS.	41.28
233	95	N	0.61589	15	IERSNYHDKT.PQMF	41.45
1721	592	F	0.61755	19	.SCNDRFIMVPQTAGLEKY	41.58
573	231	D	0.61921	20	RSNDHCAG.FEWPMKTVYQI	41.61
960	394	P	0.62086	18	PSNDEGRKATFQWLYHV.	41.72
961	395	I	0.62252	18	.RPTILVFKMDHAWQENS	41.74
117	66	V	0.62417	10	VPLSITA.NR	41.76
578	236	P	0.62583	19	TDPQNMLAKSREGHIYV.F	41.83
936	372	R	0.62748	16	QMEYTARKIGLNDSV.	41.84
48	41	C	0.62914	18	CYFLISVAT.GKMQRPEN	41.93
1077	433	T	0.63079	15	NLAQRKPHWDY.SFT	41.96
1703	579	I	0.63245	17	.GRQTHLIPADSVENFM	41.98
252	102	A	0.63411	16	TASQRM.GYNPHVKDE	42.07
1541	547	P	0.63576	15	.QNPSTEKDGALFVM	42.12
515	190	R	0.63742	18	LAEKSPTVIN.MGDYQHR	42.18
46	39	D	0.63907	19	GDVFEYS.TARKIQHLPNM	42.36
235	97	S	0.64073	16	NASRTKG.QEDHYFPC	42.46
1070	427	D	0.64238	18	YADREPVKNQLMTSG.IH	42.62
501	183	K	0.64404	17	DESITARKNGQH.PLVM	42.64
934	370	N	0.6457	12	KSNDAGTQERH.	42.66
519	194	T	0.64735	19	QPSDRNEKTGLIHYVA.WF	42.77
947	382	Y	0.64901	16	ETSLINRVKFYQMH.A	42.77
1674	562	E	0.65066	18	.AFVIEDLPYRTWHNSGK	42.98
941	376	A	0.65232	15	TAEQMSKNVIRYD.H	43.15
1033	414	K	0.65397	19	GSPLIFTDE.VAMRNQYKH	43.19
747	293	R	0.65563	19	SRAHDVNQKYGWFEMTLI.	43.25
1142	449	A	0.65728	16	TEQSRK.HVIDPLMNA	43.26
1080	436	R	0.65894	16	RMEHQSYKLTVAI.DF	43.43
220	90	S	0.6606	19	VSGAEDP.KQRYHTFNMLI	43.55
45	38	P	0.66225	18	TADGLNV.HWCRSEIQPM	43.56
933	369	L	0.66391	14	DTENQKIGHLVRM.	43.57
277	114	P	0.66556	17	.ANLITGRKSMVDEQPY	43.71
50	42	S	0.66722	19	CYILFS.ATGVNRQEKMDH	43.86
1720	591	K	0.66887	19	.CDNSVIKFYAGRHPTQEL	43.95
86	50	R	0.67053	17	QT.AVYSIMHFRGEDKL	44.03
896	340	A	0.67219	13	RAIPKEVQSTM.L	44.18
1733	604	A	0.67384	19	.MTSVPICAGLRKDENFWQ	44.21
1239	477	K	0.6755	16	REQHGIP.TKSAMLVD	44.25
1715	586	A	0.67715	19	.LSATPFDGVNKHYREQWI	44.26
1044	418	Q	0.67881	15	RPEKQ.NSFTAGDVH	44.37
1154	456	V	0.68046	17	KFDSLNQRG.IMHAVEP	44.48
521	196	Q	0.68212	19	RTEA.LDNVGQKSHIYMFP	44.51
1501	534	S	0.68377	20	PESDYAFKLIMHGNTWQV.R	44.77
1524	539	S	0.68543	19	.TEDRQNPLGVASKYHIFM	44.86
749	295	V	0.68709	18	NS.DAEVQRGILKTFPYM	45.25
1143	450	P	0.68874	15	SPEAGQ.KRLHTVND	45.34
1323	500	H	0.6904	17	Q.PKNVRLTESADIYFH	45.37
1423	512	K	0.69205	19	GDEFNIQK.YHSTAVMLPR	45.63
1730	601	C	0.69371	19	.LVITKFQHDYAPCEGSNM	45.67
915	358	K	0.69536	16	VAP.KDRLSETYQNHI	45.7
1267	480	K	0.69702	18	EVNFDH.PALSTQYKMIR	45.75
1667	555	Y	0.69868	18	.TIQLNSRWYFDPEHVAK	45.75
542	209	D	0.70033	17	MTSRNGD.QAPHKEFYL	45.76
246	99	P	0.70199	18	PRVLS.TFQDNWEAICMK	45.78
192	87	R	0.70364	20	.DSGRQFWYEIKPHTMANLV	45.87
1286	487	M	0.7053	17	.DSRGNTKLAHEVMQPF	46.14
1008	403	A	0.70695	15	PSE.DMKRVALNHQT	46.2
1310	493	K	0.70861	19	IGALFVPY.QTSEMKHDRN	46.24
505	187	R	0.71026	19	.IMLSARHQWDNFGEKVPT	46.39
1495	531	G	0.71192	19	DENYTQPC.KMHILSAVGR	46.42
245	98	D	0.71358	19	IV.QNHSKDRCPLYTGEAF	46.42
284	115	H	0.71523	20	KDIENQSHTF.RYWPLVMAG	46.56
822	333	R	0.71689	18	GDTVPALRKQNSHEYW.M	46.94
970	402	K	0.71854	17	KITR.PANLQVEYMHSF	47.13
962	396	T	0.7202	17	.NSDTAGPRYQIEHKMF	47.13
486	172	V	0.72185	15	AEVDTQRKHGSLMFI	47.18
1076	432	I	0.72351	19	FDRLPTEVAQSKHN.MYWI	47.2
816	328	Q	0.72517	14	.ARHKMLQESTCGD	47.25
821	332	A	0.72682	20	KDSQHTEGRAYPMW.VLNIF	47.26
1731	602	K	0.72848	20	.TQRCWEPHSDALKVMIYFN	47.32
104	60	F	0.73013	17	YSTQFKRI.LVENAHDP	47.42
51	43	D	0.73179	19	RSQDGNEA.YLFWPCHTVI	47.44
96	52	I	0.73344	16	YF.QHSTVLNKWADIM	47.47
1159	460	T	0.7351	17	GNSR.DQKEVLFTPAYI	47.54
1725	596	E	0.73675	18	.YRVDNTGSFQIEHPALK	47.61
967	399	K	0.73841	16	GNSDEKQLMYHATRF.	47.92
44	37	Q	0.74007	19	QPHNSVGI.DLFERTKMAY	47.99
43	36	A	0.74172	18	.SMLQGKDEAVFTPNRHW	48.13
1067	424	P	0.74338	18	QEPNSDKFLIVRHYMA.T	48.15
1018	405	D	0.74503	17	SEND.GPRATKLVMQYH	48.18
1422	511	W	0.74669	19	AEPKGT.VRQDLSYHNIWM	48.61
98	54	D	0.74834	17	LSEDCPR.QKANTMVIG	48.82
247	100	K	0.75	19	NR.AIMPYHDGTKELSQFV	48.85
916	359	L	0.75166	16	DF.MSAKNTIRLQHEV	48.97
1673	561	A	0.75331	20	.TGNYRDMIKVCLPAQHESF	49.01
1717	588	R	0.75497	18	.VLQDHNPIRSAMGTKEF	49.1
40	33	G	0.75662	20	.TNVIACPSLFWRYDGQKHE	49.32
1150	452	I	0.75828	16	VDHKNSGLQTR.APEI	49.32
47	40	P	0.75993	18	QTYRGLIVEAS.PDCHNK	49.41
1452	518	I	0.76159	20	F.VTAILWQSMDYHNRGEKP	49.45
949	384	K	0.76325	14	ASKITMERLQGV.N	49.46
1500	533	Q	0.7649	19	SNFLPVAKTIGQY.HERDM	49.56
751	296	R	0.76656	18	KD.NITSGFVLAREQMPH	49.61
256	106	A	0.76821	18	RQGTSAEW.KNVDLHYIF	49.66
1675	563	D	0.76987	21	.STGEPKALCFRMQVNWIHYD	49.69
1492	528	I	0.77152	16	EATSQDIVKLF.GRHN	49.79
30	23	R	0.77318	19	.AGDLTEIQRSPKCVFMNW	49.92
500	182	R	0.77483	19	LEPSGRDNATKMQ.YIWVF	49.96
798	313	P	0.77649	16	KPDRLTEAVSHYMIG.	50.03
29	22	V	0.77815	21	.ALIVKFTPRESHQDWMGYCN	50.09
85	49	R	0.7798	18	RA.LEQYSKHTVGNDFPI	50.09
1319	496	A	0.78146	20	SAPKERLQT.WNHIGDVMFY	50.13
1322	499	I	0.78311	18	NDSLETFA.HRQKMYVIG	50.32
32	25	G	0.78477	19	.GISTYLRPENQCMVDHAK	50.46
126	73	P	0.78642	17	P.SDAGTVERKQLMNYH	50.93
570	230	H	0.78808	19	TA.NLFYSGQDHERKPVMI	50.95
911	354	M	0.78974	19	EAIKVQPDSLMYRH.FNTW	51.09
1722	593	Q	0.79139	19	.ANSQDEGYHMCFIVTKPR	51.11
1073	430	T	0.79305	17	AMRSTYQGKEVDHN.IL	51.16
1083	439	K	0.7947	19	PDNSKVMQIAEGRHY.LFT	51.23
140	76	R	0.79636	19	NSDRVKE.HLATGPQMIYW	51.34
1729	600	K	0.79801	19	.NWLRKGEVSDMIAQPTFH	51.67
31	24	G	0.79967	20	.LQCAINFTYHRSMGPDWEV	51.79
251	101	K	0.80132	19	YENKLQR.MFSDHIAVGTW	52.08
234	96	A	0.80298	19	TGEDNFSP.AVCMQKRYWL	52.24
825	334	E	0.80464	15	TEQRHYPNKASDV.L	52.51
1491	527	R	0.80629	18	CDTKNRALI.SEVGPMQH	52.54
912	355	E	0.80795	17	STQDGKNHAVIFR.MEY	52.62
1706	582	R	0.8096	19	.ENHQYFLGRTAVMKIWDS	52.71
483	169	R	0.81126	17	KQLFSHVDRNEAGITCY	52.76
193	88	L	0.81291	16	.NKHQRGDTSPVEALM	53.01
1718	589	L	0.81457	19	.APQRLYKIVTHNSFDEMG	53.18
802	317	R	0.81623	19	AERHQMLKYTSNDGIFV.C	53.28
1324	501	I	0.81788	18	I.EHLVSTGRAFMQKDYN	53.35
1669	557	L	0.81954	20	.GTRLIVNQKSEAYDFPHMC	53.43
1499	532	D	0.82119	19	GASYTIVRF.CLHDNEMKP	53.5
11	4	A	0.82285	20	.NDMHLKGSRETWVCQAFIP	53.65
1236	474	S	0.8245	19	QRKIYTDNEHP.SGAMFLV	53.71
1540	546	C	0.82616	21	.PVLRWEATHDYKGSCIMQFN	53.92
1537	543	A	0.82781	17	.LSDAEYHFKTIMVRCQ	54.03
1727	598	K	0.82947	19	.DYVALEICFRKSTQPMGN	54.1
1022	409	V	0.83113	20	NATIVMLQFHDRS.GYEWPK	54.14
1728	599	G	0.83278	20	.DSNKATQWGHPMVLEIYFR	54.56
753	298	R	0.83444	19	GDNKQRLIH.STEPMVAYF	54.73
228	93	L	0.83609	19	Y.TASPFKELIVHQMRWND	54.83
54	46	G	0.83775	19	ISLYC.NGAFDPQEVRHTK	54.97
1650	551	P	0.8394	21	.LASVQHNKMDIPRGFETCWY	55.03
1536	542	I	0.84106	21	.RVPTAELQNIYGFMKSDWHC	55.05
1502	535	L	0.84272	20	PQSGIVALFYKRNTMDHE.W	55.11
1724	595	R	0.84437	21	.TPWLFIRVDEAGKNSQYCHM	55.15
28	21	A	0.84603	17	.TYIRQLFVPSHAKGDC	55.19
1320	497	V	0.84768	19	MATFVLIP.NQSHERYDKG	55.4
1652	553	K	0.84934	19	.THVAEISRFDGMQNPLKY	55.56
1726	597	K	0.85099	21	.ADGVRLKWFHYSETMNCIPQ	55.67
1494	530	R	0.85265	19	ESLIRVTDKG.QAPNFMHY	55.67
1672	560	N	0.8543	19	.SPTDERKIQYVLACMGHN	55.9
1453	519	S	0.85596	17	G.TQRKEILVDSAFNPY	56.05
1548	548	K	0.85762	19	.CVDIQTSKLYFENAHRPG	56.63
125	72	R	0.85927	17	Y.SGVPRQAEKFNTDHI	57.28
905	348	R	0.86093	16	SLNRKDTEVMIHAYQ.	57.33
84	48	P	0.86258	20	GN.YFVAQRHETKWDSLPCI	57.49
1723	594	Q	0.86424	18	.NPSFGARHETLQVIMDK	57.59
1555	550	K	0.86589	19	.SDNTKQPMAGRLVEIHFC	58.76
1153	455	P	0.86755	18	KVTIEGLSF.MDPAQRYW	59.28
12	5	V	0.86921	21	.ATVWLMERIDGCPYHFSKNQ	59.51
1204	469	P	0.87086	18	KQLRVNPG.ESTAHDFIY	60.29
1456	522	K	0.87252	20	RCAQTSYKIPV.DMNLEGHW	60.7
114	63	D	0.87417	19	AGYSKRVQL.IFHNMTPED	61.39
52	44	E	0.87583	18	KEQDVL.NGRPSAYTFIH	61.88
41	34	Q	0.87748	21	.CGRVEHTLPFIAMWDNQSKY	61.91
1157	459	P	0.87914	19	NIVR.LQHSTAEYFKDGMP	63.09
1418	507	A	0.88079	18	QRSKEDTMNV.APIHLGY	65.05
53	45	N	0.88245	18	GAPE.VLTSNIDFQRYHM	65.16
42	35	A	0.88411	20	.GLRTVSFQAIYMNEHPDWK	65.51
1651	552	L	0.88576	20	.DERKWAVGPQHNISCTYLF	65.8
55	47	H	0.88742	20	.QTPVEDKFLSANGRIYMHC	67.76
116	65	R	0.88907	20	GLHPTSREK.IWVYAMFQDN	69.38
14	7	E	0.89073	20	.GTPSADKQLMWRCYIVFHE	69.93
19	12	L	0.89238	21	.AISVLETRPKFGNDQCMWYH	70.35
13	6	W	0.89404	20	.TRVMAIQKLPDSHNEGCFW	71.33
18	11	A	0.8957	20	.SPMRFANQLVGYICWHTKE	73.56
15	8	A	0.89735	21	.CLSITKGPVREQAFNDMHYW	74.8
25	18	L	0.89901	20	.PNGESLRCIYWFAVKQDHT	75.36
16	9	L	0.90066	20	.MVNFHSRTAYGCILEQWKP	77.13
17	10	A	0.90232	21	.PSGKHNWLAQFEDCMVYRTI	78.21
20	13	A	0.90397	20	.ATFILMSPWYQVDGNKHRC	79
26	19	V	0.90563	21	.TVASGKHLCFMIWRPDEQNY	79.85
24	17	C	0.90728	21	.STRPGVDEMLFAYIWCQKHN	80.81
23	16	A	0.90894	20	.PSAWRHLFGMIQYVDTECK	81.63
22	15	V	0.9106	21	.NLYFRMPWATVKSIGCHEQD	83.03
21	14	A	0.91225	21	.LDEQSVMITRGFCAPWHYKN	83.13
8	1	M	1	17	.STKEAQRHMLIVWPFY	85.82
9	2	M	1	18	.IAFEGQRPTVSLNYMHK	85.82
10	3	R	1	20	.VFNGMRLIKSDWQYTPCAE	85.82
27	20	G	1	21	.TVMQIAWHKLCYSGFPNRDE	85.82
33	26	P	1	17	.RALQSVITMDNGFPEW	85.82
34	27	G	1	19	.PNKWLVGTQAEDSMYFHC	85.82
35	28	L	1	17	.IGSDVTLKQPRFNAEH	85.82
36	29	S	1	20	.IMLFSTYDGHQPREAVNCK	85.82
37	30	M	1	14	.SQELFIRAGMVYT	85.82
38	31	F	1	17	.TAQSKILDPVYCFGRH	85.82
39	32	A	1	17	.SFILTDPCAVYEGQMW	85.82
150	81	S	1	15	L.YENKTQAPFMVRS	85.82
151	82	E	1	12	L.PVYHNQGRED	85.82
152	83	R	1	12	D.SNGEQKRPTH	85.82
185	84	G	1	7	.EPRNAG	85.82
186	85	E	1	13	.NLIVRMTSAGQE	85.82
322	128	F	1	5	.SGAF	85.82
330	129	P	1	8	.PDRNTGS	85.82
611	256	T	1	11	.IGQRMTLNSY	85.82
615	257	F	1	7	.PVQLFS	85.82
616	258	G	1	6	.TSQEG	85.82
617	259	D	1	6	.TAPDG	85.82
618	260	E	1	7	.LVIAED	85.82
619	261	N	1	8	.SALQNER	85.82
620	262	E	1	7	.RNQSEG	85.82
621	263	D	1	7	.IFQEDS	85.82
622	264	D	1	6	.ADQNG	85.82
678	265	S	1	10	G.KTVHSAYD	85.82
679	266	E	1	7	S.TKEGA	85.82
680	267	L	1	10	F.EAGQVLIS	85.82
681	268	A	1	9	G.LSTEAIQ	85.82
682	269	R	1	10	F.RYTSVLGA	85.82
1212	470	E	1	4	.ARE	85.82
1213	471	D	1	5	.SGTD	85.82
1214	472	C	1	7	.SAVPCR	85.82
1215	473	D	1	5	.PSTD	85.82
1273	484	K	1	15	.AILVYGNSDTHRQK	85.82
1361	505	D	1	8	.RAVGQDE	85.82
1362	506	K	1	7	.PASHKT	85.82
1421	510	W	1	16	.EWAGKISDYTRLFVM	85.82
1424	513	F	1	9	.VDTFWIYL	85.82
1425	514	T	1	15	.GQDYSNTAIVERHM	85.82
1449	515	V	1	15	.LQHKRTSAMIPFYV	85.82
1450	516	N	1	13	.AQDTHFSGENKR	85.82
1451	517	I	1	7	.QVSKLI	85.82
1463	523	Q	1	7	.RHKQDT	85.82
1464	524	G	1	5	.GTSA	85.82
1489	525	T	1	8	.GVSNDTE	85.82
1693	570	I	1	15	.RKSTFHEADQLNMI	85.82
1694	571	V	1	12	.LVIGRATESPM	85.82
1697	574	K	1	17	.ITEDHRQYKALVPMNS	85.82
1698	575	S	1	17	.SRQCVGTPAYIDENHK	85.82
1699	576	S	1	9	.WHLYFSRT	85.82

## Sheet: NTN3
alignment#	residue#	AA type	coverage		variability	Score(rvET)
723	274	C	0.00862	1	C	1
731	280	T	0.00862	1	T	1
736	285	C	0.00862	1	C	1
739	288	C	0.00862	1	C	1
765	308	C	0.00862	1	C	1
455	177	C	0.01034	2	C.	1.18
425	154	C	0.01207	3	CD.	1.24
656	260	H	0.01379	3	HQL	1.39
733	282	G	0.01552	2	GR	1.48
653	257	C	0.01724	2	CW	1.84
834	313	C	0.01897	3	CS.	1.9
869	341	C	0.02241	3	CQ.	2.15
903	371	C	0.02241	3	CLG	2.15
655	259	G	0.02414	4	GLQN	2.86
729	278	H	0.02586	5	HTSGR	2.88
651	255	C	0.02759	3	ACM	2.93
393	129	P	0.02931	3	PSA	3.02
841	320	C	0.03103	4	CAIE	3.05
866	338	C	0.03276	4	CDL.	3.11
660	264	C	0.03448	3	VCA	3.21
864	336	G	0.03621	5	GTMS.	3.24
879	350	C	0.03793	3	CL.	3.45
876	347	G	0.03966	3	GK.	3.52
1022	407	C	0.04138	4	C.SV	3.52
831	311	C	0.0431	5	CKSR.	3.55
882	353	C	0.04483	4	CGF.	3.57
1006	393	C	0.04655	3	C.F	3.66
863	335	G	0.04828	8	GYMQSKH.	3.75
1009	395	C	0.05	5	CK.SM	4.02
748	297	W	0.05172	4	WFYP	4.64
1019	404	C	0.05345	5	CSK.M	4.94
949	374	C	0.05517	5	C.ILT	5.23
725	276	C	0.0569	6	CPDAQL	5.58
657	261	A	0.05862	3	ASG	5.61
951	376	C	0.06034	4	C.SR	5.69
290	93	W	0.06207	5	FW.KI	6.13
1004	391	G	0.06379	7	GDN.ASE	6.26
1102	421	C	0.06552	5	CS.LT	6.34
497	199	S	0.06724	8	RP.QTGNS	6.37
401	137	S	0.06897	5	SVRKA	6.74
524	218	T	0.07069	8	RSDKT.QV	7.23
843	322	F	0.07241	5	YFLNV	7.23
874	345	T	0.07414	6	TSIR.F	7.33
640	244	Y	0.07586	5	YFT.A	7.46
292	95	S	0.07759	7	STA.CKF	7.92
649	253	G	0.07931	5	SGATL	8.19
967	386	C	0.08103	10	CLVSG.KARY	8.29
418	150	F	0.08276	6	FMYLH.	8.9
1175	445	C	0.08448	8	C.VTGLAR	9.51
498	200	P	0.08621	8	LIFP.SRG	9.62
386	124	F	0.08793	8	FYL.MSAP	9.88
1076	418	V	0.08966	8	CI.VFLDR	10.03
429	158	Y	0.09138	4	YFWT	10.15
745	294	D	0.0931	5	GANDQ	10.46
1016	401	G	0.09483	10	GESLA.PNDV	10.52
1104	423	K	0.09655	9	C.EGSDKRI	10.59
419	151	S	0.09828	6	ATSDV.	10.6
412	144	W	0.1	3	FWY	10.71
400	136	K	0.10172	5	RKYHA	11.28
398	134	L	0.10345	5	ILFVM	11.85
650	254	R	0.10517	12	RATSNGHQMKIV	12.32
1220	460	C	0.1069	9	CSDTPA.LN	12.35
289	92	C	0.10862	9	YSTWF.CQL	12.76
512	211	L	0.11034	13	LFQTNAVRIM.YP	12.88
742	291	F	0.11207	7	LMFGNPS	12.88
416	148	G	0.11379	14	QLASKRMFYIVH.G	12.97
330	111	L	0.11552	6	LF.MIR	13.19
392	128	P	0.11724	13	VPALQRMTKEIGH	13.22
255	76	H	0.11897	8	H.VNQLYF	13.31
399	135	L	0.12069	9	ELQSDFYMH	13.36
517	214	W	0.12241	10	FHLRQVM.WT	13.46
527	221	R	0.12414	7	RQK.LMW	13.6
374	115	F	0.12586	6	QYLFM.	13.61
379	119	F	0.12759	10	ETFYQHDS.N	13.65
415	147	L	0.12931	7	YFWMLI.	13.67
232	67	C	0.13103	9	STNHCD.IA	13.81
472	185	P	0.13276	14	.PSHRQIYVGTAFL	13.89
1041	410	G	0.13448	10	GSMTNH.KDA	14.28
376	117	L	0.13621	8	VILMF.PK	14.33
741	290	P	0.13793	9	PDAESVTKQ	14.39
1203	457	K	0.13966	12	CRTS.PVAKGEN	14.65
639	243	S	0.14138	7	FYWHQST	14.83
1153	438	P	0.1431	13	C.INPSTDHYKRQ	15.1
1135	430	T	0.14483	13	GID.LKAPHTYFQ	15.13
1384	491	F	0.14655	11	CKM.ANTYWFL	15.49
377	118	V	0.14828	14	ITFSQVHR.EAMNY	15.49
647	251	V	0.15	5	LVISM	15.55
641	245	A	0.15172	6	RTADGS	15.61
375	116	E	0.15345	11	EQDRTYLH.IS	15.69
368	113	K	0.15517	13	LYQDSNKHGTAR.	15.92
1348	484	P	0.1569	13	C.ASNETPRQKHM	15.98
837	316	H	0.15862	9	HKFARNLY.	16.02
518	215	V	0.16034	9	IVM.LTGQS	16.1
648	252	G	0.16207	15	LETAISVYGKWQHRM	16.19
523	217	A	0.16379	9	ATVFLIM.S	16.25
644	248	D	0.16552	9	NREDQHKAS	16.26
509	208	S	0.16724	11	SDQTPAG.NHK	16.37
525	219	D	0.16897	12	YFNHREQD.AKT	16.44
396	132	V	0.17069	7	LFIAMVW	16.55
955	380	G	0.17241	15	G.PHSYFNRKLIVAT	16.57
476	189	G	0.17414	12	SDAGLTEQWNK.	16.57
654	258	N	0.17586	5	NHYFS	16.64
291	94	R	0.17759	11	QILV.YMSARH	16.65
1013	399	V	0.17931	9	AVTIYF.LK	16.71
274	83	S	0.18103	11	DT.SFAVRKIG	16.78
632	241	P	0.18276	17	.HKRQMFNSTIGPDVAY	17.34
530	224	L	0.18448	5	FLMI.	17.35
747	296	P	0.18621	11	PASTEKRQHML	17.36
324	105	V	0.18793	11	VALIME.STPG	17.47
844	323	N	0.18966	6	DNSKLE	17.61
533	227	P	0.19138	14	Y.PSRQILMVATHF	17.71
414	146	P	0.1931	11	PTVDKRIASE.	17.83
730	279	G	0.19483	8	NFYHGDSK	17.9
295	98	L	0.19655	12	.LVMIKTCFSNY	17.94
394	130	A	0.19828	14	IYEKVTARSGDHQP	17.99
751	300	A	0.2	5	GSATN	18.14
124	59	C	0.20172	5	C.HMS	18.23
1010	396	K	0.20345	10	VKRHSQ.LDM	18.34
461	183	A	0.20517	13	SQDPGRTLAN.IV	18.64
513	212	Q	0.2069	15	VHLQIDTSRM.AWNK	18.65
390	126	S	0.20862	9	REGASNTLW	18.68
638	242	Y	0.21034	16	PRQMKLSYDATHWF.G	18.81
532	226	R	0.21207	13	Q.YHKRTESDLGN	18.84
453	175	A	0.21379	9	VIFLASP.M	18.86
880	351	H	0.21552	9	DEHQFR.NK	18.99
477	190	L	0.21724	14	SETANIVKQHRD.L	19.23
506	205	L	0.21897	11	YLIPFDNA.HW	19.33
873	344	N	0.22069	7	HND.YFA	19.5
1197	453	R	0.22241	12	AGTKFHND.QRM	19.52
328	109	V	0.22414	8	ILVMF.KA	19.7
450	172	G	0.22586	13	TP.DSLWIHVNEG	19.71
409	141	G	0.22759	8	GANSKHDT	19.96
395	131	S	0.22931	15	AWDGEKQVSTRLMIN	20.04
417	149	F	0.23103	6	YFCHN.	20.38
888	359	R	0.23276	11	REKHPGQM.LA	20.43
865	337	V	0.23448	13	RVLITNQFMKHY.	20.84
403	139	D	0.23621	16	DTAKMENGCRSHYQW.	21.02
1308	477	R	0.23793	11	SGRK.NAEDPT	21.22
327	108	T	0.23966	13	TEDSLQVR.KFIM	21.33
494	196	Q	0.24138	13	PT.QDLAMISVRK	21.4
125	60	G	0.2431	8	LG.RTSHM	21.43
645	249	L	0.24483	7	IVLFWMA	21.44
260	81	L	0.24655	8	AMLIV.KT	21.59
642	246	A	0.24828	6	VLIMFA	21.74
480	193	F	0.25	8	FLYI.VTW	21.79
1167	443	S	0.25172	14	G.QDEILSNPAKRT	22.23
478	191	L	0.25345	5	LIV.M	22.29
495	197	D	0.25517	15	RA.VKINGLPSDETH	22.36
750	299	R	0.2569	11	RHSQAPLKTIV	22.51
652	256	K	0.25862	16	DGEAQNSKHFTLVRMI	22.59
766	309	L	0.26034	7	VIRKQEL	22.71
889	360	D	0.26207	15	NEPLQDHA.STVRWK	23.05
294	97	S	0.26379	14	QVIPLTSNEK.FYA	23.07
540	230	A	0.26552	18	VLF.HYTIQPRNGKWSAD	23.08
838	317	A	0.26724	6	ASPTE.	23.13
885	356	G	0.26897	13	GDNYK.HFQLMTR	23.41
1020	405	N	0.27069	13	DGFNSEQRMA.TK	23.42
526	220	V	0.27241	5	LIV.F	23.48
496	198	S	0.27414	16	ARV.HPYFQILNGEDS	23.49
835	314	N	0.27586	11	NYHRTQSFLG.	23.55
1248	463	D	0.27759	13	GAQRYHNSE.DFT	23.56
482	194	S	0.27931	15	TKRNQDSIAMP.LHV	23.58
326	107	L	0.28103	7	VMIL.TP	23.64
123	58	T	0.28276	10	QENDHT.MIS	23.66
391	127	A	0.28448	13	QRPLKSGAYFIMV	23.75
763	306	H	0.28621	12	NYSFKHD.TQEA	23.76
424	153	H	0.28793	11	DNRESQTV.HL	23.77
381	121	S	0.28966	13	TIFKVMDL.YWRS	23.8
325	106	T	0.29138	14	NTASDKFYH.CQLE	23.89
646	250	Q	0.2931	15	RQLTESINVK.FMAG	24.08
1044	413	Q	0.29483	11	GDNKISTEAQ.	24.19
853	332	R	0.29655	14	SDNRE.YGLCFKHQ	24.33
1180	448	A	0.29828	14	CLKRT.SEQIMPNA	24.4
1533	514	C	0.3	16	CIKAR.GWMSLHNTEV	24.62
1680	567	R	0.30172	14	.GNSCYFKIVLRQA	24.63
367	112	G	0.30345	13	LVGEDN.SKFRQT	24.7
1688	573	R	0.30517	16	.SPTAKEINGQRVHFD	24.74
460	182	L	0.3069	15	ITYFLQAMVHDK.SN	24.78
479	192	A	0.30862	17	TSARIEDVQHY.MLFPN	24.79
380	120	V	0.31034	7	TIVLM.F	24.82
740	289	K	0.31207	11	QLSEKAMRHCV	24.84
887	358	Y	0.31379	9	YFLKTW.HV	24.85
534	228	S	0.31552	15	Y.AGQNDHLSKREPT	24.9
483	195	M	0.31724	11	ILFVTAS.MPG	24.95
703	272	L	0.31897	14	N.KVMQIYPLREFT	24.95
452	174	E	0.32069	13	QSDKAVG.ETRHL	25.14
878	349	H	0.32241	13	NHFYGQSLRVM.K	25.18
522	216	T	0.32414	13	RHKTMSAEDQG.L	25.29
1142	431	E	0.32586	15	TSGINA.HLVEKPQR	25.49
872	343	H	0.32759	11	HDYRN.EQKGA	25.54
542	232	D	0.32931	16	.QDNATSYEGHIVMKL	25.57
1656	547	I	0.33103	16	.VGKEPYLNTFRIMAH	25.59
643	247	T	0.33276	14	ETKVYDNSMHQRAG	25.72
473	186	D	0.33448	18	PVYILFRQCSNTKGM.DH	25.98
451	173	P	0.33621	14	TD.FEKQHRGSNAP	26.09
456	178	F	0.33793	15	SDILTKQREVYN.FA	26.32
956	381	A	0.33966	11	VSTAIG.QHFR	26.34
848	327	Y	0.34138	11	D.WLKFYAEVN	26.41
302	100	R	0.3431	17	.PQERSLNDHFMAGKIT	26.46
109	47	A	0.34483	10	ILFT.MVAKS	26.64
735	284	D	0.34655	13	SAKRDQNHTFMEG	26.64
1669	556	P	0.34828	17	.NYTGSFQIVLAPKERC	26.68
1012	398	G	0.35	14	NYRHQTGFSK.EAD	26.71
743	292	Y	0.35172	3	YFH	26.75
499	201	P	0.35345	13	DQG.NETPAVSFH	26.75
507	206	D	0.35517	15	YANGFQPTS.WMEDH	26.77
261	82	T	0.3569	11	NVTEA.ILQCG	26.99
100	42	P	0.35862	11	GPEQDTNA.SV	27.06
543	233	P	0.36034	17	.NEWQGKRILAVMFDPS	27.23
746	295	R	0.36207	12	KRVAQLTHFISW	27.24
458	180	A	0.36379	18	NT.SEKRLYDGQFVIAPH	27.34
1473	506	W	0.36552	14	YSFTQHNLAWE.IV	27.39
430	159	G	0.36724	14	SGRNDP.KEQFLHA	27.48
1643	540	G	0.36897	12	YPFSLVW.HNRG	27.5
1195	451	S	0.37069	17	PNVSI.AHLYFRKGDTQ	28
98	40	C	0.37241	13	LPIVT.RDCFQSM	28.21
1667	554	V	0.37414	16	.HDTGNELSQRVIMFA	28.32
535	229	T	0.37586	17	TD.SRFPGKLINQMEAV	28.36
1394	493	S	0.37759	18	CFY.QSHELPTVANIRMK	28.39
952	377	H	0.37931	13	YNTHSD.EFPVQR	28.5
329	110	P	0.38103	14	DSN.HKPEVRTGQA	28.56
531	225	T	0.38276	16	KA.ELTHVISYMQNDR	28.58
847	326	L	0.38448	10	LIMEVDYRAT	28.62
529	223	V	0.38621	16	AQSTVYHRKND.IECL	28.63
855	334	S	0.38793	12	TDNYHGLF.SRI	28.66
528	222	V	0.38966	8	FVILMA.G	28.7
1668	555	L	0.39138	18	.CDEARGFVPKNTSIQLM	28.74
276	84	P	0.3931	18	.DINESHTRYAFVGKQPL	29.11
369	114	A	0.39483	14	SPQG.RTAHEKMLV	29.12
753	301	T	0.39655	15	GSTIDNERALVFQKY	29.23
457	179	P	0.39828	15	TQESGPDNRHAMIK.	29.36
449	171	P	0.4	17	SE.DGATQRIKNYHVLP	29.4
1678	565	L	0.40172	13	.LDRVTSGMNQFI	29.54
851	330	S	0.40345	13	PS.TRVNKGHQAF	29.55
122	57	S	0.40517	14	PTSNL.WVQAEDGH	29.63
744	293	C	0.4069	15	HNRKWSQFVELMCYA	29.83
701	270	G	0.40862	16	Q.LFDGWTIASNKRHE	29.97
280	85	G	0.41034	19	.TYPLVIQDSGERNAFMKH	29.97
320	101	A	0.41207	16	.LMNESAFYHRIPQGT	29.98
110	48	A	0.41379	14	SQEPLFRT.VAMDI	30
288	91	L	0.41552	13	TSR.FEKIANPLQ	30
1042	411	F	0.41724	9	YFH.MILWN	30.04
384	122	L	0.41897	7	IVMLAF.	30.06
726	277	R	0.42069	16	QESVGHALKFRTDIMN	30.2
1671	558	R	0.42241	17	.PILVCYEFARGNQKDS	30.27
732	281	E	0.42414	15	QGTEDKMARVCSHFY	30.36
833	312	S	0.42586	13	EDNQRMKSHT.GI	30.42
541	231	G	0.42759	19	DIT.VPLASGRYFHMENWQ	30.55
385	123	R	0.42931	15	TVQRFMDEK.SHYLW	30.6
563	239	V	0.43103	16	ADNSTLPI.VMQHEGY	30.8
550	235	D	0.43276	19	G.MVLSPQRNWFEHKTDAY	31.03
435	161	L	0.43448	18	.EAIDKGVTPYHSRLQNF	31.03
852	331	G	0.43621	17	SNADTLEYF.KGQHWRM	31.14
444	166	N	0.43793	16	NDLPVTISEGARWH.K	31.17
1249	464	Y	0.43966	11	SHYTFQ.KDAL	31.25
474	187	G	0.44138	17	RSNKQPTEDYAV.LGMI	31.41
1674	561	W	0.4431	17	.IKFHPDYALVTNMWQR	31.7
702	271	H	0.44483	15	P.NLQHGKRIVSTED	31.72
301	99	P	0.44655	18	.TDIFWRSKAYQENMLPV	31.76
1300	471	G	0.44828	18	C.VDRANSQKETMHLFGI	31.81
1655	546	L	0.45	15	N.TAVMLKRHIDFYP	31.85
454	176	L	0.45172	14	VINYLKTR.MHQFA	31.88
118	53	V	0.45345	12	LASVT.WINFMD	31.89
1379	489	A	0.45517	17	G.ADHLSKNTQRPMYEF	32.04
1303	474	G	0.4569	16	.DNHQESATRLIGMYK	32.1
1672	559	D	0.45862	15	.GATQWDKNHPSLRE	32.21
411	143	S	0.46034	14	TSNPLGDKAEYHVI	32.48
500	202	G	0.46207	18	AL.ERHNYMSIFQGKVTD	32.6
1005	392	Q	0.46379	14	QANIRDHMKS.EVT	32.89
1074	417	P	0.46552	18	AGCN.DKEHLSFVYTRQP	32.95
281	86	G	0.46724	15	.TVNGASFLPKERDQ	33.05
256	77	S	0.46897	17	PM.LRQNVTEKGHASFD	33.09
737	286	G	0.47069	9	DGENQRAST	33.09
762	305	S	0.47241	16	PARG.KTSDNQEHLIV	33.15
387	125	C	0.47414	16	ASYGFLNEQKR.TCHI	33.3
108	46	N	0.47586	13	DANLMEHI.QKTS	33.33
764	307	A	0.47759	14	EVPSNQMAT.KIHD	33.37
113	49	L	0.47931	15	PS.RVKLETQYHDAF	33.37
1072	415	R	0.48103	17	DP.LTRQIHSKYEFAWN	33.39
995	390	T	0.48276	17	TSVGNIAL.FPQDEKHY	33.5
893	363	R	0.48448	14	AVKRMLEYPQHIT.	33.57
886	357	F	0.48621	9	FYLSHA.WN	33.65
1071	414	S	0.48793	15	DHN.APEIYTSLGRQ	33.81
549	234	R	0.48966	18	F.SEDHAPNTRYQKLGWI	33.86
1650	542	R	0.49138	17	.LSEDNIGPTFYVHKAR	34.05
975	387	N	0.4931	18	DNAGETCKVMQ.FSRIHP	34.07
1670	557	W	0.49483	18	.PLKRWFHYSEATMNDVI	34.29
1309	478	G	0.49655	15	CSTGADN.IVQKERP	34.32
1676	563	R	0.49828	16	.EDQLVIRYHNSFMKT	34.44
1663	550	R	0.5	17	CS.LMPEDRTKNQHAGY	34.46
404	140	H	0.50172	15	.RGDANTFYKSHELP	34.53
1145	434	S	0.50345	18	G.AKNDQREVLFTSPMYI	34.55
564	240	V	0.50517	18	THE.LASFPYQRKDVIGN	34.7
1273	467	Q	0.5069	18	YFQ.KHWISCNTDMRLEV	34.78
397	133	A	0.50862	14	SALIKTRQWCVYFG	34.8
1697	576	R	0.51034	17	.VTLSNIEQDAGPKRYW	34.85
1218	458	K	0.51207	12	ASDNGQE.KVYR	35
516	213	D	0.51379	15	QDNEWKYG.STMAHR	35
293	96	E	0.51552	17	AENTHRPQSVIKM.GDC	35.1
257	78	P	0.51724	10	APSILV.TNG	35.1
121	56	S	0.51897	10	QASNT.LDIH	35.21
1698	577	C	0.52069	16	.GTIVLYCPKADSFQR	35.24
233	68	D	0.52241	17	A.TNGDHSPIEQRMKFY	35.31
902	370	A	0.52414	12	AVPITRSFLYGH	35.4
1701	580	A	0.52586	16	.IVETNDRGPKASQLM	35.66
992	388	Q	0.52759	17	VPREKLQN.TSIAMDHG	35.67
1681	568	L	0.52931	17	.RKPHDTENIYFGLASV	35.86
1302	473	R	0.53103	16	.CEVKGNDSARYLTQH	35.99
1289	469	A	0.53276	17	.PELDRKNQAHMTVSIF	36.01
1687	572	E	0.53448	17	.RTKSEDQGMFIPVANH	36.02
836	315	G	0.53621	12	GENDSMIQRLH.	36.04
1043	412	Q	0.53793	17	FYWTHALIMV.ERKNQD	36.38
434	160	R	0.53966	14	.MILSQKEFVPATR	36.42
102	44	L	0.54138	17	DALVHFYNK.TPMSWQI	36.56
285	90	P	0.5431	17	SG.KNDRMVATLQPEIW	36.6
964	384	K	0.54483	16	N.KGDSPAVETQMYLR	36.66
471	184	Q	0.54655	18	.LTSIAPNQDFGVEHYMR	36.75
1654	545	G	0.54828	19	AD.CGFLMYPKESNTIVQR	36.78
1699	578	S	0.55	18	.RLIEQANDSTFKVYHWP	36.8
842	321	R	0.55172	14	VHYFETLNRKIQSM	36.81
1652	543	G	0.55345	16	A.IHRQPDTSVELNGK	36.92
957	382	A	0.55517	16	TEVRK.ALIQSHGMYP	36.98
1661	548	A	0.5569	16	NLDGSHF.PVIRAMTC	37.13
1380	490	V	0.55862	15	.YRQSEKGATDNVIL	37.25
562	238	A	0.56034	18	IL.ASVQTFKEDNGPRHW	37.26
895	365	L	0.56207	16	IRLPTFKDHAVMWQE.	37.55
447	169	A	0.56379	18	ILPASRDNVGQKHETYF.	37.76
658	262	S	0.56552	15	SAQDENRMLKIGVFY	37.78
508	207	S	0.56724	18	NACKDYQRH.WFVTSPLE	37.81
1700	579	A	0.56897	16	.DKIVSCGPRATENHL	37.83
1039	408	A	0.57069	16	AKMNHQILVR.SEDGT	38
1631	529	G	0.57241	19	GNL.FYAEKDHRQITVPSM	38.08
87	30	C	0.57414	19	DA.EVTFLSPNQGRYICKH	38.09
446	168	P	0.57586	18	AQNYTKPLIVRMG.WHSE	38.23
97	39	G	0.57759	19	CEDM.PLTSAIHQVYRGKF	38.25
1535	516	C	0.57931	18	GACPNDKR.TSVIMEQLF	38.26
445	167	G	0.58103	19	AQVTDEGPSRLIHNY.KWM	38.5
322	103	L	0.58276	16	ADRNQHEPLFTGS.KV	38.55
1073	416	S	0.58448	19	AE.QFDIPNKLSMVYRGTH	38.57
475	188	S	0.58621	16	TNSDGKHRQCLEAP.V	38.62
107	45	V	0.58793	17	PDGERSK.TVLFAWIMH	38.77
877	348	R	0.58966	17	PIQRTKDHYAVNML.FS	38.96
259	80	L	0.59138	11	LFYMN.HSAQK	39.08
687	268	T	0.5931	16	DPSTRGNHEQA.KVYL	39.11
1196	452	Y	0.59483	17	GTQEICHDRVM.YKNSA	39.19
1274	468	V	0.59655	19	NHWG.FVITSDRAKEQMLC	39.34
1666	553	L	0.59828	18	.CDGYHMSFANIVETKQL	39.39
854	333	R	0.6	15	RFQHY.VKSCTALIM	39.43
1221	461	K	0.60172	20	PSVKRNDCLFWA.TIYMQEG	39.74
1472	505	L	0.60345	19	FRGESNHKQTDIA.MVWLY	39.74
560	236	M	0.60517	18	QV.TEHPSADRNKMLIGY	39.78
884	355	E	0.6069	18	APDKESQLTHFNRYW.VI	39.94
892	362	G	0.60862	17	AGSNTKRDLQEYVIMH.	39.94
840	319	R	0.61034	16	ASRIVTMEKDQGYNHL	39.97
120	55	A	0.61207	10	GPILASTVN.	40.01
724	275	D	0.61379	14	DAENLSQVIMTRKH	40.05
1194	450	G	0.61552	16	GSNRYHQF.LPKMAVD	40.22
870	342	R	0.61724	16	QMLETYKRIGNDASV.	40.33
1395	494	G	0.61897	15	LNKRDS.HAQGITPE	40.36
561	237	E	0.62069	18	P.TSFAEQYRDNHKLIVG	40.36
1397	496	E	0.62241	16	CQNGEDTFVAYHK.SM	40.46
1642	539	A	0.62414	20	KTEYFNH.WSRQGPACVDIL	40.54
953	378	P	0.62586	17	EAGSPRKT.LIHVDYFQ	40.65
1350	486	A	0.62759	18	EDSPVK.RQTALGIYFHN	40.71
1673	560	A	0.62931	19	.TGNERKLDSIAMQHFVYP	40.83
323	104	N	0.63103	18	TRNESGKPAHQ.VMFDYW	41.02
442	164	P	0.63276	18	AGQDSVRE.PHTKLMNYI	41.06
1018	403	T	0.63448	16	TLAQKRHNMPY.DSFE	41.06
423	152	S	0.63621	19	ERSDQKWLFTNAIPVYHG.	41.21
448	170	G	0.63793	19	TDNEFKSPGHARQVLIYM.	41.25
1161	439	Q	0.63966	17	DSNHEY.VFRLQTPAIM	41.41
830	310	A	0.64138	13	AKIPREQSTM.VL	41.42
891	361	P	0.6431	20	PADIVLMGS.RYHEFQKWTN	41.52
897	367	D	0.64483	16	AHNSDIP.ERYQGFLV	41.54
722	273	I	0.64655	18	M.EIKNLFRVTAWQHYSG	41.73
1497	513	A	0.64828	17	.CAGKVQEDRSTLINHM	41.88
959	383	G	0.65	16	GS.RNADLKEQTVHYP	41.91
1682	569	Q	0.65172	16	.LTPSVIAEMGNQDRK	41.93
1164	442	D	0.65345	17	TNSG.QDPVEIYHLKMA	41.97
881	352	Y	0.65517	17	RTVSWQLNIFYEMHK.A	42.02
1146	435	P	0.6569	19	QSEV.DTNGFHYRPAICLM	42.06
894	364	A	0.65862	19	DPSNQEGRKATFWLHYV.M	42.11
284	89	S	0.66034	16	SE.QPALRKGNVIHTD	42.25
1353	488	L	0.66207	18	ATSN.GDKQRHLEFYVIM	42.32
85	28	D	0.66379	19	AS.CDGIFLQPRNYHVTEM	42.34
1638	535	A	0.66552	18	CS.PVMGTEHNRLAYKDQ	42.44
749	298	Q	0.66724	11	ALRKHMQESGD	42.53
868	340	N	0.66897	12	DSNAGKTQEHR.	42.63
237	70	S	0.67069	13	SNTL.KGARQEDC	42.68
1662	549	A	0.67241	19	LVPSGWF.ITKRYAHQNDE	42.71
1690	575	G	0.67414	18	.VEIRTQNKDSLAGYFPC	42.78
1079	420	P	0.67586	16	SAPGEIKRLH.TQVDN	42.81
114	50	G	0.67759	17	FP.EKTQANSGYRDHLM	42.97
1144	433	S	0.67931	17	SEAGPDNV.MIQTRYFK	43.03
247	72	P	0.68103	19	VI.NHSKTDQRCPLYEAFM	43.21
1685	570	R	0.68276	17	.DNTQRESAKVGLPIMW	43.23
659	263	R	0.68448	16	SKRETADHVQNGYWLI	43.27
428	157	D	0.68621	17	.FSYDAVITLQENRKHM	43.29
282	87	T	0.68793	17	A.YRSDTGKMVENQLIP	43.48
441	163	A	0.68966	16	MINDQAT.VLSRPGHK	43.62
1021	406	R	0.69138	15	SMQETRHKLVA.IYD	43.78
1536	517	P	0.6931	19	PGNFDALTSRKE.QHYVIM	44.05
254	75	A	0.69483	16	ASQR.TGYNPMVKDEH	44.15
511	210	V	0.69655	17	DVREALSGHQKTY.NMI	44.38
141	64	T	0.69828	16	APSDGV.EQTFLHNKI	44.42
1686	571	R	0.7	20	.QEMYHRVICPAGTSLDNKF	44.66
402	138	Q	0.70172	18	SNRIKEVFDQYPAWTHLM	44.68
1641	538	G	0.70345	21	HNPGR.TKQIEDYALVMSCFW	44.74
1677	564	R	0.70517	19	.ESVITMCPAGNYLQKFDR	44.87
440	162	P	0.7069	20	.NPEIDMLARHQWFGSVKTY	45.03
1544	521	P	0.70862	19	.TVASGEDPRILFCMHNYW	45.32
1007	394	P	0.71034	18	QETPKNDSVFILRHYMA.	45.33
688	269	Q	0.71207	19	AVGNLDRKQSTEPM.YFHW	45.41
667	265	L	0.71379	18	.SNDPQTVGILKAREFYM	45.43
1151	437	Q	0.71552	19	L.ESTYNIVGPARQFKHDM	45.7
1471	504	A	0.71724	17	EG.LDITSPAVHRNQYF	45.78
900	368	R	0.71897	19	PVSKTRIMLAQHE.YDNFG	45.78
965	385	T	0.72069	19	L.TPFISDNVAEMRQGHYK	45.85
1247	462	K	0.72241	18	AVSNFDHEQPL.TKYMIR	45.95
1483	508	P	0.72414	19	CGSLNHYFVAEIDRT.KQP	46.14
1649	541	G	0.72586	18	.SNDRTECQGMAKLYIVP	46.24
93	35	G	0.72759	19	CNEL.ARGTDQMPSVIKYH	46.31
1679	566	R	0.72931	19	.TNSLAVPHRFDEYKQWMG	46.44
505	204	D	0.73103	19	TSNDHQVAFEWPM.KYRIL	46.63
1011	397	D	0.73276	18	DAKRTPVENQLMS.IHYG	46.66
1419	499	R	0.73448	19	ADPEYQTNKLRSWGM.IVH	46.67
1689	574	R	0.73621	19	.VYFPRIAKLSTQHNDEGC	46.68
849	328	R	0.73793	16	SAPLV.DRETYQNKHI	46.75
940	373	A	0.73966	15	PEHS.MDVRALNKQT	46.77
86	29	P	0.74138	18	DE.YINVASRPQKHTCGL	46.91
283	88	A	0.7431	19	SD.AQTVHFNRYWKLPMEG	46.95
1017	402	L	0.74483	19	RDPLTEVAQSKHN.MFYWI	46.96
1105	424	T	0.74655	17	NVYSDGAH.CFKRLEIT	47.06
950	375	D	0.74828	17	GEQND.RSATPLVMYHK	47.15
510	209	P	0.75	19	ADTPLSQEFMKR.GNHIYV	47.24
1664	551	G	0.75172	18	QLRE.KNFYADIGPSHVT	47.41
875	346	A	0.75345	15	TAENQMKVIRS.YDH	47.5
1485	510	G	0.75517	18	PSGQDANTHLFMYWKER.	47.64
1346	482	R	0.7569	21	APTSQKER.LIWNHCGDVMFY	47.8
686	267	D	0.75862	17	VS.TNIKMELARGQDPH	47.81
896	366	S	0.76034	18	TNSLDAGPRYQIEHK.MF	47.92
1634	532	P	0.76207	20	CR.LVPTEKMQNAWSIYHFD	48.07
850	329	L	0.76379	16	NFS.AKTIRLQHGMEV	48.08
685	266	L	0.76552	19	VS.TIRMEHYPGALKNWQF	48.13
1162	440	D	0.76724	18	NAGEPHQKSM.VRFDLTI	48.15
426	155	D	0.76897	20	SEQPM.DNRKLTAGYCIWVF	48.7
1349	485	V	0.77069	17	GSNDA.RETFHYKMVIL	48.73
1077	419	A	0.77241	17	VEQLRSTKH.IDPYMNA	48.86
96	38	R	0.77414	18	TREC.QHVGNSDLKWFIA	48.9
234	69	A	0.77586	18	A.GVETSCPDMNQKFRYW	48.94
129	62	P	0.77759	17	PR.GTVEADKQSLNYMH	48.98
88	31	H	0.77931	19	NS.RGACHQEPDYLVIKFT	49.06
867	339	L	0.78103	15	LDITSENKVQGHRM.	49.2
904	372	R	0.78276	17	LISTENKR.APQVYMHF	49.21
1665	552	S	0.78448	16	.QPSMVDRTAGENHFL	49.22
1534	515	G	0.78621	18	STNDE.PIAGLVRQMKHC	49.29
427	156	L	0.78793	15	TESRNGDKAQHPLVM	49.31
1219	459	F	0.78966	18	DEKQVRHGTPS.ALMIYF	49.41
99	41	V	0.79138	16	YFMQVEL.HNKSTIAD	49.62
246	71	D	0.7931	19	CESRQ.YWFHLKAVDGINT	49.7
1653	544	P	0.79483	17	D.GQSNARTVHEKYPLM	49.9
845	324	M	0.79655	18	ASEIKVQLMPYRHDFNTW	49.99
1345	481	T	0.79828	18	HAGKNSDLE.PQTMVFIW	50.11
101	43	G	0.8	16	VSALI.RPQKNTMDEG	50.18
883	354	R	0.80172	15	ARSVQKTILEGMD.N	50.21
1622	526	L	0.80345	18	FLGNSYR.TEIAVDKQHM	50.21
443	165	A	0.80517	19	NPEDSRKQAITLHVMGFY.	50.32
754	302	A	0.8069	20	SDNAQKHYFGREPTMW.VLI	50.35
81	24	P	0.80862	21	DT.CAGRVSQLNYMKFPIWHE	50.35
1147	436	V	0.81034	19	LRIDVNF.EGMQSPTYAKH	50.52
1103	422	V	0.81207	16	DNHLGKSQTR.APEVI	50.56
253	74	R	0.81379	18	DETNLKV.RMYFSQHIAW	50.6
1474	507	V	0.81552	20	VAYHFKPGQLSRMNITDE.W	50.78
115	51	R	0.81724	17	TI.SQRHANMDKFPLVG	50.96
846	325	E	0.81897	16	ASTLDQKNHVIFRGME	51.01
1347	483	F	0.82069	19	QNTPLFVI.SHEMRAYDKG	51.08
901	369	R	0.82241	17	DNSEAQKLMYHTRFG.V	51.11
1406	497	R	0.82414	18	TVRPLFQK.DAEGSNHMY	51.58
1014	400	T	0.82586	17	AMRESYQTGKDVHN.IL	51.63
410	142	R	0.82759	18	EQSNTLFHVKRAMDICYG	51.78
95	37	P	0.82931	16	GA.QYHPSRKNTWEDL	51.89
1621	525	Y	0.83103	17	ANLPV.QDIFKRSGTYE	52.2
1539	520	L	0.83276	17	NSGFELDAKIR.MTQVH	52.35
501	203	L	0.83448	19	AP.ENQGSFDHRTKVMLIY	52.39
82	25	A	0.83621	21	FYI.CLAPGSRQTVNDKWEMH	52.75
413	145	A	0.83793	16	TEVQDRKAHGSLMFI.	53.09
734	283	P	0.83966	16	TPEDIRLKVSAHYMGN	53.09
83	26	P	0.84138	17	CDSQNGE.TVRAYPKLH	53.21
1632	530	G	0.8431	19	DGKNR.AQSIVCLYPHEMT	53.31
258	79	A	0.84483	18	TQEGSAD.WKNRVFLHYI	53.39
1040	409	P	0.84655	19	LPKDFINVMQAGE.RHYST	53.55
954	379	V	0.84828	20	FAPTINDVMLQRS.GEYHWK	53.61
1305	476	A	0.85	19	.STQAHYGDLIRNFEPMVK	54.17
755	303	R	0.85172	20	SDTNIVELRKQAPHG.YWFM	54.26
1637	534	A	0.85345	17	EPSTQK.DFHANRIVLG	54.39
1484	509	A	0.85517	19	DHSFLEQVTAMPIGKY.RN	54.91
142	65	R	0.8569	20	ESGKI.VHLATNPQRMFWYD	55.07
1343	480	W	0.85862	18	.LIEVAFYTPSKRMNQDW	55.16
1134	429	P	0.86034	18	VFKDGSQNIL.MRHEAPT	55.22
1487	512	A	0.86207	20	C.SADTPENQKHGFMVIRYL	55.24
993	389	T	0.86379	19	EKVIMASTF.LGQHDNPWR	55.29
1623	527	L	0.86552	18	RECFV.TIKASNLDMPYH	55.59
1202	456	L	0.86724	18	QRKTYDINEHP.SGMFLA	55.72
1675	562	T	0.86897	19	.SWEPVDHQALKRGTNYIM	55.81
1538	519	L	0.87069	17	ASREDGTLI.VPYMHKQ	55.98
1630	528	L	0.87241	19	DEFTILG.NAWRQPYKSVM	56.33
248	73	R	0.87414	19	ARFVQSL.DNWPEIKYGHT	56.39
1181	449	R	0.87586	19	YPTLEAG.SNHRKQVDFIM	56.46
1620	524	R	0.87759	18	SRILQK.GEYFDHNTVAM	57.02
50	2	P	0.87931	19	.TLGEQMKPHSFAYWCIVR	57.02
738	287	R	0.88103	17	ESRHMLQYTKADNIFVC	57.08
1640	537	G	0.88276	19	IAPTEDR.VWSGYKMLQNH	57.58
1351	487	V	0.88448	18	.TEALHSIVFMQRKDGYN	58.04
761	304	E	0.88621	14	.EDQNHRYTKASLG	58.09
1546	523	R	0.88793	19	QSANPTEF.IDKGLVYRMH	58.26
228	66	A	0.88966	19	VEKQLPY.TIHMRWFNDSA	58.44
62	14	T	0.89138	20	.ENVILSAPFGRKMCTYDQH	58.49
1635	533	G	0.8931	19	VPDNS.ITYWKREAGQLFH	58.87
839	318	R	0.89483	16	DLTNSRKEVMIHAQY.	59.31
1639	536	A	0.89655	19	PSMAKLV.TNEGDRQHYIF	59.42
1301	472	A	0.89828	18	KINTDHQREGPL.ASWVM	59.85
80	23	P	0.9	19	VDMFLIRK.ASTYPENQHG	60.11
1201	455	S	0.90172	18	SQLRVNKPG.ETAHDYIF	60.22
1545	522	G	0.90345	18	.AGVTIQLRSEMDKNFPH	60.27
1169	444	H	0.90517	19	QKADLRHE.NYTSMVGIPC	60.29
51	3	G	0.9069	19	.LGVDFAWIMRTNSEQCHP	60.37
1537	518	R	0.90862	18	NTVPRELAK.FWYDHQSI	60.79
117	52	E	0.91034	19	SGKYIHRNA.QLFMPTEVD	61.08
69	21	P	0.91207	20	.PIVFLEYTNAMRSGDKQHC	61.48
1176	446	K	0.91379	19	EASLQKFP.ITVHRYNDMG	61.78
1486	511	D	0.91552	21	LQGS.AWIVEPTMYDKHNFRC	61.85
1633	531	G	0.91724	21	TLRAQ.NKDHYPEIVWSGFMC	62.08
59	11	T	0.91897	19	.SQDVEFRNPWALMGKTHI	62.36
89	32	D	0.92069	20	VQLDE.AYMTHGFSNRKIPC	62.79
1304	475	E	0.92241	19	.APDLIFVYQTSGEMKHRW	63.67
63	15	L	0.92414	21	.TGSKCNDFLMVAPRIWYHEQ	63.76
94	36	A	0.92586	17	N.GSTVLDEAKHRFQPC	64.08
52	4	W	0.92759	20	.EMIKPFLSGQRHADVNCWT	64.42
1385	492	R	0.92931	18	TNQSVKEMPDH.AIRLYG	64.44
91	33	E	0.93103	18	VFILYG.QSNTADPRHEK	66.15
58	10	L	0.93276	21	.GMTPCWARLFQSEYIKVNDH	66.24
1407	498	A	0.93448	20	CRATQSYKIVDPM.NHLEGF	66.3
1106	425	P	0.93621	19	NVPTSILGEF.MDAQRYWK	66.36
53	5	P	0.93793	21	.IVSELMTRQDPFYGCANHKW	66.59
1163	441	C	0.93966	20	RTSNILEYHFD.VMQACGPK	66.72
92	34	G	0.94138	20	TSPVR.EHADQNGLCIFMYK	67.01
61	13	G	0.9431	20	.FLVYKMTIGHAQNESPCDR	67.19
1396	495	E	0.94483	18	EGPDAKTYF.VRQSLNHI	67.27
68	20	S	0.94655	20	.SDANELVTPQWCRIFYGHK	68.19
55	7	G	0.94828	21	.MCFNSGAIVLEQPKYRDTHW	68.23
1143	432	D	0.95	19	LIPSTVR.QHAEYFKDNMG	68.3
54	6	W	0.95172	21	.LMIGKFVESARQHDTPNCYW	68.41
65	17	A	0.95345	20	TFLRINGEV.MSWAPYQKHD	68.67
70	22	G	0.95517	20	AFYRGLQCIE.TKSVPDNHW	68.77
67	19	L	0.9569	21	DGQHNPF.VCSTLWYIAERKM	69.17
60	12	A	0.95862	21	.QALDVYSRIPFWHKEMCTGN	69.18
119	54	L	0.96034	20	ILYHRTPS.KWGVAMFEQDN	69.37
56	8	L	0.96207	20	.PTVLQKSRAWFDHIMGCEN	70.17
57	9	L	0.96379	21	.GVLEYCRMQSATFPKIWNHD	70.19
66	18	A	0.96552	21	CMILS.TAGVHNFPEQRYKWD	70.81
64	16	F	0.96724	20	S.ILKDWYCGVMFPTAHQNR	72.53
49	1	M	1	19	.AGERLQKFYPIDWHCMVT	72.57
84	27	A	1	20	.YTISKLACRNQGEPMDHFV	72.57
127	61	R	1	19	.RFTLSDNEQVYHKPIGAM	72.57
135	63	A	1	14	.MPGSERQTYKHAL	72.57
321	102	P	1	11	.ENDHSPQTRG	72.57
459	181	P	1	11	GK.RVPSQAYF	72.57
1107	426	I	1	7	.DIMRVT	72.57
1108	427	P	1	8	.NDEPVTK	72.57
1109	428	G	1	7	.HGIQAE	72.57
1177	447	P	1	9	.HPNKQRDA	72.57
1200	454	I	1	7	.VIMSLF	72.57
1250	465	A	1	6	.VAQPI	72.57
1251	466	V	1	5	.LFVI	72.57
1290	470	V	1	7	.LSIMFV	72.57
1342	479	A	1	5	.ADGS	72.57
1443	500	R	1	15	.GHKTSAQMRIPFDW	72.57
1444	501	G	1	11	.GDTAEHFSMK	72.57
1445	502	S	1	14	.DSKNARMPEHTLG	72.57
1446	503	S	1	15	.DGEKRASNTPQVIM	72.57

## Sheet: NTN4
alignment#	residue#	AA type	coverage		variability	Score(rvET)
936	304	C	0.00318	1	C	1
939	307	C	0.00318	1	C	1
601	181	C	0.00478	2	CG	1.02
556	164	C	0.00637	2	CD	1.33
969	329	C	0.00796	2	CM	1.66
1119	357	G	0.00955	3	GS.	1.76
920	293	C	0.01274	2	C.	2.05
923	295	C	0.01274	2	C.	2.05
933	301	G	0.01433	3	G.R	2.46
837	267	H	0.01592	5	QAH.L	2.75
834	264	C	0.01752	4	CSW.	2.84
521	139	P	0.01911	4	PHSA	2.89
1121	359	C	0.02389	2	C.	3.1
1124	362	C	0.02389	2	C.	3.1
1179	392	C	0.02389	2	CK	3.1
1281	434	C	0.02548	4	.CAS	3.17
1247	420	C	0.02707	4	RCF.	3.33
1268	422	C	0.02866	5	TCKS.	3.39
1134	371	C	0.03185	2	C.	3.7
1137	374	C	0.03185	2	C.	3.7
1131	368	G	0.03344	3	GR.	3.72
836	266	G	0.03503	6	GN.LRQ	3.94
1096	341	C	0.03662	4	CE.S	4.05
1278	431	C	0.03822	5	.CSMK	4.06
1118	356	G	0.03981	9	YTGKH.MRS	4.07
1218	409	S	0.0414	8	ICYSK.TL	4.12
931	299	T	0.04299	5	TVS.A	4.29
1086	334	C	0.04459	5	CSA.K	4.61
1084	332	C	0.04618	6	CRM.PA	4.62
832	262	C	0.04777	6	CAMV.L	4.69
1194	395	C	0.04936	4	.CIL	4.84
1197	397	C	0.05096	5	TC.SR	4.86
1406	449	C	0.05255	4	CS.L	5.64
1245	418	G	0.05414	7	GNDESA.	5.74
842	271	C	0.05573	6	CVAT.S	5.76
821	251	Y	0.05732	6	FAY.VT	6.52
1129	366	T	0.05892	5	TRSF.	6.8
529	147	S	0.06051	7	SLRFKVE	6.94
927	297	H	0.0621	10	KPHDQL.AGR	7.77
1594	488	A	0.06369	6	AC.SKV	7.85
839	268	A	0.06529	4	AGS.	7.87
948	316	W	0.06688	6	Y.WFPH	7.99
1525	473	H	0.06847	5	CHT.P	8
685	222	T	0.07006	8	TS.RQVDK	8.35
1098	343	F	0.07166	6	Y.FNVI	8.39
317	106	W	0.07325	7	WR.FIKY	9.1
1488	462	C	0.07484	8	C.MDKHGV	9.49
1612	493	D	0.07643	9	I.ASGDNER	9.58
1275	428	G	0.07803	9	.GESPNRAV	10
1318	446	C	0.07962	8	C.FVDLIG	10.04
830	260	G	0.08121	7	ACGSTL.	10.21
677	215	V	0.0828	10	VHARIM.LFQ	10.27
546	160	F	0.08439	7	YHFL.VM	10.57
1493	464	S	0.08599	8	CYRS.LDP	10.72
547	161	A	0.08758	7	SAVT.NG	10.98
319	108	S	0.08917	10	SA.NFTEDPK	10.98
1593	487	P	0.09076	9	EGP.SLAKD	11.08
1408	451	C	0.09236	8	C.NRKIDG	11.46
528	146	R	0.09395	7	KVARHDY	12.11
526	144	L	0.09554	6	LAFIVM	12.53
544	158	K	0.09713	13	GVRAKQH.LMFYI	12.94
540	154	W	0.09873	5	YLWF.	12.99
560	168	F	0.10032	6	YLSFWT	13
945	313	D	0.10191	7	NGD.QAT	13.17
942	310	L	0.1035	8	LGFASMNP	13.2
520	138	R	0.1051	12	LTRMVPKH.IAQ	13.28
527	145	D	0.10669	11	SQEDYKLHTFM	13.4
543	157	Y	0.10828	8	IGWYFL.M	13.55
831	261	S	0.10987	16	AEYHTSRNFKIV.GQM	13.61
688	225	R	0.11146	8	RI.KLMWQ	13.67
503	134	F	0.11306	10	FL.YPMTVAS	13.94
1201	401	G	0.11465	16	MG.PTSHYFNRKLIVA	14.69
493	126	Y	0.11624	13	IPTLYQHR.EGDV	14.73
941	309	P	0.11783	10	PVDAESTKHQ	14.95
681	218	Q	0.11943	12	KVHYRQLM.WFG	14.95
1481	460	G	0.12102	10	.GRLPQSEDI	15.25
1640	499	A	0.12261	12	SC.ATVMEQHLR	15.47
822	252	A	0.1242	9	SLVAGRTD.	15.55
828	258	V	0.1258	6	ILVSM.	15.61
652	205	Y	0.12739	14	V.PLRYMSIFAGDN	15.81
820	250	H	0.12898	9	YVHFQWTS.	16.21
1284	437	G	0.13057	11	GQHNS.DATMK	16.46
494	127	F	0.13217	10	FGIL.VDPMK	16.47
951	319	A	0.13376	6	.GASTN	16.59
496	129	H	0.13535	14	QYDSHEF.TVRKNG	16.63
1089	337	H	0.13694	10	HRA.FNLYKQ	16.73
646	204	P	0.13854	15	TPNSEAVQ.FHRLGY	16.76
701	236	C	0.14013	15	DQACR.VNGPHETLS	16.96
682	219	L	0.14172	13	FDYMLTGIV.SEQ	17.02
495	128	T	0.14331	16	MRKTIQS.DNEVYFLA	17.07
1474	455	C	0.1449	14	CY.PAVIGSRTKEN	17.12
835	265	N	0.1465	6	NSYFH.	17.2
542	156	P	0.14809	11	VPTKRIAD.ES	17.31
691	228	L	0.14968	6	LCFI.M	17.34
447	123	A	0.15127	14	A.SDGTRKPLHNQE	17.38
819	249	T	0.15287	16	FLS.DTYAHWPQRKEM	17.39
258	80	C	0.15446	11	CV.SGERAQTN	17.75
316	105	W	0.15605	10	FAYW.CSLTP	17.89
492	125	F	0.15764	9	YRFML.QIV	17.9
700	235	P	0.15924	16	YP.CGDAFNSLQREMI	17.98
1117	355	S	0.16083	12	GTSNRHYID.AQ	18.02
281	89	H	0.16242	14	HLSDV.NQGFYTAR	18.04
193	62	C	0.16401	11	CME.PYAFVSG	18.23
634	194	G	0.16561	12	DGQATSNPWKEL	18.24
825	255	D	0.1672	11	NEDHQAKRG.S	18.42
363	121	L	0.16879	15	FVL.MRIYQDNSAWC	18.44
1135	372	Q	0.17038	7	EDQHNA.	18.44
524	142	M	0.17197	7	MFILWAV	18.81
1099	344	D	0.17357	9	H.DNLESIC	18.93
507	136	S	0.17516	12	YQNSTGREVAWL	18.95
1272	426	V	0.17675	9	IVTALKYF.	19.04
1150	381	D	0.17834	13	N.DHPAEQLRSTV	19.06
928	298	N	0.17994	11	NHGFDYSKAE.	19.07
1148	380	R	0.18153	14	RSTIQHMKEPLAG.	19.09
686	223	N	0.18312	13	NEG.DYFAQHRKT	19.2
693	230	K	0.18471	13	KR.TQESGNDYHL	19.3
361	119	L	0.18631	9	FGLV.IMKR	19.45
694	231	R	0.1879	15	YDP.SRILMHVFQAT	19.47
318	107	Q	0.18949	14	KMQ.YDSLVIRHAN	19.51
829	259	K	0.19108	19	LPHGKWQRFESTAINVMY.	19.52
1494	465	S	0.19268	14	RKISL.EQCNMTVP	19.73
826	256	F	0.19427	8	IGLVFWM.	19.76
1522	470	D	0.19586	15	GND.ASPLQKMEHTR	19.78
537	151	G	0.19745	8	GNAKTDSH	20.11
598	179	A	0.19904	9	LVAPS.IFM	20.18
1613	494	A	0.20064	9	I.SDAQTGV	20.2
531	149	D	0.20223	17	DK.NGCIRSTHEAYQWM	20.28
167	53	C	0.20382	10	CVH.MSLPTN	20.57
684	221	I	0.20541	9	MSTAIVL.F	20.59
813	248	F	0.20701	18	S.QMFKNWTRDPVGHYAI	20.66
947	315	P	0.2086	12	PTEILKRASQHM	20.86
635	195	E	0.21019	13	QKVERDSTNIALH	21.01
621	190	P	0.21178	17	PVGQHRS.TALFNCDYI	21.16
666	209	N	0.21338	14	IYFDNPA.ESLHWT	21.2
697	234	C	0.21497	18	PY.LCVISEWNHATDFRG	21.21
613	186	S	0.21656	16	.DASQRGTNVPLYEKI	21.22
1269	423	K	0.21815	11	RKVHDMLSQ.I	21.24
360	118	Q	0.21975	13	DREQV.TKIMSLF	21.33
823	253	I	0.22134	8	IYVLMAF.	21.64
1128	365	N	0.22293	12	NRQHDEFYSA.G	21.87
645	203	P	0.22452	16	DMFAPSL.RNGQVHEY	22.17
678	216	Q	0.22611	15	QRAMH.SLVWYIFTK	22.19
1288	441	F	0.22771	12	LFM.NYHREPAW	22.29
523	141	A	0.2293	16	ATGSQFWEDKRIVNLM	22.32
1675	508	C	0.23089	19	FC.IVSYTNAEDLHKGPRQ	22.39
522	140	A	0.23248	14	APKRIYHEQDTVGS	22.43
1120	358	V	0.23408	13	VRNIQFMHYTL.K	22.54
545	159	Y	0.23567	9	FYAH.MICN	22.61
674	212	S	0.23726	12	DQNSG.AHKPTI	22.8
1716	520	C	0.23885	14	PEC.TLAGIRSKVM	23.02
349	115	E	0.24045	10	V.EAITPMLS	23.05
833	263	F	0.24204	18	FHYSTLADGQKREN.MIV	23.27
1108	353	N	0.24363	14	.YNGSLCRFKHQDE	23.3
1785	536	H	0.24522	15	.EDHPQGALRVSTKN	23.34
1093	338	A	0.24682	6	S.ATEG	23.39
168	54	G	0.24841	11	GDSR.TPEQNM	23.43
970	330	R	0.25	12	EKQRTVIMLDAS	23.64
639	198	F	0.25159	11	HLTFYI.WVRA	23.77
247	77	C	0.25318	14	CKVHI.SGATNDPL	23.78
166	52	T	0.25478	13	TESN.ILGPRFQV	23.79
965	327	N	0.25637	14	.NHFDSLAEYGTQR	23.82
1140	377	G	0.25796	14	EHGFNQLMYKD.TR	23.82
302	97	S	0.25955	17	F.YSRTADVGKQPELHI	24.11
1133	370	Y	0.26115	14	KQFNYMHSRG.LED	24.12
1576	481	V	0.26274	12	ALVF.MISDNYR	24.14
643	201	L	0.26433	16	MLVQA.IHRKNTFGES	24.16
893	286	F	0.26592	16	.KFQEPRGYNSDWTAH	24.17
322	111	D	0.26752	17	VLTGDA.SNMCFRIYWK	24.23
1784	535	A	0.26911	18	.ADCTGSIVNMLYHKFRE	24.28
1279	432	D	0.2707	15	.DSQRNHKGTLFMEA	24.32
940	308	A	0.27229	11	LQMKAERCHVS	24.33
1147	379	Y	0.27389	7	YFTWVH.	24.57
642	200	A	0.27548	12	PVF.SALITMKE	24.61
1087	335	N	0.27707	10	NGYQHSFLD.	24.82
1670	504	G	0.27866	16	GK.ANEDHQRSLFWIV	24.9
286	94	M	0.28025	9	VLESM.IAT	25.24
687	224	L	0.28185	6	FIVL.M	25.3
1271	425	G	0.28344	14	NRGYHFSTAPQK.E	25.45
359	117	I	0.28503	8	ILV.MPTS	25.45
1520	468	D	0.28662	14	FVYTKD.APNSIEH	25.56
1737	532	I	0.28822	19	.SYFIECWHNVPTARLQGK	25.69
508	137	P	0.28981	16	EPSAYLRFIQMTVKDG	25.8
555	163	N	0.2914	14	DFNRSQTVEHLC.A	25.98
946	314	R	0.29299	13	KFQARLTVHMYSI	26.03
602	182	T	0.29459	14	FDVETQRISYNLAK	26.26
1127	364	H	0.29618	14	DPNLHGEAQS.KYR	26.33
497	130	L	0.29777	12	AVIMLT.FDHNS	26.48
702	237	Q	0.29936	16	PKDAQMRTEHN.SILG	26.74
935	303	H	0.30096	14	NQHDTYSAEKR.FM	26.75
950	318	A	0.30255	14	P.MAKRVSQHDLTI	26.8
287	95	A	0.30414	9	NLVFA.ITC	26.84
321	110	E	0.30573	16	NFLEK.SAQTVPYRIH	26.89
498	131	I	0.30732	15	MIKRVTL.QYSNEFW	26.92
943	311	Y	0.30892	4	FYHL	26.97
597	178	G	0.31051	14	SQVGD.EKLTRHAN	26.98
637	196	V	0.3121	7	VLNI.HM	27.02
358	116	K	0.31369	15	FTVKSYH.NLEDACQ	27.15
824	254	Y	0.31529	15	QHSAYMNKTEGVDR.	27.21
644	202	S	0.31688	16	QVEPLSDNK.FTIARH	27.22
641	199	K	0.31847	17	MRF.KNPSTAVIDQELH	27.29
683	220	K	0.32006	15	LKVMAEDGQTR.NHS	27.3
606	185	Y	0.32166	15	.FHYATQPGKMLNIV	27.4
852	275	H	0.32325	16	TG.SHPDEQRNAVLIK	27.44
1673	506	C	0.32484	16	RAC.PSKIGVQETDLN	27.49
917	290	H	0.32643	17	.NHYFPLRQIMTVECAS	27.64
129	36	P	0.32803	12	PA.QVDSETKMI	27.69
1102	347	V	0.32962	10	.LVYRATIME	27.95
1208	402	S	0.33121	16	FNTSAVG.PRDQHIEL	28.28
638	197	I	0.3328	18	NVDLIAHQY.ETSPRKMF	28.51
625	191	C	0.33439	17	LNSCPQT.IYFGRDVHM	28.53
1103	348	W	0.33599	12	.WFYMADLNSEV	28.55
890	283	P	0.33758	16	.DPEATSGVRQLNKYF	28.72
603	183	S	0.33917	15	KQPSGTDENRHA.MI	28.79
1710	514	G	0.34076	14	GTLE.NDSKMQHRA	28.93
703	238	R	0.34236	20	PATERNGHFL.KQDSIYVMW	28.96
690	227	Q	0.34395	17	VNQKDH.IEATMSLYRC	29.03
1085	333	K	0.34554	15	GNFEKDRSHT.QIPM	29.21
689	226	V	0.34713	9	VTLIA.FGM	29.29
849	272	I	0.34873	16	.STVIKALGDREFNPQ	29.38
501	132	V	0.35032	10	LIMVA.TKDF	29.38
504	135	K	0.35191	17	EYKIQR.ATGSCHNVFL	29.42
827	257	I	0.3535	16	DASEINRVTK.QLYFM	29.55
1614	495	Q	0.3551	17	R.KIQLYAVTFSGEPNM	29.57
667	210	P	0.35669	18	RDTPQS.ANYVFECGKWM	29.67
127	34	C	0.35828	13	CRF.VPSAITLGK	29.79
400	122	E	0.35987	13	G.TEDLSRKQNAF	29.91
1106	351	S	0.36146	12	.TSNQPAKGRHF	30.02
695	232	Q	0.36306	18	VSN.QDAHLYEGTRPFIK	30.13
888	281	K	0.36465	17	.NKPSAIQVLFGMETDR	30.45
1589	484	K	0.36624	16	ENGKTASDQFH.IRVL	30.51
1198	398	H	0.36783	13	NSDHE.YPQRTFV	30.64
727	242	N	0.36943	19	SC.MNPQRGAKYEDTHVIL	30.67
732	246	Q	0.37102	19	KR.SQTLFDEAHVNYGPWI	30.77
932	300	A	0.37261	17	AIMDTGEKRQCVSHFY.	30.78
599	180	I	0.3742	15	TIFSVR.LMQANYKH	30.8
731	245	P	0.3758	17	LT.PIASVNMDGHYFKQ	30.86
1909	577	T	0.37739	16	MWILTVKA.RSCFEDY	30.89
916	289	V	0.37898	16	.NVDQRKSTGEHILPA	30.91
1676	509	K	0.38057	18	VLKQR.NAITYFGDSEHP	30.97
1574	479	R	0.38217	15	YFRWC.MIKNEQHLT	31.17
653	206	D	0.38376	16	I.GFDHARTKPEVNSQ	31.22
1876	551	V	0.38535	19	NLVGCI.EPYAQRHSFTDM	31.23
924	296	K	0.38694	15	ERQKTADIMNSV.LF	31.53
1945	587	Y	0.38854	18	SGLFIYN.VAKDHQMTER	31.79
582	176	K	0.39013	19	N.PQVKRSHETLWGMIADY	31.8
1107	352	G	0.39172	17	.NGQDHASELTYFKWRM	31.83
165	51	T	0.39331	17	STW.PICQNYHEDGVAL	31.89
310	99	F	0.3949	16	.ANFPVKEGSRDTQLY	31.92
944	312	N	0.3965	17	NYWSHQFR.MKLACVIE	31.99
135	42	A	0.39809	14	TVLA.MEDFIYSKP	32.03
850	273	P	0.39968	20	.PSHGRVINTMQFYEALKWD	32.05
1572	477	D	0.40127	16	GEARDHNSY.QTVMFK	32.15
696	233	S	0.40287	19	TFSKRP.GDIMAEVQLYHN	32.2
704	239	N	0.40446	19	TSLINVFYRHM.QAGDEPW	32.21
488	124	E	0.40605	16	VPNAHEQKRML.STIW	32.39
502	133	M	0.40764	18	LHYIVMRDETK.QSPWFA	32.56
1225	410	V	0.40924	16	NDAVQE.SHPTIFCRM	32.85
725	240	D	0.41083	17	.GTNDHYLKAESQIRFV	32.87
1950	592	H	0.41242	16	CV.PHTYALISRGMDF	32.89
201	70	L	0.41401	16	.AKLTQDPGMSERNYF	32.96
1285	438	Y	0.41561	9	FYHL.NTIW	33.02
362	120	D	0.4172	15	NPD.RTHVSGKQALE	33.12
1787	538	K	0.41879	19	.QTKERVASGIPDCNHLFM	33.15
889	282	A	0.42038	16	.SQAPTDENFIHGVLR	33.35
315	104	T	0.42197	16	TKR.FEIANSPLVQDG	33.93
1178	391	A	0.42357	14	TGYKAIVLFRHPDS	34.22
1141	378	F	0.42516	9	FSYHNLIW.	34.26
1882	557	L	0.42675	16	.TDRLGNSPVEHAQKF	34.45
1244	417	N	0.42834	17	KHNDSATLPQEFGYVI.	34.63
632	192	T	0.42994	17	SPAGTERNDYKVMI.QL	34.9
964	326	P	0.43153	16	.APTSDNRKQVGEHLI	34.94
733	247	H	0.43312	18	KS.HRNQDEGVALITPYM	35.02
968	328	E	0.43471	14	AHVPQETSIDN.MK	35.11
1463	453	G	0.43631	17	.GPSTEANIDVYLKFQR	35.12
692	229	L	0.4379	18	DGH.LTKVISANYRMFQE	35.14
1893	568	P	0.43949	16	.GDPTYIAKESLQNRV	35.51
244	74	Q	0.44108	18	GV.FNQKRDTSAHLMEIY	35.54
192	61	Y	0.44268	16	YLF.WCVHIGKRTEAS	35.76
243	73	R	0.44427	20	SN.DRGFWQYEIKPHMALTV	35.78
282	90	L	0.44586	18	PAVMLR.QNTEKGHSDFI	35.86
937	305	Q	0.44745	10	ETQDRNGSAH	35.93
532	150	F	0.44904	15	F.DNYSHKEGATPLR	36.19
1615	496	G	0.45064	16	HNSVDGPKM.ETAQFL	36.2
525	143	V	0.45223	16	YLEVSFIATGKRQWCM	36.27
133	40	N	0.45382	16	EHDN.QKPSYGRLIAT	36.32
1287	440	G	0.45541	16	SRGNKTED.QLFWYHA	36.38
605	184	K	0.45701	18	.EGNRKVSPQAYTDHILF	36.48
1911	579	P	0.4586	19	LAMPCRSV.GTQFIENKHW	36.74
1519	467	T	0.46019	17	HNRTF.YSLGDKPVEQM	36.76
104	30	C	0.46178	17	CA.RLSGFYQKIVWTDP	36.83
1286	439	W	0.46338	16	YWTHAF.QKDSNMVER	36.84
728	243	E	0.46497	17	SK.EPHQDMRLNAVGTI	36.85
261	81	N	0.46656	18	DAKTN.PSVRHQFYEMIL	36.9
1153	384	R	0.46815	16	T.NRKYPQLEAVMISH	36.97
1282	435	M	0.46975	17	KALMQRIV.EDSGHTNY	37.04
1462	452	A	0.47134	18	.MIAGVQNSPLTFEYRDH	37.22
1214	405	L	0.47293	17	SANDRLG.KEQPVHYMT	37.37
1678	511	Q	0.47452	17	V.NDQGHKSFCRLTAEM	37.48
1591	485	S	0.47611	19	VPEYSGAL.DRQTCKNHWI	37.53
1894	569	E	0.47771	20	.PAEDYKLVIRQHMTNSFCG	37.62
679	217	E	0.4793	16	LKDRENG.STQPWMAH	37.62
1116	354	R	0.48089	16	KE.VRTASCLIQGDHN	37.64
1317	445	G	0.48248	19	GE.AYFIPTHLSCKRNDVQ	37.67
1607	490	E	0.48408	17	PFDVQESAN.HTYKMRG	37.76
1711	515	N	0.48567	17	NWRPLQK.GFTEVAMID	37.78
1095	340	T	0.48726	17	SLRTAMEKDQ.GYVHIN	37.83
1132	369	Q	0.48885	17	DPQTVKNRYMHLIAS.F	38.02
1226	411	T	0.49045	16	QR.ETPASGDVHNKMY	38.09
202	71	T	0.49204	18	.GNTVMSEHYAILPQDKR	38.16
539	153	T	0.49363	16	SRNDTKAEP.VLGYHI	38.22
1575	480	P	0.49522	18	KYNDRPG.EHISATQFVL	38.29
856	279	P	0.49682	17	S.GPIATVNFERDMQKL	38.34
1246	419	D	0.49841	17	FQTIDRHMKASVNYL.E	38.35
1088	336	G	0.5	14	NQDEGMIS.RLFHK	38.37
1962	596	R	0.50159	16	.GKMRIVLTSHNQPEA	38.42
1573	478	F	0.50318	14	FSTYQH.VDPLNRK	38.51
1790	541	H	0.50478	20	.IAQHLVERSDTMPNFWCKG	38.57
1875	550	K	0.50637	19	TEGARKDQ.IYVLPHSNFM	38.66
303	98	S	0.50796	17	D.GESVRQNTAFYMPKH	38.75
1961	595	I	0.50955	17	.NSKIVCPATGDERQLH	38.76
134	41	L	0.51115	18	IYFL.MVPQASNDEHTKG	38.79
283	91	P	0.51274	12	VFTIP.ASGLEK	38.95
1464	454	S	0.51433	18	.SIQADMRHNEVTGFPKY	39.06
554	162	T	0.51592	18	SAENTPVKYQFHRDGL.I	39.07
246	76	K	0.51752	20	DSTLEKYHP.QARVNIGFCM	39.2
1152	383	R	0.51911	17	D.TRSLGNQEYAVIMHK	39.27
1671	505	K	0.5207	18	NRGI.KQASHYFLVEDTP	39.34
726	241	L	0.52229	20	.FLSDPANTRYQKGWVMEIH	39.36
730	244	E	0.52389	17	TS.KELDNGAIQPRVHF	39.41
851	274	V	0.52548	17	DE.TLVKNRSGQMAIHP	39.59
1998	605	K	0.52707	19	T.AEKDSFQRHNVPGYMLI	39.62
1316	444	Y	0.52866	19	APDL.YEQKNSMVFRGTHI	39.68
581	175	V	0.53025	17	Y.GNDVRPAIMQLTSKE	39.95
131	38	M	0.53185	16	NVTMAS.LIFHYDQWE	40.02
840	269	D	0.53344	18	DHSLKERAQNTFGY.IMV	40.26
132	39	G	0.53503	17	TGKV.ASQEHPIRMLDF	40.33
921	294	M	0.53662	16	VPELMNAIQDRKSF.T	40.37
1907	575	G	0.53822	20	IAGRSNTDW.EMVQPFYLCH	40.4
1786	537	D	0.53981	18	.FDKWENYALHQSTVGRI	40.41
163	49	A	0.5414	13	TYAL.VSPGICKQ	40.42
1521	469	I	0.54299	18	SDLKNIGVCT.EYQAHPR	40.43
1971	600	L	0.54459	16	VYILPS.ANFCQHGEK	40.65
633	193	G	0.54618	17	SEGRNKHDITLPAV.QC	40.69
1097	342	H	0.54777	17	EHFKRDVYTSIAL.QMN	40.72
196	65	S	0.54936	18	QPGTESLY.AMDVRKHNI	40.85
311	100	R	0.55096	17	.DPTRSMVENQLIAGYK	40.93
1175	388	A	0.55255	17	HPCEAIDSQNGVLF.RY	40.95
1964	598	G	0.55414	19	.LFYHGSCPTKIMVRQEWN	40.98
1990	601	I	0.55573	18	TQVLIC.HAMRKNDSFYG	41.03
619	188	P	0.55732	21	IVDPLTNHSKMAE.GQYCRFW	41.04
1609	492	E	0.55892	19	QVGLEIRHND.KASFTYPM	41.1
1185	394	P	0.56051	16	GLPRSANH.KEMDVQT	41.12
320	109	A	0.5621	18	RGISAQEM.VTDPNCKHL	41.18
1173	386	F	0.56369	19	LFYSIVAMPQRNTKWDEH.	41.53
1871	546	V	0.56529	20	YARLGVKS.EPIQTNCHDWF	41.55
1277	430	R	0.56688	15	.QKRLNHWTSFYAMD	41.58
2053	607	F	0.56847	17	TPNEAFRQ.GSDKYILV	41.6
312	101	F	0.57006	19	.VNIQFRYWKTHLPSDAEG	41.6
164	50	D	0.57166	12	NSTELDI.HQGA	41.73
1991	602	V	0.57325	16	MILVF.NSRQEWYKHT	41.74
1321	448	P	0.57484	15	APERLH.STQVKDNG	41.91
2086	625	R	0.57643	19	DTERYQN.PSLCAGFVMWK	41.97
277	85	P	0.57803	18	PGVTHN.QYSEFKLAMRI	41.98
285	93	A	0.57962	14	HEYGSAN.QLFMKT	42.37
1123	361	D	0.58121	11	N.DSGQAEKRH	42.58
583	177	K	0.5828	20	R.DSKNGHAQTEFPYILMWV	42.62
1020	331	T	0.58439	16	DPKSQTRMA.VEINYL	42.85
1212	403	A	0.58599	18	IGSDALVEQR.KTHMYPN	42.91
620	189	F	0.58758	20	NAGEQFTSVD.YLMIPRWKH	43.02
668	211	Y	0.58917	19	VYDEQRH.WFPNASTGLCK	43.02
1540	474	E	0.59076	13	DNSE.AVKGRQPY	43.06
1478	459	T	0.59236	16	GTSN.AIYDKHRPQVE	43.08
161	47	L	0.59395	18	AVLW.ISNGPFCMDTYER	43.17
841	270	Q	0.59554	18	THVEQRSGKADN.YFWLI	43.25
1878	553	K	0.59713	21	QADGKPCTLERMVNWS.IHYF	43.3
2081	620	M	0.59873	18	EPNLMI.FVQCRGDAKST	43.49
563	170	L	0.60032	18	TLEMVIASPRQHDNFG.Y	43.56
1125	363	Q	0.60191	17	TPLGKQIMRENASVDY.	43.62
1586	482	H	0.6035	16	SDTHAGE.NMQRKPWI	43.63
1139	376	P	0.6051	20	PTSNQLEDAHKIV.YFRWMG	43.66
2075	614	S	0.60669	17	NVGTLSFR.IAMEDPYK	43.72
1869	544	V	0.60828	19	LVFKRC.AYDGTSHQEIMN	43.84
1917	585	L	0.60987	18	FYILTSQVE.MRGDNAHP	43.89
1595	489	W	0.61146	17	ETDWQKRSI.NLHAPVM	43.89
1199	399	P	0.61306	17	HRLQPTE.KASDGIVFY	43.97
1870	545	N	0.61465	19	RVDENYF.SHQITLAKWGP	44.07
559	167	T	0.61624	17	YVFQTDASLEINK.RMH	44.31
1897	572	T	0.61783	17	.ETSCQPVLKRWAGDNH	44.47
1475	456	D	0.61943	18	SDYEN.VHRLPTCGQAIF	44.56
530	148	Q	0.62102	18	KVDQYPSAWTHFINEMRL	44.69
190	59	E	0.62261	16	EDTNS.QVKIAPLFRH	44.75
101	27	S	0.6242	20	QANGSDE.YHPRTVILMFKW	44.76
195	64	Y	0.6258	18	ASLQYVIP.FTRHMDCKW	44.83
1122	360	D	0.62739	15	LDHEIQVMTGRSNK.	44.86
348	114	R	0.62898	18	PQ.FRNEHSMVADGTKYW	44.9
1151	382	L	0.63057	20	P.KSLRVYMETAQWDIGHFN	44.98
579	173	D	0.63217	20	T.VSDGARWHNEQPLKIMFY	45.15
1215	406	P	0.63376	19	ITNKPGAVEH.SQMYLRFD	45.27
157	45	R	0.63535	17	G.TNRVKMSDLQEIYHA	45.36
1280	433	R	0.63694	16	.REMLQTVKAHISFYD	45.36
1789	540	T	0.63854	20	.GASTRIPLFCMHEVKDQYN	45.41
949	317	E	0.64013	14	A.KREMSQHTGDLC	45.56
578	172	D	0.64172	16	E.KPDQAISRTLHVNG	46.01
1734	529	K	0.64331	20	AGKM.PHLSNTFDQYWEVIR	46.14
1136	373	R	0.6449	17	QMELRFYITVANHKSW.	46.19
1130	367	E	0.6465	16	MIKRTEQVASDHN.YG	46.27
280	88	A	0.64809	16	SRNATGY.PQMDEHKV	46.31
1518	466	H	0.64968	17	PEDNHRS.TQKYILAGF	46.35
194	63	F	0.65127	18	IRG.VFTAYEKSPMLQDN	46.52
1176	389	P	0.65287	19	TLGEAPSQHVNDFKRIM.Y	46.66
329	113	H	0.65446	18	QNASTHDE.PGFMKIRLY	46.67
106	32	K	0.65605	20	SNQK.RTGWEDHLYAFICVP	46.7
676	214	K	0.65764	17	NLEDKRTYH.QVIAGSM	46.72
675	213	A	0.65924	19	HIKAMQPDSR.ETGVLYFN	46.82
665	208	E	0.66083	21	KNESFWPM.AHVTDYLRIQCG	46.88
570	171	E	0.66242	17	.QRAEPHTSKLNYDFIG	46.93
203	72	C	0.66401	20	.QFDCSGENKRPTHLAMVIY	46.94
616	187	S	0.66561	17	.EKGQSHPTADFRNYLV	47.1
102	28	S	0.6672	17	DVGASYNQ.TPRHELIM	47.18
1877	552	L	0.66879	20	WPSTLDYEIVRH.AGNFQMK	47.23
1266	421	P	0.67038	18	PDFILVRHYMQEKTASN.	47.44
1912	580	I	0.67197	18	SPYIQR.ALHTNKFVGED	47.54
1276	429	R	0.67357	19	.REPTVAQSKDHNWLIMFY	47.65
1728	523	K	0.67516	19	TPA.KNDRQESHLFYVIMG	47.73
1154	385	P	0.67675	19	P.EGSNRKATDQFVWLYHM	47.79
126	33	A	0.67834	20	DLGTAIM.HSQNPYRKEVFW	47.98
919	292	K	0.67994	17	VQEKAIRWHM.YSTNGL	48.14
1177	390	D	0.68153	17	NASYDLMEHTRFKGQ.P	48.16
172	58	T	0.68312	16	.EKGTVPARDQSNYLM	48.25
1476	457	P	0.68471	19	DPIKAEQM.VSRGNTLYFH	48.3
248	78	D	0.68631	18	SKNYDCFHG.TAQRELPV	48.92
1104	349	E	0.6879	16	.DESATVYQLRNKIPH	48.96
959	321	G	0.68949	20	Q.NPGRKDAESYLVTMHFIW	49.11
1100	345	V	0.69108	19	S.EQVPYLMHARDKWINFT	49.12
2085	624	K	0.69268	21	FLYAQKSVR.PWGHINTDEMC	49.13
1407	450	D	0.69427	16	NRETDSG.AQKVIHLP	49.14
1180	393	K	0.69586	18	LEIDKQVARMSTHN.PYF	49.2
1951	593	E	0.69745	17	DS.PLEHQAKRNFVGTM	49.38
1270	424	P	0.69904	19	EPTAKRQDLVMSNYG.FIH	49.56
664	207	T	0.70064	19	AEPGRTSIV.LNQDKHFYM	49.68
1732	527	V	0.70223	20	DNAV.IHLYFRCTESPQKGM	49.85
1487	461	D	0.70382	18	A.KDLRHQENYTSMVIGP	50.06
558	166	A	0.70541	15	AHDKRSNTGEQMLPV	50.08
2146	627	C	0.70701	20	EP.RCGKDSLNTAMFIHQVY	50.09
1708	512	T	0.7086	20	VMIYTFS.EKGRANDPQLHW	50.09
1543	475	V	0.71019	17	VMNSRQTK.EHADPIGL	50.13
1608	491	W	0.71178	20	AGPLQWTIV.YKMRNFDSEH	50.25
1949	591	G	0.71338	19	SK.CGDNRLPMIAQEHTVY	50.53
580	174	V	0.71497	19	Q.GPDVSRELIHNTAYFKM	50.66
1138	375	K	0.71656	15	KEIVQGRTAMSLND.	50.68
313	102	P	0.71815	18	LQP.ERKGANVIHSTDYM	50.71
1735	530	I	0.71975	20	.SLIPTAGMQYHDWFKNVER	50.75
171	57	A	0.72134	17	RS.PAEKGFNTDQHYVI	50.79
562	169	G	0.72293	20	MCVNGAHQRWDFSE.ILKTP	50.79
1718	521	G	0.72452	18	RGS.ANDEVTKMFLQPHI	50.94
1592	486	E	0.72611	19	FKDELRQAYH.VTISPGNM	51.01
1642	501	L	0.72771	19	DSVA.LRQPTEKGNFHICY	51.02
1283	436	V	0.7293	18	DSPVQIAGENRHL.TKFY	51.04
1101	346	N	0.73089	18	S.GTKNVIADFRMEQHLY	51.22
1946	588	L	0.73248	20	FDERGLIVHY.STAQMKNCP	51.22
1196	396	S	0.73408	17	KNGDRSEAT.PHQYLVM	51.34
128	35	N	0.73567	17	FVYNK.SHDATIMLEQW	51.46
1730	525	S	0.73726	19	FSY.HANRVQELDPTIKMG	51.59
105	31	E	0.73885	19	SFE.DAVKHNLRQYITMGP	51.67
1616	497	F	0.74045	20	SHN.FPLQWTREGYAKDVMI	51.67
314	103	R	0.74204	18	KLDRG.SMVATNQPEIWY	51.82
1731	526	Y	0.74363	20	YF.GHSQEVTAIMLRKNWDP	51.9
1105	350	A	0.74522	16	.SAKNTIRLQHMFEVG	51.95
1571	476	P	0.74682	19	REAPLS.VTHNYIGKDFMQ	52.04
1677	510	E	0.74841	18	ADNFEVPKRQ.SLGTYIH	52.07
130	37	R	0.75	20	RQKP.ANSLTVIGDEWHMYC	52.21
279	87	L	0.75159	18	TGDRALEMNYKFS.QHIW	52.34
1319	447	R	0.75318	18	SLTQREHK.VIDNAFYPM	52.41
1174	387	S	0.75478	18	NHDVTSPRYQK.GMAELI	52.41
1997	604	M	0.75637	20	P.SYMFILWHTAVDKEGQNR	52.42
328	112	V	0.75796	18	DLIVKR.EQMAFYNPTSW	52.43
1729	524	Y	0.75955	18	TVG.YSDKEANHQRPLCF	52.52
1587	483	N	0.76115	18	VPSANTL.KDHERIGQMF	52.66
140	43	L	0.76274	17	.NFILVEYRAHDPQKST	52.72
262	82	A	0.76433	20	AVIDTS.CRNYFEPWKLMQG	52.78
1273	427	A	0.76592	17	KTQAGMEDVHNSLIRY.	53.04
557	165	S	0.76752	20	QPNTSKAGMRDE.YLVWFCI	53.35
934	302	S	0.76911	18	NRADSEPLHKYTMIV.QG	53.41
887	280	V	0.7707	20	.QDVIGSNPKEHAMLYFTRW	53.45
1970	599	K	0.77229	20	GTDKH.SQAENVWYILRMFP	53.45
1914	582	N	0.77389	18	RSAINPD.GKHFQEVLTY	53.53
953	320	D	0.77548	20	.RINDTEGALVSFKPMQHYW	53.56
1872	547	K	0.77707	19	QDPVNKIATES.YLRFMHW	53.83
1492	463	I	0.77866	19	HLYVTIK.RFQPENSADMG	53.92
1918	586	E	0.78025	19	SLQAEVRFDH.NTIKGPCM	53.97
1996	603	N	0.78185	18	TLSR.NKAIHPEDQGMFY	54.04
538	152	K	0.78344	19	SGNQKREHALDC.YTVFMI	54.24
938	306	H	0.78503	17	KREIQHTALSMYDNCVF	54.28
278	86	H	0.78662	18	NRDPHGY.SEKFATLQIV	54.33
2087	626	E	0.78822	19	RGCDSEPTIA.VKQNMLHY	54.74
1908	576	C	0.78981	20	KSLFACMYP.VTEHDGQRIN	55.21
100	26	V	0.7914	20	GASVDET.HLKFQNRIPYMC	55.4
2080	619	V	0.79299	19	AKLSRV.HETQDGIYFPNM	55.5
541	155	K	0.79459	16	DRVQKAHGTSE.ILMF	55.52
2074	613	P	0.79618	20	SMTGP.ADEKNRQHWYIVLF	55.55
1643	502	H	0.79777	19	STD.HVAFMQRKLEGIYPN	55.55
960	322	K	0.79936	16	R.EDLKQNSAPHGVTY	55.73
284	92	S	0.80096	17	SYGDE.KQNTRAFLHIV	55.78
853	276	G	0.80255	19	KG.VSTRDQENPMLIYAFH	55.86
191	60	L	0.80414	20	EVRKLAT.GNPQMHSYDWFI	56.91
1644	503	S	0.80573	18	SHNT.DGREKPLAVIQYF	56.93
1200	400	V	0.80732	20	IPEATVDRSM.FQNGLKHYW	57.55
1719	522	M	0.80892	20	VTQ.MEASDIRKLHPYGCFN	57.57
1524	472	Y	0.81051	20	KELRDYNPQ.HGSATMVCIF	57.63
2082	621	D	0.8121	18	ADGTLVMRHN.SEYIQKF	57.73
1910	578	C	0.81369	21	TVSRCKGPD.LQWIEYMFHNA	57.93
1874	549	K	0.81529	21	KQERLGWF.PYVCNHTDAMSI	58.11
2083	622	I	0.81688	17	AVIPSRG.FLQKTEMYN	58.15
276	84	Y	0.81847	19	NDMAYTLHRQV.FSKGIPE	58.4
1952	594	D	0.82006	19	GS.KLDVIRYHNAFMQTEP	58.56
1617	498	S	0.82166	19	MRIV.SNQHETAYFDKLPG	58.78
2147	628	K	0.82325	20	VP.EKADGRSQTINLMYFHC	59.05
2054	608	V	0.82484	18	LGYVIE.SADHQNRTFPK	59.08
1094	339	D	0.82643	17	A.ETDMKVSNIRHLFQY	59.24
169	55	Q	0.82803	18	TQANKLFIM.GVSEDRPY	59.35
103	29	R	0.82962	20	GTQARS.DENVLPFYKIWCH	59.42
98	24	A	0.83121	20	AWRFDL.SEPNQGYIVHTMK	59.46
1641	500	L	0.8328	20	PHD.LENTSFAKQMRYVGCI	59.51
2084	623	L	0.83439	19	VKPDLE.IMRNSTQCGAYH	59.79
1709	513	L	0.83599	17	EMARVLTDGSIF.QNKP	60.09
2058	612	K	0.83758	18	.TDKSHRAEQPYVFLIGN	60.09
1477	458	I	0.83917	19	GEFVNIYLDT.SRQMAHKC	60.67
1733	528	L	0.84076	19	VP.LTSAMIGNKQRHFDYE	61.68
855	278	R	0.84236	18	P.KSREITNDGAVFQLMH	62.26
160	46	K	0.84395	18	NVTQKSRFLH.YAMIPED	62.37
1913	581	L	0.84554	18	LPAQNC.EDVSTKHGRMI	62.39
1788	539	G	0.84713	20	.TVGIRSDAMLNQKEFPHYW	62.45
1674	507	E	0.84873	19	LKEPAQITRSH.FNVMGYD	62.69
1963	597	T	0.85032	20	.YERDTIAVPHFNKQSWGLM	62.73
254	79	K	0.85191	20	VY.NKELTIHQMRWFSDAPG	62.99
1906	574	R	0.8535	19	LSRQEYHPADTVIN.KMGF	63.75
99	25	G	0.8551	21	SAFGIHC.QEPDRYLVKWMNT	63.79
1873	548	I	0.85669	20	TLGEIVSFN.ADMPRKQYHW	64.54
2055	609	Q	0.85828	20	LDVKQERH.WGTPSANIFMY	64.98
1523	471	W	0.85987	19	LPDRWGK.ESAQHINYFVT	65.58
1712	516	A	0.86146	19	NRDTAMYQKS.VLWEHIFG	68.25
162	48	W	0.86306	20	TESKWVR.HYAMFGQDILPN	69.07
95	21	S	0.86465	21	FKSVLERP.QNTAHYGDMWCI	69.54
170	56	N	0.86624	18	PEDNST.QVRYHKGLAFI	73.02
96	22	G	0.86783	21	RLTGIAS.DFEKQPNYVHCWM	73.07
93	19	G	0.86943	21	WRLSGAV.NYTIQEMKFPDCH	73.88
94	20	L	0.87102	21	TEFSALY.WPQGCRVNDHMKI	74.49
97	23	V	0.87261	20	YVPIAL.FDESRNQKHTGMC	77.02
89	15	V	0.8742	21	LTFCV.MPWAHSREDIYGQKN	77.84
91	17	A	0.8758	20	YPFAT.WCISGQLVDKRHEN	79.28
88	14	T	0.87739	20	LDCTV.FIHMSQAERNPGYK	79.51
85	11	W	0.87898	21	WPKMFL.TREGAVIHNQDSCY	80.36
92	18	A	0.88057	21	LPVTAS.MFQYIREKNDHGCW	82.05
90	16	V	0.88217	20	FGLVT.KARDIQHPNYSCWM	82.91
86	12	G	0.88376	21	SCVLG.PAQFITRYMNEHWDK	84.87
68	1	M	1	16	.MSGALPWRCIEYDVT	87.27
69	2	G	1	15	.SGWMLEQTHPAFDY	87.27
70	3	S	1	18	.KSIFLMDVHTQPWGAEC	87.27
71	4	C	1	19	.YCLVREQMWFSGAHPNID	87.27
72	5	A	1	16	.WALIFTVYSGPHKRM	87.27
73	6	R	1	18	.FRTQPEALGKMSDCWYV	87.27
74	7	L	1	14	.LSFVRQIGAPDTC	87.27
75	8	L	1	17	.ILSTAVYFGCQMRHPK	87.27
76	9	L	1	18	.VLRFIKDSAQNEGPCMW	87.27
77	10	L	1	18	.LQGVFYMSHINCWRTAD	87.27
87	13	C	1	21	IAVLCY.FSGEMWTPQHRNDK	87.27
156	44	G	1	9	.GAYQLKMT	87.27
197	66	E	1	11	.GTSENDYHAP	87.27
198	67	N	1	9	.AFNTLPGE	87.27
199	68	T	1	12	.VDATNIQEKSG	87.27
200	69	D	1	12	.LGDREVQASIT	87.27
245	75	P	1	18	SY.AIPMRNVWCKQLGET	87.27
263	83	A	1	8	.GKARQTP	87.27
301	96	D	1	17	A.DSTKRGMEIYNVLHF	87.27
854	277	F	1	17	D.EFATIQMVLYHSNKP	87.27
891	284	G	1	16	.PGRATFSMKYQEIDN	87.27
892	285	T	1	15	.NTVESGYDKMFLQR	87.27
894	287	H	1	14	.HPEADTQSNGIVK	87.27
900	288	M	1	4	.MKI	87.27
918	291	G	1	7	.NGEDAS	87.27
961	323	T	1	10	.NTASDQEHK	87.27
962	324	G	1	2	.G	87.27
963	325	A	1	3	.EA	87.27
1213	404	V	1	11	NALVYPQ.DSH	87.27
1216	407	A	1	14	.PLAFETIMRVDHQ	87.27
1217	408	N	1	15	.DNLTEQHSIVPFMR	87.27
1227	412	F	1	14	.FYAKHQRELVPID	87.27
1228	413	C	1	12	.CTNPSDQEGAK	87.27
1229	414	D	1	8	.DINQPEG	87.27
1230	415	P	1	15	.PFELGSAIDQTNKR	87.27
1231	416	S	1	15	.SEGVATMRLQHYWF	87.27
1289	442	G	1	13	N.ALGQTSDRIEK	87.27
1290	443	D	1	15	A.ERDHYFSPTIQGL	87.27
1713	517	K	1	4	VL.K	87.27
1714	518	A	1	4	TE.A	87.27
1715	519	F	1	4	ET.F	87.27
1736	531	K	1	13	.GDKHTEAFSNYV	87.27
1743	533	L	1	13	.LKIRNYFMSVEQ	87.27
1744	534	S	1	11	.KISAGTMLVR	87.27
1791	542	V	1	10	.LVIDAQESN	87.27
1792	543	E	1	9	.EVGFSQCT	87.27
1879	554	S	1	16	.TGVSKREAPDQLNFI	87.27
1880	555	T	1	11	.VTLQNESGPD	87.27
1881	556	K	1	16	.HVLKFEADQNRTCIG	87.27
1883	558	K	1	15	.GKSEDTNMARQHYL	87.27
1884	559	I	1	4	.IQG	87.27
1885	560	F	1	4	.FGV	87.27
1886	561	R	1	4	.REF	87.27
1887	562	G	1	4	.GHL	87.27
1888	563	K	1	4	.KEA	87.27
1889	564	R	1	18	.REVSAYIFGLHNTDQMP	87.27
1890	565	T	1	8	.TEANSMD	87.27
1891	566	L	1	11	.GLITSQVDWA	87.27
1892	567	Y	1	14	.AYRVCEIGPKMLS	87.27
1895	570	S	1	17	.ESRQGTPAYVDIKNFL	87.27
1896	571	W	1	17	.ALWYFHSNTGQMRDPV	87.27
1904	573	D	1	6	.GDQNP	87.27
1915	583	P	1	11	S.NQPLTYAGD	87.27
1916	584	G	1	18	L.TWGQCSFARYIVENKD	87.27
1947	589	V	1	9	.FCVYIALT	87.27
1948	590	A	1	12	.QTADNGKSHPR	87.27
1999	606	S	1	15	.ISPARTGLQKDNFV	87.27
2056	610	H	1	7	.THPIMC	87.27
2057	611	W	1	6	.WFYSL	87.27
2076	615	L	1	16	LD.TISVMRKWENPAG	87.27
2077	616	G	1	10	PLI.GTSFAN	87.27
2078	617	R	1	11	SEK.RTDVQGN	87.27
2079	618	K	1	9	GKQ.ESRLT	87.27

## Sheet: NTN5
alignment#	residue#	AA type	coverage		variability	Score(rvET)
425	157	C	0.00818	1	C	1
427	159	C	0.00818	1	C	1
430	162	H	0.00818	1	H	1
434	166	C	0.00818	1	C	1
429	161	G	0.01227	2	NG	1.26
1171	429	Y	0.01227	2	EY	1.26
1209	455	W	0.01431	3	LWH	1.54
1163	421	L	0.01636	3	EPL	1.54
428	160	H	0.0184	3	NYH	1.55
510	175	C	0.03272	2	C.	1.71
513	177	C	0.03272	2	C.	1.71
517	181	T	0.03272	2	T.	1.71
519	183	G	0.03272	2	G.	1.71
522	186	C	0.03272	2	C.	1.71
525	189	C	0.03272	2	C.	1.71
547	209	C	0.03272	2	C.	1.71
533	197	P	0.03476	4	VPR.	2.22
531	195	D	0.03681	4	GDN.	2.49
632	212	C	0.05317	2	C.	2.7
634	214	C	0.05317	2	C.	2.7
722	239	C	0.05317	2	C.	2.7
725	242	C	0.05317	2	C.	2.7
731	248	G	0.05317	2	G.	2.7
734	251	C	0.05317	2	C.	2.7
737	254	C	0.05317	2	C.	2.7
756	272	C	0.05317	2	C.	2.7
824	296	C	0.05726	2	C.	2.77
836	308	C	0.05726	2	C.	2.77
821	294	C	0.0593	3	CI.	2.8
719	236	G	0.06339	2	.G	2.92
720	237	G	0.06339	2	.G	2.92
641	221	C	0.06953	3	SC.	2.96
706	223	F	0.06953	3	SF.	2.96
729	246	T	0.06953	3	YT.	2.96
1230	475	C	0.07157	3	A.C	3
402	146	A	0.07362	3	YFA	3.36
1162	420	C	0.07566	3	ITC	3.56
853	322	C	0.07771	3	CE.	3.57
796	275	C	0.08793	3	C.I	3.6
798	277	C	0.08793	3	C.R	3.6
802	281	G	0.08793	3	G.S	3.6
814	287	C	0.08793	3	C.Y	3.6
833	305	C	0.08793	3	C.K	3.6
745	261	D	0.08998	4	NDH.	3.63
528	192	S	0.09202	5	GLFS.	3.66
969	364	C	0.09407	3	TC.	3.79
714	231	S	0.09611	4	DTS.	3.8
827	299	G	0.09816	4	G.HA	3.83
825	297	K	0.10225	4	RK.M	3.86
828	300	V	0.10225	4	AV.K	3.86
819	292	G	0.10429	4	GS.E	3.86
410	154	R	0.10634	4	GSKR	3.95
1175	433	G	0.10838	7	KGLST.A	4.02
743	260	R	0.11043	6	GRQP.K	4.08
515	179	H	0.11247	3	DH.	4.09
534	198	W	0.11452	5	TIWP.	4.11
431	163	A	0.11656	3	SAG	4.19
953	349	C	0.11861	4	.CMT	4.21
839	311	G	0.12065	6	RGN.DS	4.36
426	158	Q	0.1227	5	SNFQK	4.4
740	257	G	0.12474	3	SG.	4.49
532	196	W	0.12679	7	KAQRW.V	4.62
637	217	H	0.12883	3	SH.	4.63
852	321	P	0.13088	5	SEKP.	4.73
538	202	T	0.13292	5	.NDTS	4.83
830	302	G	0.13497	6	GE.RAV	4.92
544	206	P	0.13701	5	APK.S	4.94
1160	418	C	0.13906	4	ITKC	4.97
1172	430	L	0.1411	4	IMLF	5
536	200	P	0.14315	6	.PAVRK	5.09
635	215	N	0.14519	5	PNHG.	5.16
840	312	Y	0.14724	4	HYF.	5.3
537	201	A	0.14928	3	.AG	5.31
184	61	C	0.15133	6	ICKLAS	5.41
250	100	G	0.15337	9	STQKRGAEL	5.61
1204	450	G	0.15542	5	NDSTG	5.8
411	155	G	0.15746	4	SAGD	5.84
707	224	N	0.15951	5	PDNS.	5.85
210	74	L	0.16155	8	YIVSALT.	5.86
110	33	V	0.1636	7	GC.RVLI	6
232	88	P	0.16564	7	EPHS.KD	6.15
1198	444	L	0.16769	6	LFVMIY	6.26
240	96	W	0.16973	7	YRLQW.N	6.35
815	288	N	0.17178	5	DNH.P	6.37
820	293	Q	0.17382	7	QIRDYK.	6.39
842	314	Q	0.17587	5	LVGQ.	6.39
1088	396	K	0.17791	6	TDALKR	6.41
403	147	G	0.17996	4	HASG	6.44
80	7	L	0.182	5	Y.FLP	6.56
735	252	H	0.18405	6	EQHD.N	6.57
1113	404	R	0.18609	9	REKNSQLDV	6.65
727	244	H	0.18814	5	LPVH.	6.67
412	156	R	0.19018	7	DSGTRHV	6.72
256	106	W	0.19223	7	VLEQW.F	6.81
721	238	V	0.19427	5	.VIMT	6.81
218	82	F	0.19632	9	PSG.FATLD	6.84
1220	466	L	0.19836	5	LFVIY	6.91
241	97	A	0.20041	8	GMLFAV.I	6.96
1206	452	A	0.20245	6	TVASIL	6.98
800	279	P	0.2045	4	PL.S	6.98
976	369	V	0.20654	6	LVAIGP	7.02
87	14	A	0.20859	5	F.AWS	7.03
211	75	L	0.21063	6	FYLDAV	7.03
718	235	S	0.21268	5	RTS.G	7.29
950	346	Q	0.21472	7	.VCQPDE	7.29
249	99	G	0.21677	9	ILADMYGTK	7.3
179	56	G	0.21881	9	K.DVETGAL	7.36
1083	391	V	0.22086	3	LIV	7.38
248	98	S	0.2229	6	RKTSQG	7.38
463	173	P	0.22495	6	GPNASD	7.41
803	282	A	0.22699	5	ST.AV	7.5
258	108	R	0.22904	8	RKESGV.Q	7.51
753	269	R	0.23108	9	GAPHE.RKQ	7.55
799	278	H	0.23313	7	NSDHQ.R	7.73
409	153	L	0.23517	6	AEQVIL	7.76
526	190	R	0.23722	8	TALRHSK.	7.77
1087	395	Y	0.23926	5	LIYWF	7.78
711	228	F	0.24131	5	LWYF.	7.78
234	90	L	0.24335	9	IGSLAKTDN	7.86
251	101	P	0.2454	7	DNAKHPS	7.87
527	191	P	0.24744	7	SPEAN.T	7.92
1217	463	L	0.24949	6	FAIVML	7.93
523	187	E	0.25153	7	DEQN.SG	7.99
1002	374	V	0.25358	7	DEIVYMF	8.08
1192	443	R	0.25562	10	SRK.EYGNAT	8.14
406	150	A	0.25767	7	KRNDTAE	8.14
529	193	H	0.25971	4	YFH.	8.15
432	164	A	0.26176	8	DSEGNKAF	8.2
252	102	W	0.2638	6	ILKVWS	8.21
1114	405	G	0.26585	9	AMGSQTPFK	8.21
238	94	A	0.26789	10	AQNTIVRPS.	8.27
848	317	S	0.26994	6	TSNY.L	8.28
732	249	R	0.27198	8	KQTRAVS.	8.3
214	78	V	0.27403	11	VLTAYKSPDQM	8.31
81	8	L	0.27607	6	W.KRCL	8.39
88	15	T	0.27812	8	Q.MTGAVL	8.43
1215	461	R	0.28016	8	RKSLEDQM	8.45
545	207	H	0.28221	6	SNKAH.	8.52
546	208	P	0.28425	10	DQMEVSP.HA	8.53
77	4	T	0.2863	6	E.VITS	8.54
407	151	A	0.28834	6	LVFITA	8.54
742	259	W	0.29039	7	YHT.WFV	8.61
521	185	G	0.29243	8	HRDNTGE.	8.62
408	152	G	0.29448	9	PISRTAGQL	8.64
1149	416	L	0.29652	8	L.AQNITV	8.65
1165	423	L	0.29857	5	LMFIV	8.7
834	306	N	0.30061	5	DEGN.	8.76
962	358	M	0.30266	6	L.VIFM	8.76
1078	386	R	0.3047	7	EQVARSK	8.81
739	256	P	0.30675	8	SPKAIE.H	8.85
1210	456	R	0.30879	10	EDAKQRVLNS	8.87
95	22	P	0.31084	7	Y.DGPER	8.89
1143	410	W	0.31288	7	FLWQVIY	8.9
832	304	T	0.31493	9	RLHS.TANK	8.92
1142	409	A	0.31697	9	ISMLVAWYF	9.01
97	24	G	0.31902	6	G.ANER	9.02
841	313	Q	0.32106	10	IVYWQ.KHDT	9.03
741	258	F	0.32311	3	YF.	9.06
239	95	A	0.32515	10	SDENRATK.L	9.06
642	222	R	0.3272	9	FYHREKMI.	9.14
847	316	R	0.32924	8	ERDGK.AH	9.14
236	92	L	0.33129	12	IEHKQVSAGLTN	9.17
405	149	A	0.33333	7	GSYAVNT	9.2
275	116	G	0.33538	10	.FPGMNEDQS	9.26
237	93	S	0.33742	12	KAVYSLNGDPFM	9.27
516	180	H	0.33947	6	NHSGK.	9.34
1222	468	Q	0.34151	9	Q.ERKNAVM	9.36
82	9	L	0.34356	8	R.NTSGLW	9.46
1221	467	Q	0.3456	12	HFLSEAVRYQTM	9.48
752	268	S	0.34765	6	.AHSND	9.49
171	53	N	0.34969	11	RGSNQPAVDK.	9.5
850	319	R	0.35174	8	CI.DLTRV	9.54
801	280	I	0.35378	7	HSTVLI.	9.59
977	370	L	0.35583	5	LIFVN	9.59
967	362	R	0.35787	10	NSDL.AKERQ	9.61
75	2	P	0.35992	8	RQ.YHFPI	9.63
1086	394	V	0.36196	6	KEVITS	9.63
74	1	M	0.36401	6	IV.TSM	9.69
843	315	S	0.36605	7	MLVFT.S	9.71
209	73	F	0.3681	9	KVSQIFLM.	9.76
1174	432	L	0.37014	9	EKATILFVM	9.8
208	72	P	0.37219	12	WEPRMVASKG.L	9.84
273	114	A	0.37423	9	.TIAEVMQR	9.89
85	12	G	0.37628	8	QE.PSGLA	9.91
1079	387	L	0.37832	8	EHQVFYLI	9.92
854	323	Q	0.38037	8	DTNVIQ.A	9.93
835	307	R	0.38241	7	EQDMR.Y	9.95
818	291	S	0.38446	5	STN.D	9.97
216	80	L	0.3865	11	E.VNGLATQDS	9.99
185	62	N	0.38855	11	YTSVRNEFDLA	10
107	30	L	0.39059	7	SA.TLDG	10
816	289	Q	0.39264	10	REMPQ.HNSK	10.04
1000	372	A	0.39468	10	QAIVGMLPTC	10.04
757	273	R	0.39673	7	QRKIL.M	10.09
1228	473	G	0.39877	9	L.GKENSTD	10.1
401	145	Q	0.40082	9	GYHFQKVST	10.15
1148	415	D	0.40286	11	D.YHNLEVSRG	10.25
716	233	G	0.40491	8	DYGNKR.Q	10.26
1166	424	Q	0.40695	7	QKNREHL	10.31
92	19	C	0.409	7	L.RKCDG	10.32
178	55	L	0.41104	9	R.VEQPLIH	10.39
253	103	R	0.41309	12	SRKHQ.DIVGMW	10.43
736	253	Y	0.41513	9	RLKQVEH.Y	10.47
274	115	L	0.41718	11	.NWLYGQAPDF	10.48
153	37	A	0.41922	7	SF.MVAY	10.52
259	109	P	0.42127	14	KSRQPTFYLD.MVH	10.52
710	227	L	0.42331	6	VILA.M	10.54
713	230	L	0.42536	11	GSADVMKRL.I	10.55
86	13	Q	0.4274	7	Q.AFDET	10.55
213	77	S	0.42945	9	SVAFTPWDM	10.57
829	301	T	0.43149	8	STAG.VIK	10.59
1213	459	W	0.43354	10	QWRVTLFYDI	10.6
851	320	M	0.43558	10	VRQHTSANM.	10.6
810	284	G	0.43763	11	HSGQKY.AVID	10.62
512	176	H	0.43967	10	NVMDIARH.E	10.63
639	219	R	0.44172	10	PDEKNLS.RH	10.64
638	218	A	0.44376	8	PYHLAST.	10.71
90	17	D	0.44581	7	D.ILWFV	10.71
404	148	L	0.44785	7	RVILFMA	10.71
84	11	L	0.4499	9	PS.RVLIKH	10.72
728	245	H	0.45194	9	GHN.DYFSA	10.73
975	368	H	0.45399	7	SAYF.MH	10.89
535	199	R	0.45603	9	GRKESQAD.	10.89
105	28	F	0.45808	6	F.YTLV	10.91
884	324	R	0.46012	9	.HGDPKREI	10.92
518	182	T	0.46217	9	ATDVES.MF	10.93
738	255	Q	0.46421	10	SERKNIA.QM	10.96
1201	447	D	0.46626	8	MDNESTGA	10.96
1076	384	W	0.4683	14	VQHNMYLKWRIETA	10.97
99	26	P	0.47035	6	L.TEPS	10.97
712	229	R	0.47239	9	EDRLIK.TN	11.04
224	87	P	0.47444	10	FDNS.QRPTL	11.04
203	67	L	0.47648	12	MPND.LSGTAQV	11.04
106	29	C	0.47853	8	Y.FMCDEV	11.05
386	143	G	0.48057	12	SMF.ITGQRVHA	11.1
221	84	T	0.48262	12	RGSDNQ.TEAKP	11.11
1208	454	P	0.48466	9	LHERPKSGQ	11.11
212	76	T	0.48671	11	NRKAGSTQPDV	11.13
219	83	C	0.48875	12	VTNPD.SACLKQ	11.15
974	367	D	0.4908	8	EKD.SATQ	11.16
530	194	R	0.49284	13	YFNVQLMRK.ASC	11.17
1161	419	G	0.49489	9	AFLTKGVQR	11.19
895	335	T	0.49693	11	NDKQ.ATESIP	11.21
1216	462	P	0.49898	9	DHQREKNPM	11.25
548	210	L	0.50102	10	ASKERTLI.V	11.26
1081	389	V	0.50307	8	DEGVMIYL	11.3
217	81	R	0.50511	12	KE.GNRAPQDLS	11.31
715	232	G	0.50716	9	HGANS.QEL	11.4
93	20	Y	0.5092	8	ML.SYERQ	11.43
826	298	L	0.51125	10	LPKNT.QEDG	11.43
1207	453	L	0.51329	7	SAIKQLV	11.46
76	3	V	0.51534	6	A.LVIQ	11.49
952	348	Y	0.51738	10	.GHKNPTYRD	11.49
1229	474	G	0.51943	11	K.LTRSAGQIE	11.51
748	264	Q	0.52147	9	TMAKRHL.Q	11.51
1190	441	P	0.52352	12	PTNS.RLHKGAQ	11.52
968	363	Y	0.52556	6	TRL.FY	11.53
838	310	P	0.52761	10	PVMK.DERSL	11.57
1144	411	V	0.52965	10	KNDTIQVLMA	11.57
797	276	Q	0.5317	11	DRES.QNGKAP	11.57
730	247	A	0.53374	10	ETMDSVIA.H	11.58
1173	431	L	0.53579	5	MLIVF	11.61
1015	382	P	0.53783	8	EGPSDKTA	11.77
724	241	R	0.53988	8	ASDNK.RQ	11.81
837	309	G	0.54192	12	ELRMQ.GVASHK	11.82
749	265	P	0.54397	10	PLEDST.QVA	11.83
514	178	R	0.54601	7	GSQRKE.	11.88
1139	407	Q	0.54806	12	TYWFIVQMDESL	11.91
1111	402	V	0.5501	12	VLIMSRPHF.QA	11.93
1223	469	E	0.55215	10	N.KRTLESQH	11.95
89	16	A	0.55419	7	G.VISAT	11.97
207	71	G	0.55624	12	FGSTRNKWAI.P	11.98
1225	471	R	0.55828	12	T.VHREANSKGD	12.08
896	336	P	0.56033	12	DNEKA.TPSGRQ	12.08
255	105	L	0.56237	12	EKRQLTSV.IMA	12.14
1092	398	R	0.56442	10	ATR.DSKNGE	12.16
1005	377	S	0.56646	11	KNRAEQYSH.I	12.2
83	10	L	0.56851	8	L.APRMST	12.22
1167	425	P	0.57055	6	MTVPLI	12.22
894	334	T	0.5726	11	LKHNDGA.STQ	12.26
78	5	F	0.57464	7	P.MVLFI	12.28
387	144	G	0.57669	14	CDATMY.EGSQHFL	12.3
751	267	F	0.57873	10	.TASDFGNME	12.32
966	361	R	0.58078	9	E.KRQANVS	12.35
973	366	Q	0.58282	9	QRFY.KNME	12.38
1003	375	L	0.58487	9	LKQIESTVG	12.43
433	165	R	0.58691	9	TAEVQRMSK	12.44
849	318	P	0.58896	10	DSGP.KHTQL	12.46
831	303	L	0.591	9	LPTR.QIVN	12.52
822	295	T	0.59305	12	VIFKPLTHRS.Q	12.58
539	203	P	0.59509	13	.GVKNSRTAPDEM	12.59
154	38	A	0.59714	10	NGH.RAPIDQ	12.61
233	89	A	0.59918	13	YAV.WHTGKNDES	12.63
961	357	H	0.60123	10	IVQT.ARSHK	12.64
104	27	Q	0.60327	11	A.SKQHMREPG	12.7
726	243	R	0.60532	9	LAVFKQRE.	12.71
733	250	H	0.60736	7	HYNRS.F	12.73
1168	426	G	0.60941	9	SDNGKHRML	12.82
633	213	S	0.61145	11	ATEKRNQD.SI	12.83
169	51	P	0.6135	12	GSPKETRLAV.D	12.84
1001	373	Q	0.61554	12	KTDISQRVFNAH	12.85
376	133	V	0.61759	13	CI.KTSVAGLRND	12.85
755	271	A	0.61963	8	SRTAIVY.	12.87
1219	465	R	0.62168	9	QHPERDGKS	12.96
1200	446	L	0.62372	8	NSDIVLFA	13.01
384	141	E	0.62577	13	GSYQHKV.FEAPT	13.01
172	54	H	0.62781	13	ITASQRLHEKG.P	13.06
79	6	A	0.62986	12	F.VMKSAQHYRE	13.07
1164	422	R	0.6319	10	RKLIVSNEYH	13.11
723	240	E	0.63395	11	DNVQLE.YITM	13.15
151	35	Q	0.63599	13	GAER.SQLFKNIV	13.17
379	136	S	0.63804	11	PMVLS.DETAI	13.18
640	220	R	0.64008	9	ASTKQE.RH	13.21
235	91	I	0.64213	13	LMAPDNSEVIFTQ	13.22
448	170	A	0.64417	12	.SDHEPNGAVIL	13.24
809	283	T	0.64622	12	V.SNHITLMAYP	13.24
812	286	T	0.64826	11	DRTF.QEHMSI	13.25
1170	428	D	0.65031	10	TQEDASKRNH	13.25
1014	381	G	0.65235	13	LKHREGIAVTPSN	13.27
165	47	C	0.6544	15	VDERASC.IQTPGML	13.27
965	360	L	0.65644	11	LIP.ASVFQTM	13.29
964	359	S	0.65849	8	ND.KRPST	13.29
1080	388	A	0.66053	15	TNSWEIGARQKMPDH	13.33
750	266	I	0.66258	8	.FKMLVIP	13.37
958	354	T	0.66462	10	.QEKDRSTGN	13.48
180	57	A	0.66667	11	QH.ASVPLKNG	13.5
1205	451	L	0.66871	9	GLIVYFNTA	13.51
1089	397	Q	0.67076	11	RSTIPNVLQKH	13.55
205	69	L	0.6728	12	ESTVNL.DAGQI	13.58
156	39	V	0.67485	12	EA.QPVDNLGHS	13.59
970	365	Q	0.67689	7	KQD.GRM	13.62
957	353	D	0.67894	13	.ERHNKVDSPTLQ	13.68
717	234	R	0.68098	9	FLVKRQIT.	13.7
754	270	R	0.68303	12	GSNQDEHK.RMT	13.71
1211	457	P	0.68507	13	IAVRQPKDESHNG	13.73
1224	470	E	0.68712	11	A.KVEDRGNQH	13.76
215	79	S	0.68916	13	SLPTN.IFDAEVK	13.81
382	139	R	0.69121	13	TKEV.HIRSLNAQ	13.82
167	49	L	0.69325	11	IVLKR.QDNMT	13.9
1186	439	P	0.6953	13	DWESGHKYPANRT	13.93
893	333	A	0.69734	13	LRIMVTP.GAQHS	13.96
109	32	P	0.69939	12	DN.VPFHEQSCL	13.96
1218	464	K	0.70143	8	TLMKSNIR	13.98
918	345	C	0.70348	13	GYTSP.CAKQDVN	13.99
709	226	E	0.70552	12	CKNHATGDSQ.E	14.01
1202	448	R	0.70757	12	QEMRTPKAGNHY	14.12
817	290	T	0.70961	11	TEGAVSKR.LP	14.14
260	110	A	0.71166	11	AQESPHDG.TN	14.21
1227	472	A	0.7137	11	E.QKRGALSTD	14.32
747	263	S	0.71575	8	QRTSNG.A	14.33
108	31	P	0.71779	12	LSNRTIAKD.PE	14.41
223	86	G	0.71984	14	DFSEA.MTGVNLQY	14.42
435	167	A	0.72188	12	DVILQREAMFSG	14.43
257	107	H	0.72393	12	GLREMTHA.NSY	14.45
152	36	L	0.72597	10	TQS.AMLDIV	14.45
1004	376	A	0.72802	9	GAVSDYKRE	14.49
886	326	P	0.73006	10	.VIAPMFTSK	14.49
1082	390	R	0.73211	11	NDQKRGHIVAS	14.49
385	142	F	0.73415	16	FLKHRIA.QESVMGPD	14.52
186	63	G	0.7362	11	MVSEPAHGKDN	14.61
1184	437	G	0.73824	14	D.ERPTVGASKLNH	14.73
610	211	P	0.74029	11	LPQKTRVAMIE	14.78
954	350	N	0.74233	11	.DKEVNCSRPA	14.82
91	18	P	0.74438	10	Q.EDYPSAFL	14.84
375	132	T	0.74642	11	NKE.GLRTYSV	14.85
157	40	A	0.74847	12	PE.TAGIYHSNK	14.87
1084	392	L	0.75051	14	QLKRNHTEFYIVMG	14.97
312	129	P	0.75256	13	VQPLDIFTKSMA.	15
956	352	S	0.7546	15	.PLKNSHMAVGRTDE	15.06
383	140	V	0.75665	12	VALP.HFSITGQ	15.14
1147	414	A	0.75869	12	QV.TKNARHLGS	15.21
1012	379	A	0.76074	12	ISDVHKYETRAQ	15.31
1140	408	D	0.76278	15	EPRDIMSYLTFVAGN	15.34
708	225	S	0.76483	15	TSLVIMPEDQN.AKR	15.39
277	118	P	0.76687	11	EQG.NDPAKSR	15.39
1212	458	R	0.76892	13	MILNASYTQRKED	15.62
1085	393	A	0.77096	11	KARYDNEQTSF	15.66
524	188	S	0.77301	11	VTQRHKMYS.L	15.72
310	127	P	0.77505	12	ETRPS.QYLAVD	15.76
543	205	H	0.7771	11	SLEKAQNDH.G	15.77
378	135	A	0.77914	13	CSEDRNT.GALVP	15.8
1112	403	R	0.78119	12	NTEFLSRIKGQA	15.81
437	169	R	0.78323	13	PLIVANR.TFHQK	15.85
746	262	P	0.78528	12	PSL.WKATQMRE	15.9
164	46	A	0.78732	13	QDRESNTA.GMFK	15.91
917	344	Q	0.78937	12	YHGR.QPASDKT	16.02
94	21	D	0.79141	10	A.DSQTEHVM	16.12
1110	401	P	0.79346	13	KQNESIRPLG.MT	16.12
98	25	R	0.7955	9	KR.QHDENL	16.13
462	172	P	0.79755	14	TPGEDANSKM.QHR	16.17
1120	406	D	0.79959	13	.AEKHTRPGDNSL	16.26
381	138	L	0.80164	13	GYEATS.QRKDLH	16.29
1199	445	I	0.80368	13	QLIVKMRTAGSEH	16.44
1169	427	T	0.80573	11	IVHELTMKQAR	16.45
811	285	G	0.80777	11	GSNKMVP.RQE	16.45
540	204	R	0.80982	11	.LRKNAEQTSH	16.45
380	137	H	0.81186	14	PEQNTLS.YHKDAG	16.46
885	325	I	0.81391	13	.EGQVSADILKTN	16.49
201	65	L	0.81595	13	VIPAL.RMKNTGS	16.55
1146	413	R	0.818	17	SIHREKLDGPTVAFMQN	16.58
1231	476	R	0.82004	16	A.LTKVEDNRSPGYQH	16.63
951	347	N	0.82209	13	.DGEQAPTNSLRK	16.63
313	130	K	0.82413	11	ATRIEGPKVSQ	16.64
889	329	T	0.82618	17	C.FLHTAIGPQVSKMND	16.7
1145	412	P	0.82822	10	EAKDNHPRQS	16.71
96	23	Q	0.83027	9	G.FYDNQRH	16.78
187	64	S	0.83231	14	DRKILSQVTA.PEH	16.83
520	184	P	0.83436	13	DEVSTLKAIP.RN	16.92
168	50	S	0.8364	12	KRDNVGLTIS.A	16.96
891	331	T	0.83845	15	GRHQI.FYTMSPNVA	16.97
887	327	E	0.84049	12	D.PSEAVTKRIM	17.07
183	60	T	0.84254	9	VILPTQASR	17.07
913	340	S	0.84458	14	IRS.GPATYVQKNE	17.1
170	52	G	0.84663	12	GDEKLAT.VHSQ	17.14
636	216	Q	0.84867	11	HYRGSKNL.QM	17.18
278	119	E	0.85072	14	KE.SNYLIDHATPQ	17.21
1187	440	D	0.85276	15	FLVDESNIAHTGPQK	17.22
1214	460	A	0.85481	15	IRKGTEDASLMHNYQ	17.31
111	34	T	0.85685	14	VITSYL.DHGQRKN	17.33
955	351	M	0.8589	15	.CNKRPTIVMSAFDG	17.34
911	338	A	0.86094	10	GSQ.TADPRE	17.45
890	330	T	0.86299	15	VT.DKIANGQEPSMR	17.46
279	120	R	0.86503	15	LS.HNKRAPQDGITE	17.55
311	128	G	0.86708	16	EVCYGDHRTLAKSMQ.	17.83
1013	380	A	0.86912	13	KEQDVIALRSMHT	17.86
1185	438	D	0.87117	11	EDN.RYHTSGK	17.87
206	70	G	0.87321	13	NSRGELDAQP.TV	17.9
1203	449	H	0.87526	9	QRKETNHSG	17.9
892	332	L	0.8773	15	VNPSG.TRLIYMQFD	17.92
1159	417	T	0.87935	12	ATMIGKRQENDL	17.92
166	48	A	0.88139	14	LDGSEQHKA.TIVP	17.97
254	104	L	0.88344	12	MLIVASP.NQTG	18.08
916	343	P	0.88548	13	PVQLR.SKNGDAE	18.28
999	371	R	0.88753	12	MAPTRKNLEQHY	18.29
204	68	A	0.88957	15	RKTCL.YDAFVMGIP	18.39
1191	442	T	0.89162	13	NSG.RMATPDQEK	18.56
795	274	A	0.89366	9	KRPALM.ES	18.67
1094	400	Q	0.89571	16	TSDNKQ.EWMLRHPIA	18.88
888	328	A	0.89775	14	ED.AVLHKNFTMPR	18.89
1077	385	Q	0.8998	12	ASVKMTWQFYEI	18.98
1176	434	S	0.90184	14	.AKFHQRDSGMNIT	19.08
915	342	D	0.90389	13	VLS.EPIDAHNGT	19.26
308	125	S	0.90593	16	PACG.EMSNKIHQDYV	19.28
1016	383	A	0.90798	12	GDSQTEKNARL.	19.42
309	126	T	0.91002	12	EGI.FVTPASLD	19.43
377	134	A	0.91207	15	VLNEHAMR.PTQDSI	19.46
464	174	R	0.91411	14	KNQTAVSERPHDLI	19.48
202	66	T	0.91616	15	AEGQDFIK.RTYSNP	19.91
461	171	R	0.9182	14	NEQPVATKISRG.H	20.16
307	124	H	0.92025	14	HRSFTPD.GEVANI	20.56
910	337	G	0.92229	14	TSRQ.NHVGDAKYP	20.61
1093	399	A	0.92434	15	SRHGKT.LAPIEDVQ	20.97
914	341	S	0.92638	15	PSLA.DHTRKIEGQN	21.73
222	85	P	0.92843	17	ESRIATMVF.PDQLKHY	23.37
158	41	A	1	6	.MVSAR	23.83
159	42	S	1	6	.DLPSA	23.83
161	43	C	1	6	.NVACM	23.83
162	44	P	1	8	.HLEDSPG	23.83
163	45	Q	1	4	.YHQ	23.83
181	58	R	1	3	.SR	23.83
182	59	E	1	3	.LE	23.83
270	111	W	1	3	.WF	23.83
271	112	P	1	3	.PD	23.83
272	113	G	1	3	.GS	23.83
276	117	G	1	4	.LVG	23.83
280	121	V	1	9	.LVTSIFDA	23.83
281	122	T	1	8	.TNQLDSA	23.83
282	123	F	1	3	.FQ	23.83
374	131	A	1	12	E.QALTPVSNGD	23.83
436	168	A	1	6	.PKTAV	23.83
912	339	Y	1	17	IVTFY.EPSADHGKMLQ	23.83
959	355	R	1	5	.SRAK	23.83
960	356	V	1	5	.IVYL	23.83
1011	378	E	1	4	.KED	23.83
1177	435	A	1	10	TAM.LHSPFI	23.83
1178	436	V	1	10	TN.HKYEAVG	23.83
1232	477	G	1	10	E.KGSLRATN	23.83
1233	478	V	1	13	D.WQENFLVRISA	23.83
1234	479	R	1	9	L.KTVREDA	23.83
1235	480	A	1	9	L.ENDPASR	23.83
1236	481	P	1	7	S.KRPHI	23.83
1237	482	T	1	5	.RAVT	23.83
1238	483	P	1	8	.RFVNKPY	23.83
1239	484	S	1	7	.YPVTLS	23.83
1240	485	P	1	8	.YKDGLNP	23.83
1241	486	R	1	7	.RVDSHG	23.83
1242	487	P	1	6	.RDSVP	23.83
1243	488	E	1	9	.QINMFDRE	23.83
1244	489	H	1	8	.KNTQRVH	23.83

## Sheet: NTNG1
alignment#	residue#	AA type	coverage		variability	Score(rvET)
975	315	C	0.00557	1	C	1
978	317	C	0.00557	1	C	1
991	326	C	0.00557	1	C	1
988	323	G	0.00742	2	GR	1.54
1219	387	C	0.00928	4	CQA.	2.41
587	157	P	0.01113	3	PSA	2.57
1112	366	C	0.01299	4	CSA.	2.67
994	329	C	0.01484	2	CV	2.81
669	206	C	0.0167	4	IT.C	3.59
1020	354	C	0.01855	4	CVM.	3.86
628	182	C	0.02041	6	KPAG.C	3.89
1216	384	C	0.02226	6	CDLAS.	3.94
1109	364	C	0.02412	6	CKSRM.	4.05
1282	417	C	0.02597	5	CGL.A	4.23
910	306	C	0.02783	6	ASECVT	4.28
1128	373	C	0.02968	7	CDAI.EV	4.4
1238	399	C	0.03154	5	CGF.V	4.43
1214	382	V	0.0334	8	GVTMNSA.	4.43
906	302	H	0.03525	6	DATHQL	4.56
903	299	C	0.03711	6	Y.CGSW	4.59
1230	396	C	0.03896	6	CWLA.V	5.21
1226	393	G	0.04082	4	G.KD	5.23
901	297	C	0.04267	8	ARCKYVLM	5.27
905	301	L	0.04453	7	AGPLRQN	5.78
986	321	T	0.04638	6	YLVTSA	5.85
1224	391	T	0.04824	8	TSILR.FA	6.93
1213	381	T	0.05009	12	TS.YVGRMIKHE	7.31
878	286	Y	0.05195	6	YSFTV.	7.48
1328	420	C	0.0538	6	CG.LPI	8.31
1332	422	C	0.05566	5	CTR.P	8.35
982	319	H	0.05751	12	QESPTKHDALGR	8.45
899	295	G	0.05937	6	A.GSTL	8.98
600	165	S	0.06122	8	IRPLSVEK	9.11
1003	338	W	0.06308	8	SP.LYWFH	9.54
1415	452	C	0.06494	7	C.PAISL	9.66
1483	465	N	0.06679	8	CNAS.LHT	9.76
1402	440	C	0.06865	6	CTL.SG	9.82
707	228	R	0.0705	14	.IKTRNQSEGAPHL	9.89
423	118	W	0.07236	7	WGYF.KL	10.26
1394	436	G	0.07421	7	GD.AVSE	10.31
907	303	A	0.07607	6	SQGPVA	10.43
1560	488	C	0.07792	10	CY.STIPLWF	10.45
1412	449	C	0.07978	8	C.RSIMNK	10.59
743	260	T	0.08163	11	EFSNTDKR.QV	10.87
1130	375	Y	0.08349	8	PTF.YLNR	10.96
708	229	F	0.08534	13	.PETVFLRYNQSG	10.98
1365	432	C	0.0872	10	CIANVLS.KY	11.4
597	162	L	0.08905	6	GILFVM	11.48
1557	486	C	0.09091	11	CTS.NVGHLEA	11.63
1399	438	C	0.09276	8	CTRAI.SF	11.66
997	332	N	0.09462	8	GLNMAFSP	11.67
1457	462	C	0.09647	8	CDS.ILFV	11.75
425	120	S	0.09833	12	RAGVSWT.CKFQ	12.1
586	156	R	0.10019	12	ALRPQVTMKEIH	12.38
1000	335	G	0.10204	8	RQGNTDA.	12.38
351	92	C	0.1039	12	CVAGDTF.SLIN	12.86
619	179	A	0.10575	10	M.KSTANDVG	12.99
1409	446	G	0.10761	9	G.ESAPVNR	13.12
599	164	K	0.10946	7	KQRLYAH	13.21
618	178	Y	0.11132	8	T.FYVMLH	13.64
900	296	R	0.11317	16	V.RTAYGFHSNEQMKI	14.13
344	88	C	0.11503	15	CSETNDQAVLKHI.P	14.14
611	172	W	0.11688	6	ILGFYW	14.3
1451	461	G	0.11874	14	YGAET.KPSFIHWL	14.59
598	163	E	0.12059	11	NEDSQLFMKYH	14.68
615	175	Y	0.12245	8	ILHVYWMF	14.7
1489	467	C	0.1243	11	C.NGASIKDRM	14.83
258	80	C	0.12616	11	CAESYRFQP.G	14.83
746	263	R	0.12801	9	MNRTQK.LW	14.88
632	186	F	0.12987	7	YRSF.TW	15.07
571	152	F	0.13173	9	LSYFAM.TP	15.22
616	176	Q	0.13358	14	SRDAQGLHKMFYIV	15.27
380	101	H	0.13544	15	KEQCHPSFNV.RYAL	15.29
749	266	L	0.13729	5	LFMI.	15.29
840	284	Y	0.13915	14	.YFSLWDATMHGVI	15.35
896	293	V	0.141	5	MLIVS	15.69
879	287	A	0.14286	10	FT.GYSAVDR	15.84
225	72	C	0.14471	9	RAC.HMSTL	15.93
734	253	L	0.14657	12	VWFSLKARIM.Y	16.15
740	257	F	0.14842	11	ILTVMFSQYG.	16.26
608	169	G	0.15028	7	GKNSADT	16.27
1586	500	L	0.15213	13	CILHPNRTES.AG	16.35
1115	369	H	0.15399	11	HVRAKF.NLYS	16.39
479	138	W	0.15584	11	YWM.HFSLAIV	16.45
1577	494	G	0.1577	11	GNTRYHQ.ASM	16.71
424	119	Q	0.15955	13	YTQKLIVR.MSAH	16.71
659	201	V	0.16141	14	.LRVAPDSEYNQIK	16.72
564	147	N	0.16327	12	G.DQNFYTEHSR	16.77
739	256	F	0.16512	12	.RTPFHYLWQVM	16.84
1249	405	R	0.16698	14	GNRTKEIHQM.PLA	16.95
983	320	N	0.16883	9	NGHSEFDYK	17.18
1006	341	G	0.17069	6	G.ASTN	17.49
590	160	M	0.17254	8	YWFMIALV	17.55
759	273	E	0.1744	15	.GEDMLPSQKAVRIT	17.71
1642	511	D	0.17625	12	CRADFY.GLKSQ	17.74
696	218	S	0.17811	13	SQAGDELTWNKP.	17.81
996	331	K	0.17996	11	KPTRDAEYQSV	17.84
559	142	I	0.18182	9	LGYIVFQM.	17.85
877	285	F	0.18367	10	ETFSNYWHQV	18.04
1223	390	N	0.18553	10	NSFHQD.YRA	18.19
226	73	G	0.18738	9	GRSQ.PTNE	18.3
606	167	D	0.18924	15	SNADKE.GCRHTYQW	18.49
904	300	N	0.19109	8	F.DENYHS	18.51
573	154	S	0.19295	14	DEPWYSAGRNTI.H	18.53
561	144	L	0.19481	10	TNIHLFVP.K	18.59
751	268	R	0.19666	13	NRKDGAYQT.ESL	18.6
752	269	P	0.19852	14	LFIYPHQM.SRVAT	18.72
422	117	F	0.20037	11	TSYGFLW.QNC	18.73
889	290	D	0.20223	10	LDENRHQKAG	18.73
897	294	R	0.20408	18	DNELRIHTASVYMFGKWQ	18.76
562	145	T	0.20594	19	QLVATMPKFISEDRH.GYN	18.78
477	136	L	0.20779	9	NIR.VFLMK	19.16
560	143	E	0.20965	13	TEDVNIKQHYLR.	19.17
614	174	P	0.2115	10	TKSVPADRIE	19.31
706	227	D	0.21336	18	.LMVDFSPARKEQWGNHY	19.62
697	219	K	0.21521	15	ETIQKVASNHR.DPL	19.71
1583	497	C	0.21707	16	C.HNAKFDGLSPIQEV	19.83
1212	380	N	0.21892	12	IV.GNDATRSHY	19.88
1511	480	C	0.22078	15	C.LPTSNKRAHYGEQ	20.01
1236	397	E	0.22263	11	EDGSQHAFRN.	20.03
224	71	T	0.22449	15	FSRQTGL.PEMNIVA	20.14
686	214	Y	0.22635	17	SRDAPYGHQINVFT.EL	20.16
758	272	G	0.2282	18	.CPGSYLFIDNQEHVRAM	20.16
428	123	W	0.23006	13	VFW.ILSMKNRYT	20.32
1418	455	G	0.23191	12	G.STMQNHKVDA	20.49
731	250	T	0.23377	12	LS.NRTADQKGH	20.55
1339	426	G	0.23562	16	M.GSRHYKFLAVINDT	20.55
744	261	D	0.23748	13	QDHNGREKFY.TA	20.79
197	50	C	0.23933	13	CIVLTSE.FKQPW	20.89
517	140	K	0.24119	16	SQ.RAKYDNLHGPTVE	20.99
399	108	D	0.24304	14	QD.SFTAVRKIEGL	21
890	291	I	0.2449	7	MVEILFW	21.02
805	275	F	0.24675	17	.PFYRHSTEDKLGWVAN	21.04
1251	406	N	0.24861	13	D.VNREPLQAHST	21.44
1406	444	T	0.25046	10	YSITVA.FKL	21.47
199	52	P	0.25232	12	PDEIQGRA.VST	21.62
1241	402	G	0.25417	14	GEDNLYKF.HQMTR	21.77
834	283	R	0.25603	15	GKARDSQMEPF.NHT	21.81
588	158	D	0.25788	14	NAREDTKVYISHGQ	21.91
742	259	V	0.25974	11	RSNLMVAFTI.	21.99
676	211	S	0.2616	16	ENDV.SHATGLPQRIY	22.04
704	225	I	0.26345	14	L.IVMENSFAQTRK	22.07
735	254	R	0.26531	16	DNQEMKRLIHVF.SAW	22.17
745	262	L	0.26716	7	FRVLI.M	22.17
465	132	V	0.26902	11	VNSFALIME.T	22.17
667	204	I	0.27087	11	TAKVIFLPS.M	22.34
1215	383	I	0.27273	15	KEQIVTRLNCFMHY.	22.4
741	258	T	0.27458	15	TRLVKMHSQANEDG.	22.46
902	298	K	0.27644	17	QSNAFKYEDGLTHIVMR	22.54
887	288	I	0.27829	6	LVIMFA	22.68
476	135	T	0.28015	14	PEQRIDTSLV.FKM	22.72
1575	492	Y	0.282	15	TYAFVSNCIH.LWPE	22.82
1518	485	R	0.28386	15	G.ARVQSDLEIKNPT	23.29
998	333	Y	0.28571	5	YTFHL	23.65
474	133	N	0.28757	14	ENTSFV.DYKHACQ	23.8
617	177	Y	0.28942	10	FVDYMICAHN	23.82
1572	489	P	0.29128	13	LVPRQIK.TENHY	23.89
475	134	I	0.29314	8	VRISLM.T	23.97
385	106	M	0.29499	14	YNRVLMEAIG.FTK	24.13
1002	337	P	0.29685	14	.NSKPATLEIRMQH	24.2
1493	471	L	0.2987	20	.KGILQYWDARFNEVSMPHT	24.28
207	58	T	0.30056	14	PSCTKVLFI.AMED	24.36
995	330	K	0.30241	12	AVTLKMQECRHS	24.39
990	325	D	0.30427	13	SFRNDHKAQYTME	24.39
627	181	D	0.30612	12	DR.NSEQTVLCH	24.52
589	159	Q	0.30798	15	DETQAIVWKSRGNML	24.55
1119	370	S	0.30983	8	ASGTP.NE	24.89
1018	352	N	0.31169	17	GPSARNYFQKHDLV.TE	24.92
1021	355	I	0.31354	11	VERIAQKDTL.	25.01
700	222	H	0.3154	13	V.IEANHRDFLYT	25.03
698	220	I	0.31725	9	LYIRVH.MS	25.27
670	207	T	0.31911	15	YAL.IFTVSREQKDN	25.37
1222	389	H	0.32096	13	YHQDNSLRKE.AG	25.64
1652	515	G	0.32282	14	ACDGVL.EYRQISM	25.7
705	226	K	0.32468	15	L.AGEQKRNTSPDHI	25.75
727	247	L	0.32653	18	HIWVLMDNSTKCA.GPFY	25.79
699	221	I	0.32839	18	NSLQVIARTKED.HYMFP	25.8
1403	441	K	0.33024	12	KTRVSA.LHQDM	25.82
703	224	E	0.3321	12	V.SQLPEFTIAM	25.86
386	107	F	0.33395	12	LEVNFRTAI.QC	25.9
702	223	F	0.33581	17	E.DQRMFKNSTIPLHAV	25.94
832	281	L	0.33766	19	ICNSLKRHTEAYQ.FDVMP	26.19
1198	377	D	0.33952	12	.DNAWLKFYEVM	26.25
223	70	I	0.34137	16	DCLSI.NVTWPAGEQH	26.28
1654	517	P	0.34323	13	KCIPASVHT.RGL	26.36
1113	367	F	0.34508	12	HNDFYRT.QSLG	26.36
1197	376	I	0.34694	10	.TILEVYRAM	26.59
1248	404	F	0.34879	11	HYWFGLKA.TV	26.71
760	274	I	0.35065	18	.QYITKEVCMRDAHNPSG	26.73
888	289	S	0.3525	14	EDYSQKVNTAMHRG	27.1
1229	395	H	0.35436	15	HYQDKEFGNLRVMS.	27.11
1008	343	Y	0.35622	16	.GNYKTISDLFQERAV	27.27
565	148	I	0.35807	9	VA.GIQTLM	27.41
728	248	D	0.35993	16	FEPKDLIYAS.QTGWM	27.43
1001	336	R	0.36178	16	.EFGKRQVAYTLHMIS	27.55
891	292	K	0.36364	16	MRASTDKELIQYNV.F	27.58
666	203	E	0.36549	15	.AYQELRSDKVGNTH	27.67
709	230	A	0.36735	16	.RNDIAGVLQESHPTF	27.74
1005	340	P	0.3692	14	QL.PAMRHDKSTVI	27.82
633	187	H	0.37106	13	LGN.HSDPKREQA	27.88
205	56	D	0.37291	14	SGNTEDRPKYFA.Q	27.94
566	149	V	0.37477	18	KT.AMVGIFNDEQRLWYS	27.99
979	318	E	0.37662	15	PKEDVNLSQFARTIM	28.17
427	122	T	0.37848	17	QSGDNTF.VIPLRAEKY	28.19
687	215	T	0.38033	18	.RTPLSNYIVQDCHGFMK	28.26
671	208	E	0.38219	16	EQ.GKTRSLPDNHIAM	28.41
1413	450	D	0.38404	14	SEQ.DGNTHRKMAV	28.44
987	322	T	0.3859	16	QTVAMEGCIDKRSHFY	28.46
1448	458	W	0.38776	13	TIPNW.DHASEKG	28.49
747	264	I	0.38961	11	VRQSGIMLFA.	28.74
753	270	A	0.39147	18	ETRSVANF.YQGDHLIKP	28.83
516	139	S	0.39332	14	ST.NGQLVEDKAFR	29.18
918	308	Y	0.39518	19	SWIA.TYVNQPFGREDKLH	29.19
1111	365	E	0.39703	14	QFDNKGERMSHT.I	29.41
478	137	S	0.39889	14	NRT.QSADHKPEVG	29.42
657	199	H	0.40074	18	MI.RHSTLENFQAKYVGD	29.45
655	197	S	0.4026	19	NGESPYTQKAI.FLVDRWH	29.49
675	210	Y	0.40445	16	HQYS.GDNTAFLMVPR	29.63
569	150	I	0.40631	9	VAIEDLMF.	29.77
570	151	T	0.40816	18	EDRPTLYVQFSHKIM.AW	29.83
748	265	R	0.41002	15	VLERKQSTHANDI.C	29.94
999	334	Q	0.41187	17	YKHRNQWSF.VIELMCA	30.14
1281	416	V	0.41373	14	DTVYPIASF.LGRH	30.3
206	57	M	0.41558	18	FLNCIMTEDHPV.GWKAS	30.52
1405	443	G	0.41744	14	GFNPYHRQS.KEAT	30.71
142	44	V	0.41929	16	CVTSDFG.REQPLAMH	30.75
430	125	E	0.42115	16	ESRLN.AHTDQGYKPF	30.87
558	141	T	0.42301	17	VDQNTASEPRLHKM.IW	30.94
694	216	T	0.42486	17	VPESTKANRQGYDILM.	31.27
807	277	D	0.42672	17	.LDQVAENTPSHKMRYG	31.56
381	102	P	0.42857	17	PSNILR.QTEVKGHAFD	31.62
809	279	L	0.43043	17	.EPLIATKDNGSFRQVH	31.62
831	280	H	0.43228	18	YKILSTHNPEAFD.VMQG	31.66
665	202	L	0.43414	16	.SNKPLHTDFEIQRGA	31.67
572	153	E	0.43599	18	QEYHWKGFLSANVIR.TC	31.68
455	126	Y	0.43785	16	GDY.VALFNHRSIQTP	31.83
421	116	T	0.4397	16	AVSTGR.FKEINPLQD	32.18
574	155	G	0.44156	18	APQREGLSKDTYFI.MHN	32.41
1500	472	L	0.44341	18	IDSNLHTAG.VEWPQCMR	32.52
668	205	I	0.44527	16	IMVELFNYKSTR.HQA	32.78
754	271	V	0.44712	19	KS.YFTVLHGRDPNIEMAQ	32.94
222	69	D	0.44898	15	CQGNDTEH.LSFIAY	33.1
992	327	G	0.45083	10	EDQGNRHTAS	33.14
833	282	A	0.45269	17	RKQSAYHELVNID.GMT	33.15
1247	403	Y	0.45455	10	FYTSHAMW.N	33.6
1019	353	T	0.4564	16	Y.GPKATVSNEQMIDH	33.63
1336	423	N	0.45826	15	HN.PGTSDYEFQVKR	33.73
750	267	L	0.46011	16	HSEIDLYQR.TNKVMA	33.77
596	161	I	0.46197	16	LIQTYVMKRWASCEFG	33.79
1574	491	A	0.46382	14	NFGHAST.LYKPQM	33.82
808	278	E	0.46568	19	.PERDYTANHQVSFKLIGM	33.87
1114	368	G	0.46753	14	GSNDE.IMQRLHVK	34.32
1717	536	P	0.46939	16	.KPCRQGSVANTFDEI	34.37
607	168	Y	0.47124	15	YDFNRGATK.HSELP	34.39
257	79	F	0.4731	14	.AFYGKRSWEILHV	34.5
429	124	K	0.47495	18	FIMLRDKQS.PTWYVEAN	34.54
1715	534	A	0.47681	16	.CLIAEPSKRFMVGTY	34.81
1017	351	A	0.47866	16	GSPLNQAR.TKDVEIH	34.9
382	103	P	0.48052	13	SGWLVPFAI.NKT	34.93
1503	475	Q	0.48237	19	SNH.LQYGKADREVMFTPI	35.17
1419	456	N	0.48423	10	YFN.HTALIW	35.32
221	68	P	0.48609	14	NSGLVTPA.KQRHI	35.45
673	209	E	0.48794	17	.KNEDQYPSARVTGFLI	35.52
738	255	D	0.4898	14	.QDKENPMRGSTAH	35.52
679	213	G	0.49165	19	PVR.GALTSIWENQDFKYH	35.69
366	97	P	0.49351	17	P.SDRAKGEYLNVTIFH	35.75
204	55	T	0.49536	18	WFDGTMKSQLEAV.RIPH	35.91
1655	518	P	0.49722	17	TYNVHIPDAS.LKFEMR	35.95
1254	409	A	0.49907	17	.STAWNKVRMILEYPQH	36.11
1420	457	S	0.50093	16	YHS.WFTANDRMEVKQ	36.27
1660	523	A	0.50278	15	LQVNGSATRKHD.IE	36.33
219	66	D	0.50464	18	LQINGADEVTP.WSMRKF	36.4
203	54	S	0.50649	16	YHFTNSVALIPM.QWE	36.42
610	171	T	0.50835	14	VTARNSP.DKYHEI	36.42
1718	537	L	0.5102	20	.TLVKGCRPDEHQSAFMNYI	36.5
1504	476	N	0.51206	17	SA.QNIEVDRTGKHPFL	36.52
1121	372	R	0.51391	16	SQARIEVT.DKGYHNL	36.54
1211	379	L	0.51577	16	.KLGDEHSVRCTANIQ	36.56
653	195	D	0.51763	19	VEITRDGLPSNQKHY.WMA	36.58
652	194	K	0.51948	15	LVNKRPEDQASIMGT	36.65
719	240	M	0.52134	19	LFV.AMRHYQDEPNSIGKT	37.09
1228	394	Q	0.52319	18	DIRESQ.TPKHAVNYMLF	37.75
352	93	D	0.52505	18	KDSFRNEPVYT.AHIQMG	37.76
463	130	L	0.5269	17	IFDNQLPREASTGH.KV	37.81
1576	493	T	0.52876	18	FTASQLERIYGCHDK.VP	37.86
908	304	T	0.53061	17	APSGKDTNQYRMIELVF	38.01
1620	503	E	0.53247	18	DGNREAQCFT.HSYKMVI	38.07
1392	435	S	0.53432	17	PTGAKSDNVIL.FYQEH	38.1
1713	532	G	0.53618	18	.GVWALERKNSTFHMYID	38.13
190	48	M	0.53803	20	.DMYRENSTVLGIFPWQAHK	38.13
384	105	L	0.53989	15	YFDRNHLMSA.QKGE	38.14
191	49	A	0.54174	18	.RAGEVPYTSIMHQDKNL	38.4
255	77	E	0.5436	16	IAGETPLQNSD.VFHK	38.51
214	61	L	0.54545	17	FE.CLVNPQYRKSTHAD	38.61
695	217	N	0.54731	16	GNTLSKDQHRPIEAV.	38.72
729	249	T	0.54917	17	HDFYLTSENGAQ.RWPV	38.9
1129	374	S	0.55102	17	DN.ESHYVFLTARKQIM	39.15
417	112	R	0.55288	18	RK.TVEPNGSYALDMQIW	39.43
733	252	K	0.55473	17	G.VQKNREDASHTYIML	39.44
1638	509	G	0.55659	19	KPTDSLGNYF.EVAHRQIM	39.45
426	121	A	0.55844	18	TAIPYRLV.NHSQEGKMD	39.55
1622	505	A	0.5603	18	FYIA.QKNHWRLCDTVEM	39.83
1623	506	G	0.56215	16	GLKADNWVFHSTR.EQ	39.93
631	185	A	0.56401	17	AVHT.YFSDLKQEINRM	40.21
1395	437	F	0.56586	17	NEHAVFTQDIRYKM.SL	40.29
976	316	E	0.56772	13	LESQVKNADIMRT	40.37
1253	408	S	0.56957	17	T.GDSIAENRKLQYVMH	40.54
641	190	P	0.57143	17	PE.AMLRHTSKGQYDNF	40.71
259	81	A	0.57328	19	DGLRIASTNCEKPVF.YQM	40.89
626	180	T	0.57514	19	G.STEDRQKILWFNAPVYH	41.05
601	166	L	0.57699	20	VLGTKDRIS.NFAQYPWHME	41.14
649	191	K	0.57885	15	DPTKRENIQASLHVG	41.21
974	314	T	0.58071	17	QVKTE.MNIARWHSYLG	41.35
354	95	S	0.58256	17	NILSKERQA.YGTHDFP	41.39
909	305	V	0.58442	18	QATRVLKEHNSFYGWMID	41.43
260	82	M	0.58627	21	MQLHAKPEVNICGYF.RWDST	41.57
1416	453	L	0.58813	18	AMLSK.NRQYIVFEDGTH	41.68
345	89	N	0.58998	18	FQDYSNLTAVEHGKC.RM	41.69
656	198	Q	0.59184	20	NGRFAQSPDT.LWIHVKEMY	41.78
1218	386	S	0.59369	12	NSKDAGTQREH.	41.79
1220	388	K	0.59555	16	KQRSTLEMAYDGINV.	41.81
933	310	N	0.5974	15	.DNEKGQLRPSHVAT	41.85
650	192	S	0.59926	20	VIQLSRNDKATPEGWH.FYM	42.07
1261	413	D	0.60111	18	ST.HDEKANGIPRYQVLF	42.09
268	85	P	0.60297	19	AGDLSPF.VETMQNHYIKR	42.23
464	131	Q	0.60482	18	NGVASPQDERTKFH.MYW	42.28
1509	478	G	0.60668	18	GDNV.LISTPMAEQKHYR	42.32
1252	407	A	0.60853	20	A.TPRGKDIVSLMEWYFHQN	42.45
1354	427	S	0.61039	17	S.FGTVAMIQHERLKYP	42.49
267	84	N	0.61224	18	NTEDGS.AFPQYHRMVLI	42.55
732	251	K	0.6141	19	SL.EVKDTPQAMRGNIYHF	42.61
237	76	P	0.61596	15	DNPAQRTSKGV.EHL	42.77
1237	398	L	0.61781	17	TREVQLHSWNIKFYM.A	42.8
1225	392	R	0.61967	15	TEYQMRKANIVSD.H	42.99
1264	414	E	0.62152	19	PY.TERVSKILMAQHDNFG	43.06
140	42	G	0.62338	19	RDHGATPSN.FYQECKLIM	43.11
654	196	L	0.62523	19	GRKLMVTDPEQSNHAIF.W	43.15
1482	464	P	0.62709	15	PRAESNQGVKLHT.D	43.17
1450	460	Y	0.62894	19	EQIRKAYD.FNPSGLMVTH	43.27
1650	513	G	0.6308	18	NPE.SAGQDRCKHTVLMY	43.29
1199	378	L	0.63265	18	.LFPVASTRDEYQMNKHI	43.44
1390	433	N	0.63451	18	FLSQNDAREKPV.GMTIH	43.56
1255	410	Q	0.63636	18	.APQGESDNKRTFHLWYV	43.63
1240	401	L	0.63822	20	EKPLVSDANTQIHGMYFRW.	43.84
215	62	K	0.64007	17	.ANGKTYIRSDMEQHPL	43.92
726	246	Q	0.64193	20	TLSFQRY.NDGIKEPAWMHV	43.93
1621	504	E	0.64378	18	HYFEG.LTSPAMWKRDQN	43.94
266	83	G	0.64564	19	DVYASGKENHTPF.ILMQR	44.1
415	110	E	0.6475	20	S.KEQYDINGRHTFWLVPMA	44.14
677	212	T	0.64935	19	EPTDG.RKQSNAHFYVLMI	44.3
1502	474	C	0.65121	18	SEGHNCYAPD.MIQTRFK	44.39
370	99	L	0.65306	19	TRV.LDNEKYFIQGPAWSH	44.4
202	53	E	0.65492	18	GADREKLIVFSP.QNTMW	44.5
1217	385	V	0.65677	17	F.LYVDITSENKQGHRM	44.51
371	100	A	0.65863	18	CR.SAIQTEGYNPVMKDH	44.51
1656	519	H	0.66048	19	QSGPRHADLVY.EINTKMW	44.87
936	313	L	0.66234	18	.GLNRITQAMSKEPDVHF	44.95
1584	498	E	0.66419	15	EDPNASGQK.TRYLC	44.97
416	111	G	0.66605	17	DA.GQENTYPLSIVKRH	45.09
1361	428	I	0.6679	18	F.HSIWVGTDANPKREQL	45.22
1362	429	H	0.66976	19	A.PNHWLKGDSTVMEIQYR	45.42
1259	411	L	0.67161	19	IQ.YLPKTRAHFMDVWENS	45.65
1009	344	L	0.67347	20	.SGLRNAQKETPDIYVMWHF	45.7
217	64	K	0.67532	20	CDKPYIALSV.TRQHMNFEG	45.71
1337	424	P	0.67718	17	PQ.LHGSEKTAIVFYDR	45.73
934	311	S	0.67904	19	.NPSGRTQIHLVKDEMAYF	45.74
1004	339	S	0.68089	15	Q.PASRKLHMETCGD	45.77
1657	520	G	0.68275	19	NFVHG.STQACEKLDMIRP	45.96
630	184	D	0.6846	16	GDL.AESRNTKQHPVM	46.09
1363	430	D	0.68646	19	K.DTSNPFLIERAMVGHQY	46.2
198	51	Q	0.68831	18	KQDAFMVELPSY.HNITW	46.41
1514	481	H	0.69017	18	DNSHLYQ.EVGTACRKPW	46.44
1636	507	S	0.69202	16	ESP.DTARNGKLHVMQ	46.57
1490	468	D	0.69388	18	NSPD.YVGAHLFKERITQ	46.58
1414	451	E	0.69573	18	FRGS.EQDTIMAVLKHNY	46.63
1684	526	L	0.69759	17	.PGSLRAQKNHDVECMT	46.85
1260	412	D	0.69944	18	G.NDVPSLYTQARIKEHM	47
651	193	V	0.7013	19	IVCTYAKGQSDEPRNLHMF	47.05
635	189	D	0.70315	19	LARE.TDPSIKGVMQYHNF	47.21
1319	419	E	0.70501	17	IPRQ.ELSKMDVANHTY	47.45
353	94	A	0.70686	20	EQVNADGI.STCPMKFRYWL	47.64
408	109	F	0.70872	18	KS.FQRGANDPTIMVELY	47.78
1411	448	K	0.71058	16	QRYT.KSALMHNWDFP	47.78
131	33	C	0.71243	20	C.LAWMIVETKDNHFPQRSG	47.81
917	307	V	0.71429	18	LSAV.DTNIREKGFQPYM	47.86
1682	524	L	0.71614	17	.LDSPQFTYAGKNEIVM	47.99
1714	533	T	0.718	19	.ENQSTLYRIKGAPDVMHW	48
1280	415	N	0.71985	17	YNPSGDEQKLM.HTARF	48.18
1010	345	P	0.72171	20	.RQPNDTIVSHFLKAGEYWM	48.48
1653	516	A	0.72356	18	DNEQASITR.GLKVFWYH	48.5
1404	442	T	0.72542	19	EDLTRKAVPSNQ.MIFHYG	48.54
107	9	I	0.72727	20	.CGILVFPATHSDKQMRNYE	48.62
1505	477	G	0.72913	19	FVY.GLIDRNETMQSPAKH	48.66
141	43	K	0.73098	19	TKPLDGQIVNA.RHSEWCM	48.68
1710	529	T	0.73284	18	.SATLGDVFNEKRQYIPM	48.7
634	188	M	0.73469	19	FSNL.MVIQAEHRWDGKTP	49
1283	418	I	0.73655	18	FQISKL.TENVAPRHYMD	49.08
1593	501	R	0.7384	19	ALEQR.VKMDNSCTIYGFP	49.27
1488	466	V	0.74026	16	EIQDNVHLGSAPTR.K	49.33
189	47	Y	0.74212	19	.CGYFKQHAETVNSDRLIP	49.82
1515	482	N	0.74397	19	SNRTDQ.GEPAKVMLFIHY	49.92
106	8	S	0.74583	19	.SCFLPEQTHWMDGVAIRK	50.02
1449	459	H	0.74768	19	NGRPTHV.LDSMQIEKYFA	50.07
935	312	K	0.74954	20	.LSKGQCYAPNDMEVRFTIH	50.09
1400	439	E	0.75139	18	ESLDTPKNQAFIVRHY.M	50.09
343	87	M	0.75325	19	YQGFKDMLTIVNAERPH.S	50.17
128	30	Y	0.7551	19	L.REFYNIVGDSAQKTCHP	50.45
609	170	R	0.75696	19	GQCESRNT.LVHMKAIDFY	50.59
612	173	Q	0.75881	15	RTVKDQHESAGFMLI	50.72
1239	400	R	0.76067	15	VLQAKRISMTDEG.N	50.76
256	78	T	0.76252	19	.GYTSERADNHIKVLPQMW	50.77
1015	350	T	0.76438	15	P.LTSEDQNHYRKAG	50.91
1639	510	S	0.76623	20	NKPCVSQE.ADGTFYLIRHW	51.4
989	324	P	0.76809	18	LQRFNPAEDIKTYVSHMG	51.49
1481	463	Q	0.76994	19	KQRSGFYTELVHADP.INM	51.88
1637	508	C	0.7718	19	LFDSECAGTQ.YNVRKWHP	52.02
1410	447	P	0.77365	19	PDNQ.ERLSTAVKHFMYWI	52.05
1517	484	V	0.77551	18	TLSGVQ.NDREAHYIFKP	52.27
1585	499	K	0.77737	17	IRQVKNEDHGATS.LMP	52.29
993	328	K	0.77922	17	EQRDKSHLMIYTANFVC	52.68
1573	490	A	0.78108	18	NYEPGARSDTLQK.VHIF	52.84
1643	512	S	0.78293	19	KCDESRPTQILA.NHVFMG	52.94
383	104	E	0.78479	18	TYSLEKRGQWA.NVFHDI	53.15
347	91	E	0.78664	19	.NLVERTYKIHQWFMSDAP	53.15
102	4	S	0.7885	21	.FASLTGNVIHRDCEWYKQPM	53.25
139	41	E	0.79035	19	G.QSENLDVAIYRTHPKMF	53.35
1417	454	P	0.79221	19	ADTSP.KFNLVMIQEGRHY	53.72
143	45	W	0.79406	20	SDFWNELVPGQI.KHARYTM	53.78
105	7	L	0.79592	19	.LAGSMPHWVRTFQIKCYE	53.92
1492	470	E	0.79777	19	NLSAED.KGFVQIMRHPTC	53.96
108	10	H	0.79963	20	.HCVTAKISLGPQFYMWNRE	54.03
1329	421	Y	0.80148	17	APEKYGNQD.SRTLVMH	54.11
720	241	A	0.80334	19	ER.AGDPLSQFNHTKVMYI	54.15
236	75	P	0.80519	18	ENRVPAYHGTS.KFDQML	54.7
1619	502	C	0.80705	20	PNVRCASFDHET.LMQYKIG	54.77
116	18	S	0.80891	20	DN.ESRYIQAFLTPKVWGCM	54.79
1120	371	N	0.81076	17	DASNETRKLVQF.MIHY	54.92
110	12	L	0.81262	21	.CALDSYFTIKVMGPNEQHRW	54.98
218	65	L	0.81447	18	QRVEFNLTYHI.SPKAMD	55.01
144	46	D	0.81633	20	SR.CDENGTKQHWLYIVPAF	55.23
109	11	A	0.81818	20	.QNACDETLFVGRHSKPIWM	55.26
365	96	T	0.82004	18	G.DTNIFVQSLRAKHYPE	55.8
367	98	E	0.82189	18	MR.ETNDLISVHQYGKAF	55.82
133	35	T	0.82375	20	C.DSFTAQRGPIVKLNYEHM	55.84
1407	445	T	0.8256	18	FIVETKGAQRSMYD.HNL	55.94
1582	496	L	0.82746	19	AR.KLSNTGDYIQVMPHFE	55.94
117	19	V	0.82931	20	LP.FMVIDCTSEKQRWHAYG	56.01
119	21	Q	0.83117	19	.GDRSQCPVAKLMNFITHE	56.22
103	5	R	0.83302	20	.GCRLAFSVMPIWTHKNYEQ	56.34
629	183	L	0.83488	19	DEQI.LTMNPSGRAKYVWF	56.4
126	28	G	0.83673	21	.DRLGQASTEINFKWCYMHVP	56.4
127	29	H	0.83859	20	.PLDHFICAVNSRTMEGKQY	56.45
1558	487	L	0.84045	18	VLNHAYSQKEPFT.IRDM	57.17
919	309	D	0.8423	19	VCS.KDRTHQGFANLIEMP	58.08
112	14	V	0.84416	19	.LGVTQRSFMIADPWKENC	58.19
1338	425	L	0.84601	20	TAN.ILVEPMFHQDRSGYWK	58.27
101	3	L	0.84787	21	.ADLPRTMFNESIVWHQYGKC	58.35
1391	434	G	0.84972	19	SARELTGVDIMKQP.HNFW	58.73
1683	525	L	0.85158	19	.RLVDKIETNYFASPGMCQ	58.75
111	13	W	0.85343	20	.SAWGLYREPQVMDFINHTC	59
1686	528	T	0.85529	19	.NVLGTISAFPHQEMRYDK	59.09
113	15	T	0.85714	21	.GITNAELWSDFVYHPQRMKC	59.2
118	20	M	0.859	21	FL.PGAMDRSVIQTKNCHYEW	59.31
114	16	V	0.86085	21	QN.YRVLTSAEGPIDKHFWMC	59.74
1716	535	S	0.86271	19	.TPSAGEQVIKLDRHMNYF	60.21
130	32	L	0.86456	21	ER.TLIFPNQSHVAYGKWCDM	60.74
1581	495	I	0.86642	18	ATEL.IVNRQPDSGKHFY	61.58
138	40	E	0.86827	19	VG.ENDSQAPYKLMTHRFI	62.15
129	31	D	0.87013	21	G.EYDFSQNILVWHPCRTAMK	62.16
1491	469	N	0.87199	19	NGPD.TSVLIEFMQARYWK	62.17
135	37	I	0.87384	20	VP.CYIFRKGQESHDATLMN	62.17
104	6	F	0.8757	20	.GQFASTVKNPMLREICDWY	62.42
1516	483	N	0.87755	20	LIHGTN.SKREYQDVFMACP	63.9
132	34	K	0.87941	21	DQ.ARTKFHVCGLNISWPYME	63.9
220	67	P	0.88126	21	CSVTPAQ.EKRIWGHMFYLDN	64
115	17	S	0.88312	21	C.RDSPVTQIMGFLYNHAEKW	64.33
134	36	Q	0.88497	20	K.TYRQWIVFLEASDPNGHC	64.4
1685	527	L	0.88683	19	.GNPSLHCTQKEDIAMWRY	65.14
1501	473	H	0.88868	19	DSVLIHPTR.QAEYFKNGM	66.32
235	74	D	0.89054	18	TVDCNSGELPRQY.HKAF	66.52
122	24	P	0.89239	21	.QAGSPYTNKILRCWFVMEHD	72.93
120	22	P	0.89425	21	.SCPMTIRHEGKVLFWYQAND	73.77
124	26	V	0.8961	21	.QDCSVAGMLTFPEHRWNIYK	74.25
125	27	W	0.89796	21	.CIWSMVQNDLEGARTKHPFY	74.45
123	25	L	0.89981	21	.QCSWLKGDAIVTFPERYHNM	75.31
99	1	M	1	19	.KAMQNEDPHTGSFLRVCW	75.42
100	2	Y	1	18	.PIYLGATSQKMFCVRND	75.42
121	23	Y	1	21	.IVTWYHANMQLSGFDEPRCK	75.42
136	38	Y	1	21	NG.DQAYTRMFLEHSKPWCVI	75.42
137	39	T	1	21	IV.EMSTFYAGQCNRLDPKWH	75.42
212	59	K	1	13	.CKDTARLVFIEN	75.42
213	60	Y	1	9	.RYANDGQV	75.42
216	63	V	1	10	.GCFVAITSM	75.42
269	86	Y	1	4	.YCD	75.42
346	90	N	1	9	.GKNPDASH	75.42
418	113	H	1	7	C.TSHGN	75.42
419	114	P	1	8	NA.ESPLY	75.42
420	115	S	1	9	SV.GLQADN	75.42
456	127	P	1	13	TRE.PSKGDNLHQ	75.42
457	128	K	1	9	.GKISELNA	75.42
458	129	P	1	8	.SPGTIEA	75.42
563	146	D	1	5	.DLNG	75.42
658	200	T	1	8	.RTGSDAI	75.42
710	231	F	1	5	.FIML	75.42
711	232	F	1	4	.FYL	75.42
712	233	A	1	4	.ALF	75.42
713	234	G	1	3	.GS	75.42
714	235	P	1	4	.PSD	75.42
715	236	R	1	6	.RDMNG	75.42
716	237	L	1	5	.LMFI	75.42
717	238	R	1	5	.RNQT	75.42
718	239	N	1	3	.NP	75.42
721	242	S	1	12	.RKSNFPAQYEG	75.42
722	243	L	1	13	.KILGVRAMTESN	75.42
723	244	Y	1	4	.LYA	75.42
724	245	G	1	5	.MGTP	75.42
806	276	V	1	18	.TVGLIKARYNSMHQFED	75.42
1007	342	S	1	5	.SNTG	75.42
1011	346	I	1	7	.GILPYE	75.42
1012	347	P	1	4	.PLI	75.42
1013	348	K	1	9	.RKHNESVT	75.42
1014	349	G	1	5	.PGDN	75.42
1022	356	P	1	4	.PAL	75.42
1023	357	S	1	4	.SAV	75.42
1024	358	I	1	5	.IGTK	75.42
1025	359	S	1	4	.SLE	75.42
1026	360	S	1	4	.SAL	75.42
1027	361	I	1	6	.IVFLE	75.42
1028	362	G	1	3	.GS	75.42
1089	363	N	1	4	.NDL	75.42
1364	431	R	1	16	SPT.IRLNVDMFAEQH	75.42
1510	479	T	1	10	ANTD.ESYPI	75.42
1651	514	Q	1	13	.SQPGHKVEANLM	75.42
1658	521	S	1	11	LGI.SPEQTAV	75.42
1659	522	P	1	15	ETDL.MPAQGVIRHN	75.42
1711	530	L	1	5	.MLFY	75.42
1712	531	L	1	5	.TLRA	75.42
1719	538	V	1	19	.TVPGANHDEYSKQILCRF	75.42
1720	539	F	1	17	.FYNSAQHLEDGTVMKI	75.42

## Sheet: NTNG2
alignment#	residue#	AA type	coverage		variability	Score(rvET)
888	305	C	0.00755	1	C	1
891	307	C	0.00755	1	C	1
902	316	C	0.00755	1	C	1
905	319	C	0.00755	1	C	1
899	313	G	0.00943	2	GR	1.44
537	171	C	0.01132	4	HYCG	2.87
578	195	C	0.01321	6	IAYCSP	2.89
842	292	H	0.01509	5	LKEQH	3.51
897	311	T	0.01698	5	YTSAF	3.64
979	344	C	0.01887	4	CMS.	3.75
837	287	C	0.02075	7	YVCA.LM	4.26
1248	406	C	0.02264	5	CTL.A	4.29
496	146	P	0.02453	5	EDPSA	4.44
1201	376	C	0.02642	5	CQVA.	4.52
1359	429	C	0.0283	5	CT.SG	4.54
1356	427	C	0.03019	6	CRE.FS	4.59
846	296	C	0.03208	8	ILACTV.S	4.63
1071	355	C	0.03396	5	CSA.K	4.66
839	289	C	0.03585	6	EDLCW.	5.1
895	309	H	0.03774	10	PAKHGT.SRE	5.11
1198	373	C	0.03962	5	CDLS.	5.24
1371	438	C	0.04151	6	C.SMKN	5.34
1212	385	C	0.0434	4	CL.V	5.44
1196	371	V	0.04528	8	GTMVISA.	5.49
1220	388	C	0.04717	5	CGF.V	5.75
1110	362	C	0.04906	5	CAIE.	5.83
1068	353	C	0.05094	7	CKSRM.P	6.1
330	107	W	0.05283	6	.FWHKI	6.22
1297	411	C	0.05472	6	CT.SRP	6.56
841	291	L	0.0566	8	GPAQNL.R	6.69
1375	441	C	0.05849	6	C.TASL	7.14
1208	382	G	0.06038	5	GK.VD	7.22
504	154	S	0.06226	5	SKLRV	7.62
1326	421	C	0.06415	10	CI.SGKLYVN	7.74
1195	370	V	0.06604	13	T.YSGKNVHEMRQ	8.32
960	328	W	0.06792	10	NSLYCFWH.P	8.44
1294	409	C	0.06981	8	CGI.NFLP	8.76
843	293	A	0.0717	4	ATGS	8.77
667	250	T	0.07358	8	.STRDKQV	9.51
340	109	S	0.07547	8	TSPA.KCF	9.59
625	218	R	0.07736	13	Q.TIRNKPGSEHL	9.63
820	276	Y	0.07925	8	RHIF.YVT	10.01
1354	425	G	0.08113	10	ILFGDPV.AE	10.15
1206	380	T	0.08302	9	TSIRKN.FA	10.42
829	285	G	0.08491	8	ARKGS.TL	10.48
525	167	Y	0.08679	8	FYPSLVMH	10.6
957	325	T	0.08868	8	RNGQAD.T	10.85
270	81	C	0.09057	9	CIVF.STKA	11.09
1368	435	G	0.09245	10	G.AEDSPNRV	11.13
1465	454	N	0.09434	8	CKS.NRVL	11.38
1112	364	Y	0.09623	9	CP.YFLNVR	12.07
541	175	F	0.09811	7	YVASFWT	12.38
954	322	N	0.1	8	GLAMFNSP	12.43
503	153	K	0.10189	9	TNQKLRYAH	12.61
641	232	N	0.10377	13	PEVSQD.LRNCAT	12.67
1428	451	C	0.10566	9	CV.RALDFI	12.93
495	145	R	0.10755	12	ATLRGVPQMKIH	13.12
501	151	L	0.10943	7	NVGLIFM	13.27
568	190	A	0.11132	11	.SPVADNYELI	13.61
830	286	R	0.11321	17	SKACPYFGRHTN.EQMV	13.65
657	243	L	0.11509	8	MLVAFRI.	13.69
364	115	Y	0.11698	12	.GTPDYKNSLEI	14.04
526	168	A	0.11887	8	GINSAVTD	14.13
520	165	Q	0.12075	13	ASGRHLQKMFYIV	14.42
329	106	Y	0.12264	11	CHFYWST.IQL	14.43
1467	456	C	0.12453	12	CHSN.EIGKRMV	14.44
953	321	K	0.12642	10	PSDAEKYQVT	14.9
481	142	E	0.1283	16	WF.VLEDINKRHQGAY	15.02
670	253	R	0.13019	9	.DREQKLMW	15.03
502	152	E	0.13208	10	EDSLQKMYHF	15.08
518	163	P	0.13396	10	PSVEDATKRI	15.57
1571	489	P	0.13585	12	CIARTES.PLNH	15.69
294	90	H	0.13774	12	SEQHFNLV.RAY	15.72
1394	444	T	0.13962	11	GTSQNH.KDAM	15.82
519	164	Y	0.14151	9	SNVILWYFM	15.9
673	256	L	0.1434	5	.LMFI	15.95
1648	499	G	0.14528	11	CVTAFYS.GKQ	16.11
1568	486	C	0.14717	12	CNAPKFHD.SYI	16.11
821	277	A	0.14906	8	DSA.VTRG	16.12
827	283	V	0.15094	8	ILVQ.MTS	16.2
515	161	W	0.15283	8	RSTLYFAW	16.3
595	200	S	0.15472	14	.MPATNQSDRGIYV	16.33
1544	475	C	0.1566	12	C.STNVGHLRAE	16.64
263	77	C	0.15849	13	CVELQAFSKHI.P	16.88
662	246	F	0.16038	12	F.GEHWYRLQVM	16.91
387	127	W	0.16226	10	TF.ILEAMWV	16.95
1547	477	C	0.16415	13	C.KSTLIPGDWYF	16.96
896	310	N	0.16604	10	GPNHF.YDSK	17
339	108	Q	0.16792	13	QRKHILVY.MTSA	17.04
182	69	C	0.16981	15	CNGFYSQP.AVKETR	17.44
665	249	L	0.1717	9	AVMLTI.SF	17.59
1097	358	H	0.17358	11	HNAKF.RTLYS	17.68
154	60	T	0.17547	8	CH.MSATK	17.86
478	139	M	0.17736	11	IM.FTYLVASP	17.94
469	133	L	0.17925	10	L.PFRYIVKM	17.95
512	158	G	0.18113	8	FSGTNAKD	17.97
814	275	F	0.18302	12	L.YHFQKWVTSN	18.18
824	280	N	0.18491	11	NSGEDRHQAK.	18.27
840	290	N	0.18679	8	NHPYF.SD	18.28
963	331	G	0.18868	10	YFSQCGA.TN	18.28
613	208	E	0.19057	13	KAVDLQGSETWNP	18.39
603	204	G	0.19245	16	.PGQVCSHRYITALFE	18.58
1696	510	P	0.19434	11	KQNG.ARSHPL	18.63
808	274	Y	0.19623	15	LV.FYHSDATMWCIQ	18.72
675	258	R	0.19811	14	.KPTDQNGRESLYH	18.73
1302	415	G	0.2	16	EPHFG.LRSYKIVANT	18.79
499	149	M	0.20189	9	MGF.LIAVW	18.83
470	134	T	0.20377	17	SF.MGKDETIRQHAVYN	18.84
524	166	F	0.20566	7	YFHANIC	19.03
471	135	D	0.20755	13	GQIYDTNREFSH.	19.04
482	143	Y	0.20943	13	VL.YPNTSERGAW	19.07
506	156	D	0.21132	15	EDAQKNTG.CRSHYW	19.22
468	132	E	0.21321	13	RP.EIQSTYHLDV	19.26
1564	483	G	0.21509	13	GNSRYHQ.AMKLT	19.31
668	251	D	0.21698	14	.NSGDHFYREQAKT	19.47
663	247	F	0.21887	13	QLMFAVISEYTG.	19.62
825	281	I	0.22075	9	IMHLVFW.Y	19.7
467	131	V	0.22264	10	IF.AYTQLMV	19.79
313	97	D	0.22453	14	KNSDF.TAVRIPLG	19.86
658	244	K	0.22642	16	VTKPLAFHQIDMR.SW	19.89
676	259	P	0.2283	14	.AYPMLHFQSRIVT	20.07
1658	502	C	0.23019	11	CDAGLVE.SMR	20.18
614	209	K	0.23208	13	QNREVASTKDLIH	20.29
1660	504	R	0.23396	13	CDHIA.GRNFVSL	20.38
1365	433	A	0.23585	9	YIVTAL.FK	20.57
1197	372	T	0.23774	15	IKVAHRMLNQFSTY.	20.6
1360	430	R	0.23962	12	KLRVP.SHQDMA	20.74
1230	394	R	0.24151	14	GRYEKPIQHM.TLA	20.77
1218	386	Q	0.2434	10	DEHQFR.NTA	20.97
373	121	A	0.24528	11	.HEVIALSTPM	21.03
425	129	K	0.24717	14	NT.ASQKGLYDHRE	21.19
362	113	S	0.24906	14	.YISEKQTFARGDL	21.29
343	112	W	0.25094	14	LMTVCW.DIFKSNY	21.31
1205	379	N	0.25283	11	YNHQDP.FRSA	21.35
576	193	V	0.25472	10	SMVTPAIF.L	21.39
1325	420	R	0.2566	17	STIAPYDQVMLF.HNRE	21.51
155	61	C	0.25849	14	DFGKSQLR.TVCME	21.52
497	147	T	0.26038	13	EDKASRGHYIVTQ	21.69
1194	369	N	0.26226	13	ND.GLSTRHYIPA	21.71
654	240	A	0.26415	14	SKENVGDAPQT.HF	21.74
299	95	M	0.26604	12	CVSIELMGA.TK	21.77
828	284	I	0.26792	18	RKGLHFMTEAISWQ.VCY	21.86
498	148	V	0.26981	17	INQA.PRSWDEVGTMLK	21.93
669	252	L	0.2717	7	.IFVALM	22.14
822	278	I	0.27358	11	LNITKVM.YFA	22.26
622	215	V	0.27547	15	SAMFTVPLG.QIKEN	22.43
153	59	I	0.27736	14	IPTHLEQNDSM.AV	22.47
385	125	L	0.27925	14	DS.QFYALGIVMRK	22.53
901	315	D	0.28113	13	SNHYFQAKRDTME	22.59
690	262	G	0.28302	17	GDRT.VPNISYEFLHQA	22.6
651	237	L	0.28491	15	FSVLE.AYIPGDNWT	22.64
1223	391	G	0.28679	15	GELDNYF.HQKMATR	23.14
1232	395	N	0.28868	13	A.NSTPELQDHVR	23.2
838	288	K	0.29057	19	WFEHTYALGDQSK.VIMRN	23.23
955	323	F	0.29245	4	YFHL	23.3
977	342	N	0.29434	16	.ARSNQYFKHDLVGET	23.35
384	124	T	0.29623	13	KS.RDTEQVLFIM	23.61
618	212	R	0.29811	11	VIYHATGFL.R	23.61
616	210	H	0.3	9	LMQVNSI.H	23.72
906	320	K	0.30189	11	ALKMCQSHERV	23.84
131	41	P	0.30377	10	.APEVFYQDR	23.87
1474	460	Q	0.30566	17	INGA.LRDFQYSPTVEW	23.93
624	217	D	0.30755	17	RE.DQLFWVASPNGHYK	23.96
664	248	T	0.30943	15	TSLQRVNAHKMEDG.	24.06
959	327	S	0.31132	13	PSQKTAEILRM.H	24.23
472	136	D	0.31321	15	GMWAVPILT.NDFHS	24.24
980	345	A	0.31509	11	IVEQTDRKAL.	24.37
542	176	G	0.31698	14	GLNDSP.HKRQFEA	24.48
1562	481	Y	0.31887	14	TAFVLHYNCS.WIE	24.55
588	199	Y	0.32075	14	.FLHYIATQGMVNP	24.56
791	268	R	0.32264	15	RQS.DVPMLGEANTI	24.57
1204	378	H	0.32453	13	HDYNSLRKAE.QG	24.68
316	99	E	0.32642	19	CK.PHTVESGRQNDAFYML	24.9
677	260	A	0.3283	18	.SVNAEDYFQHLIRKPGT	25
483	144	G	0.33019	17	MT.ESPYKDRQLAFIGV	25.02
1095	356	Y	0.33208	11	NSFHYRTQLG.	25.22
536	170	D	0.33396	12	NDISQRETVLCH	25.24
1101	359	S	0.33585	8	ASGCTP.E	25.26
965	332	S	0.33774	15	LG.AKTSIDNERVFQ	25.32
137	47	K	0.33962	16	PQEV.DLITAMFKNRS	25.34
620	213	F	0.34151	18	HYVMANFQSIT.RDKPLE	25.37
721	263	G	0.3434	15	GKQPDFL.NATSREM	25.47
886	303	L	0.34528	19	ESGDFY.NCPALVQIRMTK	25.47
476	137	V	0.34717	7	V.LIMAF	25.58
621	214	E	0.34906	14	QWPLFVIKT.SAEM	25.59
342	111	T	0.35094	16	F.DNVQLASRIPEKTY	25.7
1211	384	H	0.35283	16	HKFNYGQSRVM.PEDL	25.77
958	326	R	0.35472	17	DVEKANQYFRLTHMI.S	25.82
689	261	L	0.3566	18	DEY.RLAHCVIQTGNFSP	25.96
129	39	C	0.35849	13	.CVLITFMQYGES	26.03
383	123	I	0.36038	7	MI.VLSP	26.17
143	49	Y	0.36226	17	HSLTGCNAYPDEV.QMK	26.18
564	188	S	0.36415	16	NR.TLSQHKAIEYDVG	26.24
584	196	T	0.36604	18	GDM.RVTSILEQKPYNFA	26.32
585	197	E	0.36792	15	AD.EKGTQPSNRHIM	26.34
1229	393	Y	0.36981	10	YFTLK.SWVA	26.34
617	211	V	0.3717	18	ETDNQLISARHVY.MPFK	26.64
363	114	R	0.37358	14	.LAVSDERNGYQIM	26.84
1559	478	P	0.37547	14	LEKRT.PQNISDYV	26.86
382	122	N	0.37736	16	MS.AFREYNTKHQCDL	27.08
315	98	K	0.37925	18	FLVK.AEYSTNRDGQPHI	27.11
1309	417	V	0.38113	15	N.VRSDETPALIQKC	27.25
1481	461	L	0.38302	15	NSMIAHTG.LVYFRP	27.28
898	312	T	0.38491	16	TAEMCQGKVIDRSHFY	27.34
1070	354	E	0.38679	15	ENGDHFQRKST.PIM	27.34
1372	439	D	0.38868	14	QDE.SHTGFNRKMA	27.35
1308	416	S	0.39057	12	ST.VAGHQFRMI	27.36
1647	498	G	0.39245	16	DNSGLVYQ.REAHIFK	27.45
823	279	S	0.39434	17	KQIRSTEVYDNAMH.FG	27.47
300	96	F	0.39623	10	TVNLAI.FCQ	27.56
962	330	A	0.39811	15	PSERGMKHQA.VLTI	27.64
956	324	R	0.4	17	YHNAQWSFR.VIELMKC	27.84
671	254	M	0.40189	10	.YVPLFIMAG	27.87
892	308	E	0.40377	15	PEQSADVNLKRTIMF	27.9
562	186	S	0.40566	17	FV.NTSEAPLYIDGHQR	28.02
317	100	E	0.40755	15	FG.EQLDTNAPVKSR	28.17
575	192	R	0.40943	14	STHLND.QKVGERA	28.2
1299	412	N	0.41132	14	LF.HSDNYTPQEVR	28.25
574	191	H	0.41321	16	GKSHETDNIQ.RLAPF	28.31
1362	432	G	0.41509	14	GNHPYRTFA.KQES	28.32
672	255	R	0.41698	17	.IVCGQESHATYKRLND	28.39
424	128	N	0.41887	16	VI.GHDFQLESTNKRA	28.42
479	140	T	0.42075	17	TS.ERKGVAYFLCIQHN	28.55
826	282	E	0.42264	17	YTEDFPSRQLINVK.MA	28.84
1697	511	R	0.42453	14	TCDN.ASKGRPIVQ	29.03
604	205	S	0.42642	19	LE.FNDYHISCPQTMAGRV	29.08
652	238	E	0.4283	16	STVDEPN.AYCGQWMF	29.12
796	272	Y	0.43019	17	M.KAQRHTSVYLFDEGP	29.12
1704	518	C	0.43208	16	CAVHGT.PLFISYRKD	29.26
115	33	T	0.43396	14	.CTSGILYRVKNAQ	29.53
477	138	V	0.43585	17	TD.LPYKHSVQRIMEAW	29.6
642	233	L	0.43774	15	STEIGHLAF.PNVQD	29.96
623	216	R	0.43962	15	YTSKQEARN.LPDHI	30.03
577	194	L	0.44151	16	LNIEVAFSTR.MHQYK	30.19
1766	524	L	0.4434	17	G.AQENLFTWSRMKHYV	30.43
646	234	Y	0.44528	19	SNYAL.DGCRHMIFQEVKT	30.58
386	126	S	0.44717	15	MD.HNEPSTKVRQAG	30.85
674	257	L	0.44906	17	.IDCSHYTAKLRQVMEN	30.9
500	150	V	0.45094	17	LMQYVPASIKTRWEFGC	31.11
152	58	G	0.45283	15	ESCNIVPTQW.DGAH	31.19
271	82	D	0.45472	17	VKTDRAN.HSPIEQMFY	31.54
295	91	P	0.4566	17	NPEQILR.TVKGHSFAD	31.56
328	105	T	0.45849	16	RSVTLG.FKEIANPDQ	31.95
978	343	A	0.46038	14	.PASVENQMTIKDH	32.03
971	336	L	0.46226	18	.PNCALTRKSDQIVGEHY	32.73
142	48	D	0.46415	17	CAIRVQSTFL.ENKDWM	32.8
587	198	E	0.46604	17	.EGSRNKVPQATFYDIH	32.86
559	183	R	0.46792	16	ILRNFEPVAMQGKDTS	33.06
466	130	T	0.46981	16	TI.YVERNQLPSAHKM	33.06
136	46	L	0.4717	18	FCT.VADILMRQPKHEGS	33.11
903	317	G	0.47358	10	EQDGNRHTSA	33.18
148	54	V	0.47547	14	GPAINLVSFW.MYD	33.23
1247	405	V	0.47736	16	DTNKPAVIYSFL.RGH	33.25
1561	480	G	0.47925	15	NGHDST.LFYAKPRM	33.3
1768	526	A	0.48113	17	C.LTIAEPSFNMKYRVG	33.33
365	116	P	0.48302	18	.DETNSHLPQFRIVMKAG	33.36
296	92	P	0.48491	14	PLVFASIT.YKNGE	33.68
722	264	T	0.48679	19	PTGDQKE.WCMRAHNVISL	33.83
797	273	K	0.48868	19	MK.SPWFDEHALRNQGVTI	33.85
560	184	D	0.49057	19	.SARLDNTVEGQKHYPWMI	34.05
724	266	V	0.49245	21	STQCLFDGINPAK.RVYHMWE	34.28
795	271	L	0.49434	17	FL.CADESPTIVNMQKG	34.56
844	294	N	0.49623	16	TSEDIAQRNLKGVFYM	34.65
723	265	Y	0.49811	20	VLTSFPIYDE.HAQRNGKWM	34.69
507	157	N	0.5	17	VTYFMGDN.RAHSKELP	34.76
370	118	P	0.50189	19	PLDYTNQAE.GHIVKRMFS	34.84
661	245	E	0.50377	14	ND.GTEMPQKRSAH	34.99
1096	357	G	0.50566	14	GNDESLMIQ.RHVK	35.28
612	207	K	0.50755	16	GSFNPTHDKQREAL.V	35.29
151	57	S	0.50943	16	FECNQGTASLDI.HPK	35.33
1224	392	Y	0.51132	9	YHFSA.LWN	35.42
1193	368	L	0.51321	18	.KPSHGQVRCTALIWEDN	35.67
611	206	K	0.51509	18	ETNSAH.YGRDKQVMILP	35.69
1425	448	R	0.51698	21	GTCVP.DSLIRHQYFWEAKNM	35.95
1235	398	A	0.51887	16	G.TAKRVMEYPLQSIH	36.34
181	68	F	0.52075	17	FKLYRGSA.WEPIVHCT	36.48
1698	512	P	0.52264	16	GLN.AKSEIVPYFTRM	36.57
514	160	T	0.52453	14	NEKSTLPDAVIYHR	36.6
599	202	W	0.52642	20	VPILTCRDFNAHSKME.WQG	36.71
1641	492	D	0.5283	17	D.VTSAWRYQKEGPNMH	36.74
1353	424	T	0.53019	17	ELDKSTNPAVG.IFYQH	36.93
1334	422	N	0.53208	19	EDVN.GKMQAHISTFCRPL	36.93
298	94	L	0.53396	14	GHTYNLFMSA.QKE	36.99
150	56	P	0.53585	11	TGEAPILV.SQ	37.03
1396	446	Y	0.53774	17	YFHWTA.SGVNDRKMEQ	37.03
371	119	L	0.53962	17	FVDQGNPIASRETH.LK	37.04
1103	361	R	0.54151	18	TVSPQAIKRMED.GYHNL	37.2
1395	445	H	0.5434	12	YFKHL.NRPIWT	37.35
854	300	E	0.54528	16	AS.EVLTRGDHPQNKY	37.35
1355	426	F	0.54717	17	HQRFTDANKIYMS.LEV	37.41
535	169	E	0.54906	18	NKSYLERDQTAIPVHFGW	37.52
186	72	E	0.55094	16	VESRHGQDA.TNYFMP	37.59
133	43	V	0.55283	18	.FCNGSVLAHYTPMIEQK	37.7
179	66	E	0.55472	17	SQEGDLTPN.KVFHAIR	37.78
341	110	I	0.5566	18	ASPRGTENHQIK.MVDCL	37.87
1424	447	W	0.55849	18	EVSANGP.HDIWMYQRTF	37.97
1661	505	A	0.56038	19	DSVQRN.HPLKAEFWTYMI	38.3
563	187	S	0.56226	20	TP.AEHNLWIVQSKFRDYMG	38.42
1392	442	L	0.56415	18	ASKQYLIMNHVR.FEDGT	38.62
144	50	V	0.56604	19	CRGVPTFDNLMEH.KSAYQ	38.84
1563	482	T	0.56792	17	YDTSHQKEIR.GVCAFP	38.93
1427	450	G	0.56981	20	FSGTACK.PLNIDERYQHVW	38.95
327	104	A	0.5717	18	SDGKEATVNLR.MQPWIY	39.01
556	180	R	0.57358	16	TKERVQDNAISLHPG.	39.06
289	88	L	0.57547	19	.STLADRQKNYFIPVWEGH	39.1
1222	390	L	0.57736	20	ESPTVADKNQLH.YGMIWFR	39.14
1242	402	D	0.57925	17	.THAPSNDGIRYEQVFL	39.23
293	89	A	0.58113	16	ADSRQTMEGYN.PKVH	39.34
653	239	S	0.58302	18	GVSHADPLNCFYQR.WTE	39.37
273	84	S	0.58491	16	GASTKYR.QNHFEDCP	39.39
557	181	R	0.58679	20	YFGQETPLADRH.NWSKVIM	39.41
1656	501	D	0.58868	17	S.ARQPCEDGKNIHLVM	39.63
505	155	L	0.59057	19	ADLKNI.SRTQYPWFHVME	39.76
889	306	E	0.59245	13	DQVEIAKNLMRTS	39.84
1210	383	Q	0.59434	18	EDPITQRKAVNYMHL.FS	39.87
183	70	S	0.59623	19	KSIDLTAPRCNVF.YQMEG	39.87
1644	495	D	0.59811	18	NATDSPELFRQHIKG.MV	39.92
1111	363	S	0.6	17	D.EQHVAYFKLNRSTIM	40.16
550	179	A	0.60189	17	L.EKMPNRHTSAGQYDI	40.24
540	174	A	0.60377	17	ASQYKDFR.VTLEINHM	40.24
369	117	S	0.60566	20	RYL.SANMTGDKQHEIPFVW	40.45
885	302	S	0.60755	19	VLPSTDQF.RNHYKEMIAG	40.67
285	86	P	0.60943	18	L.PGDTAQSKRYENVIFH	40.77
372	120	E	0.61132	18	NTAPGQERSFH.MVDKYW	40.78
845	295	L	0.61321	19	VTAR.GSKEHQNMLYIDFW	41.08
264	78	S	0.61509	17	NERSFYQVKTHGDC.LA	41.1
187	73	N	0.61698	18	QYGVNKMSA.EDTLPHIR	41.26
1300	413	Q	0.61887	17	P.ISELAGRKTQVHFYD	41.4
794	270	N	0.62075	18	QE.TSALINDKGHFMPRV	41.75
1200	375	S	0.62264	12	DSNGRAKTQEH.	41.81
656	242	G	0.62453	17	EKHQDVARTLSY.GINM	41.93
111	29	D	0.62642	18	.EDGSQHVYIPTNALRKM	41.97
224	75	Y	0.6283	18	RAG.KFQPETNDSLYMVI	42.02
961	329	R	0.63019	15	GPAQKLRHEMSTC.D	42.07
326	103	L	0.63208	17	TELQASYPVIR.KGNHD	42.17
1234	397	S	0.63396	17	RN.DLEGATSKQVIYMH	42.18
855	301	G	0.63585	19	HE.TDRSQLVGKNPMAIYF	42.36
128	38	A	0.63774	17	.RVDQTGEYSAIMHKLP	42.43
598	201	R	0.63962	18	DAKMPQTGRSENHFYVL.	42.45
1245	403	E	0.64151	19	PT.VSKIMLAQHEDRYNFG	42.57
887	304	Q	0.6434	17	NQLVIE.MRKAWHTSYG	42.68
600	203	A	0.64528	20	IRANLPG.MSETKQDFVYHW	42.85
1569	487	E	0.64717	14	NEDQSPK.TRAYGC	42.87
1431	453	P	0.64906	16	PTASEVKRLH.QDNGI	42.87
544	178	S	0.65094	19	YK.TVPEAIDLMSQHRNFG	42.9
1426	449	Q	0.65283	19	EGARDL.STQFNYKMVPHI	42.99
318	101	E	0.65472	17	GT.ANSDPIRKMVEQLY	43.16
847	297	S	0.6566	17	SYLDKERVTNGIAF.PM	43.2
1202	377	K	0.65849	16	QERTMLKDGINSAV.Y	43.28
1642	493	P	0.66038	19	AEF.SRGNDTWLKHPVMIQ	43.68
792	269	E	0.66226	19	ESD.PAQLNTHKMRIVFYG	43.69
1233	396	G	0.66415	20	T.PAREDIVSWLYMGHFNKQ	43.76
1240	400	L	0.66604	18	.KLRVQHAIPTFMDWENS	43.78
1249	407	I	0.66792	19	MTLGEQISNKARV.FHYDP	43.79
1219	387	H	0.66981	17	QLFSHERTVWKYIM.NA	43.86
1318	419	D	0.6717	20	FPI.EALSGRCDKNQTHVMY	43.89
184	71	H	0.67358	19	KEAQVHCLPRGIY.FMWST	43.93
325	102	G	0.67547	20	HVIDF.NSQTRYWKLPGEMA	44.05
561	185	M	0.67736	20	LTRHKGDESNYQPAMIVF.W	44.28
1236	399	E	0.67925	18	TS.PDEGNRAKQFHLVWY	44.32
1373	440	D	0.68113	15	SR.ELVAMQTKHIDY	44.51
966	333	Y	0.68302	20	G.PDRKSNAQEYIHFVTLMW	44.59
852	298	M	0.68491	19	TE.PGFIVNRMSHYAQLWK	44.6
1361	431	E	0.68679	19	PEATNSDKQRLVM.HIFYG	44.61
1645	496	D	0.68868	20	LACEITVSDGPNKFYRQ.HW	44.65
1572	490	R	0.69057	18	ALEQNSVKRDT.IYMGCP	44.66
1770	528	L	0.69245	18	C.NSGIATLYFRQMEKVP	44.73
1207	381	R	0.69434	15	THNSMAKERQIVD.Y	44.87
1199	374	V	0.69623	15	HTLDQSINGKEVR.M	44.95
655	241	K	0.69811	20	VCKTPQEDASLMR.GNIYHF	44.95
1370	437	K	0.7	16	KRY.DMTLQAHNWSFP	45
728	267	Q	0.70189	18	.QEGTLSVIARDHPNYKM	45.11
650	236	R	0.70377	20	LQNRVPE.STCDHFAWMKYI	45.46
1643	494	A	0.70566	18	IVSE.QDATPNLFYGRKH	45.52
1715	520	L	0.70755	19	NPD.VKYSAFMRQTELIWH	45.56
272	83	A	0.70943	19	DALSNR.TVCGFMQKPEYW	45.8
543	177	M	0.71132	19	GLIMHVENAQRWDFS.KTP	45.89
539	173	E	0.71321	16	STPAGQDE.RNKHVML	46
113	31	G	0.71509	18	.GDPISNLRQVFYTAEHM	46.01
145	51	K	0.71698	19	DNGFCAMITLKY.EQSRVH	46.25
1692	506	P	0.71887	19	.GPADLFVEISQNHTKMYC	46.29
1659	503	D	0.72075	20	IEDQPRLACNTHGKV.SFYW	46.55
558	182	A	0.72264	18	KGYNVQESAPDRLIHTMF	46.72
970	335	P	0.72453	15	.RGPEDQNHYKASTL	46.93
1504	471	Q	0.72642	18	DHSNYE.VRQAIFTLGPK	47.23
262	76	L	0.7283	19	ERYDFTVQAGISLKHP.MN	47.24
159	65	P	0.73019	15	EAL.PRSGKTVDQHN	47.25
1285	408	E	0.73208	17	IAP.KTSEHRVLMNDQY	47.75
1488	468	T	0.73396	18	ED.SQYPARKVMLFNGTH	47.87
900	314	P	0.73585	16	RPHNDAYTEILVSKMG	48.19
1646	497	D	0.73774	20	KVHDGYSNARQLETC.PIFM	48.32
130	40	Q	0.73962	20	.LGFDVYPMQETHNKSRIWA	48.44
853	299	R	0.74151	19	MVI.KNQSADTLRGEPCHF	48.57
132	42	K	0.7434	18	.GQRAKPYLIVNSTMEDF	48.61
904	318	K	0.74528	17	DLKREQSHMIYTANVFC	48.64
223	74	P	0.74717	19	G.SPNVHIAETDQKFYLCR	48.71
127	37	Y	0.74906	21	.DNGCRAEKIQHTVSLFMYWP	48.95
1693	507	G	0.75094	19	.PDSFTQAHYVEKLNMGRI	48.96
967	334	L	0.75283	20	YAR.GDNFSTIVLKQPHEWM	49.06
1295	410	N	0.75472	17	ATKDSQNEGPR.VYHLM	49.2
513	159	R	0.7566	18	DEGSINQMTLFKHRAVCY	49.28
1357	428	E	0.75849	18	ANPLSDFEQTKYIVRHM.	49.32
1699	513	A	0.76038	19	MSDR.QAPKVEGNLTHFIC	49.4
110	28	T	0.76226	20	.PESYLFIACDTVGRQKHWM	49.44
1366	434	A	0.76415	17	HTEKQMGIARSVDN.LY	49.55
1369	436	P	0.76604	19	EDQ.PRSVTAHNKIFYMLW	49.73
117	35	E	0.76792	20	.CPLHSTNEDGVAIKFYQMR	49.86
1241	401	D	0.76981	18	.VNPTQDSLAGRYKIEHM	50.04
516	162	Q	0.7717	15	DSQLVETKRAHGFMI	50.15
1769	527	R	0.77358	19	A.EVTKGPNQSRIHLMDFY	50.21
1483	463	C	0.77547	19	ETHNPYSGD.MIQCARVFL	50.23
91	9	L	0.77736	19	.CAMVGRDTILSFPHQNEK	50.32
538	172	M	0.77925	19	LTEQRPNKSM.AGDYVIFW	50.45
1767	525	A	0.78113	20	K.IMETQCGVYRALPSNDFW	50.46
116	34	W	0.78302	18	.LSRNQFVTWMPAEYIGH	50.53
114	32	P	0.78491	19	.QTGNSAVPCRHDELFKIM	50.65
1505	472	N	0.78679	19	SPRDNIVAGQEHKM.LFTY	50.69
1246	404	N	0.78868	17	NYGDKSEQLMHARFT.P	51.07
1771	529	G	0.79057	20	K.LIPRHTCDVAGYFSQMNW	51.26
266	80	E	0.79245	19	TALVH.IFNKEYWRQMDSP	51.44
146	52	V	0.79434	20	IRDYKCEPQLF.SHATMNVG	51.61
297	93	R	0.79623	19	DLSPHQTEGARW.KNVFYI	51.62
180	67	R	0.79811	20	CQELTGKDSANRH.PMVIWY	51.78
1429	452	Y	0.8	17	KESQRTVLYH.DMNIPA	51.86
1649	500	L	0.80189	17	QSDITRAVEKLHN.MPG	51.89
1471	457	D	0.80377	18	SNDGH.YVTAICRFKPEL	51.93
1560	479	R	0.80566	18	NQPVAETSLHK.DRYIFG	52.04
104	22	C	0.80755	21	.GWALDMIFTSNERPQVKYCH	52.49
1466	455	V	0.80943	16	DAQNKEPGHLSTR.VI	52.54
1473	459	D	0.81132	19	NQAL.DFVKGSIMRHEPTW	53.52
1301	414	I	0.81321	21	VAHMCQSNFPTIDLR.GWYEK	53.62
647	235	T	0.81509	19	.PFAQLGSRNYDHETKVMI	53.72
105	23	K	0.81698	20	.NLTCPFGVDQHIASRYKEM	54.06
1393	443	P	0.81887	19	PASDLKFINRVMQEGH.YT	54.11
1221	389	R	0.82075	15	IDNAKQRSVELGMT.	54.17
1352	423	E	0.82264	20	YQSTRVKEDIML.AGNHFWP	54.21
284	85	N	0.82453	18	ND.QIGSAKRHYLVPETF	54.87
1102	360	N	0.82642	17	ADHEFQSLTNRKMVI.Y	55.48
1718	523	G	0.8283	18	GYVTNSA.DFEMKQRLPH	55.9
1570	488	Q	0.83019	18	LWSKVQRNTAEH.MIPDG	55.9
1598	491	C	0.83208	20	PQARLTNDVSFKEHC.MYIG	56.33
1567	485	R	0.83396	20	AHKQNRGTSIVMP.DLFYCE	56.92
83	1	M	0.83585	19	.FDEGVASPQRNLKMCITW	56.99
286	87	D	0.83774	18	QS.NWEVRDTLHMYGKAF	57.13
156	62	G	0.83962	19	QACTDRLSINKEFM.GVYH	57.29
1717	522	L	0.84151	19	ISPRENDT.ALHYGMFKQV	57.41
1716	521	L	0.8434	20	FKASPHTV.NDMRQEGLIYC	57.41
84	2	L	0.84528	20	.GSAMIHTPQLWKNCDVRFY	57.45
1714	519	L	0.84717	20	DSEC.NPQGRTLFAVKHMYI	57.75
112	30	E	0.84906	21	.SQYENKVADGTRHPILWCMF	58.08
126	36	F	0.85094	20	.CESRLKNQYHATGWDFIPV	58.1
86	4	L	0.85283	20	.DGNASEKTQPLWVRYMHIC	58.45
1772	530	R	0.85472	19	P.ENGSHAKVQRDLFTICY	58.65
85	3	H	0.8566	19	.YFGTSARPVHKDLMNIWC	58.73
1540	474	R	0.85849	18	EDQA.TVKSLRHNYMPIG	58.93
106	24	S	0.86038	20	.LCFAGSNTDVEIPQYRKHM	59.25
1546	476	A	0.86226	18	LVHT.PNEAYSQKRIFDM	60.18
158	64	P	0.86415	19	DNGRVTAPSQE.KFHILYM	60.49
147	53	K	0.86604	19	RDANPETQGSKYIHLF.MV	60.54
1566	484	V	0.86792	18	RLAQNEDPSGK.THIVFY	61.15
1703	517	G	0.86981	19	YDAGQIV.NSKELFHMTRP	61.49
1702	516	L	0.8717	20	DQGVANPT.SHLIWREKYFM	61.91
107	25	W	0.87358	21	.VSRPFTAYILEGHQNMWKDC	62.34
157	63	D	0.87547	19	TFPNCRDES.QVYHKALIG	62.51
1472	458	D	0.87736	20	GP.TDVNSIEFMLAQRKYWH	63.29
103	21	I	0.87925	21	.GLDCRSPFYWAIQVTNKMEH	64.74
1506	473	Q	0.88113	20	VNA.QKYCDTRSIEHLFMGP	65.3
1482	462	L	0.88302	19	ALVIGQYRHSTK.EFDNPM	65.75
149	55	E	0.88491	20	TQVSEALIYHRKWG.MFDNP	67.94
87	5	L	0.88679	20	.PTALQVSFYCRIDKNGEWH	68.5
95	13	P	0.88868	21	.GSVYAIPTNKFLMWQHCERD	69.42
88	6	A	0.89057	20	.LAGPVTQMIEWSNYDHCRF	69.43
93	11	C	0.89245	21	.KSMAPTIRLFVCQEHNDYGW	70.47
109	27	T	0.89434	20	.DSAFRIYMLKVETHGQNPW	71.13
98	16	S	0.89623	20	.PIWVKSQNDELATFRHCYG	71.41
92	10	H	0.89811	20	.QSARCVFILETYGHPMNDK	71.54
108	26	V	0.9	19	.CYGHLRFQTADSEKPNIV	72.9
96	14	L	0.90189	21	.CWTKARSGDVEYPLFIQHNM	74.65
94	12	L	0.90377	21	.CWTYVSIHQANMLKDRGEFP	76.87
89	7	L	1	21	.IARYLQNFPSVKDTGMCHEW	78.24
90	8	F	1	17	.GMLFVIRATQPCSHED	78.24
97	15	A	1	20	.HSGLATMFECVDPIQKRNY	78.24
99	17	G	1	19	.QLKAGTSRVMWIPNCHED	78.24
100	18	D	1	18	.GLCFSKIMTAWYQHPDR	78.24
101	19	Y	1	17	.SFDLVGENIKYATMQP	78.24
102	20	D	1	16	.EYRFGSKLAVNTQMD	78.24
134	44	M	1	12	.YSGKRADEVTM	78.24
135	45	R	1	11	.GKDAPENQRT	78.24
265	79	N	1	8	.TKGANWH	78.24
480	141	F	1	5	PS.AF	78.24
565	189	S	1	8	G.QTASIR	78.24
626	219	F	1	9	.LNISPQFY	78.24
627	220	A	1	10	.RLPVKNAQI	78.24
628	221	I	1	11	.VAGHYRFILM	78.24
629	222	F	1	6	.SRFYL	78.24
630	223	A	1	4	.ALF	78.24
631	224	G	1	3	.GS	78.24
632	225	P	1	4	.PSD	78.24
633	226	D	1	7	.WRDNMG	78.24
634	227	L	1	4	.LIF	78.24
635	228	R	1	5	.RQNT	78.24
636	229	N	1	3	.NP	78.24
637	230	M	1	4	.MNE	78.24
638	231	D	1	5	.ADEL	78.24
972	337	P	1	5	.LPIG	78.24
973	338	H	1	10	.LCVKHENTS	78.24
974	339	G	1	5	.VPDG	78.24
975	340	S	1	6	.IGTSR	78.24
976	341	P	1	5	.GQAP	78.24
1032	346	T	1	6	.SPTVK	78.24
1033	347	A	1	5	.IVAN	78.24
1034	348	G	1	5	.SGQN	78.24
1035	349	S	1	3	.SE	78.24
1036	350	F	1	4	.IFQ	78.24
1037	351	G	1	5	.GQFK	78.24
1038	352	N	1	6	.NTDLM	78.24
1190	365	I	1	11	.NRGFQHYIMS	78.24
1191	366	D	1	16	.CQSTDNHGLFKIVER	78.24
1192	367	F	1	14	.DYFRQVSLIKMCT	78.24
1310	418	H	1	16	N.SDPTKAVIYQHLMG	78.24
1484	464	Q	1	7	.VIGQRT	78.24
1485	465	N	1	7	.TFSQNI	78.24
1486	466	G	1	14	.TRLGMFDKYSEHV	78.24
1487	467	G	1	13	.SDYLGAPEHNQV	78.24
1489	469	C	1	4	.CPR	78.24
1490	470	L	1	5	.HVLA	78.24
1694	508	A	1	12	.LSPYCTQAVIH	78.24
1695	509	A	1	12	.LSGAVIRHDNQ	78.24
1700	514	T	1	6	.SLGTA	78.24
1701	515	L	1	6	.VFTLQ	78.24
